# Supplementary material for: The host exosome pathway underpins biogenesis of the human cytomegalovirus virion
Source: eLife. 2020 Sep 10;9:e58288. doi: 10.7554/eLife.58288 (PMC7556872; doi:10.7554/eLife.58288)
Supplement: Supplementary file 1. [file elife-58288-supp1.xlsx]

## Sheet: MaxQuant search
UniProt protein ID	Gene names	Fasta headers	Protein names	Peptide counts (all)	Peptide counts (razor+unique)	Peptide counts (unique)	Number of proteins	Peptides	Razor + unique peptides	Unique peptides	Peptides Shaved	Peptides Unshaved	Razor + unique peptides Shaved	Razor + unique peptides Unshaved	Unique peptides Shaved	Unique peptides Unshaved	Sequence coverage [%]	Unique + razor sequence coverage [%]	Unique sequence coverage [%]	Mol. weight [kDa]	Sequence length	Sequence lengths	Q-value	Score	Identification type Shaved	Identification type Unshaved	Sequence coverage Shaved [%]	Sequence coverage Unshaved [%]	Intensity	Intensity Shaved	Intensity Unshaved	LFQ intensity Shaved	LFQ intensity Unshaved	MS/MS count Shaved	MS/MS count Unshaved	MS/MS count	Only identified by site	Reverse	Potential contaminant	id	Peptide IDs	Peptide is razor	Mod. peptide IDs	Evidence IDs	MS/MS IDs	Best MS/MS	Oxidation (M) site IDs	Oxidation (M) site positions
Q86V21	AACS	Acetoacetyl-CoA synthetase OS=Homo sapiens GN=AACS PE=1 SV=1	Acetoacetyl-CoA synthetase	2	2	2	1	2	2	2	0	2	0	2	0	2	3	3	3	75.143	672	672	0.00078895	14.051		By MS/MS	0	3	3868000	0	3868000	0	3868000	0	2	2				1973	8015;21924	True;True	8637;23892	21339;60643	21022;60795	21022;60795
Q2M2I8	AAK1	AP2-associated protein kinase 1 OS=Homo sapiens GN=AAK1 PE=1 SV=3	AP2-associated protein kinase 1	3	3	3	1	3	3	3	0	3	0	3	0	3	5.9	5.9	5.9	103.88	961	961	0	19.595		By MS/MS	0	5.9	7366000	0	7366000	0	7366000	0	4	4				1788	5983;8013;13539	True;True;True	6457;8635;14552	15837;15838;21336;36542	15517;15518;21019;36564	15518;21019;36564
P49588	AARS	Alanine--tRNA ligase, cytoplasmic OS=Homo sapiens GN=AARS PE=1 SV=2	Alanine--tRNA ligase, cytoplasmic	31	31	31	1	31	31	31	5	31	5	31	5	31	52.4	52.4	52.4	106.81	968	968	0	323.31	By MS/MS	By MS/MS	6.2	52.4	810530000	356200	810170000	436400	777300000	3	92	95				1106	1923;2276;2441;3461;3907;4639;5343;7977;8295;10818;11017;13863;14027;14116;14277;14326;14593;15524;15620;15793;16129;16287;17547;18703;19128;19148;20144;20487;20502;21856;22689	True;True;True;True;True;True;True;True;True;True;True;True;True;True;True;True;True;True;True;True;True;True;True;True;True;True;True;True;True;True;True	2083;2463;2637;3733;4222;4223;5004;5769;8597;8934;11641;11859;14898;15074;15075;15209;15210;15451;15452;15515;15516;15915;15916;16970;17075;17262;17629;17796;19155;20396;20855;20876;21949;22322;22323;22338;23819;24706	5274;5275;6212;6213;6214;6649;6650;9338;9339;9340;10519;10520;10521;10522;12341;12342;12343;14172;14173;14174;14175;14176;14177;21239;21240;22099;22100;28956;28957;29573;29574;29575;37564;37565;37566;37567;38013;38014;38015;38016;38017;38018;38312;38313;38314;38315;38316;38849;38850;38851;38963;38964;38965;38966;38967;39971;39972;39973;39974;42711;42712;42972;42973;43425;44405;44406;44407;44408;4…	5201;5202;5203;6106;6107;6108;6504;6505;9111;9112;9113;9114;10289;10290;10291;10292;10293;10294;12124;13914;13915;13916;13917;20934;20935;21739;28885;28886;29543;29544;29545;29546;37658;37659;38102;38103;38104;38105;38106;38107;38402;38403;38404;38405;38406;38944;38945;38946;38947;38948;38949;38950;39053;39054;39055;39056;39057;39058;40198;40199;40200;43054;43055;43354;43355;43778;44746;44747;447…	5202;6108;6504;9113;10292;12124;13914;20934;21739;28885;29544;37658;38102;38405;38945;39058;40199;43054;43355;43778;44746;45127;48359;51563;52956;53006;55902;56779;56815;60622;62711	1301;1302;1303;1304;1305;1306;1307;1308	1;117;178;255;293;514;880;888
Q5JTZ9	AARS2	Alanine--tRNA ligase, mitochondrial OS=Homo sapiens GN=AARS2 PE=1 SV=1	Alanine--tRNA ligase, mitochondrial	3	3	3	1	3	3	3	0	3	0	3	0	3	5.6	5.6	5.6	107.34	985	985	0	20.809		By MS/MS	0	5.6	3287000	0	3287000	0	3287000	0	2	2				1831	11795;12573;21741	True;True;True	12686;13510;23692	31743;33827;33828;60133	31772;33954;60318	31772;33954;60318
O75027	ABCB7	ATP-binding cassette sub-family B member 7, mitochondrial OS=Homo sapiens GN=ABCB7 PE=1 SV=2	ATP-binding cassette sub-family B member 7, mitochondrial	4	4	4	1	4	4	4	0	4	0	4	0	4	11	11	11	82.64	752	752	0	33.864		By MS/MS	0	11	11545000	0	11545000	0	11545000	0	4	4				263	472;2296;15948;19985	True;True;True;True	520;2485;17433;21777	1362;6279;43933;43934;54985	1377;6170;44270;55370	1377;6170;44270;55370
P33527	ABCC1	Multidrug resistance-associated protein 1 OS=Homo sapiens GN=ABCC1 PE=1 SV=3	Multidrug resistance-associated protein 1	27	27	27	1	27	27	27	1	27	1	27	1	27	25.3	25.3	25.3	171.59	1531	1531	0	296.63	By matching	By MS/MS	0.6	25.3	278270000	10186	278260000	0	263670000	0	44	44				936	2439;2525;3218;3232;4950;5559;5855;6148;7725;8624;8815;8929;9134;9141;9816;9917;10299;10366;10601;10749;14497;14599;16411;17994;20128;20778;22759	True;True;True;True;True;True;True;True;True;True;True;True;True;True;True;True;True;True;True;True;True;True;True;True;True;True;True	2635;2726;3472;3488;5341;5996;6321;6635;8326;9298;9501;9620;9838;9846;10558;10665;11067;11156;11404;11405;11568;15768;15769;15926;17926;19642;21933;22641;24781	6642;6643;6644;6645;6895;8681;8682;8683;8684;8717;8718;13167;14768;15524;15525;16230;20601;22982;22983;23510;23839;23840;24332;24343;24344;26171;26172;26449;27507;27508;27721;27722;28333;28334;28335;28778;28779;28780;39538;39539;39540;39991;45163;49342;55412;57321;57322;57323;62935	6498;6499;6500;6758;8501;8502;8503;8504;8532;12945;14502;15213;15901;20357;22561;22562;23065;23405;24011;24020;26155;26156;26423;27454;27665;27666;27667;27668;28233;28234;28726;28727;39632;39633;39634;39635;40214;45428;49502;55835;57633;57634;57635;63212	6499;6758;8503;8532;12945;14502;15213;15901;20357;22562;23065;23405;24011;24020;26155;26423;27454;27666;28234;28727;39633;40214;45428;49502;55835;57633;63212	1060;1061;1062;1063	849;1086;1254;1386
O15439	ABCC4	Multidrug resistance-associated protein 4 OS=Homo sapiens GN=ABCC4 PE=1 SV=3	Multidrug resistance-associated protein 4	20	20	20	1	20	20	20	1	20	1	20	1	20	20.9	20.9	20.9	149.52	1325	1325	0	170.62	By matching	By MS/MS	0.8	20.9	102800000	37806	102760000	0	102300000	0	29	29				168	248;517;645;2438;3234;3771;3896;8740;10287;10543;11281;12517;14119;15441;16839;18067;20526;20689;20757;21464	True;True;True;True;True;True;True;True;True;True;True;True;True;True;True;True;True;True;True;True	272;570;704;2634;3490;4060;4211;9418;11055;11343;12135;13452;15214;15215;16882;18394;19719;22363;22539;22620;23393	715;716;1460;1461;1462;1808;6639;6640;6641;8726;10089;10090;10491;10492;23271;27477;28190;28191;30251;33693;33694;33695;38321;38322;38323;42496;42497;42498;46284;49520;56549;56994;57254;57255;59282;59283;59284	745;1475;1476;1806;6495;6496;6497;8543;9795;9796;10263;10264;22826;27420;28098;28099;30144;33827;33828;38413;38414;42849;42850;46460;49668;56887;57333;57561;59410	745;1475;1806;6495;8543;9795;10263;22826;27420;28099;30144;33827;38413;42849;46460;49668;56887;57333;57561;59410	100	1166
P28288	ABCD3	ATP-binding cassette sub-family D member 3 OS=Homo sapiens GN=ABCD3 PE=1 SV=1	ATP-binding cassette sub-family D member 3	5	5	5	1	5	5	5	0	5	0	5	0	5	11.2	11.2	11.2	75.475	659	659	0	43.929		By MS/MS	0	11.2	22513000	0	22513000	0	22513000	0	6	6				867	5219;6492;16275;17387;18326	True;True;True;True;True	5633;7005;17784;18976;19991	13835;13836;17125;44773;47733;50175;50176	13609;16759;45080;47888;50298;50299;50300	13609;16759;45080;47888;50299
P61221	ABCE1	ATP-binding cassette sub-family E member 1 OS=Homo sapiens GN=ABCE1 PE=1 SV=1	ATP-binding cassette sub-family E member 1	11	11	11	1	11	11	11	6	11	6	11	6	11	26.9	26.9	26.9	67.314	599	599	0	153.87	By MS/MS	By MS/MS	13.2	26.9	90639000	264610	90374000	870770	89768000	3	21	24				1283	431;1109;2696;5228;8541;8718;12531;15733;19474;20777;22245	True;True;True;True;True;True;True;True;True;True;True	473;474;1207;2909;5642;9209;9396;13468;17199;21232;22640;24234	1239;1240;1241;1242;3064;3065;7358;7359;7360;7361;7362;13870;13871;13872;13873;22755;22756;22757;23212;23213;23214;33713;33714;43279;53645;53646;53647;57317;57318;57319;57320;61455;61456	1264;1265;1266;3014;7246;7247;7248;7249;13639;13640;13641;13642;22349;22350;22351;22352;22773;33851;33852;43654;53966;53967;57631;57632;61614;61615	1266;3014;7249;13641;22352;22773;33852;43654;53966;57632;61614	1478	239
Q8NE71	ABCF1	ATP-binding cassette sub-family F member 1 OS=Homo sapiens GN=ABCF1 PE=1 SV=2	ATP-binding cassette sub-family F member 1	11	11	11	1	11	11	11	0	11	0	11	0	11	20.7	20.7	20.7	95.925	845	845	0	114.95		By MS/MS	0	20.7	81449000	0	81449000	0	81449000	0	15	15				2057	197;1482;6520;7502;9891;13214;14173;15425;18348;19260;21771	True;True;True;True;True;True;True;True;True;True;True	218;1603;7033;8093;10639;14208;15298;16866;20014;20994;23730	561;4098;4099;17194;19979;19980;26374;26375;35650;35651;38521;38522;42475;50234;50235;52986;60242;60243	587;3961;16821;19672;26356;35706;35707;38609;38610;42829;50349;53273;53274;60436;60437	587;3961;16821;19672;26356;35706;38609;42829;50349;53273;60436
Q9UG63	ABCF2	ATP-binding cassette sub-family F member 2 OS=Homo sapiens GN=ABCF2 PE=1 SV=2	ATP-binding cassette sub-family F member 2	7	7	7	1	7	7	7	0	7	0	7	0	7	13	13	13	71.289	623	623	0	46.013		By MS/MS	0	13	19555000	0	19555000	0	19555000	0	8	8				2638	5572;10445;12459;13712;19435;19999;22963	True;True;True;True;True;True;True	6010;11240;13392;14736;21189;21791;24994	14796;27922;27923;33522;37124;53525;55014;55015;63440;63441	14533;27845;27846;33651;37223;53856;55396;55397;63695	14533;27845;33651;37223;53856;55396;63695
Q9NUQ8	ABCF3	ATP-binding cassette sub-family F member 3 OS=Homo sapiens GN=ABCF3 PE=1 SV=2	ATP-binding cassette sub-family F member 3	4	4	4	1	4	4	4	0	4	0	4	0	4	7.2	7.2	7.2	79.744	709	709	0	25.109		By MS/MS	0	7.2	23908000	0	23908000	0	23908000	0	5	5				2536	1323;2079;11865;13513	True;True;True;True	1439;2246;12759;14524	3668;5650;31909;36481;36482	3549;5567;31920;36515;36516	3549;5567;31920;36515
Q9NUJ1	ABHD10	Mycophenolic acid acyl-glucuronide esterase, mitochondrial OS=Homo sapiens GN=ABHD10 PE=1 SV=1	Mycophenolic acid acyl-glucuronide esterase, mitochondrial	4	4	4	1	4	4	4	0	4	0	4	0	4	19.3	19.3	19.3	33.932	306	306	0	67.082		By MS/MS	0	19.3	13721000	0	13721000	0	13721000	0	4	4				2534	5461;6648;7016;21059	True;True;True;True	5893;7170;7569;22942	14542;17552;18611;58131	14307;17178;18271;58341	14307;17178;18271;58341
Q96IU4	ABHD14B	Alpha/beta hydrolase domain-containing protein 14B OS=Homo sapiens GN=ABHD14B PE=1 SV=1	Alpha/beta hydrolase domain-containing protein 14B	5	5	5	1	5	5	5	0	5	0	5	0	5	37.6	37.6	37.6	22.345	210	210	0	39.791		By MS/MS	0	37.6	37988000	0	37988000	0	37538000	0	7	7				2230	253;5292;7188;7422;19400	True;True;True;True;True	277;5714;7755;8008;21154	740;741;14051;19077;19760;53417;53418	769;770;13797;18740;19470;53755;53756	769;13797;18740;19470;53755
O95870	ABHD16A	Abhydrolase domain-containing protein 16A OS=Homo sapiens GN=ABHD16A PE=1 SV=3	Abhydrolase domain-containing protein 16A	2	2	2	1	2	2	2	0	2	0	2	0	2	9	9	9	63.243	558	558	0.00080808	15.007		By MS/MS	0	9	5443400	0	5443400	0	5443400	0	4	4				384	1669;18570	True;True	1815;20248	4576;4577;50896;50897	4419;4420;4421;51019	4420;51019
Q8IZP0	ABI1	Abl interactor 1 OS=Homo sapiens GN=ABI1 PE=1 SV=4	Abl interactor 1	6	6	5	1	6	6	5	0	6	0	6	0	5	17.9	17.9	14.8	55.08	508	508	0	61.227		By MS/MS	0	17.9	51217000	0	51217000	0	49165000	0	9	9				2017	630;631;1356;2516;14236;19931	True;True;True;True;True;True	688;689;1472;2716;15389;15390;21719	1774;1775;1776;3748;3749;3750;6877;38730;38731;38732;54849	1776;1777;3621;6740;6741;38841;38842;38843;55260	1776;1777;3621;6741;38841;55260	1992	86
Q12979	ABR	Active breakpoint cluster region-related protein OS=Homo sapiens GN=ABR PE=2 SV=2	Active breakpoint cluster region-related protein	2	2	2	1	2	2	2	0	2	0	2	0	2	6.4	6.4	6.4	97.597	859	859	0.00079083	14.104		By MS/MS	0	6.4	21972000	0	21972000	0	21972000	0	5	5				1540	2076;22166	True;True	2242;24146	5636;5637;5638;5639;61241	5556;5557;5558;5559;61410	5557;61410
P09110	ACAA1	3-ketoacyl-CoA thiolase, peroxisomal OS=Homo sapiens GN=ACAA1 PE=1 SV=2	3-ketoacyl-CoA thiolase, peroxisomal	8	8	8	1	8	8	8	0	8	0	8	0	8	33.5	33.5	33.5	44.292	424	424	0	124.18		By MS/MS	0	33.5	84361000	0	84361000	0	84361000	0	14	14				528	563;3349;4344;5500;9474;16680;17614;18536	True;True;True;True;True;True;True;True	620;3615;4695;5934;10205;18223;19230;20212	1604;1605;9041;11665;11666;11667;11668;14633;25187;25188;25189;25190;25191;45881;45882;45883;48353;50762;50763	1619;1620;8840;11481;11482;11483;14384;25014;25015;46057;48579;48580;50876;50877	1620;8840;11481;14384;25015;46057;48579;50877
P42765	ACAA2	3-ketoacyl-CoA thiolase, mitochondrial OS=Homo sapiens GN=ACAA2 PE=1 SV=2	3-ketoacyl-CoA thiolase, mitochondrial	9	9	9	1	9	9	9	0	9	0	9	0	9	43.3	43.3	43.3	41.924	397	397	0	155.41		By MS/MS	0	43.3	79396000	0	79396000	0	78238000	0	15	15				1028	3203;3365;3852;4670;4973;16627;19391;19422;21523	True;True;True;True;True;True;True;True;True	3455;3632;4150;4151;5038;5364;18164;21145;21176;23457	8636;8637;9086;10346;10347;10348;10349;10350;12445;12446;12447;13224;45707;45708;53396;53475;59417;59418;59419;59420	8463;8464;8883;10136;10137;10138;10139;12231;12232;12233;13005;45896;53731;53810;59535;59536	8463;8883;10138;12231;13005;45896;53731;53810;59536	1208	314
Q13085	ACACA	Acetyl-CoA carboxylase 1 OS=Homo sapiens GN=ACACA PE=1 SV=2	Acetyl-CoA carboxylase 1;Biotin carboxylase	12;2	12;2	12;2	2	12	12	12	0	12	0	12	0	12	7.3	7.3	7.3	265.55	2346	2346;2458	0	81.512		By MS/MS	0	7.3	30341000	0	30341000	0	30341000	0	14	14				1547	3465;7319;8791;10253;10781;12182;16414;19762;20378;21229;21400;21448	True;True;True;True;True;True;True;True;True;True;True;True	3737;7896;9473;11020;11602;13097;17929;21535;22202;23141;23325;23374	9352;9353;19465;23441;27400;27401;28874;28875;32853;32854;45171;54402;56133;58645;59118;59119;59226	9133;9134;9135;19148;22999;27354;28814;28815;33064;45437;54747;54748;56501;58796;59243;59340	9134;19148;22999;27354;28815;33064;45437;54747;56501;58796;59243;59340
Q9UKU7	ACAD8	Isobutyryl-CoA dehydrogenase, mitochondrial OS=Homo sapiens GN=ACAD8 PE=1 SV=1	Isobutyryl-CoA dehydrogenase, mitochondrial	2	2	2	1	2	2	2	0	2	0	2	0	2	5.8	5.8	5.8	45.069	415	415	0.00078864	14.05		By MS/MS	0	5.8	2059100	0	2059100	0	2059100	0	2	2				2683	2305;14742	True;True	2494;16119	6297;6298;40486	6185;40690	6185;40690
Q9H845	ACAD9	Acyl-CoA dehydrogenase family member 9, mitochondrial OS=Homo sapiens GN=ACAD9 PE=1 SV=1	Acyl-CoA dehydrogenase family member 9, mitochondrial	8	8	8	1	8	8	8	0	8	0	8	0	8	22.1	22.1	22.1	68.76	621	621	0	67.939		By MS/MS	0	22.1	21601000	0	21601000	0	21601000	0	9	9				2457	6349;8058;11573;13371;19750;20468;21545;21558	True;True;True;True;True;True;True;True	6852;8683;12443;14378;21522;22300;23481;23494	16804;21441;21442;21443;31011;36118;54367;56374;59497;59538;59539	16501;21110;21111;30895;36186;54719;56723;59612;59669	16501;21110;30895;36186;54719;56723;59612;59669
P11310	ACADM	Medium-chain specific acyl-CoA dehydrogenase, mitochondrial OS=Homo sapiens GN=ACADM PE=1 SV=1	Medium-chain specific acyl-CoA dehydrogenase, mitochondrial	2	2	2	1	2	2	2	0	2	0	2	0	2	5.9	5.9	5.9	46.588	421	421	0	21.608		By MS/MS	0	5.9	10523000	0	10523000	0	10523000	0	7	7				584	5901;10990	True;True	6371;11825	15623;15624;29478;29479;29480	15297;15298;15299;29439;29440;29441;29442	15298;29440
P16219	ACADS	Short-chain specific acyl-CoA dehydrogenase, mitochondrial OS=Homo sapiens GN=ACADS PE=1 SV=1	Short-chain specific acyl-CoA dehydrogenase, mitochondrial	2	2	2	1	2	2	2	0	2	0	2	0	2	10.7	10.7	10.7	44.297	412	412	0	19.947		By MS/MS	0	10.7	31599000	0	31599000	0	31599000	0	3	3				662	10726;11454	True;True	11543;12320	28713;28714;30658	28654;28655;30522	28655;30522
P45954	ACADSB	Short/branched chain specific acyl-CoA dehydrogenase, mitochondrial OS=Homo sapiens GN=ACADSB PE=1 SV=1	Short/branched chain specific acyl-CoA dehydrogenase, mitochondrial	3	3	3	1	3	3	3	0	3	0	3	0	3	12	12	12	47.485	432	432	0	20.07		By MS/MS	0	12	2664100	0	2664100	0	2664100	0	2	2				1051	6556;20130;22942	True;True;True	7071;21935;24973	17304;55414;63401	16930;55837;63664	16930;55837;63664
P49748	ACADVL	Very long-chain specific acyl-CoA dehydrogenase, mitochondrial OS=Homo sapiens GN=ACADVL PE=1 SV=1	Very long-chain specific acyl-CoA dehydrogenase, mitochondrial	14	14	14	1	14	14	14	1	14	1	14	1	14	33.4	33.4	33.4	70.389	655	655	0	130.38	By MS/MS	By MS/MS	1.7	33.4	127350000	37698	127320000	0	127320000	1	28	29				1113	5252;5608;6709;7812;7973;8071;8110;8480;9973;10709;11574;13917;15384;19551	True;True;True;True;True;True;True;True;True;True;True;True;True;True	5669;6047;7235;8422;8593;8697;8741;9141;10725;11526;12444;14957;16819;21313	13936;13937;14897;14898;17752;17753;20828;21230;21231;21501;21502;21630;21631;21632;22592;22593;22594;22595;26597;26598;28679;28680;31012;31013;31014;31015;37730;42366;42367;53857	13687;13688;14628;14629;14630;17403;17404;20568;20928;20929;21215;21333;21334;22198;22199;22200;22201;22202;26557;26558;28629;30896;30897;30898;30899;37828;42731;42732;54195	13688;14628;17403;20568;20928;21215;21334;22200;26558;28629;30899;37828;42732;54195
Q15057	ACAP2	Arf-GAP with coiled-coil, ANK repeat and PH domain-containing protein 2 OS=Homo sapiens GN=ACAP2 PE=1 SV=3	Arf-GAP with coiled-coil, ANK repeat and PH domain-containing protein 2	6;1	6;1	6;1	2	6	6	6	0	6	0	6	0	6	11.4	11.4	11.4	88.028	778	778;834	0	39.525		By MS/MS	0	11.4	8444000	0	8444000	0	8444000	0	6	6				1689	3593;6859;14017;17042;18241;22034	True;True;True;True;True;True	3868;7391;15060;18608;19905;24004	9677;18170;37984;46879;49951;60920;60921	9428;17854;38070;47083;50080;61078	9428;17854;38070;47083;50080;61078
P24752	ACAT1	Acetyl-CoA acetyltransferase, mitochondrial OS=Homo sapiens GN=ACAT1 PE=1 SV=1	Acetyl-CoA acetyltransferase, mitochondrial	15	15	15	1	15	15	15	2	15	2	15	2	15	56.9	56.9	56.9	45.199	427	427	0	157.2	By MS/MS	By MS/MS	8.2	56.9	372040000	141210	371900000	135210	349380000	0	41	41				825	3303;4824;5849;6773;8489;9971;10811;12271;13041;14393;14943;15977;16154;19429;21209	True;True;True;True;True;True;True;True;True;True;True;True;True;True;True	3562;5206;5207;6314;6315;7301;9153;10723;11633;11634;13190;14022;15612;16338;17464;17655;21183;23119	8909;12867;12868;12869;12870;15508;15509;15510;15511;17940;17941;22627;22628;26593;26594;28932;28933;28934;28935;28936;28937;28938;28939;28940;28941;28942;33063;33064;33065;35212;35213;39185;39186;41020;41021;44012;44013;44014;44015;44493;44494;44495;44496;44497;53491;53492;53493;53494;58597	8711;12669;12670;12671;15192;15193;15194;15195;17601;17602;22231;22232;26554;28862;28863;28864;28865;28866;28867;28868;28869;28870;28871;28872;28873;33242;33243;33244;35272;39267;39268;41208;44346;44347;44348;44836;44837;44838;44839;44840;53826;53827;58758	8711;12671;15192;17601;22231;26554;28868;33243;35272;39268;41208;44347;44837;53826;58758	940;941;942	91;296;335
Q9BWD1	ACAT2	Acetyl-CoA acetyltransferase, cytosolic OS=Homo sapiens GN=ACAT2 PE=1 SV=2	Acetyl-CoA acetyltransferase, cytosolic	10	10	10	1	10	10	10	2	10	2	10	2	10	50.4	50.4	50.4	41.35	397	397	0	98.657	By matching	By MS/MS	4.5	50.4	621110000	109810	621000000	132580	599890000	0	30	30				2362	2186;5448;5617;9886;10916;12539;14477;19111;20062;21204	True;True;True;True;True;True;True;True;True;True	2362;5880;6056;10633;10634;11747;11748;13476;15742;15743;20837;21861;23114	5941;5942;5943;5944;14497;14498;14499;14500;14917;14918;26363;26364;29229;29230;29231;29232;29233;29234;29235;29236;33733;39498;39499;39500;39501;39502;52574;52575;52576;52577;52578;52579;55251;55252;55253;58576;58577;58578;58579	5838;5839;5840;5841;14269;14649;26347;26348;29169;29170;29171;29172;29173;29174;29175;29176;29177;33867;39599;39600;39601;39602;39603;52897;52898;52899;52900;55687;58738;58739	5839;14269;14649;26347;29174;33867;39603;52899;55687;58739	2135;2136;2137;2138	1;140;160;293
Q9H3P7	ACBD3	Golgi resident protein GCP60 OS=Homo sapiens GN=ACBD3 PE=1 SV=4	Golgi resident protein GCP60	4	4	4	1	4	4	4	0	4	0	4	0	4	11.6	11.6	11.6	60.593	528	528	0	49.947		By MS/MS	0	11.6	15240000	0	15240000	0	15240000	0	5	5				2429	286;2942;8399;10526	True;True;True;True	312;3172;9051;11326	827;8021;22369;22370;28152	852;7868;21984;21985;28065	852;7868;21985;28065
P12821	ACE	Angiotensin-converting enzyme OS=Homo sapiens GN=ACE PE=1 SV=1	Angiotensin-converting enzyme;Angiotensin-converting enzyme, soluble form	8	8	8	1	8	8	8	0	8	0	8	0	8	9	9	9	149.71	1306	1306	0	72.023		By MS/MS	0	9	26940000	0	26940000	0	26940000	0	9	9				604	3884;5169;5908;9443;12974;17230;17894;18671	True;True;True;True;True;True;True;True	4195;4196;5577;6378;10171;13951;18807;19533;20363	10446;10447;13712;15638;15639;25107;35038;47332;47333;49065;49066;51291	10216;10217;13485;15311;15312;24944;35110;47516;49220;51466	10217;13485;15311;24944;35110;47516;49220;51466	564	588
P53396	ACLY	ATP-citrate synthase OS=Homo sapiens GN=ACLY PE=1 SV=3	ATP-citrate synthase	30	30	30	1	30	30	30	8	30	8	30	8	30	39.1	39.1	39.1	120.84	1101	1101	0	323.31	By MS/MS	By MS/MS	8.4	39.1	909060000	282890	908770000	409280	881890000	4	79	83				1193	732;2372;3103;3376;3835;4697;4825;4965;5190;5311;6761;6824;7941;8851;9254;9922;11188;12239;12807;12863;14364;16205;17019;17431;17880;19077;19120;19647;20131;22038	True;True;True;True;True;True;True;True;True;True;True;True;True;True;True;True;True;True;True;True;True;True;True;True;True;True;True;True;True;True	794;2565;2566;3347;3348;3643;4129;5068;5208;5356;5601;5735;7288;7356;8561;9538;9968;10670;10671;12038;13156;13761;13819;15568;15569;17712;18581;18582;18583;19025;19026;19512;20800;20846;21413;21936;24009	2019;2020;6456;6457;6458;6459;8391;8392;8393;8394;9108;9109;10255;10256;10257;10258;12529;12530;12531;12871;12872;12873;12874;13196;13197;13198;13199;13759;13760;13761;13762;14100;14101;17903;18082;18083;18084;21141;21142;21143;23620;23621;23622;23623;24630;24631;26460;26461;26462;26463;26464;26465;26466;26467;26468;26469;30022;30023;32977;32978;34478;34479;34680;34681;34682;39077;39078;39079;446…	2022;6314;6315;6316;8251;8252;8253;8254;8901;8902;9991;9992;9993;9994;12321;12322;12672;12673;12674;12675;12970;12971;12972;12973;12974;13531;13532;13533;13534;13535;13843;17569;17751;17752;20843;20844;23217;23218;23219;23220;24393;26430;26431;26432;26433;26434;26435;26436;26437;29946;29947;33176;34532;34533;34534;34779;34780;39167;39168;39169;44945;47022;47023;47024;47025;47026;47027;48026;48027…	2022;6314;8254;8902;9992;12322;12673;12974;13535;13843;17569;17752;20844;23217;24393;26437;29947;33176;34533;34779;39168;44945;47025;48033;49171;52771;52919;54410;55838;61165	1370;1371;1372;1373;1374;1375;1376	512;529;583;586;642;666;712
P21399	ACO1	Cytoplasmic aconitate hydratase OS=Homo sapiens GN=ACO1 PE=1 SV=3	Cytoplasmic aconitate hydratase	21	21	21	1	21	21	21	1	21	1	21	1	21	36.7	36.7	36.7	98.398	889	889	0	182.35	By matching	By MS/MS	0.9	36.7	293030000	5289.6	293030000	0	286680000	0	37	37				781	1662;2130;2321;3082;3149;3174;3536;7266;9578;9761;11318;15075;15427;15955;17925;17932;18001;20733;20971;22746;22856	True;True;True;True;True;True;True;True;True;True;True;True;True;True;True;True;True;True;True;True;True	1808;2302;2512;3318;3396;3424;3811;7835;10312;10501;12174;16474;16868;17441;19567;19575;19650;22588;22589;22849;24768;24882	4565;4566;5794;6340;6341;8329;8330;8496;8562;8563;8564;9538;19318;19319;25469;25924;30331;41332;42478;42479;42480;43947;43948;43949;49150;49151;49152;49167;49168;49169;49358;49359;49360;57154;57155;57156;57157;57158;57159;57902;57903;57904;62883;62884;62885;63165;63166	4407;4408;5709;6219;8195;8346;8397;8398;9315;19019;25301;25752;30221;41528;42832;42833;44286;44287;44288;49309;49310;49311;49322;49323;49324;49517;49518;49519;57474;57475;57476;57477;57478;58129;58130;63161;63162;63426	4407;5709;6219;8195;8346;8397;9315;19019;25301;25752;30221;41528;42832;44288;49311;49322;49519;57474;58130;63161;63426	898	100
Q99798	ACO2	Aconitate hydratase, mitochondrial OS=Homo sapiens GN=ACO2 PE=1 SV=2	Aconitate hydratase, mitochondrial	24	24	24	1	24	24	24	4	24	4	24	4	24	44.1	44.1	44.1	85.424	780	780	0	240.61	By MS/MS	By MS/MS	6.3	44.1	247280000	125490	247150000	160210	238020000	1	54	55				2304	2751;3378;3491;4236;5301;7011;7693;7995;10931;11327;11822;11823;13234;13582;13587;14805;14835;18058;19965;20005;20008;20063;20552;22164	True;True;True;True;True;True;True;True;True;True;True;True;True;True;True;True;True;True;True;True;True;True;True;True	2968;3645;3763;4581;5723;7563;8293;8617;11763;12184;12714;12715;14230;14598;14603;16192;16224;19710;21753;21800;21801;21806;21807;21862;22389;22390;24144	7478;7479;9114;9115;9409;9410;9411;9412;11379;11380;11381;14067;14068;14069;18593;20517;20518;21288;29284;29285;29286;29287;29288;30351;31802;31803;35702;36667;36668;36669;36670;36681;36682;36683;40709;40710;40776;40777;40778;40779;40780;49498;49499;49500;49501;54931;55042;55043;55044;55056;55057;55058;55254;55255;55256;56636;56637;56638;56639;56640;61237;61238	7353;8905;8906;9187;9188;9189;11177;11178;11179;13808;18253;20290;20291;20974;29223;29224;29225;29226;29227;30239;31821;31822;35749;36683;36684;36693;36694;40907;40908;40971;40972;40973;40974;40975;49644;49645;49646;49647;49648;55327;55429;55430;55441;55442;55443;55444;55688;55689;56987;56988;56989;56990;56991;56992;61408	7353;8905;9189;11177;13808;18253;20291;20974;29227;30239;31821;31822;35749;36684;36693;40907;40971;49647;55327;55430;55442;55689;56988;61408	2099;2100;2101;2102	34;98;105;393
Q86TX2	ACOT1	Acyl-coenzyme A thioesterase 1 OS=Homo sapiens GN=ACOT1 PE=1 SV=1	Acyl-coenzyme A thioesterase 1	11	11	3	1	11	11	3	0	11	0	11	0	3	47	47	13.1	46.277	421	421	0	116.57		By MS/MS	0	47	205560000	0	205560000	0	200180000	0	24	24				1969	267;496;1667;1970;2550;3377;8100;8686;17225;19328;19432	True;True;True;True;True;True;True;True;True;True;True	291;292;549;1813;2131;2751;3644;8731;9362;18802;21072;21186	774;775;776;777;778;1422;1423;4574;5387;5388;6951;6952;9110;9111;9112;9113;21598;23135;47325;47326;53188;53507	802;803;804;805;806;1442;1443;4416;4417;5321;5322;5323;6804;8903;8904;21301;21302;22703;22704;22705;47510;53499;53837;53838	804;1443;4416;5323;6804;8903;21301;22704;47510;53499;53837	1984	200
Q9NPJ3	ACOT13	Acyl-coenzyme A thioesterase 13 OS=Homo sapiens GN=ACOT13 PE=1 SV=1	Acyl-coenzyme A thioesterase 13;Acyl-coenzyme A thioesterase 13, N-terminally processed	5	5	5	1	5	5	5	1	5	1	5	1	5	35	35	35	14.96	140	140	0	40.175	By matching	By MS/MS	7.1	35	13008000	8971.3	12999000	0	12483000	0	9	9				2498	7467;10759;14646;19184;19602	True;True;True;True;True	8056;8057;11579;15989;20914;21368	19895;19896;28811;28812;28813;28814;40159;52776;52777;53979;53980	19605;19606;28755;28756;40380;53077;53078;54315;54316	19606;28755;40380;53077;54315	2178	86
O00154	ACOT7	Cytosolic acyl coenzyme A thioester hydrolase OS=Homo sapiens GN=ACOT7 PE=1 SV=3	Cytosolic acyl coenzyme A thioester hydrolase	5	5	5	1	5	5	5	0	5	0	5	0	5	20.5	20.5	20.5	41.796	380	380	0	70.31		By MS/MS	0	20.5	82500000	0	82500000	0	82500000	0	9	9				65	2151;10334;12889;17878;19370	True;True;True;True;True	2323;11120;13846;19510;21124	5847;5848;27645;27646;34750;34751;49018;49019;53342	5753;27587;27588;34844;34845;49168;49169;53673;53674	5753;27588;34844;49169;53673
Q9Y305	ACOT9	Acyl-coenzyme A thioesterase 9, mitochondrial OS=Homo sapiens GN=ACOT9 PE=1 SV=2	Acyl-coenzyme A thioesterase 9, mitochondrial	9	9	9	1	9	9	9	1	9	1	9	1	9	24.6	24.6	24.6	49.901	439	439	0	59.03	By matching	By MS/MS	2.1	24.6	66391000	23479	66368000	0	66368000	0	12	12				2757	6415;7131;8386;17709;19674;19881;20651;21020;22626	True;True;True;True;True;True;True;True;True	6923;7693;9037;19333;21444;21665;22494;22901;24633	16938;16939;18932;22339;22340;22341;48580;48581;54172;54730;54731;56888;56889;58030;58031;58032;62407;62408;62409	16607;18603;21951;21952;48782;48783;54521;54522;55144;57210;58249;62528	16607;18603;21951;48783;54522;55144;57210;58249;62528
P24666	ACP1	Low molecular weight phosphotyrosine protein phosphatase OS=Homo sapiens GN=ACP1 PE=1 SV=3	Low molecular weight phosphotyrosine protein phosphatase	5	5	5	1	5	5	5	2	4	2	4	2	4	43	43	43	18.042	158	158	0	37.101	By MS/MS	By MS/MS	12.7	37.3	25385000	364200	25021000	0	24295000	4	8	12				824	4882;9725;13865;17985;20232	True;True;True;True;True	5269;10465;14900;19632;22044	13016;25844;25845;25846;25847;25848;37570;37571;49315;49316;55711;55712;55713	12803;25679;25680;25681;37661;37662;37663;37664;49480;49481;56113;56114;56115	12803;25679;37661;49480;56115
P11117	ACP2	Lysosomal acid phosphatase OS=Homo sapiens GN=ACP2 PE=1 SV=3	Lysosomal acid phosphatase	2	2	2	1	2	2	2	0	2	0	2	0	2	4.5	4.5	4.5	48.344	423	423	0.00074571	12.67		By MS/MS	0	4.5	704200	0	704200	0	704200	0	2	2				574	6903;13553	True;True	7438;14567	18306;36576	17990;36592	17990;36592
Q96CM8	ACSF2	Acyl-CoA synthetase family member 2, mitochondrial OS=Homo sapiens GN=ACSF2 PE=1 SV=2	Acyl-CoA synthetase family member 2, mitochondrial	11	11	11	1	11	11	11	1	11	1	11	1	11	34.1	34.1	34.1	68.124	615	615	0	78.784	By MS/MS	By MS/MS	1.3	34.1	68441000	0	68441000	0	68441000	2	14	16				2189	2442;3263;3837;7490;7895;13055;13563;16210;16226;21368;22508	True;True;True;True;True;True;True;True;True;True;True	2638;3521;4131;8081;8512;14036;14579;17718;17735;23290;24507	6651;6652;6653;6654;6655;8822;10260;19957;21039;35241;35242;36618;44614;44650;59044;59045;62099;62100	6506;6507;6508;6509;6510;8633;9996;19656;20752;35300;35301;36645;44953;44981;59178;62234	6509;8633;9996;19656;20752;35300;36645;44953;44981;59178;62234	2053	7
P33121	ACSL1	Long-chain-fatty-acid--CoA ligase 1 OS=Homo sapiens GN=ACSL1 PE=1 SV=1	Long-chain-fatty-acid--CoA ligase 1	4	4	4	1	4	4	4	0	4	0	4	0	4	6.3	6.3	6.3	77.942	698	698	0	25.395		By MS/MS	0	6.3	7207900	0	7207900	0	7207900	0	5	5				934	634;4180;12737;15127	True;True;True;True	692;4518;13688;16530	1782;11220;34288;34289;34290;41486;41487	1783;11006;34353;41666;41667	1783;11006;34353;41667
O95573	ACSL3	Long-chain-fatty-acid--CoA ligase 3 OS=Homo sapiens GN=ACSL3 PE=1 SV=3	Long-chain-fatty-acid--CoA ligase 3	15	15	14	1	15	15	14	1	15	1	15	1	14	28.2	28.2	25.7	80.419	720	720	0	152.95	By matching	By MS/MS	1.8	28.2	95125000	27503	95097000	0	93312000	0	24	24				366	403;3532;6391;7724;8731;9956;12497;12727;13456;15686;18468;19074;19365;21050;22064	True;True;True;True;True;True;True;True;True;True;True;True;True;True;True	442;3806;6894;8324;8325;9409;10708;13432;13678;14464;17149;20140;20797;21118;22933;24037	1175;1176;1177;9523;16880;20597;20598;20599;20600;23253;23254;26558;33642;34271;34272;36348;36349;43173;50586;52456;53319;53320;58110;58111;58112;58113;61026;61027	1207;9301;16561;20353;20354;20355;20356;22808;22809;26511;33789;34338;34339;36397;36398;43559;50691;52761;53643;53644;58325;58326;61214;61215	1207;9301;16561;20355;22808;26511;33789;34338;36397;43559;50691;52761;53643;58325;61215	207	537
O60488	ACSL4	Long-chain-fatty-acid--CoA ligase 4 OS=Homo sapiens GN=ACSL4 PE=1 SV=2	Long-chain-fatty-acid--CoA ligase 4	11	10	10	1	11	10	10	0	11	0	10	0	10	21.8	19.3	19.3	79.187	711	711	0	76.415		By MS/MS	0	21.8	67357000	0	67357000	0	66512000	0	12	12				235	5404;7726;8891;9955;13456;13604;20492;21231;22031;22089;22667	True;True;True;True;False;True;True;True;True;True;True	5833;5834;8327;9579;10707;14464;14621;22328;23143;24001;24065;24681	14336;14337;14338;20602;20603;23734;23735;23736;26556;26557;36348;36349;36717;36718;56445;58647;60917;61079;62543	14061;14062;20358;23313;26509;26510;36397;36398;36724;56792;58799;61075;61263;62667	14061;20358;23313;26509;36397;36724;56792;58799;61075;61263;62667	137	108
Q9NR19	ACSS2	Acetyl-coenzyme A synthetase, cytoplasmic OS=Homo sapiens GN=ACSS2 PE=1 SV=1	Acetyl-coenzyme A synthetase, cytoplasmic	9	9	9	1	9	9	9	1	9	1	9	1	9	16.8	16.8	16.8	78.579	701	701	0	67.809	By matching	By MS/MS	2.6	16.8	62244000	96111	62148000	0	62148000	0	14	14				2508	620;621;1979;4061;5516;6745;7492;7672;9927	True;True;True;True;True;True;True;True;True	678;679;2140;4392;5952;7272;8083;8271;10676	1758;1759;5404;10939;10940;14660;17866;17867;19960;19961;20466;26484;26485;26486;26487;26488	1759;1760;5335;10715;14408;17539;17540;19659;19660;20240;26449;26450;26451;26452	1759;1760;5335;10715;14408;17539;19659;20240;26449
P60709	ACTB	Actin, cytoplasmic 1 OS=Homo sapiens GN=ACTB PE=1 SV=1	Actin, cytoplasmic 1;Actin, cytoplasmic 1, N-terminally processed	27;4	27;4	2;0	2	27	27	2	17	27	17	27	1	2	76	76	7.2	41.736	375	375;375	0	323.31	By MS/MS	By MS/MS	60.5	76	80189000000	258110000	79931000000	321450000	63704000000	113	993	1106				1258	855;2279;2280;2692;2973;2974;3802;3803;3839;4265;4266;5437;5487;8953;9264;9265;9998;10943;11066;11657;14549;16110;16111;18546;19665;20017;22697	True;True;True;True;True;True;True;True;True;True;True;True;True;True;True;True;True;True;True;True;True;True;True;True;True;True;True	926;2466;2467;2900;2901;2902;3204;3205;3206;4095;4096;4097;4134;4135;4612;4613;5867;5868;5919;5920;9645;9978;9979;9980;9981;9982;10751;11775;11912;11913;12538;12539;15850;17608;17609;20224;21434;21435;21816;24716;24717	2352;2353;2354;2355;2356;2357;2358;2359;2360;2361;6221;6222;6223;6224;6225;6226;7263;7264;7265;7266;7267;7268;7269;7270;7271;7272;7273;7274;7275;7276;7277;7278;7279;7280;7281;7282;7283;7284;7285;7286;7287;7288;7289;7290;7291;7292;7293;7294;7295;7296;7297;7298;7299;8068;8069;8070;8071;8072;8073;8074;8075;8076;8077;8078;8079;8080;8081;8082;8083;8084;8085;8086;8087;8088;8089;8090;8091;8092;8093;8094…	2334;2335;2336;2337;2338;2339;2340;2341;2342;2343;2344;2345;2346;2347;2348;6113;6114;6115;6116;6117;6118;6119;7103;7104;7105;7106;7107;7108;7109;7110;7111;7112;7113;7114;7115;7116;7117;7118;7119;7120;7121;7122;7123;7124;7125;7126;7127;7128;7129;7130;7131;7132;7133;7134;7135;7136;7137;7138;7139;7140;7141;7142;7143;7144;7145;7146;7147;7148;7149;7150;7913;7914;7915;7916;7917;7918;7919;7920;7921;7922…	2339;6116;6119;7147;7981;7993;9878;9938;10031;11257;11273;14221;14357;23475;24430;24436;26608;29278;29681;31254;39938;44689;44702;50912;54482;55527;62818	1436;1437;1438;1439;1440;1441;1442;1443;1444;1445;1446	16;44;47;82;153;190;227;269;283;305;325
P68032	ACTC1	Actin, alpha cardiac muscle 1 OS=Homo sapiens GN=ACTC1 PE=1 SV=1;Actin, alpha skeletal muscle OS=Homo sapiens GN=ACTA1 PE=1 SV=1	Actin, alpha cardiac muscle 1;Actin, alpha skeletal muscle	23;21	9;7	0;0	2	23	9	0	14	23	5	9	0	0	70.3	42.4	0	42.019	377	377;377	0	153.19	By MS/MS	By MS/MS	41.1	70.3	3879900000	6631600	3873200000	8648800	3238700000	6	127	133				1386	855;2279;2280;2695;3802;3803;3838;4265;4266;5437;8954;9264;9265;9998;10943;11065;11656;14549;16109;18546;19664;20016;22696	False;False;False;True;False;False;True;False;False;False;True;False;False;False;False;True;True;False;True;False;True;True;True	926;2466;2467;2906;2907;2908;4095;4096;4097;4132;4133;4612;4613;5867;5868;9646;9978;9979;9980;9981;9982;10751;11775;11910;11911;12536;12537;15850;17607;20224;21432;21433;21815;24714;24715	2352;2353;2354;2355;2356;2357;2358;2359;2360;2361;6221;6222;6223;6224;6225;6226;7350;7351;7352;7353;7354;7355;7356;7357;10169;10170;10171;10172;10173;10174;10175;10176;10177;10178;10179;10180;10181;10182;10183;10184;10185;10186;10187;10188;10189;10190;10191;10192;10193;10194;10195;10196;10197;10261;10262;10263;10264;10265;10266;10267;11451;11452;11453;11454;11455;11456;11457;11458;11459;11460;114…	2334;2335;2336;2337;2338;2339;2340;2341;2342;2343;2344;2345;2346;2347;2348;6113;6114;6115;6116;6117;6118;6119;7238;7239;7240;7241;7242;7243;7244;7245;9871;9872;9873;9874;9875;9876;9877;9878;9879;9880;9881;9882;9883;9884;9885;9886;9887;9888;9889;9890;9891;9892;9893;9894;9895;9896;9897;9898;9899;9900;9901;9902;9903;9904;9905;9906;9907;9908;9909;9910;9911;9912;9913;9914;9915;9916;9917;9918;9919;9920…	2339;6116;6119;7239;9878;9938;9998;11257;11273;14221;23478;24430;24436;26608;29278;29648;31160;39938;44683;50912;54449;55462;62804	1439;1441;1443;1444;1595;1596;1597;1598;1599;1600	46;49;84;178;192;229;271;285;307;327
O96019	ACTL6A	Actin-like protein 6A OS=Homo sapiens GN=ACTL6A PE=1 SV=1	Actin-like protein 6A	3	3	3	1	3	3	3	0	3	0	3	0	3	15.6	15.6	15.6	47.46	429	429	0	20.89		By MS/MS	0	15.6	14430000	0	14430000	0	14430000	0	4	4				392	5603;17185;18315	True;True;True	6042;18762;19980	14889;47232;50142	14620;47421;50254;50255	14620;47421;50254
P12814	ACTN1	Alpha-actinin-1 OS=Homo sapiens GN=ACTN1 PE=1 SV=2	Alpha-actinin-1	55;14;11	37;4;3	37;4;3	3	55	37	37	20	55	13	37	13	37	77.1	56.3	56.3	103.06	892	892;894;901	0	323.31	By MS/MS	By MS/MS	29.8	77.1	3017000000	1617900	3015400000	3052100	2883700000	8	145	153				603	209;336;964;965;1126;1262;1927;1928;1953;2707;3023;3294;3408;3719;4054;4552;5245;5707;6180;6543;8096;8899;9019;9335;9523;9623;10131;10339;10628;10904;11025;11049;11179;11512;11569;11711;12653;12906;13852;14037;14086;14386;14690;15651;15708;16126;16293;16792;17619;18950;19125;20354;20614;20845;21289	True;True;True;True;False;False;True;True;False;False;True;True;True;False;True;True;False;False;True;False;True;False;False;False;True;True;True;True;True;True;True;True;False;True;False;False;True;False;True;True;True;True;True;True;True;True;True;True;True;False;False;True;False;True;True	231;364;1045;1046;1226;1227;1371;2087;2088;2114;2920;3259;3553;3678;4001;4384;4913;5661;6153;6670;6671;7057;8725;8726;9587;9716;10056;10256;10361;10889;11125;11126;11438;11439;11734;11735;11868;11894;12029;12378;12439;12596;13598;13867;13868;14886;15090;15091;15092;15163;15598;15599;16050;16051;17109;17172;17173;17626;17802;18343;19235;20663;20851;22177;22456;22716;22717;23203	591;973;974;975;976;977;978;2655;2656;2657;2658;2659;2660;2661;2662;3113;3114;3115;3116;3117;3118;3119;3489;3490;3491;3492;5283;5284;5347;5348;5349;5350;5351;5352;7381;7382;7383;8212;8882;8883;9205;9206;9207;9208;9962;9963;10916;10917;12136;13917;13918;13919;15123;15124;15125;16349;16350;16351;16352;16353;16354;16355;16356;17266;17267;17268;17269;17270;17271;21574;21575;21576;21577;21578;23758;23…	615;1015;1016;1017;1018;1019;1020;2612;2613;2614;2615;2616;2617;3052;3053;3054;3055;3056;3057;3058;3385;3386;3387;3388;5211;5212;5282;5283;5284;5285;5286;7264;8081;8691;8692;8983;8984;8985;9681;9682;9683;10685;11921;13674;13675;13676;13677;13678;14823;14824;14825;14826;14827;14828;14829;14830;14831;16046;16047;16048;16049;16050;16051;16052;16053;16054;16895;16896;16897;16898;16899;16900;16901;212…	615;1019;2615;2617;3058;3387;5211;5212;5286;7264;8081;8691;8984;9682;10685;11921;13677;14824;16052;16897;21281;23337;23740;24582;25178;25423;26972;27596;28415;29137;29558;29605;29928;30699;30890;31565;34174;34893;37627;38144;38302;39236;40534;43426;43596;44741;45162;46358;48593;52337;52934;56416;57136;57811;58950	112;115;552;553;554;555;556;557;558;559;560;561;562;563	66;221;239;276;360;529;586;660;748;796;830;845;864;880
O43707	ACTN4	Alpha-actinin-4 OS=Homo sapiens GN=ACTN4 PE=1 SV=2	Alpha-actinin-4	58	58	39	1	58	58	39	24	57	24	57	17	38	72.3	72.3	49.6	104.85	911	911	0	323.31	By MS/MS	By MS/MS	34.5	72.3	7567500000	5512700	7562000000	15268000	7253900000	22	234	256				211	337;338;962;963;1126;1262;1926;1953;2707;3027;3291;3381;3390;3719;4551;4712;5245;5707;6266;6543;8097;8899;9019;9279;9281;9335;9522;10340;10629;11023;11024;11050;11179;11569;11711;12906;13411;13451;13851;14036;14387;14691;14983;15652;16120;16152;16324;16789;17370;17616;18950;19125;19131;20353;20614;20828;20844;21403	True;True;True;True;True;True;True;True;True;True;True;True;True;True;True;True;True;True;True;True;True;True;True;True;True;True;True;True;True;True;True;True;True;True;True;True;True;True;True;True;True;True;True;True;True;True;True;True;True;True;True;True;True;True;True;True;True;True	365;366;1043;1044;1226;1227;1371;2086;2114;2920;3263;3550;3649;3659;4001;4912;5084;5661;6153;6760;7057;8727;8728;9587;9716;9996;9998;10056;10255;11127;11440;11866;11867;11895;12029;12439;12596;13867;13868;14418;14459;14885;15088;15089;15600;15601;16052;16053;16379;17110;17620;17653;17835;18340;18957;19232;20663;20851;20858;22176;22456;22697;22714;22715;23328	979;980;981;982;983;984;985;986;987;988;989;2651;2652;2653;2654;3113;3114;3115;3116;3117;3118;3119;3489;3490;3491;3492;5280;5281;5282;5347;5348;5349;5350;5351;5352;7381;7382;7383;8218;8219;8220;8875;8876;8877;8878;9124;9125;9145;9146;9147;9962;9963;12133;12134;12135;12565;12566;12567;12568;13917;13918;13919;15123;15124;15125;16571;16572;16573;16574;16575;16576;16577;16578;17266;17267;17268;17269;…	1021;1022;1023;1024;1025;1026;1027;1028;1029;2609;2610;2611;3052;3053;3054;3055;3056;3057;3058;3385;3386;3387;3388;5206;5207;5208;5209;5210;5282;5283;5284;5285;5286;7264;8086;8087;8088;8684;8685;8686;8687;8688;8915;8933;8934;9681;9682;9683;11918;11919;11920;12354;12355;13674;13675;13676;13677;13678;14823;14824;14825;14826;14827;14828;14829;14830;14831;16249;16250;16251;16252;16253;16254;16255;168…	1028;1029;2609;2610;3058;3387;5209;5286;7264;8088;8684;8915;8933;9682;11918;12354;13677;14824;16255;16897;21287;23337;23740;24458;24461;24582;25174;27598;28416;29555;29556;29609;29928;30890;31565;34893;36290;36391;37608;38140;39246;40546;41311;43428;44727;44834;45225;46355;47830;48583;52337;52934;52961;56412;57136;57751;57798;59248	112;113;114;115;116;117;118;119	85;240;258;295;379;767;815;883
Q9NZ32	ACTR10	Actin-related protein 10 OS=Homo sapiens GN=ACTR10 PE=1 SV=1	Actin-related protein 10	5	5	5	1	5	5	5	0	5	0	5	0	5	23.7	23.7	23.7	46.306	417	417	0	126.92		By MS/MS	0	23.7	38722000	0	38722000	0	37407000	0	15	15				2578	5591;6043;6120;7005;15821	True;True;True;True;True	6029;6521;6522;6604;7557;17290	14854;14855;15986;15987;15988;15989;15990;16176;16177;16178;18583;18584;43493;43494;43495	14582;14583;14584;15665;15666;15667;15668;15846;15847;15848;15849;15850;18243;43838;43839	14582;15666;15848;18243;43839	2206	199
P61163	ACTR1A	Alpha-centractin OS=Homo sapiens GN=ACTR1A PE=1 SV=1	Alpha-centractin	14	14	9	1	14	14	9	3	14	3	14	2	9	54	54	37	42.613	376	376	0	323.31	By MS/MS	By MS/MS	13	54	871160000	202260	870960000	249860	851660000	2	47	49				1281	355;856;1678;1870;3121;4095;4526;5304;10944;11102;14238;19229;19668;22221	True;True;True;True;True;True;True;True;True;True;True;True;True;True	384;927;1825;2027;3367;4429;4887;5726;11776;11951;15393;15394;20961;21438;24205	1024;1025;1026;1027;1028;1029;2362;2363;2364;2365;4600;4601;5123;5124;5125;5126;5127;5128;5129;8439;11030;11031;11032;11033;11034;11035;12085;12086;12087;14077;14078;29349;29350;29819;29820;29821;38735;38736;38737;38738;38739;38740;38741;52887;52888;52889;54161;54162;61394;61395;61396	1061;1062;1063;1064;1065;1066;1067;2349;2350;4442;4443;4444;4445;5038;5039;5040;5041;5042;5043;8297;10817;10818;10819;10820;10821;10822;10823;11880;11881;13815;13816;29316;29317;29318;29764;29765;29766;38846;38847;38848;38849;38850;38851;38852;53177;53178;54511;54512;61547	1063;2350;4442;5042;8297;10820;11880;13815;29316;29765;38851;53177;54512;61547	1477	1
P42025	ACTR1B	Beta-centractin OS=Homo sapiens GN=ACTR1B PE=1 SV=1	Beta-centractin	10	5	5	1	10	5	5	1	10	0	5	0	5	44.9	27.9	27.9	42.293	376	376	0	48.676	By matching	By MS/MS	2.7	44.9	138990000	0	138990000	0	127470000	0	12	12				1016	856;1677;4096;4526;10944;14237;19668;21129;21437;22221	False;True;True;False;False;True;False;True;True;False	927;1824;4430;4887;11776;15391;15392;21438;23015;23363;24205	2362;2363;2364;2365;4599;11036;12085;12086;12087;29349;29350;38733;38734;54161;54162;58311;58312;58313;58314;58315;58316;58317;59205;59206;61394;61395;61396	2349;2350;4440;4441;10824;10825;11880;11881;29316;29317;29318;38844;38845;54511;54512;58512;58513;58514;58515;58516;59324;61547	2350;4440;10824;11880;29316;38845;54512;58516;59324;61547	1196	1
P61160	ACTR2	Actin-related protein 2 OS=Homo sapiens GN=ACTR2 PE=1 SV=1	Actin-related protein 2	13	13	13	1	13	13	13	2	13	2	13	2	13	44.9	44.9	44.9	44.76	394	394	0	169.09	By MS/MS	By MS/MS	8.4	44.9	394590000	77762	394510000	103600	371200000	1	44	45				1280	3542;3738;6650;8886;9150;9215;10237;11416;11524;11658;17882;20559;21876	True;True;True;True;True;True;True;True;True;True;True;True;True	3817;4021;4022;7172;9574;9855;9856;9925;11000;11001;12279;12391;12540;19515;19516;22397;23841	9555;9556;10010;10011;10012;10013;10014;17572;23720;23721;23722;24364;24365;24366;24367;24540;24541;27348;27349;27350;27351;27352;27353;30562;30563;30866;30867;30868;30869;30870;30871;31406;31407;31408;49024;49025;49026;49027;49028;49029;49030;56659;56660;60523;60524	9330;9723;9724;9725;9726;9727;9728;9729;17216;17217;23303;23304;23305;24050;24051;24052;24296;27294;27295;27296;27297;27298;27299;27300;30443;30444;30764;30765;30766;30767;30768;30769;31459;31460;31461;49174;49175;49176;49177;49178;49179;57007;57008;57009;60692;60693	9330;9728;17217;23304;24052;24296;27297;30443;30768;31459;49179;57007;60692	1473;1474;1475;1476	56;74;114;309
P61158	ACTR3	Actin-related protein 3 OS=Homo sapiens GN=ACTR3 PE=1 SV=3	Actin-related protein 3	21;3;2	21;3;2	21;3;2	3	21	21	21	4	21	4	21	4	21	71.5	71.5	71.5	47.371	418	418;418;210	0	270.41	By MS/MS	By MS/MS	12.4	71.5	1446100000	588170	1445500000	811560	1406600000	1	72	73				1279	652;945;3524;4134;5136;5150;6356;6908;6973;8751;9096;11075;11097;12312;13369;15126;16773;19309;20501;22216;22833	True;True;True;True;True;True;True;True;True;True;True;True;True;True;True;True;True;True;True;True;True	711;1025;3798;4471;5542;5556;6859;7443;7523;7524;9430;9798;11922;11946;13232;14376;16528;16529;18324;21050;22337;24198;24199;24858	1821;1822;1823;1824;1825;2610;2611;9501;9502;11127;11128;13622;13623;13660;13661;13662;16824;18315;18491;18492;18493;18494;18495;18496;18497;23298;23299;23300;23301;23302;23303;23304;24260;24261;29739;29740;29809;33172;33173;33174;33175;33176;33177;36114;36115;36116;41480;41481;41482;41483;41484;41485;46138;46139;46140;46141;53121;53122;53123;53124;53125;53126;53127;53128;53129;53130;56469;61381;…	1817;1818;1819;1820;1821;1822;2569;2570;9281;9282;10905;10906;10907;10908;10909;13405;13406;13441;13442;16514;17999;18000;18001;18152;18153;18154;18155;18156;18157;22850;22851;22852;22853;22854;22855;23920;23921;29702;29703;29704;29757;33344;33345;33346;33347;36181;36182;36183;36184;41662;41663;41664;41665;46312;53424;53425;53426;53427;53428;53429;53430;53431;53432;53433;53434;53435;53436;56813;6…	1821;2569;9281;10908;13406;13442;16514;17999;18152;22855;23920;29702;29757;33347;36181;41665;46312;53429;56813;61540;63382	1470;1471;1472	93;327;383
Q03154	ACY1	Aminoacylase-1 OS=Homo sapiens GN=ACY1 PE=1 SV=1	Aminoacylase-1	3	3	3	1	3	3	3	0	3	0	3	0	3	13.7	13.7	13.7	45.884	408	408	0.00043497	18.652		By MS/MS	0	13.7	15131000	0	15131000	0	15131000	0	3	3				1466	857;3874;12784	True;True;True	928;4182;13738	2366;10423;34435	2351;10195;34496	2351;10195;34496
P07311	ACYP1	Acylphosphatase-1 OS=Homo sapiens GN=ACYP1 PE=1 SV=2	Acylphosphatase-1	3	3	3	1	3	3	3	2	2	2	2	2	2	39.4	39.4	39.4	11.261	99	99	0	20.34	By MS/MS	By MS/MS	26.3	23.2	2740400	131470	2608900	0	2608900	1	2	3				483	585;8722;11803	True;True;True	642;9400;12695	1656;23225;31764;31765	1667;22782;31788	1667;22782;31788
P00813	ADA	Adenosine deaminase OS=Homo sapiens GN=ADA PE=1 SV=3	Adenosine deaminase	7	7	7	1	7	7	7	1	7	1	7	1	7	23.7	23.7	23.7	40.764	363	363	0	52.675	By MS/MS	By MS/MS	2.8	23.7	17469000	0	17469000	0	17469000	1	7	8				410	1848;2481;3861;9511;14873;18338;19783	True;True;True;True;True;True;True	2004;2678;4165;10244;16264;20003;21557	5062;5063;5064;6748;10380;25307;40856;50204;50205;54456;54457	4960;4961;6579;10161;25142;41047;50326;54806	4961;6579;10161;25142;41047;50326;54806	251	353
O14672	ADAM10	Disintegrin and metalloproteinase domain-containing protein 10 OS=Homo sapiens GN=ADAM10 PE=1 SV=1	Disintegrin and metalloproteinase domain-containing protein 10	4	4	4	1	4	4	4	0	4	0	4	0	4	10.7	10.7	10.7	84.141	748	748	0	27.752		By MS/MS	0	10.7	6622400	0	6622400	0	6622400	0	5	5				110	3144;4335;9393;21488	True;True;True;True	3391;4686;10119;23417	8487;8488;11637;24992;59334	8339;11441;24830;59461;59462	8339;11441;24830;59461
P78536	ADAM17	Disintegrin and metalloproteinase domain-containing protein 17 OS=Homo sapiens GN=ADAM17 PE=1 SV=1	Disintegrin and metalloproteinase domain-containing protein 17	2	2	2	1	2	2	2	0	2	0	2	0	2	6.1	6.1	6.1	93.02	824	824	0.00078616	13.953		By MS/MS	0	6.1	3973300	0	3973300	0	3973300	0	2	2				1402	4645;13259	True;True	5012;14258	12381;35777	12174;35822	12174;35822
Q13443	ADAM9	Disintegrin and metalloproteinase domain-containing protein 9 OS=Homo sapiens GN=ADAM9 PE=1 SV=1	Disintegrin and metalloproteinase domain-containing protein 9	4	4	4	1	4	4	4	0	4	0	4	0	4	8.5	8.5	8.5	90.555	819	819	0	28.187		By MS/MS	0	8.5	22149000	0	22149000	0	22149000	0	6	6				1582	2936;7926;13153;13709	True;True;True;True	3166;8546;14140;14733	8011;21105;21106;21107;35499;35500;35501;37121	7854;20812;35556;35557;35558;37220	7854;20812;35556;37220
P55265	ADAR	Double-stranded RNA-specific adenosine deaminase OS=Homo sapiens GN=ADAR PE=1 SV=4	Double-stranded RNA-specific adenosine deaminase	2	2	2	1	2	2	2	0	2	0	2	0	2	2.1	2.1	2.1	136.06	1226	1226	0.00041806	16.733		By MS/MS	0	2.1	3239300	0	3239300	0	3239300	0	2	2				1229	12245;18615	True;True	13162;20295	32990;32991;51082	33184;51263	33184;51263
O60503	ADCY9	Adenylate cyclase type 9 OS=Homo sapiens GN=ADCY9 PE=1 SV=4	Adenylate cyclase type 9	3	3	3	1	3	3	3	0	3	0	3	0	3	3.5	3.5	3.5	150.7	1353	1353	0	22.291		By MS/MS	0	3.5	2185500	0	2185500	0	2185500	0	4	4				237	8457;12264;22793	True;True;True	9117;13183;24817	22545;33053;33054;63031	22161;33233;33234;63299	22161;33234;63299
P35611	ADD1	Alpha-adducin OS=Homo sapiens GN=ADD1 PE=1 SV=2	Alpha-adducin	9;1	9;1	9;1	2	9	9	9	1	9	1	9	1	9	21.3	21.3	21.3	80.954	737	737;726	0	68.121	By matching	By MS/MS	1.1	21.3	122200000	183350	122010000	0	121470000	0	15	15				958	8535;10381;11471;14389;19189;21249;21511;22109;22771	True;True;True;True;True;True;True;True;True	9201;11171;12337;15605;15606;20919;23163;23442;24087;24794	22737;22738;27755;27756;30706;39170;39171;39172;39173;39174;52793;52794;58720;59387;61133;61134;62968	22335;27698;27699;30563;39253;39254;53091;53092;53093;58866;58867;59509;61312;61313;63244	22335;27698;30563;39253;53091;58866;59509;61313;63244	1121	383
Q9UEY8	ADD3	Gamma-adducin OS=Homo sapiens GN=ADD3 PE=1 SV=1	Gamma-adducin	8	8	8	1	8	8	8	1	8	1	8	1	8	14.4	14.4	14.4	79.154	706	706	0	97.353	By matching	By MS/MS	2	14.4	53872000	36526	53836000	0	47995000	0	15	15				2637	5972;8265;9687;10364;17163;19200;20512;21676	True;True;True;True;True;True;True;True	6445;8903;10426;11154;18738;20931;22348;22349;23619	15808;15809;22030;22031;22032;22033;25757;27719;47172;47173;52816;56501;56502;56503;59953;59954	15499;15500;21683;21684;21685;25603;27663;47363;47364;47365;53115;56843;56844;56845;60141	15499;21683;25603;27663;47364;53115;56844;60141	2245	375
P00325	ADH1B	Alcohol dehydrogenase 1B OS=Homo sapiens GN=ADH1B PE=1 SV=2;Alcohol dehydrogenase 1A OS=Homo sapiens GN=ADH1A PE=1 SV=2	Alcohol dehydrogenase 1B;Alcohol dehydrogenase 1A	18;11;8	18;11;8	17;11;8	3	18	18	17	0	18	0	18	0	17	63.7	63.7	57.3	39.854	375	375;375;375	0	248.97		By MS/MS	0	63.7	1307300000	0	1307300000	0	1306500000	0	49	49				395	288;1190;5609;5819;7145;8131;9548;10000;10001;10359;11135;11295;13689;14657;18731;20098;20751;21670	True;True;True;True;True;True;True;True;True;True;True;True;True;True;True;True;True;True	314;1294;6048;6281;7709;8764;10282;10753;10754;11149;11984;12150;14712;16005;20424;21900;22614;23612	830;831;3265;14899;14900;14901;14902;14903;14904;15425;15426;18968;18969;21676;25390;25391;25392;26658;26659;26660;26661;26662;27706;27707;27708;27709;29884;29885;29886;30287;37064;37065;37066;40191;40192;51453;51454;55334;55335;55336;55337;55338;55339;57238;57239;57240;59931;59932;59933;59934	855;856;3191;14631;14632;14633;14634;14635;14636;14637;14638;14639;15117;15118;18642;18643;18644;21373;25236;25237;25238;26611;26612;26613;27649;27650;27651;27652;27653;27654;27655;29826;29827;29828;30181;37156;40421;51623;55770;55771;55772;55773;55774;55775;57545;57546;60119;60120;60121;60122	855;3191;14633;15117;18644;21373;25237;26611;26612;27649;29828;30181;37156;40421;51623;55775;57545;60122
P11766	ADH5	Alcohol dehydrogenase class-3 OS=Homo sapiens GN=ADH5 PE=1 SV=4	Alcohol dehydrogenase class-3	15	15	15	1	15	15	15	5	15	5	15	5	15	49.5	49.5	49.5	39.724	374	374	0	209.59	By matching	By MS/MS	17.4	49.5	655860000	837080	655030000	2345700	645800000	0	39	39				589	277;739;842;5119;5120;8635;9621;10034;10035;10121;13848;15817;19117;20099;20148	True;True;True;True;True;True;True;True;True;True;True;True;True;True;True	302;801;802;912;5525;5526;9310;10359;10789;10790;10879;14881;17286;20843;21901;21954	801;802;803;2030;2031;2032;2033;2328;13581;13582;13583;13584;23008;23009;25596;25597;25598;26781;26782;26783;26784;26785;26786;27031;27032;37507;37508;37509;37510;43484;43485;43486;43487;52592;52593;55340;55341;55342;55343;55344;55345;55481;55482;55483;55484;55485;55486;55487	826;827;828;829;830;2031;2032;2033;2313;13360;13361;13362;22584;22585;25418;25419;26726;26727;26728;26729;26953;26954;37595;37596;43830;43831;52910;52911;55776;55777;55778;55779;55780;55781;55912;55913;55914;55915;55916	829;2032;2313;13360;13362;22584;25419;26726;26728;26954;37595;43830;52910;55780;55916	541	362
P55263	ADK	Adenosine kinase OS=Homo sapiens GN=ADK PE=1 SV=2	Adenosine kinase	16	16	16	1	16	16	16	1	16	1	16	1	16	63	63	63	40.545	362	362	0	143.78	By matching	By MS/MS	2.2	63	140920000	23935	140900000	0	138210000	0	30	30				1228	34;96;261;880;3038;5598;5856;6872;9843;10863;17761;18974;20029;20384;21152;22798	True;True;True;True;True;True;True;True;True;True;True;True;True;True;True;True	36;105;285;954;3274;6037;6322;7404;10587;11691;19388;20687;21828;22208;23048;23049;24822	106;107;269;270;271;761;762;2438;8235;14872;14873;15526;15527;18193;26252;26253;29064;29065;29066;48717;48718;52143;55150;55151;56142;56143;58419;58420;58421;58422;58423;63045;63046	113;114;306;307;308;309;310;311;789;2414;8106;14600;14601;15214;15215;15216;17877;26252;26253;28985;48899;52415;55574;55575;56508;56509;58604;58605;58606;58607;63319	113;311;789;2414;8106;14601;15214;17877;26253;28985;48899;52415;55575;56508;58607;63319	1415;1416	231;290
Q9NX46	ADPRHL2	Poly(ADP-ribose) glycohydrolase ARH3 OS=Homo sapiens GN=ADPRHL2 PE=1 SV=1	Poly(ADP-ribose) glycohydrolase ARH3	3	3	3	1	3	3	3	0	3	0	3	0	3	16.3	16.3	16.3	38.946	363	363	0	22.956		By MS/MS	0	16.3	4307600	0	4307600	0	4307600	0	3	3				2558	21;5094;19966	True;True;True	22;23;5498;21754	76;77;13520;54932	81;82;13303;55328	82;13303;55328	2200	6
P30566	ADSL	Adenylosuccinate lyase OS=Homo sapiens GN=ADSL PE=1 SV=2	Adenylosuccinate lyase	6	6	6	1	6	6	6	0	6	0	6	0	6	16.5	16.5	16.5	54.889	484	484	0	42.911		By MS/MS	0	16.5	33250000	0	33250000	0	33250000	0	7	7				905	128;11378;16086;16516;17919;21057	True;True;True;True;True;True	138;12239;17583;18045;19561;22940	356;357;30469;44298;44299;45437;49136;58127	393;30357;44637;45666;49299;49300;58338	393;30357;44637;45666;49300;58338
P30520	ADSS	Adenylosuccinate synthetase isozyme 2 OS=Homo sapiens GN=ADSS PE=1 SV=3	Adenylosuccinate synthetase isozyme 2	3	3	3	1	3	3	3	1	3	1	3	1	3	11	11	11	50.097	456	456	0	46.19	By matching	By MS/MS	3.9	11	28557000	30009	28527000	0	28527000	0	6	6				902	6827;11702;20540	True;True;True	7359;12587;22377	18088;18089;31505;31506;31507;31508;56593;56594;56595	17756;17757;31550;31551;56925;56926	17756;31550;56926
Q8N556	AFAP1	Actin filament-associated protein 1 OS=Homo sapiens GN=AFAP1 PE=1 SV=2	Actin filament-associated protein 1	4	4	4	1	4	4	4	0	4	0	4	0	4	9.2	9.2	9.2	80.724	730	730	0	37.99		By MS/MS	0	9.2	8283600	0	8283600	0	8283600	0	5	5				2028	4826;10773;14167;15022	True;True;True;True	5209;11594;15289;16418	12875;28856;28857;38490;38491;41212	12676;28798;38574;38575;41405	12676;28798;38575;41405
Q9Y4W6	AFG3L2	AFG3-like protein 2 OS=Homo sapiens GN=AFG3L2 PE=1 SV=2	AFG3-like protein 2	6	6	5	1	6	6	5	1	5	1	5	1	4	9.3	9.3	8.3	88.583	797	797	0	48.443	By MS/MS	By MS/MS	2	7.3	17321000	59330	17262000	0	17262000	1	9	10				2791	7441;11918;14788;16237;19993;21679	True;True;True;True;True;True	8028;12813;16169;17746;21785;23622;23623	19816;19817;32039;40634;44667;44668;55002;59958;59959;59960	19539;32038;40830;44995;44996;55386;60145;60146;60147;60148	19539;32038;40830;44995;55386;60145	2316	666
Q53H12	AGK	Acylglycerol kinase, mitochondrial OS=Homo sapiens GN=AGK PE=1 SV=2	Acylglycerol kinase, mitochondrial	6	6	6	1	6	6	6	0	6	0	6	0	6	21.3	21.3	21.3	47.137	422	422	0	47.815		By MS/MS	0	21.3	78812000	0	78812000	0	78812000	0	6	6				1811	4885;6028;7575;10434;14737;21373	True;True;True;True;True;True	5272;6504;8169;11228;16114;23295	13023;13024;13025;15953;20148;27905;40472;59054;59055	12809;15634;19820;27830;40677;59186	12809;15634;19820;27830;40677;59186
P35573	AGL	Glycogen debranching enzyme OS=Homo sapiens GN=AGL PE=1 SV=3	Glycogen debranching enzyme;4-alpha-glucanotransferase;Amylo-alpha-1,6-glucosidase	8	8	8	1	8	8	8	1	8	1	8	1	8	7.7	7.7	7.7	174.76	1532	1532	0	54.194	By matching	By MS/MS	0.8	7.7	27296000	12063	27284000	0	27284000	0	9	9				954	3333;11744;11968;12450;14861;17127;17429;17475	True;True;True;True;True;True;True;True	3598;12632;12865;13382;16250;18699;19023;19074	9004;31611;31612;32138;33498;40827;47089;47851;47852;47853;47948	8805;31643;31644;32137;33625;33626;41017;47292;48024;48115	8805;31644;32137;33625;41017;47292;48024;48115
Q9UKV8	AGO2	Protein argonaute-2 OS=Homo sapiens GN=AGO2 PE=1 SV=3	Protein argonaute-2	3	3	1	1	3	3	1	0	3	0	3	0	1	5.8	5.8	2	97.207	859	859	0	21.008		By MS/MS	0	5.8	9359800	0	9359800	0	9359800	0	3	3				2685	9341;17341;18482	True;True;True	10063;18926;20155	24840;47610;50635	24594;47777;50745	24594;47777;50745
Q99943	AGPAT1	1-acyl-sn-glycerol-3-phosphate acyltransferase alpha OS=Homo sapiens GN=AGPAT1 PE=1 SV=2	1-acyl-sn-glycerol-3-phosphate acyltransferase alpha	2	2	2	1	2	2	2	0	2	0	2	0	2	14.8	14.8	14.8	31.716	283	283	0	19.619		By MS/MS	0	14.8	20437000	0	20437000	0	20437000	0	5	5				2311	18975;21016	True;True	20688;22897	52144;52145;58023;58024	52416;52417;52418;52419;58243	52419;58243
O00116	AGPS	Alkyldihydroxyacetonephosphate synthase, peroxisomal OS=Homo sapiens GN=AGPS PE=1 SV=1	Alkyldihydroxyacetonephosphate synthase, peroxisomal	6	6	6	1	6	6	6	0	6	0	6	0	6	13.5	13.5	13.5	72.911	658	658	0	54.445		By MS/MS	0	13.5	18705000	0	18705000	0	18705000	0	8	8				61	239;6108;6243;6510;8089;19115	True;True;True;True;True;True	262;6590;6736;7023;8718;20841	678;679;16145;16146;16507;17172;21561;52588	707;708;15821;16190;16804;21269;52906;52907	708;15821;16190;16804;21269;52907
P23526	AHCY	Adenosylhomocysteinase OS=Homo sapiens GN=AHCY PE=1 SV=4	Adenosylhomocysteinase	14	14	14	1	14	14	14	3	14	3	14	3	14	36.1	36.1	36.1	47.716	432	432	0	166.25	By MS/MS	By MS/MS	8.8	36.1	559490000	183430	559310000	209870	528210000	2	28	30				813	887;1265;3324;6114;8090;10049;11220;14458;17105;19925;20069;21276;22076;22709	True;True;True;True;True;True;True;True;True;True;True;True;True;True	961;1375;3586;3587;6596;8719;10804;12072;15708;18674;21711;21868;23190;24050;24730	2458;2459;3500;3501;3502;8964;8965;8966;8967;8968;8969;16157;16158;21562;21563;21564;26826;26827;30106;30107;30108;30109;39424;39425;47028;47029;54834;54835;54836;55270;55271;55272;58790;58791;58792;61047;61048;62698;62699	2433;3399;8760;8761;8762;8763;15831;21270;21271;21272;21273;26757;26758;26759;30020;30021;30022;39536;47238;55248;55249;55250;55699;55700;58928;58929;61235;61236;62846;62847	2433;3399;8762;15831;21271;26757;30022;39536;47238;55248;55699;58929;61235;62847	929	127
O43865	AHCYL1	Putative adenosylhomocysteinase 2 OS=Homo sapiens GN=AHCYL1 PE=1 SV=2	Putative adenosylhomocysteinase 2	7	7	3	1	7	7	3	1	7	1	7	1	3	16.8	16.8	7.7	58.951	530	530	0	47.782	By matching	By MS/MS	1.5	16.8	49079000	47469	49032000	0	45939000	0	11	11				226	8107;11653;15480;16657;18109;21817;22524	True;True;True;True;True;True;True	8738;12532;12533;16923;18197;19764;23778;24524	21626;31288;31289;31290;42616;42617;45831;49638;60362;60363;60364;60365;60366;62135;62136	21329;31150;31151;31152;42968;42969;46008;49777;60549;60550;62270	21329;31151;42969;46008;49777;60550;62270	136	276
Q09666	AHNAK	Neuroblast differentiation-associated protein AHNAK OS=Homo sapiens GN=AHNAK PE=1 SV=2	Neuroblast differentiation-associated protein AHNAK	111	111	111	1	111	111	111	8	111	8	111	8	111	42	42	42	629.09	5890	5890	0	323.31	By MS/MS	By MS/MS	2.2	42	1258300000	233990	1258100000	277030	1238800000	1	189	190				1514	428;447;504;513;533;586;587;815;1674;1681;2271;2994;3425;5148;5183;5666;6351;6537;6796;6868;6869;7153;7190;7585;7590;7610;7639;7640;7647;7709;7710;7711;7712;7713;7714;7763;7872;7944;7967;7969;7971;8408;8428;8544;9037;9637;10113;10114;10578;10653;10654;10655;10656;11888;11889;11895;11903;12520;12524;12543;13038;13109;13120;13123;13315;14088;14181;14723;17193;18014;18172;19415;19457;20173;20174;201…	True;True;True;True;True;True;True;True;True;True;True;True;True;True;True;True;True;True;True;True;True;True;True;True;True;True;True;True;True;True;True;True;True;True;True;True;True;True;True;True;True;True;True;True;True;True;True;True;True;True;True;True;True;True;True;True;True;True;True;True;True;True;True;True;True;True;True;True;True;True;True;True;True;True;True;True;True;True;True;True…	469;490;557;566;586;643;644;884;1820;1828;2458;3228;3695;5554;5592;5593;6109;6854;7050;7326;7400;7401;7717;7757;8180;8181;8186;8206;8237;8238;8245;8309;8310;8311;8312;8313;8314;8370;8485;8564;8587;8589;8591;9061;9083;9084;9212;9734;10376;10870;10871;11381;11467;11468;11469;11470;12782;12783;12789;12798;13455;13461;13480;14019;14094;14105;14108;14319;15165;15312;15313;16096;18770;19663;19829;21169…	1235;1279;1280;1281;1282;1438;1439;1440;1456;1510;1511;1657;1658;1659;1660;1661;1662;1663;2268;2269;2270;4587;4606;4607;4608;6202;6203;8160;8161;8162;8163;9247;9248;13657;13658;13744;13745;13746;13747;15037;16808;16809;17251;18015;18016;18186;18187;18981;18982;19080;19081;19082;20171;20172;20173;20182;20183;20231;20385;20386;20387;20398;20399;20400;20401;20563;20564;20565;20566;20567;20568;20569;…	1259;1298;1299;1300;1453;1454;1470;1525;1526;1668;1669;1670;1671;2264;2265;2266;4429;4453;4454;4455;6091;6092;8037;8038;8039;8040;9019;9020;9021;13439;13516;13517;13518;13519;14752;14753;16504;16505;16881;17679;17870;17871;18654;18655;18743;19837;19838;19839;19846;19912;20166;20167;20178;20179;20329;20330;20331;20332;20333;20334;20335;20336;20337;20465;20689;20690;20848;20849;20850;20851;20918;20…	1259;1299;1454;1470;1525;1669;1671;2266;4429;4454;6091;8037;9019;13439;13516;14752;16505;16881;17679;17870;17871;18655;18743;19838;19846;19912;20166;20167;20179;20329;20330;20331;20332;20334;20337;20465;20690;20849;20918;20923;20925;22016;22091;22360;23789;25478;26938;26940;28195;28472;28473;28475;28476;31961;31964;31975;32006;33831;33844;33880;35267;35459;35480;35488;35981;38305;38634;40634;4745…	1721;1722;1723;1724	77;3510;5248;5494
Q8IVF2	AHNAK2	Protein AHNAK2 OS=Homo sapiens GN=AHNAK2 PE=1 SV=2	Protein AHNAK2	3	3	3	1	3	3	3	0	3	0	3	0	3	3	3	3	616.62	5795	5795	0	28.444		By MS/MS	0	3	4941500	0	4941500	0	4941500	0	4	4				1991	811;6418;11887	True;True;True	880;6926;12781	2239;16943;31963	2234;16611;16612;31960	2234;16611;31960
Q96BJ3	AIDA	Axin interactor, dorsalization-associated protein OS=Homo sapiens GN=AIDA PE=1 SV=1	Axin interactor, dorsalization-associated protein	5	5	5	1	5	5	5	0	5	0	5	0	5	26.1	26.1	26.1	35.023	306	306	0	84.777		By MS/MS	0	26.1	21990000	0	21990000	0	21990000	0	8	8				2182	3743;5138;7380;7394;16899	True;True;True;True;True	4028;5544;7960;7976;18456	10026;10027;10028;13625;19657;19694;19695;46438;46439	9741;9742;9743;13408;19373;19406;46592;46593;46594	9741;13408;19373;19406;46592
O95831	AIFM1	Apoptosis-inducing factor 1, mitochondrial OS=Homo sapiens GN=AIFM1 PE=1 SV=1	Apoptosis-inducing factor 1, mitochondrial	4	4	4	1	4	4	4	0	4	0	4	0	4	10	10	10	66.9	613	613	0	28.513		By MS/MS	0	10	9185500	0	9185500	0	9185500	0	5	5				380	179;11395;12944;18993	True;True;True;True	194;12258;13918;20708	497;30522;30523;34926;52198	519;30411;34988;52467;52468	519;30411;34988;52467
Q9Y4K1	AIM1	Absent in melanoma 1 protein OS=Homo sapiens GN=AIM1 PE=1 SV=3	Absent in melanoma 1 protein	2	2	2	1	2	2	2	0	2	0	2	0	2	1.5	1.5	1.5	188.67	1723	1723	0.0031825	10.761		By MS/MS	0	1.5	5330800	0	5330800	0	5330800	0	2	2				2785	10639;15168	True;True	11450;16576	28480;41585;41586	28437;41769	28437;41769
Q12904	AIMP1	Aminoacyl tRNA synthase complex-interacting multifunctional protein 1 OS=Homo sapiens GN=AIMP1 PE=1 SV=2	Aminoacyl tRNA synthase complex-interacting multifunctional protein 1;Endothelial monocyte-activating polypeptide 2	7	7	7	1	7	7	7	0	7	0	7	0	7	35.6	35.6	35.6	34.352	312	312	0	51.884		By MS/MS	0	35.6	21928000	0	21928000	0	21928000	0	11	11				1531	1641;7404;8805;10733;10940;11187;16542	True;True;True;True;True;True;True	1787;7987;9488;11551;11772;12037;18072	4521;19721;19722;23480;28731;29307;29308;30020;30021;45496;45497	4369;19440;19441;19442;23031;28673;29240;29241;29944;29945;45717	4369;19442;23031;28673;29240;29945;45717
Q13155	AIMP2	Aminoacyl tRNA synthase complex-interacting multifunctional protein 2 OS=Homo sapiens GN=AIMP2 PE=1 SV=2	Aminoacyl tRNA synthase complex-interacting multifunctional protein 2	4	4	4	1	4	4	4	0	4	0	4	0	4	20	20	20	35.348	320	320	0	39.711		By MS/MS	0	20	34707000	0	34707000	0	34707000	0	13	13				1555	6905;7142;17031;18555	True;True;True;True	7440;7706;18596;20233	18309;18963;18964;18965;46853;46854;50857;50858	17994;18634;18635;18636;18637;18638;18639;47056;47057;47058;50978;50979;50980	17994;18635;47058;50978
O00170	AIP	AH receptor-interacting protein OS=Homo sapiens GN=AIP PE=1 SV=2	AH receptor-interacting protein	3	3	3	1	3	3	3	0	3	0	3	0	3	13	13	13	37.636	330	330	0	21.281		By MS/MS	0	13	3411800	0	3411800	0	3411800	0	6	6				68	19245;20364;22943	True;True;True	20978;22187;24974	52926;52927;56081;63402;63403	53210;53211;53212;53213;56445;63665	53211;56445;63665
P00568	AK1	Adenylate kinase isoenzyme 1 OS=Homo sapiens GN=AK1 PE=1 SV=3	Adenylate kinase isoenzyme 1	9	9	8	1	9	9	8	2	9	2	9	2	8	57.7	57.7	53.1	21.635	194	194	0	65.368	By MS/MS	By MS/MS	11.9	57.7	264730000	120350	264610000	127560	261680000	2	21	23				408	2104;6425;7830;8482;9936;10026;11401;21168;22458	True;True;True;True;True;True;True;True;True	2275;6933;8441;9143;10685;10686;10780;12264;23075;24455	5742;5743;5744;5745;16964;20867;20868;22597;22598;22599;22600;26509;26510;26511;26512;26732;26733;26734;26735;26736;26737;30533;30534;58482;58483;61979	5663;5664;16630;20599;20600;22204;22205;22206;22207;26471;26472;26473;26474;26475;26674;26675;26676;26677;26678;26679;30422;30423;58658;62105	5663;16630;20600;22204;26471;26677;30423;58658;62105	249	125
P54819	AK2	Adenylate kinase 2, mitochondrial OS=Homo sapiens GN=AK2 PE=1 SV=2	Adenylate kinase 2, mitochondrial;Adenylate kinase 2, mitochondrial, N-terminally processed	4	4	4	1	4	4	4	0	4	0	4	0	4	19.7	19.7	19.7	26.477	239	239	0	27.446		By MS/MS	0	19.7	19685000	0	19685000	0	19685000	0	3	3				1218	5488;11778;13152;13846	True;True;True;True	5921;12667;14139;14879	14602;14603;31699;35498;37502;37503	14358;31730;35555;37593	14358;31730;35555;37593
Q9UIJ7	AK3	GTP:AMP phosphotransferase AK3, mitochondrial OS=Homo sapiens GN=AK3 PE=1 SV=4	GTP:AMP phosphotransferase AK3, mitochondrial	3	3	3	1	3	3	3	0	3	0	3	0	3	18.5	18.5	18.5	25.565	227	227	0	69.014		By MS/MS	0	18.5	26791000	0	26791000	0	26791000	0	3	3				2665	2475;2506;9200	True;True;True	2672;2706;9910	6732;6733;6734;6735;6850;6851;24499	6568;6569;6716;24249	6568;6716;24249
P27144	AK4	Adenylate kinase 4, mitochondrial OS=Homo sapiens GN=AK4 PE=1 SV=1	Adenylate kinase 4, mitochondrial	4	4	4	1	4	4	4	0	4	0	4	0	4	18.8	18.8	18.8	25.268	223	223	0	21.581		By MS/MS	0	18.8	7591600	0	7591600	0	7591600	0	4	4				850	2309;4368;8466;12910	True;True;True;True	2500;4719;9126;13874	6312;6313;11713;11714;22560;34814;34815	6197;11525;22173;34901	6197;11525;22173;34901
Q9UKA4	AKAP11	A-kinase anchor protein 11 OS=Homo sapiens GN=AKAP11 PE=1 SV=1	A-kinase anchor protein 11	2	2	2	1	2	2	2	0	2	0	2	0	2	0.6	0.6	0.6	210.51	1901	1901	0.0035286	10.652		By MS/MS	0	0.6	6859900	0	6859900	0	6859900	0	0	0				2678	2115;14046	True;True	2287;15103	5768;38084	5686;38171	5686;38171	2261;2262	1;9
Q02952	AKAP12	A-kinase anchor protein 12 OS=Homo sapiens GN=AKAP12 PE=1 SV=4	A-kinase anchor protein 12	20	20	20	1	20	20	20	0	20	0	20	0	20	20.9	20.9	20.9	191.48	1782	1782	0	271.85		By MS/MS	0	20.9	51844000	0	51844000	0	51844000	0	34	34				1462	492;3072;4876;5075;5472;6040;6193;7755;8139;8626;11055;12514;16929;17005;17085;17200;18155;18840;18850;20804	True;True;True;True;True;True;True;True;True;True;True;True;True;True;True;True;True;True;True;True	545;3308;5263;5479;5904;6518;6685;8361;8772;9300;11900;13449;18487;18567;18652;18777;19811;20542;20552;22671	1414;8308;8309;13004;13005;13477;13478;14565;15979;15980;16385;20697;20698;21690;21691;22986;22987;29668;33685;33686;33687;33688;46531;46532;46787;46788;46981;47282;49742;51791;51807;57396;57397	1433;1434;8177;12792;12793;13262;13263;14326;15657;15658;15659;16078;20450;20451;21385;21386;22565;29621;33820;33821;33822;33823;46703;46704;46705;46998;46999;47193;47474;47475;49872;52050;52067;57702	1433;8177;12792;13262;14326;15659;16078;20451;21386;22565;29621;33822;46705;46998;47193;47475;49872;52050;52067;57702
P14550	AKR1A1	Alcohol dehydrogenase [NADP(+)] OS=Homo sapiens GN=AKR1A1 PE=1 SV=3	Alcohol dehydrogenase [NADP(+)]	10	10	10	1	10	10	10	5	10	5	10	5	10	40.9	40.9	40.9	36.573	325	325	0	90.763	By MS/MS	By MS/MS	21.5	40.9	145400000	356130	145050000	1390800	142620000	2	21	23				634	240;2458;2833;3984;7613;8181;9128;14745;16228;20401	True;True;True;True;True;True;True;True;True;True	263;2654;3054;4309;8209;8815;9832;16122;17737;22226;22227	680;681;682;683;6692;6693;6694;7717;7718;10743;10744;10745;10746;10747;10748;20235;21792;21793;21794;21795;21796;24323;24324;40490;40491;44652;44653;44654;56187;56188;56189;56190	709;710;6537;6538;6539;7566;7567;10520;10521;10522;10523;10524;10525;19915;21489;21490;21491;23999;24000;24001;40693;40694;44983;56554;56555	710;6538;7566;10525;19915;21491;23999;40694;44983;56555	599	286
P15121	AKR1B1	Aldose reductase OS=Homo sapiens GN=AKR1B1 PE=1 SV=3	Aldose reductase	13;1	13;1	13;1	2	13	13	13	2	13	2	13	2	13	63	63	63	35.853	316	316;344	0	105.31	By matching	By MS/MS	4.7	63	294570000	193090	294370000	224920	294340000	0	21	21				644	1091;4582;5115;9129;13905;15281;16802;18002;19289;19645;19979;20400;22522	True;True;True;True;True;True;True;True;True;True;True;True;True	1188;4943;5521;9833;14945;16695;18354;19651;21029;21411;21770;22225;24522	3012;12203;12204;12205;13573;13574;24325;24326;24327;37712;41962;41963;41964;41965;41966;46207;49361;53070;54073;54074;54075;54967;54968;54969;56183;56184;56185;56186;62126;62127	2967;11990;13355;24002;24003;24004;24005;24006;37813;42259;42260;46377;49520;53362;54407;54408;55358;55359;56551;56552;56553;62264	2967;11990;13355;24003;37813;42260;46377;49520;53362;54408;55359;56551;62264
Q04828	AKR1C1	Aldo-keto reductase family 1 member C1 OS=Homo sapiens GN=AKR1C1 PE=1 SV=1;Aldo-keto reductase family 1 member C2 OS=Homo sapiens GN=AKR1C2 PE=1 SV=3	Aldo-keto reductase family 1 member C1;Aldo-keto reductase family 1 member C2	11;8;3	11;8;3	6;6;0	3	11	11	6	2	11	2	11	0	6	49.5	49.5	32.2	36.788	323	323;323;323	0	173.04	By matching	By MS/MS	5.3	49.5	357240000	76827	357160000	92135	329330000	0	29	29				1480	3527;5063;9132;11510;12942;15246;16333;16475;16797;17632;19399	True;True;True;True;True;True;True;True;True;True;True	3801;5467;9836;12376;13915;13916;16659;17844;18001;18002;18348;19248;21153	9510;13453;13454;13455;13456;13457;24330;30815;30816;30817;30818;34917;34918;34919;34920;34921;34922;41780;44952;44953;45342;45343;45344;45345;45346;45347;45348;45349;46192;46193;46194;48391;53415;53416	9291;13237;13238;13239;13240;13241;24009;30697;34979;34980;34981;34982;34983;34984;34985;41961;41962;45248;45249;45575;45576;45577;45578;45579;45580;46365;46366;48616;53753;53754	9291;13241;24009;30697;34982;41961;45248;45579;46365;48616;53753	1695;1696	16;293
P42330	AKR1C3	Aldo-keto reductase family 1 member C3 OS=Homo sapiens GN=AKR1C3 PE=1 SV=4	Aldo-keto reductase family 1 member C3	7	2	2	1	7	2	2	2	7	0	2	0	2	30.3	13	13	36.853	323	323	0.00041051	15.781	By matching	By MS/MS	5.3	30.3	10371000	0	10371000	0	10371000	0	2	2				1021	9132;11510;15191;16333;16797;19399;22150	False;False;True;False;False;False;True	9836;12376;16600;17844;18348;21153;24130	24330;30815;30816;30817;30818;41639;44952;44953;46192;46193;46194;53415;53416;61216	24009;30697;41827;45248;45249;46365;46366;53753;53754;61385	24009;30697;41827;45248;46365;53753;61385
O43488	AKR7A2	Aflatoxin B1 aldehyde reductase member 2 OS=Homo sapiens GN=AKR7A2 PE=1 SV=3	Aflatoxin B1 aldehyde reductase member 2	5;2;1	5;2;1	5;2;1	3	5	5	5	3	5	3	5	3	5	18.9	18.9	18.9	39.589	359	359;331;331	0	50.477	By MS/MS	By MS/MS	12.5	18.9	86343000	209240	86134000	491950	85851000	1	10	11				194	1440;5319;7336;14061;16665	True;True;True;True;True	1560;5744;7914;15123;18205	3998;3999;4000;4001;4002;14116;19521;19522;19523;19524;19525;38123;38124;38125;45846;45847	3862;3863;3864;3865;13859;19221;19222;38216;38217;38218;46025	3865;13859;19222;38218;46025
P31749	AKT1	RAC-alpha serine/threonine-protein kinase OS=Homo sapiens GN=AKT1 PE=1 SV=2	RAC-alpha serine/threonine-protein kinase	3;1	2;0	2;0	2	3	2	2	0	3	0	2	0	2	9.6	5.2	5.2	55.686	480	480;479	0.00074991	12.809		By MS/MS	0	9.6	2210600	0	2210600	0	2210600	0	2	2				917	4767;14851;18911	True;True;False	5145;16240;20623	12726;40809;51968	12515;41003;52227	12515;41003;52227
P31751	AKT2	RAC-beta serine/threonine-protein kinase OS=Homo sapiens GN=AKT2 PE=1 SV=2	RAC-beta serine/threonine-protein kinase	6	6	5	1	6	6	5	0	6	0	6	0	5	19.1	19.1	14.8	55.768	481	481	0	38.656		By MS/MS	0	19.1	19695000	0	19695000	0	19695000	0	5	5				918	1144;2619;3125;7346;14486;18911	True;True;True;True;True;True	1246;2825;3371;7924;15754;20623	3162;3163;7102;8449;19547;39519;51968	3094;6948;8305;19239;39616;52227	3094;6948;8305;19239;39616;52227	1036	1
P13716	ALAD	Delta-aminolevulinic acid dehydratase OS=Homo sapiens GN=ALAD PE=1 SV=1	Delta-aminolevulinic acid dehydratase	2	2	2	1	2	2	2	0	2	0	2	0	2	14.5	14.5	14.5	36.294	330	330	0.00080096	14.621		By MS/MS	0	14.5	10327000	0	10327000	0	10327000	0	5	5				621	2457;11496	True;True	2653;12362	6689;6690;6691;30778;30779	6534;6535;6536;30668;30669	6534;30668
Q13740	ALCAM	CD166 antigen OS=Homo sapiens GN=ALCAM PE=1 SV=2	CD166 antigen	13	13	13	1	13	13	13	0	13	0	13	0	13	34.8	34.8	34.8	65.102	583	583	0	137.47		By MS/MS	0	34.8	291730000	0	291730000	0	287160000	0	31	31				1615	436;1328;1329;3677;5784;6119;7260;16241;18240;19109;19110;20943;22315	True;True;True;True;True;True;True;True;True;True;True;True;True	479;1444;1445;3956;6232;6233;6603;7829;17750;19904;20835;20836;22821;24307	1253;3677;3678;3679;9872;15304;15305;15306;15307;15308;15309;15310;16174;16175;19302;19303;44676;44677;44678;49948;49949;49950;52569;52570;52571;52572;52573;57820;61634;61635	1275;3554;3555;9601;15000;15001;15002;15003;15004;15005;15006;15844;15845;19005;45001;45002;50075;50076;50077;50078;50079;52890;52891;52892;52893;52894;52895;52896;58060;61785;61786	1275;3554;3555;9601;15002;15844;19005;45001;50078;52891;52896;58060;61785	1768	192
Q8IZ83	ALDH16A1	Aldehyde dehydrogenase family 16 member A1 OS=Homo sapiens GN=ALDH16A1 PE=1 SV=2	Aldehyde dehydrogenase family 16 member A1	7	7	7	1	7	7	7	0	7	0	7	0	7	14.5	14.5	14.5	85.126	802	802	0	62.062		By MS/MS	0	14.5	48288000	0	48288000	0	48288000	0	9	9				2013	5379;7373;7947;8159;12710;12878;15540	True;True;True;True;True;True;True	5807;7952;8567;8793;13658;13834;16988	14275;19636;19637;21157;21749;21750;34225;34226;34728;42755	14009;14010;19346;20858;21452;34290;34822;43100;43101	14009;19346;20858;21452;34290;34822;43100
P54886	ALDH18A1	Delta-1-pyrroline-5-carboxylate synthase OS=Homo sapiens GN=ALDH18A1 PE=1 SV=2	Delta-1-pyrroline-5-carboxylate synthase;Glutamate 5-kinase;Gamma-glutamyl phosphate reductase	14	14	14	1	14	14	14	0	14	0	14	0	14	27.3	27.3	27.3	87.301	795	795	0	137.73		By MS/MS	0	27.3	87883000	0	87883000	0	82004000	0	25	25				1219	601;3080;5782;5801;8118;11576;12268;12394;14334;14494;15223;18761;20598;21479	True;True;True;True;True;True;True;True;True;True;True;True;True;True	659;3316;6230;6255;8749;12446;13187;13321;15526;15764;16635;20457;22439;22440;23408	1712;8322;15302;15378;21648;21649;31017;31018;31019;31020;33059;33354;33355;38981;39533;39534;41720;51541;51542;51543;51544;51545;56763;56764;56765;56766;59321	1719;8190;14998;15080;21347;21348;30901;30902;33239;33511;33512;33513;39069;39628;41898;51711;51712;51713;51714;51715;51716;57100;57101;57102;57103;59448	1719;8190;14998;15080;21347;30902;33239;33513;39069;39628;41898;51713;57103;59448	1396	369
P00352	ALDH1A1	Retinal dehydrogenase 1 OS=Homo sapiens GN=ALDH1A1 PE=1 SV=2	Retinal dehydrogenase 1	28;1;1	28;1;1	26;0;0	3	28	28	26	13	27	13	27	12	25	70.3	70.3	67.3	54.861	501	501;512;518	0	311.69	By MS/MS	By MS/MS	32.3	70.3	1214900000	2924400	1212000000	6451800	1167500000	14	93	107				397	1647;4690;5016;5610;7044;8914;9455;9811;9846;9923;10153;10154;11133;11472;11833;12726;13993;15736;15933;17672;17673;17963;18252;19960;21641;22218;22494;22495	True;True;True;True;True;True;True;True;True;True;True;True;True;True;True;True;True;True;True;True;True;True;True;True;True;True;True;True	1793;5059;5060;5411;5412;6049;7599;9603;9604;10183;10184;10553;10590;10672;10912;10913;11982;12338;12725;13675;13676;13677;15033;17202;17415;19292;19293;19609;19917;21748;23580;24202;24493;24494	4532;4533;4534;4535;12506;12507;12508;12509;12510;13334;13335;13336;13337;13338;13339;13340;13341;14905;14906;14907;18691;18692;18693;23797;23798;23799;23800;23801;23802;23803;23804;25133;25134;25135;25136;25137;26159;26160;26161;26261;26262;26263;26264;26470;26471;27117;27118;27119;27120;27121;27122;27123;29878;29879;29880;29881;30707;30708;30709;30710;30711;31822;31823;31824;31825;34262;34263;3…	4378;4379;4380;4381;12293;12294;12295;12296;12297;12298;12299;12300;12301;12302;12303;13116;13117;13118;13119;13120;13121;13122;13123;13124;13125;13126;13127;14640;14641;18345;18346;18347;18348;23372;23373;23374;23375;23376;23377;23378;24965;24966;24967;24968;24969;24970;26144;26145;26146;26147;26262;26263;26264;26265;26266;26438;26439;27050;27051;27052;27053;29818;29819;29820;29821;29822;29823;3…	4381;12298;13120;14640;18347;23376;24968;26147;26263;26439;27051;27053;29823;30564;31846;34337;38013;43658;44233;48698;48699;49406;50097;55318;60007;61543;62198;62203	221;222;223;224;225	106;109;237;394;409
P30837	ALDH1B1	Aldehyde dehydrogenase X, mitochondrial OS=Homo sapiens GN=ALDH1B1 PE=1 SV=3	Aldehyde dehydrogenase X, mitochondrial	7	6	6	1	7	6	6	2	7	2	6	2	6	20.3	18.8	18.8	57.206	517	517	0	61.491	By matching	By MS/MS	6.2	20.3	48897000	37597	48859000	191110	45988000	0	10	10				910	5015;11362;11546;19950;20565;20941;21641	True;True;True;True;True;True;False	5410;12222;12415;12416;21738;22403;22819;23580	13332;13333;30433;30920;30921;30922;54890;54891;54892;56671;56672;56673;57815;57816;57817;59828	13114;13115;30323;30808;30809;30810;55293;57020;57021;58057;60007	13115;30323;30809;55293;57020;58057;60007	1030	208
Q3SY69	ALDH1L2	Mitochondrial 10-formyltetrahydrofolate dehydrogenase OS=Homo sapiens GN=ALDH1L2 PE=1 SV=2	Mitochondrial 10-formyltetrahydrofolate dehydrogenase	16	16	16	1	16	16	16	1	16	1	16	1	16	24.8	24.8	24.8	101.74	923	923	0	170.3	By matching	By MS/MS	1.7	24.8	64633000	16968	64616000	0	64616000	0	24	24				1797	477;1596;3667;5076;5170;5826;7085;8787;9872;11813;15772;17027;18432;18790;20782;21577	True;True;True;True;True;True;True;True;True;True;True;True;True;True;True;True	525;1739;3946;5480;5578;6290;7646;9469;10618;12705;17240;18592;20102;20491;22645;23515	1369;1370;4422;9847;9848;13479;13713;13714;15450;15451;18803;18804;23429;23430;23431;26332;31782;31783;31784;43376;46848;50483;50484;51664;57333;57334;57335;57336;59596;59597	1384;4280;9578;13264;13265;13486;13487;15142;15143;18459;22988;22989;26321;31801;31802;43738;47051;50599;51900;57645;57646;57647;59728;59729	1384;4280;9578;13264;13487;15142;18459;22989;26321;31801;43738;47051;50599;51900;57647;59728	1938	831
P05091	ALDH2	Aldehyde dehydrogenase, mitochondrial OS=Homo sapiens GN=ALDH2 PE=1 SV=2	Aldehyde dehydrogenase, mitochondrial	19	17	17	1	19	17	17	2	19	1	17	1	17	58.4	55.5	55.5	56.381	517	517	0	158.29	By matching	By MS/MS	2.9	58.4	178600000	90361	178510000	0	178510000	0	26	26				447	117;1646;3613;4689;5013;5611;8912;9043;11361;11472;12248;12576;18879;18959;19093;19951;19959;20761;21641	True;True;True;True;True;True;True;True;True;False;True;True;True;True;True;True;True;True;False	127;1792;3890;5058;5408;6050;9600;9743;12221;12338;13165;13513;20585;20672;20817;21739;21747;22624;23580	328;329;4529;4530;4531;9719;12504;12505;13327;13328;14908;14909;23791;23792;24171;30431;30432;30707;30708;30709;30710;30711;33000;33001;33837;33838;51874;52100;52101;52511;52512;54893;54894;54895;54896;54897;54919;57260;57261;59828	364;4375;4376;4377;9469;12290;12291;12292;13109;14642;23367;23815;30321;30322;30564;30565;30566;33190;33191;33960;52130;52382;52383;52840;55294;55295;55296;55317;57566;57567;60007	364;4376;9469;12291;13109;14642;23367;23815;30321;30564;33190;33960;52130;52383;52840;55296;55317;57566;60007	305	208
P51648	ALDH3A2	Fatty aldehyde dehydrogenase OS=Homo sapiens GN=ALDH3A2 PE=1 SV=1	Fatty aldehyde dehydrogenase	5	5	4	1	5	5	4	0	5	0	5	0	4	14.4	14.4	12	54.847	485	485	0	34.181		By MS/MS	0	14.4	23484000	0	23484000	0	21200000	0	8	8				1162	5466;6611;9204;21153;22479	True;True;True;True;True	5898;7128;9914;23050;23051;24478	14555;17445;17446;24507;58424;58425;58426;58427;58428;62031	14316;17076;17077;24256;58608;58609;58610;62166	14316;17077;24256;58609;62166	1358	328
P43353	ALDH3B1	Aldehyde dehydrogenase family 3 member B1 OS=Homo sapiens GN=ALDH3B1 PE=1 SV=1;Aldehyde dehydrogenase family 3 member B2 OS=Homo sapiens GN=ALDH3B2 PE=2 SV=3	Aldehyde dehydrogenase family 3 member B1;Aldehyde dehydrogenase family 3 member B2	3;2;1	2;1;0	2;1;0	3	3	2	2	0	3	0	2	0	2	7.9	5.3	5.3	51.839	468	468;385;453	0.00076834	13.353		By MS/MS	0	7.9	2545800	0	2545800	0	2545800	0	3	3				1043	7347;9204;12785	True;False;True	7925;9914;13739	19548;24507;34436;34437	19240;19241;24256;34497	19240;24256;34497
P30038	ALDH4A1	Delta-1-pyrroline-5-carboxylate dehydrogenase, mitochondrial OS=Homo sapiens GN=ALDH4A1 PE=1 SV=3	Delta-1-pyrroline-5-carboxylate dehydrogenase, mitochondrial	5	5	5	1	5	5	5	0	5	0	5	0	5	16	16	16	61.719	563	563	0	45.25		By MS/MS	0	16	38240000	0	38240000	0	38240000	0	6	6				882	14003;14136;16923;20011;20499	True;True;True;True;True	15043;15242;18481;21810;22335	37953;38404;46523;55063;55064;56463;56464;56465;56466	38042;38493;46694;55448;56809;56810	38042;38493;46694;55448;56809	1010	61
Q02252	ALDH6A1	Methylmalonate-semialdehyde dehydrogenase [acylating], mitochondrial OS=Homo sapiens GN=ALDH6A1 PE=1 SV=2	Methylmalonate-semialdehyde dehydrogenase [acylating], mitochondrial	7	7	7	1	7	7	7	0	7	0	7	0	7	21.3	21.3	21.3	57.839	535	535	0	54.275		By MS/MS	0	21.3	23741000	0	23741000	0	23741000	0	7	7				1455	640;4975;16167;19180;21170;22049;22191	True;True;True;True;True;True;True	699;5366;17670;20910;23077;24020;24171	1797;13226;44524;44525;52765;52766;58488;60992;61301	1797;13007;44865;53069;58662;61180;61461	1797;13007;44865;53069;58662;61180;61461
P49419	ALDH7A1	Alpha-aminoadipic semialdehyde dehydrogenase OS=Homo sapiens GN=ALDH7A1 PE=1 SV=5	Alpha-aminoadipic semialdehyde dehydrogenase	15	15	15	1	15	15	15	2	15	2	15	2	15	39.9	39.9	39.9	58.486	539	539	0	108.5	By matching	By MS/MS	4.5	39.9	258800000	104710	258700000	114680	258690000	0	24	24				1104	3758;5054;6870;7471;7766;10933;14342;14914;15966;16177;18298;20566;20880;21134;21222	True;True;True;True;True;True;True;True;True;True;True;True;True;True;True	4047;5457;7402;8061;8373;11765;15538;16309;17452;17680;19963;22404;22753;23021;23132	10065;13435;13436;18188;18189;18190;18191;19902;19903;19904;20720;20721;29293;29294;39012;39013;40967;43984;44546;44547;44548;44549;50098;56674;56675;56676;56677;57649;58332;58624;58625;58626;58627;58628	9773;13223;17872;17873;17874;17875;19612;19613;20472;29230;29231;39112;41154;44320;44891;50217;57022;57023;57024;57025;57916;58537;58784;58785	9773;13223;17875;19612;20472;29231;39112;41154;44320;44891;50217;57025;57916;58537;58785	1300	261
P49189	ALDH9A1	4-trimethylaminobutyraldehyde dehydrogenase OS=Homo sapiens GN=ALDH9A1 PE=1 SV=3	4-trimethylaminobutyraldehyde dehydrogenase	13	13	13	1	13	13	13	2	13	2	13	2	13	33.8	33.8	33.8	53.801	494	494	0	132.43	By MS/MS	By MS/MS	5.1	33.8	144880000	79625	144800000	108220	143730000	1	23	24				1097	1609;4872;5014;5396;6407;9873;10229;17996;18322;20674;20849;21478;21634	True;True;True;True;True;True;True;True;True;True;True;True;True	1754;5259;5409;5824;6914;10619;10992;19644;19645;19987;22522;22721;23407;23573	4453;4454;4455;13000;13329;13330;13331;14309;14310;16916;16917;26333;26334;26335;27333;27334;49344;49345;49346;49347;50167;50168;56954;56955;57555;57556;57557;59319;59320;59802;59803;59804;59805;59806;59807	4305;4306;4307;12788;13110;13111;13112;13113;14036;16586;26322;26323;27282;49504;49505;49506;50291;50292;57288;57289;57821;57822;59446;59447;59982;59983;59984	4307;12788;13111;14036;16586;26323;27282;49504;50292;57289;57821;59447;59982	1273	269
P04075	ALDOA	Fructose-bisphosphate aldolase A OS=Homo sapiens GN=ALDOA PE=1 SV=2	Fructose-bisphosphate aldolase A	24;1	24;1	19;0	2	24	24	19	11	24	11	24	10	19	83.8	83.8	70.3	39.42	364	364;364	0	321.81	By MS/MS	By MS/MS	42.9	83.8	3120100000	1986000	3118100000	5512000	2958900000	7	123	130				428	227;376;1226;1442;1479;2718;3229;5740;7138;8061;8862;9884;13294;13295;15903;15904;16371;19823;20197;20823;21237;22204;22205;22866	True;True;True;True;True;True;True;True;True;True;True;True;True;True;True;True;True;True;True;True;True;True;True;True	250;411;1333;1562;1600;2932;3483;6187;7701;7702;8686;9549;10630;10631;14298;14299;17383;17384;17883;21602;22008;22692;23150;24186;24187;24893	646;647;1098;1099;1100;1101;3357;3358;3359;3360;3361;3362;4004;4005;4006;4007;4093;7414;8705;8706;8707;15202;15203;15204;18951;18952;18953;18954;18955;18956;18957;21449;21450;21451;21452;21453;21454;21455;21456;21457;23665;23666;23667;23668;23669;23670;23671;23672;26353;26354;26355;26356;26357;26358;26359;26360;35897;35898;35899;35900;35901;43774;43775;43776;43777;43778;45056;45057;45058;45059;54…	670;671;1140;3257;3258;3259;3260;3261;3262;3869;3870;3954;7295;8519;8520;14902;14903;14904;18621;18622;18623;18624;18625;18626;18627;18628;18629;21119;21120;21121;21122;21123;21124;21125;21126;21127;21128;21129;23256;23257;23258;23259;23260;23261;26337;26338;26339;26340;26341;26342;26343;26344;35933;35934;35935;44127;44128;44129;44130;44131;44132;44133;45338;45339;45340;54932;54933;54934;54935;54…	671;1140;3260;3870;3954;7295;8520;14904;18625;21127;23258;26340;35933;35935;44130;44133;45338;54969;56011;57743;58816;61509;61514;63445	260;261	165;251
P09972	ALDOC	Fructose-bisphosphate aldolase C OS=Homo sapiens GN=ALDOC PE=1 SV=2	Fructose-bisphosphate aldolase C	12	7	7	1	12	7	7	2	12	1	7	1	7	38.7	25.3	25.3	39.455	364	364	0	70.68	By MS/MS	By MS/MS	8.2	38.7	183800000	402530	183400000	389440	142570000	2	22	24				556	1443;2718;3229;3889;8062;8861;15791;19454;20196;20823;22204;22205	True;False;False;True;True;True;True;True;True;False;False;False	1563;2932;3483;4203;8687;8688;9548;17260;21211;22007;22692;24186;24187	4008;7414;8705;8706;8707;10475;21458;21459;21460;21461;23651;23652;23653;23654;23655;23656;23657;23658;23659;23660;23661;23662;23663;23664;43420;43421;53573;53574;55594;57452;57453;57454;57455;61346;61347;61348;61349;61350;61351;61352;61353	3871;7295;8519;8520;10250;21130;21131;21132;21133;21134;23243;23244;23245;23246;23247;23248;23249;23250;23251;23252;23253;23254;23255;43774;43775;53902;56010;57743;57744;61508;61509;61510;61511;61512;61513;61514;61515	3871;7295;8520;10250;21131;23247;43774;53902;56010;57743;61509;61514	504	40
Q9BT22	ALG1	Chitobiosyldiphosphodolichol beta-mannosyltransferase OS=Homo sapiens GN=ALG1 PE=1 SV=2	Chitobiosyldiphosphodolichol beta-mannosyltransferase	5	5	5	1	5	5	5	0	5	0	5	0	5	14	14	14	52.518	464	464	0	32.868		By MS/MS	0	14	33280000	0	33280000	0	33280000	0	7	7				2335	2415;2838;4907;10507;22002	True;True;True;True;True	2610;3059;5296;11306;23971	6566;6567;7726;13073;28105;28106;60847;60848	6428;7576;7577;12851;28021;28022;61023	6428;7576;12851;28022;61023
Q9H553	ALG2	Alpha-1,3/1,6-mannosyltransferase ALG2 OS=Homo sapiens GN=ALG2 PE=1 SV=1	Alpha-1,3/1,6-mannosyltransferase ALG2	7	7	7	1	7	7	7	0	7	0	7	0	7	23.6	23.6	23.6	47.091	416	416	0	45.832		By MS/MS	0	23.6	58307000	0	58307000	0	58307000	0	9	9				2444	2535;7165;10945;15865;17836;17837;20637	True;True;True;True;True;True;True	2736;7730;11777;17343;19467;19468;22479	6910;19011;19012;29351;43660;48896;48897;48898;56854	6769;18680;29319;44046;49053;49054;49055;57176;57177	6769;18680;29319;44046;49054;49055;57177
Q9Y673	ALG5	Dolichyl-phosphate beta-glucosyltransferase OS=Homo sapiens GN=ALG5 PE=1 SV=1	Dolichyl-phosphate beta-glucosyltransferase	4	4	4	1	4	4	4	0	4	0	4	0	4	22.8	22.8	22.8	36.946	324	324	0	52.609		By MS/MS	0	22.8	7228400	0	7228400	0	7228400	0	4	4				2818	3977;8245;10244;10432	True;True;True;True	4301;8882;11008;11226	10707;21980;21981;27363;27901;27902	10482;21644;27308;27828	10482;21644;27308;27828
Q9H6U8	ALG9	Alpha-1,2-mannosyltransferase ALG9 OS=Homo sapiens GN=ALG9 PE=1 SV=2	Alpha-1,2-mannosyltransferase ALG9	2	2	2	1	2	2	2	0	2	0	2	0	2	4.9	4.9	4.9	69.863	611	611	0.00079618	14.297		By MS/MS	0	4.9	1817200	0	1817200	0	1817200	0	2	2				2447	9486;10898	True;True	10218;11727	25235;29174	25061;29119	25061;29119
Q01433	AMPD2	AMP deaminase 2 OS=Homo sapiens GN=AMPD2 PE=1 SV=2	AMP deaminase 2	3	3	3	1	3	3	3	0	3	0	3	0	3	4.7	4.7	4.7	100.69	879	879	0	30.824		By MS/MS	0	4.7	13625000	0	13625000	0	13625000	0	3	3				1443	9167;15538;16986	True;True;True	9875;16986;18546	24401;24402;42752;46684;46685	24083;24084;43097;46838	24083;43097;46838
Q9UJX3	ANAPC7	Anaphase-promoting complex subunit 7 OS=Homo sapiens GN=ANAPC7 PE=1 SV=4	Anaphase-promoting complex subunit 7	2	2	2	1	2	2	2	0	2	0	2	0	2	4.5	4.5	4.5	66.855	599	599	0.00042194	17.235		By MS/MS	0	4.5	3001800	0	3001800	0	3001800	0	3	3				2675	3844;3966	True;True	4140;4290	10323;10324;10656	10112;10113;10421	10113;10421
Q9UKU9	ANGPTL2	Angiopoietin-related protein 2 OS=Homo sapiens GN=ANGPTL2 PE=2 SV=1	Angiopoietin-related protein 2	5;1	5;1	5;1	2	5	5	5	0	5	0	5	0	5	15.6	15.6	15.6	57.104	493	493;491	0	57.177		By MS/MS	0	15.6	13222000	0	13222000	0	13222000	0	6	6				2684	2949;10063;15892;20391;21677	True;True;True;True;True	3179;10818;17371;22216;23620	8030;26875;43747;56158;59955	7876;7877;26813;44107;56524;60142	7877;26813;44107;56524;60142
Q01484	ANK2	Ankyrin-2 OS=Homo sapiens GN=ANK2 PE=1 SV=4	Ankyrin-2	3	2	2	1	3	2	2	0	3	0	2	0	2	0.8	0.6	0.6	433.71	3957	3957	0.00075873	13.052		By MS/MS	0	0.8	2747700	0	2747700	0	2747700	0	2	2				1445	2116;19216;19993	True;True;False	2288;20948;21785	5769;5770;52856;55002	5687;53151;55386	5687;53151;55386
Q9P2R3	ANKFY1	Rabankyrin-5 OS=Homo sapiens GN=ANKFY1 PE=1 SV=2	Rabankyrin-5	16	16	16	1	16	16	16	0	16	0	16	0	16	22.2	22.2	22.2	128.4	1169	1169	0	153.02		By MS/MS	0	22.2	102310000	0	102310000	0	102310000	0	24	24				2612	1064;1603;5548;7078;7595;8366;8567;9097;9283;11983;12952;15212;15449;17150;19479;20109	True;True;True;True;True;True;True;True;True;True;True;True;True;True;True;True	1158;1748;5985;7636;8191;9017;9236;9799;10000;12881;13927;16623;16890;18724;21237;21912	2939;2940;2941;4441;14744;14745;18772;18773;20189;20190;22288;22289;22290;22814;22815;22816;24262;24710;32177;34957;41696;41697;42525;42526;42527;47149;47150;53656;53657;55363	2905;2906;4295;14477;18430;19852;19853;21911;21912;22401;22402;22403;23922;23923;23924;24472;32171;35019;41874;42880;47340;53973;53974;55796	2905;4295;14477;18430;19852;21912;22401;23923;24472;32171;35019;41874;42880;47340;53974;55796	2236	362
Q8IZ07	ANKRD13A	Ankyrin repeat domain-containing protein 13A OS=Homo sapiens GN=ANKRD13A PE=1 SV=3	Ankyrin repeat domain-containing protein 13A	4	4	4	1	4	4	4	0	4	0	4	0	4	10.7	10.7	10.7	67.618	590	590	0	40.84		By MS/MS	0	10.7	19382000	0	19382000	0	19382000	0	4	4				2011	5721;13648;16201;21968	True;True;True;True	6167;14668;17707;23937	15161;36889;36890;44599;60769	14869;36925;44938;60952	14869;36925;44938;60952
O15084	ANKRD28	Serine/threonine-protein phosphatase 6 regulatory ankyrin repeat subunit A OS=Homo sapiens GN=ANKRD28 PE=1 SV=5	Serine/threonine-protein phosphatase 6 regulatory ankyrin repeat subunit A	4;1	4;1	4;1	2	4	4	4	0	4	0	4	0	4	6.3	6.3	6.3	112.96	1053	1053;993	0	34.468		By MS/MS	0	6.3	7778100	0	7778100	0	7778100	0	4	4				143	2223;7540;18106;22411	True;True;True;True	2403;8133;19761;24404	6052;6053;20063;49632;61868	5930;19742;49771;62004	5930;19742;49771;62004
Q9NW15	ANO10	Anoctamin-10 OS=Homo sapiens GN=ANO10 PE=1 SV=2	Anoctamin-10	7	7	7	1	7	7	7	2	7	2	7	2	7	14.8	14.8	14.8	76.328	660	660	0	106.47	By matching	By MS/MS	2.7	14.8	56791000	59918	56731000	182820	53791000	0	12	12				2551	7787;11853;11883;14412;21650;21651;22329	True;True;True;True;True;True;True	8395;12746;12777;15641;15642;23589;23590;24322	20766;20767;31886;31887;31949;31950;31951;31952;39280;39281;59848;59849;59850;61673;61674	20515;31896;31947;31948;39383;39384;60020;60021;60022;60023;61829;61830	20515;31896;31948;39384;60020;60023;61829	2196	79
Q4KMQ2	ANO6	Anoctamin-6 OS=Homo sapiens GN=ANO6 PE=1 SV=2	Anoctamin-6	11	11	11	1	11	11	11	0	11	0	11	0	11	15.4	15.4	15.4	106.16	910	910	0	109.95		By MS/MS	0	15.4	79126000	0	79126000	0	79126000	0	16	16				1806	2748;2817;6312;14479;15762;15983;18135;19413;19521;21063;22022	True;True;True;True;True;True;True;True;True;True;True	2965;3038;6808;15745;17229;17470;19790;21167;21282;22946;23991	7475;7665;7666;16684;39505;43349;44030;44031;44032;44033;49695;53450;53772;58138;58139;58140;60898	7350;7512;7513;16363;39605;43714;44361;44362;44363;44364;49831;53789;54070;54071;58348;58349;61058	7350;7513;16363;39605;43714;44364;49831;53789;54071;58348;61058	1939;1940	191;552
P15144	ANPEP	Aminopeptidase N OS=Homo sapiens GN=ANPEP PE=1 SV=4	Aminopeptidase N	39	39	39	1	39	39	39	18	39	18	39	18	39	46	46	46	109.54	967	967	0	323.31	By MS/MS	By MS/MS	22	46	9627000000	6324900	9620700000	27702000	8489500000	21	173	194				645	1311;1785;3407;3739;3801;3897;4232;4795;5771;5892;6454;7180;7181;8776;8777;10546;11068;11348;11413;14437;14786;15852;16531;16714;16736;16761;16815;17136;17311;17313;17357;18398;18864;21131;21267;21268;21745;21746;22614	True;True;True;True;True;True;True;True;True;True;True;True;True;True;True;True;True;True;True;True;True;True;True;True;True;True;True;True;True;True;True;True;True;True;True;True;True;True;True	1426;1936;3677;4023;4024;4093;4094;4212;4576;4577;5176;6218;6362;6965;7746;7747;9458;9459;11346;11915;12206;12207;12276;15675;15676;16167;17327;18061;18260;18285;18286;18311;18312;18369;18708;18709;18894;18896;18897;18943;18944;20067;20568;23017;23018;23181;23182;23696;23697;23698;24621	3634;3635;4893;4894;4895;4896;9194;9195;9196;9197;9198;9199;9200;9201;9202;9203;9204;10015;10016;10017;10018;10019;10020;10021;10161;10162;10163;10164;10165;10166;10167;10168;10493;10494;10495;10496;10497;10498;10499;10500;11363;11364;11365;11366;11367;11368;11369;11370;11371;11372;11373;11374;11375;12794;12795;12796;12797;12798;15277;15278;15279;15280;15599;15600;15601;15602;15603;15604;17037;17…	3520;3521;4793;4794;4795;4796;4797;4798;8975;8976;8977;8978;8979;8980;8981;8982;9730;9731;9732;9733;9734;9735;9736;9861;9862;9863;9864;9865;9866;9867;9868;9869;9870;10265;10266;10267;10268;10269;10270;10271;10272;11152;11153;11154;11155;11156;11157;11158;11159;11160;11161;11162;11163;11164;11165;11166;11167;11168;11169;11170;11171;11172;12592;12593;12594;12595;12596;12597;14974;14975;14976;14977;…	3521;4793;8982;9732;9866;10268;11164;12593;14974;15283;16692;18718;18722;22953;22956;28103;29688;30295;30439;39483;40823;43934;45688;46158;46231;46288;46422;47306;47721;47725;47810;50503;52096;58528;58910;58913;60333;60339;62493	618;619;620;621;622;623;624;625;626;627;628	178;199;212;229;249;354;435;444;486;693;780
Q9H6X2	ANTXR1	Anthrax toxin receptor 1 OS=Homo sapiens GN=ANTXR1 PE=1 SV=2	Anthrax toxin receptor 1	2	2	2	1	2	2	2	0	2	0	2	0	2	4.4	4.4	4.4	62.788	564	564	0.00073584	12.266		By MS/MS	0	4.4	6514100	0	6514100	0	6514100	0	2	2				2448	1919;21011	True;True	2079;22891	5270;58004;58005	5197;58225	5197;58225
P58335	ANTXR2	Anthrax toxin receptor 2 OS=Homo sapiens GN=ANTXR2 PE=1 SV=5	Anthrax toxin receptor 2	3	3	3	1	3	3	3	0	3	0	3	0	3	7.4	7.4	7.4	53.666	489	489	0.00043346	18.543		By MS/MS	0	7.4	6172900	0	6172900	0	6172900	0	3	3				1248	4983;11708;21532	True;True;True	5374;12593;23466	13249;31520;59437	13035;31562;59548	13035;31562;59548
P04083	ANXA1	Annexin A1 OS=Homo sapiens GN=ANXA1 PE=1 SV=2	Annexin A1	24	24	24	1	24	24	24	10	24	10	24	10	24	70.8	70.8	70.8	38.714	346	346	0	323.31	By MS/MS	By MS/MS	37.9	70.8	4357000000	10042000	4346900000	20183000	4283100000	22	93	115				430	304;305;1499;1537;1598;2544;3522;7624;7935;8207;8646;8752;8753;10292;11169;14725;14726;14778;15737;15981;17191;17236;19401;20863	True;True;True;True;True;True;True;True;True;True;True;True;True;True;True;True;True;True;True;True;True;True;True;True	330;331;1622;1664;1741;1742;2745;3796;8220;8555;8842;9322;9431;9432;11060;12019;16099;16100;16101;16102;16158;17203;17468;18768;18813;18814;21155;22736	885;886;887;888;889;890;891;892;4132;4133;4134;4135;4276;4277;4425;4426;4427;4428;4429;4430;4431;4432;6935;6936;6937;6938;9492;9493;9494;9495;9496;9497;9498;20329;20330;20331;20332;20333;21120;21121;21122;21123;21124;21125;21126;21127;21128;21882;21883;21884;21885;21886;21887;21888;21889;21890;23029;23030;23031;23032;23033;23034;23305;23306;23307;23308;23309;23310;23311;23312;23313;27490;27491;27…	926;927;928;929;930;931;3988;3989;3990;3991;3992;4143;4144;4282;4283;4284;4285;4286;4287;4288;6789;6790;6791;9270;9271;9272;9273;9274;9275;9276;9277;9278;20085;20086;20087;20088;20089;20821;20822;20823;20824;20825;20826;20827;20828;20829;20830;20831;20832;21559;21560;21561;21562;21563;21564;22603;22604;22605;22606;22607;22608;22856;22857;22858;22859;22860;22861;22862;22863;22864;22865;22866;22867…	926;929;3991;4143;4286;6790;9275;20086;20827;21562;22608;22862;22867;27439;29896;40640;40646;40787;43659;44358;47446;47544;53757;57859	264;265;266	3;308;318
P50995	ANXA11	Annexin A11 OS=Homo sapiens GN=ANXA11 PE=1 SV=1	Annexin A11	14;1	14;1	14;1	2	14	14	14	3	14	3	14	3	14	31.7	31.7	31.7	54.389	505	505;316	0	181.58	By MS/MS	By MS/MS	7.5	31.7	336440000	408370	336030000	447880	329980000	3	32	35				1147	1021;2884;3116;5815;6994;7816;8679;8781;12713;17258;17293;17865;17866;19468	True;True;True;True;True;True;True;True;True;True;True;True;True;True	1108;3108;3361;3362;6275;6276;6277;7546;8426;9355;9463;13661;18838;18875;19496;19497;21226	2815;2816;7852;7853;7854;8426;8427;8428;8429;15414;15415;15416;18553;18554;20833;20834;23118;23119;23120;23413;23414;23415;23416;34229;34230;47427;47428;47506;47507;48973;48974;48975;48976;48977;48978;53628;53629;53630;53631	2782;2783;2784;7691;7692;7693;8286;8287;8288;8289;15109;15110;15111;15112;18215;20572;20573;22690;22691;22692;22975;22976;22977;22978;34294;47606;47683;47684;49118;49119;49120;49121;53954;53955;53956	2783;7693;8288;15112;18215;20572;22691;22978;34294;47606;47683;49118;49121;53955	1341;1342;1343	354;414;422
P07355	ANXA2	Annexin A2 OS=Homo sapiens GN=ANXA2 PE=1 SV=2;Putative annexin A2-like protein OS=Homo sapiens GN=ANXA2P2 PE=5 SV=2	Annexin A2;Putative annexin A2-like protein	30;21	30;21	30;21	2	30	30	30	19	30	19	30	19	30	73.7	73.7	73.7	38.604	339	339;339	0	323.31	By MS/MS	By MS/MS	54.9	73.7	17555000000	41547000	17514000000	50506000	17092000000	62	205	267				485	545;1412;2513;2514;2866;3462;3463;3840;3841;6373;7591;8205;8754;11261;12927;13436;16011;16781;16967;16968;17302;17871;18394;18575;18758;18759;19169;19384;19402;22057	True;True;True;True;True;True;True;True;True;True;True;True;True;True;True;True;True;True;True;True;True;True;True;True;True;True;True;True;True;True	598;1528;2713;2714;3088;3734;3735;4136;4137;6876;8187;8840;9433;12115;13898;13899;14443;17499;18332;18527;18528;18884;18885;19502;20063;20253;20254;20454;20455;20899;21138;21156;24028;24029	1530;1531;1532;1533;1534;1535;1536;1537;1538;1539;1540;1541;1542;1543;1544;1545;1546;1547;1548;1549;1550;1551;1552;3896;3897;3898;3899;3900;3901;6866;6867;6868;6869;6870;6871;6872;6873;6874;6875;7802;7803;7804;7805;7806;7807;7808;9341;9342;9343;9344;9345;9346;9347;9348;9349;10314;10315;10316;10317;10318;10319;16848;20184;20185;21864;21865;21866;21867;21868;21869;21870;21871;21872;21873;21874;2187…	1545;1546;1547;1548;1549;1550;1551;1552;1553;1554;1555;1556;1557;1558;1559;1560;1561;1562;1563;1564;1565;1566;1567;1568;1569;3761;3762;3763;3764;3765;3766;6728;6729;6730;6731;6732;6733;6734;6735;6736;6737;6738;7645;7646;7647;7648;7649;7650;7651;7652;7653;9115;9116;9117;9118;9119;9120;9121;9122;9123;9124;9125;9126;9127;9128;9129;10105;10106;10107;10108;16538;19847;19848;21542;21543;21544;21545;215…	1557;3762;6732;6738;7650;9119;9126;10105;10107;16538;19847;21543;22875;30115;34944;36351;44461;46344;46789;46803;47701;49146;50487;51028;51698;51707;53045;53714;53768;61199	384;385;386;387	171;217;240;300
P12429	ANXA3	Annexin A3 OS=Homo sapiens GN=ANXA3 PE=1 SV=3	Annexin A3	6	6	6	1	6	6	6	3	4	3	4	3	4	23.8	23.8	23.8	36.375	323	323	0	45.853	By MS/MS	By MS/MS	12.4	14.2	7061400	125590	6935800	0	6935800	3	6	9				601	1405;1961;4581;7432;17158;17731	True;True;True;True;True;True	1521;2122;4942;8019;18733;19355	3871;3872;3873;3874;5376;5377;12202;19792;47166;48631	3738;3739;5309;5310;11988;11989;19501;47357;48826	3738;5309;11988;19501;47357;48826
P09525	ANXA4	Annexin A4 OS=Homo sapiens GN=ANXA4 PE=1 SV=4	Annexin A4	14	14	14	1	14	14	14	5	14	5	14	5	14	55.5	55.5	55.5	35.882	319	319	0	201.96	By MS/MS	By MS/MS	19.1	55.5	287800000	208110	287590000	572610	286740000	3	29	32				537	243;3075;7428;8203;8204;10675;15044;15997;17157;17259;17297;20988;21106;21107	True;True;True;True;True;True;True;True;True;True;True;True;True;True	267;3311;8015;8838;8839;11492;16440;17485;18731;18732;18839;18879;22867;22991;22992	701;702;703;704;8312;8313;19780;19781;19782;21856;21857;21858;21859;21860;21861;21862;21863;28575;28576;28577;28578;41259;41260;44068;44069;47162;47163;47164;47165;47429;47430;47512;47513;57941;58249;58250;58251;58252;58253;58254;58255	734;8181;8182;19487;19488;19489;21536;21537;21538;21539;21540;21541;28525;28526;28527;41448;41449;44408;44409;47355;47356;47607;47608;47609;47688;47689;58165;58449;58450;58451;58452;58453;58454;58455	734;8181;19488;21536;21541;28526;41448;44409;47356;47608;47689;58165;58453;58455	477	147
P08758	ANXA5	Annexin A5 OS=Homo sapiens GN=ANXA5 PE=1 SV=2	Annexin A5	21	21	21	1	21	21	21	14	21	14	21	14	21	73.4	73.4	73.4	35.936	320	320	0	323.31	By MS/MS	By MS/MS	56.6	73.4	5378200000	12822000	5365400000	14215000	5307800000	33	102	135				523	364;1394;3708;3981;6259;6853;7426;7636;8208;8724;11028;13930;14453;14454;14955;16727;17233;17594;21071;22045;22654	True;True;True;True;True;True;True;True;True;True;True;True;True;True;True;True;True;True;True;True;True	395;1510;3989;4305;6753;7385;8013;8234;8843;9402;11872;14970;15698;15699;15700;15701;16350;16351;18276;18810;19208;19209;22955;24016;24667;24668	1055;1056;1057;3847;3848;3849;3850;9937;9938;10722;10723;10724;10725;10726;10727;10728;10729;10730;10731;16545;16546;16547;16548;16549;16550;16551;16552;16553;18153;18154;18155;18156;18157;19773;19774;19775;19776;20380;20381;21891;21892;21893;21894;21895;21896;21897;21898;21899;21900;23230;23231;23232;23233;29597;37753;37754;37755;37756;37757;39406;39407;39408;39409;39410;39411;39412;39413;41042;…	1097;3715;3716;3717;3718;3719;9659;9660;10497;10498;10499;10500;10501;10502;10503;10504;10505;10506;10507;10508;16231;16232;16233;16234;16235;16236;16237;17838;17839;17840;17841;17842;17843;17844;19481;19482;19483;19484;20162;20163;21565;21566;21567;21568;21569;21570;21571;21572;21573;21574;21575;21576;22786;22787;22788;22789;22790;22791;22792;29565;37851;37852;37853;37854;37855;37856;37857;37858…	1097;3715;9660;10506;16235;17842;19484;20162;21572;22792;29565;37854;39523;39527;41229;46205;47533;48468;58378;61174;62624	465;466;467;468	152;214;259;299
P08133	ANXA6	Annexin A6 OS=Homo sapiens GN=ANXA6 PE=1 SV=3	Annexin A6	39	39	39	1	39	39	39	21	39	21	39	21	39	67.2	67.2	67.2	75.872	673	673	0	323.31	By MS/MS	By MS/MS	40.3	67.2	3954400000	6782900	3947600000	13151000	3838700000	26	123	149				505	1128;1355;1377;1565;2660;2823;2861;3621;3686;3736;4713;4857;4858;4976;5002;5393;6984;7731;7815;8206;8570;8723;10222;12440;12491;12905;13407;14455;14641;14642;15746;17234;17240;17244;17698;17757;19358;19666;22044	True;True;True;True;True;True;True;True;True;True;True;True;True;True;True;True;True;True;True;True;True;True;True;True;True;True;True;True;True;True;True;True;True;True;True;True;True;True;True	1229;1471;1493;1698;2866;3044;3083;3899;3965;4019;5085;5244;5245;5367;5395;5821;7535;8332;8425;8841;9239;9240;9401;10984;13369;13370;13426;13866;14414;15702;15703;15981;15982;15983;17212;18811;18818;18822;18823;19321;19384;21109;21110;21436;24015	3122;3123;3124;3745;3746;3747;3804;3805;3806;4346;7175;7684;7685;7686;7687;7688;7689;7793;7794;7795;7796;9734;9735;9736;9737;9738;9739;9885;10005;10006;10007;12569;12570;12571;12572;12573;12953;12954;12955;12956;12957;12958;12959;12960;12961;12962;12963;12964;12965;13227;13228;13229;13230;13231;13232;13233;13234;13235;13296;13297;13298;14304;14305;18515;18516;18517;20615;20616;20617;20832;21877;2…	3060;3061;3617;3618;3619;3620;3670;3671;4205;7021;7022;7530;7531;7532;7533;7534;7535;7536;7537;7538;7539;7540;7541;7638;7639;9484;9485;9486;9487;9488;9489;9490;9615;9720;12356;12357;12358;12359;12360;12361;12748;12749;12750;12751;12752;12753;12754;12755;12756;13008;13009;13010;13011;13012;13013;13014;13015;13016;13017;13018;13019;13020;13021;13075;13076;13077;13078;13079;14033;18175;18176;20370;2…	3061;3618;3671;4205;7021;7537;7638;9487;9615;9720;12361;12751;12755;13017;13077;14033;18176;20370;20571;21558;22409;22784;27185;33607;33780;34890;36272;39530;40334;40337;43679;47539;47558;47567;48757;48890;53626;54508;61172	423;424;425;426;427;428;429;430	33;127;157;286;433;434;448;569
P20073	ANXA7	Annexin A7 OS=Homo sapiens GN=ANXA7 PE=1 SV=3	Annexin A7	13	13	13	1	13	13	13	4	13	4	13	4	13	29.7	29.7	29.7	52.739	488	488	0	176.03	By MS/MS	By MS/MS	8.8	29.7	117400000	312450	117090000	1159300	115380000	2	21	23				760	2153;3099;3731;5149;7427;7817;12279;13978;15727;16433;17235;19239;20953	True;True;True;True;True;True;True;True;True;True;True;True;True	2325;3341;3342;4013;5555;8014;8427;13198;15018;17193;17951;18812;20972;22831	5852;8377;8378;8379;8380;8381;9986;9987;9988;13659;19777;19778;19779;20835;20836;20837;33082;33083;37879;37880;43253;43254;43255;45233;45234;45235;47356;47357;47358;47359;52909;52910;52911;52912;57846;57847	5757;8238;8239;8240;8241;9703;9704;13440;19485;19486;20574;33254;37983;37984;43634;45483;45484;47540;47541;47542;47543;53198;53199;58077	5757;8239;9703;13440;19486;20574;33254;37984;43634;45483;47542;53198;58077	870	341
Q10567	AP1B1	AP-1 complex subunit beta-1 OS=Homo sapiens GN=AP1B1 PE=1 SV=2	AP-1 complex subunit beta-1	21	9	9	1	21	9	9	6	21	0	9	0	9	28.7	16.1	16.1	104.64	949	949	0	71.037	By matching	By MS/MS	7.2	28.7	95113000	0	95113000	0	95113000	0	15	15				1519	195;628;1682;2661;2932;2958;4481;4482;6478;9612;10731;10732;11310;11554;11579;14221;15106;15614;18096;20357;22660	False;True;True;False;False;True;True;True;False;True;False;False;True;True;False;False;False;False;True;False;False	214;215;686;1829;2867;3161;3188;4837;4838;6991;10350;11549;11550;12165;12424;12449;15367;15368;16507;17069;19751;22180;24674	555;556;557;1772;4609;7176;7177;8002;8003;8004;8045;8046;11964;11965;17092;17093;17094;17095;25570;25571;28727;28728;28729;28730;30318;30319;30959;30960;31023;31024;31025;31026;31027;38703;38704;41427;41428;42953;42954;42955;49618;49619;56068;62519;62520;62521	581;582;1774;4456;7023;7845;7846;7847;7891;7892;11738;11739;11740;16730;16731;16732;16733;16734;25391;25392;28670;28671;28672;30208;30209;30210;30850;30905;30906;30907;30908;30909;30910;38813;38814;41613;41614;43336;43337;49758;49759;56430;62639;62640;62641;62642	581;1774;4456;7023;7846;7891;11739;11740;16734;25392;28670;28671;30209;30850;30908;38813;41614;43337;49759;56430;62642	1563;1566	448;806
O43747	AP1G1	AP-1 complex subunit gamma-1 OS=Homo sapiens GN=AP1G1 PE=1 SV=5	AP-1 complex subunit gamma-1	11	11	11	1	11	11	11	2	11	2	11	2	11	19.1	19.1	19.1	91.35	822	822	0	110.29	By matching	By MS/MS	2.4	19.1	39102000	58396	39043000	70065	39032000	0	15	15				212	371;5681;9695;14838;15622;16042;18335;18944;20829;21858;22881	True;True;True;True;True;True;True;True;True;True;True	405;6125;10434;16227;17077;17537;20000;20657;22698;23821;24909	1084;1085;1086;15067;25768;25769;25770;40783;40784;40785;42977;44200;50200;50201;52050;52051;57466;57467;60461;60462;63239;63240	1125;1126;14782;25616;25617;40978;40979;43361;44545;50323;52317;57754;57755;60626;63501;63502	1125;14782;25616;40979;43361;44545;50323;52317;57754;60626;63502
Q9BXS5	AP1M1	AP-1 complex subunit mu-1 OS=Homo sapiens GN=AP1M1 PE=1 SV=3	AP-1 complex subunit mu-1	11;2	11;2	11;2	2	11	11	11	1	11	1	11	1	11	34	34	34	48.586	423	423;423	0	78.846	By matching	By MS/MS	4.7	34	90692000	55063	90637000	0	90637000	0	16	16				2371	4987;6678;7638;9232;10267;16990;18296;18424;20439;22160;22506	True;True;True;True;True;True;True;True;True;True;True	5378;7201;8236;9945;11034;18550;19961;20094;22270;24140;24505	13255;13256;17666;20383;20384;24581;27427;27428;46690;46691;46692;50092;50093;50094;50095;50096;50472;56301;56302;61229;61230;62096;62097	13040;17323;20165;24346;27376;27377;27378;46843;46844;50212;50213;50214;50215;50588;56659;61400;62232	13040;17323;20165;24346;27376;46844;50215;50588;56659;61400;62232
P61966	AP1S1	AP-1 complex subunit sigma-1A OS=Homo sapiens GN=AP1S1 PE=1 SV=1	AP-1 complex subunit sigma-1A	3	3	2	1	3	3	2	0	3	0	3	0	2	20.9	20.9	15.8	18.733	158	158	0	27.913		By MS/MS	0	20.9	16909000	0	16909000	0	16909000	0	3	3				1305	1083;5684;14054	True;True;True	1179;6128;15115	2992;2993;2994;2995;15071;38111	2952;2953;14785;38206	2952;14785;38206
O95782	AP2A1	AP-2 complex subunit alpha-1 OS=Homo sapiens GN=AP2A1 PE=1 SV=3	AP-2 complex subunit alpha-1	27	27	20	1	27	27	20	6	27	6	27	5	20	38.9	38.9	29.9	107.54	977	977	0	234.61	By MS/MS	By MS/MS	6.6	38.9	877630000	543930	877090000	549130	861360000	3	62	65				373	85;348;1397;1623;1997;2136;2274;3170;5790;6841;8154;10291;10913;12672;12804;13726;14750;16284;16404;16557;18237;19048;19635;19776;20535;22538;22562	True;True;True;True;True;True;True;True;True;True;True;True;True;True;True;True;True;True;True;True;True;True;True;True;True;True;True	94;377;1513;1768;2160;2308;2461;3418;6242;6243;7373;8787;11059;11744;13617;13758;14750;16129;17793;17919;18089;19901;20767;21401;21549;21550;22372;24539;24540;24567	238;239;240;241;1009;3857;3858;3859;4477;5445;5446;5447;5806;5807;5808;6208;8548;8549;8550;15349;15350;15351;15352;15353;15354;15355;15356;18126;18127;18128;21724;21725;27486;27487;27488;27489;29220;29221;29222;29223;29224;34132;34133;34134;34468;34469;37153;37154;40519;40520;44804;44805;44806;45146;45147;45538;45539;45540;49944;49945;52361;52362;54055;54056;54057;54437;54438;54439;56581;56582;56…	282;1046;3725;3726;4326;5371;5719;5720;6098;8385;8386;8387;15063;15064;15065;15066;15067;17807;17808;17809;17810;21416;21417;21418;27433;27434;27435;27436;29162;29163;29164;29165;29166;34212;34213;34214;34215;34526;37250;37251;37252;40726;45109;45415;45752;50072;52643;52644;54388;54389;54390;54792;54793;54794;54795;56915;56916;56917;62319;62320;62321;62322;62323;62374;62375;62376	282;1046;3725;4326;5371;5720;6098;8385;15065;17810;21416;27435;29162;34214;34526;37250;40726;45109;45415;45752;50072;52643;54390;54794;56916;62321;62374	200;210;211	143;353;496
O94973	AP2A2	AP-2 complex subunit alpha-2 OS=Homo sapiens GN=AP2A2 PE=1 SV=2	AP-2 complex subunit alpha-2	23	16	16	1	23	16	16	1	23	0	16	0	16	35	25.7	25.7	103.96	939	939	0	181.06	By matching	By MS/MS	1	35	209090000	0	209090000	0	207140000	0	28	28				336	348;1397;2244;5780;8154;10028;11163;12803;13499;13544;14750;14803;15330;16405;16557;18236;19638;19775;20535;20756;21088;22410;22538	False;False;True;True;False;True;True;True;True;True;False;True;True;True;False;True;True;True;False;True;True;True;False	377;1513;2426;6228;8787;10782;12013;13757;14510;14557;16129;16190;16765;17920;18089;19900;21404;21548;22372;22619;22972;22973;24403;24539;24540	1009;3857;3858;3859;6115;6116;15299;15300;21724;21725;26750;26751;29956;34467;36453;36454;36553;36554;40519;40520;40705;42234;42235;45148;45538;45539;45540;49943;54062;54063;54435;54436;56581;56582;56583;57253;58211;58212;58213;61865;61866;61867;62190;62191;62192;62193;62194;62195	1046;3725;3726;6008;14995;14996;21416;21417;21418;26696;26697;29885;34525;36493;36494;36573;36574;36575;36576;40726;40905;42607;45416;45752;50071;54394;54790;54791;56915;56916;56917;57560;58416;58417;58418;58419;62001;62002;62003;62319;62320;62321;62322;62323	1046;3725;6008;14996;21416;26696;29885;34525;36493;36575;40726;40905;42607;45416;45752;50071;54394;54790;56916;57560;58417;62002;62321	198;199;200	161;352;601
P63010	AP2B1	AP-2 complex subunit beta OS=Homo sapiens GN=AP2B1 PE=1 SV=1	AP-2 complex subunit beta	28	28	16	1	28	28	16	9	28	9	28	3	16	42.9	42.9	30.2	104.55	937	937	0	264.92	By MS/MS	By MS/MS	10.8	42.9	800430000	1124200	799300000	3147000	767460000	5	65	70				1364	195;1683;2434;2661;2932;3494;3687;4838;6478;9613;10731;10732;11308;11555;11579;12323;12840;13256;13615;14221;15106;15614;16164;16672;18095;20357;22660;22705	True;True;True;True;True;True;True;True;True;True;True;True;True;True;True;True;True;True;True;True;True;True;True;True;True;True;True;True	214;215;1830;2630;2867;3161;3766;3966;3967;5221;6991;10351;11549;11550;12163;12425;12449;13243;13244;13795;14255;14632;15367;15368;16507;17069;17667;18215;19749;19750;22180;24674;24726	555;556;557;4610;4611;6629;6630;6631;7176;7177;8002;8003;8004;9417;9886;9887;9888;12905;12906;12907;17092;17093;17094;17095;25572;25573;28727;28728;28729;28730;30311;30312;30313;30314;30315;30961;30962;30963;30964;30965;31023;31024;31025;31026;31027;33197;33198;33199;33200;33201;34584;34585;34586;34587;35769;35770;35771;36749;36750;38703;38704;41427;41428;42953;42954;42955;44521;45866;49605;49606…	581;582;4457;4458;6489;7023;7845;7846;7847;9196;9616;9617;9618;9619;12706;12707;16730;16731;16732;16733;16734;25393;25394;28670;28671;28672;30202;30203;30204;30205;30851;30852;30853;30854;30905;30906;30907;30908;30909;30910;33365;33366;33367;34647;35817;35818;36751;38813;38814;41613;41614;43336;43337;44862;46045;49745;49746;49747;49748;49749;49750;49751;49752;49753;49754;49755;49756;49757;56430;6…	581;4457;6489;7023;7846;9196;9619;12707;16734;25394;28670;28671;30203;30854;30908;33366;34647;35818;36751;38813;41614;43337;44862;46045;49755;56430;62642;62838	1563;1564;1565;1566;1567;1568	83;86;155;175;448;797
Q96CW1	AP2M1	AP-2 complex subunit mu OS=Homo sapiens GN=AP2M1 PE=1 SV=2	AP-2 complex subunit mu	14	14	14	1	14	14	14	6	13	6	13	6	13	39.8	39.8	39.8	49.654	435	435	0	138.87	By MS/MS	By MS/MS	14.3	39.8	164480000	1064500	163410000	1541200	160490000	4	26	30				2193	1916;3458;5068;6138;6139;10451;13047;14341;14930;16572;17605;18027;18564;18937	True;True;True;True;True;True;True;True;True;True;True;True;True;True	2076;3730;5472;6624;6625;11248;14028;15537;16325;18106;19221;19676;20242;20649	5263;5264;5265;5266;9333;13464;13465;13466;13467;13468;16212;16213;27954;27955;35224;35225;35226;35227;39011;40999;45577;45578;48335;48336;49424;49425;49426;50880;50881;50882;52029;52030;52031;52032;52033;52034;52035;52036;52037	5190;5191;5192;5193;9106;13246;13247;13248;13249;13250;13251;13252;13253;13254;15882;15883;27882;27883;35289;35290;39111;41185;41186;45788;45789;48564;48565;49576;51007;51008;52300;52301;52302	5193;9106;13246;15882;15883;27883;35290;39111;41186;45789;48564;49576;51007;52302	2054	338
P53680	AP2S1	AP-2 complex subunit sigma OS=Homo sapiens GN=AP2S1 PE=1 SV=2	AP-2 complex subunit sigma	6	6	6	1	6	6	6	2	5	2	5	2	5	44.4	44.4	44.4	17.018	142	142	0	47.224	By MS/MS	By MS/MS	15.5	33.8	87988000	234830	87753000	0	84782000	2	10	12				1201	6837;9334;12405;16373;21969;22167	True;True;True;True;True;True	7369;10055;13332;17885;17886;23938;24147	18115;18116;18117;18118;24823;33383;45065;45066;45067;45068;60770;61242;61243	17791;17792;24580;33531;33532;45345;45346;45347;45348;60953;61411;61412	17791;24580;33532;45346;60953;61411	1386;1387	117;137
O00203	AP3B1	AP-3 complex subunit beta-1 OS=Homo sapiens GN=AP3B1 PE=1 SV=3	AP-3 complex subunit beta-1	18;4	18;4	18;4	2	18	18	18	0	18	0	18	0	18	21.9	21.9	21.9	121.32	1094	1094;1082	0	124.91		By MS/MS	0	21.9	600800000	0	600800000	0	600800000	0	25	25				71	1368;2126;2972;4784;5647;6427;9812;12604;12814;13224;14796;16115;17373;19491;21297;21838;22183;22276	True;True;True;True;True;True;True;True;True;True;True;True;True;True;True;True;True;True	1484;2298;3203;5164;6087;6935;10554;13543;13768;14219;16180;17613;18960;21250;23215;23799;24163;24267	3778;5788;8067;12764;14996;14997;16968;26162;33931;33932;33933;34507;34508;35672;35673;35674;40665;40666;40667;40668;44363;44364;47676;47677;53685;53686;53687;58841;58842;60415;61282;61283;61284;61538;61539	3647;5705;7912;12553;14715;16633;16634;26148;34038;34039;34560;35728;35729;40868;40869;40870;44707;47833;47834;53997;58981;60586;61445;61446;61447;61694;61695	3647;5705;7912;12553;14715;16634;26148;34038;34560;35728;40869;44707;47833;53997;58981;60586;61445;61694
O14617	AP3D1	AP-3 complex subunit delta-1 OS=Homo sapiens GN=AP3D1 PE=1 SV=1	AP-3 complex subunit delta-1	15	15	15	1	15	15	15	0	15	0	15	0	15	18.7	18.7	18.7	130.16	1153	1153	0	173.58		By MS/MS	0	18.7	109190000	0	109190000	0	108370000	0	22	22				106	1902;4466;5491;5965;6565;9952;10214;11847;12647;13110;14581;15238;21693;22504;22567	True;True;True;True;True;True;True;True;True;True;True;True;True;True;True	2061;4822;5924;6437;6438;7080;10702;10976;12740;13592;14095;15899;16651;23637;24503;24572	5209;5210;11930;11931;11932;11933;14613;14614;15791;15792;15793;15794;15795;17324;26543;27266;27267;31869;34067;35391;35392;35393;35394;39921;41760;59989;62091;62260;62261	5109;11703;11704;11705;14369;15484;15485;15486;16951;26497;27173;31885;34158;34159;35460;35461;35462;40142;41935;60180;62228;62384	5109;11705;14369;15485;16951;26497;27173;31885;34159;35462;40142;41935;60180;62228;62384	72	553
Q9Y2T2	AP3M1	AP-3 complex subunit mu-1 OS=Homo sapiens GN=AP3M1 PE=1 SV=1	AP-3 complex subunit mu-1	9;1	9;1	9;1	2	9	9	9	1	9	1	9	1	9	30.6	30.6	30.6	46.939	418	418;418	0	64.235	By matching	By MS/MS	1.9	30.6	31228000	12334	31216000	0	31216000	0	14	14				2752	6613;8291;10530;12581;21053;21087;21552;21820;22864	True;True;True;True;True;True;True;True;True	7130;8930;11330;13518;22936;22971;23488;23781;24891	17448;17449;22091;22092;28158;28159;33854;58118;58208;58209;58210;59519;60371;63185	17080;17081;17082;21732;21733;28071;28072;33971;58330;58415;59654;60554;60555;63443	17082;21733;28071;33971;58330;58415;59654;60555;63443
Q92572	AP3S1	AP-3 complex subunit sigma-1 OS=Homo sapiens GN=AP3S1 PE=1 SV=1	AP-3 complex subunit sigma-1	2	2	2	1	2	2	2	0	2	0	2	0	2	15	15	15	21.732	193	193	0.0014291	11.267		By MS/MS	0	15	16359000	0	16359000	0	16359000	0	2	2				2115	6210;16787	True;True	6702;18338	16424;46179	16110;46353	16110;46353
P13798	APEH	Acylamino-acid-releasing enzyme OS=Homo sapiens GN=APEH PE=1 SV=4	Acylamino-acid-releasing enzyme	9	9	9	1	9	9	9	2	9	2	9	2	9	21.7	21.7	21.7	81.224	732	732	0	87.637	By matching	By MS/MS	3.7	21.7	76800000	64013	76736000	87192	74796000	0	21	21				623	1276;8617;16483;16689;16759;19440;21039;21688;21772	True;True;True;True;True;True;True;True;True	1388;9291;18010;18233;18309;21194;21195;22921;23632;23731	3537;3538;22960;22961;22962;22963;45361;45362;45363;45364;45907;45908;45909;46103;53530;53531;53532;53533;53534;58086;59981;59982;60244	3430;3431;22539;22540;22541;22542;22543;45593;45594;45595;45596;45597;45598;46076;46077;46285;53861;53862;58304;60174;60438	3430;22542;45594;46076;46285;53862;58304;60174;60438	590	670
P27695	APEX1	DNA-(apurinic or apyrimidinic site) lyase OS=Homo sapiens GN=APEX1 PE=1 SV=2	DNA-(apurinic or apyrimidinic site) lyase;DNA-(apurinic or apyrimidinic site) lyase, mitochondrial	4	4	4	1	4	4	4	0	4	0	4	0	4	17.6	17.6	17.6	35.554	318	318	0	26.18		By MS/MS	0	17.6	29964000	0	29964000	0	29964000	0	6	6				856	4617;5305;9541;11798	True;True;True;True	4982;5727;10274;12690	12293;12294;14079;25376;31752	12074;12075;12076;13817;25219;31780	12075;13817;25219;31780
Q96BI3	APH1A	Gamma-secretase subunit APH-1A OS=Homo sapiens GN=APH1A PE=1 SV=1	Gamma-secretase subunit APH-1A	2	2	2	1	2	2	2	0	2	0	2	0	2	5.3	5.3	5.3	28.996	265	265	0.00076717	13.334		By MS/MS	0	5.3	6447600	0	6447600	0	6447600	0	2	2				2181	392;11008	True;True	430;11847	1141;29546;29547;29548	1182;29514	1182;29514
Q9HDC9	APMAP	Adipocyte plasma membrane-associated protein OS=Homo sapiens GN=APMAP PE=1 SV=2	Adipocyte plasma membrane-associated protein	10	10	10	1	10	10	10	3	10	3	10	3	10	33.4	33.4	33.4	46.48	416	416	0	90.266	By MS/MS	By MS/MS	6.7	33.4	357160000	461910	356700000	2112000	348340000	1	19	20				2490	5943;7041;8185;10962;11948;12040;12084;12770;15815;20970	True;True;True;True;True;True;True;True;True;True	6415;7594;7595;8820;11796;12844;12940;12991;13721;17284;22848	15741;15742;18678;18679;18680;18681;18682;21809;21810;29401;29402;29403;32099;32100;32314;32315;32316;32545;34393;34394;34395;34396;34397;43481;57898;57899;57900;57901	15439;18332;18333;18334;18335;21499;21500;29369;32103;32104;32299;32300;32301;32302;32711;34463;34464;34465;43828;58128	15439;18333;21499;29369;32103;32300;32711;34465;43828;58128	2175	278
P05090	APOD	Apolipoprotein D OS=Homo sapiens GN=APOD PE=1 SV=1	Apolipoprotein D	3	3	3	1	3	3	3	2	3	2	3	2	3	16.9	16.9	16.9	21.275	189	189	0.00042159	17.149	By MS/MS	By MS/MS	9.5	16.9	2733300	80339	2653000	103700	2629600	1	2	3				446	2699;15100;21001	True;True;True	2912;16501;22881	7367;41414;41415;41416;57977;57978	7253;41604;58200	7253;41604;58200
P02649	APOE	Apolipoprotein E OS=Homo sapiens GN=APOE PE=1 SV=1	Apolipoprotein E	11	11	9	1	11	11	9	0	11	0	11	0	9	38.8	38.8	32.5	36.154	317	317	0	185.03		By MS/MS	0	38.8	94582000	0	94582000	0	85241000	0	19	19				422	273;1197;7769;11607;11692;11873;12254;16730;17249;18518;21342	True;True;True;True;True;True;True;True;True;True;True	298;1302;8376;12483;12576;12767;13171;18279;18828;20192;23263	789;790;3279;3280;3281;3282;3283;20725;20726;20727;31147;31148;31480;31926;33015;33016;46027;46028;47397;47398;47399;50715;58976;58977	814;815;3202;3203;3204;20476;20477;31011;31528;31933;33201;46211;47579;47580;47581;47582;50838;59110;59111	814;3203;20477;31011;31528;31933;33201;46211;47579;50838;59111
Q9BQE5	APOL2	Apolipoprotein L2 OS=Homo sapiens GN=APOL2 PE=1 SV=1	Apolipoprotein L2	6	6	6	1	6	6	6	1	6	1	6	1	6	27.9	27.9	27.9	37.092	337	337	0	51.333	By matching	By MS/MS	3.3	27.9	41656000	16532	41639000	0	41639000	0	9	9				2321	1215;5162;5870;5871;10573;14504	True;True;True;True;True;True	1320;5568;6339;6340;11375;15779	3327;3328;3329;13683;13684;15558;15559;15560;28271;39575	3234;3235;3236;13464;13465;13466;15243;15244;28180;39682	3234;13464;15243;15244;28180;39682
Q9BUR5	APOO	Apolipoprotein O OS=Homo sapiens GN=APOO PE=1 SV=1	Apolipoprotein O	2	2	2	1	2	2	2	0	2	0	2	0	2	17.7	17.7	17.7	22.284	198	198	0.00041701	16.633		By MS/MS	0	17.7	2736800	0	2736800	0	2736800	0	2	2				2349	9389;20150	True;True	10115;21956	24986;55490	24825;55919	24825;55919
Q6UXV4	APOOL	MICOS complex subunit MIC27 OS=Homo sapiens GN=APOOL PE=1 SV=1	MICOS complex subunit MIC27	4	4	4	1	4	4	4	0	4	0	4	0	4	27.2	27.2	27.2	29.159	268	268	0	23.543		By MS/MS	0	27.2	16051000	0	16051000	0	16051000	0	4	4				1914	10804;12275;16421;22892	True;True;True;True	11626;13194;17936;24921	28922;33072;45192;63274	28853;33249;45454;63541	28853;33249;45454;63541
Q9UKG1	APPL1	DCC-interacting protein 13-alpha OS=Homo sapiens GN=APPL1 PE=1 SV=1	DCC-interacting protein 13-alpha	4	4	4	1	4	4	4	0	4	0	4	0	4	7.6	7.6	7.6	79.663	709	709	0	26.469		By MS/MS	0	7.6	3825000	0	3825000	0	3825000	0	4	4				2679	10950;12399;16289;17072	True;True;True;True	11783;13326;17798;18638	29363;33368;44831;46953	29328;33520;45134;47168	29328;33520;45134;47168
Q8NEU8	APPL2	DCC-interacting protein 13-beta OS=Homo sapiens GN=APPL2 PE=1 SV=3	DCC-interacting protein 13-beta	16	16	16	1	16	16	16	0	16	0	16	0	16	42	42	42	74.493	664	664	0	127.53		By MS/MS	0	42	37739000	0	37739000	0	37301000	0	19	19				2059	1618;2075;3804;5468;9544;14112;16290;16302;17438;17788;18785;19382;21290;21544;21939;22222	True;True;True;True;True;True;True;True;True;True;True;True;True;True;True;True	1763;2241;4098;5900;10277;15202;15203;17799;17811;19033;19415;20485;21136;23204;23480;23908;24206	4472;5635;10198;14559;14560;25380;25381;38296;38297;44832;44870;47868;47869;48778;51636;53364;58817;59496;60673;61397	4321;5555;9939;14321;25224;25225;25226;38385;38386;45135;45177;48040;48946;51847;53693;58951;58952;59611;60821;61548	4321;5555;9939;14321;25224;38385;45135;45177;48040;48946;51847;53693;58951;59611;60821;61548	2000	232
P07741	APRT	Adenine phosphoribosyltransferase OS=Homo sapiens GN=APRT PE=1 SV=2	Adenine phosphoribosyltransferase	9	9	9	1	9	9	9	2	9	2	9	2	9	68.3	68.3	68.3	19.608	180	180	0	90.268	By MS/MS	By MS/MS	9.4	68.3	148570000	230000	148340000	308840	147970000	1	17	18				492	147;490;615;7828;8129;9642;11556;17358;21888	True;True;True;True;True;True;True;True;True	158;543;673;8439;8762;10381;12426;18945;23854	401;402;1410;1411;1412;1746;1747;20864;20865;21674;25657;25658;25659;25660;25661;30966;30967;30968;47650;47651;60561;60562	436;1429;1430;1431;1751;20596;20597;21371;25488;25489;25490;25491;25492;30855;30856;30857;47813;60726	436;1430;1751;20597;21371;25489;30856;47813;60726
P10398	ARAF	Serine/threonine-protein kinase A-Raf OS=Homo sapiens GN=ARAF PE=1 SV=2;RAF proto-oncogene serine/threonine-protein kinase OS=Homo sapiens GN=RAF1 PE=1 SV=1	Serine/threonine-protein kinase A-Raf;RAF proto-oncogene serine/threonine-protein kinase	3;2;1	3;2;1	3;2;1	3	3	3	3	1	3	1	3	1	3	5.9	5.9	5.9	67.585	606	606;648;766	0.00043309	18.443	By matching	By MS/MS	1.7	5.9	4396000	10986	4385000	0	4385000	0	3	3				561	9867;17927;21543	True;True;True	10613;19570;23479	26321;26322;26323;49160;59495	26313;49316;59610	26313;49316;59610
Q96P48	ARAP1	Arf-GAP with Rho-GAP domain, ANK repeat and PH domain-containing protein 1 OS=Homo sapiens GN=ARAP1 PE=1 SV=3	Arf-GAP with Rho-GAP domain, ANK repeat and PH domain-containing protein 1	5	5	5	1	5	5	5	0	5	0	5	0	5	5.9	5.9	5.9	162.19	1450	1450	0	32.005		By MS/MS	0	5.9	30546000	0	30546000	0	30546000	0	4	4				2252	58;525;799;13966;21999	True;True;True;True;True	65;578;865;15006;23968	161;1478;2204;2205;37852;60843	174;1493;2201;37958;61019	174;1493;2201;37958;61019
P48444	ARCN1	Coatomer subunit delta OS=Homo sapiens GN=ARCN1 PE=1 SV=1	Coatomer subunit delta	13	13	13	1	13	13	13	3	13	3	13	3	13	28.8	28.8	28.8	57.21	511	511	0	114.47	By MS/MS	By MS/MS	6.1	28.8	86325000	91226	86233000	67899	86257000	1	16	17				1082	5903;8834;8835;9703;12086;13968;14317;15516;15570;15699;17362;17476;20966	True;True;True;True;True;True;True;True;True;True;True;True;True	6373;9521;9522;10443;12993;15008;15504;16962;17022;17162;18949;19075;22844	15627;15628;15629;23574;23575;23576;25790;25791;25792;32549;32550;37855;38950;42688;42846;43196;47656;47657;47949;47950;57886;57887	15302;15303;23163;23164;23165;25637;25638;32714;37961;39039;43037;43209;43582;47819;48116;48117;48118;48119;58116	15302;23164;23165;25638;32714;37961;39039;43037;43209;43582;47819;48117;58116
P84077	ARF1	ADP-ribosylation factor 1 OS=Homo sapiens GN=ARF1 PE=1 SV=2	ADP-ribosylation factor 1	10	10	1	1	10	10	1	7	10	7	10	0	1	72.4	72.4	14.9	20.697	181	181	0	157.72	By MS/MS	By MS/MS	53.6	72.4	2803600000	26089000	2777500000	20988000	2605000000	30	76	106				1414	2910;9395;10248;12149;12227;14379;14380;15117;15694;16025	True;True;True;True;True;True;True;True;True;True	3139;10121;11013;11014;13061;13144;15589;15590;15591;15592;16518;17157;17515;17516	7957;7958;7959;7960;7961;7962;24995;24996;24997;24998;27372;27373;27374;27375;27376;27377;27378;27379;27380;27381;27382;27383;27384;27385;27386;27387;27388;27389;27390;32762;32763;32764;32765;32766;32767;32768;32769;32770;32771;32772;32773;32961;39118;39119;39120;39121;39122;39123;39124;39125;39126;39127;39128;39129;39130;39131;39132;39133;41447;41448;41449;41450;41451;41452;41453;41454;43187;431…	7802;7803;7804;7805;7806;7807;7808;7809;7810;7811;7812;7813;7814;24832;24833;24834;24835;24836;24837;24838;24839;24840;24841;24842;24843;27320;27321;27322;27323;27324;27325;27326;27327;27328;27329;27330;27331;27332;27333;27334;27335;27336;27337;27338;27339;27340;27341;27342;27343;27344;27345;32972;32973;32974;32975;32976;32977;32978;32979;32980;32981;32982;32983;32984;32985;32986;33160;39204;3920…	7811;24837;27332;32977;33160;39208;39217;41629;43569;44505	833;1632;1633	22;110;134
P18085	ARF4	ADP-ribosylation factor 4 OS=Homo sapiens GN=ARF4 PE=1 SV=3	ADP-ribosylation factor 4	10	7	7	1	10	7	7	6	10	3	7	3	7	71.1	43.3	43.3	20.511	180	180	0	63.091	By MS/MS	By MS/MS	43.3	71.1	401970000	900290	401070000	921000	371400000	4	23	27				740	2909;9395;10248;10489;12149;12234;14415;14416;16024;19866	True;False;False;True;False;True;True;True;True;True	3138;10121;11013;11014;11287;13061;13151;15645;15646;15647;17513;17514;21649	7952;7953;7954;7955;7956;24995;24996;24997;24998;27372;27373;27374;27375;27376;27377;27378;27379;27380;27381;27382;27383;27384;27385;27386;27387;27388;27389;27390;28058;28059;28060;28061;28062;28063;28064;32762;32763;32764;32765;32766;32767;32768;32769;32770;32771;32772;32773;32969;32970;39284;39285;39286;39287;39288;39289;39290;44140;44141;44142;44143;44144;44145;44146;44147;44148;54702	7796;7797;7798;7799;7800;7801;24832;24833;24834;24835;24836;24837;24838;24839;24840;24841;24842;24843;27320;27321;27322;27323;27324;27325;27326;27327;27328;27329;27330;27331;27332;27333;27334;27335;27336;27337;27338;27339;27340;27341;27342;27343;27344;27345;27980;27981;27982;27983;27984;27985;32972;32973;32974;32975;32976;32977;32978;32979;32980;32981;32982;32983;32984;32985;32986;33169;33170;393…	7799;24837;27332;27983;32977;33169;39389;39390;44497;55111	833;834;835;836	22;110;134;139
P84085	ARF5	ADP-ribosylation factor 5 OS=Homo sapiens GN=ARF5 PE=1 SV=2	ADP-ribosylation factor 5	9	5	5	1	9	5	5	5	9	1	5	1	5	74.4	41.1	41.1	20.529	180	180	0	34.886	By MS/MS	By MS/MS	38.9	74.4	42070000	431030	41639000	0	39681000	1	6	7				1415	2910;9395;10248;12149;12233;15058;16032;19865;21366	False;False;False;False;True;True;True;True;True	3139;10121;11013;11014;13061;13150;16457;17524;17525;17526;21648;23288	7957;7958;7959;7960;7961;7962;24995;24996;24997;24998;27372;27373;27374;27375;27376;27377;27378;27379;27380;27381;27382;27383;27384;27385;27386;27387;27388;27389;27390;32762;32763;32764;32765;32766;32767;32768;32769;32770;32771;32772;32773;32968;41284;41285;44171;44172;44173;54701;59040;59041	7802;7803;7804;7805;7806;7807;7808;7809;7810;7811;7812;7813;7814;24832;24833;24834;24835;24836;24837;24838;24839;24840;24841;24842;24843;27320;27321;27322;27323;27324;27325;27326;27327;27328;27329;27330;27331;27332;27333;27334;27335;27336;27337;27338;27339;27340;27341;27342;27343;27344;27345;32972;32973;32974;32975;32976;32977;32978;32979;32980;32981;32982;32983;32984;32985;32986;33168;41484;4451…	7811;24837;27332;32977;33168;41484;44520;55110;59175	833;1634;1635	22;130;134
P62330	ARF6	ADP-ribosylation factor 6 OS=Homo sapiens GN=ARF6 PE=1 SV=2	ADP-ribosylation factor 6	6	6	6	1	6	6	6	3	6	3	6	3	6	58.9	58.9	58.9	20.082	175	175	0	58.748	By MS/MS	By MS/MS	24.6	58.9	431790000	762980	431030000	1929800	415760000	4	26	30				1330	7029;9408;10247;12263;15695;16023	True;True;True;True;True;True	7582;10134;11011;11012;13182;17158;17512	18647;18648;18649;18650;25024;25025;25026;25027;27366;27367;27368;27369;27370;27371;33044;33045;33046;33047;33048;33049;33050;33051;33052;43189;43190;43191;43192;44138;44139	18299;18300;18301;18302;18303;24874;24875;27311;27312;27313;27314;27315;27316;27317;27318;27319;33226;33227;33228;33229;33230;33231;33232;43572;43573;43574;43575;43576;44488;44489	18300;24875;27317;33228;43576;44489	1527	18
Q8N6T3	ARFGAP1	ADP-ribosylation factor GTPase-activating protein 1 OS=Homo sapiens GN=ARFGAP1 PE=1 SV=2	ADP-ribosylation factor GTPase-activating protein 1	3	3	3	1	3	3	3	0	3	0	3	0	3	8.9	8.9	8.9	44.667	406	406	0.0004279	17.794		By MS/MS	0	8.9	1820300	0	1820300	0	1820300	0	3	3				2035	3569;21484;22899	True;True;True	3844;23413;24928	9610;59330;63297	9376;59457;63567	9376;59457;63567
Q9Y6D5	ARFGEF2	Brefeldin A-inhibited guanine nucleotide-exchange protein 2 OS=Homo sapiens GN=ARFGEF2 PE=1 SV=3	Brefeldin A-inhibited guanine nucleotide-exchange protein 2	2	2	1	1	2	2	1	0	2	0	2	0	1	1.5	1.5	1	202.04	1785	1785	0.00074794	12.726		By MS/MS	0	1.5	718370	0	718370	0	718370	0	2	2				2827	2925;21030	True;True	3154;22912	7989;58069	7833;58284	7833;58284
Q07960	ARHGAP1	Rho GTPase-activating protein 1 OS=Homo sapiens GN=ARHGAP1 PE=1 SV=1	Rho GTPase-activating protein 1	12	12	12	1	12	12	12	2	12	2	12	2	12	42.1	42.1	42.1	50.435	439	439	0	127.22	By matching	By MS/MS	4.3	42.1	288640000	115530	288520000	131890	286360000	0	29	29				1503	2784;5702;6918;9268;9269;9854;11972;14108;14640;15381;21277;22676	True;True;True;True;True;True;True;True;True;True;True;True	3003;6147;7453;9985;9986;10598;12869;15195;15196;15980;16816;23191;24691;24692	7579;15107;15108;18334;18335;24679;24680;24681;24682;24683;24684;26281;32146;32147;32148;32149;38284;38285;38286;40120;40121;40122;42360;58793;58794;58795;58796;58797;62565;62566;62567;62568	7440;14814;18019;18020;24443;24444;24445;26282;32143;32144;32145;38373;38374;38375;38376;40329;40330;40331;40332;42724;58930;58931;58932;58933;62688;62689;62690;62691;62692	7440;14814;18020;24443;24445;26282;32143;38373;40330;42724;58932;62692	1714;1715	1;299
Q8IWW6	ARHGAP12	Rho GTPase-activating protein 12 OS=Homo sapiens GN=ARHGAP12 PE=1 SV=1	Rho GTPase-activating protein 12	2	2	2	1	2	2	2	0	2	0	2	0	2	3	3	3	96.253	846	846	0.002133	11.117		By MS/MS	0	3	2016700	0	2016700	0	2016700	0	1	1				2001	17344;21480	True;True	18929;23409	47614;59322	47780;59449	47780;59449
Q68EM7	ARHGAP17	Rho GTPase-activating protein 17 OS=Homo sapiens GN=ARHGAP17 PE=1 SV=1	Rho GTPase-activating protein 17	5	5	5	1	5	5	5	0	5	0	5	0	5	10.6	10.6	10.6	95.436	881	881	0	60.303		By MS/MS	0	10.6	57847000	0	57847000	0	57847000	0	9	9				1870	158;5442;13084;18190;18896	True;True;True;True;True	172;5874;14067;19848;20607	448;449;450;451;452;14475;14476;35323;35324;49816;51916	478;479;480;14242;14243;35379;35380;49941;52180	478;14242;35379;49941;52180
Q8N392	ARHGAP18	Rho GTPase-activating protein 18 OS=Homo sapiens GN=ARHGAP18 PE=1 SV=3	Rho GTPase-activating protein 18	2	2	2	1	2	2	2	0	2	0	2	0	2	4.1	4.1	4.1	74.976	663	663	0.00078094	13.785		By MS/MS	0	4.1	2372400	0	2372400	0	2372400	0	2	2				2025	4179;8179	True;True	4517;8813	11219;21789	11005;21487	11005;21487
Q13017	ARHGAP5	Rho GTPase-activating protein 5 OS=Homo sapiens GN=ARHGAP5 PE=1 SV=2	Rho GTPase-activating protein 5	2	2	2	1	2	2	2	0	2	0	2	0	2	3.1	3.1	3.1	172.46	1502	1502	0.00075614	12.973		By MS/MS	0	3.1	20735000	0	20735000	0	20735000	0	2	2				1542	744;775	True;True	807;840	2042;2043;2144	2041;2131	2041;2131
P52565	ARHGDIA	Rho GDP-dissociation inhibitor 1 OS=Homo sapiens GN=ARHGDIA PE=1 SV=3	Rho GDP-dissociation inhibitor 1	9	9	9	1	9	9	9	4	9	4	9	4	9	67.6	67.6	67.6	23.207	204	204	0	82.999	By MS/MS	By MS/MS	37.7	67.6	302930000	955900	301970000	955130	291080000	2	30	32				1179	574;665;7204;9599;17600;17601;18798;20066;20067	True;True;True;True;True;True;True;True;True	631;724;7771;10334;10335;19216;19217;20499;21865;21866	1626;1627;1628;1629;1630;1631;1854;1855;1856;19127;19128;25533;25534;25535;25536;25537;25538;25539;25540;25541;25542;25543;48323;48324;48325;51689;51690;55261;55262;55263;55264;55265	1640;1641;1642;1643;1644;1645;1646;1856;1857;1858;18787;18788;18789;18790;18791;25361;25362;25363;25364;25365;25366;25367;48554;48555;48556;51932;55692;55693;55694;55695;55696;55697	1646;1856;18791;25361;48554;48556;51932;55694;55697	1364	145
Q92888	ARHGEF1	Rho guanine nucleotide exchange factor 1 OS=Homo sapiens GN=ARHGEF1 PE=1 SV=2	Rho guanine nucleotide exchange factor 1	5	5	5	1	5	5	5	0	5	0	5	0	5	7.8	7.8	7.8	102.43	912	912	0	61.843		By MS/MS	0	7.8	29665000	0	29665000	0	29665000	0	7	7				2143	6605;16100;16589;17443;22703	True;True;True;True;True	7122;17598;18124;19038;24724	17419;17420;44320;44321;45612;47886;62690;62691	17053;17054;44657;44658;45824;48056;62836	17054;44657;45824;48056;62836
O15013	ARHGEF10	Rho guanine nucleotide exchange factor 10 OS=Homo sapiens GN=ARHGEF10 PE=1 SV=4	Rho guanine nucleotide exchange factor 10	7	7	7	1	7	7	7	0	7	0	7	0	7	8.1	8.1	8.1	151.61	1369	1369	0	49.734		By MS/MS	0	8.1	22566000	0	22566000	0	22566000	0	9	9				138	1908;9241;10179;12304;13083;17115;22496	True;True;True;True;True;True;True	2068;9954;10940;13224;14066;18686;24495	5247;24599;27186;33151;33152;35320;35321;35322;47057;62068;62069	5176;24366;27112;33324;35377;35378;47262;62204;62205	5176;24366;27112;33324;35378;47262;62204
Q9NZN5	ARHGEF12	Rho guanine nucleotide exchange factor 12 OS=Homo sapiens GN=ARHGEF12 PE=1 SV=1	Rho guanine nucleotide exchange factor 12	2	2	2	1	2	2	2	0	2	0	2	0	2	2.4	2.4	2.4	173.23	1544	1544	0.00041017	15.745		By MS/MS	0	2.4	1965600	0	1965600	0	1965600	0	2	2				2587	6046;13392	True;True	6525;14399	15996;36167;36168	15674;15675;36237	15674;36237
Q96PE2	ARHGEF17	Rho guanine nucleotide exchange factor 17 OS=Homo sapiens GN=ARHGEF17 PE=1 SV=1	Rho guanine nucleotide exchange factor 17	2	2	2	1	2	2	2	0	2	0	2	0	2	1.4	1.4	1.4	221.67	2063	2063	0.0021322	11.108		By MS/MS	0	1.4	3936400	0	3936400	0	3936400	0	2	2				2255	3034;13390	True;True	3270;14397	8228;36165	8098;36235	8098;36235
Q92974	ARHGEF2	Rho guanine nucleotide exchange factor 2 OS=Homo sapiens GN=ARHGEF2 PE=1 SV=4	Rho guanine nucleotide exchange factor 2	4	4	4	1	4	4	4	0	4	0	4	0	4	4.8	4.8	4.8	111.54	986	986	0	27.512		By MS/MS	0	4.8	25063000	0	25063000	0	25063000	0	4	4				2150	1519;10270;16029;16502	True;True;True;True	1645;11037;17520;18030	4222;27432;44163;45412	4074;27382;44511;45642	4074;27382;44511;45642
Q8TER5	ARHGEF40	Rho guanine nucleotide exchange factor 40 OS=Homo sapiens GN=ARHGEF40 PE=1 SV=3	Rho guanine nucleotide exchange factor 40	2	2	2	1	2	2	2	0	2	0	2	0	2	2.5	2.5	2.5	164.66	1519	1519	0.00074239	12.55		By MS/MS	0	2.5	6538100	0	6538100	0	6538100	0	3	3				2092	1463;15954	True;True	1583;17440	4047;4048;43945;43946	3910;44284;44285	3910;44284
Q9Y4X5	ARIH1	E3 ubiquitin-protein ligase ARIH1 OS=Homo sapiens GN=ARIH1 PE=1 SV=2	E3 ubiquitin-protein ligase ARIH1	2	2	2	1	2	2	2	0	2	0	2	0	2	5	5	5	64.117	557	557	0	25.733		By MS/MS	0	5	6396900	0	6396900	0	6396900	0	3	3				2792	6405;22734	True;True	6912;24756	16912;16913;62860	16582;16583;63138	16582;63138
O95376	ARIH2	E3 ubiquitin-protein ligase ARIH2 OS=Homo sapiens GN=ARIH2 PE=1 SV=1	E3 ubiquitin-protein ligase ARIH2	2	2	2	1	2	2	2	0	2	0	2	0	2	6.7	6.7	6.7	57.818	493	493	0.00079397	14.21		By MS/MS	0	6.7	2303100	0	2303100	0	2303100	0	2	2				359	19409;22517	True;True	21163;24517	53445;62118	53785;62257	53785;62257
P40616	ARL1	ADP-ribosylation factor-like protein 1 OS=Homo sapiens GN=ARL1 PE=1 SV=1	ADP-ribosylation factor-like protein 1	7	7	7	1	7	7	7	1	7	1	7	1	7	63.5	63.5	63.5	20.417	181	181	0	72.536	By MS/MS	By MS/MS	12.7	63.5	134940000	76066	134870000	0	130030000	1	19	20				1003	1122;2777;8668;10220;13312;16031;17260	True;True;True;True;True;True;True	1221;2996;9344;10982;14316;17522;17523;18840	3104;3105;3106;7551;7552;23091;23092;23093;27282;27283;27284;35944;35945;35946;35947;35948;35949;35950;44167;44168;44169;44170;47431;47432	3045;7408;22659;22660;22661;27181;27182;27183;35971;35972;35973;35974;35975;35976;44514;44515;44516;44517;47610;47611	3045;7408;22659;27181;35975;44516;47610	1176	139
Q9NXU5	ARL15	ADP-ribosylation factor-like protein 15 OS=Homo sapiens GN=ARL15 PE=1 SV=1	ADP-ribosylation factor-like protein 15	2	2	2	1	2	2	2	0	2	0	2	0	2	10.8	10.8	10.8	22.876	204	204	0	26.599		By MS/MS	0	10.8	9114000	0	9114000	0	9114000	0	3	3				2567	4172;22354	True;True	4510;24347	11207;11208;61739;61740	10992;10993;61889	10992;61889
P36404	ARL2	ADP-ribosylation factor-like protein 2 OS=Homo sapiens GN=ARL2 PE=1 SV=4	ADP-ribosylation factor-like protein 2	2	2	2	1	2	2	2	1	2	1	2	1	2	11.4	11.4	11.4	20.878	184	184	0.00075672	12.984	By matching	By MS/MS	5.4	11.4	6887000	14519	6872500	0	6872500	0	2	2				967	5727;12772	True;True	6173;13723	15175;15176;15177;34400	14880;14881;34467	14881;34467
P36405	ARL3	ADP-ribosylation factor-like protein 3 OS=Homo sapiens GN=ARL3 PE=1 SV=2	ADP-ribosylation factor-like protein 3	5	5	5	1	5	5	5	1	5	1	5	1	5	43.4	43.4	43.4	20.455	182	182	0	41.557	By matching	By MS/MS	10.4	43.4	149700000	58370	149640000	0	149640000	0	12	12				968	10233;13043;16020;16310;16812	True;True;True;True;True	10996;14024;17509;17821;18366	27340;35216;44129;44130;44131;44895;44896;44897;44898;46237;46238	27287;35275;44479;44480;44481;44482;45194;45195;45196;46414;46415;46416	27287;35275;44481;45194;46416
O75915	ARL6IP5	PRA1 family protein 3 OS=Homo sapiens GN=ARL6IP5 PE=1 SV=1	PRA1 family protein 3	5	5	5	1	5	5	5	2	5	2	5	2	5	28.2	28.2	28.2	21.614	188	188	0	54.313	By MS/MS	By MS/MS	9.6	28.2	425270000	179450	425090000	990260	336120000	1	22	23				309	2445;13541;14125;14183;19443	True;True;True;True;True	2641;14554;15224;15225;15315;21198;21199	6660;6661;6662;6663;36547;36548;36549;38341;38342;38343;38344;38345;38548;38549;38550;53538;53539;53540;53541;53542;53543;53544;53545;53546;53547;53548	6513;6514;6515;6516;36569;36570;38430;38431;38432;38637;38638;53866;53867;53868;53869;53870;53871;53872;53873;53874;53875;53876;53877;53878	6516;36570;38432;38637;53877	184;185	1;162
Q9NVJ2	ARL8B	ADP-ribosylation factor-like protein 8B OS=Homo sapiens GN=ARL8B PE=1 SV=1	ADP-ribosylation factor-like protein 8B	6	6	2	1	6	6	2	1	6	1	6	0	2	44.1	44.1	12.4	21.539	186	186	0	100.6	By MS/MS	By MS/MS	4.8	44.1	187680000	833720	186850000	0	185560000	1	11	12				2548	3760;5352;5469;8810;14499;14931	True;True;True;True;True;True	4049;5778;5901;9495;9496;15771;16326	10068;10069;14197;14561;14562;23489;23490;39542;39543;39544;39545;41000;41001	9777;13939;14322;14323;23040;23041;39637;39638;39639;41187;41188;41189	9777;13939;14323;23041;39638;41187	2194	95
Q7Z3E5	ARMC9	LisH domain-containing protein ARMC9 OS=Homo sapiens GN=ARMC9 PE=1 SV=2	LisH domain-containing protein ARMC9	2	2	2	1	2	2	2	0	2	0	2	0	2	2.9	2.9	2.9	91.761	817	817	0.00078647	13.965		By MS/MS	0	2.9	4006000	0	4006000	0	4006000	0	1	1				1952	5900;7584	True;True	6370;8179	15622;20169;20170	15296;19836	15296;19836
Q9P291	ARMCX1	Armadillo repeat-containing X-linked protein 1 OS=Homo sapiens GN=ARMCX1 PE=1 SV=1	Armadillo repeat-containing X-linked protein 1	2	2	2	1	2	2	2	0	2	0	2	0	2	5.7	5.7	5.7	49.18	453	453	0.00072701	11.879		By MS/MS	0	5.7	1050800	0	1050800	0	1050800	0	3	3				2606	1031;9558	True;True	1121;10292	2841;25412	2808;2809;25254	2808;25254
Q9UH62	ARMCX3	Armadillo repeat-containing X-linked protein 3 OS=Homo sapiens GN=ARMCX3 PE=1 SV=1	Armadillo repeat-containing X-linked protein 3	3	3	3	1	3	3	3	0	3	0	3	0	3	11.3	11.3	11.3	42.5	379	379	0	39.09		By MS/MS	0	11.3	10607000	0	10607000	0	10607000	0	5	5				2645	1366;2001;3670	True;True;True	1482;2164;3949	3774;3775;3776;5452;5453;9858	3644;3645;5377;5378;9588	3644;5378;9588
Q9H993	ARMT1	UPF0364 protein C6orf211 OS=Homo sapiens GN=C6orf211 PE=1 SV=1	Protein-glutamate O-methyltransferase	7	7	7	1	7	7	7	0	7	0	7	0	7	26.8	26.8	26.8	51.172	441	441	0	70.942		By MS/MS	0	26.8	56755000	0	56755000	0	56755000	0	10	10				2461	605;2426;9083;9960;14934;19092;22412	True;True;True;True;True;True;True	663;2621;9785;10712;16329;20816;24405	1720;1721;6600;24241;26566;41006;52510;61869;61870	1725;1726;1727;6467;23894;26517;41194;52839;62005;62006	1725;6467;23894;26517;41194;52839;62006
Q92747	ARPC1A	Actin-related protein 2/3 complex subunit 1A OS=Homo sapiens GN=ARPC1A PE=1 SV=2	Actin-related protein 2/3 complex subunit 1A	8	7	7	1	8	7	7	1	8	1	7	1	7	36.5	30.3	30.3	41.569	370	370	0	53.324	By matching	By MS/MS	4.6	36.5	124160000	36054	124130000	0	119230000	0	10	10				2133	3375;5328;6319;11609;15552;17758;18396;19497	True;True;True;True;True;True;False;True	3642;5754;6815;12485;17001;19385;20065;21256	9107;14132;16691;31151;31152;31153;31154;31155;42786;42787;48708;50384;50385;50386;50387;53701;53702	8900;13876;16371;31013;31014;31015;43129;48891;50496;50497;50498;50499;54009;54010	8900;13876;16371;31015;43129;48891;50497;54009
O15143	ARPC1B	Actin-related protein 2/3 complex subunit 1B OS=Homo sapiens GN=ARPC1B PE=1 SV=3	Actin-related protein 2/3 complex subunit 1B	12	12	11	1	12	12	11	3	12	3	12	3	11	50.5	50.5	44.4	40.949	372	372	0	216.48	By matching	By MS/MS	11.8	50.5	448930000	181610	448750000	202990	448730000	0	29	29				148	2014;2487;2734;5329;6331;9831;14811;15541;18396;19496;20075;20765	True;True;True;True;True;True;True;True;True;True;True;True	2177;2687;2948;5755;6830;10574;16198;16989;20065;21255;21875;22628	5482;5483;6785;6786;6787;7440;7441;14133;14134;14135;14136;14137;16751;16752;16753;26210;26211;40721;40722;42756;42757;42758;42759;50384;50385;50386;50387;53700;55288;55289;57273;57274	5400;5401;6646;6647;6648;7317;13877;13878;13879;16451;16452;26188;26189;40919;40920;43102;43103;43104;43105;50496;50497;50498;50499;54007;54008;55721;55722;57583;57584	5400;6648;7317;13879;16451;26188;40920;43102;50497;54008;55722;57583
O15144	ARPC2	Actin-related protein 2/3 complex subunit 2 OS=Homo sapiens GN=ARPC2 PE=1 SV=1	Actin-related protein 2/3 complex subunit 2	16	16	16	1	16	16	16	6	16	6	16	6	16	68.7	68.7	68.7	34.333	300	300	0	172.22	By MS/MS	By MS/MS	20	68.7	891930000	496100	891430000	1362100	870590000	1	51	52				149	1952;2981;3961;4193;4276;5714;6686;10016;14347;14814;20442;21715;21716;21941;22365;22366	True;True;True;True;True;True;True;True;True;True;True;True;True;True;True;True	2113;3214;3215;4285;4531;4532;4624;6160;7209;10769;15543;15544;16201;22273;23661;23662;23910;24358;24359	5345;5346;8125;8126;8127;8128;8129;8130;8131;8132;8133;10644;10645;10646;11251;11252;11253;11254;11255;11484;11485;11486;11487;11488;11489;15146;15147;15148;17693;17694;17695;26698;26699;26700;26701;26702;26703;26704;39021;39022;39023;39024;39025;39026;40726;40727;40728;56306;56307;60052;60053;60054;60678;60679;60680;60681;61763;61764;61765;61766;61767;61768;61769;61770	5280;5281;8007;8008;8009;8010;8011;8012;8013;8014;8015;10407;10408;10409;10410;11038;11039;11040;11293;11294;11295;11296;11297;11298;11299;14852;14853;17350;17351;26645;26646;26647;26648;39119;39120;39121;39122;40924;40925;40926;56664;56665;60240;60241;60242;60824;60825;60826;60827;61909;61910;61911;61912;61913	5281;8008;10407;11039;11295;14853;17351;26645;39121;40925;56664;60240;60242;60825;61909;61911	90;91;92	1;115;152
O15145	ARPC3	Actin-related protein 2/3 complex subunit 3 OS=Homo sapiens GN=ARPC3 PE=1 SV=3	Actin-related protein 2/3 complex subunit 3	5	5	5	1	5	5	5	3	5	3	5	3	5	39.3	39.3	39.3	20.546	178	178	0	70.942	By MS/MS	By MS/MS	18.5	39.3	284480000	544830	283940000	2013200	240090000	3	26	29				150	2502;4278;5824;12422;15755	True;True;True;True;True	2702;4626;6287;6288;13350;13351;17222	6841;6842;6843;6844;6845;11492;11493;11494;11495;15439;15440;15441;15442;15443;15444;15445;15446;15447;15448;33428;33429;33430;33431;43333;43334;43335;43336;43337	6708;6709;6710;11303;11304;11305;11306;11307;11308;15127;15128;15129;15130;15131;15132;15133;15134;15135;15136;15137;15138;15139;15140;33563;33564;33565;33566;43701;43702;43703	6709;11307;15132;33566;43703	93;94	19;95
P59998	ARPC4	Actin-related protein 2/3 complex subunit 4 OS=Homo sapiens GN=ARPC4 PE=1 SV=3	Actin-related protein 2/3 complex subunit 4	8	8	8	1	8	8	8	4	8	4	8	4	8	66.1	66.1	66.1	19.667	168	168	0	60.677	By MS/MS	By MS/MS	25	66.1	319550000	757510	318790000	1098800	308730000	4	19	23				1251	647;2148;5667;10809;11311;13717;18675;20952	True;True;True;True;True;True;True;True	706;2320;6110;11631;12166;12167;14741;20367;22830	1810;1811;1812;1813;1814;5837;5838;5839;5840;15038;15039;15040;15041;15042;15043;28930;30320;30321;37135;37136;37137;51309;51310;51311;57843;57844;57845	1808;1809;1810;1811;5745;5746;5747;14754;14755;14756;14757;14758;14759;28860;30211;30212;37231;37232;37233;51483;58074;58075;58076	1809;5747;14756;28860;30212;37231;51483;58076	1427;1428;1429	126;139;149
O15511	ARPC5	Actin-related protein 2/3 complex subunit 5 OS=Homo sapiens GN=ARPC5 PE=1 SV=3	Actin-related protein 2/3 complex subunit 5	6	6	5	1	6	6	5	0	6	0	6	0	5	57.6	57.6	52.3	16.32	151	151	0	79.422		By MS/MS	0	57.6	223430000	0	223430000	0	218670000	0	25	25				172	1209;7795;11380;15032;16182;20248	True;True;True;True;True;True	1314;8403;12241;16428;17686;17687;22062	3306;3307;3308;20780;20781;20782;30473;30474;30475;30476;30477;30478;41239;41240;44561;44562;44563;55749;55750	3224;3225;3226;3227;20523;20524;20525;20526;30362;30363;30364;30365;30366;30367;30368;30369;30370;41431;41432;44903;44904;44905;44906;44907;56145	3224;20526;30362;41431;44907;56145	101	51
P49407	ARRB1	Beta-arrestin-1 OS=Homo sapiens GN=ARRB1 PE=1 SV=2	Beta-arrestin-1	2	2	2	1	2	2	2	0	2	0	2	0	2	7.9	7.9	7.9	47.065	418	418	0.00080354	14.722		By MS/MS	0	7.9	8137400	0	8137400	0	8137400	0	2	2				1102	329;3213	True;True	356;3467	964;8671	1005;8491	1005;8491
P15289	ARSA	Arylsulfatase A OS=Homo sapiens GN=ARSA PE=1 SV=3	Arylsulfatase A;Arylsulfatase A component B;Arylsulfatase A component C	2	2	2	1	2	2	2	0	2	0	2	0	2	8.1	8.1	8.1	53.588	507	507	0	19.482		By MS/MS	0	8.1	13396000	0	13396000	0	13396000	0	2	2				648	4003;7920	True;True	4329;8540	10789;10790;21093;21094;21095;21096	10557;20801;20802;20803	10557;20803
Q13510	ASAH1	Acid ceramidase OS=Homo sapiens GN=ASAH1 PE=1 SV=5	Acid ceramidase;Acid ceramidase subunit alpha;Acid ceramidase subunit beta	5	5	5	1	5	5	5	0	5	0	5	0	5	16.5	16.5	16.5	44.659	395	395	0	40.122		By MS/MS	0	16.5	34962000	0	34962000	0	34962000	0	7	7				1593	2956;6112;13684;19611;22170	True;True;True;True;True	3186;6594;14707;21377;24150	8042;8043;16154;16155;37037;37038;53999;54000;61248;61249	7888;7889;15829;37110;54336;61415;61416	7889;15829;37110;54336;61415
Q9ULH1	ASAP1	Arf-GAP with SH3 domain, ANK repeat and PH domain-containing protein 1 OS=Homo sapiens GN=ASAP1 PE=1 SV=4	Arf-GAP with SH3 domain, ANK repeat and PH domain-containing protein 1	2	2	2	1	2	2	2	0	2	0	2	0	2	3.3	3.3	3.3	125.5	1129	1129	0.00080451	14.794		By MS/MS	0	3.3	2412800	0	2412800	0	2412800	0	2	2				2699	1177;7750	True;True	1280;8356	3238;20687	3164;20442	3164;20442
Q9H1I8	ASCC2	Activating signal cointegrator 1 complex subunit 2 OS=Homo sapiens GN=ASCC2 PE=1 SV=3	Activating signal cointegrator 1 complex subunit 2	2	2	2	1	2	2	2	0	2	0	2	0	2	5.7	5.7	5.7	86.359	757	757	0.0004223	17.284		By MS/MS	0	5.7	5012000	0	5012000	0	5012000	0	3	3				2411	4535;11120	True;True	4896;11969	12103;12104;29852	11895;11896;29794	11895;29794
Q8N3C0	ASCC3	Activating signal cointegrator 1 complex subunit 3 OS=Homo sapiens GN=ASCC3 PE=1 SV=3	Activating signal cointegrator 1 complex subunit 3	6	6	6	1	6	6	6	0	6	0	6	0	6	3.7	3.7	3.7	251.46	2202	2202	0	38.019		By MS/MS	0	3.7	31280000	0	31280000	0	31280000	0	7	7				2026	453;1580;1648;12533;18434;19730	True;True;True;True;True;True	496;1720;1794;13470;20104;21502	1301;4390;4536;33718;50490;50491;54309;54310	1324;4248;4382;33854;50604;54649;54650	1324;4248;4382;33854;50604;54650
P04424	ASL	Argininosuccinate lyase OS=Homo sapiens GN=ASL PE=1 SV=4	Argininosuccinate lyase	4	4	4	1	4	4	4	0	4	0	4	0	4	11	11	11	51.657	464	464	0	29.476		By MS/MS	0	11	14310000	0	14310000	0	14310000	0	5	5				438	1399;6992;10404;13026	True;True;True;True	1515;7544;11196;14006	3862;18550;18551;27808;27809;35169	3729;3730;18213;27745;35239	3730;18213;27745;35239
O95671	ASMTL	N-acetylserotonin O-methyltransferase-like protein OS=Homo sapiens GN=ASMTL PE=1 SV=3	N-acetylserotonin O-methyltransferase-like protein	7	7	7	1	7	7	7	0	7	0	7	0	7	16.7	16.7	16.7	68.856	621	621	0	61.813		By MS/MS	0	16.7	23972000	0	23972000	0	23972000	0	12	12				367	527;1924;7123;7172;11015;21467;21805	True;True;True;True;True;True;True	580;2084;7685;7738;11857;23396;23766	1483;1484;5276;5277;18916;19024;19025;29569;29570;29571;59288;59289;60335	1495;1496;5204;18586;18691;29537;29538;29539;29540;29541;59413;60522	1496;5204;18586;18691;29538;59413;60522
O43681	ASNA1	ATPase ASNA1 OS=Homo sapiens GN=ASNA1 PE=1 SV=2	ATPase ASNA1	7	7	7	1	7	7	7	1	7	1	7	1	7	37.1	37.1	37.1	38.792	348	348	0	59.179	By matching	By MS/MS	2.6	37.1	155670000	38407	155630000	0	152680000	0	15	15				209	137;6167;9631;11880;12776;21254;22553	True;True;True;True;True;True;True	147;6657;10369;12774;13729;23168;24556;24557	370;371;372;16316;16317;16318;25618;25619;31937;31938;31939;31940;34415;58737;58738;62228;62229;62230	407;408;409;410;411;16020;25435;25436;25437;31942;34484;58890;62352;62353;62354	407;16020;25436;31942;34484;58890;62354	111	306
P08243	ASNS	Asparagine synthetase [glutamine-hydrolyzing] OS=Homo sapiens GN=ASNS PE=1 SV=4	Asparagine synthetase [glutamine-hydrolyzing]	12	12	12	1	12	12	12	1	12	1	12	1	12	31.4	31.4	31.4	64.369	561	561	0	108.6	By matching	By MS/MS	1.8	31.4	138260000	30154	138230000	0	135040000	0	21	21				512	514;4677;4782;5776;9861;10188;10268;11605;14558;15557;19639;22053	True;True;True;True;True;True;True;True;True;True;True;True	567;5046;5161;5162;6223;10606;10949;11035;12481;15865;17009;21405;24024	1457;12467;12468;12758;12759;12760;12761;15287;15288;26304;26305;27205;27429;27430;31144;31145;39812;39813;39814;42808;42809;54064;60997;60998;60999	1471;1472;12252;12253;12549;12550;12551;14985;14986;26300;26301;27124;27379;27380;31009;39973;39974;43165;43166;54395;54396;61185	1472;12252;12549;14986;26300;27124;27379;31009;39974;43166;54396;61185	443;444	290;538
Q12797	ASPH	Aspartyl/asparaginyl beta-hydroxylase OS=Homo sapiens GN=ASPH PE=1 SV=3	Aspartyl/asparaginyl beta-hydroxylase	15	15	15	1	15	15	15	4	15	4	15	4	15	29.9	29.9	29.9	85.862	758	758	0	189.44	By MS/MS	By MS/MS	10.7	29.9	320470000	667430	319800000	1010700	318510000	5	36	41				1526	1740;3074;5223;7344;7438;8189;9437;11418;12211;14862;17867;18184;18379;20954;21929	True;True;True;True;True;True;True;True;True;True;True;True;True;True;True	1891;3310;5637;7922;8025;8824;10164;12281;13128;16251;19498;19842;20048;22832;23897	4790;8311;13851;19542;19808;19809;19810;19811;19812;21823;21824;21825;25090;25091;30565;32921;32922;32923;32924;32925;32926;32927;40828;40829;48979;48980;49804;50339;50340;50341;50342;50343;57848;60651;60652;60653	4649;8180;13620;19234;19533;19534;19535;19536;21512;24930;24931;30447;33123;33124;33125;33126;33127;33128;33129;33130;33131;33132;33133;41018;41019;41020;49122;49123;49932;49933;50447;50448;50449;50450;50451;50452;50453;50454;58078;60803;60804;60805	4649;8180;13620;19234;19534;21512;24931;30447;33130;41019;49122;49932;50449;58078;60803
Q9BZE9	ASPSCR1	Tether containing UBX domain for GLUT4 OS=Homo sapiens GN=ASPSCR1 PE=1 SV=1	Tether containing UBX domain for GLUT4	2	2	2	1	2	2	2	0	2	0	2	0	2	6.3	6.3	6.3	60.182	553	553	0.00076923	13.395		By MS/MS	0	6.3	736030	0	736030	0	736030	0	2	2				2382	135;205	True;True	145;227	365;582	401;605	401;605
P00966	ASS1	Argininosuccinate synthase OS=Homo sapiens GN=ASS1 PE=1 SV=2	Argininosuccinate synthase	15	15	15	1	15	15	15	2	15	2	15	2	15	48.1	48.1	48.1	46.53	412	412	0	151.08	By matching	By MS/MS	3.6	48.1	483290000	416600	482870000	448400	455550000	0	38	38				411	1698;3362;5160;6131;6534;6684;8513;9597;11397;14863;15418;19483;20426;21430;22584	True;True;True;True;True;True;True;True;True;True;True;True;True;True;True	1846;3628;3629;5566;6615;6616;7047;7207;9178;10332;12260;16252;16858;16859;21241;22254;23356;24590	4669;9071;9072;9073;9074;13677;13678;13679;13680;16198;16199;16200;17246;17687;17688;22687;22688;22689;22690;25527;25528;25529;25530;30527;40830;40831;40832;42451;42452;42453;42454;42455;53664;56254;56255;56256;59192;59193;62298;62299	4501;8864;8865;8866;8867;8868;8869;13459;13460;13461;13462;15866;15867;15868;15869;15870;16877;17346;17347;22288;22289;22290;25357;25358;30415;41021;41022;42808;42809;42810;42811;42812;53980;56618;56619;59315;59316;62424	4501;8867;13460;15870;16877;17346;22289;25357;30415;41021;42810;53980;56619;59315;62424	252;253;254	181;252;377
Q9NVI7	ATAD3A	ATPase family AAA domain-containing protein 3A OS=Homo sapiens GN=ATAD3A PE=1 SV=2	ATPase family AAA domain-containing protein 3A	9;3	9;3	7;2	2	9	9	7	0	9	0	9	0	7	20.7	20.7	17.4	71.368	634	634;411	0	73.611		By MS/MS	0	20.7	82866000	0	82866000	0	77715000	0	15	15				2547	2867;3570;6977;8231;10362;10792;12837;15096;18523	True;True;True;True;True;True;True;True;True	3089;3090;3845;7528;8867;11152;11613;13792;16497;20197	7809;7810;9611;18504;21943;21944;27715;27716;28895;28896;34578;34579;41406;41407;50724;50725	7654;7655;9377;18164;21612;21613;27660;27661;28834;28835;34641;41597;41598;50845;50846	7655;9377;18164;21613;27661;28834;34641;41597;50845	2191;2192;2193	80;398;518
O95260	ATE1	Arginyl-tRNA--protein transferase 1 OS=Homo sapiens GN=ATE1 PE=1 SV=2	Arginyl-tRNA--protein transferase 1	2	2	2	1	2	2	2	0	2	0	2	0	2	5.6	5.6	5.6	59.09	518	518	0.0007446	12.6		By MS/MS	0	5.6	24626000	0	24626000	0	24626000	0	2	2				348	7015;17699	True;True	7568;19322	18610;48551;48552	18270;48758	18270;48758
Q9NT62	ATG3	Ubiquitin-like-conjugating enzyme ATG3 OS=Homo sapiens GN=ATG3 PE=1 SV=1	Ubiquitin-like-conjugating enzyme ATG3	3	3	3	1	3	3	3	0	3	0	3	0	3	11.1	11.1	11.1	35.864	314	314	0	20.24		By MS/MS	0	11.1	7328500	0	7328500	0	7328500	0	3	3				2528	1321;14556;18725	True;True;True	1437;15863;20418	3663;3664;39809;51439	3546;39970;51609	3546;39970;51609
Q9Y4P1	ATG4B	Cysteine protease ATG4B OS=Homo sapiens GN=ATG4B PE=1 SV=2	Cysteine protease ATG4B	4	4	4	1	4	4	4	0	4	0	4	0	4	15	15	15	44.294	393	393	0	28.299		By MS/MS	0	15	11639000	0	11639000	0	11639000	0	4	4				2788	14057;18815;19634;22791	True;True;True;True	15118;20516;21400;24814	38114;51732;54054;63025	38209;51974;54387;63294	38209;51974;54387;63294
Q9H1Y0	ATG5	Autophagy protein 5 OS=Homo sapiens GN=ATG5 PE=1 SV=2	Autophagy protein 5	3	3	3	1	3	3	3	1	3	1	3	1	3	12.4	12.4	12.4	32.447	275	275	0.00043898	18.941	By MS/MS	By MS/MS	3.3	12.4	3159400	54701	3104700	0	3104700	0	2	2				2412	4665;6313;14618	True;True;True	5033;6809;15950	12429;16685;40063;40064;40065	12215;16364;40271	12215;16364;40271
O95352	ATG7	Ubiquitin-like modifier-activating enzyme ATG7 OS=Homo sapiens GN=ATG7 PE=1 SV=1	Ubiquitin-like modifier-activating enzyme ATG7	6	6	6	1	6	6	6	0	6	0	6	0	6	11.5	11.5	11.5	77.959	703	703	0	56.028		By MS/MS	0	11.5	34875000	0	34875000	0	34875000	0	8	8				356	61;4366;8968;12130;12739;17481	True;True;True;True;True;True	68;4717;9661;13040;13690;19081	167;11708;11709;11710;23945;23946;32694;34295;34296;47962	182;11522;11523;23512;23513;32906;34357;48132	182;11522;23513;32906;34357;48132
P31939	ATIC	Bifunctional purine biosynthesis protein PURH OS=Homo sapiens GN=ATIC PE=1 SV=3	Bifunctional purine biosynthesis protein PURH;Phosphoribosylaminoimidazolecarboxamide formyltransferase;IMP cyclohydrolase	27	27	27	1	27	27	27	2	27	2	27	2	27	67.7	67.7	67.7	64.615	592	592	0	312.65	By matching	By MS/MS	2.5	67.7	396060000	41989	396010000	59482	384130000	0	52	52				921	610;784;1325;1326;1664;3695;4483;6430;8845;9374;11697;13075;13561;14032;14600;15027;15108;15267;17494;17726;19739;20104;21713;21729;21794;22426;22871	True;True;True;True;True;True;True;True;True;True;True;True;True;True;True;True;True;True;True;True;True;True;True;True;True;True;True	668;849;1441;1442;1810;3976;4839;4840;6938;9532;10098;12582;14058;14577;15081;15927;15928;16423;16509;16680;19097;19350;21511;21906;21907;23658;23659;23680;23754;24422;24423;24899	1731;1732;1733;2161;2162;3670;3671;3672;3673;3674;4568;9911;9912;11966;11967;11968;16973;16974;16975;16976;23601;23602;23603;24898;24899;24900;24901;31496;31497;31498;35298;36602;36603;38025;39992;39993;39994;39995;41226;41227;41430;41431;41834;41835;41836;48000;48620;48621;54339;54340;54341;54342;54343;55353;55354;55355;60047;60048;60103;60104;60298;61906;61907;61908;61909;63210;63211	1736;1737;1738;2143;3551;3552;4410;9635;9636;9637;9638;11741;11742;11743;11744;16637;16638;16639;16640;23195;24679;24680;24681;24682;24683;31543;31544;35360;36616;38113;40215;40216;40217;41422;41616;42023;48192;48817;48818;54691;54692;54693;55789;55790;60236;60237;60290;60485;62044;62045;62046;62047;62048;63475	1736;2143;3551;3552;4410;9635;11743;16638;23195;24682;31543;35360;36616;38113;40216;41422;41616;42023;48192;48818;54693;55789;60236;60290;60485;62046;63475	1043;1044;1045;1046;1047	60;158;210;288;312
Q8WXF7	ATL1	Atlastin-1 OS=Homo sapiens GN=ATL1 PE=1 SV=1	Atlastin-1	6;1	6;1	6;1	2	6	6	6	0	6	0	6	0	6	14.9	14.9	14.9	63.543	558	558;583	0	80.76		By MS/MS	0	14.9	17716000	0	17716000	0	17716000	0	8	8				2105	934;2997;10221;10988;17884;19877	True;True;True;True;True;True	1013;3231;10983;11823;19519;21661	2585;2586;2587;8167;8168;27285;27286;29475;49038;49039;54723	2547;2548;8044;27184;29435;29436;49186;49187;55134	2547;8044;27184;29436;49186;55134
Q6DD88	ATL3	Atlastin-3 OS=Homo sapiens GN=ATL3 PE=1 SV=1	Atlastin-3	17	17	17	1	17	17	17	2	17	2	17	2	17	44.2	44.2	44.2	60.541	541	541	0	271.86	By matching	By MS/MS	3.9	44.2	569050000	69445	568980000	89908	547170000	0	49	49				1872	1235;3537;3620;4079;5331;6103;7393;7949;8226;10987;11375;12496;15785;17883;20071;22747;22748	True;True;True;True;True;True;True;True;True;True;True;True;True;True;True;True;True	1343;3812;3898;4412;5757;6585;7974;7975;8569;8862;11822;12236;13431;17254;19517;19518;21870;21871;24769;24770	3430;9539;9540;9541;9733;10992;10993;10994;10995;14140;16138;16139;16140;19687;19688;19689;19690;19691;19692;19693;21162;21163;21164;21165;21166;21935;29473;29474;30464;30465;33641;43410;43411;43412;49031;49032;49033;49034;49035;49036;49037;55275;55276;55277;55278;55279;55280;55281;62886;62887;62888;62889;62890;62891	3329;9316;9317;9318;9483;10778;10779;10780;13882;13883;15813;15814;19398;19399;19400;19401;19402;19403;19404;19405;20864;20865;20866;21604;29432;29433;29434;30354;33788;43765;49180;49181;49182;49183;49184;49185;55703;55704;55705;55706;55707;55708;55709;55710;55711;63163;63164;63165;63166;63167	3329;9316;9483;10779;13882;15814;19402;20865;21604;29434;30354;33788;43765;49184;55705;63163;63165	1953;1954;1955	19;141;343
Q8NB49	ATP11C	Phospholipid-transporting ATPase IG OS=Homo sapiens GN=ATP11C PE=1 SV=3	Phospholipid-transporting ATPase IG	6	6	6	1	6	6	6	0	6	0	6	0	6	6.3	6.3	6.3	129.48	1132	1132	0	40.694		By MS/MS	0	6.3	21238000	0	21238000	0	21238000	0	10	10				2040	7399;10374;13169;18399;19486;21392	True;True;True;True;True;True	7982;11164;14159;20068;21244;23316	19713;27741;27742;27743;35552;35553;35554;50393;50394;53670;59095	19427;27688;35615;35616;35617;50507;50508;53984;59223;59224	19427;27688;35615;50508;53984;59223
Q9HD20	ATP13A1	Manganese-transporting ATPase 13A1 OS=Homo sapiens GN=ATP13A1 PE=1 SV=2	Manganese-transporting ATPase 13A1	6	6	6	1	6	6	6	0	6	0	6	0	6	8.2	8.2	8.2	132.95	1204	1204	0	47.06		By MS/MS	0	8.2	30674000	0	30674000	0	30674000	0	8	8				2486	17;1371;3628;14922;20866;21829	True;True;True;True;True;True	18;1487;3906;16317;22739;23790	69;70;3781;3782;9756;9757;40982;57603;57604;60396	75;3650;3651;3652;9504;41169;57867;57868;60571	75;3650;9504;41169;57868;60571
Q9H7F0	ATP13A3	Probable cation-transporting ATPase 13A3 OS=Homo sapiens GN=ATP13A3 PE=1 SV=4	Probable cation-transporting ATPase 13A3	3	3	3	1	3	3	3	0	3	0	3	0	3	2.9	2.9	2.9	138.04	1226	1226	0.00043554	18.675		By MS/MS	0	2.9	3824100	0	3824100	0	3824100	0	2	2				2454	5848;8158;19379	True;True;True	6313;8792;21133	15507;21748;53359	15191;21451;53687	15191;21451;53687
P05023	ATP1A1	Sodium/potassium-transporting ATPase subunit alpha-1 OS=Homo sapiens GN=ATP1A1 PE=1 SV=1	Sodium/potassium-transporting ATPase subunit alpha-1	38;13;5;2	38;13;5;2	27;3;0;0	4	38	38	27	16	38	16	38	8	27	42.7	42.7	28.5	112.89	1023	1023;1013;1029;1035	0	323.31	By MS/MS	By MS/MS	20.3	42.7	2428700000	2847400	2425800000	6876500	2350800000	13	160	173				444	353;434;2210;2281;2628;2821;3326;3572;3573;3882;6026;6027;8112;8778;10839;11010;12435;12986;14586;14648;15055;15173;15313;15398;15537;15909;16147;16148;17966;19550;20218;20738;22054;22323;22324;22445;22469;22743	True;True;True;True;True;True;True;True;True;True;True;True;True;True;True;True;True;True;True;True;True;True;True;True;True;True;True;True;True;True;True;True;True;True;True;True;True;True	382;477;2389;2468;2834;3042;3589;3847;3848;4192;4193;6502;6503;8743;9460;11665;11849;11850;13364;13963;15906;15907;15992;15993;16454;16581;16746;16747;16836;16837;16984;16985;17389;17390;17648;17649;19612;21312;22030;22597;22598;24025;24316;24317;24442;24467;24765	1019;1020;1021;1246;1247;1248;6008;6009;6010;6011;6012;6227;6228;6229;6230;6231;6232;7114;7678;7679;7680;7681;8980;9613;9614;9615;9616;9617;9618;9619;9620;9621;9622;10439;10440;10441;10442;10443;10444;15948;15949;15950;15951;15952;21636;21637;21638;23403;23404;23405;23406;23407;23408;23409;23410;29007;29008;29009;29551;29552;29553;29554;29555;33457;33458;33459;33460;33461;35061;35062;35063;35064;…	1057;1058;1269;1270;1271;1272;5896;5897;5898;5899;5900;6120;6121;6122;6123;6124;6958;6959;7524;7525;7526;7527;8778;9379;9380;9381;9382;9383;10208;10209;10210;10211;10212;10213;10214;15627;15628;15629;15630;15631;15632;15633;21337;21338;22962;22963;22964;22965;22966;22967;22968;22969;22970;28935;28936;29518;29519;29520;29521;29522;33584;33585;33586;33587;33588;35132;35133;35134;35135;35136;35137;3…	1058;1271;5897;6122;6959;7526;8778;9379;9383;10211;15627;15633;21338;22965;28935;29522;33587;35136;40187;40391;41476;41779;42563;42777;43095;44151;44824;44829;49414;54194;56076;57499;61187;61802;61803;62083;62124;63157	294;295;296;297;298;299;300;301;302;303	164;178;386;391;507;615;673;734;748;949
P05026	ATP1B1	Sodium/potassium-transporting ATPase subunit beta-1 OS=Homo sapiens GN=ATP1B1 PE=1 SV=1	Sodium/potassium-transporting ATPase subunit beta-1	7	7	7	1	7	7	7	1	7	1	7	1	7	33.3	33.3	33.3	35.061	303	303	0	59.688	By matching	By MS/MS	4.6	33.3	155870000	17278	155860000	0	153460000	0	14	14				445	2479;3014;18544;18848;20019;20567;22681	True;True;True;True;True;True;True	2676;3249;3250;20222;20550;21818;22405;24697	6746;8198;8199;8200;50786;50787;51805;55124;55125;55126;55127;55128;56678;56679;56680;56681;56682;62577;62578	6577;8071;8072;50901;50902;52064;55552;55553;55554;55555;57026;57027;57028;62698	6577;8072;50901;52064;55553;57027;62698	304	121
P54709	ATP1B3	Sodium/potassium-transporting ATPase subunit beta-3 OS=Homo sapiens GN=ATP1B3 PE=1 SV=1	Sodium/potassium-transporting ATPase subunit beta-3	9	9	9	1	9	9	9	4	9	4	9	4	9	46.6	46.6	46.6	31.512	279	279	0	96.745	By MS/MS	By MS/MS	17.9	46.6	385920000	233720	385680000	478060	370610000	2	27	29				1214	4082;8434;10031;12059;14906;15896;17130;17131;17804	True;True;True;True;True;True;True;True;True	4415;4416;9091;9092;10786;12960;16299;16300;17375;18702;18703;19433	10998;10999;11000;11001;22487;22488;22489;22490;26775;26776;32374;32375;40939;40940;40941;40942;40943;40944;40945;43752;43753;43754;43755;43756;47093;47094;47095;47096;47097;48815;48816;48817	10783;10784;10785;22106;22107;22108;22109;22110;26719;26720;32384;32385;32386;41128;41129;41130;41131;41132;41133;41134;44112;44113;44114;47295;47296;47297;48981;48982;48983	10784;22108;26719;32385;41134;44114;47295;47297;48982	1393;1394;1395	82;157;209
P16615	ATP2A2	Sarcoplasmic/endoplasmic reticulum calcium ATPase 2 OS=Homo sapiens GN=ATP2A2 PE=1 SV=1	Sarcoplasmic/endoplasmic reticulum calcium ATPase 2	23;9;4	23;9;4	23;9;4	3	23	23	23	3	23	3	23	3	23	32.5	32.5	32.5	114.76	1042	1042;1001;1043	0	250.34	By MS/MS	By MS/MS	3.6	32.5	375690000	256590	375430000	338960	365130000	1	57	58				668	600;1577;1601;2645;3529;5046;5107;9905;10563;10644;10835;11019;11685;14755;15303;15712;17814;18659;19758;20230;20309;20506;20736	True;True;True;True;True;True;True;True;True;True;True;True;True;True;True;True;True;True;True;True;True;True;True	658;1716;1717;1746;2851;3803;5446;5447;5512;10653;11365;11456;11659;11660;11861;11862;12568;16134;16725;16726;17177;19443;20348;20349;21531;22042;22128;22342;22594	1711;4381;4382;4383;4384;4385;4439;7144;9514;13417;13418;13419;13553;13554;26414;26415;26416;28244;28245;28246;28496;28497;28992;28993;28994;28995;29578;29579;29580;29581;31466;40526;40527;40528;42114;42115;42116;42117;42118;42119;43222;48832;48833;48834;48835;51251;51252;51253;51254;51255;51256;54393;54394;54395;54396;55705;55706;55707;55917;55918;56477;56478;56479;57173;57174	1718;4236;4237;4238;4239;4240;4241;4242;4243;4292;6988;9293;9294;13203;13204;13205;13339;13340;26397;26398;26399;28152;28153;28452;28918;28919;28920;28921;28922;28923;28924;29549;29550;31515;40731;40732;42499;42500;42501;42502;43600;48995;48996;48997;48998;51435;51436;51437;51438;51439;54739;54740;56109;56110;56111;56306;56307;56820;56821;56822;57492;57493	1718;4240;4292;6988;9293;13204;13340;26397;28153;28452;28920;29549;31515;40731;42502;43600;48995;51438;54739;56110;56307;56821;57492	646;647;648;649;650;651	207;220;575;699;719;732
P20020	ATP2B1	Plasma membrane calcium-transporting ATPase 1 OS=Homo sapiens GN=ATP2B1 PE=1 SV=3	Plasma membrane calcium-transporting ATPase 1	30;10	16;1	16;1	2	30	16	16	6	30	2	16	2	16	28.9	17.5	17.5	138.75	1258	1258;1243	0	178.62	By MS/MS	By MS/MS	6.7	28.9	271480000	111580	271360000	132470	267740000	1	31	32				758	507;1745;4691;4758;4788;6708;7609;7946;8056;8470;9161;9572;9573;10488;11011;11603;14653;14697;14927;16717;16718;17685;18224;18812;18813;19082;19604;19786;21965;22388	False;True;True;True;False;False;True;True;True;False;False;False;False;True;False;False;True;False;True;False;False;True;True;True;True;True;True;True;False;False	560;1896;5061;5136;5168;7234;8205;8566;8681;9130;9868;9869;10306;10307;11286;11851;11852;12479;16000;16060;16322;18263;18264;19305;19884;20513;20514;20806;21370;21561;21562;23934;24381	1444;1445;1446;4798;12511;12512;12703;12704;12770;12771;12772;12773;12774;12775;17750;17751;20230;21152;21153;21154;21155;21156;21437;21438;21439;22568;24383;24384;24385;24386;24387;24388;24389;24390;24391;25446;25447;25448;25449;25450;25451;25452;25453;25454;25455;25456;25457;28056;28057;29556;29557;29558;29559;31141;31142;40182;40183;40332;40333;40334;40990;40991;45986;45987;45988;45989;45990;4…	1460;1461;4655;12304;12305;12484;12485;12561;12562;12563;12564;12565;12566;12567;17401;17402;19911;20853;20854;20855;20856;20857;21107;21108;22180;24068;24069;24070;24071;24072;24073;24074;24075;24076;25278;25279;25280;25281;25282;25283;25284;25285;25286;25287;27976;27977;27978;27979;29523;29524;29525;31006;31007;40411;40412;40557;40558;40559;41178;41179;46165;46166;46167;46168;46169;46170;46171;…	1460;4655;12304;12484;12564;17402;19911;20855;21108;22180;24071;25279;25284;27976;29525;31007;40412;40558;41178;46169;46172;48717;50001;51971;51972;52796;54318;54816;60948;61956	864;865;866;867	333;466;640;814
P23634	ATP2B4	Plasma membrane calcium-transporting ATPase 4 OS=Homo sapiens GN=ATP2B4 PE=1 SV=2	Plasma membrane calcium-transporting ATPase 4	39	39	25	1	39	39	25	10	39	10	39	6	25	35.6	35.6	24.1	137.92	1241	1241	0	323.31	By MS/MS	By MS/MS	11.1	35.6	1541200000	1239200	1539900000	1391300	1495900000	10	112	122				816	507;756;2613;2872;4788;5177;6708;7482;7764;8055;8470;9161;9572;9573;11011;11146;11603;12546;14652;14697;15024;15619;16260;16717;16718;17562;17686;18811;19438;19439;19480;19481;19482;19607;19608;19785;20865;21965;22388	True;True;True;True;True;True;True;True;True;True;True;True;True;True;True;True;True;True;True;True;True;True;True;True;True;True;True;True;True;True;True;True;True;True;True;True;True;True;True	560;819;2818;3095;5168;5585;5586;7234;8072;8371;8680;9130;9868;9869;10306;10307;11851;11852;11995;12479;13483;15999;16060;16420;17074;17769;18263;18264;19170;19306;19307;19308;20512;21192;21193;21238;21239;21240;21373;21374;21559;21560;22738;23934;24381	1444;1445;1446;2079;7088;7819;7820;7821;7822;7823;7824;12770;12771;12772;12773;12774;12775;13728;13729;13730;13731;13732;13733;17750;17751;19941;19942;20715;21434;21435;21436;22568;24383;24384;24385;24386;24387;24388;24389;24390;24391;25446;25447;25448;25449;25450;25451;25452;25453;25454;25455;25456;25457;29556;29557;29558;29559;29900;29901;31141;31142;33748;40181;40332;40333;40334;41215;41216;41…	1460;1461;2067;6937;7663;7664;7665;12561;12562;12563;12564;12565;12566;12567;13502;13503;13504;13505;13506;17401;17402;19644;19645;20466;21105;21106;22180;24068;24069;24070;24071;24072;24073;24074;24075;24076;25278;25279;25280;25281;25282;25283;25284;25285;25286;25287;29523;29524;29525;29841;29842;31006;31007;33884;40410;40557;40558;40559;41410;41411;41412;41413;41414;41415;43353;45044;45045;4504…	1460;2067;6937;7665;12564;13505;17402;19644;20466;21106;22180;24071;25279;25284;29525;29841;31007;33884;40410;40558;41411;43353;45046;46169;46172;48377;48722;51969;53859;53860;53976;53977;53978;54324;54329;54812;57866;60948;61956	865;866;930;931;932;933	27;255;263;456;630;802
P98194	ATP2C1	Calcium-transporting ATPase type 2C member 1 OS=Homo sapiens GN=ATP2C1 PE=1 SV=3	Calcium-transporting ATPase type 2C member 1	4	4	4	1	4	4	4	0	4	0	4	0	4	8.2	8.2	8.2	100.58	919	919	0	38.725		By MS/MS	0	8.2	11400000	0	11400000	0	11400000	0	4	4				1427	83;1915;8501;19615	True;True;True;True	92;2075;9165;21381	236;5261;5262;22655;54006	279;5189;22257;54343	279;5189;22257;54343
P25705	ATP5A1	ATP synthase subunit alpha, mitochondrial OS=Homo sapiens GN=ATP5A1 PE=1 SV=1	ATP synthase subunit alpha, mitochondrial	24	24	24	1	24	24	24	13	24	13	24	13	24	52.1	52.1	52.1	59.75	553	553	0	323.31	By MS/MS	By MS/MS	26.9	52.1	2030700000	4388600	2026300000	13218000	1959900000	19	86	105				833	2247;5449;5637;6295;6687;8322;8935;8981;10191;11924;12510;13531;13929;15660;15742;16191;18391;18968;19020;19580;20585;21055;21749;21750	True;True;True;True;True;True;True;True;True;True;True;True;True;True;True;True;True;True;True;True;True;True;True;True	2430;5881;6077;6791;7210;8965;8966;9626;9678;10952;12819;13445;14544;14969;17118;17119;17208;17696;17697;20060;20681;20737;20738;21344;22425;22938;23701;23702	6125;6126;6127;14501;14502;14503;14504;14965;14966;14967;14968;14969;16651;16652;16653;16654;16655;16656;17696;17697;17698;22161;22162;22163;22164;22165;22166;23859;23860;23989;23990;23991;23992;23993;27213;27214;27215;27216;27217;27218;27219;27220;32052;32053;32054;32055;32056;33677;36529;36530;37752;43066;43067;43068;43069;43070;43071;43298;43299;43300;43301;44574;44575;44576;44577;44578;44579;…	6016;6017;6018;14270;14271;14272;14693;14694;16323;16324;16325;16326;16327;16328;16329;16330;17352;17353;17354;17355;21791;21792;21793;21794;21795;21796;23418;23419;23573;23574;23575;23576;23577;27128;27129;27130;27131;27132;27133;27134;27135;27136;32055;32056;32057;32058;33813;36553;37849;37850;43439;43440;43441;43442;43443;43444;43445;43446;43447;43448;43449;43669;44918;44919;44920;44921;44922;…	6018;14272;14693;16326;17353;21793;23418;23574;27132;32058;33813;36553;37849;43449;43669;44921;50475;52404;52589;54265;57070;58335;60348;60354	946;947;948;949	51;95;105;479
P06576	ATP5B	ATP synthase subunit beta, mitochondrial OS=Homo sapiens GN=ATP5B PE=1 SV=3	ATP synthase subunit beta, mitochondrial	27	27	27	1	27	27	27	11	27	11	27	11	27	76.6	76.6	76.6	56.559	529	529	0	323.31	By MS/MS	By MS/MS	32.7	76.6	4634600000	4675900	4629900000	8387900	4067200000	14	158	172				465	1007;1050;4067;5259;6950;7237;7843;8573;9915;10310;10330;10449;10452;10817;11167;13784;16119;17817;17818;19078;19538;19803;19998;20000;20873;20874;21753	True;True;True;True;True;True;True;True;True;True;True;True;True;True;True;True;True;True;True;True;True;True;True;True;True;True;True	1091;1142;4399;5679;5680;7491;7492;7806;8454;8455;9243;10663;11080;11081;11111;11112;11244;11245;11246;11249;11640;12017;14815;17617;17618;17619;19446;19447;19448;20801;20802;21299;21580;21581;21790;21792;21793;22746;22747;23705	2782;2783;2885;2886;2887;2888;2889;2890;2891;2892;2893;2894;2895;2896;10954;10955;10956;10957;10958;13971;13972;13973;13974;13975;13976;13977;13978;18416;18417;19248;19249;19250;19251;19252;19253;19254;19255;19256;19257;19258;19259;20892;20893;20894;20895;22834;22835;22836;22837;22838;22839;26441;26442;26443;26444;26445;27539;27540;27541;27542;27543;27544;27545;27620;27621;27622;27623;27624;27625…	2745;2746;2747;2852;2853;2854;2855;2856;2857;2858;2859;2860;2861;2862;10730;10731;10732;10733;10734;10735;10736;13719;13720;13721;13722;13723;13724;13725;13726;13727;18088;18089;18090;18949;18950;18951;18952;18953;18954;18955;18956;18957;18958;18959;20618;20619;20620;20621;20622;22421;22422;22423;22424;22425;22426;22427;26416;26417;26418;26419;26420;27485;27486;27487;27488;27489;27490;27563;27564…	2747;2862;10736;13725;18089;18950;20621;22425;26420;27489;27570;27878;27884;28883;29890;37425;44723;49002;49013;52774;54107;54885;55394;55406;57894;57900;60359	332;333;334;335;336;337;338;339;340;341;342;343;344	113;145;174;176;217;250;272;339;342;408;443;478;509
P36542	ATP5C1	ATP synthase subunit gamma, mitochondrial OS=Homo sapiens GN=ATP5C1 PE=1 SV=1	ATP synthase subunit gamma, mitochondrial	10	10	10	1	10	10	10	1	10	1	10	1	10	42.3	42.3	42.3	32.996	298	298	0	80.719	By MS/MS	By MS/MS	3.7	42.3	240040000	101720	239940000	0	236250000	1	18	19				970	5634;6401;8156;9184;10967;11305;13610;14613;17301;19065	True;True;True;True;True;True;True;True;True;True	6074;6906;6907;8789;9894;11801;12160;14627;15944;18883;20787	14960;14961;14962;16897;16898;21728;21729;24446;29417;29418;30302;36736;36737;40045;40046;40047;47521;47522;47523;47524;47525;52434;52435;52436	14688;14689;14690;16573;16574;21421;21422;24140;29381;29382;30195;36740;40258;40259;47698;47699;52735;52736;52737	14688;16574;21422;24140;29382;30195;36740;40259;47699;52737	1126	129
P30049	ATP5D	ATP synthase subunit delta, mitochondrial OS=Homo sapiens GN=ATP5D PE=1 SV=2	ATP synthase subunit delta, mitochondrial	2	2	2	1	2	2	2	0	2	0	2	0	2	13.7	13.7	13.7	17.49	168	168	0.00041667	16.598		By MS/MS	0	13.7	59591000	0	59591000	0	59591000	0	4	4				890	1731;9649	True;True	1881;10388	4767;4768;4769;4770;25672	4624;4625;4626;4627;25502	4624;25502
P24539	ATP5F1	ATP synthase F(0) complex subunit B1, mitochondrial OS=Homo sapiens GN=ATP5F1 PE=1 SV=2	ATP synthase F(0) complex subunit B1, mitochondrial	10	10	10	1	10	10	10	3	10	3	10	3	10	41	41	41	28.908	256	256	0	124.3	By matching	By MS/MS	14.8	41	207440000	174440	207270000	806400	206640000	0	18	18				822	5973;9382;11114;11564;11799;15333;15962;18098;22421;22433	True;True;True;True;True;True;True;True;True;True	6446;6447;10108;11963;12434;12691;16768;17448;19753;24417;24430	15810;15811;15812;24975;24976;24977;29839;30993;31753;42240;42241;43971;43972;43973;43974;49622;61895;61896;61897;61924;61925;61926	15501;15502;15503;24810;24811;29783;30879;31781;42611;42612;44310;44311;49761;62032;62033;62034;62035;62062	15501;24811;29783;30879;31781;42611;44310;49761;62033;62062	935	215
O75947	ATP5H	ATP synthase subunit d, mitochondrial OS=Homo sapiens GN=ATP5H PE=1 SV=3	ATP synthase subunit d, mitochondrial	12	12	12	1	12	12	12	3	12	3	12	3	12	78.9	78.9	78.9	18.491	161	161	0	116.44	By matching	By MS/MS	17.4	78.9	200840000	364470	200480000	776260	187570000	0	28	28				311	907;908;10847;11433;11450;15199;17023;18526;19090;21337;22714;22836	True;True;True;True;True;True;True;True;True;True;True;True	984;985;11674;12298;12316;16608;16609;18588;20200;20814;23258;24735;24861	2521;2522;2523;2524;2525;29026;30601;30648;30649;41658;41659;41660;41661;41662;41663;41664;41665;41666;41667;46834;46835;46836;46837;46838;50728;50729;50730;52507;58957;58958;62707;62708;63123;63124;63125;63126	2492;2493;28950;30483;30514;30515;41842;41843;41844;41845;41846;41847;41848;41849;47039;47040;47041;47042;50849;50850;52836;59088;59089;62853;63386;63387;63388;63389	2492;2493;28950;30483;30515;41848;47039;50850;52836;59089;62853;63389	186	131
P56385	ATP5I	ATP synthase subunit e, mitochondrial OS=Homo sapiens GN=ATP5I PE=1 SV=2	ATP synthase subunit e, mitochondrial	3	3	3	1	3	3	3	1	3	1	3	1	3	31.9	31.9	31.9	7.9331	69	69	0.00043573	18.688	By matching	By MS/MS	15.9	31.9	38939000	43498	38895000	0	38895000	0	4	4				1241	5518;14684;21316	True;True;True	5954;16043;23235	14662;14663;40290;58887;58888;58889	14410;40510;59020;59021	14410;40510;59021	1425	1
P18859	ATP5J	ATP synthase-coupling factor 6, mitochondrial OS=Homo sapiens GN=ATP5J PE=1 SV=1	ATP synthase-coupling factor 6, mitochondrial	2	2	2	1	2	2	2	0	2	0	2	0	2	31.5	31.5	31.5	12.587	108	108	0	27.564		By MS/MS	0	31.5	45537000	0	45537000	0	44677000	0	7	7				747	16435;16637	True;True	17953;17954;18175	45239;45240;45241;45242;45243;45754;45755;45756;45757	45488;45489;45490;45935;45936;45937;45938	45490;45936	855;856	81;87
P56134	ATP5J2	ATP synthase subunit f, mitochondrial OS=Homo sapiens GN=ATP5J2 PE=1 SV=3	ATP synthase subunit f, mitochondrial	4	4	4	1	4	4	4	1	4	1	4	1	4	41.5	41.5	41.5	10.918	94	94	0	33.014	By MS/MS	By MS/MS	13.8	41.5	205190000	290120	204900000	0	173360000	1	7	8				1238	2036;2037;3198;12152	True;True;True;True	2199;2200;3450;13064;13065	5529;5530;5531;8622;8623;8624;8625;8626;32778;32779;32780;32781	5437;5438;5439;5440;8451;8452;8453;8454;32990;32991	5438;5440;8453;32990	1423	32
O75964	ATP5L	ATP synthase subunit g, mitochondrial OS=Homo sapiens GN=ATP5L PE=1 SV=3	ATP synthase subunit g, mitochondrial	3	3	3	1	3	3	3	2	3	2	3	2	3	32	32	32	11.428	103	103	0	23.1	By matching	By MS/MS	23.3	32	106880000	143570	106740000	629120	106260000	0	6	6				315	10893;11587;20337	True;True;True	11722;12457;22158	29161;29162;29163;29164;31056;56002;56003;56004;56005	29113;29114;30933;56368;56369;56370	29113;30933;56369
P48047	ATP5O	ATP synthase subunit O, mitochondrial OS=Homo sapiens GN=ATP5O PE=1 SV=1	ATP synthase subunit O, mitochondrial	6	6	6	1	6	6	6	3	6	3	6	3	6	39	39	39	23.277	213	213	0	64.739	By MS/MS	By MS/MS	15.5	39	248370000	233510	248140000	1453400	246920000	2	13	15				1077	7166;7768;17355;18775;19921;22207	True;True;True;True;True;True	7731;8375;18941;20475;21706;24189	19013;19014;19015;20723;20724;47638;47639;47640;47641;47642;51580;51581;51582;51583;54822;54823;54824;61356;61357;61358	18681;18682;20474;20475;47802;47803;47804;47805;51755;51756;51757;55237;55238;61518;61519	18681;20475;47804;51756;55237;61519
Q15904	ATP6AP1	V-type proton ATPase subunit S1 OS=Homo sapiens GN=ATP6AP1 PE=1 SV=2	V-type proton ATPase subunit S1	2	2	2	1	2	2	2	0	2	0	2	0	2	5.5	5.5	5.5	52.025	470	470	0.00075988	13.098		By MS/MS	0	5.5	4358900	0	4358900	0	4358900	0	3	3				1745	4374;6595	True;True	4725;7111	11725;17399;17400	11533;17030;17031	11533;17030
Q93050	ATP6V0A1	V-type proton ATPase 116 kDa subunit a isoform 1 OS=Homo sapiens GN=ATP6V0A1 PE=2 SV=3	V-type proton ATPase 116 kDa subunit a isoform 1	10	10	10	1	10	10	10	1	10	1	10	1	10	14.8	14.8	14.8	96.412	837	837	0	109.69	By matching	By MS/MS	2.2	14.8	33743000	65262	33677000	0	33677000	0	15	15				2154	1627;1983;3748;5419;8654;9561;11030;12175;14566;15926	True;True;True;True;True;True;True;True;True;True	1772;2144;4034;5849;9330;10295;11874;13090;15876;17407	4489;4490;5413;10041;10042;14382;23056;23057;25420;29607;29608;32841;39838;43855;43856	4333;4334;5341;9754;9755;14101;22627;25258;29574;29575;33055;39997;39998;44200;44201	4333;5341;9754;14101;22627;25258;29574;33055;39998;44201
P27449	ATP6V0C	V-type proton ATPase 16 kDa proteolipid subunit OS=Homo sapiens GN=ATP6V0C PE=1 SV=1	V-type proton ATPase 16 kDa proteolipid subunit	2	2	2	1	2	2	2	0	2	0	2	0	2	31.6	31.6	31.6	15.736	155	155	0.00078585	13.947		By MS/MS	0	31.6	1806800	0	1806800	0	1806800	0	3	3				853	17457;17483	True;True	19053;19083	47909;47965	48075;48076;48135	48075;48135	981	23
P61421	ATP6V0D1	V-type proton ATPase subunit d 1 OS=Homo sapiens GN=ATP6V0D1 PE=1 SV=1	V-type proton ATPase subunit d 1	8	8	8	1	8	8	8	2	8	2	8	2	8	33.6	33.6	33.6	40.329	351	351	0	81.7	By MS/MS	By MS/MS	6.8	33.6	153130000	75317	153060000	0	153060000	1	18	19				1290	383;977;6711;12346;12661;13975;15595;17338	True;True;True;True;True;True;True;True	421;1058;7237;13271;13606;15015;17048;18923	1121;1122;2687;2688;2689;2690;2691;17755;33245;33246;34103;34104;34105;34106;37869;37870;37871;37872;42901;42902;47601;47602;47603;47604;47605	1161;1162;2641;2642;2643;2644;17407;33418;33419;33420;34193;34194;37975;37976;43259;47769;47770;47771;47772	1161;2643;17407;33420;34194;37975;43259;47769
P38606	ATP6V1A	V-type proton ATPase catalytic subunit A OS=Homo sapiens GN=ATP6V1A PE=1 SV=2	V-type proton ATPase catalytic subunit A	26	26	26	1	26	26	26	3	26	3	26	3	26	62.4	62.4	62.4	68.303	617	617	0	323.31	By MS/MS	By MS/MS	6.8	62.4	669440000	277340	669160000	327650	656970000	2	67	69				988	1189;1260;1261;1962;2986;3184;3865;5285;5286;5402;7230;8348;8726;8821;10148;11491;11890;12437;17171;18647;19794;20537;20590;20854;22003;22803	True;True;True;True;True;True;True;True;True;True;True;True;True;True;True;True;True;True;True;True;True;True;True;True;True;True	1293;1369;1370;2123;3220;3434;3435;4169;4170;5706;5707;5831;7799;8997;8998;9404;9507;10907;12357;12784;13366;18746;20332;20333;21571;22374;22430;22726;23972;24827	3262;3263;3264;3487;3488;5378;8142;8584;8585;8586;10388;10389;10390;14033;14034;14035;14036;14329;14330;14331;14332;14333;14334;19234;19235;22248;22249;22250;22251;23235;23236;23522;23523;27103;27104;30769;31967;31968;33471;33472;33473;47185;47186;47187;47188;51209;51210;51211;51212;51213;51214;54498;54499;54500;54501;56585;56586;56587;56741;56742;56743;56744;57566;57567;57568;57569;57570;60849;6…	3188;3189;3190;3382;3383;3384;5311;5312;8023;8413;8414;8415;10166;10167;10168;13778;13779;13780;13781;14051;14052;14053;14054;14055;14056;14057;14058;14059;18938;18939;21876;21877;22794;22795;23074;23075;27034;27035;27036;30660;31965;33598;33599;33600;47378;47379;47380;51395;51396;51397;51398;51399;51400;54857;56920;56921;57080;57081;57082;57083;57084;57828;57829;57830;57831;61024;63331;63332;633…	3190;3382;3384;5311;8023;8414;10168;13778;13779;14057;18939;21877;22794;23075;27035;30660;31965;33599;47379;51397;54857;56921;57084;57831;61024;63333	1149;1150;1151;1152;1153	284;296;318;346;368
P21281	ATP6V1B2	V-type proton ATPase subunit B, brain isoform OS=Homo sapiens GN=ATP6V1B2 PE=1 SV=3	V-type proton ATPase subunit B, brain isoform	16;4	16;4	16;4	2	16	16	16	4	16	4	16	4	16	55.2	55.2	55.2	56.5	511	511;513	0	219.17	By MS/MS	By MS/MS	9.6	55.2	547150000	277200	546880000	326310	539890000	3	44	47				776	2418;2428;8432;10433;10983;11059;11535;14979;15028;16291;16953;17087;17468;19552;19832;22184	True;True;True;True;True;True;True;True;True;True;True;True;True;True;True;True	2613;2623;9089;11227;11817;11818;11904;12403;16375;16424;17800;18513;18654;18655;19066;21314;21611;24164	6571;6572;6573;6574;6602;6603;6604;6605;22484;22485;27903;27904;29460;29461;29462;29463;29464;29465;29684;29685;30897;41106;41107;41108;41109;41228;41229;41230;41231;44833;44834;44835;44836;44837;46588;46589;46590;46591;46983;46984;46985;47933;53858;53859;53860;54601;54602;61285;61286;61287;61288	6431;6432;6433;6434;6435;6436;6437;6438;6439;6469;6470;6471;22101;22102;22103;27829;29420;29421;29422;29423;29424;29425;29426;29427;29636;30787;41291;41292;41423;41424;41425;45136;45137;45138;46757;47195;47196;47197;48101;54196;54197;54987;54988;54989;61448;61449;61450	6437;6470;22101;27829;29425;29636;30787;41292;41423;45137;46757;47196;48101;54197;54987;61448	888;889	180;254
P21283	ATP6V1C1	V-type proton ATPase subunit C 1 OS=Homo sapiens GN=ATP6V1C1 PE=1 SV=4	V-type proton ATPase subunit C 1	7	7	7	1	7	7	7	0	7	0	7	0	7	22.8	22.8	22.8	43.941	382	382	0	78.232		By MS/MS	0	22.8	27533000	0	27533000	0	27533000	0	10	10				777	3193;8363;9556;16750;18233;18715;18834	True;True;True;True;True;True;True	3445;9014;10290;18300;19897;20408;20536	8605;8606;22282;22283;25409;25410;46083;49935;49936;51412;51782	8433;21906;25251;25252;46268;46269;50063;50064;51580;52039	8433;21906;25252;46269;50064;51580;52039
Q9Y5K8	ATP6V1D	V-type proton ATPase subunit D OS=Homo sapiens GN=ATP6V1D PE=1 SV=1	V-type proton ATPase subunit D	5	5	5	1	5	5	5	1	5	1	5	1	5	34.4	34.4	34.4	28.262	247	247	0	40.06	By MS/MS	By MS/MS	6.5	34.4	87506000	0	87506000	0	87506000	1	8	9				2799	125;3964;7196;9717;21171	True;True;True;True;True	135;4288;7763;10457;23078	351;352;10652;10653;19094;19095;19096;25828;58489	388;389;10417;10418;10419;18754;18755;18756;25663;58663	388;10418;18755;25663;58663
P36543	ATP6V1E1	V-type proton ATPase subunit E 1 OS=Homo sapiens GN=ATP6V1E1 PE=1 SV=1	V-type proton ATPase subunit E 1	12;3	12;3	12;3	2	12	12	12	1	12	1	12	1	12	57.5	57.5	57.5	26.145	226	226;226	0	82.918	By MS/MS	By MS/MS	4	57.5	156340000	127330	156210000	0	150970000	1	19	20				971	557;1477;1871;3007;7447;9219;10519;11729;14888;14889;16004;21519	True;True;True;True;True;True;True;True;True;True;True;True	613;1598;2028;3242;8034;9930;11319;12615;12616;16280;16281;17492;23452	1590;1591;4083;4084;4085;5130;8186;8187;19826;24552;28141;28142;31571;31572;31573;31574;31575;40891;40892;40893;44084;44085;59407;59408	1600;1601;3943;3944;3945;5044;8059;19547;24306;28055;31610;31611;31612;31613;31614;41077;41078;44424;59528;59529	1601;3944;5044;8059;19547;24306;28055;31613;41077;41078;44424;59529	1127;1128;1129;1130	15;16;207;208
Q16864	ATP6V1F	V-type proton ATPase subunit F OS=Homo sapiens GN=ATP6V1F PE=1 SV=2	V-type proton ATPase subunit F	2	2	2	1	2	2	2	0	2	0	2	0	2	30.3	30.3	30.3	13.37	119	119	0	30.869		By MS/MS	0	30.3	11051000	0	11051000	0	11051000	0	2	2				1782	4343;12381	True;True	4694;13306	11663;11664;33315	11480;33483	11480;33483
O75348	ATP6V1G1	V-type proton ATPase subunit G 1 OS=Homo sapiens GN=ATP6V1G1 PE=1 SV=3	V-type proton ATPase subunit G 1	4;1	4;1	4;1	2	4	4	4	1	4	1	4	1	4	49.2	49.2	49.2	13.757	118	118;118	0	62.034	By MS/MS	By MS/MS	9.3	49.2	144330000	60595	144270000	0	144270000	2	9	11				276	2009;3129;4970;14633	True;True;True;True	2172;3375;5361;15972	5470;5471;5472;5473;8453;13215;13216;13217;13218;13219;40106;40107	5390;5391;5392;8311;12994;12995;12996;12997;12998;40313;40314	5390;8311;12997;40313
Q9UI12	ATP6V1H	V-type proton ATPase subunit H OS=Homo sapiens GN=ATP6V1H PE=1 SV=1	V-type proton ATPase subunit H	10	10	10	1	10	10	10	1	10	1	10	1	10	31.3	31.3	31.3	55.882	483	483	0	100.92	By matching	By MS/MS	1.9	31.3	83377000	22034	83355000	0	80845000	0	16	16				2660	6050;7495;12159;12660;12929;16089;16108;16334;21495;22656	True;True;True;True;True;True;True;True;True;True	6529;8086;13072;13605;13901;13902;17586;17606;17845;23424;24670	16004;19966;32795;32796;34101;34102;34878;34879;44303;44338;44339;44954;44955;44956;44957;59350;59351;62513;62514;62515	15682;15683;19664;33003;33004;33005;34192;34946;34947;44641;44677;45250;45251;45252;59480;62634	15683;19664;33003;34192;34946;44641;44677;45250;59480;62634	2256	460
Q04656	ATP7A	Copper-transporting ATPase 1 OS=Homo sapiens GN=ATP7A PE=1 SV=3	Copper-transporting ATPase 1	2	2	2	1	2	2	2	0	2	0	2	0	2	2	2	2	163.37	1500	1500	0.00076482	13.278		By MS/MS	0	2	1317400	0	1317400	0	1317400	0	2	2				1477	5765;19021	True;True	6212;20739	15261;52304	14955;52592	14955;52592
P98198	ATP8B2	Phospholipid-transporting ATPase ID OS=Homo sapiens GN=ATP8B2 PE=1 SV=2	Phospholipid-transporting ATPase ID	2	2	2	1	2	2	2	0	2	0	2	0	2	2.6	2.6	2.6	137.44	1209	1209	0.000815	15.382		By MS/MS	0	2.6	3069400	0	3069400	0	3069400	0	2	2				1428	1843;2410	True;True	1999;2605	5052;6552	4951;6412	4951;6412
O43861	ATP9B	Probable phospholipid-transporting ATPase IIB OS=Homo sapiens GN=ATP9B PE=2 SV=4	Probable phospholipid-transporting ATPase IIB	4	4	2	1	4	4	2	0	4	0	4	0	2	4.3	4.3	2.4	129.3	1147	1147	0	27.993		By MS/MS	0	4.3	6068400	0	6068400	0	6068400	0	3	3				225	1498;7666;18149;18780	True;True;True;True	1621;8264;19804;20480	4131;20454;49719;51591	3987;20229;49855;51766	3987;20229;49855;51766
Q9Y679	AUP1	Ancient ubiquitous protein 1 OS=Homo sapiens GN=AUP1 PE=1 SV=1	Ancient ubiquitous protein 1	2	2	2	1	2	2	2	0	2	0	2	0	2	6.5	6.5	6.5	53.028	476	476	0.00075103	12.842		By MS/MS	0	6.5	3691700	0	3691700	0	3691700	0	3	3				2821	6393;13105	True;True	6896;14090	16883;35383	16563;35454;35455	16563;35454
P61769	B2M	Beta-2-microglobulin OS=Homo sapiens GN=B2M PE=1 SV=1	Beta-2-microglobulin;Beta-2-microglobulin form pI 5.3	4	4	4	1	4	4	4	2	4	2	4	2	4	37.8	37.8	37.8	13.714	119	119	0	41.47	By MS/MS	By MS/MS	16.8	37.8	1338200000	3220600	1334900000	6036100	1332100000	3	13	16				1299	9722;17908;20319;21201	True;True;True;True	10462;19550;22138;23110	25840;49102;49103;49104;49105;55934;55935;55936;55937;55938;55939;55940;55941;58559;58560;58561;58562;58563;58564;58565	25675;49254;49255;49256;49257;56320;56321;56322;56323;56324;56325;58723;58724;58725;58726;58727	25675;49257;56320;58723
O95816	BAG2	BAG family molecular chaperone regulator 2 OS=Homo sapiens GN=BAG2 PE=1 SV=1	BAG family molecular chaperone regulator 2	8	8	8	1	8	8	8	1	8	1	8	1	8	51.2	51.2	51.2	23.772	211	211	0	82.195	By MS/MS	By MS/MS	5.2	51.2	192180000	83453	192100000	0	170180000	1	20	21				377	4624;5401;6878;7094;10009;12649;16267;17519	True;True;True;True;True;True;True;True	4989;5829;5830;7411;7656;10762;13594;17776;19124;19125	12307;14327;14328;18205;18206;18846;18847;18848;26679;26680;34069;34070;34071;34072;44747;44748;48072;48073;48074	12087;14049;14050;17885;17886;18520;18521;18522;26629;26630;34162;34163;34164;34165;45054;45055;45056;48257;48258;48259;48260	12087;14050;17886;18520;26629;34163;45054;48259	212;213	69;136
O95817	BAG3	BAG family molecular chaperone regulator 3 OS=Homo sapiens GN=BAG3 PE=1 SV=3	BAG family molecular chaperone regulator 3	2	2	2	1	2	2	2	0	2	0	2	0	2	6.3	6.3	6.3	61.594	575	575	0.0008016	14.637		By MS/MS	0	6.3	2210900	0	2210900	0	2210900	0	4	4				378	5649;21308	True;True	6089;23227	15000;15001;58874	14717;14718;59008;59009	14717;59008
Q9UL15	BAG5	BAG family molecular chaperone regulator 5 OS=Homo sapiens GN=BAG5 PE=1 SV=1	BAG family molecular chaperone regulator 5	4	4	4	1	4	4	4	1	3	1	3	1	3	15	15	15	51.199	447	447	0	30.923	By MS/MS	By MS/MS	3.8	11.2	32895000	36186	32859000	0	32859000	1	4	5				2689	2435;9719;18862;22549	True;True;True;True	2631;10459;20566;24552	6632;25831;25832;25833;51841;62222	6490;25666;25667;52092;62346	6490;25666;52092;62346
P46379	BAG6	Large proline-rich protein BAG6 OS=Homo sapiens GN=BAG6 PE=1 SV=2	Large proline-rich protein BAG6	5	5	5	1	5	5	5	0	5	0	5	0	5	7.3	7.3	7.3	119.41	1132	1132	0	35.165		By MS/MS	0	7.3	23294000	0	23294000	0	23294000	0	4	4				1057	953;12448;12677;14222;22950	True;True;True;True;True	1033;13380;13622;15369;24981	2633;33495;33496;34142;38705;63417	2590;33623;34223;38815;63677	2590;33623;34223;38815;63677	1216	1
Q16611	BAK1	Bcl-2 homologous antagonist/killer OS=Homo sapiens GN=BAK1 PE=1 SV=1	Bcl-2 homologous antagonist/killer	2	2	2	1	2	2	2	0	2	0	2	0	2	16.6	16.6	16.6	23.408	211	211	0.00079681	14.325		By MS/MS	0	16.6	2644900	0	2644900	0	2644900	0	2	2				1762	1943;16053	True;True	2104;17548	5323;44226	5246;44560	5246;44560
O75531	BANF1	Barrier-to-autointegration factor OS=Homo sapiens GN=BANF1 PE=1 SV=1	Barrier-to-autointegration factor;Barrier-to-autointegration factor, N-terminally processed	3	3	3	1	3	3	3	2	2	2	2	2	2	40.4	40.4	40.4	10.058	89	89	0	27.259	By MS/MS	By MS/MS	40.4	27	95769000	311740	95458000	0	76059000	2	7	9				291	2522;3212;15883	True;True;True	2723;3465;3466;17362	6892;8663;8664;8665;8666;8667;8668;8669;8670;43720	6754;8484;8485;8486;8487;8488;8489;8490;44088	6754;8488;44088	169	15
P80723	BASP1	Brain acid soluble protein 1 OS=Homo sapiens GN=BASP1 PE=1 SV=2	Brain acid soluble protein 1	13	13	13	1	13	13	13	2	13	2	13	2	13	73.6	73.6	73.6	22.693	227	227	0	179.35	By MS/MS	By MS/MS	16.7	73.6	779870000	296250	779580000	334810	775820000	2	55	57				1407	92;578;579;655;1680;1780;1781;5496;6095;6245;11355;17092;18806	True;True;True;True;True;True;True;True;True;True;True;True;True	101;635;636;714;1827;1931;1932;5930;6576;6738;12214;18660;20507	257;258;259;260;261;1641;1642;1643;1644;1831;1832;1833;1834;1835;1836;1837;1838;4603;4604;4605;4885;4886;4887;4888;14627;14628;16120;16121;16122;16123;16512;16513;30418;30419;46995;46996;51717	294;295;296;297;298;299;300;301;1653;1654;1655;1656;1657;1658;1828;1829;1830;1831;1832;1833;1834;1835;1836;1837;1838;1839;4447;4448;4449;4450;4451;4452;4782;4783;4784;4785;4786;14378;14379;15795;15796;15797;15798;15799;15800;15801;16195;16196;16197;16198;30307;30308;30309;47205;47206;47207;51961	298;1656;1658;1834;4452;4782;4783;14378;15798;16195;30307;47207;51961
Q07812	BAX	Apoptosis regulator BAX OS=Homo sapiens GN=BAX PE=1 SV=1	Apoptosis regulator BAX	4	4	4	1	4	4	4	1	4	1	4	1	4	29.7	29.7	29.7	21.184	192	192	0	36.207	By matching	By MS/MS	5.7	29.7	55275000	92202	55183000	0	46980000	0	11	11				1499	9865;14289;14328;18969	True;True;True;True	10610;10611;15471;15472;15519;15520;20682	26315;26316;26317;26318;38887;38888;38889;38890;38970;38971;38972;38973;52129;52130	26308;26309;26310;38986;38987;38988;38989;39061;39062;39063;52406	26308;38988;39062;52406	1707;1708;1709	38;74;79
Q8NFJ9	BBS1	Bardet-Biedl syndrome 1 protein OS=Homo sapiens GN=BBS1 PE=1 SV=1	Bardet-Biedl syndrome 1 protein	2	2	2	1	2	2	2	0	2	0	2	0	2	5.7	5.7	5.7	65.083	593	593	0	26.411		By MS/MS	0	5.7	1425900	0	1425900	0	1425900	0	5	5				2064	59;6181	True;True	66;6672	162;163;16357	175;176;177;16055;16056	176;16055
Q3SYG4	BBS9	Protein PTHB1 OS=Homo sapiens GN=BBS9 PE=1 SV=1	Protein PTHB1	2	2	2	1	2	2	2	0	2	0	2	0	2	4.2	4.2	4.2	99.279	887	887	0.00041408	16.217		By MS/MS	0	4.2	696020000	0	696020000	0	678380000	0	4	4				1798	5967;12932	True;True	6440;13905	15801;34886;34887;34888;34889	15493;34951;34952;34953	15493;34951
Q9UHQ4	BCAP29	B-cell receptor-associated protein 29 OS=Homo sapiens GN=BCAP29 PE=1 SV=2	B-cell receptor-associated protein 29	2	2	2	1	2	2	2	0	2	0	2	0	2	10	10	10	28.32	241	241	0.00081202	15.287		By MS/MS	0	10	7072900	0	7072900	0	7072900	0	2	2				2654	1814;18270	True;True	1968;19935	4973;50010	4868;50129	4868;50129
P51572	BCAP31	B-cell receptor-associated protein 31 OS=Homo sapiens GN=BCAP31 PE=1 SV=3	B-cell receptor-associated protein 31	4	4	4	1	4	4	4	1	4	1	4	1	4	14.6	14.6	14.6	27.991	246	246	0	34.581	By matching	By MS/MS	4.1	14.6	59448000	410280	59038000	0	59038000	0	6	6				1161	15930;21226;22642;22643	True;True;True;True	17412;23136;23137;23138;24652;24653	43875;58637;58638;58639;62460;62461;62462	44225;58790;58791;58792;62576;62577	44225;58791;62576;62577	1356;1357	89;94
P54687	BCAT1	Branched-chain-amino-acid aminotransferase, cytosolic OS=Homo sapiens GN=BCAT1 PE=1 SV=3	Branched-chain-amino-acid aminotransferase, cytosolic	6	6	6	1	6	6	6	0	6	0	6	0	6	20.7	20.7	20.7	42.966	386	386	0	40.572		By MS/MS	0	20.7	45225000	0	45225000	0	45225000	0	9	9				1213	2147;3697;5074;7757;12079;22619	True;True;True;True;True;True	2319;3978;5478;8363;12986;24626	5836;9914;9915;9916;13476;20700;32531;32532;62383;62384	5744;9640;9641;9642;13261;20453;20454;32702;32703;62506;62507	5744;9641;13261;20454;32702;62507
P12694	BCKDHA	2-oxoisovalerate dehydrogenase subunit alpha, mitochondrial OS=Homo sapiens GN=BCKDHA PE=1 SV=2	2-oxoisovalerate dehydrogenase subunit alpha, mitochondrial	3	3	3	1	3	3	3	0	3	0	3	0	3	9.2	9.2	9.2	50.47	445	445	0.00043478	18.649		By MS/MS	0	9.2	2078400	0	2078400	0	2078400	0	3	3				602	2213;15331;16189	True;True;True	2392;16766;17694	6019;6020;42236;44572	5907;42608;44915	5907;42608;44915
Q9Y276	BCS1L	Mitochondrial chaperone BCS1 OS=Homo sapiens GN=BCS1L PE=1 SV=1	Mitochondrial chaperone BCS1	4	4	4	1	4	4	4	0	4	0	4	0	4	17.2	17.2	17.2	47.534	419	419	0	29.641		By MS/MS	0	17.2	25915000	0	25915000	0	25915000	0	6	6				2733	12976;13571;19495;20421	True;True;True;True	13953;14587;21254;22249	35041;36640;36641;53699;56245	35114;35115;36662;54005;54006;56608	35114;36662;54005;56608
Q9BUT1	BDH2	3-hydroxybutyrate dehydrogenase type 2 OS=Homo sapiens GN=BDH2 PE=1 SV=2	3-hydroxybutyrate dehydrogenase type 2	6	6	6	1	6	6	6	0	6	0	6	0	6	40	40	40	26.724	245	245	0	50.841		By MS/MS	0	40	54086000	0	54086000	0	54086000	0	6	6				2350	2673;11786;16230;17450;18401;20717	True;True;True;True;True;True	2881;12676;17739;19046;20070;22569	7225;31715;44657;44658;47898;50397;50398;57095	7072;31746;44986;44987;48066;50511;57421	7072;31746;44987;48066;50511;57421	2131	131
Q8TD16	BICD2	Protein bicaudal D homolog 2 OS=Homo sapiens GN=BICD2 PE=1 SV=1	Protein bicaudal D homolog 2	26	26	25	1	26	26	25	15	23	15	23	15	22	40.2	40.2	38.8	93.532	824	824	0	323.31	By MS/MS	By MS/MS	21.8	35.3	175330000	4340300	170990000	10222000	165100000	25	34	59				2082	416;893;2555;4187;5236;5418;8520;9484;10457;11100;11930;12810;13201;13417;13552;13804;15646;16471;16601;16842;16985;19171;19910;20894;22289;22471	True;True;True;True;True;True;True;True;True;True;True;True;True;True;True;True;True;True;True;True;True;True;True;True;True;True	456;969;2756;4525;5652;5848;9186;10216;11254;11949;12826;13764;14195;14424;14566;14835;17104;17995;18136;18397;18545;20901;21695;22768;24280;24470	1203;2480;6960;11238;13891;13892;13893;13894;14378;14379;14380;14381;22704;25232;27965;27966;27967;27968;27969;27970;27971;29815;29816;32070;32071;32072;34489;34490;34491;34492;34493;34494;34495;34496;35620;35621;36234;36235;36236;36237;36238;36572;36573;36574;36575;37366;37367;37368;43038;43039;43040;43041;43042;45320;45321;45628;46291;46292;46683;52742;52743;54786;57687;57688;61565;61566;62010;…	1230;2451;2452;6814;11021;13657;13658;13659;14096;14097;14098;14099;14100;22306;25059;27893;27894;27895;27896;27897;27898;29761;29762;32075;32076;32077;34543;34544;34545;34546;34547;34548;34549;34550;35682;35683;36298;36299;36590;36591;37467;37468;43413;43414;43415;43416;43417;45554;45838;46463;46464;46837;53047;55209;55210;57949;57950;61718;62140;62141	1230;2452;6814;11021;13658;14099;22306;25059;27898;29762;32077;34546;35682;36298;36590;37468;43416;45554;45838;46464;46837;53047;55209;57950;61718;62141	2006	15
O00499	BIN1	Myc box-dependent-interacting protein 1 OS=Homo sapiens GN=BIN1 PE=1 SV=1	Myc box-dependent-interacting protein 1	2	2	2	1	2	2	2	0	2	0	2	0	2	5.7	5.7	5.7	64.699	593	593	0.00041736	16.685		By MS/MS	0	5.7	10993000	0	10993000	0	10993000	0	2	2				93	13016;13722	True;True	13995;14746	35149;35150;37143;37144	35220;37240	35220;37240
Q13867	BLMH	Bleomycin hydrolase OS=Homo sapiens GN=BLMH PE=1 SV=1	Bleomycin hydrolase	2	2	2	1	2	2	2	0	2	0	2	0	2	8.4	8.4	8.4	52.562	455	455	0.0007902	14.095		By MS/MS	0	8.4	4027300	0	4027300	0	4027300	0	2	2				1618	3257;13024	True;True	3515;14003	8779;35162	8591;35233	8591;35233
Q9UL45	BLOC1S6	Biogenesis of lysosome-related organelles complex 1 subunit 6 OS=Homo sapiens GN=BLOC1S6 PE=1 SV=1	Biogenesis of lysosome-related organelles complex 1 subunit 6	2	2	2	1	2	2	2	0	2	0	2	0	2	24.4	24.4	24.4	19.743	172	172	0.00042319	17.406		By MS/MS	0	24.4	27037000	0	27037000	0	27037000	0	2	2				2692	2268;15950	True;True	2455;17435	6193;43936	6086;44272	6086;44272
P53004	BLVRA	Biliverdin reductase A OS=Homo sapiens GN=BLVRA PE=1 SV=2	Biliverdin reductase A	8	8	8	1	8	8	8	3	8	3	8	3	8	34.5	34.5	34.5	33.428	296	296	0	73.569	By MS/MS	By MS/MS	10.8	34.5	55859000	136000	55723000	381100	47346000	2	9	11				1189	4104;6798;8583;9364;10205;12686;14649;17477	True;True;True;True;True;True;True;True	4440;7328;9253;10087;10088;10966;13631;15994;19076	11052;18019;18020;18021;22857;22858;22859;24877;24878;27249;34159;34160;34161;34162;40168;47951;47952;47953	10839;17683;17684;17685;22442;22443;24648;24649;27156;34235;40397;48120;48121;48122	10839;17684;22443;24649;27156;34235;40397;48120	1369	100
P30043	BLVRB	Flavin reductase (NADPH) OS=Homo sapiens GN=BLVRB PE=1 SV=3	Flavin reductase (NADPH)	8	8	8	1	8	8	8	1	8	1	8	1	8	54.4	54.4	54.4	22.119	206	206	0	118.17	By matching	By MS/MS	4.9	54.4	305050000	310410	304740000	280670	298840000	0	22	22				886	9013;13117;13150;14865;15741;19735;21730;22885	True;True;True;True;True;True;True;True	9710;14102;14137;16254;16255;17207;21507;23681;24913;24914	24100;35407;35488;35489;35490;35491;35492;35493;35494;35495;40835;40836;40837;43294;43295;43296;43297;54329;54330;54331;54332;60105;63254;63255;63256;63257;63258	23726;35475;35476;35550;35551;35552;35553;41026;41027;41028;43666;43667;43668;54684;54685;60291;63516;63517;63518;63519;63520;63521	23726;35475;35553;41027;43666;54685;60291;63518	1014;1015;1016	87;150;185
P13497	BMP1	Bone morphogenetic protein 1 OS=Homo sapiens GN=BMP1 PE=1 SV=2	Bone morphogenetic protein 1	2	2	2	1	2	2	2	0	2	0	2	0	2	2.9	2.9	2.9	111.25	986	986	0.00041684	16.631		By MS/MS	0	2.9	3790000	0	3790000	0	3790000	0	3	3				615	858;22225	True;True	929;24209	2367;2368;61402	2352;2353;61554	2353;61554
Q9H3K6	BOLA2	BolA-like protein 2 OS=Homo sapiens GN=BOLA2 PE=1 SV=1	BolA-like protein 2	2	2	2	1	2	2	2	1	2	1	2	1	2	26.7	26.7	26.7	10.116	86	86	0	28.253	By matching	By MS/MS	8.1	26.7	8283600	33568	8250000	0	8250000	0	5	5				2427	3622;21116	True;True	3900;23001	9740;9741;9742;9743;58271;58272;58273;58274	9491;9492;9493;9494;58470	9493;58470
P46736	BRCC3	Lys-63-specific deubiquitinase BRCC36 OS=Homo sapiens GN=BRCC3 PE=1 SV=2	Lys-63-specific deubiquitinase BRCC36	3	3	3	1	3	3	3	0	3	0	3	0	3	12.3	12.3	12.3	36.072	316	316	0	27.248		By MS/MS	0	12.3	6567200	0	6567200	0	6567200	0	5	5				1059	10142;20097;20324	True;True;True	10901;21899;22143	27086;27087;55332;55333;55952	27019;27020;27021;55769;56331	27021;55769;56331
Q9NXR7	BRE	BRCA1-A complex subunit BRE OS=Homo sapiens GN=BRE PE=1 SV=2	BRCA1-A complex subunit BRE	4	4	4	1	4	4	4	0	4	0	4	0	4	12.5	12.5	12.5	43.551	383	383	0	22.649		By MS/MS	0	12.5	5685800	0	5685800	0	5685800	0	5	5				2566	14595;15361;17392;18958	True;True;True;True	15918;16796;18981;20671	39976;42304;42305;47742;52099	40202;42665;47899;52380;52381	40202;42665;47899;52380
Q5VW32	BROX	BRO1 domain-containing protein BROX OS=Homo sapiens GN=BROX PE=1 SV=1	BRO1 domain-containing protein BROX	3	3	3	1	3	3	3	0	3	0	3	0	3	13.1	13.1	13.1	46.476	411	411	0	24.753		By MS/MS	0	13.1	11400000	0	11400000	0	11400000	0	3	3				1851	426;2073;8987	True;True;True	467;2239;9684	1231;5632;24029	1255;5552;23627	1255;5552;23627
P35613	BSG	Basigin OS=Homo sapiens GN=BSG PE=1 SV=2	Basigin	7	7	7	1	7	7	7	2	7	2	7	2	7	28.8	28.8	28.8	42.2	385	385	0	136.01	By matching	By MS/MS	8.8	28.8	545930000	230170	545700000	188380	448160000	0	28	28				959	7972;11292;16832;17254;17292;18154;20233	True;True;True;True;True;True;True	8592;12146;18387;18833;18834;18874;19809;19810;22045;22046	21226;21227;21228;21229;30273;30274;30275;46272;47410;47411;47412;47413;47414;47415;47416;47417;47418;47419;47504;47505;49730;49731;49732;49733;49734;49735;49736;49737;49738;49739;49740;49741;55714;55715;55716;55717;55718	20926;20927;30163;30164;30165;46449;47592;47593;47594;47595;47596;47597;47598;47599;47681;47682;49864;49865;49866;49867;49868;49869;49870;49871;56116;56117;56118;56119;56120	20926;30165;46449;47599;47681;49865;56116	1122;1123;1124	210;239;292
Q10588	BST1	ADP-ribosyl cyclase/cyclic ADP-ribose hydrolase 2 OS=Homo sapiens GN=BST1 PE=1 SV=2	ADP-ribosyl cyclase/cyclic ADP-ribose hydrolase 2	7	7	7	1	7	7	7	0	7	0	7	0	7	31.8	31.8	31.8	35.724	318	318	0	113.95		By MS/MS	0	31.8	208440000	0	208440000	0	207490000	0	17	17				1520	1956;3860;6978;9721;12802;17729;19923	True;True;True;True;True;True;True	2117;4163;4164;7529;10461;13756;19353;21708	5364;10378;10379;18505;18506;25838;25839;34462;34463;34464;34465;34466;48626;48627;54826;54827	5298;10159;10160;18165;25670;25671;25672;25673;25674;34521;34522;34523;34524;48822;48823;55240;55241	5298;10160;18165;25673;34523;48823;55240	1725	253
P20290	BTF3	Transcription factor BTF3 OS=Homo sapiens GN=BTF3 PE=1 SV=1	Transcription factor BTF3	2	2	2	1	2	2	2	0	2	0	2	0	2	22.8	22.8	22.8	22.168	206	206	0	23.743		By MS/MS	0	22.8	36610000	0	36610000	0	36610000	0	5	5				761	12305;21348	True;True	13225;23269	33153;33154;58993;58994;58995	33325;59132;59133;59134;59135	33325;59134
O43684	BUB3	Mitotic checkpoint protein BUB3 OS=Homo sapiens GN=BUB3 PE=1 SV=1	Mitotic checkpoint protein BUB3	7	7	7	1	7	7	7	0	7	0	7	0	7	32.9	32.9	32.9	37.154	328	328	0	46.391		By MS/MS	0	32.9	31680000	0	31680000	0	31680000	0	10	10				210	13017;13937;14318;19407;20052;21967;22735	True;True;True;True;True;True;True	13996;14977;15505;21161;21851;23936;24757	35151;37772;38951;38952;53443;55223;60767;60768;62861	35221;37873;39040;39041;53783;55657;55658;55659;60951;63139	35221;37873;39041;53783;55659;60951;63139
Q7L1Q6	BZW1	Basic leucine zipper and W2 domain-containing protein 1 OS=Homo sapiens GN=BZW1 PE=1 SV=1	Basic leucine zipper and W2 domain-containing protein 1	10	10	9	1	10	10	9	1	10	1	10	1	9	34.4	34.4	32.7	48.043	419	419	0	101.23	By matching	By MS/MS	2.6	34.4	65529000	9928.5	65519000	0	65519000	0	18	18				1933	702;3485;5720;6624;10491;10925;12897;14752;16772;18792	True;True;True;True;True;True;True;True;True;True	761;3757;6166;7144;11289;11757;13855;16131;18323;20493	1929;1930;9397;15160;17487;17488;17489;17490;17491;28067;28068;29262;29263;34766;34767;40523;46137;51666	1936;9170;14868;17120;17121;17122;17123;17124;17125;17126;17127;27988;27989;29201;34861;40728;46311;51902	1936;9170;14868;17121;27988;29201;34861;40728;46311;51902
Q9Y6E2	BZW2	Basic leucine zipper and W2 domain-containing protein 2 OS=Homo sapiens GN=BZW2 PE=1 SV=1	Basic leucine zipper and W2 domain-containing protein 2	5	4	4	1	5	4	4	1	5	1	4	1	4	9.1	7.4	7.4	48.162	419	419	0	31.028	By matching	By MS/MS	2.6	9.1	12755000	17155	12738000	0	12738000	0	4	4				2829	510;5043;10925;11091;12639	True;True;False;True;True	563;5442;11757;11939;13582	1451;1452;13410;29262;29263;29791;29792;29793;34043;34044	1466;13197;29201;29741;34129	1466;13197;29201;29741;34129
Q96B45	C10orf32	UPF0693 protein C10orf32 OS=Homo sapiens GN=C10orf32 PE=1 SV=1	UPF0693 protein C10orf32	2	2	2	1	2	2	2	0	2	0	2	0	2	21.9	21.9	21.9	11.564	105	105	0.00072595	11.836		By MS/MS	0	21.9	902560	0	902560	0	902560	0	2	2				2179	2124;21689	True;True	2296;23633	5786;59983	5703;60175	5703;60175
Q9H0W9	C11orf54	Ester hydrolase C11orf54 OS=Homo sapiens GN=C11orf54 PE=1 SV=1	Ester hydrolase C11orf54	3	3	3	1	3	3	3	0	3	0	3	0	3	20.3	20.3	20.3	35.117	315	315	0	26.062		By MS/MS	0	20.3	15207000	0	15207000	0	15207000	0	7	7				2409	3899;9439;17516	True;True;True	4214;10166;19121	10503;10504;25097;25098;25099;25100;48069	10275;24936;24937;24938;48252;48253;48254	10275;24937;48254
Q53FT3	C11orf73	Protein Hikeshi OS=Homo sapiens GN=C11orf73 PE=1 SV=2	Protein Hikeshi	2	2	2	1	2	2	2	0	2	0	2	0	2	14.7	14.7	14.7	21.627	197	197	0.00072569	11.814		By MS/MS	0	14.7	5176500	0	5176500	0	5176500	0	2	2				1809	13840;17408	True;True	14873;19002	37485;47807	37572;47968	37572;47968
Q99622	C12orf57	Protein C10 OS=Homo sapiens GN=C12orf57 PE=1 SV=1	Protein C10	3	3	3	1	3	3	3	0	3	0	3	0	3	34.9	34.9	34.9	13.178	126	126	0	27.055		By MS/MS	0	34.9	7006600	0	7006600	0	7006600	0	3	3				2293	1898;2480;18543	True;True;True	2057;2677;20221	5201;6747;50785	5102;6578;50900	5102;6578;50900
Q9UKR5	C14orf1	Probable ergosterol biosynthetic protein 28 OS=Homo sapiens GN=C14orf1 PE=1 SV=1	Probable ergosterol biosynthetic protein 28	2	2	2	1	2	2	2	1	2	1	2	1	2	12.1	12.1	12.1	15.864	140	140	0.00075047	12.83	By MS/MS	By MS/MS	6.4	12.1	17227000	178660	17049000	0	17049000	1	3	4				2682	3409;22563	True;True	3679;24568	9209;62251;62252;62253;62254	8986;62377;62378;62379	8986;62378
Q7Z3D6	C14orf159	UPF0317 protein C14orf159, mitochondrial OS=Homo sapiens GN=C14orf159 PE=1 SV=2	UPF0317 protein C14orf159, mitochondrial	2	2	2	1	2	2	2	0	2	0	2	0	2	5.4	5.4	5.4	66.436	616	616	0.003876	10.585		By MS/MS	0	5.4	2023500	0	2023500	0	2023500	0	3	3				1951	314;6612	True;True	340;7129	915;17447	954;17078;17079	954;17078
Q9Y224	C14orf166	UPF0568 protein C14orf166 OS=Homo sapiens GN=C14orf166 PE=1 SV=1	UPF0568 protein C14orf166	8	8	8	1	8	8	8	1	8	1	8	1	8	43.4	43.4	43.4	28.068	244	244	0	72.591	By MS/MS	By MS/MS	6.6	43.4	118950000	57433	118890000	0	118890000	1	11	12				2727	978;4451;5248;9008;9137;10356;13525;14756	True;True;True;True;True;True;True;True	1059;4807;5665;9705;9841;11146;14537;16135	2692;11896;13926;13927;24076;24077;24335;24336;27693;27694;27695;27696;27697;36512;36513;40529;40530	2645;11675;13682;23677;24014;24015;27635;27636;27637;36541;40733;40734	2645;11675;13682;23677;24015;27636;36541;40733
Q96S19	C16orf13	UPF0585 protein C16orf13 OS=Homo sapiens GN=C16orf13 PE=1 SV=2	UPF0585 protein C16orf13	3	3	3	1	3	3	3	0	3	0	3	0	3	16.2	16.2	16.2	22.578	204	204	0	22.073		By MS/MS	0	16.2	4081900	0	4081900	0	4081900	0	4	4				2269	1393;4271;14443	True;True;True	1509;4618;15684	3846;11476;39381;39382	3714;11285;39497;39498	3714;11285;39497
Q96GQ5	C16orf58	RUS1 family protein C16orf58 OS=Homo sapiens GN=C16orf58 PE=1 SV=2	RUS1 family protein C16orf58	2	2	2	1	2	2	2	0	2	0	2	0	2	7.1	7.1	7.1	51.017	468	468	0.00073992	12.449		By MS/MS	0	7.1	4286200	0	4286200	0	4286200	0	2	2				2219	374;6221	True;True	409;6713	1094;1095;16441	1136;16124	1136;16124
Q7Z3J2	C16orf62	UPF0505 protein C16orf62 OS=Homo sapiens GN=C16orf62 PE=1 SV=2	UPF0505 protein C16orf62	8	8	8	1	8	8	8	0	8	0	8	0	8	11.6	11.6	11.6	109.56	963	963	0	85.079		By MS/MS	0	11.6	18385000	0	18385000	0	18385000	0	12	12				1953	150;5670;6411;17738;18460;19332;19539;20239	True;True;True;True;True;True;True;True	161;6113;6918;19362;20132;21076;21300;22053	407;408;15047;15048;16930;16931;48645;50552;53194;53808;55734	439;440;14763;14764;16601;48835;50657;53504;53505;54108;56132;56133	439;14764;16601;48835;50657;53505;54108;56132
Q9HAS0	C17orf75	Protein Njmu-R1 OS=Homo sapiens GN=C17orf75 PE=1 SV=2	Protein Njmu-R1	2	2	2	1	2	2	2	0	2	0	2	0	2	6.8	6.8	6.8	44.621	396	396	0.00041929	16.865		By MS/MS	0	6.8	20494000	0	20494000	0	20494000	0	2	2				2469	7497;15629	True;True	8088;17085	19970;42992	19666;43373	19666;43373
Q9NWV4	C1orf123	UPF0587 protein C1orf123 OS=Homo sapiens GN=C1orf123 PE=1 SV=1	UPF0587 protein C1orf123	2	2	2	1	2	2	2	0	2	0	2	0	2	15	15	15	18.048	160	160	0	35.354		By MS/MS	0	15	17822000	0	17822000	0	17822000	0	4	4				2554	1765;19151	True;True	1916;20879	4838;4839;4840;52697	4701;4702;4703;53010	4701;53010
Q07021	C1QBP	Complement component 1 Q subcomponent-binding protein, mitochondrial OS=Homo sapiens GN=C1QBP PE=1 SV=1	Complement component 1 Q subcomponent-binding protein, mitochondrial	9	9	9	1	9	9	9	1	9	1	9	1	9	60.6	60.6	60.6	31.362	282	282	0	159.45	By MS/MS	By MS/MS	9.6	60.6	474940000	73794	474860000	0	470280000	1	23	24				1496	790;791;1524;4320;6432;8762;10797;14585;20293	True;True;True;True;True;True;True;True;True	855;856;1650;4671;6940;9444;11619;15905;22112	2174;2175;2176;2177;2178;4232;4233;4234;4235;4236;11599;11600;16978;16979;16980;23357;23358;28908;39950;39951;55888;55889;55890;55891;55892	2151;2152;2153;2154;4082;4083;4084;4085;4086;11410;11411;16642;16643;22917;22918;22919;28844;40178;40179;56282;56283;56284;56285;56286	2151;2154;4083;11411;16642;22918;28844;40179;56285	1704	240
P00736	C1R	Complement C1r subcomponent OS=Homo sapiens GN=C1R PE=1 SV=2	Complement C1r subcomponent;Complement C1r subcomponent heavy chain;Complement C1r subcomponent light chain	7	7	7	1	7	7	7	0	7	0	7	0	7	17.4	17.4	17.4	80.118	705	705	0	51.513		By MS/MS	0	17.4	23502000	0	23502000	0	23502000	0	9	9				409	6574;10562;13744;14122;15994;16202;19195	True;True;True;True;True;True;True	7089;11364;14771;15219;15220;17482;17708;20926	17339;28243;37204;38333;38334;44050;44051;44600;52805	16969;28151;37310;38422;38423;44381;44382;44939;53106	16969;28151;37310;38423;44381;44939;53106	250	630
P09871	C1S	Complement C1s subcomponent OS=Homo sapiens GN=C1S PE=1 SV=1	Complement C1s subcomponent;Complement C1s subcomponent heavy chain;Complement C1s subcomponent light chain	5	5	5	1	5	5	5	0	5	0	5	0	5	9	9	9	76.684	688	688	0	32.346		By MS/MS	0	9	22005000	0	22005000	0	22005000	0	6	6				551	4949;7630;10029;14442;19359	True;True;True;True;True	5340;8228;10783;15683;21111	13166;20353;26752;39380;53304;53305	12944;20109;20110;26698;39496;53631;53632	12944;20110;26698;39496;53632
P30042	C21orf33	ES1 protein homolog, mitochondrial OS=Homo sapiens GN=C21orf33 PE=1 SV=3	ES1 protein homolog, mitochondrial	3	3	3	1	3	3	3	0	3	0	3	0	3	22.8	22.8	22.8	28.17	268	268	0	22.812		By MS/MS	0	22.8	42444000	0	42444000	0	42444000	0	7	7				885	6449;8770;10716	True;True;True	6960;9452;11533	17025;17026;23382;23383;28689;28690	16684;22939;22940;22941;28636;28637;28638	16684;22941;28638
Q86YS7	C2CD5	C2 domain-containing protein 5 OS=Homo sapiens GN=C2CD5 PE=1 SV=1	C2 domain-containing protein 5	7	7	7	1	7	7	7	0	7	0	7	0	7	15.3	15.3	15.3	110.45	1000	1000	0	56.777		By MS/MS	0	15.3	22909000	0	22909000	0	22909000	0	10	10				1987	1728;1906;5420;6087;6699;13478;21284	True;True;True;True;True;True;True	1878;2066;5850;6568;7224;14487;23198	4762;5244;5245;14383;14384;16105;17730;17731;36401;36402;58806;58807	4617;4618;5174;14102;15777;15778;17380;36438;58943;58944	4617;5174;14102;15778;17380;36438;58944
Q9H799	C5orf42	Uncharacterized protein C5orf42 OS=Homo sapiens GN=C5orf42 PE=1 SV=4	Uncharacterized protein C5orf42	2	2	2	1	2	2	2	2	0	2	0	2	0	0.8	0.8	0.8	361.74	3197	3197	0.0007228	11.681	By MS/MS		0.8	0	1261200	1261200	0	1005500	0	3	0	3				2451	3305;5539	True;True	3564;5976	8911;14721;14722;14723;14724	8713;14456;14457	8713;14457	2169	1282
Q7Z4R8	C6orf120	UPF0669 protein C6orf120 OS=Homo sapiens GN=C6orf120 PE=1 SV=1	UPF0669 protein C6orf120	2	2	2	1	2	2	2	0	2	0	2	0	2	34	34	34	20.772	191	191	0.00041982	16.956		By MS/MS	0	34	18117000	0	18117000	0	18117000	0	4	4				1961	7545;21978	True;True	8139;23947	20076;60790;60791	19753;60968;60969;60970	19753;60969
Q9H8G2	CAAP1	Caspase activity and apoptosis inhibitor 1 OS=Homo sapiens GN=CAAP1 PE=1 SV=2	Caspase activity and apoptosis inhibitor 1	2	2	2	1	2	2	2	0	2	0	2	0	2	5.8	5.8	5.8	38.367	361	361	0.0007657	13.301		By MS/MS	0	5.8	19137000	0	19137000	0	19137000	0	1	1				2458	5800;14827	True;True	6254;16216	15376;15377;40761;40762	15079;40956	15079;40956
P54289	CACNA2D1	Voltage-dependent calcium channel subunit alpha-2/delta-1 OS=Homo sapiens GN=CACNA2D1 PE=1 SV=3	Voltage-dependent calcium channel subunit alpha-2/delta-1;Voltage-dependent calcium channel subunit alpha-2-1;Voltage-dependent calcium channel subunit delta-1	28;2	28;2	28;2	2	28	28	28	2	28	2	28	2	28	35.3	35.3	35.3	124.57	1103	1103;1150	0	318.94	By matching	By MS/MS	2.8	35.3	278010000	21049	277990000	25155	275390000	0	53	53				1208	1198;2262;3980;4534;4688;4881;6718;7321;8967;9610;10053;10120;10402;10403;12709;15474;15485;16560;17459;18049;18542;18661;19446;19584;20472;20968;22719;22779	True;True;True;True;True;True;True;True;True;True;True;True;True;True;True;True;True;True;True;True;True;True;True;True;True;True;True;True	1303;2449;4304;4895;5057;5268;7244;7898;9660;10347;10808;10878;11194;11195;13656;13657;16917;16928;18092;19055;19056;19701;20220;20351;21203;21348;22304;22846;24740;24802	3284;3285;6175;6176;10721;12102;12502;12503;13014;13015;17774;17775;19469;19470;19471;19472;23943;23944;25564;26831;27030;27806;27807;34219;34220;34221;34222;34223;34224;42605;42606;42622;42623;45546;45547;47914;47915;47916;49483;50783;50784;51259;51260;53553;53554;53948;56381;57892;57893;57894;57895;62767;62768;62984;62985;62986;62987	3205;3206;6069;6070;10496;11894;12289;12802;17429;17430;17431;19151;19152;23511;25386;26763;26952;27743;27744;34283;34284;34285;34286;34287;34288;34289;42960;42961;42974;45757;48078;48079;48080;49632;49633;50898;50899;51441;51442;53882;54286;56730;58120;58121;58122;58123;58124;58125;63016;63017;63258;63259;63260	3206;6069;10496;11894;12289;12802;17430;19152;23511;25386;26763;26952;27743;27744;34287;42960;42974;45757;48079;49633;50899;51441;53882;54286;56730;58124;63016;63259	1389;1390	793;1046
Q9HB71	CACYBP	Calcyclin-binding protein OS=Homo sapiens GN=CACYBP PE=1 SV=2	Calcyclin-binding protein	7	7	7	1	7	7	7	1	7	1	7	1	7	45.6	45.6	45.6	26.21	228	228	0	47.117	By matching	By MS/MS	3.9	45.6	24654000	13665	24641000	0	24641000	0	6	6				2472	622;5498;10664;10953;10977;17319;22013	True;True;True;True;True;True;True	680;5932;11478;11786;11811;18903;23982	1760;14630;28533;28534;29374;29445;47564;47565;60877;60878;60879	1761;14381;28485;29338;29407;47734;61043	1761;14381;28485;29338;29407;47734;61043
P27708	CAD	CAD protein OS=Homo sapiens GN=CAD PE=1 SV=3	CAD protein;Glutamine-dependent carbamoyl-phosphate synthase;Aspartate carbamoyltransferase;Dihydroorotase	25	25	25	1	25	25	25	0	25	0	25	0	25	17.3	17.3	17.3	242.98	2225	2225	0	250.64		By MS/MS	0	17.3	248210000	0	248210000	0	244460000	0	43	43				857	111;188;1369;1907;2127;5038;5741;7762;9994;10135;11374;11444;12092;12179;12315;12608;14021;15542;16122;18436;19240;20447;20735;20938;20939	True;True;True;True;True;True;True;True;True;True;True;True;True;True;True;True;True;True;True;True;True;True;True;True;True	120;204;1485;2067;2299;5435;6188;8369;10747;10894;12235;12310;12999;13094;13235;13547;15065;15066;16990;17622;20106;20973;22278;22592;22593;22815;22816	305;519;520;3779;5246;5789;5790;13397;13398;13399;15205;15206;20713;26641;26642;26643;27063;30463;30629;30630;32558;32559;32847;32848;33182;33183;33941;37993;37994;37995;37996;42760;42761;44391;50497;50498;52913;52914;56317;57167;57168;57169;57170;57171;57172;57808;57809;57810	340;537;538;3648;5175;5706;13187;13188;14905;20464;26599;26600;26601;26991;30353;30500;32721;32722;33060;33352;33353;34045;38079;38080;38081;43106;43107;44735;50608;50609;53200;53201;56673;57485;57486;57487;57488;57489;57490;57491;58052;58053;58054	340;537;3648;5175;5706;13187;14905;20464;26599;26991;30353;30500;32721;33060;33352;34045;38080;43106;44735;50609;53200;56673;57488;58052;58053	987;988	522;1243
Q05682	CALD1	Caldesmon OS=Homo sapiens GN=CALD1 PE=1 SV=3	Caldesmon	12	12	12	1	12	12	12	1	12	1	12	1	12	22.1	22.1	22.1	93.23	793	793	0	174.33	By matching	By MS/MS	2.1	22.1	70608000	43002	70565000	0	70565000	0	17	17				1487	4657;5108;8378;11977;15851;15873;16299;16504;16821;19715;20886;22307	True;True;True;True;True;True;True;True;True;True;True;True	5024;5513;9029;12875;17326;17351;17808;18032;18376;21487;22759;24299	12406;13555;13556;22319;22320;32164;32165;43598;43599;43679;43680;43681;44864;45414;46255;46256;54288;54289;54290;57664;57665;61616	12197;13341;21934;32160;32161;43933;44058;45172;45644;46432;46433;54626;54627;54628;57929;57930;61768;61769	12197;13341;21934;32160;43933;44058;45172;45644;46432;54626;57929;61769
Q9HA72	CALHM2	Calcium homeostasis modulator protein 2 OS=Homo sapiens GN=CALHM2 PE=2 SV=1	Calcium homeostasis modulator protein 2	2	2	2	1	2	2	2	0	2	0	2	0	2	5.6	5.6	5.6	36.174	323	323	0.00042626	17.636		By MS/MS	0	5.6	4122500	0	4122500	0	4122500	0	3	3				2468	172;1612	True;True	186;1757	479;480;4458	503;504;4310	503;4310
P62158	CALM1	Calmodulin OS=Homo sapiens GN=CALM1 PE=1 SV=2	Calmodulin	11	11	11	1	11	11	11	6	11	6	11	6	11	80.5	80.5	80.5	16.837	149	149	0	211.57	By MS/MS	By MS/MS	53	80.5	2333100000	15078000	2318000000	10036000	2211900000	22	71	93				1313	487;3247;3317;4280;4281;4642;4678;14365;14366;17746;20402	True;True;True;True;True;True;True;True;True;True;True	538;3503;3578;4628;4629;5007;5008;5009;5047;15570;15571;19370;19371;19372;22228	1392;1393;1394;1395;1396;1397;1398;8749;8942;8943;8944;11502;11503;11504;11505;11506;11507;11508;11509;11510;11511;11512;12350;12351;12352;12353;12354;12355;12356;12357;12358;12359;12360;12361;12362;12363;12364;12365;12366;12367;12368;12369;12370;12371;12372;12373;12374;12375;12376;12377;12469;12470;12471;12472;12473;12474;39080;39081;39082;39083;39084;39085;48664;48665;48666;48667;48668;48669;48…	1408;1409;1410;1411;1412;1413;1414;1415;1416;1417;1418;8563;8739;8740;8741;11315;11316;11317;11318;11319;11320;11321;11322;11323;11324;11325;11326;12134;12135;12136;12137;12138;12139;12140;12141;12142;12143;12144;12145;12146;12147;12148;12149;12150;12151;12152;12153;12154;12155;12156;12157;12158;12159;12160;12161;12162;12163;12164;12165;12166;12167;12168;12169;12170;12171;12254;12255;12256;12257;…	1416;8563;8741;11319;11326;12168;12259;39170;39173;48853;56562	1508;1509;1510;1511	72;73;145;146
Q9NZT1	CALML5	Calmodulin-like protein 5 OS=Homo sapiens GN=CALML5 PE=1 SV=2	Calmodulin-like protein 5	4	4	4	1	4	4	4	3	2	3	2	3	2	45.9	45.9	45.9	15.892	146	146	0	28.306	By MS/MS	By MS/MS	40.4	21.2	1712900000	729290	1712200000	729290	0	5	1	6				2588	780;846;12463;15257	True;True;True;True	845;916;13396;16670	2153;2337;33530;33531;33532;33533;33534;41811	2138;2322;33658;33659;33660;41999	2138;2322;33658;41999
P27797	CALR	Calreticulin OS=Homo sapiens GN=CALR PE=1 SV=1	Calreticulin	17	17	17	1	17	17	17	8	17	8	17	8	17	69.3	69.3	69.3	48.141	417	417	0	224.47	By MS/MS	By MS/MS	26.9	69.3	1631200000	2520900	1628700000	8163300	1556400000	9	75	84				858	2638;5979;7335;7348;8502;8733;9046;9562;9617;9618;10106;11293;11400;12072;12504;16229;17488	True;True;True;True;True;True;True;True;True;True;True;True;True;True;True;True;True	2844;6453;7913;7926;9166;9411;9746;10296;10355;10356;10863;12147;12148;12263;12976;12977;12978;13439;17738;19091	7131;7132;15824;15825;15826;15827;19516;19517;19518;19519;19520;19549;19550;19551;19552;22656;22657;22658;22659;22660;22661;23257;24177;24178;24179;24180;24181;24182;24183;25421;25422;25423;25424;25425;25581;25582;25583;25584;25585;25586;25587;25588;25589;25590;25591;27005;27006;30276;30277;30278;30279;30280;30281;30282;30283;30284;30285;30532;32508;32509;32510;32511;32512;33662;33663;33664;44655…	6975;6976;15510;15511;15512;15513;19216;19217;19218;19219;19220;19242;19243;19244;22258;22259;22260;22261;22262;22263;22264;22265;22266;22267;22268;22811;22812;22813;23820;23821;23822;23823;23824;23825;23826;25259;25260;25261;25262;25263;25401;25402;25403;25404;25405;25406;25407;25408;25409;25410;25411;25412;25413;25414;25415;26928;26929;30166;30167;30168;30169;30170;30171;30172;30173;30174;30175…	6976;15513;19218;19243;22261;22811;23822;25261;25404;25406;26928;30179;30421;32679;33802;44985;48182	989;990;991	122;131;257
O43852	CALU	Calumenin OS=Homo sapiens GN=CALU PE=1 SV=2	Calumenin	23	23	23	1	23	23	23	11	23	11	23	11	23	72.4	72.4	72.4	37.106	315	315	0	323.31	By MS/MS	By MS/MS	47	72.4	1205400000	2403000	1203000000	10104000	1181400000	11	64	75				223	3274;3535;4522;4998;4999;5023;5080;5981;7983;9213;9214;9583;9584;13593;14013;14090;14744;18917;18918;20630;20642;22059;22265	True;True;True;True;True;True;True;True;True;True;True;True;True;True;True;True;True;True;True;True;True;True;True	3533;3809;3810;4883;5390;5391;5392;5419;5484;6455;8604;9923;9924;10317;10318;14609;15056;15167;15168;16121;20629;20630;22472;22485;24032;24255	8843;9529;9530;9531;9532;9533;9534;9535;9536;9537;12075;12076;12077;12078;13286;13287;13288;13289;13290;13291;13357;13358;13359;13360;13485;15831;15832;15833;15834;21253;21254;21255;21256;21257;21258;24535;24536;24537;24538;24539;25489;25490;25491;25492;25493;25494;36692;36693;37974;37975;37976;37977;37978;37979;37980;38218;38219;38220;38221;38222;38223;40488;40489;51979;51980;51981;51982;51983;5…	8656;9306;9307;9308;9309;9310;9311;9312;9313;9314;11869;11870;11871;11872;11873;11874;13065;13066;13067;13068;13069;13070;13141;13142;13143;13144;13145;13146;13147;13148;13273;15515;20949;20950;20951;20952;24294;24295;25326;25327;25328;25329;36703;36704;38062;38063;38064;38065;38066;38307;38308;38309;38310;38311;38312;38313;40692;52238;52239;52240;52241;52242;52243;52244;57167;57188;57189;57190;5…	8656;9312;11874;13069;13070;13143;13273;15515;20952;24294;24295;25326;25329;36704;38062;38309;40692;52238;52242;57167;57190;61206;61667	132;133;134;135	188;197;217;249
Q14012	CAMK1	Calcium/calmodulin-dependent protein kinase type 1 OS=Homo sapiens GN=CAMK1 PE=1 SV=1;Calcium/calmodulin-dependent protein kinase type 1D OS=Homo sapiens GN=CAMK1D PE=1 SV=1	Calcium/calmodulin-dependent protein kinase type 1;Calcium/calmodulin-dependent protein kinase type 1D	2;1	2;1	2;1	2	2	2	2	0	2	0	2	0	2	7.3	7.3	7.3	41.337	370	370;385	0	47.829		By MS/MS	0	7.3	476110	0	476110	0	476110	0	2	2				1624	711;14399	True;True	770;15621	1952;39235	1958;39337	1958;39337
Q13557	CAMK2D	Calcium/calmodulin-dependent protein kinase type II subunit delta OS=Homo sapiens GN=CAMK2D PE=1 SV=3	Calcium/calmodulin-dependent protein kinase type II subunit delta	10;2;2	10;2;2	9;1;1	3	10	10	9	2	10	2	10	2	9	28.1	28.1	24.2	56.369	499	499;478;666	0	209.87	By MS/MS	By MS/MS	4.8	28.1	532110000	105550	532000000	101710	523930000	2	31	33				1596	827;2032;6156;7209;7342;7442;9521;13637;14441;21613	True;True;True;True;True;True;True;True;True;True	896;2195;6644;7777;7920;8029;10254;14656;14657;15682;23551	2298;2299;2300;2301;5522;16243;16244;16245;16246;16247;16248;19145;19146;19538;19539;19818;25328;25329;25330;25331;36866;36867;36868;36869;36870;36871;39376;39377;39378;39379;59697;59698;59699;59700;59701;59702	2286;2287;2288;5432;15912;15913;15914;15915;15916;15917;15918;18808;18809;18810;19231;19232;19540;25169;25170;25171;25172;36904;36905;36906;36907;39494;39495;59816;59817;59818;59819;59820;59821	2288;5432;15915;18808;19232;19540;25171;36907;39495;59821	1763;1764	438;443
Q13555	CAMK2G	Calcium/calmodulin-dependent protein kinase type II subunit gamma OS=Homo sapiens GN=CAMK2G PE=1 SV=3	Calcium/calmodulin-dependent protein kinase type II subunit gamma	5	4	4	1	5	4	4	0	5	0	4	0	4	10.8	7.3	7.3	62.608	558	558	0	24.59		By MS/MS	0	10.8	16074000	0	16074000	0	16074000	0	4	4				1595	827;2179;7343;8616;10707	False;True;True;True;True	896;2353;7921;9290;11524	2298;2299;2300;2301;5924;19540;19541;22959;28674	2286;2287;2288;5821;19233;22537;22538;28622	2288;5821;19233;22537;28622
Q86VP6	CAND1	Cullin-associated NEDD8-dissociated protein 1 OS=Homo sapiens GN=CAND1 PE=1 SV=2	Cullin-associated NEDD8-dissociated protein 1	30	30	28	1	30	30	28	7	30	7	30	6	28	36	36	34.6	136.37	1230	1230	0	321.29	By MS/MS	By MS/MS	6.8	36	731820000	301890	731520000	344650	729760000	1	63	64				1976	81;505;1502;1899;2203;2649;3664;3710;4241;5265;6335;6965;7223;8937;9039;9339;9608;10779;12282;13602;14440;15005;15985;16057;16904;17998;18451;19208;19790;20763	True;True;True;True;True;True;True;True;True;True;True;True;True;True;True;True;True;True;True;True;True;True;True;True;True;True;True;True;True;True	90;558;1625;2058;2381;2855;3943;3991;4586;4587;5686;6834;7509;7510;7791;9628;9737;10061;10345;11600;13201;14619;15681;16401;17472;17552;18462;19647;20123;20940;21566;22626	232;233;234;1441;4142;4143;4144;5202;5203;5204;5205;5977;5978;5979;7150;9842;9843;9944;9945;9946;11388;11389;13989;13990;13991;13992;13993;16760;16761;18454;18455;18456;18457;19207;19208;23864;23865;24162;24163;24836;24837;24838;25561;28868;28869;28870;28871;28872;33093;33094;36713;36714;36715;39372;39373;39374;39375;41166;41167;44035;44231;44232;44233;46451;49350;49351;49352;49353;49354;50534;50…	276;277;1455;3998;3999;5103;5104;5105;5106;5866;5867;6994;9574;9575;9665;9666;9667;9668;11187;11188;13736;13737;16457;18115;18116;18117;18915;18916;18917;23423;23795;23796;24592;25383;28810;28811;28812;33267;36721;36722;39491;39492;39493;41349;44366;44565;44566;44567;44568;46605;49509;49510;49511;49512;49513;50643;50644;50645;53140;54822;54823;54824;57576;57577;57578	276;1455;3999;5105;5867;6994;9574;9665;11187;13736;16457;18117;18916;23423;23795;24592;25383;28810;33267;36721;39491;41349;44366;44565;46605;49512;50644;53140;54822;57576	1985;1986	25;1227
P27824	CANX	Calnexin OS=Homo sapiens GN=CANX PE=1 SV=2	Calnexin	27	27	27	1	27	27	27	12	27	12	27	12	27	49.3	49.3	49.3	67.567	592	592	0	323.31	By MS/MS	By MS/MS	24.2	49.3	1183100000	4973600	1178100000	7973400	1127700000	12	59	71				860	554;1721;2592;2593;3036;3548;5361;8290;8692;10418;10443;10822;10823;11204;11294;12990;15884;16300;17062;17063;18998;19055;19414;19473;22027;22255;22256	True;True;True;True;True;True;True;True;True;True;True;True;True;True;True;True;True;True;True;True;True;True;True;True;True;True;True	609;1871;2796;2797;3272;3823;5787;8928;8929;9369;11210;11238;11645;11646;12055;12149;13967;17363;17809;18628;18629;20713;20774;20775;21168;21231;23996;23997;24245;24246	1581;1582;4743;4744;4745;4746;4747;7048;7049;7050;7051;7052;7053;8232;8233;9567;9568;14216;14217;14218;14219;22086;22087;22088;22089;22090;23150;23151;23152;23153;23154;23155;27850;27851;27852;27853;27854;27855;27856;27919;28964;28965;28966;28967;28968;28969;28970;28971;30062;30063;30064;30286;35076;43721;43722;43723;43724;43725;43726;44865;44866;44867;46935;46936;46937;46938;46939;46940;46941;52…	1595;4600;4601;4602;4603;4604;6898;6899;6900;6901;6902;6903;8103;8104;9339;9340;13957;13958;21730;21731;22719;22720;22721;22722;22723;27785;27786;27787;27788;27789;27790;27843;28892;28893;28894;28895;28896;28897;28898;29983;29984;29985;29986;30180;35146;44089;44090;44091;44092;45173;45174;45175;47149;47150;47151;47152;47153;47154;47155;52476;52709;52710;52711;53790;53791;53792;53793;53965;61065;6…	1595;4602;6902;6903;8103;9340;13957;21730;22721;27790;27843;28896;28898;29984;30180;35146;44090;45174;47151;47152;52476;52709;53791;53965;61066;61645;61646	992;993;994	109;123;266
Q01518	CAP1	Adenylyl cyclase-associated protein 1 OS=Homo sapiens GN=CAP1 PE=1 SV=5	Adenylyl cyclase-associated protein 1	18	18	18	1	18	18	18	1	18	1	18	1	18	46.1	46.1	46.1	51.901	475	475	0	265.15	By MS/MS	By MS/MS	3.8	46.1	590050000	244180	589810000	0	574360000	1	48	49				1446	468;804;1411;2770;5802;5915;8975;10401;11108;11831;12238;13355;13874;15505;18159;18744;20344;22115	True;True;True;True;True;True;True;True;True;True;True;True;True;True;True;True;True;True	513;514;872;1527;2988;6256;6257;6258;6386;9670;11193;11957;12723;13155;14362;14911;16950;19815;19816;20439;22166;24093	1346;1347;2221;2222;2223;2224;3894;3895;7529;7530;7531;7532;15379;15380;15381;15382;15383;15659;15660;23976;27805;29829;29830;29831;31819;32976;36079;36080;36081;36082;36083;37610;37611;37612;42655;42656;42657;42658;49746;49747;49748;49749;49750;49751;51492;51493;56024;56025;56026;56027;56028;56029;56030;61144	1361;1362;2215;2216;2217;2218;2219;2220;3758;3759;3760;7391;7392;7393;15081;15082;15083;15084;15085;15329;23560;27742;29774;29775;31838;33175;36147;36148;36149;36150;37696;37697;37698;37699;43003;43004;43005;43006;49877;49878;49879;49880;49881;51663;56381;56382;56383;56384;56385;56386;56387;61321	1361;2220;3758;7391;15084;15329;23560;27742;29775;31838;33175;36148;37696;43004;49878;51663;56385;61321	1669;1670;1671;1672	4;157;162;437
P40123	CAP2	Adenylyl cyclase-associated protein 2 OS=Homo sapiens GN=CAP2 PE=1 SV=1	Adenylyl cyclase-associated protein 2	9	9	9	1	9	9	9	0	9	0	9	0	9	27	27	27	52.823	477	477	0	81.077		By MS/MS	0	27	42029000	0	42029000	0	42029000	0	17	17				999	1640;5141;10132;12476;12894;16962;18158;18835;20387	True;True;True;True;True;True;True;True;True	1785;1786;5547;10890;13409;13410;13851;18522;19814;20537;22212	4519;4520;13642;13643;27047;33568;33569;34756;34757;46611;46612;46613;49745;51783;56150;56151;56152	4366;4367;4368;13428;26973;26974;33698;33699;34850;46769;46770;46771;49875;49876;52040;56515;56516	4367;13428;26974;33699;34850;46771;49875;52040;56516	1170;1171	4;476
P40121	CAPG	Macrophage-capping protein OS=Homo sapiens GN=CAPG PE=1 SV=2	Macrophage-capping protein	8	8	8	1	8	8	8	2	8	2	8	2	8	27.6	27.6	27.6	38.498	348	348	0	77.768	By MS/MS	By MS/MS	5.7	27.6	62508000	81056	62427000	92512	59777000	1	14	15				998	1605;1855;1856;3586;5263;6423;15912;21457	True;True;True;True;True;True;True;True	1750;2011;2012;2013;3861;5684;6931;17393;23385;23386	4445;5092;5093;5094;5095;9663;9664;9665;9666;13987;16956;16957;16958;16959;43813;43814;43815;43816;59258;59259;59260	4297;5011;5012;5013;9420;13734;16624;16625;16626;44167;44168;44169;59370;59371;59372	4297;5012;5013;9420;13734;16625;44168;59372	1168;1169	220;261
P07384	CAPN1	Calpain-1 catalytic subunit OS=Homo sapiens GN=CAPN1 PE=1 SV=1	Calpain-1 catalytic subunit	21	21	21	1	21	21	21	5	21	5	21	5	21	35.2	35.2	35.2	81.889	714	714	0	168.03	By MS/MS	By MS/MS	6.7	35.2	279020000	345530	278680000	325140	274720000	1	36	37				486	2664;3150;3856;7850;8512;10567;11034;11690;13093;13094;13745;14150;16305;17208;17283;17478;17893;19204;22080;22100;22777	True;True;True;True;True;True;True;True;True;True;True;True;True;True;True;True;True;True;True;True;True	2870;3397;4156;8462;9177;11369;11878;12573;14076;14077;14772;15266;15267;17814;17815;18785;18864;19077;19532;20935;24055;24077;24800	7192;8497;8498;8499;8500;10358;10359;10360;20908;20909;22683;22684;22685;22686;28259;28260;28261;28262;28263;29617;29618;31473;31474;31475;31476;35336;35337;35338;35339;37205;38449;38450;38451;38452;44875;44876;47296;47485;47486;47487;47488;47489;47954;47955;47956;47957;49064;52823;52824;61062;61113;61114;62981	7048;8347;8348;10145;10146;20633;22286;22287;28167;28168;28169;28170;28171;29584;31521;31522;31523;31524;35390;35391;35392;35393;37311;38537;38538;45181;45182;47487;47667;47668;48123;49219;53119;53120;61251;61294;61295;63255	7048;8348;10145;20633;22286;28171;29584;31524;35390;35391;37311;38538;45181;47487;47667;48123;49219;53120;61251;61295;63255	388;389;390	329;438;559
P17655	CAPN2	Calpain-2 catalytic subunit OS=Homo sapiens GN=CAPN2 PE=1 SV=6	Calpain-2 catalytic subunit	26	26	26	1	26	26	26	2	26	2	26	2	26	52.4	52.4	52.4	79.994	700	700	0	323.31	By MS/MS	By MS/MS	2.6	52.4	835230000	171170	835060000	212670	761770000	2	82	84				728	515;3266;5619;6523;7981;8584;10342;11012;11013;11860;11914;11915;12015;12230;13091;13092;14284;14514;14903;15720;17094;17154;17490;22093;22597;22598	True;True;True;True;True;True;True;True;True;True;True;True;True;True;True;True;True;True;True;True;True;True;True;True;True;True	568;3524;6058;7036;8602;9254;11130;11131;11853;11854;12754;12809;12810;12915;13147;14074;14075;15463;15464;15465;15794;16296;17186;18662;18728;19093;24070;24604;24605	1458;8825;14921;14922;17204;17205;17206;17207;21247;21248;21249;21250;21251;22860;22861;22862;22863;27662;27663;27664;27665;27666;27667;29560;29561;29562;29563;29564;29565;31896;31897;31898;31899;31900;32027;32028;32029;32030;32031;32032;32033;32254;32255;32256;32257;32964;35333;35334;35335;38870;38871;38872;38873;38874;38875;38876;39608;40930;40931;40932;40933;40934;43238;43239;43240;46999;47000…	1473;8636;8637;14651;16833;16834;16835;16836;20941;20942;20943;20944;20945;20946;20947;22444;22445;22446;22447;27603;27604;27605;27606;29526;29527;29528;29529;29530;29531;29532;29533;31905;31906;31907;31908;31909;32027;32028;32029;32030;32031;32243;32244;32245;32246;32247;32248;32249;33163;35387;35388;35389;38969;38970;38971;38972;38973;38974;38975;39708;41117;41118;41119;41120;41121;41122;43616;…	1473;8636;14651;16834;20946;22447;27605;29527;29533;31909;32028;32030;32244;33163;35387;35389;38971;39708;41120;43617;47210;47350;48185;61271;62454;62457	820;821;822;823	422;426;580;583
O15484	CAPN5	Calpain-5 OS=Homo sapiens GN=CAPN5 PE=1 SV=2	Calpain-5	8	8	8	1	8	8	8	2	8	2	8	2	8	14.5	14.5	14.5	73.168	640	640	0	52.777	By matching	By MS/MS	3.6	14.5	20935000	153310	20782000	299060	20636000	0	9	9				170	250;2393;4222;7741;7980;12199;20471;20912	True;True;True;True;True;True;True;True	274;2587;4566;8347;8601;13115;22303;22786	722;6503;6504;11343;11344;20664;20665;21246;32895;56380;57743	749;6359;11133;20419;20420;20940;33102;56729;58008	749;6359;11133;20419;20940;33102;56729;58008
Q9Y6W3	CAPN7	Calpain-7 OS=Homo sapiens GN=CAPN7 PE=1 SV=1	Calpain-7	2	2	2	1	2	2	2	0	2	0	2	0	2	4.1	4.1	4.1	92.651	813	813	0.0007249	11.759		By MS/MS	0	4.1	3733700	0	3733700	0	3733700	0	2	2				2841	16073;22119	True;True	17569;24097	44266;61150	44603;61328	44603;61328
P04632	CAPNS1	Calpain small subunit 1 OS=Homo sapiens GN=CAPNS1 PE=1 SV=1	Calpain small subunit 1	10;1	10;1	10;1	2	10	10	10	1	10	1	10	1	10	56	56	56	28.315	268	268;248	0	197.68	By MS/MS	By MS/MS	5.6	56	611100000	0	611100000	0	408360000	1	39	40				439	6960;10192;12014;12169;14266;17487;17890;18746;19075;22767	True;True;True;True;True;True;True;True;True;True	7502;10953;12913;12914;13083;15436;15437;19089;19090;19528;19529;20441;20798;24790	18438;18439;27221;27222;32241;32242;32243;32244;32245;32246;32247;32248;32249;32250;32251;32252;32253;32829;32830;38824;38825;38826;38827;38828;47987;47988;47989;49055;49056;49057;49058;49059;51496;51497;51498;52457;52458;52459;52460;52461;52462;62954;62955;62956;62957;62958	18105;27137;32229;32230;32231;32232;32233;32234;32235;32236;32237;32238;32239;32240;32241;32242;33045;38924;38925;38926;38927;38928;48178;48179;48180;48181;49210;49211;49212;49213;49214;49215;51667;51668;52762;52763;52764;52765;52766;63235;63236;63237	18105;27137;32234;33045;38927;48178;49212;51667;52765;63235	282;283;284;285;286	1;113;121;147;212
Q14444	CAPRIN1	Caprin-1 OS=Homo sapiens GN=CAPRIN1 PE=1 SV=2	Caprin-1	5	5	5	1	5	5	5	0	5	0	5	0	5	15	15	15	78.365	709	709	0	36.399		By MS/MS	0	15	27077000	0	27077000	0	27077000	0	6	6				1653	12965;13013;16172;18185;22729	True;True;True;True;True	13942;13992;17675;19843;24750	35009;35145;35146;44533;49805;62846	35082;35215;35216;44873;49934;63128	35082;35216;44873;49934;63128	1839	54
P52907	CAPZA1	F-actin-capping protein subunit alpha-1 OS=Homo sapiens GN=CAPZA1 PE=1 SV=3	F-actin-capping protein subunit alpha-1	12	10	10	1	12	10	10	3	12	2	10	2	10	70.3	60.8	60.8	32.922	286	286	0	200.13	By MS/MS	By MS/MS	19.6	70.3	395990000	265350	395720000	368780	381630000	2	41	43				1187	400;3413;4469;4789;5165;6852;7224;9710;10018;10551;12760;19087	True;True;True;True;True;True;True;True;True;False;False;True	439;3683;4825;5169;5571;5572;7384;7792;10450;10771;10772;11351;13711;20811	1165;9217;9218;9219;11942;11943;11944;11945;12776;12777;12778;13694;13695;13696;13697;18150;18151;18152;19209;19210;19211;25811;25812;25813;25814;25815;26707;26708;26709;26710;26711;28210;28211;28212;28213;34365;34366;34367;34368;52503;52504	1200;8993;8994;8995;11716;11717;11718;11719;11720;11721;12568;12569;12570;12571;12572;12573;12574;12575;13473;13474;13475;17834;17835;17836;17837;18918;18919;25647;25648;25649;25650;25651;25652;26651;26652;26653;26654;26655;26656;26657;26658;28116;28117;28118;28119;28120;28121;28122;34435;34436;52832;52833	1200;8995;11717;12571;13473;17834;18918;25650;26656;28121;34435;52833	1367;1368	59;250
P47755	CAPZA2	F-actin-capping protein subunit alpha-2 OS=Homo sapiens GN=CAPZA2 PE=1 SV=3	F-actin-capping protein subunit alpha-2	15	15	13	1	15	15	13	5	15	5	15	4	13	74.8	74.8	65.4	32.949	286	286	0	323.31	By MS/MS	By MS/MS	24.1	74.8	604000000	774390	603230000	1679600	600130000	2	40	42				1073	449;450;3497;4793;5164;5340;6831;7225;9589;9709;10551;10831;11193;12760;19629	True;True;True;True;True;True;True;True;True;True;True;True;True;True;True	492;493;3769;5174;5570;5766;7363;7793;10323;10449;11351;11654;11655;12043;13711;21395	1284;1285;1286;1287;1288;9422;9423;9424;12791;12792;13690;13691;13692;13693;14159;14160;18100;18101;19212;19213;19214;19215;19216;25510;25511;25805;25806;25807;25808;25809;25810;28210;28211;28212;28213;28984;28985;28986;30036;34365;34366;34367;34368;54042;54043;54044	1302;1303;1304;1305;1306;1307;1308;1309;1310;9200;9201;9202;9203;12589;12590;13470;13471;13472;13901;13902;17771;17772;18920;18921;25340;25341;25645;25646;28116;28117;28118;28119;28120;28121;28122;28909;28910;28911;29960;34435;34436;54375;54376	1303;1309;9201;12589;13470;13901;17772;18921;25340;25646;28121;28909;29960;34435;54376	1254	250
P47756	CAPZB	F-actin-capping protein subunit beta OS=Homo sapiens GN=CAPZB PE=1 SV=4	F-actin-capping protein subunit beta	16	16	16	1	16	16	16	5	16	5	16	5	16	60.6	60.6	60.6	31.35	277	277	0	184.87	By MS/MS	By MS/MS	21.7	60.6	621740000	253430	621480000	284690	592970000	2	55	57				1074	3123;3528;4576;7541;11251;11998;13104;13649;15256;16429;16852;17140;17473;18029;18351;22270	True;True;True;True;True;True;True;True;True;True;True;True;True;True;True;True	3369;3802;4937;8134;12105;12896;14089;14669;16669;17944;17945;18407;18713;18714;19071;19072;19678;19679;20018;24260	8445;8446;8447;9511;9512;9513;12187;12188;20064;20065;20066;20067;20068;30187;30188;30189;30190;32206;32207;32208;32209;35381;35382;36891;36892;41803;41804;41805;41806;41807;41808;41809;41810;45204;45205;45206;45207;46325;46326;47119;47120;47121;47122;47123;47124;47125;47941;47942;47943;47944;47945;47946;49428;49429;49430;50247;50248;50249;61518	8301;8302;8303;9292;11967;11968;11969;19743;19744;19745;19746;30090;30091;30092;32197;32198;35452;35453;36926;36927;41985;41986;41987;41988;41989;41990;41991;41992;41993;41994;41995;41996;41997;41998;45462;45463;45464;45465;46491;47316;47317;47318;47319;47320;48109;48110;48111;48112;48113;49578;49579;49580;49581;49582;49583;50357;50358;61674	8302;9292;11967;19743;30092;32198;35453;36927;41994;45463;46491;47319;48112;49580;50357;61674	1255;1256;1257;1258	13;88;187;197
Q9Y2V2	CARHSP1	Calcium-regulated heat stable protein 1 OS=Homo sapiens GN=CARHSP1 PE=1 SV=2	Calcium-regulated heat stable protein 1	5	5	5	1	5	5	5	1	5	1	5	1	5	66.7	66.7	66.7	15.892	147	147	0	35.879	By matching	By MS/MS	7.5	66.7	109920000	28499	109890000	0	109890000	0	6	6				2753	7990;8382;9052;13149;18162	True;True;True;True;True	8612;9033;9752;14136;19819	21281;22331;22332;22333;22334;24193;35485;35486;35487;49757	20967;21946;23835;35547;35548;35549;49886	20967;21946;23835;35549;49886
Q86X55	CARM1	Histone-arginine methyltransferase CARM1 OS=Homo sapiens GN=CARM1 PE=1 SV=3	Histone-arginine methyltransferase CARM1	10	10	10	1	10	10	10	2	10	2	10	2	10	23.7	23.7	23.7	65.853	608	608	0	68.085	By matching	By MS/MS	3.3	23.7	197530000	15641	197510000	18253	197510000	0	13	13				1981	8;1117;1118;1620;2654;10924;12849;14397;18231;22581	True;True;True;True;True;True;True;True;True;True	9;1215;1216;1765;2860;11756;13805;15618;19894;24586	26;27;28;3078;3079;4474;7165;29259;29260;29261;34613;34614;34615;39217;49911;49912;62291	24;25;3022;3023;4323;7013;29200;34670;34671;39308;50018;62416;62417	24;3022;3023;4323;7013;29200;34670;39308;50018;62416
P49589	CARS	Cysteine--tRNA ligase, cytoplasmic OS=Homo sapiens GN=CARS PE=1 SV=3	Cysteine--tRNA ligase, cytoplasmic	14	14	14	1	14	14	14	2	13	2	13	2	13	25.9	25.9	25.9	85.472	748	748	0	323.31	By MS/MS	By MS/MS	2.8	24.7	94786000	50319	94736000	0	93996000	1	21	22				1107	493;1245;1449;3729;3854;3920;4307;6656;7323;10500;10828;13577;16455;21472	True;True;True;True;True;True;True;True;True;True;True;True;True;True	546;1353;1569;4011;4154;4237;4657;4658;7178;7900;11299;11651;14593;17978;23401	1415;3457;3458;4018;9980;9981;9982;10355;10549;10550;11571;11572;17586;17587;19474;28090;28091;28092;28978;28979;36657;45290;59302	1435;3359;3881;9697;9698;9699;9700;10142;10318;10319;11382;11383;17237;17238;19155;28009;28010;28011;28905;36673;45528;59425	1435;3359;3881;9697;10142;10319;11383;17237;19155;28011;28905;36673;45528;59425	1309	449
Q6P4E1	CASC4	Protein CASC4 OS=Homo sapiens GN=CASC4 PE=1 SV=1	Protein CASC4	2	2	2	1	2	2	2	0	2	0	2	0	2	4.4	4.4	4.4	48.864	433	433	0.00078709	13.98		By MS/MS	0	4.4	2211400	0	2211400	0	2211400	0	3	3				1895	5547;14665	True;True	5984;16015	14743;40210	14475;14476;40433	14475;40433
O14936	CASK	Peripheral plasma membrane protein CASK OS=Homo sapiens GN=CASK PE=1 SV=3	Peripheral plasma membrane protein CASK	17	17	17	1	17	17	17	0	17	0	17	0	17	27	27	27	105.12	926	926	0	116.27		By MS/MS	0	27	90000000	0	90000000	0	87615000	0	21	21				129	366;375;1770;3605;4427;5413;6380;7244;9963;9969;10800;12035;14418;14482;15404;18612;20498	True;True;True;True;True;True;True;True;True;True;True;True;True;True;True;True;True	397;398;410;1921;3881;4782;5843;6883;7813;10715;10721;11622;12935;15649;15749;16843;20292;22334	1060;1061;1096;1097;4851;4852;9699;11841;14368;14369;16859;19271;26572;26591;28913;32299;39295;39511;42420;51077;51078;56461;56462	1100;1101;1137;1138;1139;4716;9449;11623;14087;14088;16547;18971;26523;26551;28848;32288;39395;39611;42783;51260;56808	1101;1137;4716;9449;11623;14087;16547;18971;26523;26551;28848;32288;39395;39611;42783;51260;56808	81	122
P29466	CASP1	Caspase-1 OS=Homo sapiens GN=CASP1 PE=1 SV=1	Caspase-1;Caspase-1 subunit p20;Caspase-1 subunit p10	4;1	4;1	4;1	2	4	4	4	0	4	0	4	0	4	15.6	15.6	15.6	45.158	404	404;197	0	26.122		By MS/MS	0	15.6	29793000	0	29793000	0	29793000	0	5	5				877	1352;4254;9290;11645	True;True;True;True	1468;4601;10007;12524	3739;3740;11428;11429;24724;31258;31259	3614;11227;11228;24487;31121	3614;11228;24487;31121
P42574	CASP3	Caspase-3 OS=Homo sapiens GN=CASP3 PE=1 SV=2	Caspase-3;Caspase-3 subunit p17;Caspase-3 subunit p12	2	2	2	1	2	2	2	0	2	0	2	0	2	7.9	7.9	7.9	31.608	277	277	0.0007725	13.495		By MS/MS	0	7.9	3137100	0	3137100	0	3137100	0	3	3				1025	14210;17482	True;True	15353;19082	38641;47963;47964	38737;48133;48134	38737;48134
P20810	CAST	Calpastatin OS=Homo sapiens GN=CAST PE=1 SV=4	Calpastatin	4	4	4	1	4	4	4	0	4	0	4	0	4	14.1	14.1	14.1	76.572	708	708	0	41.615		By MS/MS	0	14.1	12412000	0	12412000	0	12412000	0	6	6				773	4340;5232;8721;11290	True;True;True;True	4691;5647;9399;12144	11658;11659;13883;13884;23224;30269;30270	11475;11476;13651;22781;30158;30159;30160	11475;13651;22781;30158
P04040	CAT	Catalase OS=Homo sapiens GN=CAT PE=1 SV=3	Catalase	4	4	4	1	4	4	4	2	4	2	4	2	4	9.5	9.5	9.5	59.755	527	527	0	27.416	By MS/MS	By MS/MS	4.2	9.5	27106000	68757	27037000	358830	26747000	2	6	8				426	511;4008;7021;13039	True;True;True;True	564;4334;7574;14020	1453;10799;10800;10801;18624;18625;18626;35206;35207;35208;35209	1467;10564;10565;18279;18280;18281;35268;35269	1467;10565;18280;35269
Q03135	CAV1	Caveolin-1 OS=Homo sapiens GN=CAV1 PE=1 SV=4	Caveolin-1	7;1	7;1	7;1	2	7	7	7	4	7	4	7	4	7	44.9	44.9	44.9	20.471	178	178;151	0	63.408	By MS/MS	By MS/MS	27	44.9	2028500000	5062800	2023500000	4449400	1997400000	5	21	26				1465	1549;1932;5358;5984;9186;9577;22888	True;True;True;True;True;True;True	1677;1678;2092;5784;6458;9896;10311;24917	4305;4306;4307;4308;4309;4310;4311;5291;5292;5293;14209;14210;14211;15839;24448;24449;24450;24451;24452;25462;25463;25464;25465;25466;25467;25468;63262;63263;63264;63265;63266	4170;4171;4172;4173;4174;4175;4176;5218;5219;13953;13954;15519;24142;24143;25294;25295;25296;25297;25298;25299;25300;63526;63527;63528;63529;63530	4171;5218;13954;15519;24142;25299;63527	1688	32
P16152	CBR1	Carbonyl reductase [NADPH] 1 OS=Homo sapiens GN=CBR1 PE=1 SV=3	Carbonyl reductase [NADPH] 1	15	15	13	1	15	15	13	6	15	6	15	5	13	74.4	74.4	63.9	30.375	277	277	0	258.72	By MS/MS	By MS/MS	33.9	74.4	399970000	681360	399290000	1327900	395200000	6	33	39				660	4378;5302;6487;6816;8045;8435;10234;12083;17053;17296;17971;18179;19361;19930;21840	True;True;True;True;True;True;True;True;True;True;True;True;True;True;True	4729;5724;7000;7347;8669;9093;10997;12990;18619;18878;19618;19837;21113;21717;21718;23801;23802	11732;11733;11734;14070;14071;14072;17114;17115;17116;18062;21412;21413;22491;22492;22493;22494;22495;22496;22497;27341;27342;32541;32542;32543;32544;46903;47510;47511;49272;49273;49274;49275;49276;49788;49789;49790;49791;49792;49793;53308;53309;53310;54847;54848;60417;60418;60419;60420;60421;60422;60423	11539;13809;13810;13811;16749;16750;16751;17731;21087;22111;22112;22113;22114;22115;22116;22117;27288;32709;32710;47108;47687;49427;49428;49429;49430;49431;49921;49922;49923;49924;49925;53634;55258;55259;60588;60589;60590;60591;60592;60593;60594	11539;13809;16750;17731;21087;22112;27288;32710;47108;47687;49429;49924;53634;55259;60594	640;641	111;142
O75828	CBR3	Carbonyl reductase [NADPH] 3 OS=Homo sapiens GN=CBR3 PE=1 SV=3	Carbonyl reductase [NADPH] 3	7	5	5	1	7	5	5	1	7	0	5	0	5	26.7	16.2	16.2	30.85	277	277	0	36.695	By matching	By MS/MS	5.8	26.7	21528000	0	21528000	0	21528000	0	5	5				305	740;6816;8044;8435;12308;17074;19360	True;False;True;False;True;True;True	803;7347;8668;9093;13228;18640;21112	2034;2035;18062;21411;22491;22492;22493;22494;22495;22496;22497;33162;33163;46956;46957;53306;53307	2034;17731;21086;22111;22112;22113;22114;22115;22116;22117;33332;47170;53633	2034;17731;21086;22112;33332;47170;53633
Q13185	CBX3	Chromobox protein homolog 3 OS=Homo sapiens GN=CBX3 PE=1 SV=4	Chromobox protein homolog 3	4	4	4	1	4	4	4	0	4	0	4	0	4	21.3	21.3	21.3	20.811	183	183	0	25.699		By MS/MS	0	21.3	4838400	0	4838400	0	4838400	0	5	5				1559	11385;13685;20285;22060	True;True;True;True	12246;14708;22104;24033	30487;37039;37040;37041;55859;61020	30380;37111;56243;56244;61208	30380;37111;56243;61208
Q6P1N0	CC2D1A	Coiled-coil and C2 domain-containing protein 1A OS=Homo sapiens GN=CC2D1A PE=1 SV=1	Coiled-coil and C2 domain-containing protein 1A	8	8	8	1	8	8	8	0	8	0	8	0	8	12.3	12.3	12.3	104.06	951	951	0	56.282		By MS/MS	0	12.3	31869000	0	31869000	0	31869000	0	10	10				1891	5936;8075;8387;11544;16375;16395;17318;22084	True;True;True;True;True;True;True;True	6408;8701;9038;12413;17889;17910;18902;24059	15725;21514;21515;21516;21517;22342;30918;45072;45073;45127;45128;47562;47563;61069;61070	15424;21226;21227;21228;21953;21954;30806;45351;45402;47733;61256	15424;21228;21953;30806;45351;45402;47733;61256
Q5T0F9	CC2D1B	Coiled-coil and C2 domain-containing protein 1B OS=Homo sapiens GN=CC2D1B PE=1 SV=1	Coiled-coil and C2 domain-containing protein 1B	3	3	3	1	3	3	3	1	3	1	3	1	3	3.1	3.1	3.1	94.223	858	858	0.00043141	18.33	By matching	By MS/MS	0.9	3.1	3260100	419330	2840800	0	2840800	0	3	3				1839	572;5445;11946	True;True;True	629;5877;12842	1623;14482;14483;32093;32094	1637;14249;32096	1637;14249;32096
Q6YP21	CCBL2	Kynurenine--oxoglutarate transaminase 3 OS=Homo sapiens GN=CCBL2 PE=1 SV=1	Kynurenine--oxoglutarate transaminase 3	6	6	6	1	6	6	6	0	6	0	6	0	6	18.5	18.5	18.5	51.4	454	454	0	44.281		By MS/MS	0	18.5	18686000	0	18686000	0	17084000	0	8	8				1923	1110;4247;9488;11445;14022;14067	True;True;True;True;True;True	1208;4593;10220;12311;15067;15068;15133	3066;3067;11398;25239;25240;30631;30632;37997;37998;38150;38151	3015;11196;25064;30501;30502;38082;38083;38084;38239	3015;11196;25064;30502;38083;38239	1968	168
Q96JG6	CCDC132	Coiled-coil domain-containing protein 132 OS=Homo sapiens GN=CCDC132 PE=1 SV=3	Coiled-coil domain-containing protein 132	4	4	4	1	4	4	4	0	4	0	4	0	4	5.4	5.4	5.4	111.17	964	964	0	28.506		By MS/MS	0	5.4	9260100	0	9260100	0	9260100	0	4	4				2237	5205;9404;13107;17909	True;True;True;True	5617;10130;14092;19551	13794;25020;35386;49106	13564;24869;35457;49258	13564;24869;35457;49258
O60826	CCDC22	Coiled-coil domain-containing protein 22 OS=Homo sapiens GN=CCDC22 PE=1 SV=1	Coiled-coil domain-containing protein 22	6	6	6	1	6	6	6	0	6	0	6	0	6	15.5	15.5	15.5	70.755	627	627	0	177.04		By MS/MS	0	15.5	41483000	0	41483000	0	41483000	0	13	13				256	2265;3720;5145;13122;19241;20035	True;True;True;True;True;True	2452;4002;5551;14107;20974;21834	6184;6185;9964;9965;13651;13652;13653;13654;35414;35415;35416;35417;52915;52916;55179	6077;9684;13433;13434;13435;35483;35484;35485;35486;35487;53202;53203;55613	6077;9684;13434;35483;53203;55613
Q96A33	CCDC47	Coiled-coil domain-containing protein 47 OS=Homo sapiens GN=CCDC47 PE=1 SV=1	Coiled-coil domain-containing protein 47	7	7	7	1	7	7	7	1	7	1	7	1	7	25.1	25.1	25.1	55.873	483	483	0	107.17	By MS/MS	By MS/MS	3.5	25.1	46889000	18218	46870000	0	45386000	1	15	16				2168	3853;5657;5808;10331;13014;19259;22423	True;True;True;True;True;True;True	4152;4153;6099;6265;11113;13993;20993;24419	10351;10352;10353;10354;15016;15017;15018;15396;15397;27628;27629;35147;52984;52985;61899;61900;61901;61902	10140;10141;14735;14736;14737;15093;15094;27573;35217;35218;53272;62037;62038;62039;62040;62041	10141;14736;15094;27573;35218;53272;62041	2034	376
Q76M96	CCDC80	Coiled-coil domain-containing protein 80 OS=Homo sapiens GN=CCDC80 PE=1 SV=1	Coiled-coil domain-containing protein 80	6	6	6	1	6	6	6	0	6	0	6	0	6	8.2	8.2	8.2	108.17	950	950	0	56.556		By MS/MS	0	8.2	23587000	0	23587000	0	23587000	0	8	8				1930	4954;10780;11820;18339;18429;21751	True;True;True;True;True;True	5345;11601;12712;20004;20099;23703	13175;13176;28873;31799;50206;50479;60166;60167;60168	12951;28813;31818;31819;50327;50595;60355;60356	12951;28813;31818;50327;50595;60355
Q567U6	CCDC93	Coiled-coil domain-containing protein 93 OS=Homo sapiens GN=CCDC93 PE=1 SV=2	Coiled-coil domain-containing protein 93	4	4	4	1	4	4	4	0	4	0	4	0	4	7.4	7.4	7.4	73.197	631	631	0	27.31		By MS/MS	0	7.4	8038400	0	8038400	0	8038400	0	6	6				1817	4093;9262;13269;16563	True;True;True;True	4427;9976;14269;18096	11028;24650;35797;35798;45552	10814;24415;24416;35843;45763;45764	10814;24416;35843;45763
P14635	CCNB1	G2/mitotic-specific cyclin-B1 OS=Homo sapiens GN=CCNB1 PE=1 SV=1	G2/mitotic-specific cyclin-B1	2	2	2	1	2	2	2	1	2	1	2	1	2	6.9	6.9	6.9	48.337	433	433	0	20.312	By MS/MS	By MS/MS	3.9	6.9	7439500	48554	7391000	0	7391000	1	3	4				637	9889;10687	True;True	10637;11504	26372;28617;28618;28619;28620	26354;28567;28568;28569	26354;28569
Q8ND76	CCNY	Cyclin-Y OS=Homo sapiens GN=CCNY PE=1 SV=2	Cyclin-Y	2	2	2	1	2	2	2	0	2	0	2	0	2	9.4	9.4	9.4	39.336	341	341	0.00075472	12.941		By MS/MS	0	9.4	78016000	0	78016000	0	78016000	0	3	3				2053	14409;17654	True;True	15637;19272	39269;48439;48440;48441;48442	39372;48663;48664	39372;48663	1999	140
P78371	CCT2	T-complex protein 1 subunit beta OS=Homo sapiens GN=CCT2 PE=1 SV=4	T-complex protein 1 subunit beta	25	25	25	1	25	25	25	8	25	8	25	8	25	67.1	67.1	67.1	57.488	535	535	0	323.31	By MS/MS	By MS/MS	22.1	67.1	1353900000	804090	1353100000	2307600	1296800000	6	78	84				1397	144;1980;2892;4738;4802;5291;7491;8557;9951;10212;10213;11537;11597;12191;12406;13644;14423;15082;16021;16361;16688;17754;19856;21091;21354	True;True;True;True;True;True;True;True;True;True;True;True;True;True;True;True;True;True;True;True;True;True;True;True;True	154;155;2141;3118;3119;5111;5183;5713;8082;9225;10701;10973;10974;10975;12405;12471;13107;13333;14664;15655;15656;16481;17510;17873;18232;19381;21636;21637;22976;23276	389;390;391;392;393;394;395;5405;5406;5407;5408;7889;7890;7891;7892;12644;12645;12646;12647;12813;12814;14048;14049;14050;19958;19959;22793;22794;26539;26540;26541;26542;27260;27261;27262;27263;27264;27265;30900;30901;30902;30903;31105;31106;31107;32872;32873;32874;32875;33384;33385;36880;36881;36882;39314;39315;39316;39317;39318;39319;39320;39321;39322;39323;39324;39325;39326;39327;41345;41346;4…	427;428;429;430;431;5336;5337;5338;7732;7733;7734;7735;7736;12432;12433;12434;12435;12436;12610;13795;13796;19657;19658;22383;22384;26496;27168;27169;27170;27171;27172;30790;30791;30792;30793;30794;30971;33080;33081;33082;33533;33534;36917;36918;39436;39437;39438;39439;39440;39441;39442;39443;39444;39445;39446;39447;39448;39449;39450;41535;41536;44483;44484;44485;45325;45326;45327;46071;46072;460…	431;5336;7736;12435;12610;13796;19657;22384;26496;27170;27172;30793;30971;33081;33533;36917;39447;41536;44483;45325;46074;48881;55055;58426;59148	1621;1622;1623;1624;1625;1626	62;244;353;417;445;480
P49368	CCT3	T-complex protein 1 subunit gamma OS=Homo sapiens GN=CCT3 PE=1 SV=4	T-complex protein 1 subunit gamma	25	25	25	1	25	25	25	5	25	5	25	5	25	59.3	59.3	59.3	60.533	545	545	0	232.16	By MS/MS	By MS/MS	9.4	59.3	861820000	618620	861200000	785000	749260000	1	64	65				1101	1255;1256;1593;2221;4865;5405;5615;8088;9336;9559;9866;10272;10632;10886;11152;14410;14687;14688;15236;15643;15890;16159;18683;19251;22125	True;True;True;True;True;True;True;True;True;True;True;True;True;True;True;True;True;True;True;True;True;True;True;True;True	1363;1364;1365;1736;2401;5252;5835;6054;8717;10057;10058;10293;10612;11039;11040;11443;11714;12001;15638;15639;16046;16047;16649;17100;17101;17369;17660;20375;20985;24103	3475;3476;3477;3478;3479;3480;3481;4417;6043;6044;6045;6046;6047;6048;12983;14339;14340;14341;14342;14343;14914;14915;21559;21560;24826;24827;24828;24829;24830;25413;25414;25415;25416;26319;26320;27435;27436;27437;27438;28459;28460;28461;28462;28463;28464;29138;29139;29140;29141;29142;29913;29914;29915;29916;39270;39271;39272;39273;39274;39275;39276;39277;39278;40293;40294;40295;40296;41757;43026…	3372;3373;3374;3375;3376;4276;5923;5924;5925;5926;5927;12771;14063;14064;14065;14646;14647;21267;21268;24583;24584;24585;24586;24587;25255;26311;26312;27385;27386;27387;28423;28424;28425;28426;29085;29086;29087;29088;29089;29849;29850;39373;39374;39375;39376;39377;39378;39379;39380;39381;40515;40516;41932;43404;43405;43406;43407;43408;43409;44099;44848;51512;51513;53233;53234;53235;61337	3375;3376;4276;5925;12771;14064;14647;21268;24585;25255;26312;27387;28423;29086;29849;39377;40515;40516;41932;43409;44099;44848;51513;53233;61337	1289;1290;1291;1292;1293;1294;1295;1296	49;54;59;133;270;416;429;490
P50991	CCT4	T-complex protein 1 subunit delta OS=Homo sapiens GN=CCT4 PE=1 SV=4	T-complex protein 1 subunit delta	21	21	21	1	21	21	21	5	21	5	21	5	21	51.2	51.2	51.2	57.924	539	539	0	309.68	By MS/MS	By MS/MS	8.7	51.2	694090000	305410	693780000	363590	677310000	1	52	53				1146	719;1350;1748;2489;2871;6235;7156;7651;8034;8035;8051;9563;12197;13765;14355;18765;18973;19293;19844;20679;21864	True;True;True;True;True;True;True;True;True;True;True;True;True;True;True;True;True;True;True;True;True	779;780;1466;1899;2689;3094;6727;7721;8249;8658;8659;8676;10297;13113;14796;15553;20461;20462;20686;21033;21624;22527;23827;23828	1976;1977;1978;1979;1980;1981;1982;1983;1984;3735;3736;3737;4802;6789;6790;6791;6792;7817;7818;16466;16467;16468;18990;20410;20411;20412;21387;21388;21389;21426;21427;21428;25426;25427;32889;32890;32891;32892;32893;37252;37253;37254;37255;39039;51555;51556;51557;52140;52141;52142;53078;53079;54633;54634;54635;56961;56962;56963;56964;56965;60473;60474;60475;60476	1984;1985;1986;1987;1988;1989;1990;1991;1992;1993;1994;1995;3610;3611;3612;4659;6650;6651;6652;7662;16146;16147;16148;18661;20189;21060;21061;21099;21100;25264;25265;33097;33098;33099;33100;37363;39133;51728;51729;51730;52413;52414;53370;53371;55016;57296;57297;57298;57299;57300;60638;60639;60640;60641	1986;3610;4659;6651;7662;16146;18661;20189;21060;21061;21099;25265;33097;37363;39133;51728;52413;53370;55016;57296;60639	1338;1339;1340	192;272;458
P48643	CCT5	T-complex protein 1 subunit epsilon OS=Homo sapiens GN=CCT5 PE=1 SV=1	T-complex protein 1 subunit epsilon	30	30	30	1	30	30	30	4	30	4	30	4	30	69.5	69.5	69.5	59.67	541	541	0	287.81	By matching	By MS/MS	6.5	69.5	1118000000	496690	1117500000	638700	1010800000	0	74	74				1088	718;1985;1986;2408;3254;4291;4385;5803;6213;6664;7124;8792;9421;9451;10590;11794;12166;12901;12928;14344;14447;14475;16427;16512;16517;17753;19589;19980;21892;22154	True;True;True;True;True;True;True;True;True;True;True;True;True;True;True;True;True;True;True;True;True;True;True;True;True;True;True;True;True;True	777;778;2145;2146;2147;2603;3512;4641;4737;6259;6260;6705;7187;7686;9474;9475;10147;10179;11393;12685;13080;13860;13900;15540;15688;15689;15739;15740;17942;18041;18046;18047;19380;21353;21771;23858;24134	1966;1967;1968;1969;1970;1971;1972;1973;1974;1975;5414;5415;5416;5417;5418;5419;5420;5421;5422;5423;5424;5425;6549;6550;8774;8775;8776;11534;11747;11748;11749;15384;15385;15386;16428;16429;16430;16431;17618;18917;18918;23442;23443;23444;25057;25058;25119;25120;25121;25122;28314;28315;28316;28317;31742;32819;32820;32821;34786;34787;34875;34876;34877;39015;39016;39390;39391;39392;39495;39496;45202;…	1974;1975;1976;1977;1978;1979;1980;1981;1982;1983;5342;5343;5344;5345;5346;5347;5348;5349;5350;6410;8587;8588;11353;11548;11549;11550;15086;15087;16113;16114;16115;17270;18587;18588;23000;23001;23002;24899;24954;24955;24956;28213;28214;28215;28216;31771;33035;33036;33037;34880;34945;39116;39507;39508;39509;39595;39596;39597;45460;45660;45667;45668;45669;48877;48878;48879;48880;54294;55360;55361;6…	1977;5342;5348;6410;8588;11353;11549;15087;16114;17270;18587;23001;24899;24955;28214;31771;33037;34880;34945;39116;39508;39596;45460;45660;45669;48878;54294;55360;60732;61390	1262;1263;1264;1265;1266;1267;1268;1269	4;81;239;371;460;468;485;523
P40227	CCT6A	T-complex protein 1 subunit zeta OS=Homo sapiens GN=CCT6A PE=1 SV=3	T-complex protein 1 subunit zeta	22;4	22;4	22;4	2	22	22	22	5	22	5	22	5	22	57.6	57.6	57.6	58.024	531	531;530	0	259.19	By MS/MS	By MS/MS	12.2	57.6	772810000	617620	772190000	777650	763770000	5	68	73				1000	1451;1726;1802;3320;5786;6234;7867;8026;8257;8288;9156;10086;11317;13594;14450;14769;15919;18487;20040;20094;20619;20841	True;True;True;True;True;True;True;True;True;True;True;True;True;True;True;True;True;True;True;True;True;True	1571;1876;1953;3581;3582;6236;6726;8480;8649;8895;8926;9863;10843;12173;14610;15693;15694;16148;17400;20160;21839;21895;22461;22711	4021;4022;4023;4024;4025;4026;4759;4939;4940;4941;4942;8953;8954;8955;8956;8957;15313;15314;15315;16464;16465;20952;20953;20954;20955;20956;21359;21360;21361;22012;22013;22014;22083;24377;26960;26961;30330;36694;36695;39397;39398;39399;39400;39401;40565;40566;40567;40568;40569;40570;43834;43835;43836;43837;50649;50650;55188;55189;55190;55191;55192;55193;55194;55195;55196;55197;55324;56818;56819;5…	3883;3884;3885;3886;3887;4612;4613;4614;4615;4833;4834;4835;4836;4837;4838;4839;8749;8750;8751;8752;8753;15009;15010;15011;16145;20672;20673;20674;21037;21667;21728;24060;26885;30220;36705;36706;36707;39513;39514;39515;39516;40766;40767;40768;40769;40770;40771;40772;40773;44182;44183;44184;44185;50765;50766;55622;55623;55624;55625;55626;55627;55628;55629;55630;55631;55756;57147;57148;57149;57150;…	3887;4613;4837;8752;15010;16145;20673;21037;21667;21728;24060;26885;30220;36706;39513;40772;44184;50766;55626;55756;57151;57794	1172;1173;1174	46;67;196
Q99832	CCT7	T-complex protein 1 subunit eta OS=Homo sapiens GN=CCT7 PE=1 SV=2	T-complex protein 1 subunit eta	25	25	25	1	25	25	25	8	24	8	24	8	24	60	60	60	59.366	543	543	0	323.31	By MS/MS	By MS/MS	19.5	60	656370000	818140	655550000	1134400	576620000	8	81	89				2308	1297;2139;2716;3857;5288;7874;9457;10348;10349;11409;12611;13072;14474;14528;14701;14884;16314;16518;17752;18035;18948;19343;20660;21371;22664	True;True;True;True;True;True;True;True;True;True;True;True;True;True;True;True;True;True;True;True;True;True;True;True;True	1411;2311;2930;4157;5709;8487;8488;10186;11138;11139;12272;13551;14055;15736;15737;15738;15815;16065;16066;16275;16276;17825;18048;19379;19685;20661;21089;21090;22503;23293;24678	3593;3594;3595;5813;5814;5815;7410;7411;7412;10361;10362;10363;14039;14040;14041;14042;14043;20978;20979;20980;20981;20982;20983;20984;25141;25142;25143;25144;27678;27679;27680;27681;27682;30549;33952;33953;33954;33955;33956;33957;35289;35290;35291;39485;39486;39487;39488;39489;39490;39491;39492;39493;39494;39671;40345;40346;40347;40348;40349;40350;40351;40352;40879;40880;40881;40882;44903;44904;…	3485;3486;3487;5724;5725;7291;7292;7293;10147;13783;13784;13785;13786;13787;13788;13789;20692;20693;20694;20695;20696;20697;20698;24972;24973;24974;24975;27617;27618;27619;27620;27621;27622;27623;30433;34054;34055;35351;35352;39586;39587;39588;39589;39590;39591;39592;39593;39594;39776;40566;40567;40568;40569;40570;40571;41065;41066;41067;41068;41069;41070;41071;41072;45200;45201;45202;45670;45671…	3487;5725;7292;10147;13783;20695;24974;27617;27622;30433;34054;35352;39592;39776;40570;41066;45200;45670;48875;49609;52334;53531;57237;59182;62663	2106;2107;2108;2109;2110;2111;2112;2113	1;2;178;184;323;324;382;414
P50990	CCT8	T-complex protein 1 subunit theta OS=Homo sapiens GN=CCT8 PE=1 SV=4	T-complex protein 1 subunit theta	27	27	27	1	27	27	27	8	27	8	27	8	27	56.6	56.6	56.6	59.62	548	548	0	220.93	By MS/MS	By MS/MS	17.2	56.6	644200000	2385000	641810000	4046000	626770000	2	60	62				1145	1001;1048;2237;3423;3870;5596;6202;7687;8615;9030;9070;9508;10202;11590;12104;13821;13928;14672;15621;16279;16280;16753;18611;18692;19778;19927;22674	True;True;True;True;True;True;True;True;True;True;True;True;True;True;True;True;True;True;True;True;True;True;True;True;True;True;True	1085;1140;2419;3693;4177;4178;6035;6694;8286;8287;9288;9289;9727;9770;10240;10241;10963;12462;13011;14853;14968;16024;17076;17788;17789;18303;20291;20385;21552;21713;21714;24689	2770;2771;2880;2881;2882;6100;6101;6102;9241;9242;9243;9244;10415;10416;10417;10418;14868;14869;16409;16410;20506;20507;22951;22952;22953;22954;22955;22956;22957;22958;24135;24218;25301;25302;25303;27243;31068;31069;31070;31071;32595;32596;32597;37411;37412;37413;37414;37750;37751;40229;40230;42974;42975;42976;44786;44787;44788;44789;44790;44791;44792;46091;46092;46093;51072;51073;51074;51075;510…	2728;2729;2730;2846;2847;2848;2849;5999;6000;9012;9013;9014;9015;9016;9017;10190;10191;14597;16099;16100;20280;20281;22531;22532;22533;22534;22535;22536;23761;23762;23867;25137;25138;25139;27151;30944;32765;32766;37506;37847;37848;40453;43356;43357;43358;43359;43360;45090;45091;45092;45093;45094;45095;46277;51257;51258;51259;51544;54797;54798;55253;55254;55255;62684;62685;62686	2729;2846;5999;9016;10191;14597;16099;20280;22535;23762;23867;25137;27151;30944;32765;37506;37847;40453;43359;45090;45094;46277;51259;51544;54798;55254;62686	1333;1334;1335;1336;1337	249;276;300;385;492
P86791	CCZ1	Vacuolar fusion protein CCZ1 homolog OS=Homo sapiens GN=CCZ1 PE=1 SV=1;Vacuolar fusion protein CCZ1 homolog B OS=Homo sapiens GN=CCZ1B PE=1 SV=1	Vacuolar fusion protein CCZ1 homolog;Vacuolar fusion protein CCZ1 homolog B	2;2	2;2	2;2	2	2	2	2	0	2	0	2	0	2	6	6	6	55.866	482	482;482	0.00081766	15.561		By MS/MS	0	6	9208300	0	9208300	0	9208300	0	2	2				1422	11;643	True;True	12;702	59;60;1803;1804	64;1802	64;1802
Q6YHK3	CD109	CD109 antigen OS=Homo sapiens GN=CD109 PE=1 SV=2	CD109 antigen	4	4	4	1	4	4	4	0	4	0	4	0	4	4.5	4.5	4.5	161.69	1445	1445	0	35.775		By MS/MS	0	4.5	12022000	0	12022000	0	12022000	0	4	4				1921	418;19310;19368;21520	True;True;True;True	458;21051;21121;23453	1209;53131;53132;53334;59409	1235;53437;53665;59530	1235;53437;53665;59530
P48509	CD151	CD151 antigen OS=Homo sapiens GN=CD151 PE=1 SV=3	CD151 antigen	2	2	2	1	2	2	2	0	2	0	2	0	2	7.5	7.5	7.5	28.295	253	253	0.00073368	12.171		By MS/MS	0	7.5	48775000	0	48775000	0	48775000	0	3	3				1085	11989;19850	True;True	12887;21630	32188;54654;54655	32180;55043;55044	32180;55043
Q5ZPR3	CD276	CD276 antigen OS=Homo sapiens GN=CD276 PE=1 SV=1	CD276 antigen	7	7	7	1	7	7	7	2	7	2	7	2	7	33.9	33.9	33.9	57.235	534	534	0	232.46	By MS/MS	By MS/MS	8.2	33.9	129770000	284670	129480000	368190	129400000	2	16	18				1859	2725;3153;3780;15414;15857;16559;18017	True;True;True;True;True;True;True	2939;3400;4071;16854;17332;18091;19666	7425;7426;8503;10118;42441;42442;42443;42444;42445;43605;43606;45545;49397;49398;49399;49400;49401;49402;49403	7304;7305;8351;9817;42801;42802;42803;43939;45755;45756;49549;49550;49551;49552;49553;49554;49555;49556	7304;8351;9817;42802;43939;45755;49552
P16070	CD44	CD44 antigen OS=Homo sapiens GN=CD44 PE=1 SV=3	CD44 antigen	8	8	8	1	8	8	8	1	8	1	8	1	8	13.6	13.6	13.6	81.537	742	742	0	72.384	By matching	By MS/MS	1.3	13.6	1268300000	74098	1268200000	0	1226700000	0	31	31				658	1481;6146;13773;15249;18047;18800;19381;22398	True;True;True;True;True;True;True;True	1602;6632;6633;14804;16662;19698;19699;20501;21135;24391	4096;4097;16221;16222;16223;16224;16225;16226;16227;37289;37290;37291;41789;41790;41791;49477;49478;49479;49480;49481;51695;51696;51697;53362;53363;61834;61835;61836;61837	3958;3959;3960;15892;15893;15894;15895;15896;15897;15898;15899;37404;37405;37406;41971;41972;49626;49627;49628;49629;51938;51939;51940;51941;53690;53691;53692;61968;61969;61970;61971;61972	3960;15898;37404;41971;49629;51938;53691;61972	637;638	709;725
P15529	CD46	Membrane cofactor protein OS=Homo sapiens GN=CD46 PE=1 SV=3	Membrane cofactor protein	2	2	2	1	2	2	2	0	2	0	2	0	2	6.1	6.1	6.1	43.747	392	392	0.00072307	11.698		By MS/MS	0	6.1	5153900	0	5153900	0	5153900	0	2	2				651	2191;8623	True;True	2367;9297	5953;5954;22981	5846;22560	5846;22560
Q08722	CD47	Leukocyte surface antigen CD47 OS=Homo sapiens GN=CD47 PE=1 SV=1	Leukocyte surface antigen CD47	3	3	3	1	3	3	3	1	3	1	3	1	3	8.7	8.7	8.7	35.213	323	323	0	19.352	By matching	By MS/MS	2.5	8.7	133320000	338910	132980000	0	132980000	0	5	5				1510	5200;9777;18397	True;True;True	5612;10517;20066	13783;25958;25959;25960;25961;25962;50388	13554;25780;25781;25782;50500	13554;25780;50500
P08174	CD55	Complement decay-accelerating factor OS=Homo sapiens GN=CD55 PE=1 SV=4	Complement decay-accelerating factor	10	10	10	1	10	10	10	3	10	3	10	3	10	30.4	30.4	30.4	41.4	381	381	0	69.809	By MS/MS	By MS/MS	7.3	30.4	299200000	1021300	298180000	1620200	285020000	1	21	22				507	4255;5454;7857;13023;13529;16600;17034;17046;19573;22126	True;True;True;True;True;True;True;True;True;True	4602;5886;8469;8470;14002;14542;18135;18600;18612;21336;24104	11430;14522;14523;14524;14525;20929;20930;20931;20932;35159;35160;35161;36524;36525;36526;45627;46864;46865;46887;46888;53902;53903;53904;53905;53906;61162;61163	11229;14290;14291;14292;14293;14294;20651;20652;20653;20654;20655;20656;35232;36549;45837;47065;47091;54234;54235;54236;54237;61338	11229;14290;20656;35232;36549;45837;47065;47091;54235;61338	433	259
P13987	CD59	CD59 glycoprotein OS=Homo sapiens GN=CD59 PE=1 SV=1	CD59 glycoprotein	4	4	4	1	4	4	4	2	4	2	4	2	4	25	25	25	14.177	128	128	0	64.815	By MS/MS	By MS/MS	15.6	25	424160000	30935	424130000	0	424130000	2	19	21				627	902;5837;6675;13326	True;True;True;True	979;6302;7198;14330	2507;2508;2509;2510;2511;2512;2513;15481;15482;17654;17655;17656;17657;17658;17659;35999;36000	2476;2477;2478;2479;2480;2481;2482;2483;15171;17309;17310;17311;17312;17313;17314;17315;17316;17317;36053;36054;36055	2480;15171;17310;36054
P08962	CD63	CD63 antigen OS=Homo sapiens GN=CD63 PE=1 SV=2	CD63 antigen	2	2	2	1	2	2	2	1	2	1	2	1	2	7.6	7.6	7.6	25.636	238	238	0.00042481	17.545	By MS/MS	By MS/MS	4.2	7.6	86165000	1039700	85125000	0	79895000	2	6	8				526	16519;21157	True;True	18049;23058;23059	45446;45447;58441;58442;58443;58444;58445;58446;58447;58448;58449	45672;58622;58623;58624;58625;58626;58627;58628	45672;58628	471	112
P60033	CD81	CD81 antigen OS=Homo sapiens GN=CD81 PE=1 SV=1	CD81 antigen	4	4	4	1	4	4	4	2	3	2	3	2	3	28.4	28.4	28.4	25.809	236	236	0	143.17	By MS/MS	By MS/MS	11.9	25	920500000	1053700	919450000	0	872610000	3	28	31				1252	9560;15339;16142;18932	True;True;True;True	10294;16774;17643;20644	25417;25418;25419;42256;42257;42258;44454;44455;44456;44457;44458;44459;44460;44461;44462;44463;44464;44465;52011;52012;52013;52014;52015	25256;25257;42620;42621;42622;44796;44797;44798;44799;44800;44801;44802;44803;44804;44805;44806;44807;44808;44809;44810;44811;44812;44813;44814;44815;52278;52279;52280;52281;52282;52283	25257;42621;44798;52282
P21926	CD9	CD9 antigen OS=Homo sapiens GN=CD9 PE=1 SV=4	CD9 antigen	3	3	3	1	3	3	3	0	3	0	3	0	3	15.4	15.4	15.4	25.416	228	228	0	31.693		By MS/MS	0	15.4	237370000	0	237370000	0	237370000	0	7	7				785	1100;4432;11073	True;True;True	1198;4787;11920	3043;3044;11854;11855;29735;29736	2995;2996;2997;11633;11634;29698;29699	2997;11633;29699
P48960	CD97	CD97 antigen OS=Homo sapiens GN=CD97 PE=1 SV=4	CD97 antigen;CD97 antigen subunit alpha;CD97 antigen subunit beta	8;1	8;1	8;1	2	8	8	8	1	8	1	8	1	8	14.6	14.6	14.6	91.868	835	835;823	0	68.499	By MS/MS	By MS/MS	1.2	14.6	59011000	1211700	57800000	0	57800000	1	15	16				1094	4351;7122;7914;13713;15677;15927;19620;22773	True;True;True;True;True;True;True;True	4702;7684;8533;14737;17138;17408;21386;24796	11680;11681;18913;18914;18915;21079;21080;37125;37126;37127;37128;43145;43146;43857;43858;54018;54019;62971;62972;62973;62974	11494;18584;18585;20791;20792;37224;37225;37226;43524;44202;44203;54358;54359;63247;63248;63249	11494;18585;20791;37226;43524;44203;54358;63249
P14209	CD99	CD99 antigen OS=Homo sapiens GN=CD99 PE=1 SV=1	CD99 antigen	4	4	4	1	4	4	4	0	4	0	4	0	4	45.4	45.4	45.4	18.848	185	185	0	85.077		By MS/MS	0	45.4	117120000	0	117120000	0	104690000	0	13	13				630	5827;11307;14783;15828	True;True;True;True	6291;6292;12162;16164;17301	15452;15453;15454;15455;15456;30307;30308;30309;30310;40618;43532;43533;43534;43535;43536	15144;15145;15146;15147;15148;30199;30200;30201;40817;43872;43873;43874;43875	15146;30199;40817;43875	594	166
Q8TCZ2	CD99L2	CD99 antigen-like protein 2 OS=Homo sapiens GN=CD99L2 PE=1 SV=1	CD99 antigen-like protein 2	3	3	3	1	3	3	3	0	3	0	3	0	3	17.2	17.2	17.2	27.986	262	262	0	35.412		By MS/MS	0	17.2	11368000	0	11368000	0	11368000	0	3	3				2081	3629;6570;7742	True;True;True	3907;7085;8348	9758;17332;20666	9505;16963;20421	9505;16963;20421
Q8IWY9	CDAN1	Codanin-1 OS=Homo sapiens GN=CDAN1 PE=1 SV=4	Codanin-1	2	2	2	1	2	2	2	0	2	0	2	0	2	0.8	0.8	0.8	134.12	1227	1227	0.00079177	14.112		By MS/MS	0	0.8	1680700	0	1680700	0	1680700	0	2	2				2002	285;14010	True;True	311;15051	825;826;37965;37966	851;38053	851;38053
Q13042	CDC16	Cell division cycle protein 16 homolog OS=Homo sapiens GN=CDC16 PE=1 SV=2	Cell division cycle protein 16 homolog	2	2	2	1	2	2	2	0	2	0	2	0	2	3.2	3.2	3.2	71.655	620	620	0.00075019	12.83		By MS/MS	0	3.2	1879500	0	1879500	0	1879500	0	2	2				1544	5656;11639	True;True	6098;12518	15015;31242;31243	14734;31104	14734;31104
Q9UJX2	CDC23	Cell division cycle protein 23 homolog OS=Homo sapiens GN=CDC23 PE=1 SV=3	Cell division cycle protein 23 homolog	4	4	4	1	4	4	4	0	4	0	4	0	4	10.7	10.7	10.7	68.833	597	597	0	24.691		By MS/MS	0	10.7	6091100	0	6091100	0	6091100	0	4	4				2674	251;2468;11209;21527	True;True;True;True	275;2665;12060;23461	723;6718;30084;59428	750;6558;30001;59542	750;6558;30001;59542
Q16543	CDC37	Hsp90 co-chaperone Cdc37 OS=Homo sapiens GN=CDC37 PE=1 SV=1	Hsp90 co-chaperone Cdc37;Hsp90 co-chaperone Cdc37, N-terminally processed	4	4	4	1	4	4	4	0	4	0	4	0	4	15.3	15.3	15.3	44.468	378	378	0	34.157		By MS/MS	0	15.3	18209000	0	18209000	0	18209000	0	7	7				1757	2627;4478;12250;16760	True;True;True;True	2833;4834;13167;18310	7113;11960;33004;33005;33006;46104	6957;11735;33193;33194;33195;33196;46286	6957;11735;33195;46286	1914	249
P60953	CDC42	Cell division control protein 42 homolog OS=Homo sapiens GN=CDC42 PE=1 SV=2	Cell division control protein 42 homolog	7;1	6;0	6;0	2	7	6	6	3	7	2	6	2	6	36.6	30.9	30.9	21.258	191	191;214	0	63.992	By MS/MS	By MS/MS	21.5	36.6	916640000	860860	915780000	1689000	914950000	5	21	26				1264	2772;3026;15616;19424;19425;22159;22890	False;True;True;True;True;True;True	2990;3262;17071;21178;21179;24139;24919	7539;7540;7541;8216;8217;42957;42958;42959;42960;42961;42962;42963;42964;42965;42966;53477;53478;53479;53480;53481;53482;61228;63269;63270;63271;63272	7399;7400;8084;8085;43339;43340;43341;43342;43343;43344;43345;43346;43347;43348;53812;53813;53814;53815;53816;61398;61399;63532;63533;63534;63535;63536;63537;63538;63539	7399;8084;43343;53814;53816;61398;63534
Q5VT25	CDC42BPA	Serine/threonine-protein kinase MRCK alpha OS=Homo sapiens GN=CDC42BPA PE=1 SV=1	Serine/threonine-protein kinase MRCK alpha	12	9	9	1	12	9	9	1	12	0	9	0	9	9.6	8	8	197.3	1732	1732	0	70.312	By matching	By MS/MS	0.5	9.6	29201000	0	29201000	0	29201000	0	12	12				1850	2007;3060;4822;5594;7061;7417;9975;11465;14019;14623;19697;21587	True;True;True;True;True;False;True;False;True;False;True;True	2170;3296;5204;6032;7617;8003;10727;12331;15063;15958;21468;23525	5467;5468;8274;12864;14862;18731;18732;19750;19751;19752;26600;30696;30697;37991;40081;40082;54241;54242;59622	5386;5387;8145;12667;14593;18392;18393;19464;26561;30553;38076;38077;40289;54580;59751	5386;8145;12667;14593;18393;19464;26561;30553;38076;40289;54580;59751
Q9Y5S2	CDC42BPB	Serine/threonine-protein kinase MRCK beta OS=Homo sapiens GN=CDC42BPB PE=1 SV=2	Serine/threonine-protein kinase MRCK beta	13;1;1	13;1;1	10;0;1	3	13	13	10	2	13	2	13	1	10	9.9	9.9	8.2	194.31	1711	1711;629;1551	0	89.71	By matching	By MS/MS	1.2	9.9	96382000	48052	96334000	42435	96339000	0	20	20				2807	1120;3238;3575;7062;7417;11465;11938;14623;15467;18377;19329;19623;20649	True;True;True;True;True;True;True;True;True;True;True;True;True	1218;3494;3850;7618;8003;12331;12834;15958;16910;20046;21073;21389;22492	3081;3082;3083;3084;8731;9627;9628;18733;18734;18735;19750;19751;19752;30696;30697;32084;40081;40082;42588;42589;50337;53189;53190;54023;54024;56885	3025;8547;8548;9387;9388;18394;18395;18396;18397;19464;30553;32087;40289;42947;50444;50445;53500;53501;54363;57207	3025;8548;9387;18397;19464;30553;32087;40289;42947;50445;53500;54363;57207
Q9H5V8	CDCP1	CUB domain-containing protein 1 OS=Homo sapiens GN=CDCP1 PE=1 SV=3	CUB domain-containing protein 1	2	2	2	1	2	2	2	0	2	0	2	0	2	3.1	3.1	3.1	92.931	836	836	0.00077399	13.545		By MS/MS	0	3.1	1730900	0	1730900	0	1730900	0	2	2				2446	13446;20390	True;True	14453;22215	36326;56157	36371;56523	36371;56523
P55287	CDH11	Cadherin-11 OS=Homo sapiens GN=CDH11 PE=1 SV=2	Cadherin-11	4	4	4	1	4	4	4	0	4	0	4	0	4	8	8	8	87.964	796	796	0	26.649		By MS/MS	0	8	5654400	0	5654400	0	5654400	0	4	4				1231	1869;4319;10473;12356	True;True;True;True	2026;4670;11271;13281	5122;11598;28021;33265;33266	5037;11409;27942;33437	5037;11409;27942;33437
P55290	CDH13	Cadherin-13 OS=Homo sapiens GN=CDH13 PE=1 SV=1	Cadherin-13	5	5	5	1	5	5	5	1	5	1	5	1	5	10.8	10.8	10.8	78.286	713	713	0	54.194	By matching	By MS/MS	2.4	10.8	62278000	61136	62217000	0	62217000	0	6	6				1232	3502;10365;14611;17623;19213	True;True;True;True;True	3775;11155;15942;19239;20945	9432;27720;40042;40043;48371;48372;48373;52851	9211;27664;40256;48597;48598;53146	9211;27664;40256;48598;53146
O14735	CDIPT	CDP-diacylglycerol--inositol 3-phosphatidyltransferase OS=Homo sapiens GN=CDIPT PE=1 SV=1	CDP-diacylglycerol--inositol 3-phosphatidyltransferase	2	2	2	1	2	2	2	1	2	1	2	1	2	9.9	9.9	9.9	23.539	213	213	0.00078125	13.785	By matching	By MS/MS	5.2	9.9	15100000	77759	15022000	0	12535000	0	5	5				111	14335;15288	True;True	15527;15528;16702	38982;38983;38984;38985;38986;38987;38988;41982	39070;39071;39072;39073;42273	39073;42273	73;74	122;201
P06493	CDK1	Cyclin-dependent kinase 1 OS=Homo sapiens GN=CDK1 PE=1 SV=3	Cyclin-dependent kinase 1	7;1;1;1;1;1;1;1;1;1	7;1;1;1;1;1;1;1;1;1	6;0;0;0;0;0;0;0;0;0	10	7	7	6	4	5	4	5	3	4	33.3	33.3	30.6	34.095	297	297;326;372;435;469;472;496;523;1490;1512	0	60.429	By MS/MS	By MS/MS	15.2	24.9	18113000	640090	17473000	0	16054000	5	6	11				464	1344;11299;11464;11980;15157;17973;22824	True;True;True;True;True;True;True	1460;12154;12330;12878;16565;19620;24849	3717;30293;30689;30690;30691;30692;30693;30694;30695;32171;41558;41559;49278;49279;63099	3591;30186;30550;30551;30552;32166;41740;41741;49433;49434;63368	3591;30186;30551;32166;41741;49433;63368
P11802	CDK4	Cyclin-dependent kinase 4 OS=Homo sapiens GN=CDK4 PE=1 SV=2	Cyclin-dependent kinase 4	3	2	2	1	3	2	2	1	3	0	2	0	2	13.5	10.9	10.9	33.729	303	303	0.00043328	18.458	By matching	By MS/MS	2.6	13.5	10581000	0	10581000	0	10581000	0	5	5				590	3699;11464;22327	True;False;True	3980;12330;24320	9919;9920;30689;30690;30691;30692;30693;30694;30695;61670;61671	9645;9646;30550;30551;30552;61825;61826;61827	9645;30551;61825
Q00535	CDK5	Cyclin-dependent-like kinase 5 OS=Homo sapiens GN=CDK5 PE=1 SV=3	Cyclin-dependent-like kinase 5	5	4	4	1	5	4	4	1	5	0	4	0	4	20.5	17.8	17.8	33.304	292	292	0	31.323	By matching	By MS/MS	2.7	20.5	12444000	0	12444000	0	12444000	0	5	5				1432	3727;9883;10572;11464;12690	True;True;True;False;True	4009;10629;11374;12330;13635	9977;9978;26352;28270;30689;30690;30691;30692;30693;30694;30695;34171;34172	9695;26336;28179;30550;30551;30552;34244;34245	9695;26336;28179;30551;34245
Q96JB5	CDK5RAP3	CDK5 regulatory subunit-associated protein 3 OS=Homo sapiens GN=CDK5RAP3 PE=1 SV=2	CDK5 regulatory subunit-associated protein 3	3	3	3	1	3	3	3	0	3	0	3	0	3	7.7	7.7	7.7	56.92	506	506	0	20.25		By MS/MS	0	7.7	5122300	0	5122300	0	5122300	0	3	3				2235	2712;14152;16505	True;True;True	2925;15269;18033	7405;38455;38456;45415	7286;38541;45645	7286;38541;45645
P42771	CDKN2A	Cyclin-dependent kinase inhibitor 2A, isoforms 1/2/3 OS=Homo sapiens GN=CDKN2A PE=1 SV=2	Cyclin-dependent kinase inhibitor 2A	4;1	4;1	4;1	2	4	4	4	0	4	0	4	0	4	46.8	46.8	46.8	16.532	156	156;138	0	25.513		By MS/MS	0	46.8	17327000	0	17327000	0	17327000	0	5	5				1030	1388;9546;14213;19946	True;True;True;True	1504;10280;15357;21734	3824;3825;25387;38687;54881;54882	3689;3690;25232;38798;55287	3689;25232;38798;55287
P42773	CDKN2C	Cyclin-dependent kinase 4 inhibitor C OS=Homo sapiens GN=CDKN2C PE=1 SV=1	Cyclin-dependent kinase 4 inhibitor C	2	2	2	1	2	2	2	0	2	0	2	0	2	22.6	22.6	22.6	18.127	168	168	0.00076953	13.404		By MS/MS	0	22.6	4804200	0	4804200	0	4804200	0	1	1				1031	661;7592	True;True	720;8188	1850;20186	1852;19849	1852;19849
Q9UKY7	CDV3	Protein CDV3 homolog OS=Homo sapiens GN=CDV3 PE=1 SV=1	Protein CDV3 homolog	2	2	2	1	2	2	2	0	2	0	2	0	2	24.8	24.8	24.8	27.335	258	258	0.00042863	17.96		By MS/MS	0	24.8	3857500	0	3857500	0	3857500	0	3	3				2688	238;2409	True;True	261;2604	677;6551	705;706;6411	705;6411
Q8WUJ3	CEMIP	Cell migration-inducing and hyaluronan-binding protein OS=Homo sapiens GN=CEMIP PE=1 SV=2	Cell migration-inducing and hyaluronan-binding protein	15	15	15	1	15	15	15	0	15	0	15	0	15	14.8	14.8	14.8	153	1361	1361	0	115.51		By MS/MS	0	14.8	259940000	0	259940000	0	259940000	0	19	19				2098	142;390;2417;4498;7889;9829;11432;13843;14766;14846;18327;19630;20358;20548;22808	True;True;True;True;True;True;True;True;True;True;True;True;True;True;True	152;428;2612;4856;8506;10572;12297;14876;16145;16235;19992;21396;22181;22385;24832	385;386;1134;6570;12012;12013;21020;21021;26206;26207;26208;30600;37492;40558;40559;40794;40795;40796;50177;50178;50179;54045;54046;56069;56630;63063	425;1177;6430;11800;20740;26186;30482;37577;40759;40760;40989;40990;50301;50302;54377;54378;56431;56981;63338	425;1177;6430;11800;20740;26186;30482;37577;40760;40990;50301;54378;56431;56981;63338
P23528	CFL1	Cofilin-1 OS=Homo sapiens GN=CFL1 PE=1 SV=3	Cofilin-1	14	14	12	1	14	14	12	6	13	6	13	5	11	75.3	75.3	58.4	18.502	166	166	0	262.55	By MS/MS	By MS/MS	41.6	75.3	3642700000	7300200	3635400000	22316000	3563100000	11	67	78				814	1945;1946;1947;2333;2334;5409;9035;9036;11082;11351;12189;12190;15090;22198	True;True;True;True;True;True;True;True;True;True;True;True;True;True	2106;2107;2108;2524;2525;5839;9732;9733;11929;12210;13105;13106;16491;24179	5325;5326;5327;5328;5329;5330;5331;5332;5333;6365;6366;6367;14350;14351;14352;14353;14354;14355;14356;14357;14358;14359;14360;24144;24145;24146;24147;24148;24149;24150;24151;24152;29757;29758;29759;29760;29761;29762;30410;30411;32866;32867;32868;32869;32870;32871;41382;41383;41384;41385;41386;41387;41388;41389;41390;41391;41392;41393;61322;61323;61324;61325;61326;61327	5248;5249;5250;5251;5252;5253;5254;5255;5256;5257;5258;5259;5260;5261;5262;5263;5264;5265;5266;5267;6236;6237;6238;14070;14071;14072;14073;14074;14075;14076;14077;14078;14079;23776;23777;23778;23779;23780;23781;23782;23783;23784;23785;23786;23787;29717;29718;29719;29720;29721;30301;33075;33076;33077;33078;33079;41566;41567;41568;41569;41570;41571;41572;41573;41574;41575;41576;41577;41578;41579;41…	5252;5265;5266;6236;6237;14075;23779;23784;29720;30301;33075;33079;41566;61483
Q9Y281	CFL2	Cofilin-2 OS=Homo sapiens GN=CFL2 PE=1 SV=1	Cofilin-2	7	5	5	1	7	5	5	3	7	2	5	2	5	56.6	39.8	39.8	18.736	166	166	0	57.193	By MS/MS	By MS/MS	27.1	56.6	140140000	237460	139900000	1304000	138580000	3	9	12				2735	1950;9054;11082;12187;16247;16252;22198	True;True;False;True;True;True;False	2111;9754;11929;13103;17756;17761;24179	5342;5343;24196;29757;29758;29759;29760;29761;29762;32861;32862;32863;44694;44695;44710;44711;44712;44713;44714;44715;61322;61323;61324;61325;61326;61327	5276;5277;5278;23840;29717;29718;29719;29720;29721;33072;33073;45014;45015;45025;45026;45027;45028;61481;61482;61483;61484	5277;23840;29720;33073;45014;45027;61483
Q9NX63	CHCHD3	MICOS complex subunit MIC19 OS=Homo sapiens GN=CHCHD3 PE=1 SV=1	MICOS complex subunit MIC19	4	4	4	1	4	4	4	0	4	0	4	0	4	20.7	20.7	20.7	26.152	227	227	0	34.123		By MS/MS	0	20.7	43793000	0	43793000	0	43793000	0	7	7				2561	13387;19938;22333;22784	True;True;True;True	14394;21726;24326;24807	36157;54863;54864;61683;61684;61685;61686;61687;63010;63011	36227;55271;55272;61838;61839;61840;63280;63281	36227;55272;61838;63280
Q9BWS9	CHID1	Chitinase domain-containing protein 1 OS=Homo sapiens GN=CHID1 PE=1 SV=1	Chitinase domain-containing protein 1	6	6	6	1	6	6	6	0	6	0	6	0	6	22.9	22.9	22.9	44.94	393	393	0	53.591		By MS/MS	0	22.9	28688000	0	28688000	0	28688000	0	8	8				2365	686;5112;7239;9379;15638;18057	True;True;True;True;True;True	745;5518;7808;10104;17094;19709	1900;1901;13568;19262;19263;24943;43018;49497	1912;13350;13351;13352;18964;24775;43397;49643	1912;13351;18964;24775;43397;49643
Q9HD42	CHMP1A	Charged multivesicular body protein 1a OS=Homo sapiens GN=CHMP1A PE=1 SV=1	Charged multivesicular body protein 1a	3	3	3	1	3	3	3	0	3	0	3	0	3	13.3	13.3	13.3	21.703	196	196	0	19.431		By MS/MS	0	13.3	17787000	0	17787000	0	15091000	0	5	5				2488	1491;14071;21915	True;True;True	1614;15139;15140;23882	4120;38166;38167;38168;60617;60618;60619	3977;38254;38255;38256;60774	3977;38256;60774	2174	1
Q7LBR1	CHMP1B	Charged multivesicular body protein 1b OS=Homo sapiens GN=CHMP1B PE=1 SV=1	Charged multivesicular body protein 1b	2	2	2	1	2	2	2	0	2	0	2	0	2	10.1	10.1	10.1	22.109	199	199	0.0021337	11.126		By MS/MS	0	10.1	2974200	0	2974200	0	2974200	0	2	2				1943	14592;15424	True;True	15914;16865	39970;42473;42474	40197;42828	40197;42828	1977;1978	1;4
O43633	CHMP2A	Charged multivesicular body protein 2a OS=Homo sapiens GN=CHMP2A PE=1 SV=1	Charged multivesicular body protein 2a	2	2	2	1	2	2	2	1	2	1	2	1	2	12.2	12.2	12.2	25.104	222	222	0.00077973	13.769	By MS/MS	By MS/MS	8.1	12.2	4370200	13938	4356300	0	4356300	1	3	4				203	518;1628	True;True	571;1773	1463;1464;1465;4491	1477;1478;4335;4336	1478;4336
Q9Y3E7	CHMP3	Charged multivesicular body protein 3 OS=Homo sapiens GN=CHMP3 PE=1 SV=3	Charged multivesicular body protein 3	2	2	2	1	2	2	2	0	2	0	2	0	2	8.1	8.1	8.1	25.073	222	222	0.00072807	11.91		By MS/MS	0	8.1	3180600	0	3180600	0	3180600	0	2	2				2771	1023;15446	True;True	1112;16887	2821;42517;42518	2789;42873	2789;42873
Q9H444	CHMP4B	Charged multivesicular body protein 4b OS=Homo sapiens GN=CHMP4B PE=1 SV=1	Charged multivesicular body protein 4b	2	2	2	1	2	2	2	1	2	1	2	1	2	10.7	10.7	10.7	24.95	224	224	0	20.915	By matching	By MS/MS	4.5	10.7	17430000	111770	17319000	0	17319000	0	3	3				2434	4729;11200	True;True	5102;12051	12622;30054;30055;30056	12405;29977;29978	12405;29978
Q96FZ7	CHMP6	Charged multivesicular body protein 6 OS=Homo sapiens GN=CHMP6 PE=1 SV=3	Charged multivesicular body protein 6	4	4	4	1	4	4	4	2	4	2	4	2	4	27.9	27.9	27.9	23.485	201	201	0	37.561	By MS/MS	By MS/MS	10.4	27.9	18869000	215900	18653000	274440	18594000	2	11	13				2215	10150;14325;18872;22728	True;True;True;True	10909;15514;20578;24749	27109;27110;27111;27112;27113;38962;51862;62841;62842;62843;62844;62845	27040;27041;27042;27043;27044;27045;39051;39052;52114;52115;52116;63126;63127	27043;39052;52114;63126	2059	114
P15882	CHN1	N-chimaerin OS=Homo sapiens GN=CHN1 PE=1 SV=3	N-chimaerin	2	2	2	1	2	2	2	0	2	0	2	0	2	4.6	4.6	4.6	53.172	459	459	0.00072833	11.923		By MS/MS	0	4.6	2514600	0	2514600	0	2514600	0	2	2				656	110;3757	True;True	119;4046	304;10064	339;9772	339;9772
Q9UHD1	CHORDC1	Cysteine and histidine-rich domain-containing protein 1 OS=Homo sapiens GN=CHORDC1 PE=1 SV=2	Cysteine and histidine-rich domain-containing protein 1	3	3	3	1	3	3	3	0	3	0	3	0	3	9	9	9	37.489	332	332	0	26.117		By MS/MS	0	9	3938100	0	3938100	0	3938100	0	3	3				2648	1382;13915;19554	True;True;True	1498;14955;21316	3816;37728;53863;53864	3682;37826;54200	3682;37826;54200
Q99653	CHP1	Calcineurin B homologous protein 1 OS=Homo sapiens GN=CHP1 PE=1 SV=3	Calcineurin B homologous protein 1	10	10	10	1	10	10	10	2	9	2	9	2	9	60.5	60.5	60.5	22.456	195	195	0	75.252	By MS/MS	By MS/MS	10.8	54.4	55643000	121350	55521000	0	55521000	1	13	14				2296	2029;3091;4455;6215;10056;10426;10676;13935;19130;19185	True;True;True;True;True;True;True;True;True;True	2192;3329;4811;6707;10811;11220;11493;14975;20857;20915	5515;8356;8357;11905;16433;16434;26839;27891;27892;28579;37766;37767;37768;52638;52639;52640;52778	5427;8221;8222;11682;16117;26770;27820;28528;37868;37869;52958;52959;52960;53079	5427;8221;11682;16117;26770;27820;28528;37869;52958;53079
O76071	CIAO1	Probable cytosolic iron-sulfur protein assembly protein CIAO1 OS=Homo sapiens GN=CIAO1 PE=1 SV=1	Probable cytosolic iron-sulfur protein assembly protein CIAO1	2	2	2	1	2	2	2	0	2	0	2	0	2	10.9	10.9	10.9	37.84	339	339	0.00041254	15.999		By MS/MS	0	10.9	2670100	0	2670100	0	2670100	0	2	2				319	9383;18409	True;True	10109;20079	24978;50433	24812;50551	24812;50551
Q8N5K1	CISD2	CDGSH iron-sulfur domain-containing protein 2 OS=Homo sapiens GN=CISD2 PE=1 SV=1	CDGSH iron-sulfur domain-containing protein 2	2	2	2	1	2	2	2	0	2	0	2	0	2	21.5	21.5	21.5	15.278	135	135	0	22.675		By MS/MS	0	21.5	4638700	0	4638700	0	4638700	0	2	2				2030	9226;21832	True;True	9939;23793	24574;60399	24339;60574	24339;60574
Q07065	CKAP4	Cytoskeleton-associated protein 4 OS=Homo sapiens GN=CKAP4 PE=1 SV=2	Cytoskeleton-associated protein 4	34;1	34;1	34;1	2	34	34	34	24	34	24	34	24	34	60.5	60.5	60.5	66.022	602	602;471	0	323.31	By MS/MS	By MS/MS	44.2	60.5	2001300000	7563300	1993800000	10081000	1954700000	30	98	128				1497	2042;3209;3782;5030;5767;6065;6467;7912;8224;9287;9758;10606;11451;11531;11900;13103;13221;13251;16549;16607;16840;17587;17735;17736;18126;18244;18260;18357;18435;18682;20033;20034;21365;21414	True;True;True;True;True;True;True;True;True;True;True;True;True;True;True;True;True;True;True;True;True;True;True;True;True;True;True;True;True;True;True;True;True;True	2206;3461;4073;5427;6214;6544;6980;8531;8860;10004;10498;11411;12317;12398;12794;14088;14215;14216;14250;18080;18143;18395;19199;19359;19360;19781;19908;19925;20024;20025;20105;20374;21832;21833;23287;23340	5549;5550;5551;5552;5553;5554;8650;8651;8652;10121;10122;10123;13378;15264;16040;16041;16042;16043;17068;17069;17070;21077;21928;21929;21930;21931;24716;24717;24718;24719;24720;25911;25912;25913;25914;25915;25916;28345;28346;28347;28348;30650;30651;30652;30653;30884;30885;30886;30887;30888;31986;31987;31988;31989;31990;31991;31992;31993;31994;31995;31996;31997;35378;35379;35380;35660;35661;35662;…	5467;5468;5469;5470;5471;5472;8473;8474;8475;8476;9820;9821;9822;13161;14958;15720;15721;15722;16712;20787;21600;21601;24481;24482;24483;24484;25739;25740;25741;25742;25743;25744;28243;30516;30517;30518;30778;30779;31983;31984;31985;31986;31987;31988;31989;31990;31991;31992;31993;35451;35717;35718;35719;35720;35721;35722;35723;35724;35725;35808;35809;45733;45734;45735;45736;45737;45738;45851;4585…	5470;8476;9821;13161;14958;15722;16712;20787;21600;24484;25743;28243;30516;30779;31983;35451;35725;35809;45738;45852;46461;48423;48831;48833;49816;50086;50113;50376;50606;51509;55608;55612;59172;59276	1705;1706	317;423
Q14008	CKAP5	Cytoskeleton-associated protein 5 OS=Homo sapiens GN=CKAP5 PE=1 SV=3	Cytoskeleton-associated protein 5	10	10	10	1	10	10	10	1	10	1	10	1	10	6.6	6.6	6.6	225.49	2032	2032	0	148.84	By matching	By MS/MS	0.5	6.6	28159000	470790	27689000	0	27689000	0	11	11				1623	46;2782;4731;5444;9140;11675;14736;19547;19661;22766	True;True;True;True;True;True;True;True;True;True	49;3001;5104;5876;9845;12558;16113;21309;21428;24789	133;134;7577;12627;12628;14481;24340;24341;24342;31451;40471;53848;54108;62952;62953	145;7438;12409;12410;14248;24019;31500;40676;54189;54440;63234	145;7438;12410;14248;24019;31500;40676;54189;54440;63234
P12277	CKB	Creatine kinase B-type OS=Homo sapiens GN=CKB PE=1 SV=1	Creatine kinase B-type	11	11	11	1	11	11	11	2	10	2	10	2	10	51.4	51.4	51.4	42.644	381	381	0	124.56	By MS/MS	By MS/MS	7.6	45.9	206860000	1244800	205610000	0	198600000	1	25	26				600	3656;4548;6583;8666;9094;11967;12174;12701;13327;17889;18763	True;True;True;True;True;True;True;True;True;True;True	3935;4909;7098;9342;9796;12863;12864;13088;13089;13646;14331;19527;20459	9819;9820;9821;12130;17364;23082;23083;23084;23085;24258;32135;32136;32137;32837;32838;32839;32840;34193;34194;34195;36001;49054;51551	9556;9557;9558;11914;11915;16993;16994;22650;22651;22652;22653;22654;23918;32133;32134;32135;32136;33051;33052;33053;33054;34263;36056;49208;49209;51726	9556;11915;16993;22653;23918;32135;33054;34263;36056;49209;51726	549;550;551	30;352;377
P33552	CKS2	Cyclin-dependent kinases regulatory subunit 2 OS=Homo sapiens GN=CKS2 PE=1 SV=1	Cyclin-dependent kinases regulatory subunit 2	2	2	2	1	2	2	2	1	2	1	2	1	2	24.1	24.1	24.1	9.8602	79	79	0.00072333	11.716	By matching	By MS/MS	11.4	24.1	3594400	13221	3581100	0	3581100	0	3	3				937	19052;22345	True;True	20771;24338	52408;61718;61719;61720;61721	52705;61869;61870	52705;61870	1064	38
O75122	CLASP2	CLIP-associating protein 2 OS=Homo sapiens GN=CLASP2 PE=1 SV=2	CLIP-associating protein 2	3	3	3	1	3	3	3	0	3	0	3	0	3	2.6	2.6	2.6	141.13	1294	1294	0	19.401		By MS/MS	0	2.6	2180100	0	2180100	0	2180100	0	3	3				269	5206;7251;12588	True;True;True	5618;7820;13525	13795;13796;19285;33876	13565;18988;33990	13565;18988;33990
Q96S66	CLCC1	Chloride channel CLIC-like protein 1 OS=Homo sapiens GN=CLCC1 PE=1 SV=1	Chloride channel CLIC-like protein 1	3	3	3	1	3	3	3	1	3	1	3	1	3	5.6	5.6	5.6	62.022	551	551	0	24.35	By matching	By MS/MS	1.3	5.6	103720000	314770	103410000	0	103410000	0	3	3				2273	4958;11497;11773	True;True;True	5349;12363;12662	13182;13183;30780;31689;31690;31691	12956;30670;31721	12956;30670;31721
P51798	CLCN7	H(+)/Cl(-) exchange transporter 7 OS=Homo sapiens GN=CLCN7 PE=1 SV=2	H(+)/Cl(-) exchange transporter 7	5	5	5	1	5	5	5	0	5	0	5	0	5	8.9	8.9	8.9	88.678	805	805	0	84.631		By MS/MS	0	8.9	10836000	0	10836000	0	10836000	0	6	6				1165	6403;17920;18078;20536;22334	True;True;True;True;True	6910;19562;19730;22373;24327	16906;16907;49137;49138;49562;56584;61688	16580;49301;49712;56918;56919;61841	16580;49301;49712;56918;61841
O00299	CLIC1	Chloride intracellular channel protein 1 OS=Homo sapiens GN=CLIC1 PE=1 SV=4	Chloride intracellular channel protein 1	13	13	13	1	13	13	13	9	13	9	13	9	13	70.1	70.1	70.1	26.922	241	241	0	185.99	By MS/MS	By MS/MS	55.6	70.1	1317400000	4673300	1312800000	6277100	1310900000	13	48	61				77	567;4995;6884;7855;8849;9676;9920;11130;11449;12340;15519;20868;22612	True;True;True;True;True;True;True;True;True;True;True;True;True	624;5387;7417;8467;9536;10415;10668;11979;12315;13264;16965;22741;24619	1612;1613;1614;1615;1616;13276;13277;13278;13279;13280;18235;18236;18237;18238;18239;18240;20922;20923;20924;20925;23613;23614;23615;23616;23617;23618;25730;25731;26452;26453;26454;26455;29868;29869;29870;29871;30638;30639;30640;30641;30642;30643;30644;30645;30646;30647;33233;42693;42694;42695;42696;57607;57608;57609;57610;57611;57612;57613;57614;57615;57616;62361;62362;62363;62364;62365	1627;1628;1629;1630;13057;13058;13059;13060;17926;17927;17928;17929;17930;17931;17932;17933;20647;23210;23211;23212;23213;23214;23215;25556;25557;26426;26427;26428;29807;29808;29809;29810;30506;30507;30508;30509;30510;30511;30512;30513;33406;43042;43043;43044;43045;57871;57872;57873;57874;57875;57876;57877;57878;57879;57880;57881;57882;62487;62488;62489;62490	1630;13060;17927;20647;23214;25557;26428;29810;30509;33406;43043;57874;62490
Q9Y696	CLIC4	Chloride intracellular channel protein 4 OS=Homo sapiens GN=CLIC4 PE=1 SV=4	Chloride intracellular channel protein 4	16	16	16	1	16	16	16	4	16	4	16	4	16	74.7	74.7	74.7	28.772	253	253	0	233.8	By MS/MS	By MS/MS	17.8	74.7	1305200000	533340	1304700000	820890	1203600000	1	55	56				2822	947;1486;1487;3070;3071;6334;6885;8858;9243;9677;11131;11291;11693;15523;18796;22620	True;True;True;True;True;True;True;True;True;True;True;True;True;True;True;True	1027;1607;1608;1609;1610;3306;3307;6833;7418;7419;9545;9956;9957;10416;11980;12145;12577;12578;16969;20497;24627	2614;2615;2616;4106;4107;4108;4109;4110;4111;4112;8299;8300;8301;8302;8303;8304;8305;8306;8307;16758;16759;18241;18242;18243;18244;18245;18246;18247;23645;23646;24601;24602;24603;24604;25732;29872;29873;29874;30271;30272;31481;31482;31483;31484;31485;31486;31487;31488;31489;31490;42704;42705;42706;42707;42708;42709;42710;51678;51679;51680;62385;62386;62387;62388	2572;2573;3967;3968;3969;3970;3971;3972;8167;8168;8169;8170;8171;8172;8173;8174;8175;8176;16456;17934;17935;17936;17937;17938;17939;17940;17941;17942;23240;24368;24369;24370;25558;29811;29812;29813;29814;30161;30162;31529;31530;31531;31532;31533;31534;31535;31536;31537;31538;43051;43052;43053;51908;51909;51910;62508	2572;3969;3970;8169;8173;16456;17941;23240;24368;25558;29813;30162;31538;43053;51910;62508	2329;2330;2331;2332	5;119;168;184
Q14677	CLINT1	Clathrin interactor 1 OS=Homo sapiens GN=CLINT1 PE=1 SV=1	Clathrin interactor 1	3	3	3	1	3	3	3	0	3	0	3	0	3	6.1	6.1	6.1	68.259	625	625	0	19.717		By MS/MS	0	6.1	4615000	0	4615000	0	4129300	0	4	4				1661	2159;7697;9942	True;True;True	2331;2332;8297;10692	5866;5867;20533;26522	5766;5767;20306;26485	5767;20306;26485	1840	19
Q16740	CLPP	ATP-dependent Clp protease proteolytic subunit, mitochondrial OS=Homo sapiens GN=CLPP PE=1 SV=1	ATP-dependent Clp protease proteolytic subunit, mitochondrial	4	4	4	1	4	4	4	0	4	0	4	0	4	22	22	22	30.18	277	277	0	30.161		By MS/MS	0	22	22327000	0	22327000	0	20124000	0	9	9				1771	5957;8437;16579;21097	True;True;True;True	6429;9095;9096;18113;22982	15772;22500;22501;22502;45598;45599;58230	15466;22119;22120;22121;22122;45808;45809;45810;58436	15466;22122;45808;58436	1925	199
O96005	CLPTM1	Cleft lip and palate transmembrane protein 1 OS=Homo sapiens GN=CLPTM1 PE=1 SV=1	Cleft lip and palate transmembrane protein 1	4	4	4	1	4	4	4	0	4	0	4	0	4	8.5	8.5	8.5	76.096	669	669	0	55.475		By MS/MS	0	8.5	9191500	0	9191500	0	9191500	0	5	5				389	55;15217;17016;22110	True;True;True;True	62;16628;18578;24088	157;41710;46806;61135	171;41888;41889;47015;61314	171;41888;47015;61314	215	222
P09496	CLTA	Clathrin light chain A OS=Homo sapiens GN=CLTA PE=1 SV=1	Clathrin light chain A	5	5	5	1	5	5	5	2	5	2	5	2	5	16.5	16.5	16.5	27.076	248	248	0	28.723	By MS/MS	By MS/MS	7.3	16.5	93755000	473740	93282000	1341100	92414000	2	6	8				535	5579;11624;11817;13293;22114	True;True;True;True;True	6017;12501;12709;14297;24092	14814;14815;14816;31195;31196;31197;31793;31794;31795;35894;35895;35896;61143	14549;14550;31051;31814;31815;35931;35932;61320	14549;31051;31815;35932;61320
P09497	CLTB	Clathrin light chain B OS=Homo sapiens GN=CLTB PE=1 SV=1	Clathrin light chain B	4	4	4	1	4	4	4	1	4	1	4	1	4	16.2	16.2	16.2	25.19	229	229	0	26.341	By MS/MS	By MS/MS	4.4	16.2	24290000	34312	24256000	0	24256000	1	5	6				536	3637;5081;13187;20023	True;True;True;True	3916;5485;14179;21822	9773;9774;13486;13487;35586;55135;55136;55137	9518;9519;13274;35652;55560;55561	9519;13274;35652;55561
Q00610	CLTC	Clathrin heavy chain 1 OS=Homo sapiens GN=CLTC PE=1 SV=5	Clathrin heavy chain 1	87	87	68	1	87	87	68	31	87	31	87	22	68	64.1	64.1	54.1	191.61	1675	1675	0	323.31	By MS/MS	By MS/MS	23.2	64.1	8111800000	10398000	8101400000	23008000	7401100000	38	305	343				1434	381;772;1011;1022;1038;1294;1295;1582;1788;2249;2476;2675;2875;3997;4007;4289;4290;4705;4835;4905;5321;5505;5883;6124;6176;6308;6640;6990;7057;7097;8438;8452;8453;8509;8909;9018;9306;9418;9962;10614;10879;10974;11042;11069;11124;11132;11399;11488;11580;11669;11753;11835;11922;12336;12530;12641;12764;12882;13130;14185;15198;15248;15337;15355;15808;15889;16596;16791;16864;18420;18465;19283;19581;20…	True;True;True;True;True;True;True;True;True;True;True;True;True;True;True;True;True;True;True;True;True;True;True;True;True;True;True;True;True;True;True;True;True;True;True;True;True;True;True;True;True;True;True;True;True;True;True;True;True;True;True;True;True;True;True;True;True;True;True;True;True;True;True;True;True;True;True;True;True;True;True;True;True;True;True;True;True;True;True;True…	417;418;836;837;1096;1109;1110;1111;1129;1130;1408;1409;1722;1939;2432;2433;2673;2883;3098;3099;4322;4333;4639;4640;5077;5218;5294;5747;5939;6353;6608;6666;6804;7161;7542;7612;7613;7659;9097;9112;9113;9174;9597;9715;10025;10144;10714;11419;11707;11808;11886;11916;11973;11981;12262;12354;12450;12552;12642;12727;12817;13260;13467;13584;13585;13586;13715;13838;14116;15318;16607;16661;16772;16790;172…	1110;1111;1112;1113;1114;1115;1116;1117;2130;2131;2132;2133;2134;2135;2136;2137;2138;2139;2791;2817;2818;2819;2820;2861;2862;2863;2864;2865;2866;3585;3586;3587;3588;3589;3590;3591;4393;4394;4901;4902;4903;6131;6132;6133;6134;6135;6136;6137;6138;6139;6140;6736;6737;6738;6739;6740;7231;7232;7233;7234;7235;7830;7831;7832;7833;7834;7835;7836;7837;10779;10780;10781;10794;10795;10796;10797;10798;11529;…	1150;1151;1152;1153;1154;1155;1156;1157;2116;2117;2118;2119;2120;2121;2122;2123;2124;2125;2753;2785;2786;2787;2788;2825;2826;2827;2828;2829;2830;3476;3477;3478;3479;3480;3481;3482;3483;4251;4252;4803;4804;4805;4806;6023;6024;6025;6026;6027;6028;6029;6030;6031;6032;6033;6570;6571;6572;7076;7077;7078;7079;7670;7671;7672;7673;7674;7675;7676;10547;10561;10562;10563;11344;11345;11346;11347;11348;11349…	1152;2125;2753;2786;2830;3478;3483;4252;4804;6030;6570;7079;7675;10547;10561;11344;11352;12336;12700;12846;13868;14390;15269;15855;16035;16358;17159;18210;18383;18533;22125;22151;22153;22280;23363;23739;24513;24895;26521;28262;29051;29396;29594;29694;29800;29816;30420;30649;30912;31489;31676;31851;32045;33400;33850;34143;34443;34829;35512;38642;41840;41968;42618;42650;43813;44098;45833;46357;4651…	1639;1640;1641;1642;1643;1644;1645;1646;1647;1648;1649;1650;1651;1652;1653;1654;1655;1656	32;95;104;132;181;206;264;295;587;590;604;996;1041;1138;1302;1314;1316;1538
P10909	CLU	Clusterin OS=Homo sapiens GN=CLU PE=1 SV=1	Clusterin;Clusterin beta chain;Clusterin alpha chain	6	6	6	1	6	6	6	0	6	0	6	0	6	19.8	19.8	19.8	52.494	449	449	0	55.701		By MS/MS	0	19.8	47437000	0	47437000	0	47437000	0	10	10				571	2016;5407;5424;5545;12025;21695	True;True;True;True;True;True	2179;5837;5854;5982;12925;23640	5486;5487;14347;14390;14741;32277;32278;59997;59998;59999;60000	5404;5405;14068;14106;14473;32267;60197;60198;60199;60200	5404;14068;14106;14473;32267;60197
Q96DG6	CMBL	Carboxymethylenebutenolidase homolog OS=Homo sapiens GN=CMBL PE=1 SV=1	Carboxymethylenebutenolidase homolog	3	3	3	1	3	3	3	0	3	0	3	0	3	16.3	16.3	16.3	28.048	245	245	0	21.431		By MS/MS	0	16.3	6798900	0	6798900	0	6798900	0	4	4				2199	1611;2316;4158	True;True;True	1756;2507;4496	4457;6328;6329;11187	4309;6208;6209;10974	4309;6208;10974
P30085	CMPK1	UMP-CMP kinase OS=Homo sapiens GN=CMPK1 PE=1 SV=3	UMP-CMP kinase	9	9	9	1	9	9	9	1	9	1	9	1	9	53.6	53.6	53.6	22.222	196	196	0	103.65	By matching	By MS/MS	6.6	53.6	132390000	47676	132350000	0	132350000	0	17	17				893	5785;6912;10549;10900;11284;15428;18415;18416;22457	True;True;True;True;True;True;True;True;True	6234;6235;7447;11349;11729;12138;16869;20085;20086;24454	15311;15312;18319;18320;28204;28205;28206;29177;29178;29179;30257;30258;30259;42481;42482;50446;50447;50448;50449;61978	15007;15008;18005;18006;28112;28113;29121;29122;30149;30150;42834;42835;50561;50562;50563;50564;50565;62104	15008;18006;28112;29121;30149;42835;50561;50564;62104	1021	76
Q5EBM0	CMPK2	UMP-CMP kinase 2, mitochondrial OS=Homo sapiens GN=CMPK2 PE=1 SV=3	UMP-CMP kinase 2, mitochondrial	5	5	5	1	5	5	5	0	5	0	5	0	5	19.2	19.2	19.2	49.447	449	449	0	40.761		By MS/MS	0	19.2	13044000	0	13044000	0	13044000	0	6	6				1820	2328;2329;13311;18574;19721	True;True;True;True;True	2519;2520;14315;20252;21493	6358;6359;6360;35943;50903;54297;54298	6230;6231;35970;51025;54637;54638	6230;6231;35970;51025;54638
Q9NX76	CMTM6	CKLF-like MARVEL transmembrane domain-containing protein 6 OS=Homo sapiens GN=CMTM6 PE=1 SV=1	CKLF-like MARVEL transmembrane domain-containing protein 6	2	2	2	1	2	2	2	0	2	0	2	0	2	15.8	15.8	15.8	20.419	183	183	0.00041824	16.749		By MS/MS	0	15.8	21067000	0	21067000	0	21067000	0	3	3				2562	532;14208	True;True	585;15351	1509;38637;38638	1524;38734;38735	1524;38734	2201	1
Q96KP4	CNDP2	Cytosolic non-specific dipeptidase OS=Homo sapiens GN=CNDP2 PE=1 SV=2	Cytosolic non-specific dipeptidase	14	14	14	1	14	14	14	2	14	2	14	2	14	44.4	44.4	44.4	52.878	475	475	0	143.04	By MS/MS	By MS/MS	7.2	44.4	213880000	52696	213830000	73148	213810000	1	30	31				2245	186;3684;4396;4418;5215;8358;13052;13827;13931;15649;16297;16350;19777;22145	True;True;True;True;True;True;True;True;True;True;True;True;True;True	201;3963;4750;4772;5629;9008;14033;14859;14971;17107;17806;17862;21551;24125	512;513;9883;11780;11781;11822;13827;13828;22271;22272;22273;22274;35237;37432;37433;37758;37759;37760;37761;43046;43047;43048;43049;43050;43051;44859;44860;44861;45009;45010;54440;61210;61211	530;531;9613;11574;11575;11606;13599;13600;21895;21896;21897;21898;35297;37520;37521;37522;37523;37861;37862;37863;43420;43421;43422;45168;45169;45170;45298;54796;61378;61379;61380	531;9613;11575;11606;13599;21896;35297;37522;37863;43421;45168;45298;54796;61379
P51911	CNN1	Calponin-1 OS=Homo sapiens GN=CNN1 PE=1 SV=2	Calponin-1	3	3	3	1	3	3	3	0	3	0	3	0	3	16.8	16.8	16.8	33.17	297	297	0	19.499		By MS/MS	0	16.8	19423000	0	19423000	0	19423000	0	4	4				1171	3288;10367;12280	True;True;True	3547;11157;13199	8869;8870;27723;33084;33085	8680;27669;33255;33256	8680;27669;33256
Q99439	CNN2	Calponin-2 OS=Homo sapiens GN=CNN2 PE=1 SV=4	Calponin-2	8	8	8	1	8	8	8	1	8	1	8	1	8	32.4	32.4	32.4	33.697	309	309	0	107.82	By MS/MS	By MS/MS	3.6	32.4	271870000	0	271870000	0	241030000	1	18	19				2280	936;2540;3359;8260;17887;18268;18269;19862	True;True;True;True;True;True;True;True	1015;1016;2741;3625;8898;19524;19525;19933;19934;21645	2591;2592;2593;6926;6927;9066;9067;9068;22020;22021;22022;49049;49050;49051;49052;50008;50009;54690;54691;54692;54693	2552;2553;2554;6782;6783;8860;8861;21672;21673;21674;49202;49203;49204;49205;50127;50128;55097;55098;55099	2553;6783;8860;21673;49205;50127;50128;55099	2077;2078	79;170
Q15417	CNN3	Calponin-3 OS=Homo sapiens GN=CNN3 PE=1 SV=1	Calponin-3	6	6	6	1	6	6	6	0	6	0	6	0	6	23.4	23.4	23.4	36.413	329	329	0	44.907		By MS/MS	0	23.4	58520000	0	58520000	0	58520000	0	9	9				1721	942;3289;4590;7821;15687;22263	True;True;True;True;True;True	1022;3548;4953;8431;17150;24253	2604;2605;8871;8872;8873;12238;20844;43174;61505;61506;61507	2563;2564;8681;8682;12024;20581;43560;61663;61664	2563;8681;12024;20581;43560;61663
A5YKK6	CNOT1	CCR4-NOT transcription complex subunit 1 OS=Homo sapiens GN=CNOT1 PE=1 SV=2	CCR4-NOT transcription complex subunit 1	12	12	12	1	12	12	12	0	12	0	12	0	12	8.1	8.1	8.1	266.94	2376	2376	0	78.397		By MS/MS	0	8.1	70128000	0	70128000	0	70128000	0	17	17				8	1732;2008;2851;8200;10240;11056;14498;15197;15655;17688;18405;20928	True;True;True;True;True;True;True;True;True;True;True;True	1882;2171;3073;8835;11004;11901;15770;16606;17113;19310;20075;22804	4771;5469;7773;7774;21852;27356;27357;29669;39541;41652;43059;43060;48526;50424;50425;57778	4628;5388;5389;7624;7625;21533;27303;29622;39636;41839;43432;43433;48734;50543;50544;50545;58034	4628;5388;7625;21533;27303;29622;39636;41839;43432;48734;50544;58034	3	1
P09543	CNP	2,3-cyclic-nucleotide 3-phosphodiesterase OS=Homo sapiens GN=CNP PE=1 SV=2	2,3-cyclic-nucleotide 3-phosphodiesterase	16	16	16	1	16	16	16	5	15	5	15	5	15	43.9	43.9	43.9	47.578	421	421	0	138.18	By MS/MS	By MS/MS	12.8	40.6	590110000	328860	589780000	554140	589560000	1	26	27				538	944;1015;1087;1686;3558;5495;10298;11682;11971;13460;14101;15470;15471;16137;16833;20333	True;True;True;True;True;True;True;True;True;True;True;True;True;True;True;True	1024;1100;1183;1833;3833;5929;11066;12565;12868;14468;15185;16913;16914;17638;18388;22154	2608;2609;2798;2799;2800;2801;3004;3005;4617;9586;9587;14626;27504;27505;27506;31460;31461;31462;32145;36354;36355;38267;38268;38269;38270;42592;42593;42594;42595;42596;42597;44438;44439;44440;46273;55992;55993	2568;2763;2764;2765;2961;4462;9353;9354;9355;9356;14377;27453;31509;31510;32142;36403;36404;38357;38358;42950;42951;42952;42953;44782;44783;46450;56360;56361;56362	2568;2765;2961;4462;9353;14377;27453;31510;32142;36403;38357;42950;42952;44782;46450;56360
Q9BT09	CNPY3	Protein canopy homolog 3 OS=Homo sapiens GN=CNPY3 PE=1 SV=1	Protein canopy homolog 3	2	2	2	1	2	2	2	0	2	0	2	0	2	11.2	11.2	11.2	30.748	278	278	0.00075557	12.968		By MS/MS	0	11.2	972120	0	972120	0	972120	0	2	2				2334	2000;5613	True;True	2163;6052	5451;14911	5376;14644	5376;14644
Q96F85	CNRIP1	CB1 cannabinoid receptor-interacting protein 1 OS=Homo sapiens GN=CNRIP1 PE=1 SV=1	CB1 cannabinoid receptor-interacting protein 1	5	5	5	1	5	5	5	0	5	0	5	0	5	55.5	55.5	55.5	18.648	164	164	0	42.456		By MS/MS	0	55.5	25667000	0	25667000	0	25667000	0	9	9				2210	3385;7607;10119;16487;21897	True;True;True;True;True	3654;8203;10877;18014;23863	9131;20228;27029;45370;45371;45372;60578	8921;8922;19909;26951;45602;45603;45604;45605;60740	8922;19909;26951;45604;60740
Q13057	COASY	Bifunctional coenzyme A synthase OS=Homo sapiens GN=COASY PE=1 SV=4	Bifunctional coenzyme A synthase;Phosphopantetheine adenylyltransferase;Dephospho-CoA kinase	3	3	3	1	3	3	3	0	3	0	3	0	3	7.6	7.6	7.6	62.328	564	564	0	19.722		By MS/MS	0	7.6	15137000	0	15137000	0	15137000	0	3	3				1546	3302;9315;11945	True;True;True	3561;10034;12841	8908;24777;24778;32092	8710;24532;32095	8710;24532;32095
Q53SF7	COBLL1	Cordon-bleu protein-like 1 OS=Homo sapiens GN=COBLL1 PE=1 SV=2	Cordon-bleu protein-like 1	3	3	3	1	3	3	3	0	3	0	3	0	3	2.9	2.9	2.9	131.79	1204	1204	0	23.176		By MS/MS	0	2.9	2235700	0	2235700	0	2235700	0	3	3				1814	4114;4588;5772	True;True;True	4451;4951;6219	11082;12233;15281	10865;12021;14979	10865;12021;14979
Q99715	COL12A1	Collagen alpha-1(XII) chain OS=Homo sapiens GN=COL12A1 PE=1 SV=2	Collagen alpha-1(XII) chain	26	26	26	1	26	26	26	0	26	0	26	0	26	12.9	12.9	12.9	333.14	3063	3063	0	195.3		By MS/MS	0	12.9	52150000	0	52150000	0	52150000	0	28	28				2299	1221;7770;8328;8400;8730;9741;10790;10806;10821;12153;12255;12495;12790;13265;14331;15250;15360;15482;18833;19214;19981;20613;21117;21600;21896;21925	True;True;True;True;True;True;True;True;True;True;True;True;True;True;True;True;True;True;True;True;True;True;True;True;True;True	1327;8377;8973;9052;9408;10481;11611;11628;11644;13066;13172;13430;13744;14265;15523;16663;16795;16925;20535;20946;21772;22455;23002;23538;23862;23893	3346;3347;20728;22191;22192;22371;23252;25878;28892;28924;28925;28963;32782;32783;33017;33640;34447;35792;35793;38976;41792;42303;42619;51780;51781;52852;52853;54973;54974;56808;58275;58276;59662;60576;60577;60644	3251;20478;21824;21825;21986;21987;22807;25708;28829;28855;28891;32992;32993;33202;33787;34506;35838;39066;41973;42664;42971;52038;53147;53148;55362;57135;58471;58472;59784;60738;60739;60796	3251;20478;21824;21986;22807;25708;28829;28855;28891;32992;33202;33787;34506;35838;39066;41973;42664;42971;52038;53147;55362;57135;58471;59784;60739;60796
P39060	COL18A1	Collagen alpha-1(XVIII) chain OS=Homo sapiens GN=COL18A1 PE=1 SV=5	Collagen alpha-1(XVIII) chain;Endostatin	3	3	3	1	3	3	3	0	3	0	3	0	3	3.6	3.6	3.6	178.19	1754	1754	0.00042571	17.615		By MS/MS	0	3.6	5037700	0	5037700	0	5037700	0	4	4				994	377;8644;13414	True;True;True	412;9320;14421	1102;23027;36230	1141;22600;22601;36294	1141;22601;36294
P08123	COL1A2	Collagen alpha-2(I) chain OS=Homo sapiens GN=COL1A2 PE=1 SV=7	Collagen alpha-2(I) chain	7	7	7	1	7	7	7	0	7	0	7	0	7	8.1	8.1	8.1	129.31	1366	1366	0	54.125		By MS/MS	0	8.1	10026000	0	10026000	0	10026000	0	9	9				504	2311;7254;7466;7756;15499;17802;21919	True;True;True;True;True;True;True	2502;7823;8055;8362;16944;19431;23886	6318;6319;19291;19894;20699;42648;48813;60628;60629	6201;6202;18992;19604;20452;42994;42995;48979;60780	6201;18992;19604;20452;42995;48979;60780
Q9Y5P4	COL4A3BP	Collagen type IV alpha-3-binding protein OS=Homo sapiens GN=COL4A3BP PE=1 SV=1	Collagen type IV alpha-3-binding protein	2	2	2	1	2	2	2	0	2	0	2	0	2	6.1	6.1	6.1	70.834	624	624	0.00080386	14.777		By MS/MS	0	6.1	1310300	0	1310300	0	1310300	0	3	3				2803	6330;17119	True;True	6829;18691	16750;47068	16450;47272;47273	16450;47272
P12109	COL6A1	Collagen alpha-1(VI) chain OS=Homo sapiens GN=COL6A1 PE=1 SV=3	Collagen alpha-1(VI) chain	17	17	17	1	17	17	17	2	17	2	17	2	17	27.9	27.9	27.9	108.53	1028	1028	0	323.31	By matching	By MS/MS	2.7	27.9	251320000	23552	251300000	28417	249300000	0	41	41				594	2810;4345;4413;5907;8176;8395;8739;9460;12744;13423;15282;15359;15779;18617;20073;20469;22580	True;True;True;True;True;True;True;True;True;True;True;True;True;True;True;True;True	3030;3031;4696;4767;6377;8810;9047;9417;10189;13695;14430;16696;16794;17247;20297;21873;22301;24585	7640;7641;7642;7643;7644;7645;7646;7647;7648;11669;11670;11812;11813;11814;15636;15637;21784;22361;22362;23270;25151;25152;25153;25154;34304;34305;34306;34307;34308;34309;36255;41967;42302;43395;43396;51084;55285;56375;56376;56377;56378;62289;62290	7488;7489;7490;7491;7492;7493;7494;11484;11485;11599;11600;15310;21481;21974;21975;21976;22825;24980;34364;34365;34366;34367;34368;34369;34370;36315;42261;42663;43753;51265;55716;55717;56724;56725;56726;56727;62411;62412;62413;62414;62415	7489;11484;11599;15310;21481;21976;22825;24980;34364;36315;42261;42663;43753;51265;55717;56727;62414	544	238
P12110	COL6A2	Collagen alpha-2(VI) chain OS=Homo sapiens GN=COL6A2 PE=1 SV=4	Collagen alpha-2(VI) chain	12	12	12	1	12	12	12	1	12	1	12	1	12	19	19	19	108.58	1019	1019	0	92.448	By matching	By MS/MS	1.1	19	90956000	10443	90945000	0	90945000	0	22	22				595	3417;4540;7270;8826;9047;12017;14894;14995;16477;20397;20612;22402	True;True;True;True;True;True;True;True;True;True;True;True	3687;4901;7839;9513;9747;12917;16286;16391;18004;22222;22454;24395	9227;9228;12115;12116;12117;19328;19329;23534;23535;24184;24185;32259;32260;32261;32262;40902;40903;40904;41150;41151;45351;56176;56177;56807;61846	9000;11902;11903;11904;19025;23086;23087;23827;23828;32252;32253;32254;41091;41092;41093;41336;45582;56543;56544;56545;57134;61983;61984	9000;11903;19025;23087;23827;32252;41092;41336;45582;56543;57134;61983
P12111	COL6A3	Collagen alpha-3(VI) chain OS=Homo sapiens GN=COL6A3 PE=1 SV=5	Collagen alpha-3(VI) chain	63	63	63	1	63	63	63	4	63	4	63	4	63	29.8	29.8	29.8	343.67	3177	3177	0	323.31	By MS/MS	By MS/MS	1.9	29.8	966360000	137690	966220000	165900	966190000	1	125	126				596	213;346;629;1292;1343;1361;3216;4107;4170;4496;5339;6601;7333;7398;7478;9661;9679;9870;10646;10725;10927;12851;12865;12996;13267;13342;14374;14747;14749;15102;15340;16044;16254;16352;16416;16571;17071;17423;17674;17675;18068;18152;18180;18302;18421;18863;19541;20053;20057;20074;20083;20125;20303;20306;20396;20556;20568;20610;20611;21574;21766;21798;22706	True;True;True;True;True;True;True;True;True;True;True;True;True;True;True;True;True;True;True;True;True;True;True;True;True;True;True;True;True;True;True;True;True;True;True;True;True;True;True;True;True;True;True;True;True;True;True;True;True;True;True;True;True;True;True;True;True;True;True;True;True;True;True	235;375;687;1406;1459;1477;3470;4443;4508;4854;5765;7117;7910;7981;8068;10400;10418;10616;11458;11542;11759;13807;13821;13974;14267;14349;15583;16126;16128;16503;16775;17539;17763;17864;17931;18105;18637;19017;19294;19295;19720;19807;19838;19967;20091;20567;21302;21852;21856;21874;21884;21930;22122;22125;22221;22394;22406;22452;22453;23512;23725;23759;24727	599;600;601;602;1006;1007;1773;3582;3583;3714;3715;3716;3760;3761;8676;8677;8678;8679;11055;11204;11205;12006;12007;12008;12009;14158;17408;19512;19513;19709;19710;19711;19712;19927;19928;19929;25697;25698;25699;25700;25734;25735;25736;26327;28500;28501;28709;28710;28711;28712;29268;29269;29270;34619;34620;34621;34622;34623;34624;34625;34684;34685;35103;35104;35105;35795;36045;36046;39110;39111;3…	621;622;623;624;625;1044;1775;3473;3474;3588;3589;3590;3633;3634;8497;8498;8499;10842;10988;10989;10990;11795;11796;11797;13900;17038;19212;19213;19423;19424;19425;19426;19632;19633;19634;25526;25527;25528;25560;26317;28455;28652;28653;29206;34673;34674;34675;34676;34782;35176;35177;35178;35841;36106;39196;39197;40711;40712;40713;40714;40715;40716;40717;40718;40719;40720;40721;40724;40725;41606;4…	625;1044;1775;3473;3588;3633;8497;10842;10988;11796;13900;17038;19213;19425;19632;25526;25560;26317;28455;28652;29206;34676;34782;35176;35841;36106;39197;40716;40725;41606;42623;44547;45031;45303;45442;45786;47167;48016;48700;48701;49669;49861;49926;50224;50580;52093;54111;55660;55673;55719;55736;55831;56299;56303;56542;57002;57030;57131;57132;59723;60422;60504;62839
Q8NBJ5	COLGALT1	Procollagen galactosyltransferase 1 OS=Homo sapiens GN=COLGALT1 PE=1 SV=1	Procollagen galactosyltransferase 1	8	8	8	1	8	8	8	2	8	2	8	2	8	13.2	13.2	13.2	71.635	622	622	0	52.09	By matching	By MS/MS	3.2	13.2	27194000	34867	27159000	71756	27122000	0	11	11				2042	1441;5096;12552;14735;15483;15484;17859;22122	True;True;True;True;True;True;True;True	1561;5500;13489;16112;16926;16927;19490;24100	4003;13527;33761;33762;40469;40470;42620;42621;48955;48956;61153;61154;61155;61156	3866;3867;3868;13311;33894;40675;42972;42973;49104;61331;61332	3868;13311;33894;40675;42972;42973;49104;61332
Q8N668	COMMD1	COMM domain-containing protein 1 OS=Homo sapiens GN=COMMD1 PE=1 SV=1	COMM domain-containing protein 1	3	3	3	1	3	3	3	0	3	0	3	0	3	36.8	36.8	36.8	21.178	190	190	0	47.151		By MS/MS	0	36.8	24632000	0	24632000	0	24632000	0	4	4				2032	123;16161;17536	True;True;True	133;17662;19143	342;44508;48101;48102;48103	379;380;44850;48287	380;44850;48287
Q9Y6G5	COMMD10	COMM domain-containing protein 10 OS=Homo sapiens GN=COMMD10 PE=1 SV=1	COMM domain-containing protein 10	4	4	4	1	4	4	4	0	4	0	4	0	4	27.2	27.2	27.2	22.966	202	202	0	39.917		By MS/MS	0	27.2	26165000	0	26165000	0	26165000	0	5	5				2830	524;2358;11992;18010	True;True;True;True	577;2551;12890;19659	1477;6433;6434;6435;32191;49381;49382	1492;6295;6296;6297;32183;49538	1492;6295;32183;49538
Q86X83	COMMD2	COMM domain-containing protein 2 OS=Homo sapiens GN=COMMD2 PE=1 SV=2	COMM domain-containing protein 2	4	4	4	1	4	4	4	0	4	0	4	0	4	29.1	29.1	29.1	22.745	199	199	0	36.172		By MS/MS	0	29.1	36620000	0	36620000	0	35371000	0	8	8				1983	9499;11793;19119;21044	True;True;True;True	10231;12684;20845;22926;22927	25276;25277;31740;31741;52598;58095;58096	25113;31770;52916;52917;52918;58310;58311;58312	25113;31770;52916;58312	1987	186
Q9UBI1	COMMD3	COMM domain-containing protein 3 OS=Homo sapiens GN=COMMD3 PE=1 SV=1	COMM domain-containing protein 3	3	3	3	1	3	3	3	0	3	0	3	0	3	22.1	22.1	22.1	22.151	195	195	0	35.241		By MS/MS	0	22.1	58469000	0	58469000	0	57041000	0	7	7				2620	118;14200;15506	True;True;True	128;15339;15340;16951	330;331;38616;38617;38618;38619;42659;42660	365;366;38716;38717;38718;38719;43007	365;38717;43007	2238	1
Q9H0A8	COMMD4	COMM domain-containing protein 4 OS=Homo sapiens GN=COMMD4 PE=1 SV=1	COMM domain-containing protein 4	3	3	3	1	3	3	3	0	3	0	3	0	3	25.6	25.6	25.6	21.764	199	199	0	20.772		By MS/MS	0	25.6	7392300	0	7392300	0	7392300	0	4	4				2401	6573;7103;11996	True;True;True	7088;7665;12894	17338;18873;32200;32201;32202	16968;18548;32192;32193	16968;18548;32193
Q7Z4G1	COMMD6	COMM domain-containing protein 6 OS=Homo sapiens GN=COMMD6 PE=1 SV=1	COMM domain-containing protein 6	2	2	2	1	2	2	2	0	2	0	2	0	2	29.4	29.4	29.4	9.638	85	85	0	65.889		By MS/MS	0	29.4	14553000	0	14553000	0	12457000	0	5	5				1957	14142;17170	True;True	15251;15252;18745	38423;38424;47183;47184	38513;38514;47375;47376;47377	38513;47376	1982	1
Q9NX08	COMMD8	COMM domain-containing protein 8 OS=Homo sapiens GN=COMMD8 PE=1 SV=1	COMM domain-containing protein 8	2	2	2	1	2	2	2	0	2	0	2	0	2	19.1	19.1	19.1	21.09	183	183	0.0017832	11.204		By MS/MS	0	19.1	6094800	0	6094800	0	6094800	0	2	2				2555	14218;15225	True;True	15362;16637	38694;41723	38805;41900	38805;41900
Q9P000	COMMD9	COMM domain-containing protein 9 OS=Homo sapiens GN=COMMD9 PE=1 SV=2	COMM domain-containing protein 9	4	4	4	1	4	4	4	1	4	1	4	1	4	31.3	31.3	31.3	21.819	198	198	0	54.921	By matching	By MS/MS	6.1	31.3	63683000	32377	63650000	0	63650000	0	8	8				2591	183;10475;14049;18809	True;True;True;True	198;11273;15108;20510	502;503;504;505;28025;28026;28027;38093;51721;51722	523;524;525;526;27944;27945;38180;51965	524;27945;38180;51965
P21964	COMT	Catechol O-methyltransferase OS=Homo sapiens GN=COMT PE=1 SV=2	Catechol O-methyltransferase	12	12	12	1	12	12	12	1	12	1	12	1	12	60.1	60.1	60.1	30.037	271	271	0	172.21	By MS/MS	By MS/MS	5.9	60.1	753740000	115870	753630000	0	738670000	1	27	28				786	3568;6465;8608;8720;10249;10820;11171;11422;12479;14659;21656;22280	True;True;True;True;True;True;True;True;True;True;True;True	3843;6978;9281;9398;11015;11643;12021;12285;12286;13413;16008;23595;24271	9607;9608;9609;17064;17065;22934;22935;22936;23218;23219;23220;23221;23222;23223;27391;27392;28960;28961;28962;29971;30574;30575;33573;33574;33575;33576;40196;40197;40198;59886;59887;59888;59889;59890;61547	9374;9375;16709;16710;22516;22517;22777;22778;22779;22780;27346;27347;28889;28890;29898;30455;30456;30457;30458;33703;33704;33705;40425;60083;60084;60085;61702;61703	9374;16710;22517;22779;27346;28889;29898;30455;33704;40425;60084;61702	904	187
P53621	COPA	Coatomer subunit alpha OS=Homo sapiens GN=COPA PE=1 SV=2	Coatomer subunit alpha;Xenin;Proxenin	39	39	39	1	39	39	39	3	39	3	39	3	39	43.4	43.4	43.4	138.34	1224	1224	0	323.31	By MS/MS	By MS/MS	2.9	43.4	890490000	136750	890360000	163850	853060000	1	83	84				1199	1989;2449;2698;2802;2803;3879;4373;6208;6228;7043;8102;8365;8822;11216;11421;12162;12640;12694;12816;12948;13399;14055;14957;15262;16074;16085;17388;17580;17665;18183;19035;19198;19660;19729;21074;21427;21903;22215;22904	True;True;True;True;True;True;True;True;True;True;True;True;True;True;True;True;True;True;True;True;True;True;True;True;True;True;True;True;True;True;True;True;True;True;True;True;True;True;True	2151;2645;2911;3022;3023;4188;4189;4724;6700;6720;7598;8733;9016;9508;9509;12068;12284;13075;13076;13583;13639;13770;13771;13923;14406;15116;16353;16675;17570;17582;18977;19190;19285;19841;20754;20929;21427;21501;22958;23353;23869;24197;24933;24934	5430;5431;6669;6670;6671;7365;7366;7625;7626;7627;10431;10432;10433;10434;10435;11723;11724;16417;16418;16457;18687;18688;18689;18690;21604;21605;21606;22286;22287;23524;23525;23526;23527;30099;30573;32806;32807;32808;32809;34045;34046;34047;34177;34511;34512;34513;34514;34515;34516;34517;34518;34519;34520;34942;34943;34944;36179;36180;38112;41059;41823;41824;41825;44267;44296;44297;47734;47735;4…	5357;5358;6520;6521;7251;7252;7473;7474;7475;10202;10203;10204;11531;11532;16107;16138;18341;18342;18343;18344;21306;21307;21308;21909;21910;23076;23077;23078;23079;23080;23081;30015;30454;33015;33016;33017;33018;33019;33020;33021;34130;34131;34132;34249;34563;34564;34565;34566;34567;34568;35008;36246;38207;41238;42012;42013;44604;44605;44606;44636;47889;47890;47891;47892;47893;48409;48410;48690;…	5357;6520;7251;7473;7474;10202;11531;16107;16138;18343;21307;21910;23076;30015;30454;33020;34130;34249;34565;35008;36246;38207;41238;42013;44605;44636;47889;48409;48690;49931;52620;53113;54438;54648;58388;59302;60748;61537;63575	1381;1382;1383;1384;1385	217;500;692;729;802
P53618	COPB1	Coatomer subunit beta OS=Homo sapiens GN=COPB1 PE=1 SV=3	Coatomer subunit beta	19	19	19	1	19	19	19	0	19	0	19	0	19	30	30	30	107.14	953	953	0	270.59		By MS/MS	0	30	324930000	0	324930000	0	306820000	0	36	36				1198	54;4661;4687;4901;4928;12502;12695;14759;14965;15679;17733;18062;18592;20037;21029;21051;21062;21711;22288	True;True;True;True;True;True;True;True;True;True;True;True;True;True;True;True;True;True;True	61;5028;5056;5289;5290;5318;13437;13640;16138;16361;17140;17141;19357;19714;20271;21836;22910;22911;22934;22945;23656;24279	156;12416;12417;12418;12500;12501;13056;13057;13058;13116;13117;13118;33656;34178;40541;41073;41074;43155;43156;43157;48633;48634;49513;49514;50959;50960;55183;58065;58066;58067;58068;58114;58135;58136;58137;60042;60043;60044;61563;61564	170;12205;12287;12288;12836;12837;12838;12839;12887;12888;33798;34250;40745;41253;41254;43541;43542;43543;48828;49661;49662;51088;51089;55616;58282;58283;58327;58328;58346;58347;60231;60232;60233;60234;61716;61717	170;12205;12287;12837;12888;33798;34250;40745;41254;43542;48828;49662;51089;55616;58282;58328;58346;60232;61717	1378;1379;1380	323;476;674
P35606	COPB2	Coatomer subunit beta OS=Homo sapiens GN=COPB2 PE=1 SV=2	Coatomer subunit beta	22	22	22	1	22	22	22	4	22	4	22	4	22	40.4	40.4	40.4	102.49	906	906	0	323.31	By MS/MS	By MS/MS	6.4	40.4	553120000	181020	552940000	210590	552070000	2	57	59				957	109;3863;3941;4679;5060;6680;8811;9513;11986;15647;15693;16497;17345;17350;18418;18467;18721;18928;19350;20450;20641;20822	True;True;True;True;True;True;True;True;True;True;True;True;True;True;True;True;True;True;True;True;True;True	118;4167;4261;5048;5463;5464;7203;9497;10246;12884;17105;17156;18024;18930;18936;20088;20139;20414;20640;21099;21100;22281;22483;22484;22691	300;301;302;303;10382;10383;10384;10385;10386;10606;10607;12475;13448;13449;17672;17673;23491;23492;23493;23494;23495;25309;25310;25311;25312;32181;32182;43043;43044;43186;45401;45402;47615;47616;47617;47618;47627;50452;50453;50584;50585;51426;51427;52005;52006;53270;53271;56321;56322;56323;56324;56862;56863;56864;57446;57447;57448;57449;57450;57451	336;337;338;10163;10164;10372;10373;12261;13232;13233;17329;23042;23043;23044;23045;23046;25144;25145;25146;25147;25148;25149;25150;32174;43418;43567;43568;45632;45633;47781;47782;47783;47784;47785;47786;47795;50568;50569;50570;50571;50689;50690;51593;51594;51595;51596;51597;52272;53600;53601;56677;56678;56679;57185;57186;57187;57739;57740;57741;57742	336;10163;10373;12261;13232;17329;23043;25150;32174;43418;43568;45633;47785;47795;50568;50689;51597;52272;53601;56677;57187;57741	1118;1119;1120	94;308;561
O14579	COPE	Coatomer subunit epsilon OS=Homo sapiens GN=COPE PE=1 SV=3	Coatomer subunit epsilon	7	7	7	1	7	7	7	0	7	0	7	0	7	36	36	36	34.482	308	308	0	86.205		By MS/MS	0	36	88779000	0	88779000	0	81033000	0	22	22				104	1699;4192;6797;13158;13793;14251;14535	True;True;True;True;True;True;True	1847;4530;7327;14145;14824;15414;15415;15827;15828	4670;4671;4672;4673;11249;11250;18017;18018;35514;37339;37340;38787;38788;39738;39739;39740;39741;39742;39743;39744	4502;4503;4504;11035;11036;11037;17680;17681;17682;35575;37445;37446;38889;38890;39892;39893;39894;39895;39896;39897;39898;39899;39900	4504;11035;17680;35575;37446;38890;39898	70;71	86;172
Q9Y678	COPG1	Coatomer subunit gamma-1 OS=Homo sapiens GN=COPG1 PE=1 SV=1	Coatomer subunit gamma-1	28	28	26	1	28	28	26	3	28	3	28	3	26	48.7	48.7	45.4	97.717	874	874	0	323.31	By matching	By MS/MS	4.7	48.7	601430000	31504	601400000	38077	588670000	0	58	58				2820	1250;1417;1464;2119;2768;2769;2931;3061;4217;5531;5814;6218;6740;9249;10206;11053;12080;12753;12967;15137;17537;17815;18235;18473;19209;20444;21324;21812	True;True;True;True;True;True;True;True;True;True;True;True;True;True;True;True;True;True;True;True;True;True;True;True;True;True;True;True	1358;1536;1584;2291;2986;2987;3160;3297;4561;5968;6274;6710;7267;9963;10967;11898;12987;13704;13944;16542;16543;19144;19444;19899;20146;20941;22275;23244;23773	3467;3468;3931;3932;3933;3934;4049;4050;5776;5777;7525;7526;7527;7528;7998;7999;8000;8001;8275;8276;11329;11330;11331;14700;14701;14702;14703;14704;15410;15411;15412;15413;16438;17851;17852;17853;17854;24617;24618;24619;24620;24621;27250;27251;29661;29662;32533;32534;32535;32536;34337;34338;35013;35014;41522;41523;48104;48105;48836;48837;49941;49942;50603;52846;52847;56310;56311;56312;58917;60351…	3366;3802;3803;3804;3805;3911;3912;5693;5694;7389;7390;7841;7842;7843;7844;8146;11120;11121;11122;14439;14440;15106;15107;15108;16120;17527;17528;17529;17530;24381;24382;24383;24384;24385;27157;27158;29617;29618;32704;32705;34389;35085;35086;41699;41700;48288;48289;48999;49000;50068;50069;50070;50704;53141;53142;56667;56668;59044;60541	3366;3805;3912;5693;7389;7390;7841;8146;11122;14440;15108;16120;17527;24383;27158;29618;32704;34389;35085;41700;48289;48999;50068;50704;53141;56667;59044;60541	2328	265
Q9UBF2	COPG2	Coatomer subunit gamma-2 OS=Homo sapiens GN=COPG2 PE=1 SV=1	Coatomer subunit gamma-2	5	3	3	1	5	3	3	0	5	0	3	0	3	7.5	4.1	4.1	97.621	871	871	0.00043611	18.724		By MS/MS	0	7.5	5534700	0	5534700	0	5534700	0	2	2				2617	3062;5531;9818;12081;17537	True;False;True;True;False	3298;5968;10560;12988;19144	8277;8278;14700;14701;14702;14703;14704;26175;26176;32537;32538;48104;48105	8147;14439;14440;26158;32706;48288;48289	8147;14440;26158;32706;48289
P61201	COPS2	COP9 signalosome complex subunit 2 OS=Homo sapiens GN=COPS2 PE=1 SV=1	COP9 signalosome complex subunit 2	11	11	11	1	11	11	11	0	11	0	11	0	11	39.1	39.1	39.1	51.596	443	443	0	96.213		By MS/MS	0	39.1	55993000	0	55993000	0	55993000	0	15	15				1282	1036;1538;5690;9624;14868;16354;16428;17592;19364;20893;22143	True;True;True;True;True;True;True;True;True;True;True	1127;1665;6134;10362;16258;17866;17943;19206;21117;22767;24122	2858;4278;4279;15080;15081;25606;40844;40845;45020;45203;48273;48274;53318;57686;61205;61206	2822;4145;14792;14793;14794;25427;41034;41035;45312;45461;48464;48465;53642;57948;61373;61374	2822;4145;14793;25427;41035;45312;45461;48465;53642;57948;61374
Q9UNS2	COPS3	COP9 signalosome complex subunit 3 OS=Homo sapiens GN=COPS3 PE=1 SV=3	COP9 signalosome complex subunit 3	8	8	8	1	8	8	8	0	8	0	8	0	8	27.7	27.7	27.7	47.873	423	423	0	73.737		By MS/MS	0	27.7	89548000	0	89548000	0	89548000	0	12	12				2716	1559;1890;3311;3939;16403;17881;22208;22678	True;True;True;True;True;True;True;True	1690;2048;3572;4258;17918;19513;19514;24190;24694	4329;5182;5183;8926;8927;10602;45144;45145;49022;49023;61359;62571;62572	4191;5088;5089;5090;8726;10369;45414;49172;49173;61520;62694;62695	4191;5090;8726;10369;45414;49172;61520;62695	2277	408
Q9BT78	COPS4	COP9 signalosome complex subunit 4 OS=Homo sapiens GN=COPS4 PE=1 SV=1	COP9 signalosome complex subunit 4	9	9	9	1	9	9	9	0	9	0	9	0	9	34.5	34.5	34.5	46.268	406	406	0	131.33		By MS/MS	0	34.5	127820000	0	127820000	0	126390000	0	19	19				2336	1975;2301;10674;13964;13970;14489;14740;16016;16762	True;True;True;True;True;True;True;True;True	2136;2490;11489;11490;11491;15004;15010;15757;16117;17504;18313	5398;5399;6288;6289;6290;28570;28571;28572;28573;28574;37849;37850;37858;37859;37860;39523;40479;40480;40481;40482;40483;44123;46113	5329;5330;5331;6179;6180;28521;28522;28523;28524;37954;37965;37966;39619;40684;40685;40686;40687;44473;46294	5329;6179;28524;37954;37966;39619;40686;44473;46294	2121;2122	400;404
Q92905	COPS5	COP9 signalosome complex subunit 5 OS=Homo sapiens GN=COPS5 PE=1 SV=4	COP9 signalosome complex subunit 5	8	8	8	1	8	8	8	1	8	1	8	1	8	33.8	33.8	33.8	37.578	334	334	0	53.773	By matching	By MS/MS	5.7	33.8	42523000	32656	42491000	0	42491000	0	14	14				2146	244;8933;9657;11975;16776;19673;20164;21220	True;True;True;True;True;True;True;True	268;9624;10396;12873;18327;21443;21972;23130	705;706;23849;23850;23851;23852;23853;23854;25689;25690;32161;32162;46144;54171;55524;55525;58621;58622	735;736;23412;23413;23414;23415;25519;25520;32157;32158;46316;54520;55952;58781;58782	735;23413;25519;32157;46316;54520;55952;58781
Q7L5N1	COPS6	COP9 signalosome complex subunit 6 OS=Homo sapiens GN=COPS6 PE=1 SV=1	COP9 signalosome complex subunit 6	8	8	8	1	8	8	8	0	8	0	8	0	8	37.9	37.9	37.9	36.163	327	327	0	73.868		By MS/MS	0	37.9	67396000	0	67396000	0	67396000	0	10	10				1941	1910;10044;14615;15074;15893;16653;18713;18741	True;True;True;True;True;True;True;True	2070;10799;15947;16473;17372;18193;20406;20434	5250;5251;26810;40059;41331;43748;43749;45818;45819;51410;51484	5180;5181;26747;40267;41527;44108;44109;45998;45999;51578;51654	5181;26747;40267;41527;44108;45998;51578;51654
Q9UBW8	COPS7A	COP9 signalosome complex subunit 7a OS=Homo sapiens GN=COPS7A PE=1 SV=1	COP9 signalosome complex subunit 7a	5	5	5	1	5	5	5	0	5	0	5	0	5	21.8	21.8	21.8	30.276	275	275	0	49.388		By MS/MS	0	21.8	21735000	0	21735000	0	21735000	0	7	7				2632	5521;9202;16027;16326;21627	True;True;True;True;True	5957;9912;17518;17837;23566	14669;14670;24502;44159;44160;44937;44938;59773;59774	14416;14417;24253;44509;45231;59954;59955	14417;24253;44509;45231;59955
Q9H9Q2	COPS7B	COP9 signalosome complex subunit 7b OS=Homo sapiens GN=COPS7B PE=1 SV=1	COP9 signalosome complex subunit 7b	3	3	3	1	3	3	3	0	3	0	3	0	3	18.9	18.9	18.9	29.622	264	264	0	21.832		By MS/MS	0	18.9	4513900	0	4513900	0	4513900	0	3	3				2466	847;5573;6117	True;True;True	917;6011;6600	2338;14797;16167	2323;14534;15838	2323;14534;15838
Q99627	COPS8	COP9 signalosome complex subunit 8 OS=Homo sapiens GN=COPS8 PE=1 SV=1	COP9 signalosome complex subunit 8	5	5	5	1	5	5	5	2	5	2	5	2	5	41.1	41.1	41.1	23.225	209	209	0	55.996	By MS/MS	By MS/MS	13.9	41.1	89464000	26140	89437000	0	89437000	1	11	12				2295	3187;6845;8065;13542;16978	True;True;True;True;True	3438;7377;8691;14555;18538	8591;8592;18132;18133;18134;18135;21465;21466;21467;36550;46668;46669;46670;46671	8419;8420;17815;17816;17817;17818;21138;21139;21140;36571;46828;46829	8420;17816;21139;36571;46829
P61923	COPZ1	Coatomer subunit zeta-1 OS=Homo sapiens GN=COPZ1 PE=1 SV=1	Coatomer subunit zeta-1	3	3	3	1	3	3	3	0	3	0	3	0	3	24.3	24.3	24.3	20.198	177	177	0	49.731		By MS/MS	0	24.3	44738000	0	44738000	0	39013000	0	5	5				1302	7679;14137;22944	True;True;True	8278;15243;15244;24975	20483;38405;38406;38407;63404;63405	20260;38494;38495;38496;63666	20260;38495;63666	1501	1
Q9BR76	CORO1B	Coronin-1B OS=Homo sapiens GN=CORO1B PE=1 SV=1	Coronin-1B	10;1	10;1	10;1	2	10	10	10	0	10	0	10	0	10	29.4	29.4	29.4	54.234	489	489;1794	0	74.841		By MS/MS	0	29.4	283020000	0	283020000	0	283020000	0	16	16				2322	2801;9351;11044;11342;11771;11876;14875;20541;21719;22353	True;True;True;True;True;True;True;True;True;True	3021;10074;11888;12200;12660;12770;16266;22378;23665;24346	7623;7624;24854;29635;29636;30390;30391;30392;31686;31687;31929;31930;31931;40860;40861;40862;56596;60062;60063;60064;61737;61738	7471;7472;24613;29597;30282;30283;30284;31718;31719;31936;41050;56927;60248;60249;61887;61888	7471;24613;29597;30282;31719;31936;41050;56927;60248;61888
Q9ULV4	CORO1C	Coronin-1C OS=Homo sapiens GN=CORO1C PE=1 SV=1	Coronin-1C	18;2;1	18;2;1	18;2;1	3	18	18	18	1	18	1	18	1	18	45.1	45.1	45.1	53.248	474	474;472;461	0	232.61	By matching	By MS/MS	2.1	45.1	856800000	78041	856720000	0	829420000	0	44	44				2701	1086;2563;2589;4302;8314;9110;9350;11043;11341;14748;14874;15029;15308;16306;17572;19651;21718;22352	True;True;True;True;True;True;True;True;True;True;True;True;True;True;True;True;True;True	1182;2765;2793;4652;8956;9813;10073;11887;12199;16127;16265;16425;16734;16735;16736;17816;19181;21417;23664;24345	3001;3002;3003;6985;6986;7042;7043;11555;22146;22147;22148;24288;24289;24853;29633;29634;30385;30386;30387;30388;30389;40514;40515;40516;40517;40857;40858;40859;41232;41233;42148;42149;42150;42151;42152;42153;42154;42155;44877;44878;44879;48196;54091;54092;60059;60060;60061;61733;61734;61735;61736	2958;2959;2960;6842;6843;6891;11372;21779;23952;24612;29595;29596;30276;30277;30278;30279;30280;30281;40722;40723;41048;41049;41426;41427;42530;42531;42532;42533;42534;42535;42536;45183;45184;48392;54423;54424;60246;60247;61881;61882;61883;61884;61885;61886	2960;6842;6891;11372;21779;23952;24612;29596;30276;40722;41048;41426;42530;45183;48392;54423;60247;61886	2270;2271	253;262
P57737	CORO7	Coronin-7 OS=Homo sapiens GN=CORO7 PE=1 SV=2	Coronin-7	5	5	5	1	5	5	5	0	5	0	5	0	5	11.6	11.6	11.6	100.6	925	925	0	34.91		By MS/MS	0	11.6	36686000	0	36686000	0	36686000	0	6	6				1246	10937;13057;16528;20441;21274	True;True;True;True;True	11769;14038;18058;22272;23188	29303;35250;45462;56305;58786;58787	29237;35309;45683;56662;56663;58925	29237;35309;45683;56662;58925
Q14019	COTL1	Coactosin-like protein OS=Homo sapiens GN=COTL1 PE=1 SV=3	Coactosin-like protein	5	5	5	1	5	5	5	1	5	1	5	1	5	43.7	43.7	43.7	15.945	142	142	0	38.943	By MS/MS	By MS/MS	8.5	43.7	62207000	72554	62135000	0	62135000	1	8	9				1625	307;2992;5574;6455;22260	True;True;True;True;True	333;3226;6012;6966;24250	895;896;8155;8156;14798;14799;17041;17042;61498;61499;61500;61501	934;8033;8034;14535;16693;61656;61657;61658;61659	934;8034;14535;16693;61658
P13073	COX4I1	Cytochrome c oxidase subunit 4 isoform 1, mitochondrial OS=Homo sapiens GN=COX4I1 PE=1 SV=1	Cytochrome c oxidase subunit 4 isoform 1, mitochondrial	7	7	7	1	7	7	7	4	7	4	7	4	7	36.1	36.1	36.1	19.576	169	169	0	48.247	By MS/MS	By MS/MS	26	36.1	298500000	584460	297910000	838020	291040000	2	15	17				610	2047;3404;6099;6861;9195;17192;21239	True;True;True;True;True;True;True	2211;2212;3674;6581;7393;9905;18769;23152	5566;5567;5568;5569;5570;5571;5572;5573;9182;9183;9184;9185;9186;9187;9188;16131;16132;18174;18175;24491;47257;47258;47259;47260;58667;58668;58669;58670;58671	5486;5487;5488;5489;5490;8968;8969;8970;15808;17856;17857;24243;47447;47448;47449;58818;58819	5487;8969;15808;17856;24243;47448;58819	570	75
P20674	COX5A	Cytochrome c oxidase subunit 5A, mitochondrial OS=Homo sapiens GN=COX5A PE=1 SV=2	Cytochrome c oxidase subunit 5A, mitochondrial	6	6	6	1	6	6	6	3	6	3	6	3	6	52	52	52	16.762	150	150	0	55.825	By MS/MS	By MS/MS	20.7	52	332990000	414800	332580000	1673300	323500000	4	15	19				771	5456;8077;10006;11158;12941;22163	True;True;True;True;True;True	5888;8703;8704;10759;12007;13914;24143	14527;14528;21523;21524;21525;21526;21527;21528;21529;26672;26673;26674;29933;34911;34912;34913;34914;34915;34916;61236	14296;21234;21235;21236;21237;21238;21239;21240;21241;21242;26624;29864;34975;34976;34977;34978;61405;61406;61407	14296;21239;26624;29864;34978;61405	884	82
P10606	COX5B	Cytochrome c oxidase subunit 5B, mitochondrial OS=Homo sapiens GN=COX5B PE=1 SV=2	Cytochrome c oxidase subunit 5B, mitochondrial	4	4	4	1	4	4	4	1	4	1	4	1	4	34.1	34.1	34.1	13.696	129	129	0	27.108	By matching	By MS/MS	8.5	34.1	77335000	102840	77232000	0	77232000	0	6	6				564	4925;8164;11161;17875	True;True;True;True	5315;8798;12010;19506	13109;13110;13111;21764;21765;29940;29941;29942;29943;49005	12882;12883;21461;29871;29872;49156	12882;21461;29871;49156
P14854	COX6B1	Cytochrome c oxidase subunit 6B1 OS=Homo sapiens GN=COX6B1 PE=1 SV=2	Cytochrome c oxidase subunit 6B1	3	3	3	1	3	3	3	0	3	0	3	0	3	47.7	47.7	47.7	10.192	86	86	0	47.096		By MS/MS	0	47.7	20135000	0	20135000	0	20135000	0	5	5				639	7886;14832;21957	True;True;True	8502;16221;23926	21007;21008;40771;60745	20726;20727;40964;60933;60934	20727;40964;60933
P09669	COX6C	Cytochrome c oxidase subunit 6C OS=Homo sapiens GN=COX6C PE=1 SV=2	Cytochrome c oxidase subunit 6C	2	2	2	1	2	2	2	2	2	2	2	2	2	20	20	20	8.7813	75	75	0.0007286	11.95	By MS/MS	By MS/MS	20	20	25102000	261950	24840000	390210	24712000	1	6	7				542	883;2465	True;True	957;2662	2442;2443;2444;2445;6709;6710;6711;6712	2418;2419;2420;2421;6552;6553;6554	2420;6552
P14406	COX7A2	Cytochrome c oxidase subunit 7A2, mitochondrial OS=Homo sapiens GN=COX7A2 PE=1 SV=1	Cytochrome c oxidase subunit 7A2, mitochondrial	2	2	2	1	2	2	2	2	2	2	2	2	2	27.7	27.7	27.7	9.3959	83	83	0.00041118	15.817	By MS/MS	By MS/MS	27.7	27.7	63571000	412590	63158000	600360	62971000	2	5	7				633	7965;12076	True;True	8585;12982	21209;21210;21211;21212;32519;32520;32521;32522	20914;20915;32688;32689;32690;32691;32692	20915;32691
O75976	CPD	Carboxypeptidase D OS=Homo sapiens GN=CPD PE=1 SV=2	Carboxypeptidase D	17	17	17	1	17	17	17	2	17	2	17	2	17	18.7	18.7	18.7	152.93	1380	1380	0	217.42	By MS/MS	By MS/MS	2.2	18.7	134000000	123480	133880000	153580	131760000	1	28	29				316	1104;2317;4610;5113;5175;5663;5779;10873;13524;13754;14976;16208;17359;17786;18044;18986;22954	True;True;True;True;True;True;True;True;True;True;True;True;True;True;True;True;True	1202;2508;4975;5519;5583;6106;6226;6227;11701;14536;14783;16372;17716;18946;19413;19695;20701;24985	3051;3052;3053;6330;6331;12278;12279;13569;13570;13724;13725;15030;15295;15296;15297;15298;29102;29103;29104;36510;36511;37227;37228;41102;44612;47652;47653;48772;48773;48774;48775;49471;49472;52184;52185;63424;63425	3004;3005;6210;6211;12061;12062;13353;13498;14748;14991;14992;14993;14994;29045;36539;36540;37335;37336;41286;44951;47814;47815;48941;48942;48943;49622;52454;52455;52456;63683;63684	3004;6210;12061;13353;13498;14748;14992;29045;36539;37336;41286;44951;47815;48943;49622;52456;63684	189	541
Q99829	CPNE1	Copine-1 OS=Homo sapiens GN=CPNE1 PE=1 SV=1	Copine-1	11	11	11	1	11	11	11	3	11	3	11	3	11	25	25	25	59.058	537	537	0	88.44	By matching	By MS/MS	5	25	224090000	151830	223940000	693410	223400000	0	22	22				2307	1783;3531;4725;8681;13948;14829;15341;17121;17123;19284;21869	True;True;True;True;True;True;True;True;True;True;True	1934;3805;5098;9357;14988;16218;16776;18693;18695;21024;23833	4890;9519;9520;9521;9522;12611;12612;12613;12614;23123;23124;23125;37813;40765;40766;40767;42262;47071;47072;47075;47076;53060;53061;53062;53063;60487;60488;60489	4788;9298;9299;9300;12394;12395;12396;22694;22695;37916;40959;40960;42624;47277;47278;47280;47281;53355;53356;53357;60649;60650	4788;9299;12395;22695;37916;40960;42624;47277;47281;53357;60650
Q96FN4	CPNE2	Copine-2 OS=Homo sapiens GN=CPNE2 PE=1 SV=3	Copine-2	6	5	5	1	6	5	5	1	6	0	5	0	5	13.7	12	12	61.189	548	548	0	37.768	By matching	By MS/MS	1.6	13.7	15692000	0	15692000	0	15692000	0	5	5				2212	2320;3530;4256;8219;15232;18885	True;False;True;True;True;True	2511;3804;4603;8855;16645;20592	6337;6338;6339;9515;9516;9517;9518;11431;21921;41750;51883	6218;9295;9296;9297;11230;21592;41926;52140	6218;9296;11230;21592;41926;52140
O75131	CPNE3	Copine-3 OS=Homo sapiens GN=CPNE3 PE=1 SV=1	Copine-3	16;1;1;1	16;1;1;1	15;0;0;0	4	16	16	15	1	16	1	16	0	15	38.7	38.7	37.1	60.13	537	537;557;564;593	0	145.89	By MS/MS	By MS/MS	1.7	38.7	199630000	0	199630000	0	197690000	1	33	34				270	225;3530;4724;6799;8571;8572;10641;13949;14821;16636;17122;19095;19995;19996;20277;21813	True;True;True;True;True;True;True;True;True;True;True;True;True;True;True;True	248;3804;5097;7329;9241;9242;11452;11453;14989;16209;18174;18694;20819;21787;21788;22093;22094;23774	643;9515;9516;9517;9518;12607;12608;12609;12610;18022;18023;18024;22832;22833;28484;28485;28486;37814;40740;40741;45753;47073;47074;52515;52516;52517;52518;55005;55006;55007;55824;55825;55826;55827;60353;60354	667;9295;9296;9297;12389;12390;12391;12392;12393;17686;17687;22418;22419;22420;28441;28442;28443;37917;40938;45934;47279;52843;52844;52845;52846;55388;55389;55390;55391;56209;56210;56211;56212;60542;60543	667;9296;12393;17687;22418;22419;28442;37917;40938;45934;47279;52845;55388;55391;56211;60543	152;153	206;233
Q9UBL6	CPNE7	Copine-7 OS=Homo sapiens GN=CPNE7 PE=2 SV=1	Copine-7	3	2	2	1	3	2	2	1	3	0	2	0	2	6.3	4.9	4.9	70.293	633	633	0.00075959	13.082	By matching	By MS/MS	1.4	6.3	1980600	0	1980600	0	1980600	0	3	3				2622	3530;7374;21388	False;True;True	3804;7953;23311	9515;9516;9517;9518;19638;59082;59083	9295;9296;9297;19347;59210;59211	9296;19347;59210
P36551	CPOX	Oxygen-dependent coproporphyrinogen-III oxidase, mitochondrial OS=Homo sapiens GN=CPOX PE=1 SV=3	Oxygen-dependent coproporphyrinogen-III oxidase, mitochondrial	5	5	5	1	5	5	5	0	5	0	5	0	5	16.7	16.7	16.7	50.151	454	454	0	33.842		By MS/MS	0	16.7	9372300	0	9372300	0	9372300	0	7	7				972	984;2173;5209;8994;22029	True;True;True;True;True	1066;2346;5622;9691;23999	2714;2715;5901;5902;13809;24046;60911;60912	2666;5798;5799;13577;23644;61068;61069	2666;5798;13577;23644;61069
Q9BRF8	CPPED1	Serine/threonine-protein phosphatase CPPED1 OS=Homo sapiens GN=CPPED1 PE=1 SV=3	Serine/threonine-protein phosphatase CPPED1	5	5	5	1	5	5	5	0	5	0	5	0	5	26.4	26.4	26.4	35.548	314	314	0	54.564		By MS/MS	0	26.4	29324000	0	29324000	0	29324000	0	8	8				2324	1134;2461;13554;15957;16898	True;True;True;True;True	1235;2658;14568;17443;18455	3141;6702;36577;36578;43953;46436;46437	3078;6546;36593;36594;44291;44292;46590;46591	3078;6546;36593;44292;46591
Q9Y646	CPQ	Carboxypeptidase Q OS=Homo sapiens GN=CPQ PE=1 SV=1	Carboxypeptidase Q	4	4	4	1	4	4	4	0	4	0	4	0	4	14.2	14.2	14.2	51.887	472	472	0	37.355		By MS/MS	0	14.2	11676000	0	11676000	0	11676000	0	7	7				2817	1111;1141;18407;19898	True;True;True;True	1209;1243;20077;21683	3068;3155;3156;50427;50428;54764	3016;3089;3090;50547;55191;55192;55193	3016;3089;50547;55192
Q16630	CPSF6	Cleavage and polyadenylation specificity factor subunit 6 OS=Homo sapiens GN=CPSF6 PE=1 SV=2	Cleavage and polyadenylation specificity factor subunit 6	2	2	2	1	2	2	2	0	2	0	2	0	2	7.1	7.1	7.1	59.209	551	551	0.00041186	15.939		By MS/MS	0	7.1	2629300	0	2629300	0	2629300	0	3	3				1763	2382;7780	True;True	2576;8388	6479;20752	6335;6336;20503	6335;20503
Q8N684	CPSF7	Cleavage and polyadenylation specificity factor subunit 7 OS=Homo sapiens GN=CPSF7 PE=1 SV=1	Cleavage and polyadenylation specificity factor subunit 7	2	2	2	1	2	2	2	0	2	0	2	0	2	8.5	8.5	8.5	52.049	471	471	0	35.278		By MS/MS	0	8.5	1968300	0	1968300	0	1968300	0	2	2				2033	2387;8885	True;True	2581;9573	6489;6490;23719	6347;23302	6347;23302
P50416	CPT1A	Carnitine O-palmitoyltransferase 1, liver isoform OS=Homo sapiens GN=CPT1A PE=1 SV=2	Carnitine O-palmitoyltransferase 1, liver isoform	6	6	6	1	6	6	6	1	6	1	6	1	6	9.6	9.6	9.6	88.367	773	773	0	38.566	By matching	By MS/MS	1.3	9.6	15538000	25160	15513000	0	15513000	0	7	7				1133	7586;12688;17056;17199;19221;22541	True;True;True;True;True;True	8182;13633;18622;18776;20953;24543	20174;20175;34167;34168;46921;46922;47281;52865;62201;62202	19840;19841;34240;34241;47137;47473;53158;62327	19840;34240;47137;47473;53158;62327
P23786	CPT2	Carnitine O-palmitoyltransferase 2, mitochondrial OS=Homo sapiens GN=CPT2 PE=1 SV=2	Carnitine O-palmitoyltransferase 2, mitochondrial	6	6	6	1	6	6	6	0	6	0	6	0	6	16.6	16.6	16.6	73.776	658	658	0	56.58		By MS/MS	0	16.6	38994000	0	38994000	0	38994000	0	7	7				818	1282;4249;5625;8352;13453;16754	True;True;True;True;True;True	1394;4596;6064;9002;14461;18304	3552;11419;11420;14943;22261;36342;46094;46095	3444;11219;11220;14671;14672;21886;36394;46278	3444;11220;14672;21886;36394;46278
Q66K79	CPZ	Carboxypeptidase Z OS=Homo sapiens GN=CPZ PE=1 SV=2	Carboxypeptidase Z	5	5	5	1	5	5	5	0	5	0	5	0	5	10.6	10.6	10.6	73.655	652	652	0	32.72		By MS/MS	0	10.6	21481000	0	21481000	0	21481000	0	4	4				1866	4870;12668;15786;19008;20157	True;True;True;True;True	5257;13613;17255;20723;21963	12998;34123;43413;52253;52254;55503;55504	12786;34207;43766;52542;55931	12786;34207;43766;52542;55931
P29373	CRABP2	Cellular retinoic acid-binding protein 2 OS=Homo sapiens GN=CRABP2 PE=1 SV=2	Cellular retinoic acid-binding protein 2	8;1	8;1	8;1	2	8	8	8	3	8	3	8	3	8	60.9	60.9	60.9	15.693	138	138;137	0	144.56	By MS/MS	By MS/MS	26.1	60.9	148610000	141650	148470000	508990	144410000	1	21	22				875	5752;9495;15832;17267;19653;20508;20509;20940	True;True;True;True;True;True;True;True	6199;10227;17305;18847;21419;22344;22345;22817;22818	15228;15229;25256;25257;25258;25259;25260;25261;25262;43540;43541;47442;47443;47444;54095;54096;56481;56482;56483;56484;56485;56486;56487;56488;56489;57811;57812;57813;57814	14924;14925;25077;25078;25079;25080;25081;43880;47623;47624;54428;56825;56826;56827;56828;56829;56830;56831;56832;56833;58055;58056	14925;25078;43880;47623;54428;56828;56832;58056	1004	28
P43155	CRAT	Carnitine O-acetyltransferase OS=Homo sapiens GN=CRAT PE=1 SV=5	Carnitine O-acetyltransferase	7	7	7	1	7	7	7	0	7	0	7	0	7	13.6	13.6	13.6	70.857	626	626	0	57.493		By MS/MS	0	13.6	8975600	0	8975600	0	8975600	0	11	11				1038	1457;10969;12407;16006;16040;16418;16995	True;True;True;True;True;True;True	1577;11803;13334;17494;17535;17933;18555	4037;29421;29422;33386;44087;44189;45181;46712;46713	3899;29385;33535;33536;44426;44535;45444;45445;46860;46861;46862	3899;29385;33536;44426;44535;45444;46861
Q96HD1	CRELD1	Cysteine-rich with EGF-like domain protein 1 OS=Homo sapiens GN=CRELD1 PE=1 SV=3	Cysteine-rich with EGF-like domain protein 1	2	2	2	1	2	2	2	0	2	0	2	0	2	6.7	6.7	6.7	45.439	420	420	0	57.839		By MS/MS	0	6.7	3103600	0	3103600	0	3103600	0	2	2				2222	3902;13739	True;True	4217;14766	10507;37186	10278;37289	10278;37289
P52943	CRIP2	Cysteine-rich protein 2 OS=Homo sapiens GN=CRIP2 PE=1 SV=1	Cysteine-rich protein 2	3	3	3	1	3	3	3	1	3	1	3	1	3	32.2	32.2	32.2	22.492	208	208	0	34.515	By matching	By MS/MS	9.1	32.2	32862000	29882	32832000	0	32832000	0	6	6				1188	2024;8812;8819	True;True;True	2187;9498;9505	5502;5503;23496;23497;23518;23519	5417;5418;23047;23048;23049;23071	5417;23048;23071
P46108	CRK	Adapter molecule crk OS=Homo sapiens GN=CRK PE=1 SV=2	Adapter molecule crk	8	8	8	1	8	8	8	3	6	3	6	3	6	36.2	36.2	36.2	33.83	304	304	0	61.813	By MS/MS	By MS/MS	14.8	25	55724000	294690	55430000	0	55430000	3	11	14				1055	918;1324;4243;9875;9987;12602;16052;18637	True;True;True;True;True;True;True;True	997;1440;4589;10621;10740;13541;17547;20321	2551;3669;11391;26338;26339;26340;26341;26620;26621;26622;26623;33929;44221;44222;44223;44224;44225;51173	2518;3550;11190;11191;26326;26327;26328;26585;26586;26587;34036;44558;44559;51354	2518;3550;11191;26326;26587;34036;44558;51354
P46109	CRKL	Crk-like protein OS=Homo sapiens GN=CRKL PE=1 SV=1	Crk-like protein	5	5	5	1	5	5	5	1	5	1	5	1	5	28.7	28.7	28.7	33.777	303	303	0	45.763	By matching	By MS/MS	4	28.7	55808000	10838	55797000	0	55797000	0	7	7				1056	4242;9874;9986;18636;22710	True;True;True;True;True	4588;10620;10739;20320;24731	11390;26336;26337;26617;26618;26619;51170;51171;51172;62700;62701	11189;26324;26325;26583;26584;51352;51353;62848	11189;26325;26584;51353;62848
Q8IUI8	CRLF3	Cytokine receptor-like factor 3 OS=Homo sapiens GN=CRLF3 PE=1 SV=2	Cytokine receptor-like factor 3	2	2	2	1	2	2	2	0	2	0	2	0	2	8.1	8.1	8.1	49.765	442	442	0.0007767	13.628		By MS/MS	0	8.1	15189000	0	15189000	0	15189000	0	1	1				1988	13868;14879	True;True	14903;16270	37580;37581;40872	37673;41058	37673;41058
O75718	CRTAP	Cartilage-associated protein OS=Homo sapiens GN=CRTAP PE=1 SV=1	Cartilage-associated protein	7	7	7	1	7	7	7	1	7	1	7	1	7	20.9	20.9	20.9	46.561	401	401	0	52.487	By matching	By MS/MS	2	20.9	45383000	60824	45323000	0	42796000	0	13	13				300	1044;3093;4157;5858;6939;18550;21155	True;True;True;True;True;True;True	1136;3332;3333;4495;6324;6325;7477;20228;23054;23055	2876;8361;8362;8363;11185;11186;15529;15530;15531;15532;15533;18386;18387;50843;50844;50845;50846;58433;58434	2842;8226;8227;8228;10973;15218;15219;15220;15221;18063;50970;58614;58615	2842;8227;10973;15220;18063;50970;58615	171;172;173	42;331;380
P02511	CRYAB	Alpha-crystallin B chain OS=Homo sapiens GN=CRYAB PE=1 SV=2	Alpha-crystallin B chain	6	6	6	1	6	6	6	1	6	1	6	1	6	41.7	41.7	41.7	20.159	175	175	0	39.211	By matching	By MS/MS	6.3	41.7	115700000	21401	115680000	0	115020000	0	11	11				420	7189;9071;10411;14087;15999;20919	True;True;True;True;True;True	7756;9771;11203;15164;17487;22793	19078;19079;24219;27830;27831;38214;38215;44071;44072;44073;57758;57759	18741;18742;23868;27768;27769;38303;38304;44411;44412;44413;58020	18741;23868;27768;38304;44413;58020
Q9Y2S2	CRYL1	Lambda-crystallin homolog OS=Homo sapiens GN=CRYL1 PE=1 SV=3	Lambda-crystallin homolog	2	2	2	1	2	2	2	0	2	0	2	0	2	6.6	6.6	6.6	35.419	319	319	0.0007622	13.206		By MS/MS	0	6.6	1720200	0	1720200	0	1720200	0	3	3				2751	13319;13932	True;True	14323;14972	35973;37762	35998;37864;37865	35998;37865
Q08257	CRYZ	Quinone oxidoreductase OS=Homo sapiens GN=CRYZ PE=1 SV=1	Quinone oxidoreductase	7	7	7	1	7	7	7	0	7	0	7	0	7	38.9	38.9	38.9	35.206	329	329	0	55.283		By MS/MS	0	38.9	135220000	0	135220000	0	135220000	0	9	9				1507	850;10203;11301;16145;19933;20411;20473	True;True;True;True;True;True;True	920;10964;12156;17646;21721;22237;22305	2341;27244;27245;30295;30296;44472;44473;54853;56217;56218;56219;56382;56383	2326;27152;30188;30189;44819;55263;56583;56731;56732	2326;27152;30189;44819;55263;56583;56732
O75390	CS	Citrate synthase, mitochondrial OS=Homo sapiens GN=CS PE=1 SV=2	Citrate synthase, mitochondrial	7	7	7	1	7	7	7	3	7	3	7	3	7	22.1	22.1	22.1	51.712	466	466	0	46.245	By matching	By MS/MS	7.5	22.1	136710000	69056	136640000	278850	117380000	0	10	10				282	174;1334;3472;4571;7848;8298;10897	True;True;True;True;True;True;True	188;189;1450;3744;4932;8460;8937;11726	485;486;3693;3694;3695;3696;9367;9368;9369;12179;20903;22107;22108;29170;29171;29172;29173	508;509;3567;9146;9147;9148;11960;20627;21750;29118	508;3567;9146;11960;20627;21750;29118	163	154
O75534	CSDE1	Cold shock domain-containing protein E1 OS=Homo sapiens GN=CSDE1 PE=1 SV=2	Cold shock domain-containing protein E1	13	13	13	1	13	13	13	0	13	0	13	0	13	18.5	18.5	18.5	88.884	798	798	0	148.86		By MS/MS	0	18.5	45348000	0	45348000	0	45348000	0	14	14				292	2158;3901;4070;4071;4404;4405;4652;5373;5470;7593;12856;20497;21646	True;True;True;True;True;True;True;True;True;True;True;True;True	2330;4216;4402;4403;4758;4759;5019;5801;5902;8189;13812;22333;23585	5863;5864;5865;10506;10962;10963;11799;11800;11801;12398;14258;14563;20187;34634;56460;59837	5764;5765;10277;10741;10742;11587;11588;12189;13991;14324;19850;34682;56807;60014	5764;10277;10741;10742;11587;11588;12189;13991;14324;19850;34682;56807;60014
P55060	CSE1L	Exportin-2 OS=Homo sapiens GN=CSE1L PE=1 SV=3	Exportin-2	12	12	12	1	12	12	12	1	12	1	12	1	12	19.1	19.1	19.1	110.42	971	971	0	323.31	By MS/MS	By MS/MS	1	19.1	70813000	30080	70783000	0	68631000	1	22	23				1224	76;2785;3640;6710;6898;9095;12846;14199;15179;16979;18070;22248	True;True;True;True;True;True;True;True;True;True;True;True	84;3004;3919;7236;7433;9797;13801;15337;15338;16587;18539;19722;24237	221;222;223;7580;7581;9781;9782;9783;9784;17754;18297;18298;18299;24259;34608;38614;38615;41613;41614;46672;49526;61464	262;263;264;7441;9526;9527;9528;9529;17405;17406;17978;17979;17980;23919;34666;38714;38715;41797;41798;41799;46830;49673;61625	262;7441;9529;17405;17980;23919;34666;38715;41797;46830;49673;61625	1400	1
P41240	CSK	Tyrosine-protein kinase CSK OS=Homo sapiens GN=CSK PE=1 SV=1	Tyrosine-protein kinase CSK	8	8	8	1	8	8	8	0	8	0	8	0	8	24.7	24.7	24.7	50.704	450	450	0	51.728		By MS/MS	0	24.7	25455000	0	25455000	0	25455000	0	8	8				1012	7696;7924;8592;9298;14837;16956;21136;22665	True;True;True;True;True;True;True;True	8296;8544;9262;10016;16226;18516;23023;24679	20531;20532;21103;22879;22880;24741;40782;46599;46600;58334;58335;62540	20305;20810;22460;24499;40977;46761;58539;58540;62664	20305;20810;22460;24499;40977;46761;58540;62664
P48729	CSNK1A1	Casein kinase I isoform alpha OS=Homo sapiens GN=CSNK1A1 PE=1 SV=2	Casein kinase I isoform alpha	2	2	2	1	2	2	2	0	2	0	2	0	2	7.4	7.4	7.4	38.914	337	337	0.0007533	12.902		By MS/MS	0	7.4	4090100	0	4090100	0	4090100	0	3	3				1091	3469;10269	True;True	3741;11036	9363;27431	9141;9142;27381	9141;27381	1270	144
Q9Y6M4	CSNK1G3	Casein kinase I isoform gamma-3 OS=Homo sapiens GN=CSNK1G3 PE=1 SV=2;Casein kinase I isoform gamma-2 OS=Homo sapiens GN=CSNK1G2 PE=1 SV=1;Casein kinase I isoform gamma-1 OS=Homo sapiens GN=CSNK1G1 PE=1 SV=1	Casein kinase I isoform gamma-3;Casein kinase I isoform gamma-2;Casein kinase I isoform gamma-1	2;1;1	2;1;1	2;1;1	3	2	2	2	0	2	0	2	0	2	6.5	6.5	6.5	51.388	447	447;415;422	0.0017838	11.209		By MS/MS	0	6.5	3675900	0	3675900	0	3675900	0	2	2				2835	16389;22652	True;True	17904;24665	45116;62501	45391;62621	45391;62621
P68400	CSNK2A1	Casein kinase II subunit alpha OS=Homo sapiens GN=CSNK2A1 PE=1 SV=1;Casein kinase II subunit alpha 3 OS=Homo sapiens GN=CSNK2A3 PE=1 SV=2	Casein kinase II subunit alpha;Casein kinase II subunit alpha 3	13;10	13;10	13;10	2	13	13	13	5	13	5	13	5	13	40.4	40.4	40.4	45.143	391	391;391	0	133.08	By MS/MS	By MS/MS	14.3	40.4	331180000	6172600	325000000	37589000	293560000	12	24	36				1392	4751;6513;6996;7281;7939;7940;11110;12403;17464;20935;20936;22672;22780	True;True;True;True;True;True;True;True;True;True;True;True;True	5126;7026;7548;7852;8559;8560;11959;13330;19061;22812;22813;24686;24803	12686;12687;17180;17181;18560;18561;18562;18563;19353;19354;21134;21135;21136;21137;21138;21139;21140;29835;33378;33379;47926;57797;57798;57799;57800;57801;57802;57803;62551;62552;62553;62554;62988;62989;62990;62991;62992;62993;62994;62995;62996;62997	12468;16809;16810;16811;18223;18224;18225;18226;19044;19045;20837;20838;20839;20840;20841;20842;29779;33526;33527;33528;48095;58045;58046;58047;58048;62679;62680;62681;63261;63262;63263;63264;63265;63266;63267;63268	12468;16810;18223;19045;20839;20842;29779;33527;48095;58046;58048;62680;63268
P19784	CSNK2A2	Casein kinase II subunit alpha OS=Homo sapiens GN=CSNK2A2 PE=1 SV=1	Casein kinase II subunit alpha	11	11	11	1	11	11	11	4	11	4	11	4	11	48	48	48	41.213	350	350	0	160.16	By MS/MS	By MS/MS	13.4	48	135600000	760040	134840000	2277900	133310000	6	18	24				754	4428;5924;6045;6512;9211;12401;12402;20937;21916;22464;22781	True;True;True;True;True;True;True;True;True;True;True	4783;6395;6524;7025;9921;13328;13329;22814;23883;24461;24804	11842;11843;15703;15994;15995;17179;24531;33374;33375;33376;33377;57804;57805;57806;57807;60620;60621;60622;61988;62998;62999;63000;63001;63002;63003;63004	11624;11625;11626;15410;15671;15672;15673;16808;24291;33523;33524;33525;58049;58050;58051;60775;60776;62113;63269;63270;63271;63272;63273;63274	11625;15410;15671;16808;24291;33524;33525;58050;60776;62113;63273
P67870	CSNK2B	Casein kinase II subunit beta OS=Homo sapiens GN=CSNK2B PE=1 SV=1	Casein kinase II subunit beta	7	7	7	1	7	7	7	3	7	3	7	3	7	44.7	44.7	44.7	24.942	215	215	0	111.59	By MS/MS	By MS/MS	16.3	44.7	260950000	1173600	259780000	4406400	228120000	6	19	25				1384	2669;7009;8020;8344;18249;21920;22749	True;True;True;True;True;True;True	2875;7561;8642;8643;8993;19914;23887;23888;24771	7205;7206;18590;21346;21347;21348;21349;21350;22237;22238;22239;22240;22241;49966;49967;60630;60631;60632;60633;60634;60635;60636;60637;60638;62892;62893;62894;62895;62896	7061;18249;21028;21029;21030;21866;21867;21868;21869;21870;50093;60781;60782;60783;60784;60785;60786;60787;60788;60789;63168;63169;63170;63171;63172	7061;18249;21030;21868;50093;60785;63172	1592;1593;1594	97;119;132
Q6UVK1	CSPG4	Chondroitin sulfate proteoglycan 4 OS=Homo sapiens GN=CSPG4 PE=1 SV=2	Chondroitin sulfate proteoglycan 4	35	35	35	1	35	35	35	0	35	0	35	0	35	23.7	23.7	23.7	250.53	2322	2322	0	323.31		By MS/MS	0	23.7	348490000	0	348490000	0	348490000	0	57	57				1908	1019;1809;1911;2020;3713;4088;4453;5565;7236;7444;7931;8585;8607;9372;10789;11919;13349;13351;13785;13900;14661;16153;17372;17397;18006;18115;18220;18299;18875;19689;19984;21460;21482;21620;21853	True;True;True;True;True;True;True;True;True;True;True;True;True;True;True;True;True;True;True;True;True;True;True;True;True;True;True;True;True;True;True;True;True;True;True	1105;1961;2071;2183;3994;4422;4809;6002;7805;8031;8551;9255;9280;10096;11610;12814;14356;14358;14816;14940;16010;17654;18959;18991;19655;19770;19880;19964;20581;21460;21776;23389;23411;23558;23815	2809;4958;4959;4960;4961;4962;4963;5252;5253;5493;5494;9950;11010;11898;11899;14777;14778;19247;19820;19821;21115;22864;22865;22930;22931;22932;22933;24895;28888;28889;28890;28891;32040;32041;36059;36062;36063;37318;37319;37702;40201;40202;44492;47675;47784;49372;49373;49374;49650;49882;49883;49884;50099;50100;51865;51866;54218;54219;54983;54984;59264;59265;59266;59327;59716;59717;60450;60451	2772;4853;4854;4855;4856;4857;5182;5410;5411;9671;9672;10794;11677;14509;14510;14511;18948;19542;19543;20817;22448;22513;22514;22515;24676;28827;28828;32039;32040;36120;36123;37428;37804;37805;40427;44835;47832;47941;49530;49531;49796;49993;49994;50218;50219;52119;52120;54560;54561;55369;59376;59377;59378;59452;59833;59834;60616	2772;4854;5182;5411;9671;10794;11677;14509;18948;19542;20817;22448;22514;24676;28828;32040;36120;36123;37428;37804;40427;44835;47832;47941;49531;49796;49993;50219;52119;54560;55369;59377;59452;59833;60616
P21291	CSRP1	Cysteine and glycine-rich protein 1 OS=Homo sapiens GN=CSRP1 PE=1 SV=3	Cysteine and glycine-rich protein 1	6	6	6	1	6	6	6	2	6	2	6	2	6	45.6	45.6	45.6	20.567	193	193	0	78.701	By MS/MS	By MS/MS	19.2	45.6	74838000	193270	74645000	300430	74538000	2	13	15				778	7802;8178;8921;8922;15170;19854	True;True;True;True;True;True	8412;8812;9612;9613;16578;21634	20808;20809;20810;20811;21786;21787;21788;23819;23820;23821;23822;23823;23824;41589;54660;54661	20549;20550;20551;20552;21483;21484;21485;21486;23392;23393;23394;41772;41773;55049;55050	20552;21485;23392;23393;41772;55050
Q16527	CSRP2	Cysteine and glycine-rich protein 2 OS=Homo sapiens GN=CSRP2 PE=1 SV=3	Cysteine and glycine-rich protein 2	4	4	4	1	4	4	4	0	4	0	4	0	4	29.5	29.5	29.5	20.954	193	193	0	99.595		By MS/MS	0	29.5	28655000	0	28655000	0	28288000	0	12	12				1753	7819;8920;15169;17716	True;True;True;True	8429;9610;9611;16577;19340	20840;20841;20842;23813;23814;23815;23816;23817;23818;41587;41588;48595;48596	20576;20577;20578;20579;23387;23388;23389;23390;23391;41770;41771;48794	20579;23389;41771;48794	1912	82
P01040	CSTA	Cystatin-A OS=Homo sapiens GN=CSTA PE=1 SV=1	Cystatin-A;Cystatin-A, N-terminally processed	2	2	2	1	2	2	2	2	0	2	0	2	0	30.6	30.6	30.6	11.006	98	98	0.0007215	11.666	By MS/MS		30.6	0	323850	323850	0	323850	0	2	0	2				413	17808;19533	True;True	19437;21294	48821;53798	48987;54097	48987;54097
P04080	CSTB	Cystatin-B OS=Homo sapiens GN=CSTB PE=1 SV=2	Cystatin-B	5	5	5	1	5	5	5	1	5	1	5	1	5	79.6	79.6	79.6	11.139	98	98	0	39.772	By MS/MS	By MS/MS	12.2	79.6	233770000	811630	232950000	0	225720000	2	14	16				429	1194;14459;18116;20459;20661	True;True;True;True;True	1299;15709;15710;15711;19771;22291;22504	3274;3275;39426;39427;39428;39429;39430;39431;49651;49652;49653;49654;49655;49656;56353;56910;56911;56912	3198;39537;39538;39539;39540;39541;49797;49798;49799;49800;56702;57238;57239;57240;57241;57242	3198;39541;49800;56702;57240	262;263	1;2
Q13363	CTBP1	C-terminal-binding protein 1 OS=Homo sapiens GN=CTBP1 PE=1 SV=2	C-terminal-binding protein 1	5	5	3	1	5	5	3	0	5	0	5	0	3	15.9	15.9	11.6	47.535	440	440	0	38.864		By MS/MS	0	15.9	13105000	0	13105000	0	13105000	0	6	6				1574	2962;15820;16146;16935;20576	True;True;True;True;True	3192;17289;17647;18493;22416	8051;43491;43492;44474;44475;46547;56704;56705	7896;43836;43837;44820;46718;57045	7896;43836;44820;46718;57045
P56545	CTBP2	C-terminal-binding protein 2 OS=Homo sapiens GN=CTBP2 PE=1 SV=1	C-terminal-binding protein 2	4	2	2	1	4	2	2	1	4	1	2	1	2	11.2	7	7	48.944	445	445	0.00074488	12.649	By MS/MS	By MS/MS	2.5	11.2	54906000	3500500	51405000	0	50048000	1	1	2				1243	2962;7381;7758;15820	False;True;True;False	3192;7961;8364;17289	8051;19658;19659;20701;20702;20703;20704;20705;20706;20707;43491;43492	7896;19374;20455;20456;43836;43837	7896;19374;20455;43836
Q9GZU7	CTDSP1	Carboxy-terminal domain RNA polymerase II polypeptide A small phosphatase 1 OS=Homo sapiens GN=CTDSP1 PE=1 SV=1	Carboxy-terminal domain RNA polymerase II polypeptide A small phosphatase 1	2	2	2	1	2	2	2	0	2	0	2	0	2	8	8	8	29.203	261	261	0.00079523	14.269		By MS/MS	0	8	705170	0	705170	0	556160	0	3	3				2397	14113;20146	True;True	15204;15205;21951	38298;38299;55474	38387;38388;55905	38387;55905	2147	1
P35221	CTNNA1	Catenin alpha-1 OS=Homo sapiens GN=CTNNA1 PE=1 SV=1	Catenin alpha-1	27	27	23	1	27	27	23	0	27	0	27	0	23	47	47	41.7	100.07	906	906	0	323.31		By MS/MS	0	47	383170000	0	383170000	0	341410000	0	54	54				944	41;705;1042;2355;5042;6135;6136;9436;11984;12412;12642;12836;14576;14616;14764;15584;15657;16246;16399;17066;18063;18685;19636;20714;20790;21068;22001	True;True;True;True;True;True;True;True;True;True;True;True;True;True;True;True;True;True;True;True;True;True;True;True;True;True;True	44;764;1134;2547;2548;5441;6621;6622;10163;12882;13339;13587;13791;15891;15948;16143;17037;17115;17755;17914;18632;19715;20377;21402;22565;22566;22655;22951;23970	125;126;1939;1940;1941;2871;2872;6426;6427;13409;16207;16208;25089;32178;32179;33399;33400;33401;33402;34057;34576;34577;39910;39911;40060;40552;42881;43062;44692;44693;45136;45137;46946;49515;51345;51346;54058;57084;57085;57086;57087;57088;57357;58149;58150;60845;60846	135;136;137;1944;1945;1946;2837;2838;6287;6288;13196;15876;15877;15878;24929;32172;33543;33544;33545;34147;34640;40131;40132;40133;40268;40752;40753;40754;43242;43435;43436;45012;45013;45408;45409;47158;47159;49663;51516;54391;57410;57411;57412;57413;57414;57415;57416;57417;57661;58357;58358;58359;61021;61022	137;1946;2837;6288;13196;15876;15877;24929;32172;33544;34147;34640;40131;40268;40753;43242;43436;45013;45408;47159;49663;51516;54391;57414;57661;58358;61021	1070;1071;1072	1;387;560
P35222	CTNNB1	Catenin beta-1 OS=Homo sapiens GN=CTNNB1 PE=1 SV=1	Catenin beta-1	12;1	12;1	12;1	2	12	12	12	1	12	1	12	1	12	22.2	22.2	22.2	85.496	781	781;745	0	133.23	By matching	By MS/MS	2.8	22.2	73055000	42486	73013000	0	71504000	0	19	19				945	841;4613;8248;8991;12367;12774;13837;14166;14924;17430;19348;19599	True;True;True;True;True;True;True;True;True;True;True;True	911;4978;8885;9688;13292;13727;14870;15288;16319;19024;21097;21364;21365	2325;2326;2327;12282;12283;12284;21987;21988;21989;21990;24036;24037;33282;34410;34411;37473;37474;38488;38489;40984;47854;47855;53266;53973;53974	2311;2312;12065;12066;12067;21650;21651;21652;23634;23635;33451;34479;34480;37561;38573;41171;48025;53598;54310;54311	2311;12066;21652;23634;33451;34479;37561;38573;41171;48025;53598;54310	1073	553
O60716	CTNND1	Catenin delta-1 OS=Homo sapiens GN=CTNND1 PE=1 SV=1	Catenin delta-1	9	9	9	1	9	9	9	0	9	0	9	0	9	14.9	14.9	14.9	108.17	968	968	0	69.228		By MS/MS	0	14.9	65887000	0	65887000	0	65887000	0	13	13				250	1475;3851;8901;9392;11297;14813;17691;18102;22720	True;True;True;True;True;True;True;True;True	1596;4149;9589;10118;12152;16200;19314;19757;24741	4080;4081;10344;10345;23764;23765;23766;24991;30291;40724;40725;48532;49627;62769;62770;62771;62772	3941;10134;10135;23342;23343;24829;30184;40923;48740;49766;63018;63019;63020;63021	3941;10135;23342;24829;30184;40923;48740;49766;63020
P17812	CTPS1	CTP synthase 1 OS=Homo sapiens GN=CTPS1 PE=1 SV=2	CTP synthase 1	10	10	9	1	10	10	9	1	10	1	10	1	9	24.2	24.2	22.2	66.69	591	591	0	78.049	By matching	By MS/MS	1.7	24.2	48008000	31577	47976000	0	47976000	0	11	11				729	1296;2733;7116;7277;8199;10651;17479;19830;21303;22482	True;True;True;True;True;True;True;True;True;True	1410;2947;7678;7847;8834;11465;19078;21609;23221;24481	3592;7438;7439;18898;18899;18900;19342;19343;21851;28517;47958;54598;58858;62044;62045	3484;7316;18577;19035;21532;28470;48124;54985;58993;62181;62182	3484;7316;18577;19035;21532;28470;48124;54985;58993;62181
P10619	CTSA	Lysosomal protective protein OS=Homo sapiens GN=CTSA PE=1 SV=2	Lysosomal protective protein;Lysosomal protective protein 32 kDa chain;Lysosomal protective protein 20 kDa chain	2	2	2	1	2	2	2	0	2	0	2	0	2	5.4	5.4	5.4	54.465	480	480	0.00040984	15.669		By MS/MS	0	5.4	10039000	0	10039000	0	10039000	0	2	2				565	3627;22391	True;True	3905;24384	9755;61824;61825	9503;61959	9503;61959
P07858	CTSB	Cathepsin B OS=Homo sapiens GN=CTSB PE=1 SV=3	Cathepsin B;Cathepsin B light chain;Cathepsin B heavy chain	5	5	5	1	5	5	5	0	5	0	5	0	5	20.6	20.6	20.6	37.821	339	339	0	46.21		By MS/MS	0	20.6	43653000	0	43653000	0	39389000	0	6	6				494	6061;8441;9398;9525;17501	True;True;True;True;True	6540;9100;10124;10258;19104;19105	16032;16033;22509;25003;25004;25344;25345;48022;48023	15714;22129;24847;25187;25188;48209;48210	15714;22129;24847;25187;48209	409	274
P53634	CTSC	Dipeptidyl peptidase 1 OS=Homo sapiens GN=CTSC PE=1 SV=2	Dipeptidyl peptidase 1;Dipeptidyl peptidase 1 exclusion domain chain;Dipeptidyl peptidase 1 heavy chain;Dipeptidyl peptidase 1 light chain	3	3	3	1	3	3	3	0	3	0	3	0	3	11.2	11.2	11.2	51.853	463	463	0	25.879		By MS/MS	0	11.2	11080000	0	11080000	0	11080000	0	4	4				1200	8640;10207;22962	True;True;True	9315;10968;24993	23017;23018;27252;63439	22591;22592;27159;63694	22591;27159;63694
P07339	CTSD	Cathepsin D OS=Homo sapiens GN=CTSD PE=1 SV=1	Cathepsin D;Cathepsin D light chain;Cathepsin D heavy chain	10	10	10	1	10	10	10	2	10	2	10	2	10	35.7	35.7	35.7	44.552	412	412	0	121.04	By matching	By MS/MS	4.1	35.7	152030000	64692	151970000	90136	144770000	0	22	22				484	1089;2523;3982;5172;10694;13454;16671;21555;22809;22966	True;True;True;True;True;True;True;True;True;True	1185;1186;2724;4306;4307;5580;11511;14462;18214;23491;24833;24998	3007;3008;3009;3010;6893;10732;10733;10734;10735;10736;10737;13718;13719;13720;28640;28641;28642;28643;28644;36343;36344;45865;59526;59527;59528;59529;63064;63065;63450;63451;63452	2963;2964;2965;6755;6756;10509;10510;10511;10512;10513;10514;13494;13495;28593;28594;28595;28596;36395;46044;59660;59661;63339;63705	2964;6756;10512;13495;28594;36395;46044;59661;63339;63705	382;383	246;326
P43235	CTSK	Cathepsin K OS=Homo sapiens GN=CTSK PE=1 SV=1	Cathepsin K	2	2	2	1	2	2	2	0	2	0	2	0	2	15.2	15.2	15.2	36.966	329	329	0	29.159		By MS/MS	0	15.2	21305000	0	21305000	0	18514000	0	5	5				1039	8029;8869	True;True	8652;8653;9556	21367;21368;21369;23689;23690	21042;21043;21044;23273;23274	21044;23274	1209	211
Q9UBR2	CTSZ	Cathepsin Z OS=Homo sapiens GN=CTSZ PE=1 SV=1	Cathepsin Z	2	2	2	1	2	2	2	0	2	0	2	0	2	7.3	7.3	7.3	33.868	303	303	0.00072385	11.723		By MS/MS	0	7.3	2956900	0	2956900	0	2956900	0	2	2				2628	15546;15603	True;True	16995;17056	42773;42774;42917;42918	43118;43275	43118;43275
Q14247	CTTN	Src substrate cortactin OS=Homo sapiens GN=CTTN PE=1 SV=2	Src substrate cortactin	6	6	6	1	6	6	6	0	6	0	6	0	6	18.2	18.2	18.2	61.585	550	550	0	41.663		By MS/MS	0	18.2	39168000	0	39168000	0	39168000	0	9	9				1643	1887;6795;8430;19525;20229;22420	True;True;True;True;True;True	2045;7325;9086;9087;21286;22041;24416	5177;5178;18014;22476;22477;22478;53780;53781;55704;61893;61894	5085;17678;22094;22095;54076;54077;54078;56108;62031	5085;17678;22094;54078;56108;62031	1829	448
Q2VPK5	CTU2	Cytoplasmic tRNA 2-thiolation protein 2 OS=Homo sapiens GN=CTU2 PE=1 SV=1	Cytoplasmic tRNA 2-thiolation protein 2	2	2	2	1	2	2	2	0	2	0	2	0	2	6.6	6.6	6.6	56.107	515	515	0.00074934	12.78		By MS/MS	0	6.6	849240	0	849240	0	849240	0	2	2				1791	2717;2946	True;True	2931;3176	7413;8026	7294;7873	7294;7873
Q13616	CUL1	Cullin-1 OS=Homo sapiens GN=CUL1 PE=1 SV=2	Cullin-1	11	11	11	1	11	11	11	0	11	0	11	0	11	18.4	18.4	18.4	89.677	776	776	0	95.625		By MS/MS	0	18.4	16584000	0	16584000	0	16584000	0	14	14				1604	2608;6102;6155;6843;12708;12864;13761;14089;14268;21210;21432	True;True;True;True;True;True;True;True;True;True;True	2813;6584;6642;6643;7375;13655;13820;14792;15166;15439;23120;23358	7081;16136;16137;16240;16241;16242;18130;34217;34218;34683;37246;37247;38217;38831;58598;58599;59195;59196	6930;15811;15812;15910;15911;17812;34282;34781;37359;38306;38930;58759;58760;59318	6930;15812;15910;17812;34282;34781;37359;38306;38930;58759;59318	1765	261
Q13617	CUL2	Cullin-2 OS=Homo sapiens GN=CUL2 PE=1 SV=2	Cullin-2	4	4	4	1	4	4	4	0	4	0	4	0	4	5.5	5.5	5.5	86.982	745	745	0	25.939		By MS/MS	0	5.5	10332000	0	10332000	0	10332000	0	5	5				1605	4324;9223;13645;14729	True;True;True;True	4675;9936;14665;16105	11608;24567;36883;36884;40445	11417;24325;36919;36920;40650	11417;24325;36919;40650
Q13618	CUL3	Cullin-3 OS=Homo sapiens GN=CUL3 PE=1 SV=2	Cullin-3	6	6	6	1	6	6	6	0	6	0	6	0	6	12.6	12.6	12.6	88.929	768	768	0	72.462		By MS/MS	0	12.6	38740000	0	38740000	0	38740000	0	7	7				1606	1531;4893;16615;18819;21085;22850	True;True;True;True;True;True	1658;5280;18151;20520;22969;24876	4255;4256;13040;45669;45670;51738;58204;58205;63155	4125;12821;45869;45870;51981;58413;63414;63415	4125;12821;45870;51981;58413;63415
Q13620	CUL4B	Cullin-4B OS=Homo sapiens GN=CUL4B PE=1 SV=4	Cullin-4B	9	9	5	1	9	9	5	1	9	1	9	0	5	11.1	11.1	6.8	103.98	913	913	0	76.82	By matching	By MS/MS	1.1	11.1	36611000	18278	36593000	0	36593000	0	9	9				1607	3433;3544;4807;4938;6413;10394;12486;16769;19086	True;True;True;True;True;True;True;True;True	3703;3819;5188;5329;6920;11186;13421;18320;20810	9274;9275;9559;12821;13145;16933;27793;33614;33615;46131;46132;46133;52502	9051;9332;12620;12924;16603;27733;33767;46308;52831	9051;9332;12620;12924;16603;27733;33767;46308;52831
Q93034	CUL5	Cullin-5 OS=Homo sapiens GN=CUL5 PE=1 SV=4	Cullin-5	11	11	11	1	11	11	11	0	11	0	11	0	11	20	20	20	90.954	780	780	0	120.74		By MS/MS	0	20	34519000	0	34519000	0	34519000	0	14	14				2153	3111;3205;3636;5993;6226;10658;16690;19475;20478;20479;21465	True;True;True;True;True;True;True;True;True;True;True	3356;3457;3915;6467;6718;11472;18234;21233;22311;22312;23394	8418;8640;9772;15861;15862;16454;28526;45910;45911;53648;56398;56399;56400;56401;59285;59286	8275;8466;9516;9517;15540;16136;28478;46078;46079;53968;56749;56750;56751;56752;59411	8275;8466;9516;15540;16136;28478;46078;53968;56751;56752;59411	2026	779
O60888	CUTA	Protein CutA OS=Homo sapiens GN=CUTA PE=1 SV=2	Protein CutA	4	4	4	1	4	4	4	1	4	1	4	1	4	40.8	40.8	40.8	19.116	179	179	0	35.238	By MS/MS	By MS/MS	7.8	40.8	275560000	197550	275360000	0	272470000	1	11	12				261	8126;11441;18447;19518	True;True;True;True	8758;8759;12307;20119;21278	21665;21666;21667;21668;30617;50524;50525;50526;53757;53758;53759;53760;53761;53762;53763	21363;21364;21365;21366;30495;50634;50635;50636;50637;54060;54061;54062;54063	21363;30495;50634;54061	149	121
P39880	CUX1	Homeobox protein cut-like 1 OS=Homo sapiens GN=CUX1 PE=1 SV=3;Protein CASP OS=Homo sapiens GN=CUX1 PE=1 SV=2	Homeobox protein cut-like 1;Protein CASP	2;1	2;1	2;1	2	2	2	2	0	2	0	2	0	2	0.9	0.9	0.9	164.19	1505	1505;678	0.0045759	10.467		By MS/MS	0	0.9	41188000	0	41188000	0	41188000	0	2	2				997	11652;16330	True;True	12531;17841	31287;44946	31149;45240	31149;45240
P00167	CYB5A	Cytochrome b5 OS=Homo sapiens GN=CYB5A PE=1 SV=2	Cytochrome b5	4	4	4	1	4	4	4	1	4	1	4	1	4	38.8	38.8	38.8	15.33	134	134	0	70.185	By matching	By MS/MS	9.7	38.8	155360000	47671	155320000	0	112280000	0	12	12				394	670;5966;6889;22964	True;True;True;True	729;6439;7423;24995	1865;1866;15796;15797;15798;15799;15800;18254;18255;18256;18257;18258;18259;63442;63443	1869;1870;15487;15488;15489;15490;15491;15492;17948;17949;17950;63696	1869;15487;17948;63696
O43169	CYB5B	Cytochrome b5 type B OS=Homo sapiens GN=CYB5B PE=1 SV=2	Cytochrome b5 type B	3	3	3	1	3	3	3	1	3	1	3	1	3	44.5	44.5	44.5	16.332	146	146	0	41.541	By MS/MS	By MS/MS	8.2	44.5	209730000	155460	209580000	0	209580000	2	12	14				178	6930;8449;16778	True;True;True	7466;9109;18329	18360;18361;18362;18363;22529;22530;22531;22532;46146;46147;46148;46149	18041;18042;18043;18044;18045;22143;22144;22145;22146;22147;46318;46319;46320;46321	18043;22145;46320
Q9UHQ9	CYB5R1	NADH-cytochrome b5 reductase 1 OS=Homo sapiens GN=CYB5R1 PE=1 SV=1	NADH-cytochrome b5 reductase 1	3	3	3	1	3	3	3	0	3	0	3	0	3	10.2	10.2	10.2	34.094	305	305	0.00042088	17.084		By MS/MS	0	10.2	4407200	0	4407200	0	4407200	0	3	3				2655	3460;7866;20503	True;True;True	3732;8479;22339	9337;20951;56472;56473;56474	9110;20671;56816;56817	9110;20671;56817
Q6BCY4	CYB5R2	NADH-cytochrome b5 reductase 2 OS=Homo sapiens GN=CYB5R2 PE=1 SV=1	NADH-cytochrome b5 reductase 2	2	2	2	1	2	2	2	0	2	0	2	0	2	5.8	5.8	5.8	31.458	276	276	0.0024849	11.076		By MS/MS	0	5.8	1130800	0	1130800	0	1130800	0	2	2				1871	9615;9888	True;True	10353;10636	25579;26371	25399;26353	25399;26353
P00387	CYB5R3	NADH-cytochrome b5 reductase 3 OS=Homo sapiens GN=CYB5R3 PE=1 SV=3	NADH-cytochrome b5 reductase 3;NADH-cytochrome b5 reductase 3 membrane-bound form;NADH-cytochrome b5 reductase 3 soluble form	19	19	19	1	19	19	19	6	18	6	18	6	18	73.1	73.1	73.1	34.234	301	301	0	290.49	By MS/MS	By MS/MS	23.3	69.4	1662800000	1212100	1661600000	1173900	1489600000	5	64	69				399	1125;1675;3397;3478;3983;6544;6547;6867;7859;8421;9586;9587;9588;13924;14598;15906;18373;18374;18440	True;True;True;True;True;True;True;True;True;True;True;True;True;True;True;True;True;True;True	1224;1225;1821;1822;3666;3667;3750;4308;7058;7061;7399;8472;9075;10320;10321;10322;14964;15923;15924;15925;17386;20042;20043;20110;20111	3111;3112;4588;4589;4590;4591;4592;4593;4594;4595;4596;9167;9168;9169;9170;9171;9380;9381;9382;10738;10739;10740;10741;10742;17272;17278;18185;20934;20935;20936;22450;22451;25498;25499;25500;25501;25502;25503;25504;25505;25506;25507;25508;25509;37742;37743;39983;39984;39985;39986;39987;39988;39989;39990;43780;43781;43782;43783;43784;50322;50323;50324;50325;50326;50327;50328;50329;50330;50331;5033…	3049;3050;3051;4430;4431;4432;4433;4434;4435;4436;8956;8957;8958;8959;8960;9157;10515;10516;10517;10518;10519;16902;16909;17869;20658;20659;22072;25332;25333;25334;25335;25336;25337;25338;25339;37839;40207;40208;40209;40210;40211;40212;40213;44135;44136;44137;44138;50430;50431;50432;50433;50434;50435;50436;50437;50438;50439;50440;50614;50615;50616;50617;50618;50619;50620;50621;50622;50623;50624	3051;4434;8957;9157;10518;16902;16909;17869;20659;22072;25333;25335;25337;37839;40211;44136;50434;50440;50618	231;232;233;234;235;236;237	127;134;177;187;195;257;273
Q53TN4	CYBRD1	Cytochrome b reductase 1 OS=Homo sapiens GN=CYBRD1 PE=1 SV=1	Cytochrome b reductase 1	5	5	5	1	5	5	5	1	5	1	5	1	5	18.5	18.5	18.5	31.641	286	286	0	85.929	By MS/MS	By MS/MS	3.5	18.5	129730000	236430	129500000	0	113360000	2	17	19				1816	5941;8594;8595;15145;17147	True;True;True;True;True	6413;9265;9266;9267;16551;18721	15735;15736;15737;15738;22885;22886;22887;22888;22889;22890;22891;41534;41535;41536;41537;41538;47144;47145;47146	15433;15434;15435;15436;22465;22466;22467;22468;22469;22470;41712;41713;41714;41715;41716;41717;47335;47336;47337	15435;22467;22470;41716;47337	1944;1945	249;257
P08574	CYC1	Cytochrome c1, heme protein, mitochondrial OS=Homo sapiens GN=CYC1 PE=1 SV=3	Cytochrome c1, heme protein, mitochondrial	4	4	4	1	4	4	4	0	4	0	4	0	4	20.6	20.6	20.6	35.422	325	325	0	33.202		By MS/MS	0	20.6	42355000	0	42355000	0	40104000	0	10	10				518	4379;5515;8241;9090	True;True;True;True	4730;5949;5950;5951;8877;9792	11735;11736;14656;14657;14658;14659;21967;21968;24253	11540;14403;14404;14405;14406;14407;21631;21632;23911;23912	11540;14406;21632;23911	455;456	164;166
Q7L576	CYFIP1	Cytoplasmic FMR1-interacting protein 1 OS=Homo sapiens GN=CYFIP1 PE=1 SV=1	Cytoplasmic FMR1-interacting protein 1	24	24	15	1	24	24	15	1	24	1	24	0	15	24.3	24.3	15.3	145.18	1253	1253	0	213.93	By matching	By MS/MS	0.9	24.3	258730000	48959	258680000	0	258050000	0	31	31				1939	1424;2294;2599;2676;2957;3565;6842;7072;10495;12284;14016;14730;16402;17710;18204;19340;19545;19744;19771;19805;22134;22618;22801;22805	True;True;True;True;True;True;True;True;True;True;True;True;True;True;True;True;True;True;True;True;True;True;True;True	1543;2482;2483;2804;2884;3187;3840;7374;7630;11293;13203;15059;16106;17917;19334;19864;21085;21307;21516;21544;21583;24113;24625;24825;24829	3947;3948;6273;6274;6275;6276;7065;7066;7236;7237;8044;9602;18129;18762;18763;28074;28075;33098;33099;33100;33101;37983;40446;45141;45142;45143;48582;49842;49843;53209;53210;53846;54353;54354;54426;54427;54530;54531;61181;62381;62382;63049;63059	3817;3818;6166;6167;6168;6914;6915;7080;7890;9370;17811;18423;27996;27997;33270;38069;40651;45412;45413;48784;49967;49968;53520;53521;54187;54700;54780;54894;61355;62505;63323;63335	3818;6167;6915;7080;7890;9370;17811;18423;27996;33270;38069;40651;45412;48784;49968;53521;54187;54700;54780;54894;61355;62505;63323;63335	1975	561
Q96F07	CYFIP2	Cytoplasmic FMR1-interacting protein 2 OS=Homo sapiens GN=CYFIP2 PE=1 SV=2	Cytoplasmic FMR1-interacting protein 2	11	2	2	1	11	2	2	1	11	0	2	0	2	11	2.3	2.3	148.4	1278	1278	0.00073746	12.31	By matching	By MS/MS	0.9	11	3049700	0	3049700	0	3049700	0	1	1				2209	2676;3219;6842;10495;12284;14730;16402;19340;19545;19771;22804	False;True;False;False;False;False;False;False;False;False;True	2884;3473;7374;11293;13203;16106;17917;21085;21307;21544;24828	7236;7237;8685;8686;18129;28074;28075;33098;33099;33100;33101;40446;45141;45142;45143;53209;53210;53846;54426;54427;63058	7080;8505;17811;27996;27997;33270;40651;45412;45413;53520;53521;54187;54780;63334	7080;8505;17811;27996;33270;40651;45412;53521;54187;54780;63334
Q6UW02	CYP20A1	Cytochrome P450 20A1 OS=Homo sapiens GN=CYP20A1 PE=2 SV=1	Cytochrome P450 20A1	3	3	3	1	3	3	3	0	3	0	3	0	3	8	8	8	52.432	462	462	0	22.242		By MS/MS	0	8	4735400	0	4735400	0	4735400	0	3	3				1910	13626;13888;22228	True;True;True	14644;14928;24212	36786;36787;37672;37673;61406	36784;37774;61557	36784;37774;61557
Q02318	CYP27A1	Sterol 26-hydroxylase, mitochondrial OS=Homo sapiens GN=CYP27A1 PE=1 SV=1	Sterol 26-hydroxylase, mitochondrial	3	3	3	1	3	3	3	0	3	0	3	0	3	11.3	11.3	11.3	60.234	531	531	0	25.332		By MS/MS	0	11.3	10280000	0	10280000	0	10280000	0	3	3				1456	3994;12721;21804	True;True;True	4319;13669;23765	10774;34247;60334	10543;34313;60521	10543;34313;60521
Q16850	CYP51A1	Lanosterol 14-alpha demethylase OS=Homo sapiens GN=CYP51A1 PE=1 SV=3	Lanosterol 14-alpha demethylase	4	4	4	1	4	4	4	0	4	0	4	0	4	12.3	12.3	12.3	56.805	503	503	0	51.07		By MS/MS	0	12.3	26738000	0	26738000	0	26738000	0	4	4				1780	9557;14908;18009;19745	True;True;True;True	10291;16302;19658;21517	25411;40948;49380;54355	25253;41137;49537;54701	25253;41137;49537;54701
P98082	DAB2	Disabled homolog 2 OS=Homo sapiens GN=DAB2 PE=1 SV=3	Disabled homolog 2	3	3	3	1	3	3	3	0	3	0	3	0	3	4.4	4.4	4.4	82.447	770	770	0	22.311		By MS/MS	0	4.4	13256000	0	13256000	0	13256000	0	3	3				1423	3663;12421;19016	True;True;True	3942;13349;20733	9841;33426;33427;52287	9573;33562;52574	9573;33562;52574
P61803	DAD1	Dolichyl-diphosphooligosaccharide--protein glycosyltransferase subunit DAD1 OS=Homo sapiens GN=DAD1 PE=1 SV=3	Dolichyl-diphosphooligosaccharide--protein glycosyltransferase subunit DAD1	5	5	5	1	5	5	5	3	5	3	5	3	5	36.3	36.3	36.3	12.497	113	113	0	33.904	By MS/MS	By MS/MS	26.5	36.3	141340000	322060	141020000	357170	139120000	1	12	13				1300	408;6890;10505;14577;16997	True;True;True;True;True	447;7424;11304;15892;18558	1184;1185;1186;18260;18261;18262;18263;18264;28101;28102;28103;39912;46759;46760;46761;46762	1214;1215;17951;17952;17953;17954;28019;40134;46972;46973;46974;46975;46976;46977	1215;17952;28019;40134;46974	1500	1
Q14118	DAG1	Dystroglycan OS=Homo sapiens GN=DAG1 PE=1 SV=2	Dystroglycan;Alpha-dystroglycan;Beta-dystroglycan	4	4	4	1	4	4	4	0	4	0	4	0	4	6.4	6.4	6.4	97.44	895	895	0	27.225		By MS/MS	0	6.4	12649000	0	12649000	0	12649000	0	5	5				1628	9190;13598;15739;18533	True;True;True;True	9900;14614;17205;20209	24484;36705;36706;43288;43289;50757	24235;36715;43662;50872;50873	24235;36715;43662;50872	1784	561
Q8NCG7	DAGLB	Sn1-specific diacylglycerol lipase beta OS=Homo sapiens GN=DAGLB PE=1 SV=2	Sn1-specific diacylglycerol lipase beta	2	2	2	1	2	2	2	0	2	0	2	0	2	3.6	3.6	3.6	73.731	672	672	0.00073341	12.154		By MS/MS	0	3.6	2745100	0	2745100	0	2745100	0	2	2				2052	10042;14439	True;True	10797;15680	26805;39371	26744;39490	26744;39490
Q3LXA3	DAK	Bifunctional ATP-dependent dihydroxyacetone kinase/FAD-AMP lyase (cyclizing) OS=Homo sapiens GN=DAK PE=1 SV=2	Bifunctional ATP-dependent dihydroxyacetone kinase/FAD-AMP lyase (cyclizing);ATP-dependent dihydroxyacetone kinase;FAD-AMP lyase (cyclizing)	8	8	8	1	8	8	8	0	8	0	8	0	8	25.2	25.2	25.2	58.946	575	575	0	58.203		By MS/MS	0	25.2	16654000	0	16654000	0	16654000	0	10	10				1795	584;2220;5267;11973;12384;19594;19961;20015	True;True;True;True;True;True;True;True	641;2400;5688;12870;13309;21359;21749;21814	1654;1655;6041;6042;13995;32150;32151;32152;33321;53965;54925;54926;55075	1666;5922;13739;32146;32147;32148;33487;54304;55322;55457;55458;55459	1666;5922;13739;32147;33487;54304;55322;55459
P51398	DAP3	28S ribosomal protein S29, mitochondrial OS=Homo sapiens GN=DAP3 PE=1 SV=1	28S ribosomal protein S29, mitochondrial	2	2	2	1	2	2	2	0	2	0	2	0	2	8	8	8	45.566	398	398	0.00080192	14.647		By MS/MS	0	8	4751000	0	4751000	0	4751000	0	2	2				1156	5202;6627	True;True	5614;7147	13787;13788;17495	13558;17131	13558;17131
P14868	DARS	Aspartate--tRNA ligase, cytoplasmic OS=Homo sapiens GN=DARS PE=1 SV=2	Aspartate--tRNA ligase, cytoplasmic	13	13	13	1	13	13	13	3	13	3	13	3	13	32.5	32.5	32.5	57.136	501	501	0	207.17	By matching	By MS/MS	7.8	32.5	200450000	297600	200160000	405520	196140000	0	34	34				641	396;4696;6109;7098;7681;7860;10076;10997;12010;13082;16533;16582;20466	True;True;True;True;True;True;True;True;True;True;True;True;True	434;5066;5067;6591;7660;8280;8473;10832;11834;12909;14065;18063;18116;22298	1149;1150;1151;12522;12523;12524;12525;12526;12527;12528;16147;16148;16149;18864;18865;20486;20487;20488;20937;20938;26925;26926;26927;26928;26929;29513;29514;32232;32233;35314;35315;35316;35317;35318;35319;45473;45474;45602;45603;56371;56372	1190;1191;12313;12314;12315;12316;12317;12318;12319;12320;15822;15823;15824;15825;18538;18539;20263;20264;20660;26851;26852;26853;29481;32220;32221;35373;35374;35375;35376;45693;45694;45813;56720;56721	1191;12316;15822;18539;20263;20660;26851;29481;32220;35376;45693;45813;56721	617	362
P07108	DBI	Acyl-CoA-binding protein OS=Homo sapiens GN=DBI PE=1 SV=2	Acyl-CoA-binding protein	3	3	3	1	3	3	3	0	3	0	3	0	3	52.9	52.9	52.9	10.044	87	87	0	19.481		By MS/MS	0	52.9	36442000	0	36442000	0	36442000	0	6	6				479	1206;15971;19174	True;True;True	1311;17457;20904	3301;43992;43993;52747;52748	3220;44328;44329;53050;53051;53052	3220;44329;53051
Q16643	DBN1	Drebrin OS=Homo sapiens GN=DBN1 PE=1 SV=4	Drebrin	13	13	13	1	13	13	13	1	13	1	13	1	13	26.8	26.8	26.8	71.428	649	649	0	99.456	By matching	By MS/MS	3.1	26.8	173910000	62845	173850000	0	173850000	0	27	27				1764	983;4223;4878;5071;5294;5982;11347;11456;11929;13323;17286;18013;22912	True;True;True;True;True;True;True;True;True;True;True;True;True	1065;4567;5265;5475;5716;6456;12205;12322;12825;14327;18867;19662;24942	2711;2712;2713;11345;13007;13472;13473;14053;15835;15836;30400;30660;30661;30662;30663;30664;30665;32068;32069;35978;35979;47492;47493;49389;63323;63324;63325;63326;63327	2663;2664;2665;11134;12795;12796;12797;13257;13258;13799;13800;15516;30292;30524;30525;30526;30527;32073;32074;36002;36003;36004;47671;47672;49544;63586;63587;63588	2664;11134;12797;13257;13799;15516;30292;30527;32073;36003;47671;49544;63586
Q9UJU6	DBNL	Drebrin-like protein OS=Homo sapiens GN=DBNL PE=1 SV=1	Drebrin-like protein	7	7	7	1	7	7	7	0	7	0	7	0	7	24	24	24	48.207	430	430	0	124.98		By MS/MS	0	24	71258000	0	71258000	0	71258000	0	13	13				2672	556;7056;7288;18016;19859;19971;20795	True;True;True;True;True;True;True	611;612;7611;7859;19665;21642;21761;21762;22660	1587;1588;1589;18719;18720;19370;19371;19372;49395;49396;54686;54687;54950;54951;54952;54953;57365	1598;1599;18381;19056;19057;19058;19059;49548;55092;55093;55094;55345;55346;55347;57669	1598;18381;19058;49548;55093;55345;57669	2258;2259	53;129
P61962	DCAF7	DDB1- and CUL4-associated factor 7 OS=Homo sapiens GN=DCAF7 PE=1 SV=1	DDB1- and CUL4-associated factor 7	5	5	5	1	5	5	5	5	4	5	4	5	4	18.4	18.4	18.4	38.926	342	342	0	46.341	By MS/MS	By MS/MS	18.4	14.6	15450000	499260	14951000	510870	14940000	2	5	7				1304	8867;11525;12931;15564;21387	True;True;True;True;True	9554;12392;13904;17016;23310	23682;23683;23684;23685;30872;30873;34883;34884;34885;42829;42830;42831;59079;59080;59081	23269;23270;30770;34950;43183;59207;59208;59209	23270;30770;34950;43183;59209
Q5TAQ9	DCAF8	DDB1- and CUL4-associated factor 8 OS=Homo sapiens GN=DCAF8 PE=1 SV=1	DDB1- and CUL4-associated factor 8	2	2	2	1	2	2	2	0	2	0	2	0	2	3.7	3.7	3.7	66.851	597	597	0.00075273	12.883		By MS/MS	0	3.7	42630000	0	42630000	0	42630000	0	2	2				1845	14602;19947	True;True	15930;21735	39997;39998;39999;54883	40219;55288	40219;55288
P07585	DCN	Decorin OS=Homo sapiens GN=DCN PE=1 SV=1	Decorin	6	6	6	1	6	6	6	0	6	0	6	0	6	21.4	21.4	21.4	39.746	359	359	0	50.833		By MS/MS	0	21.4	58069000	0	58069000	0	58069000	0	9	9				488	2054;3761;18178;21524;21846;21847	True;True;True;True;True;True	2219;4050;19835;19836;23458;23808;23809	5584;5585;5586;10070;10071;49786;49787;59421;59422;59423;59424;60439;60440	5500;5501;5502;9778;49919;49920;59537;60607;60608	5500;9778;49919;59537;60607;60608	399	199
Q96C86	DCPS	m7GpppX diphosphatase OS=Homo sapiens GN=DCPS PE=1 SV=2	m7GpppX diphosphatase	4	4	4	1	4	4	4	0	4	0	4	0	4	14.5	14.5	14.5	38.608	337	337	0	37.906		By MS/MS	0	14.5	3416100	0	3416100	0	3416100	0	4	4				2186	356;3813;19723;21181	True;True;True;True	385;4107;21495;23088	1030;10212;54301;58507	1068;9951;54641;58679	1068;9951;54641;58679
P32321	DCTD	Deoxycytidylate deaminase OS=Homo sapiens GN=DCTD PE=1 SV=2	Deoxycytidylate deaminase	3	3	3	1	3	3	3	1	3	1	3	1	3	20.8	20.8	20.8	20.016	178	178	0	28.348	By matching	By MS/MS	4.5	20.8	8519200	32188	8487000	0	8487000	0	6	6				928	10862;12430;17634	True;True;True	11690;13359;19250	29061;29062;29063;33444;33445;33446;48393;48394;48395;48396	28983;28984;33576;48618;48619;48620	28983;33576;48618
Q14203	DCTN1	Dynactin subunit 1 OS=Homo sapiens GN=DCTN1 PE=1 SV=3	Dynactin subunit 1	32	32	32	1	32	32	32	1	32	1	32	1	32	33.8	33.8	33.8	141.69	1278	1278	0	323.31	By matching	By MS/MS	0.7	33.8	262440000	35071	262400000	0	259030000	0	52	52				1639	611;681;768;1188;1918;1964;3652;4087;4218;5753;6275;7241;7686;8533;8714;10115;11881;12339;13416;13797;14520;14543;16413;16432;16537;17676;19612;20151;20268;20592;21617;22373	True;True;True;True;True;True;True;True;True;True;True;True;True;True;True;True;True;True;True;True;True;True;True;True;True;True;True;True;True;True;True;True	669;740;831;1292;2078;2125;3931;4421;4562;6200;6769;7810;8285;9199;9392;10872;12775;13263;14423;14828;15804;15805;15841;17928;17950;18067;19296;21378;21957;22083;22432;22433;23555;24366	1734;1735;1882;2107;2108;2109;2110;3260;3261;5268;5269;5380;9807;9808;9809;11008;11009;11332;11333;11334;15230;15231;16591;19265;19266;19267;20505;22733;23195;23196;27020;27021;31941;31942;31943;31944;33231;33232;36232;36233;37346;39641;39642;39643;39644;39766;39767;45170;45231;45232;45481;48491;48492;54001;54002;55491;55492;55794;56746;56747;56748;56749;56750;59708;61783	1739;1740;1887;2090;2091;2092;2093;3186;3187;5195;5196;5314;9547;10791;10792;10793;11123;14926;16267;18966;18967;18968;20279;22330;22759;22760;26941;31943;31944;33404;33405;36296;36297;37452;39747;39748;39749;39924;45436;45482;45698;48702;48703;54337;54338;55920;56182;57086;57087;57088;57089;57090;59827;61925	1739;1887;2091;3187;5196;5314;9547;10793;11123;14926;16267;18967;20279;22330;22759;26941;31944;33405;36297;37452;39749;39924;45436;45482;45698;48703;54338;55920;56182;57090;59827;61925	1798;1799	692;805
Q13561	DCTN2	Dynactin subunit 2 OS=Homo sapiens GN=DCTN2 PE=1 SV=4	Dynactin subunit 2	4	4	4	1	4	4	4	0	4	0	4	0	4	14.5	14.5	14.5	44.23	401	401	0	61.431		By MS/MS	0	14.5	18969000	0	18969000	0	18969000	0	5	5				1597	5863;13549;19039;21445	True;True;True;True	6330;14562;20758;23371	15540;15541;36562;52342;59219;59220	15227;15228;36583;52626;59336	15228;36583;52626;59336
O75935	DCTN3	Dynactin subunit 3 OS=Homo sapiens GN=DCTN3 PE=1 SV=1	Dynactin subunit 3	3	3	3	1	3	3	3	1	3	1	3	1	3	18.8	18.8	18.8	21.119	186	186	0	24.711	By matching	By MS/MS	10.8	18.8	19188000	18900	19169000	0	19169000	0	5	5				310	903;11195;11563	True;True;True	980;12046;12433	2514;30043;30044;30989;30990;30991;30992	2484;29966;30876;30877;30878	2484;29966;30877
Q9UJW0	DCTN4	Dynactin subunit 4 OS=Homo sapiens GN=DCTN4 PE=1 SV=1	Dynactin subunit 4	9	9	9	1	9	9	9	0	9	0	9	0	9	32.6	32.6	32.6	52.337	460	460	0	66.624		By MS/MS	0	32.6	61902000	0	61902000	0	61902000	0	12	12				2673	823;1976;2172;6144;9732;10338;12415;18408;21122	True;True;True;True;True;True;True;True;True	892;2137;2345;6630;10472;11124;13342;20078;23007	2286;2287;5400;5900;16219;25860;27651;33407;33408;50429;50430;50431;50432;58291;58292;58293	2279;5332;5797;15889;15890;25691;27595;33550;50548;50549;50550;58495	2279;5332;5797;15889;25691;27595;33550;50550;58495
Q9BTE1	DCTN5	Dynactin subunit 5 OS=Homo sapiens GN=DCTN5 PE=1 SV=1	Dynactin subunit 5	3	3	3	1	3	3	3	0	3	0	3	0	3	17.6	17.6	17.6	20.126	182	182	0	34.699		By MS/MS	0	17.6	15972000	0	15972000	0	14212000	0	5	5				2337	6934;14194;16597	True;True;True	7471;15330;15331;18132	18375;38589;38590;38591;45623	18053;38689;38690;38691;45834	18053;38690;45834	2123	1
O00399	DCTN6	Dynactin subunit 6 OS=Homo sapiens GN=DCTN6 PE=1 SV=1	Dynactin subunit 6	3	3	3	1	3	3	3	0	3	0	3	0	3	22.1	22.1	22.1	20.747	190	190	0	21.401		By MS/MS	0	22.1	9755400	0	9755400	0	9755400	0	3	3				82	9466;14283;21417	True;True;True	10195;15462;23343	25168;38869;59157	24997;38968;59282	24997;38968;59282
Q8IWE4	DCUN1D3	DCN1-like protein 3 OS=Homo sapiens GN=DCUN1D3 PE=1 SV=1	DCN1-like protein 3	4	4	4	1	4	4	4	0	4	0	4	0	4	17.1	17.1	17.1	34.291	304	304	0	26.568		By MS/MS	0	17.1	11244000	0	11244000	0	11244000	0	4	4				1997	6579;7453;20976;22514	True;True;True;True	7094;8040;22854;24513;24514	17357;17358;19853;19854;57913;62110;62111	16987;19572;58136;62248;62249	16987;19572;58136;62249	1989	111
Q7Z4W1	DCXR	L-xylulose reductase OS=Homo sapiens GN=DCXR PE=1 SV=2	L-xylulose reductase	3	3	3	1	3	3	3	0	3	0	3	0	3	14.3	14.3	14.3	25.913	244	244	0	19.445		By MS/MS	0	14.3	8153100	0	8153100	0	8153100	0	5	5				1962	2314;8825;14193	True;True;True	2505;9512;15329	6324;6325;23532;23533;38587;38588	6205;23084;23085;38687;38688	6205;23085;38687
O94760	DDAH1	N(G),N(G)-dimethylarginine dimethylaminohydrolase 1 OS=Homo sapiens GN=DDAH1 PE=1 SV=3	N(G),N(G)-dimethylarginine dimethylaminohydrolase 1	7	6	6	1	7	6	6	2	7	1	6	1	6	32.3	29.5	29.5	31.121	285	285	0	39.54	By matching	By MS/MS	6.7	32.3	39277000	23818	39253000	0	39253000	0	9	9				322	891;4533;5118;7411;16217;17317;20165	True;True;False;True;True;True;True	967;4894;5524;7997;17725;18901;21973	2476;2477;2478;12100;12101;13578;13579;13580;19740;19741;44627;47561;55526	2447;2448;11891;11892;11893;13359;19454;19455;44963;47732;55953	2447;11892;13359;19455;44963;47732;55953
O95865	DDAH2	N(G),N(G)-dimethylarginine dimethylaminohydrolase 2 OS=Homo sapiens GN=DDAH2 PE=1 SV=1	N(G),N(G)-dimethylarginine dimethylaminohydrolase 2	8	8	7	1	8	8	7	3	8	3	8	2	7	39.6	39.6	36.8	29.644	285	285	0	63.316	By matching	By MS/MS	11.9	39.6	90544000	106280	90438000	543540	90001000	0	13	13				383	3141;5118;7414;7899;8701;8824;10838;19849	True;True;True;True;True;True;True;True	3388;5524;8000;8516;9379;9511;11664;21629	8479;8480;8481;8482;8483;13578;13579;13580;19745;19746;19747;21049;21050;23168;23530;23531;29004;29005;29006;54652;54653	8334;8335;13359;19459;19460;20760;20761;22735;23083;28933;28934;55041;55042	8334;13359;19459;20761;22735;23083;28933;55041
Q16531	DDB1	DNA damage-binding protein 1 OS=Homo sapiens GN=DDB1 PE=1 SV=1	DNA damage-binding protein 1	20	20	20	1	20	20	20	4	20	4	20	4	20	24.1	24.1	24.1	126.97	1140	1140	0	156.49	By matching	By MS/MS	3.5	24.1	115080000	119830	114960000	106540	114430000	0	26	26				1754	1545;4020;5797;6195;7513;7574;9504;9775;10923;11358;11868;11921;12568;14544;16188;17128;18459;18568;22537;22583	True;True;True;True;True;True;True;True;True;True;True;True;True;True;True;True;True;True;True;True	1672;4347;6250;6687;8106;8168;10236;10515;11755;12218;12762;12816;13505;15842;15843;17693;18700;20131;20246;24538;24589	4297;10832;10833;15370;15371;15372;16391;20009;20010;20146;20147;25293;25954;25955;29256;29257;29258;30425;31913;31914;31915;32043;32044;33804;33805;33806;33807;39768;39769;44570;44571;47090;50551;50893;62187;62188;62189;62296;62297	4165;10598;10599;15075;16082;19693;19819;25131;25132;25777;29199;30316;31923;32042;32043;32044;33936;39925;39926;39927;44914;47293;50656;51017;62318;62423	4165;10599;15075;16082;19693;19819;25132;25777;29199;30316;31923;32042;33936;39925;44914;47293;50656;51017;62318;62423	1913	1105
[truncated: 2,185 more rows]
