# Supplementary material for: The host exosome pathway underpins biogenesis of the human cytomegalovirus virion
Source: eLife. 2020 Sep 10;9:e58288. doi: 10.7554/eLife.58288 (PMC7556872; doi:10.7554/eLife.58288)
Supplement: Supplementary file 2. [file elife-58288-supp2.xlsx]

## Sheet: MaxQuant search
		Table legend.
		Fractions 1-10 (increasing density)	Uninfected gradient replicate 1
		Fractions 21-30	Uninfected gradient replicate 2
		Fractions 41-50	Uninfected gradient replicate 3
		Fractions 11-20	Infected gradient replicate 1
		Fractions 31-40	Infected gradient replicate 2
		Fractions 51-60	Infected gradient replicate 3
Gene name	UniProt protein ID	Fasta headers	Protein names	Peptide counts (all)	Peptide counts (razor+unique)	Peptide counts (unique)	Number of proteins	Peptides	Razor + unique peptides	Unique peptides	Peptides 1	Peptides 10	Peptides 11	Peptides 12	Peptides 13	Peptides 14	Peptides 15	Peptides 16	Peptides 17	Peptides 18	Peptides 19	Peptides 2	Peptides 20	Peptides 21	Peptides 22	Peptides 23	Peptides 24	Peptides 25	Peptides 26	Peptides 27	Peptides 28	Peptides 29	Peptides 3	Peptides 30	Peptides 31	Peptides 32	Peptides 33	Peptides 34	Peptides 35	Peptides 36	Peptides 37	Peptides 38	Peptides 39	Peptides 4	Peptides 40	Peptides 41	Peptides 42	Peptides 43	Peptides 44
A2M	P01023	Alpha-2-macroglobulin OS=Homo sapiens GN=A2M PE=1 SV=3	Alpha-2-macroglobulin	12	3	3	1	12	3	3	11	8	10	9	8	8	11	10	8	10	8	10	9	8	9	9	9	7	8	8	8	5	8	7	7	5	7	6	5	5	6	6	4	12	3	7	4	2	7
A2ML1	A8K2U0	Alpha-2-macroglobulin-like protein 1 OS=Homo sapiens GN=A2ML1 PE=1 SV=3	Alpha-2-macroglobulin-like protein 1	12	12	12	1	12	12	12	10	4	7	9	8	2	9	9	5	9	9	10	10	10	9	9	9	0	2	6	2	0	10	10	3	0	3	2	0	0	1	7	0	9	1	9	7	0	9
AAMP	Q13685	Angio-associated migratory cell protein OS=Homo sapiens GN=AAMP PE=1 SV=2	Angio-associated migratory cell protein	2	2	2	1	2	2	2	1	0	2	2	2	2	2	2	2	2	0	1	0	0	1	0	0	0	0	0	0	0	1	0	2	0	1	0	0	0	0	0	0	0	0	1	0	0	0
AARS	P49588	Alanine--tRNA ligase, cytoplasmic OS=Homo sapiens GN=AARS PE=1 SV=2	Alanine--tRNA ligase, cytoplasmic	22	22	22	1	22	22	22	18	1	17	19	20	7	14	16	20	16	0	16	8	16	17	9	1	2	3	2	1	0	6	0	9	5	7	3	0	0	2	5	1	3	0	7	6	0	3
ABCC1	P33527	Multidrug resistance-associated protein 1 OS=Homo sapiens GN=ABCC1 PE=1 SV=3	Multidrug resistance-associated protein 1	13	13	13	1	13	13	13	10	0	12	13	12	3	10	7	6	8	0	9	1	8	9	8	2	0	0	2	0	0	7	0	3	0	2	0	0	1	0	1	0	6	0	5	4	0	4
ABCE1	P61221	ATP-binding cassette sub-family E member 1 OS=Homo sapiens GN=ABCE1 PE=1 SV=1	ATP-binding cassette sub-family E member 1	5	5	5	1	5	5	5	2	0	2	1	2	0	2	1	4	2	0	2	2	3	4	2	0	0	0	0	0	0	0	0	1	0	0	0	0	0	1	3	0	0	0	3	2	0	2
ABCF1	Q8NE71	ATP-binding cassette sub-family F member 1 OS=Homo sapiens GN=ABCF1 PE=1 SV=2	ATP-binding cassette sub-family F member 1	9	9	9	1	9	9	9	4	0	3	4	3	0	2	3	9	8	0	2	2	3	2	2	0	0	0	1	1	0	1	0	3	0	3	1	0	0	2	1	0	1	0	0	0	0	0
ABCF3	Q9NUQ8	ATP-binding cassette sub-family F member 3 OS=Homo sapiens GN=ABCF3 PE=1 SV=2	ATP-binding cassette sub-family F member 3	2	2	2	1	2	2	2	1	0	1	1	1	0	0	0	2	1	0	1	0	1	1	0	0	0	0	0	0	0	0	0	0	0	0	0	0	0	0	0	0	0	0	1	1	0	0
ABI1	Q8IZP0	Abl interactor 1 OS=Homo sapiens GN=ABI1 PE=1 SV=4	Abl interactor 1	5	5	4	1	5	5	4	2	0	4	5	4	0	4	5	4	2	0	3	2	4	4	3	4	0	0	0	0	0	4	0	1	1	0	0	0	0	0	1	0	4	0	3	3	0	2
ABRACL	Q9P1F3	Costars family protein ABRACL OS=Homo sapiens GN=ABRACL PE=1 SV=1	Costars family protein ABRACL	2	2	2	1	2	2	2	2	0	2	2	2	0	2	1	1	1	0	2	1	1	2	1	0	0	0	0	0	0	1	1	1	0	1	1	0	0	1	0	0	1	0	1	0	0	0
ACACA	Q13085	Acetyl-CoA carboxylase 1 OS=Homo sapiens GN=ACACA PE=1 SV=2	Acetyl-CoA carboxylase 1;Biotin carboxylase	7;1	7;1	7;1	2	7	7	7	0	0	0	1	0	0	1	1	7	6	0	0	2	0	2	2	0	0	0	1	0	0	0	0	0	0	0	0	0	0	0	0	0	0	0	0	0	0	0
ACAT1	P24752	Acetyl-CoA acetyltransferase, mitochondrial OS=Homo sapiens GN=ACAT1 PE=1 SV=1	Acetyl-CoA acetyltransferase, mitochondrial	6	6	6	1	6	6	6	5	0	4	3	3	0	4	4	6	4	0	4	1	2	3	2	1	0	0	1	2	0	3	0	2	0	2	0	0	0	1	1	0	1	0	0	0	0	0
ACAT2	Q9BWD1	Acetyl-CoA acetyltransferase, cytosolic OS=Homo sapiens GN=ACAT2 PE=1 SV=2	Acetyl-CoA acetyltransferase, cytosolic	4	4	4	1	4	4	4	2	0	2	2	3	0	3	2	2	3	0	2	2	3	3	1	1	0	0	0	0	0	2	0	1	0	1	1	0	0	1	0	0	2	0	0	0	0	0
ACBD3	Q9H3P7	Golgi resident protein GCP60 OS=Homo sapiens GN=ACBD3 PE=1 SV=4	Golgi resident protein GCP60	2	2	2	1	2	2	2	0	0	2	2	2	1	1	1	2	2	0	0	0	0	0	0	0	0	0	0	0	0	0	0	1	1	1	0	0	0	0	1	0	0	0	0	0	0	0
ACLY	P53396	ATP-citrate synthase OS=Homo sapiens GN=ACLY PE=1 SV=3	ATP-citrate synthase	33	33	33	1	33	33	33	19	1	22	24	24	11	22	17	30	26	5	17	11	16	15	14	3	0	1	12	3	0	11	1	15	11	10	8	2	2	10	14	3	7	3	8	4	1	4
ACO1	P21399	Cytoplasmic aconitate hydratase OS=Homo sapiens GN=ACO1 PE=1 SV=3	Cytoplasmic aconitate hydratase	9	9	9	1	9	9	9	7	1	7	5	6	2	7	5	8	7	2	8	5	4	5	4	1	0	0	2	1	1	4	1	1	1	1	1	0	0	0	2	0	3	1	2	2	0	2
ACO2	Q99798	Aconitate hydratase, mitochondrial OS=Homo sapiens GN=ACO2 PE=1 SV=2	Aconitate hydratase, mitochondrial	5	5	5	1	5	5	5	3	0	2	3	4	0	3	2	5	4	0	2	1	1	3	1	0	0	0	1	0	0	1	0	1	0	1	0	0	0	0	2	0	1	0	1	1	0	0
ACOT7	O00154	Cytosolic acyl coenzyme A thioester hydrolase OS=Homo sapiens GN=ACOT7 PE=1 SV=3	Cytosolic acyl coenzyme A thioester hydrolase	11	11	11	1	11	11	11	9	0	9	9	9	1	9	9	10	9	1	9	6	6	9	6	2	0	0	0	0	0	6	1	3	3	1	0	1	1	2	2	0	4	0	5	4	0	1
ACP1	P24666	Low molecular weight phosphotyrosine protein phosphatase OS=Homo sapiens GN=ACP1 PE=1 SV=3	Low molecular weight phosphotyrosine protein phosphatase	4	4	4	1	4	4	4	3	0	3	3	3	1	3	2	3	3	1	2	3	3	3	4	2	0	0	0	0	0	1	1	1	0	1	0	0	0	0	3	0	2	0	3	3	0	2
ACSL3	O95573	Long-chain-fatty-acid--CoA ligase 3 OS=Homo sapiens GN=ACSL3 PE=1 SV=3	Long-chain-fatty-acid--CoA ligase 3	4	2	2	1	4	2	2	2	0	2	2	1	0	1	1	2	2	0	2	0	3	3	3	1	0	0	1	2	0	2	0	1	0	1	0	0	0	0	0	0	0	0	2	0	0	0
ACSL4	O60488	Long-chain-fatty-acid--CoA ligase 4 OS=Homo sapiens GN=ACSL4 PE=1 SV=2	Long-chain-fatty-acid--CoA ligase 4	9	9	7	1	9	9	7	6	0	5	5	7	0	2	3	5	4	0	7	0	8	8	4	2	0	0	2	1	0	4	0	3	0	1	2	0	0	0	2	0	2	0	5	4	0	3
ACTG1	P63261	Actin, cytoplasmic 2 OS=Homo sapiens GN=ACTG1 PE=1 SV=1	Actin, cytoplasmic 2;Actin, cytoplasmic 2, N-terminally processed	26	26	1	1	26	26	1	25	15	25	24	25	20	23	22	23	24	22	24	23	23	23	21	22	16	16	20	15	11	25	15	19	16	19	17	15	12	18	17	15	24	14	22	19	16	18
ACTG2	P63267	Actin, gamma-enteric smooth muscle OS=Homo sapiens GN=ACTG2 PE=1 SV=1;Actin, alpha cardiac muscle 1 OS=Homo sapiens GN=ACTC1 PE=1 SV=1;Actin, aortic smooth muscle OS=Homo sapiens GN=ACTA2 PE=1 SV=1;Actin, alpha skeletal muscle OS=Homo sapiens GN=ACTA1 PE=1	Actin, gamma-enteric smooth muscle;Actin, alpha cardiac muscle 1;Actin, aortic smooth muscle;Actin, alpha skeletal muscle	16;16;16;15	5;5;5;4	5;5;5;4	4	16	5	5	15	11	15	15	15	13	15	15	16	16	11	15	14	16	14	15	15	10	10	14	8	7	15	9	12	10	13	12	8	7	10	14	7	15	8	15	12	9	12
ACTL6A	O96019	Actin-like protein 6A OS=Homo sapiens GN=ACTL6A PE=1 SV=1	Actin-like protein 6A	3	3	3	1	3	3	3	1	0	3	2	2	1	1	0	3	1	0	1	0	0	0	0	0	0	0	0	0	0	0	0	0	0	1	0	0	0	0	0	0	0	0	0	0	0	0
ACTN1	P12814	Alpha-actinin-1 OS=Homo sapiens GN=ACTN1 PE=1 SV=2	Alpha-actinin-1	42;7	28;1	28;1	2	42	28	28	28	1	37	33	34	14	35	30	36	34	4	28	21	28	27	24	14	2	4	9	4	1	25	4	20	11	17	5	4	2	8	12	1	23	1	23	23	2	18
ACTN4	O43707	Alpha-actinin-4 OS=Homo sapiens GN=ACTN4 PE=1 SV=2	Alpha-actinin-4	44;5;1	44;5;1	30;0;1	3	44	44	30	35	2	39	36	38	20	36	27	34	29	12	34	21	26	29	26	20	6	4	11	4	1	26	8	20	12	15	6	3	4	9	18	1	28	1	31	26	3	21
ACTR1A	P61163	Alpha-centractin OS=Homo sapiens GN=ACTR1A PE=1 SV=1	Alpha-centractin	12	12	6	1	12	12	6	10	0	10	9	11	5	9	8	12	11	5	9	5	7	8	6	3	0	1	2	0	0	6	1	4	1	3	1	0	0	2	3	1	6	0	3	1	0	1
ACTR2	P61160	Actin-related protein 2 OS=Homo sapiens GN=ACTR2 PE=1 SV=1	Actin-related protein 2	10	10	10	1	10	10	10	9	0	9	9	7	2	6	8	7	6	1	9	4	6	5	3	1	0	0	6	0	0	4	2	3	2	2	0	0	0	1	2	0	4	1	6	8	0	4
ACTR3	P61158	Actin-related protein 3 OS=Homo sapiens GN=ACTR3 PE=1 SV=3	Actin-related protein 3	16;2	16;2	16;2	2	16	16	16	14	1	15	13	15	8	13	10	15	12	4	13	7	12	13	11	6	2	2	5	2	0	12	4	8	1	4	1	1	1	2	6	0	10	1	5	6	2	4
ADA	P00813	Adenosine deaminase OS=Homo sapiens GN=ADA PE=1 SV=3	Adenosine deaminase	2	2	2	1	2	2	2	0	0	2	2	2	2	1	1	1	1	0	1	0	0	1	1	0	0	0	0	0	1	0	0	1	0	2	0	0	0	0	1	0	1	0	0	0	0	0
ADAM10	O14672	Disintegrin and metalloproteinase domain-containing protein 10 OS=Homo sapiens GN=ADAM10 PE=1 SV=1	Disintegrin and metalloproteinase domain-containing protein 10	10	10	10	1	10	10	10	10	0	7	5	10	3	4	3	5	3	0	10	0	9	8	9	4	0	0	2	0	0	9	0	2	0	2	0	0	0	0	2	0	6	0	4	3	1	3
ADAM17	P78536	Disintegrin and metalloproteinase domain-containing protein 17 OS=Homo sapiens GN=ADAM17 PE=1 SV=1	Disintegrin and metalloproteinase domain-containing protein 17	3	3	3	1	3	3	3	3	0	2	2	2	0	1	1	1	1	0	3	0	3	3	2	0	0	0	0	0	0	2	0	0	0	0	0	0	0	0	1	0	2	0	2	1	0	0
ADD1	P35611	Alpha-adducin OS=Homo sapiens GN=ADD1 PE=1 SV=2	Alpha-adducin	4;1	4;1	4;1	2	4	4	4	3	0	1	1	2	1	0	0	3	0	0	4	0	3	4	3	1	1	0	1	0	0	3	0	0	0	0	1	0	0	0	0	1	2	0	2	2	0	1
ADD3	Q9UEY8	Gamma-adducin OS=Homo sapiens GN=ADD3 PE=1 SV=1	Gamma-adducin	4	4	4	1	4	4	4	4	0	2	2	3	1	1	1	1	1	0	3	0	3	3	4	0	0	0	0	0	0	3	0	1	0	0	1	0	0	0	0	0	2	0	3	2	0	2
ADH5	P11766	Alcohol dehydrogenase class-3 OS=Homo sapiens GN=ADH5 PE=1 SV=4	Alcohol dehydrogenase class-3	7	7	7	1	7	7	7	6	0	6	5	6	3	4	3	6	5	0	4	2	5	5	5	0	0	0	1	1	0	3	0	2	0	3	0	0	0	0	2	0	4	0	4	3	0	2
ADRM1	Q16186	Proteasomal ubiquitin receptor ADRM1 OS=Homo sapiens GN=ADRM1 PE=1 SV=2	Proteasomal ubiquitin receptor ADRM1	2	2	2	1	2	2	2	0	0	0	0	0	0	0	0	1	0	0	0	0	0	0	0	0	0	0	0	0	0	0	0	0	0	0	0	0	0	0	1	0	0	0	0	0	0	0
ADSS	P30520	Adenylosuccinate synthetase isozyme 2 OS=Homo sapiens GN=ADSS PE=1 SV=3	Adenylosuccinate synthetase isozyme 2	5	5	5	1	5	5	5	4	0	3	5	4	0	2	1	3	2	0	3	0	1	2	1	1	0	0	0	0	0	2	0	1	0	0	0	0	1	0	3	0	1	0	3	2	0	1
AGRN	O00468	Agrin OS=Homo sapiens GN=AGRN PE=1 SV=5	Agrin;Agrin N-terminal 110 kDa subunit;Agrin C-terminal 110 kDa subunit;Agrin C-terminal 90 kDa fragment;Agrin C-terminal 22 kDa fragment	37	37	37	1	37	37	37	2	1	8	5	9	3	19	27	34	34	8	3	19	1	2	6	2	1	0	19	7	0	13	1	1	1	1	1	1	1	7	14	1	7	1	3	2	0	13
AGTRAP	Q6RW13	Type-1 angiotensin II receptor-associated protein OS=Homo sapiens GN=AGTRAP PE=1 SV=1	Type-1 angiotensin II receptor-associated protein	2	2	2	1	2	2	2	2	0	2	2	2	0	2	2	2	2	0	2	1	1	1	2	0	0	0	0	0	0	2	0	0	0	0	0	0	0	0	0	0	2	0	0	0	0	0
AHCY	P23526	Adenosylhomocysteinase OS=Homo sapiens GN=AHCY PE=1 SV=4	Adenosylhomocysteinase	14	14	14	1	14	14	14	12	2	14	13	13	7	10	12	11	11	5	11	9	11	10	9	8	0	1	9	4	0	11	6	8	2	8	2	1	0	0	7	0	9	0	8	4	0	6
AHCYL1	O43865	Putative adenosylhomocysteinase 2 OS=Homo sapiens GN=AHCYL1 PE=1 SV=2;Putative adenosylhomocysteinase 3 OS=Homo sapiens GN=AHCYL2 PE=1 SV=1	Putative adenosylhomocysteinase 2;Putative adenosylhomocysteinase 3	4;3	4;3	4;3	2	4	4	4	3	0	3	3	3	1	2	2	3	2	0	3	0	2	1	2	0	0	0	2	0	0	2	0	1	0	0	0	0	0	0	0	0	0	0	0	0	0	0
AHNAK	Q09666	Neuroblast differentiation-associated protein AHNAK OS=Homo sapiens GN=AHNAK PE=1 SV=2	Neuroblast differentiation-associated protein AHNAK	167	167	167	1	167	167	167	129	4	132	122	133	49	109	80	77	88	28	120	35	116	128	106	54	2	2	19	8	3	114	22	59	23	44	16	3	0	6	30	3	86	0	83	80	2	73
AHSA1	O95433	Activator of 90 kDa heat shock protein ATPase homolog 1 OS=Homo sapiens GN=AHSA1 PE=1 SV=1	Activator of 90 kDa heat shock protein ATPase homolog 1	7	7	7	1	7	7	7	5	0	7	4	4	2	5	4	5	5	2	5	4	4	3	3	0	0	0	0	0	0	2	0	2	2	3	1	0	0	1	1	0	1	0	1	3	0	3
AIDA	Q96BJ3	Axin interactor, dorsalization-associated protein OS=Homo sapiens GN=AIDA PE=1 SV=1	Axin interactor, dorsalization-associated protein	4	4	4	1	4	4	4	3	0	3	2	2	0	1	0	1	0	0	3	0	3	3	3	1	0	0	0	0	0	1	0	0	0	0	0	0	0	0	1	0	1	0	2	2	0	1
AIMP1	Q12904	Aminoacyl tRNA synthase complex-interacting multifunctional protein 1 OS=Homo sapiens GN=AIMP1 PE=1 SV=2	Aminoacyl tRNA synthase complex-interacting multifunctional protein 1;Endothelial monocyte-activating polypeptide 2	3	3	3	1	3	3	3	0	0	0	1	0	0	1	2	3	3	1	1	2	1	1	1	0	0	0	0	0	0	1	0	0	0	0	0	0	0	1	0	0	1	0	0	0	0	1
AIMP2	Q13155	Aminoacyl tRNA synthase complex-interacting multifunctional protein 2 OS=Homo sapiens GN=AIMP2 PE=1 SV=2	Aminoacyl tRNA synthase complex-interacting multifunctional protein 2	3	3	3	1	3	3	3	1	0	2	2	2	0	2	3	3	3	0	1	0	0	0	0	0	0	0	0	0	0	0	0	1	0	0	0	0	0	0	2	0	0	0	0	0	0	0
AK1	P00568	Adenylate kinase isoenzyme 1 OS=Homo sapiens GN=AK1 PE=1 SV=3	Adenylate kinase isoenzyme 1	4	4	4	1	4	4	4	3	0	3	3	3	0	2	2	1	1	1	3	1	3	3	3	2	0	0	1	0	0	2	0	0	0	0	1	0	0	0	0	0	1	0	1	1	0	1
AK2	P54819	Adenylate kinase 2, mitochondrial OS=Homo sapiens GN=AK2 PE=1 SV=2	Adenylate kinase 2, mitochondrial;Adenylate kinase 2, mitochondrial, N-terminally processed	4	4	4	1	4	4	4	2	0	3	3	2	0	2	1	2	1	0	2	0	1	1	1	0	0	0	0	0	0	1	0	1	0	2	1	0	0	0	0	0	0	0	1	1	0	0
AKAP12	Q02952	A-kinase anchor protein 12 OS=Homo sapiens GN=AKAP12 PE=1 SV=4	A-kinase anchor protein 12	5	5	5	1	5	5	5	2	0	5	5	5	2	4	2	3	2	0	2	0	1	0	0	0	0	0	0	0	0	0	0	4	0	3	0	0	0	0	0	0	0	0	1	0	0	0
AKR1A1	P14550	Alcohol dehydrogenase [NADP(+)] OS=Homo sapiens GN=AKR1A1 PE=1 SV=3	Alcohol dehydrogenase [NADP(+)]	8	8	8	1	8	8	8	4	0	5	5	5	0	3	2	3	3	0	4	0	5	4	4	1	0	0	1	0	0	2	0	3	2	1	1	0	0	0	0	0	2	0	2	1	0	1
AKR1B1	P15121	Aldose reductase OS=Homo sapiens GN=AKR1B1 PE=1 SV=3	Aldose reductase	11;1	11;1	11;1	2	11	11	11	8	0	7	6	7	2	5	5	7	5	1	9	3	5	5	5	2	0	0	1	1	0	5	0	2	2	2	0	0	0	0	3	0	6	0	2	1	0	3
AKR1C4	P17516	Aldo-keto reductase family 1 member C4 OS=Homo sapiens GN=AKR1C4 PE=1 SV=3;Aldo-keto reductase family 1 member C1 OS=Homo sapiens GN=AKR1C1 PE=1 SV=1;Aldo-keto reductase family 1 member C2 OS=Homo sapiens GN=AKR1C2 PE=1 SV=3;Aldo-keto reductase family 1 me	Aldo-keto reductase family 1 member C4;Aldo-keto reductase family 1 member C1;Aldo-keto reductase family 1 member C2;Aldo-keto reductase family 1 member C3	2;1;1;1	2;1;1;1	2;1;1;1	4	2	2	2	0	0	0	0	0	0	0	0	0	0	0	0	0	0	0	0	0	0	0	0	1	0	0	0	0	0	0	1	0	0	0	0	0	0	0	1	1	0	0
ALCAM	Q13740	CD166 antigen OS=Homo sapiens GN=ALCAM PE=1 SV=2	CD166 antigen	16	16	16	1	16	16	16	14	1	9	10	14	4	8	10	10	7	0	14	1	9	11	11	6	1	0	3	0	0	13	0	3	0	2	0	0	0	2	4	0	10	0	11	11	1	9
ALDH1L1	O75891	Cytosolic 10-formyltetrahydrofolate dehydrogenase OS=Homo sapiens GN=ALDH1L1 PE=1 SV=2	Cytosolic 10-formyltetrahydrofolate dehydrogenase	3	3	3	1	3	3	3	0	0	0	0	0	0	0	2	2	1	0	0	0	0	0	0	0	0	0	3	0	0	1	0	0	0	0	0	0	1	0	0	0	1	0	0	0	0	1
ALDH2	P05091	Aldehyde dehydrogenase, mitochondrial OS=Homo sapiens GN=ALDH2 PE=1 SV=2	Aldehyde dehydrogenase, mitochondrial	3	3	3	1	3	3	3	3	0	2	2	3	0	2	1	3	2	0	2	2	2	3	2	0	0	0	0	0	0	3	1	0	0	0	0	0	0	0	2	0	2	0	1	1	0	1
ALDH7A1	P49419	Alpha-aminoadipic semialdehyde dehydrogenase OS=Homo sapiens GN=ALDH7A1 PE=1 SV=5	Alpha-aminoadipic semialdehyde dehydrogenase	3	3	3	1	3	3	3	2	0	2	2	2	0	2	2	3	2	2	2	2	1	1	2	1	0	0	1	0	0	2	1	0	0	0	0	0	0	0	0	0	2	0	0	0	0	0
ALDH9A1	P49189	4-trimethylaminobutyraldehyde dehydrogenase OS=Homo sapiens GN=ALDH9A1 PE=1 SV=3	4-trimethylaminobutyraldehyde dehydrogenase	9	9	9	1	9	9	9	6	3	7	7	7	5	6	7	9	7	1	5	3	6	6	4	5	0	0	4	3	0	5	4	4	0	3	0	0	0	2	4	0	6	0	3	2	0	3
ALDOA	P04075	Fructose-bisphosphate aldolase A OS=Homo sapiens GN=ALDOA PE=1 SV=2	Fructose-bisphosphate aldolase A	23	23	21	1	23	23	21	19	7	20	20	21	15	21	19	20	20	12	17	15	18	16	13	14	7	9	10	6	1	15	6	17	15	15	11	7	5	10	13	3	15	2	18	14	6	7
ALDOB	P05062	Fructose-bisphosphate aldolase B OS=Homo sapiens GN=ALDOB PE=1 SV=2	Fructose-bisphosphate aldolase B	2	2	2	1	2	2	2	0	0	0	0	0	0	0	1	0	0	0	0	0	0	0	0	0	0	0	2	0	0	0	0	0	0	0	0	0	0	0	0	0	0	0	0	0	0	1
ALDOC	P09972	Fructose-bisphosphate aldolase C OS=Homo sapiens GN=ALDOC PE=1 SV=2	Fructose-bisphosphate aldolase C	6	4	4	1	6	4	4	5	1	6	6	6	4	5	5	4	4	2	6	2	4	4	3	3	1	1	2	0	0	3	2	4	2	3	1	0	0	0	3	1	2	0	3	2	1	3
ALOX12B	O75342	Arachidonate 12-lipoxygenase, 12R-type OS=Homo sapiens GN=ALOX12B PE=1 SV=1	Arachidonate 12-lipoxygenase, 12R-type	12	12	12	1	12	12	12	9	7	9	9	8	6	10	8	6	8	10	10	12	11	10	10	11	1	3	4	5	3	11	8	4	1	5	2	0	1	1	8	3	10	0	8	10	1	10
ALOXE3	Q9BYJ1	Hydroperoxide isomerase ALOXE3 OS=Homo sapiens GN=ALOXE3 PE=1 SV=1	Hydroperoxide isomerase ALOXE3	2	2	2	1	2	2	2	2	0	0	0	1	0	2	1	0	2	2	2	2	2	2	2	2	1	1	0	0	1	2	2	0	0	0	0	0	0	0	1	0	2	0	1	2	1	2
AMY2B	P19961	Alpha-amylase 2B OS=Homo sapiens GN=AMY2B PE=1 SV=1;Pancreatic alpha-amylase OS=Homo sapiens GN=AMY2A PE=1 SV=2;Alpha-amylase 1 OS=Homo sapiens GN=AMY1A PE=1 SV=2	Alpha-amylase 2B;Pancreatic alpha-amylase;Alpha-amylase 1	6;6;6	6;6;6	5;5;5	3	6	6	5	4	2	2	4	3	2	3	3	3	3	4	3	3	3	6	5	5	0	0	2	2	1	3	3	3	0	2	0	0	0	0	4	0	4	0	3	3	0	2
ANGPTL2	Q9UKU9	Angiopoietin-related protein 2 OS=Homo sapiens GN=ANGPTL2 PE=2 SV=1	Angiopoietin-related protein 2	15;1;1	15;1;1	15;1;1	3	15	15	15	6	0	0	0	1	0	1	2	5	4	0	12	0	4	6	10	11	1	2	9	2	0	13	2	0	0	0	0	0	0	0	2	0	14	0	3	2	0	7
ANP32A	P39687	Acidic leucine-rich nuclear phosphoprotein 32 family member A OS=Homo sapiens GN=ANP32A PE=1 SV=1;Acidic leucine-rich nuclear phosphoprotein 32 family member B OS=Homo sapiens GN=ANP32B PE=1 SV=1	Acidic leucine-rich nuclear phosphoprotein 32 family member A;Acidic leucine-rich nuclear phosphoprotein 32 family member B	4;2;1	4;2;1	4;2;1	3	4	4	4	1	0	1	1	1	1	1	0	1	0	0	1	0	1	2	1	1	0	0	0	0	0	0	1	1	0	0	0	0	0	0	1	0	1	0	3	1	0	1
ANP32E	Q9BTT0	Acidic leucine-rich nuclear phosphoprotein 32 family member E OS=Homo sapiens GN=ANP32E PE=1 SV=1	Acidic leucine-rich nuclear phosphoprotein 32 family member E	2	2	2	1	2	2	2	0	0	2	2	2	0	2	2	2	2	0	0	1	0	0	0	0	0	0	0	0	0	0	0	0	0	0	0	0	0	0	0	0	0	0	0	0	0	0
ANPEP	P15144	Aminopeptidase N OS=Homo sapiens GN=ANPEP PE=1 SV=4	Aminopeptidase N	31	31	31	1	31	31	31	24	4	27	24	26	12	22	21	20	20	1	26	17	25	26	25	15	4	2	9	7	1	25	3	14	9	13	2	3	0	2	7	0	23	2	22	21	3	13
ANXA1	P04083	Annexin A1 OS=Homo sapiens GN=ANXA1 PE=1 SV=2	Annexin A1	26	26	26	1	26	26	26	24	7	24	25	25	15	23	18	18	17	12	24	13	21	21	17	15	5	2	7	5	2	19	10	20	15	14	8	6	5	8	9	4	19	2	19	17	4	15
ANXA11	P50995	Annexin A11 OS=Homo sapiens GN=ANXA11 PE=1 SV=1	Annexin A11	18;1	18;1	18;1	2	18	18	18	15	0	15	15	16	9	11	10	11	11	1	15	7	11	14	13	3	0	2	6	4	2	9	2	10	8	8	4	0	0	3	6	1	10	0	10	8	1	2
ANXA2	P07355	Annexin A2 OS=Homo sapiens GN=ANXA2 PE=1 SV=2;Putative annexin A2-like protein OS=Homo sapiens GN=ANXA2P2 PE=5 SV=2	Annexin A2;Putative annexin A2-like protein	33;24	33;24	33;24	2	33	33	33	33	25	33	33	33	30	32	31	31	29	25	33	28	30	30	29	27	11	16	24	17	10	31	21	28	27	28	21	15	15	16	22	15	31	9	28	28	15	25
ANXA3	P12429	Annexin A3 OS=Homo sapiens GN=ANXA3 PE=1 SV=3	Annexin A3	19	19	19	1	19	19	19	15	0	16	17	17	7	14	13	11	11	3	12	6	11	9	9	3	1	0	1	0	1	6	4	15	7	10	2	0	1	1	6	0	5	0	6	6	0	4
ANXA4	P09525	Annexin A4 OS=Homo sapiens GN=ANXA4 PE=1 SV=4	Annexin A4	19	19	19	1	19	19	19	16	4	17	17	18	11	15	10	10	9	4	17	7	15	14	11	9	1	1	1	2	1	11	4	14	13	12	7	3	1	2	5	3	9	1	9	8	0	4
ANXA5	P08758	Annexin A5 OS=Homo sapiens GN=ANXA5 PE=1 SV=2	Annexin A5	26	26	26	1	26	26	26	25	4	25	25	25	14	23	20	21	20	7	22	18	21	21	19	10	5	6	7	3	0	21	4	16	15	18	12	11	3	7	11	4	17	4	18	19	7	13
ANXA6	P08133	Annexin A6 OS=Homo sapiens GN=ANXA6 PE=1 SV=3	Annexin A6	50	50	50	1	50	50	50	43	4	45	43	42	33	43	38	38	36	4	43	31	38	39	30	23	2	3	10	5	1	35	3	35	29	31	22	7	7	11	12	1	29	4	38	37	10	25
ANXA7	P20073	Annexin A7 OS=Homo sapiens GN=ANXA7 PE=1 SV=3	Annexin A7	12	12	12	1	12	12	12	10	5	10	10	12	7	7	6	8	8	5	8	5	9	9	9	6	1	2	5	3	0	8	5	9	4	7	2	1	1	1	9	2	7	0	8	7	2	5
ANXA8L2	Q5VT79	Annexin A8-like protein 2 OS=Homo sapiens GN=ANXA8L2 PE=2 SV=1;Annexin A8-like protein 1 OS=Homo sapiens GN=ANXA8L1 PE=1 SV=1;Annexin A8 OS=Homo sapiens GN=ANXA8 PE=1 SV=3	Annexin A8-like protein 2;Annexin A8-like protein 1;Annexin A8	2;2;2	2;2;2	2;2;2	3	2	2	2	1	0	1	0	1	0	1	0	0	0	0	1	0	1	1	0	0	0	0	0	0	0	1	1	0	0	0	0	0	0	0	0	0	1	0	0	0	0	0
AP1B1	Q10567	AP-1 complex subunit beta-1 OS=Homo sapiens GN=AP1B1 PE=1 SV=2	AP-1 complex subunit beta-1	18	8	8	1	18	8	8	14	0	18	16	18	9	16	14	15	16	5	11	8	11	16	7	4	0	0	2	1	0	7	1	8	3	6	2	0	1	1	8	0	6	0	9	4	0	1
AP1G1	O43747	AP-1 complex subunit gamma-1 OS=Homo sapiens GN=AP1G1 PE=1 SV=5	AP-1 complex subunit gamma-1	3	3	3	1	3	3	3	2	0	2	2	2	0	2	2	2	2	0	2	1	2	2	0	0	0	0	0	0	0	0	0	0	0	0	0	0	0	0	0	0	0	0	0	0	0	0
AP1M1	Q9BXS5	AP-1 complex subunit mu-1 OS=Homo sapiens GN=AP1M1 PE=1 SV=3	AP-1 complex subunit mu-1	9;1	9;1	9;1	2	9	9	9	4	0	5	6	6	4	6	6	6	5	1	3	4	3	5	1	0	0	0	0	0	0	1	0	3	1	3	0	0	0	0	3	2	1	0	3	2	0	0
AP2A1	O95782	AP-2 complex subunit alpha-1 OS=Homo sapiens GN=AP2A1 PE=1 SV=3	AP-2 complex subunit alpha-1	16;6	16;6	16;6	2	16	16	16	10	1	13	13	12	3	13	6	13	11	1	12	6	9	9	6	1	0	0	3	2	0	11	1	1	2	2	1	1	0	1	3	0	4	2	2	1	0	1
AP2B1	P63010	AP-2 complex subunit beta OS=Homo sapiens GN=AP2B1 PE=1 SV=1	AP-2 complex subunit beta	20	20	10	1	20	20	10	16	0	19	19	19	8	16	13	17	15	4	15	7	11	15	11	4	0	1	5	2	0	11	3	8	4	6	3	0	1	1	7	0	8	0	9	6	0	3
AP2M1	Q96CW1	AP-2 complex subunit mu OS=Homo sapiens GN=AP2M1 PE=1 SV=2	AP-2 complex subunit mu	7	7	7	1	7	7	7	5	1	4	3	4	2	2	3	3	3	0	5	1	5	2	3	1	1	1	3	0	0	1	1	6	1	4	0	0	0	0	4	0	0	0	3	4	0	1
AP2S1	P53680	AP-2 complex subunit sigma OS=Homo sapiens GN=AP2S1 PE=1 SV=2	AP-2 complex subunit sigma	6	6	6	1	6	6	6	4	0	4	5	4	1	5	5	5	4	1	4	3	3	4	4	1	0	0	0	0	0	3	0	1	0	0	0	0	0	0	1	0	3	0	2	1	0	2
AP3B1	O00203	AP-3 complex subunit beta-1 OS=Homo sapiens GN=AP3B1 PE=1 SV=3	AP-3 complex subunit beta-1	8;1	8;1	8;1	2	8	8	8	2	0	4	5	5	0	3	2	8	6	0	2	1	3	3	1	0	0	0	0	0	0	0	0	0	0	1	0	0	0	0	1	0	0	0	1	0	0	1
AP3D1	O14617	AP-3 complex subunit delta-1 OS=Homo sapiens GN=AP3D1 PE=1 SV=1	AP-3 complex subunit delta-1	3	3	3	1	3	3	3	1	0	1	1	2	0	1	1	3	1	0	0	1	2	1	0	0	0	1	2	1	0	1	0	1	0	0	0	0	0	0	0	0	0	0	0	0	0	0
APEH	P13798	Acylamino-acid-releasing enzyme OS=Homo sapiens GN=APEH PE=1 SV=4	Acylamino-acid-releasing enzyme	8	8	8	1	8	8	8	7	2	8	8	8	2	7	8	8	8	5	6	6	8	8	8	6	0	0	2	0	0	7	3	3	3	3	1	0	0	1	5	0	6	1	5	4	0	5
APMAP	Q9HDC9	Adipocyte plasma membrane-associated protein OS=Homo sapiens GN=APMAP PE=1 SV=2	Adipocyte plasma membrane-associated protein	6	6	6	1	6	6	6	4	1	4	6	5	3	6	5	6	5	2	4	4	5	4	4	3	0	0	2	2	0	6	2	3	0	2	0	0	0	0	2	0	4	0	3	3	0	3
APOA1BP	Q8NCW5	NAD(P)H-hydrate epimerase OS=Homo sapiens GN=APOA1BP PE=1 SV=2	NAD(P)H-hydrate epimerase	2	2	2	1	2	2	2	1	0	1	1	1	1	1	1	1	1	0	1	1	1	1	1	1	0	0	0	0	0	1	1	1	1	1	1	0	0	0	1	0	1	0	2	2	0	2
APOB	P04114	Apolipoprotein B-100 OS=Homo sapiens GN=APOB PE=1 SV=2	Apolipoprotein B-100;Apolipoprotein B-48	5	3	3	1	5	3	3	5	0	4	5	5	2	4	3	3	3	0	5	0	5	5	5	3	0	0	3	0	0	4	0	0	1	0	0	0	0	0	1	0	4	0	3	3	0	3
APOD	P05090	Apolipoprotein D OS=Homo sapiens GN=APOD PE=1 SV=1	Apolipoprotein D	5	5	5	1	5	5	5	4	4	4	4	4	4	4	4	3	3	4	4	3	3	3	3	4	1	2	1	3	4	3	3	4	2	3	2	3	0	1	3	3	4	2	3	3	2	4
APOE	P02649	Apolipoprotein E OS=Homo sapiens GN=APOE PE=1 SV=1	Apolipoprotein E	15	15	11	1	15	15	11	12	4	9	11	13	7	13	11	15	13	4	12	5	11	12	11	6	1	1	12	4	0	10	2	5	1	4	1	1	0	2	6	0	8	0	8	8	0	9
APRT	P07741	Adenine phosphoribosyltransferase OS=Homo sapiens GN=APRT PE=1 SV=2	Adenine phosphoribosyltransferase	4	4	4	1	4	4	4	3	0	3	3	3	0	3	4	4	3	1	3	2	2	3	2	3	0	0	1	0	0	2	1	2	0	1	0	0	0	0	1	1	1	0	1	2	0	1
ARCN1	P48444	Coatomer subunit delta OS=Homo sapiens GN=ARCN1 PE=1 SV=1	Coatomer subunit delta	3	3	3	1	3	3	3	3	0	3	3	3	1	3	2	3	2	0	3	1	3	3	2	0	0	0	0	0	0	1	0	1	0	1	0	0	0	0	0	0	0	0	1	1	0	1
ARF1	P84077	ADP-ribosylation factor 1 OS=Homo sapiens GN=ARF1 PE=1 SV=2;ADP-ribosylation factor 3 OS=Homo sapiens GN=ARF3 PE=1 SV=2	ADP-ribosylation factor 1;ADP-ribosylation factor 3	10;10	10;10	5;5	2	10	10	5	10	2	9	9	8	5	9	6	9	8	4	8	6	7	5	4	3	1	2	5	2	1	7	3	5	6	5	4	4	2	4	4	1	7	2	6	5	1	5
ARF4	P18085	ADP-ribosylation factor 4 OS=Homo sapiens GN=ARF4 PE=1 SV=3	ADP-ribosylation factor 4	7	3	3	1	7	3	3	7	1	7	7	7	3	6	5	7	5	2	7	3	6	5	4	3	1	2	3	3	1	4	2	4	3	2	2	3	2	2	4	1	4	3	5	3	1	3
ARF5	P84085	ADP-ribosylation factor 5 OS=Homo sapiens GN=ARF5 PE=1 SV=2	ADP-ribosylation factor 5	7	2	2	1	7	2	2	6	1	6	6	5	3	4	4	5	3	3	6	3	5	4	4	2	1	2	3	2	1	4	3	3	4	3	3	3	1	3	4	1	4	2	5	3	1	3
ARF6	P62330	ADP-ribosylation factor 6 OS=Homo sapiens GN=ARF6 PE=1 SV=2	ADP-ribosylation factor 6	4	4	4	1	4	4	4	3	0	4	4	3	2	4	3	4	4	1	4	4	4	4	3	3	1	0	4	0	1	3	3	4	3	2	1	0	0	1	3	0	4	0	3	3	0	2
ARG1	P05089	Arginase-1 OS=Homo sapiens GN=ARG1 PE=1 SV=2	Arginase-1	12	12	12	1	12	12	12	10	7	11	9	10	4	10	8	10	9	7	10	8	7	8	7	7	5	7	10	8	5	8	8	5	3	7	3	4	4	3	9	7	9	5	11	11	5	11
ARHGAP1	Q07960	Rho GTPase-activating protein 1 OS=Homo sapiens GN=ARHGAP1 PE=1 SV=1	Rho GTPase-activating protein 1	8	8	8	1	8	8	8	8	0	7	6	7	1	5	3	6	6	1	7	3	7	6	6	2	0	0	1	1	0	5	0	2	1	1	0	0	0	0	1	0	5	0	5	4	0	3
ARHGDIA	P52565	Rho GDP-dissociation inhibitor 1 OS=Homo sapiens GN=ARHGDIA PE=1 SV=3	Rho GDP-dissociation inhibitor 1	9	9	9	1	9	9	9	8	1	7	7	8	5	7	7	8	7	2	7	5	4	4	4	4	1	1	4	0	0	7	1	4	3	4	3	1	0	1	3	1	7	0	8	7	1	6
ARHGEF1	Q92888	Rho guanine nucleotide exchange factor 1 OS=Homo sapiens GN=ARHGEF1 PE=1 SV=2	Rho guanine nucleotide exchange factor 1	2	2	2	1	2	2	2	1	0	1	1	1	0	1	0	2	0	0	1	1	1	1	0	0	0	0	0	0	0	0	0	0	0	0	0	0	0	0	0	0	0	0	0	0	0	0
ARL1	P40616	ADP-ribosylation factor-like protein 1 OS=Homo sapiens GN=ARL1 PE=1 SV=1	ADP-ribosylation factor-like protein 1	4	4	4	1	4	4	4	3	0	4	4	4	1	3	4	3	4	0	3	3	3	3	3	1	0	0	1	0	0	2	1	2	1	1	1	0	0	1	0	0	1	0	0	1	0	1
ARL15	Q9NXU5	ADP-ribosylation factor-like protein 15 OS=Homo sapiens GN=ARL15 PE=1 SV=1	ADP-ribosylation factor-like protein 15	2	2	2	1	2	2	2	2	0	2	2	2	0	1	0	2	1	0	2	0	2	2	2	0	0	0	0	0	0	0	0	0	0	0	0	0	0	0	1	0	0	0	1	1	0	1
ARL3	P36405	ADP-ribosylation factor-like protein 3 OS=Homo sapiens GN=ARL3 PE=1 SV=2	ADP-ribosylation factor-like protein 3	4	4	4	1	4	4	4	3	0	3	4	3	0	2	3	4	4	0	3	1	4	3	2	0	0	0	0	0	0	2	0	0	0	1	1	0	0	0	1	0	1	0	0	0	0	0
ARL6IP5	O75915	PRA1 family protein 3 OS=Homo sapiens GN=ARL6IP5 PE=1 SV=1	PRA1 family protein 3	3	3	3	1	3	3	3	2	0	2	1	2	0	2	1	2	2	0	2	2	3	2	2	1	0	0	1	0	0	2	0	0	0	1	0	0	0	0	0	0	3	0	2	1	0	1
ARL8A	Q96BM9	ADP-ribosylation factor-like protein 8A OS=Homo sapiens GN=ARL8A PE=1 SV=1	ADP-ribosylation factor-like protein 8A	3	2	2	1	3	2	2	2	0	3	3	3	2	3	3	2	2	0	3	1	2	2	1	1	0	0	0	1	0	3	0	1	1	1	0	0	0	0	0	0	2	0	1	1	0	2
ARL8B	Q9NVJ2	ADP-ribosylation factor-like protein 8B OS=Homo sapiens GN=ARL8B PE=1 SV=1	ADP-ribosylation factor-like protein 8B	3	3	2	1	3	3	2	3	0	3	3	3	2	2	2	3	3	0	3	0	2	2	1	2	0	0	0	1	0	3	0	1	2	1	0	0	0	0	0	0	2	0	1	1	1	0
ARPC1A	Q92747	Actin-related protein 2/3 complex subunit 1A OS=Homo sapiens GN=ARPC1A PE=1 SV=2	Actin-related protein 2/3 complex subunit 1A	5	4	4	1	5	4	4	5	0	5	5	5	1	3	3	5	4	0	4	1	1	1	1	1	0	0	1	0	0	1	0	2	0	2	0	0	0	0	0	0	1	0	3	3	0	3
ARPC1B	O15143	Actin-related protein 2/3 complex subunit 1B OS=Homo sapiens GN=ARPC1B PE=1 SV=3	Actin-related protein 2/3 complex subunit 1B	8	8	7	1	8	8	7	7	0	7	7	7	2	5	4	7	5	0	6	3	3	3	3	2	0	0	2	0	0	4	0	2	0	3	0	0	0	0	2	0	4	0	3	3	0	4
ARPC2	O15144	Actin-related protein 2/3 complex subunit 2 OS=Homo sapiens GN=ARPC2 PE=1 SV=1	Actin-related protein 2/3 complex subunit 2	12	12	12	1	12	12	12	9	0	10	8	10	4	8	7	9	7	3	8	3	6	6	5	3	0	0	2	2	0	7	1	4	2	2	0	0	0	0	3	0	4	0	6	5	0	4
ARPC3	O15145	Actin-related protein 2/3 complex subunit 3 OS=Homo sapiens GN=ARPC3 PE=1 SV=3	Actin-related protein 2/3 complex subunit 3	4	4	4	1	4	4	4	3	0	3	4	3	1	4	4	4	3	1	3	2	3	4	4	1	0	0	1	1	0	2	0	2	1	2	0	1	0	2	1	0	2	0	3	3	0	2
ARPC4	P59998	Actin-related protein 2/3 complex subunit 4 OS=Homo sapiens GN=ARPC4 PE=1 SV=3	Actin-related protein 2/3 complex subunit 4	5	5	5	1	5	5	5	5	0	5	4	5	3	4	4	4	4	3	5	4	4	4	3	4	2	1	2	0	0	4	1	3	1	2	2	1	1	2	2	0	4	0	5	5	0	3
ARPC5	O15511	Actin-related protein 2/3 complex subunit 5 OS=Homo sapiens GN=ARPC5 PE=1 SV=3	Actin-related protein 2/3 complex subunit 5	4	4	4	1	4	4	4	2	0	4	2	3	3	3	4	4	3	1	2	3	4	4	3	2	0	0	1	0	0	3	0	2	0	1	0	0	0	0	1	0	3	0	2	2	0	0
ARPC5L	Q9BPX5	Actin-related protein 2/3 complex subunit 5-like protein OS=Homo sapiens GN=ARPC5L PE=1 SV=1	Actin-related protein 2/3 complex subunit 5-like protein	2	2	2	1	2	2	2	2	0	2	2	2	0	2	2	2	1	0	1	1	2	1	2	0	0	0	0	0	0	1	0	0	0	0	0	0	0	0	0	0	0	0	0	0	0	0
ARSA	P15289	Arylsulfatase A OS=Homo sapiens GN=ARSA PE=1 SV=3	Arylsulfatase A;Arylsulfatase A component B;Arylsulfatase A component C	4	4	4	1	4	4	4	3	0	3	3	3	1	3	3	3	3	1	3	3	2	3	1	1	0	1	0	0	0	3	0	0	0	0	0	0	0	0	1	0	3	0	2	1	0	1
ASAH1	Q13510	Acid ceramidase OS=Homo sapiens GN=ASAH1 PE=1 SV=5	Acid ceramidase;Acid ceramidase subunit alpha;Acid ceramidase subunit beta	6	6	6	1	6	6	6	4	4	4	4	5	3	6	5	4	4	3	6	6	6	5	5	6	1	1	3	1	1	5	3	1	1	3	1	2	1	0	3	1	4	2	5	5	1	5
ASNA1	O43681	ATPase ASNA1 OS=Homo sapiens GN=ASNA1 PE=1 SV=2	ATPase ASNA1	5	5	5	1	5	5	5	5	0	3	3	3	0	3	2	5	4	0	4	2	1	4	2	0	0	0	0	0	0	1	0	0	0	0	0	0	0	0	0	0	1	0	0	0	0	0
ASNS	P08243	Asparagine synthetase [glutamine-hydrolyzing] OS=Homo sapiens GN=ASNS PE=1 SV=4	Asparagine synthetase [glutamine-hydrolyzing]	8	8	8	1	8	8	8	3	0	5	4	6	0	3	6	7	5	0	5	2	4	3	2	0	1	1	1	0	0	0	0	2	0	0	0	0	0	0	2	1	1	0	1	1	0	1
ASPH	Q12797	Aspartyl/asparaginyl beta-hydroxylase OS=Homo sapiens GN=ASPH PE=1 SV=3	Aspartyl/asparaginyl beta-hydroxylase	2	2	2	1	2	2	2	1	0	1	0	2	1	1	1	2	1	0	2	1	2	2	2	1	0	0	0	0	0	1	0	2	0	0	0	0	0	0	0	0	1	0	1	1	0	1
ATG3	Q9NT62	Ubiquitin-like-conjugating enzyme ATG3 OS=Homo sapiens GN=ATG3 PE=1 SV=1	Ubiquitin-like-conjugating enzyme ATG3	2	2	2	1	2	2	2	1	0	2	2	2	0	2	2	2	2	0	1	0	1	1	1	1	0	0	0	0	0	1	0	0	0	0	0	0	0	0	1	0	0	0	0	1	0	1
ATG9A	Q7Z3C6	Autophagy-related protein 9A OS=Homo sapiens GN=ATG9A PE=1 SV=3	Autophagy-related protein 9A	2	2	2	1	2	2	2	1	0	2	2	1	0	1	1	2	2	0	2	1	1	1	1	0	0	0	0	0	0	0	0	0	0	0	0	0	0	0	0	0	0	0	0	0	0	0
ATIC	P31939	Bifunctional purine biosynthesis protein PURH OS=Homo sapiens GN=ATIC PE=1 SV=3	Bifunctional purine biosynthesis protein PURH;Phosphoribosylaminoimidazolecarboxamide formyltransferase;IMP cyclohydrolase	18	18	18	1	18	18	18	14	1	16	16	16	7	14	11	17	14	0	15	10	13	13	9	1	0	0	4	2	0	6	0	6	3	6	3	0	1	3	6	0	2	0	5	2	0	2
ATL3	Q6DD88	Atlastin-3 OS=Homo sapiens GN=ATL3 PE=1 SV=1	Atlastin-3	6	6	6	1	6	6	6	4	0	5	4	5	2	4	4	6	3	0	4	1	1	1	1	1	0	0	2	0	0	3	1	3	1	4	1	0	0	1	0	0	2	0	3	3	0	1
ATP11C	Q8NB49	Phospholipid-transporting ATPase IG OS=Homo sapiens GN=ATP11C PE=1 SV=3	Phospholipid-transporting ATPase IG	6	6	6	1	6	6	6	3	0	4	4	4	0	1	1	1	1	0	2	0	3	3	2	0	0	0	0	0	0	1	0	1	1	0	0	0	0	0	0	0	1	0	1	2	0	0
ATP1A1	P05023	Sodium/potassium-transporting ATPase subunit alpha-1 OS=Homo sapiens GN=ATP1A1 PE=1 SV=1	Sodium/potassium-transporting ATPase subunit alpha-1	46;15;8;4;4	46;15;8;4;4	28;1;0;0;0	5	46	46	28	39	4	42	42	43	32	36	36	40	39	16	36	28	32	35	30	22	6	5	21	2	0	33	2	33	27	30	17	7	8	13	25	4	26	2	34	32	2	20
ATP1B1	P05026	Sodium/potassium-transporting ATPase subunit beta-1 OS=Homo sapiens GN=ATP1B1 PE=1 SV=1	Sodium/potassium-transporting ATPase subunit beta-1	6	6	6	1	6	6	6	6	0	6	6	6	3	6	6	5	5	1	6	1	6	6	5	3	1	0	2	0	0	5	0	4	3	4	3	0	1	1	3	0	3	0	3	2	0	2
ATP1B3	P54709	Sodium/potassium-transporting ATPase subunit beta-3 OS=Homo sapiens GN=ATP1B3 PE=1 SV=1	Sodium/potassium-transporting ATPase subunit beta-3	15	15	15	1	15	15	15	12	3	14	12	14	6	10	7	10	12	6	11	9	7	11	7	4	0	1	1	0	1	10	1	7	4	5	2	2	2	3	7	0	6	0	9	7	2	8
ATP2A2	P16615	Sarcoplasmic/endoplasmic reticulum calcium ATPase 2 OS=Homo sapiens GN=ATP2A2 PE=1 SV=1	Sarcoplasmic/endoplasmic reticulum calcium ATPase 2	17;6;3	17;6;3	17;6;3	3	17	17	17	13	0	13	13	16	2	13	14	16	15	3	10	4	11	9	10	2	0	0	4	0	0	10	2	4	0	3	0	1	0	0	2	0	5	0	5	4	0	3
ATP2B1	P20020	Plasma membrane calcium-transporting ATPase 1 OS=Homo sapiens GN=ATP2B1 PE=1 SV=3	Plasma membrane calcium-transporting ATPase 1	23;9	11;1	11;1	2	23	11	11	20	1	19	19	19	8	14	8	13	11	2	19	4	18	18	15	7	0	0	7	1	0	19	1	11	5	9	2	2	0	4	6	0	14	0	15	11	1	5
ATP2B4	P23634	Plasma membrane calcium-transporting ATPase 4 OS=Homo sapiens GN=ATP2B4 PE=1 SV=2	Plasma membrane calcium-transporting ATPase 4	28;10	28;10	16;1	2	28	28	16	24	1	23	25	25	11	17	11	18	17	2	23	6	21	20	19	17	0	0	18	3	0	24	2	15	10	10	2	4	2	5	8	1	20	0	19	14	1	13
ATP5A1	P25705	ATP synthase subunit alpha, mitochondrial OS=Homo sapiens GN=ATP5A1 PE=1 SV=1	ATP synthase subunit alpha, mitochondrial	19	19	19	1	19	19	19	13	2	8	8	12	4	16	17	19	15	6	13	16	10	14	13	10	0	0	8	4	1	16	4	2	1	2	1	3	4	4	6	1	11	2	6	4	0	7
ATP5B	P06576	ATP synthase subunit beta, mitochondrial OS=Homo sapiens GN=ATP5B PE=1 SV=3	ATP synthase subunit beta, mitochondrial	20	20	20	1	20	20	20	16	1	17	15	18	4	13	16	20	17	10	17	14	13	12	12	8	2	3	6	3	1	14	8	1	2	0	0	1	1	10	7	1	14	0	10	11	0	9
ATP5C1	P36542	ATP synthase subunit gamma, mitochondrial OS=Homo sapiens GN=ATP5C1 PE=1 SV=1	ATP synthase subunit gamma, mitochondrial	3	3	3	1	3	3	3	1	0	0	0	1	0	1	2	3	3	1	0	1	1	1	0	0	0	0	0	0	0	0	0	0	0	0	0	0	0	0	0	0	0	0	0	0	0	0
ATP5D	P30049	ATP synthase subunit delta, mitochondrial OS=Homo sapiens GN=ATP5D PE=1 SV=2	ATP synthase subunit delta, mitochondrial	2	2	2	1	2	2	2	1	0	1	1	1	1	1	1	1	1	0	1	0	1	0	1	0	0	0	0	0	0	0	0	1	0	1	0	0	0	1	0	0	1	0	0	0	0	0
ATP5F1	P24539	ATP synthase F(0) complex subunit B1, mitochondrial OS=Homo sapiens GN=ATP5F1 PE=1 SV=2	ATP synthase F(0) complex subunit B1, mitochondrial	4	4	4	1	4	4	4	3	0	0	0	0	0	4	4	4	4	0	4	1	1	0	1	0	0	0	1	0	0	3	0	0	0	0	0	0	0	0	0	0	1	0	0	0	0	0
ATP5H	O75947	ATP synthase subunit d, mitochondrial OS=Homo sapiens GN=ATP5H PE=1 SV=3	ATP synthase subunit d, mitochondrial	7	7	7	1	7	7	7	1	1	1	2	2	3	6	6	7	5	0	1	0	1	2	2	2	0	0	1	0	0	1	0	0	0	2	0	0	0	0	1	0	1	0	2	2	0	1
ATP5J	P18859	ATP synthase-coupling factor 6, mitochondrial OS=Homo sapiens GN=ATP5J PE=1 SV=1	ATP synthase-coupling factor 6, mitochondrial	2	2	2	1	2	2	2	0	0	0	0	0	0	2	1	2	1	0	0	1	0	0	0	1	0	0	1	0	0	1	0	0	0	0	0	0	0	1	0	0	1	0	0	0	0	0
ATP5O	P48047	ATP synthase subunit O, mitochondrial OS=Homo sapiens GN=ATP5O PE=1 SV=1	ATP synthase subunit O, mitochondrial	4	4	4	1	4	4	4	2	0	1	1	1	0	2	2	4	3	0	3	0	0	1	0	1	0	0	0	0	0	1	0	0	0	0	0	0	0	0	0	0	0	0	1	0	0	0
ATP6AP1	Q15904	V-type proton ATPase subunit S1 OS=Homo sapiens GN=ATP6AP1 PE=1 SV=2	V-type proton ATPase subunit S1	2	2	2	1	2	2	2	1	1	2	2	2	2	2	2	2	1	1	2	2	1	1	2	1	0	0	0	0	0	2	1	1	0	1	0	0	0	0	0	0	1	0	0	0	0	0
ATP6AP2	O75787	Renin receptor OS=Homo sapiens GN=ATP6AP2 PE=1 SV=2	Renin receptor	2	2	2	1	2	2	2	2	0	2	2	2	2	2	2	2	2	1	2	2	2	2	2	1	0	0	0	0	0	2	1	1	0	1	0	0	0	0	0	0	2	0	0	0	0	1
ATP6V0A1	Q93050	V-type proton ATPase 116 kDa subunit a isoform 1 OS=Homo sapiens GN=ATP6V0A1 PE=2 SV=3	V-type proton ATPase 116 kDa subunit a isoform 1	3	3	3	1	3	3	3	2	0	2	3	3	1	2	1	3	2	1	1	2	3	2	2	3	0	0	3	1	0	3	1	1	0	1	0	0	0	1	2	0	1	0	1	1	0	1
ATP6V0C	P27449	V-type proton ATPase 16 kDa proteolipid subunit OS=Homo sapiens GN=ATP6V0C PE=1 SV=1	V-type proton ATPase 16 kDa proteolipid subunit	2	2	2	1	2	2	2	1	1	1	1	1	1	1	1	2	1	1	1	1	1	1	1	1	0	0	1	1	0	1	0	1	0	0	0	0	0	0	0	0	2	0	0	0	0	0
ATP6V0D1	P61421	V-type proton ATPase subunit d 1 OS=Homo sapiens GN=ATP6V0D1 PE=1 SV=1	V-type proton ATPase subunit d 1	5	5	5	1	5	5	5	1	0	4	3	5	3	1	4	4	2	0	2	2	3	3	1	1	0	1	2	0	1	1	0	1	1	1	1	1	0	0	1	0	2	1	1	2	0	1
ATP6V1A	P38606	V-type proton ATPase catalytic subunit A OS=Homo sapiens GN=ATP6V1A PE=1 SV=2	V-type proton ATPase catalytic subunit A	24	24	24	1	24	24	24	19	2	19	17	22	8	18	15	21	19	4	17	13	12	12	12	4	0	0	4	2	1	11	2	7	7	9	1	0	1	2	7	0	11	2	6	8	0	5
ATP6V1B2	P21281	V-type proton ATPase subunit B, brain isoform OS=Homo sapiens GN=ATP6V1B2 PE=1 SV=3	V-type proton ATPase subunit B, brain isoform	15;4	15;4	15;4	2	15	15	15	10	0	14	13	14	5	12	13	12	12	2	7	9	10	9	9	2	0	0	1	0	0	9	0	7	6	6	4	3	0	0	8	0	5	1	7	3	1	3
ATP6V1C1	P21283	V-type proton ATPase subunit C 1 OS=Homo sapiens GN=ATP6V1C1 PE=1 SV=4	V-type proton ATPase subunit C 1	2	2	2	1	2	2	2	1	0	2	2	2	1	2	2	2	2	0	1	1	1	2	1	0	0	0	0	0	0	1	0	1	1	1	0	0	0	0	2	0	1	0	0	0	0	0
ATP6V1E1	P36543	V-type proton ATPase subunit E 1 OS=Homo sapiens GN=ATP6V1E1 PE=1 SV=1	V-type proton ATPase subunit E 1	5;2	5;2	5;2	2	5	5	5	2	0	4	3	4	3	4	4	4	3	2	1	3	1	1	2	1	0	1	1	0	0	2	1	2	1	3	2	0	1	0	3	0	2	1	2	2	0	2
ATP6V1F	Q16864	V-type proton ATPase subunit F OS=Homo sapiens GN=ATP6V1F PE=1 SV=2	V-type proton ATPase subunit F	4	4	4	1	4	4	4	3	0	3	4	4	0	4	4	4	4	1	3	2	2	2	1	0	0	0	0	0	0	3	0	0	0	1	0	0	0	0	0	0	2	0	0	0	0	0
ATP6V1G1	O75348	V-type proton ATPase subunit G 1 OS=Homo sapiens GN=ATP6V1G1 PE=1 SV=3	V-type proton ATPase subunit G 1	4	4	4	1	4	4	4	1	0	2	1	2	1	1	1	3	1	0	1	1	2	2	1	0	0	0	0	0	0	1	0	2	0	2	1	0	0	0	2	0	0	0	1	2	0	1
ATP6V1H	Q9UI12	V-type proton ATPase subunit H OS=Homo sapiens GN=ATP6V1H PE=1 SV=1	V-type proton ATPase subunit H	5	5	5	1	5	5	5	4	0	4	3	4	1	4	4	4	5	0	4	2	4	3	4	1	0	0	0	0	0	2	0	2	0	0	0	0	0	0	2	0	3	0	2	2	0	2
ATXN2L	Q8WWM7	Ataxin-2-like protein OS=Homo sapiens GN=ATXN2L PE=1 SV=2	Ataxin-2-like protein	2	2	2	1	2	2	2	1	0	2	2	1	1	0	0	2	2	0	1	0	0	1	0	0	0	0	0	0	0	0	0	1	0	1	0	0	0	0	1	1	0	0	0	0	0	0
AXL	P30530	Tyrosine-protein kinase receptor UFO OS=Homo sapiens GN=AXL PE=1 SV=3	Tyrosine-protein kinase receptor UFO	5	5	5	1	5	5	5	3	0	0	1	0	0	0	0	0	1	0	3	0	2	2	3	0	0	0	1	0	0	3	0	0	0	0	0	0	0	0	0	0	2	0	1	1	0	0
AZGP1	P25311	Zinc-alpha-2-glycoprotein OS=Homo sapiens GN=AZGP1 PE=1 SV=2	Zinc-alpha-2-glycoprotein	15	15	15	1	15	15	15	8	8	12	8	10	8	11	12	8	10	10	10	12	9	11	11	12	4	7	9	7	11	12	10	8	5	8	4	4	5	6	8	7	11	4	13	12	8	13
B2M	P61769	Beta-2-microglobulin OS=Homo sapiens GN=B2M PE=1 SV=1	Beta-2-microglobulin;Beta-2-microglobulin form pI 5.3	3	3	3	1	3	3	3	3	2	3	3	2	2	3	2	2	3	1	3	2	3	3	2	2	1	1	2	2	0	3	1	2	1	2	1	0	0	1	1	0	3	0	2	2	1	2
BAG2	O95816	BAG family molecular chaperone regulator 2 OS=Homo sapiens GN=BAG2 PE=1 SV=1	BAG family molecular chaperone regulator 2	3	3	3	1	3	3	3	3	0	2	2	2	0	1	2	3	3	0	3	2	2	2	1	1	0	0	1	0	0	2	0	0	0	0	0	0	0	0	2	0	2	0	2	1	0	0
BAG3	O95817	BAG family molecular chaperone regulator 3 OS=Homo sapiens GN=BAG3 PE=1 SV=3	BAG family molecular chaperone regulator 3	4	4	4	1	4	4	4	3	0	3	3	3	0	3	3	3	3	0	1	1	2	3	2	0	0	0	0	0	0	3	0	2	1	1	2	0	0	0	2	0	1	0	3	2	0	1
BAG6	P46379	Large proline-rich protein BAG6 OS=Homo sapiens GN=BAG6 PE=1 SV=2	Large proline-rich protein BAG6	11	11	11	1	11	11	11	4	0	8	3	8	2	4	4	10	8	0	3	4	2	4	3	0	0	1	0	0	0	1	0	3	2	1	0	1	1	1	3	0	0	1	2	2	1	0
BANF1	O75531	Barrier-to-autointegration factor OS=Homo sapiens GN=BANF1 PE=1 SV=1	Barrier-to-autointegration factor;Barrier-to-autointegration factor, N-terminally processed	4	4	4	1	4	4	4	3	0	2	2	2	1	2	1	4	3	1	3	3	1	2	0	0	0	0	2	1	0	1	1	2	0	0	0	0	0	1	1	0	0	0	0	1	0	2
BASP1	P80723	Brain acid soluble protein 1 OS=Homo sapiens GN=BASP1 PE=1 SV=2	Brain acid soluble protein 1	16	16	16	1	16	16	16	13	2	13	14	14	14	14	12	12	11	2	13	4	10	10	10	7	4	3	6	6	1	11	3	14	13	14	6	2	1	5	2	0	10	0	12	11	4	4
BAX	Q07812	Apoptosis regulator BAX OS=Homo sapiens GN=BAX PE=1 SV=1	Apoptosis regulator BAX	3	3	3	1	3	3	3	2	0	1	1	2	1	0	1	2	2	0	2	1	2	1	0	0	0	0	2	0	0	2	0	1	0	0	1	0	0	0	0	0	0	0	0	0	0	0
BCAM	P50895	Basal cell adhesion molecule OS=Homo sapiens GN=BCAM PE=1 SV=2	Basal cell adhesion molecule	4	4	4	1	4	4	4	4	0	3	3	4	0	2	2	1	2	0	4	0	4	4	3	2	0	0	0	1	0	2	0	0	0	0	0	0	0	1	0	0	1	1	2	2	0	1
BCAP31	P51572	B-cell receptor-associated protein 31 OS=Homo sapiens GN=BCAP31 PE=1 SV=3	B-cell receptor-associated protein 31	6	6	6	1	6	6	6	5	2	5	5	5	4	5	5	5	3	1	5	4	5	4	4	4	0	0	3	2	0	5	0	4	1	4	0	0	0	0	3	0	4	0	4	4	1	2
BCAT1	P54687	Branched-chain-amino-acid aminotransferase, cytosolic OS=Homo sapiens GN=BCAT1 PE=1 SV=3	Branched-chain-amino-acid aminotransferase, cytosolic	2	2	2	1	2	2	2	2	0	2	2	2	0	2	1	2	2	0	2	0	1	2	2	0	0	0	1	0	0	2	0	0	0	0	0	0	0	0	0	0	0	0	0	0	0	0
BCCIP	Q9P287	BRCA2 and CDKN1A-interacting protein OS=Homo sapiens GN=BCCIP PE=1 SV=1	BRCA2 and CDKN1A-interacting protein	2	2	2	1	2	2	2	1	0	2	2	2	0	2	1	2	2	0	1	1	1	0	0	0	0	0	0	0	0	0	0	0	0	0	0	0	0	0	0	0	0	0	0	0	0	0
BHMT2	Q9H2M3	S-methylmethionine--homocysteine S-methyltransferase BHMT2 OS=Homo sapiens GN=BHMT2 PE=1 SV=1;Betaine--homocysteine S-methyltransferase 1 OS=Homo sapiens GN=BHMT PE=1 SV=2	S-methylmethionine--homocysteine S-methyltransferase BHMT2;Betaine--homocysteine S-methyltransferase 1	2;2	2;2	2;2	2	2	2	2	0	0	0	0	0	0	1	1	0	0	0	0	0	0	0	0	0	0	0	2	0	1	0	0	0	0	0	0	0	0	0	0	0	0	0	0	1	0	1
BICD2	Q8TD16	Protein bicaudal D homolog 2 OS=Homo sapiens GN=BICD2 PE=1 SV=1	Protein bicaudal D homolog 2	7	7	7	1	7	7	7	1	0	1	1	2	1	4	4	5	4	0	1	3	2	2	0	1	0	0	0	0	0	0	1	0	1	0	3	1	0	1	3	1	0	0	2	1	0	1
BIN1	O00499	Myc box-dependent-interacting protein 1 OS=Homo sapiens GN=BIN1 PE=1 SV=1	Myc box-dependent-interacting protein 1	2	2	2	1	2	2	2	2	0	2	2	2	0	1	1	2	1	0	1	0	1	1	1	0	0	0	0	0	0	1	0	1	0	0	0	0	0	0	0	0	1	0	1	0	0	0
BLMH	Q13867	Bleomycin hydrolase OS=Homo sapiens GN=BLMH PE=1 SV=1	Bleomycin hydrolase	11	11	11	1	11	11	11	7	5	7	9	7	3	10	8	8	8	9	10	9	7	10	9	10	5	4	5	4	4	9	8	5	3	5	3	1	2	1	7	5	10	1	8	8	5	6
BLVRA	P53004	Biliverdin reductase A OS=Homo sapiens GN=BLVRA PE=1 SV=2	Biliverdin reductase A	4	4	4	1	4	4	4	4	0	4	4	4	1	2	2	3	4	0	4	2	4	3	2	0	0	0	1	1	0	2	0	1	1	1	0	0	0	1	1	0	0	0	2	1	0	0
BLVRB	P30043	Flavin reductase (NADPH) OS=Homo sapiens GN=BLVRB PE=1 SV=3	Flavin reductase (NADPH)	2	2	2	1	2	2	2	1	0	1	1	1	0	1	0	1	1	0	1	1	0	0	1	0	0	0	0	0	0	0	0	0	0	0	0	0	0	0	2	0	0	0	1	1	0	1
BMP1	P13497	Bone morphogenetic protein 1 OS=Homo sapiens GN=BMP1 PE=1 SV=2;Tolloid-like protein 1 OS=Homo sapiens GN=TLL1 PE=1 SV=1;Tolloid-like protein 2 OS=Homo sapiens GN=TLL2 PE=1 SV=1	Bone morphogenetic protein 1;Tolloid-like protein 1;Tolloid-like protein 2	2;1;1	2;1;1	2;1;1	3	2	2	2	0	0	0	0	0	0	0	0	2	0	0	0	0	0	0	0	0	0	0	2	0	0	0	0	0	0	0	0	0	0	1	0	0	1	0	0	0	0	0
BMS1	Q14692	Ribosome biogenesis protein BMS1 homolog OS=Homo sapiens GN=BMS1 PE=1 SV=1	Ribosome biogenesis protein BMS1 homolog	2	2	2	1	2	2	2	0	0	0	0	0	0	0	0	0	0	0	0	0	0	0	0	0	0	0	1	1	0	0	0	0	0	0	0	0	0	0	1	0	0	0	1	0	0	0
BOLA2	Q9H3K6	BolA-like protein 2 OS=Homo sapiens GN=BOLA2 PE=1 SV=1	BolA-like protein 2	2	2	2	1	2	2	2	2	0	2	2	2	2	2	2	2	2	0	2	2	1	2	1	0	0	0	0	0	0	1	0	2	0	2	0	0	0	0	1	0	0	0	2	1	0	1
BOP1	Q14137	Ribosome biogenesis protein BOP1 OS=Homo sapiens GN=BOP1 PE=1 SV=2	Ribosome biogenesis protein BOP1	3	3	3	1	3	3	3	0	0	0	0	0	0	0	0	3	2	0	0	0	0	0	0	0	0	0	0	0	0	0	0	0	0	0	0	0	0	0	0	0	0	0	0	0	0	0
BPIFB1	Q8TDL5	BPI fold-containing family B member 1 OS=Homo sapiens GN=BPIFB1 PE=1 SV=1	BPI fold-containing family B member 1	8	8	8	1	8	8	8	2	2	1	1	1	1	3	3	0	1	1	2	2	3	3	4	3	0	0	0	1	1	2	2	1	1	1	1	0	0	0	2	0	1	0	1	1	0	2
BPIFB4	P59827	BPI fold-containing family B member 4 OS=Homo sapiens GN=BPIFB4 PE=2 SV=2	BPI fold-containing family B member 4	2	2	2	1	2	2	2	0	0	0	0	0	0	0	0	0	0	0	0	0	0	0	0	0	0	0	0	0	0	0	0	1	0	0	0	1	0	0	1	0	0	0	0	1	0	1
BPNT1	O95861	3(2),5-bisphosphate nucleotidase 1 OS=Homo sapiens GN=BPNT1 PE=1 SV=1	3(2),5-bisphosphate nucleotidase 1	3	3	3	1	3	3	3	2	0	3	3	3	0	3	2	1	0	0	0	0	1	2	1	0	0	0	0	0	0	1	0	0	0	0	0	0	0	0	0	0	0	0	2	1	0	0
BRIX1	Q8TDN6	Ribosome biogenesis protein BRX1 homolog OS=Homo sapiens GN=BRIX1 PE=1 SV=2	Ribosome biogenesis protein BRX1 homolog	2	2	2	1	2	2	2	0	0	0	0	0	0	0	0	1	1	1	0	0	0	0	0	0	0	0	0	0	0	0	0	0	0	0	0	0	0	0	0	0	0	0	0	0	0	0
BRK1	Q8WUW1	Protein BRICK1 OS=Homo sapiens GN=BRK1 PE=1 SV=1	Protein BRICK1	3	3	3	1	3	3	3	3	0	3	3	3	2	2	2	3	3	1	3	1	3	3	2	0	0	0	1	0	0	1	0	0	0	0	0	0	0	0	1	0	2	0	0	0	0	0
BROX	Q5VW32	BRO1 domain-containing protein BROX OS=Homo sapiens GN=BROX PE=1 SV=1	BRO1 domain-containing protein BROX	3	3	3	1	3	3	3	2	0	2	2	2	0	1	1	1	1	0	3	0	2	2	1	0	0	0	0	0	0	1	0	0	0	1	0	0	0	0	0	0	1	0	0	0	0	0
BSG	P35613	Basigin OS=Homo sapiens GN=BSG PE=1 SV=2	Basigin	7	7	7	1	7	7	7	7	4	7	7	7	6	7	7	6	7	5	7	5	6	6	5	6	1	2	5	4	0	7	4	6	5	6	4	2	2	4	6	1	6	1	6	6	2	6
BST1	Q10588	ADP-ribosyl cyclase/cyclic ADP-ribose hydrolase 2 OS=Homo sapiens GN=BST1 PE=1 SV=2	ADP-ribosyl cyclase/cyclic ADP-ribose hydrolase 2	3	3	3	1	3	3	3	2	0	2	3	1	0	2	1	1	1	0	2	0	2	1	2	0	0	0	0	0	0	1	0	0	0	0	0	0	0	0	1	1	0	0	2	2	1	1
BTN2A1	Q7KYR7	Butyrophilin subfamily 2 member A1 OS=Homo sapiens GN=BTN2A1 PE=1 SV=3;Butyrophilin subfamily 2 member A2 OS=Homo sapiens GN=BTN2A2 PE=2 SV=2	Butyrophilin subfamily 2 member A1;Butyrophilin subfamily 2 member A2	2;1	2;1	2;1	2	2	2	2	2	0	1	1	2	0	2	1	2	2	0	1	0	2	2	2	0	0	0	0	0	0	1	0	0	0	0	0	0	0	0	0	0	1	0	0	0	0	0
BUB3	O43684	Mitotic checkpoint protein BUB3 OS=Homo sapiens GN=BUB3 PE=1 SV=1	Mitotic checkpoint protein BUB3	5	5	5	1	5	5	5	2	0	4	4	4	1	3	4	5	4	0	1	1	2	2	2	0	0	0	0	0	0	0	0	2	0	1	0	0	0	0	2	0	0	1	0	0	0	0
BZW1	Q7L1Q6	Basic leucine zipper and W2 domain-containing protein 1 OS=Homo sapiens GN=BZW1 PE=1 SV=1	Basic leucine zipper and W2 domain-containing protein 1	4	4	4	1	4	4	4	3	0	2	3	3	0	2	2	4	2	0	2	2	2	2	0	0	0	0	0	0	0	1	0	0	0	0	0	0	0	0	1	0	0	0	0	0	0	0
C12orf10	Q9HB07	UPF0160 protein MYG1, mitochondrial OS=Homo sapiens GN=C12orf10 PE=1 SV=2	UPF0160 protein MYG1, mitochondrial	2	2	2	1	2	2	2	1	0	1	1	1	0	1	1	1	1	0	2	0	1	1	1	1	0	0	0	0	0	1	0	0	1	1	0	0	0	0	2	0	1	0	2	1	0	1
C14orf166	Q9Y224	UPF0568 protein C14orf166 OS=Homo sapiens GN=C14orf166 PE=1 SV=1	UPF0568 protein C14orf166	4	4	4	1	4	4	4	4	0	4	4	4	1	4	3	4	4	2	4	3	3	3	3	0	0	0	0	0	0	2	0	0	1	0	0	0	0	1	2	0	0	0	1	1	0	1
C1QBP	Q07021	Complement component 1 Q subcomponent-binding protein, mitochondrial OS=Homo sapiens GN=C1QBP PE=1 SV=1	Complement component 1 Q subcomponent-binding protein, mitochondrial	4	4	4	1	4	4	4	3	0	3	2	3	1	3	3	3	3	1	3	2	0	1	2	1	0	0	0	0	0	4	0	0	1	0	0	0	0	1	1	0	2	0	2	2	0	0
C1QTNF3	Q9BXJ4	Complement C1q tumor necrosis factor-related protein 3 OS=Homo sapiens GN=C1QTNF3 PE=1 SV=1	Complement C1q tumor necrosis factor-related protein 3	4	4	4	1	4	4	4	1	1	0	0	0	0	1	0	0	0	0	0	0	1	2	2	3	0	0	3	3	0	2	2	0	0	0	0	0	0	0	0	0	3	0	2	2	0	2
C1R	P00736	Complement C1r subcomponent OS=Homo sapiens GN=C1R PE=1 SV=2;Complement C1r subcomponent-like protein OS=Homo sapiens GN=C1RL PE=1 SV=2	Complement C1r subcomponent;Complement C1r subcomponent heavy chain;Complement C1r subcomponent light chain;Complement C1r subcomponent-like protein	2;1	2;1	2;1	2	2	2	2	0	0	0	0	0	0	0	0	0	0	0	2	0	0	0	1	0	0	0	0	0	0	2	0	0	0	0	0	0	0	0	0	0	1	0	0	0	0	1
C1S	P09871	Complement C1s subcomponent OS=Homo sapiens GN=C1S PE=1 SV=1	Complement C1s subcomponent;Complement C1s subcomponent heavy chain;Complement C1s subcomponent light chain	4	4	4	1	4	4	4	2	0	0	0	0	0	0	0	0	0	0	4	0	1	2	4	0	0	0	2	0	0	3	1	0	0	0	0	0	0	0	0	0	1	0	1	4	0	2
C3	P01024	Complement C3 OS=Homo sapiens GN=C3 PE=1 SV=2	Complement C3;Complement C3 beta chain;C3-beta-c;Complement C3 alpha chain;C3a anaphylatoxin;Acylation stimulating protein;Complement C3b alpha chain;Complement C3c alpha chain fragment 1;Complement C3dg fragment;Complement C3g fragment;Complement C3d fragment;Complement C3f fragment;Complement C3c alpha chain fragment 2	10	2	2	1	10	2	2	9	2	5	5	6	3	8	8	8	10	3	9	6	7	7	6	6	1	1	8	7	0	9	5	5	0	3	0	0	0	0	5	0	8	0	5	6	0	6
C8A	P07357	Complement component C8 alpha chain OS=Homo sapiens GN=C8A PE=1 SV=2	Complement component C8 alpha chain	2	2	2	1	2	2	2	0	0	0	0	0	0	0	0	2	0	0	1	0	0	0	0	0	0	0	2	1	0	1	0	0	0	0	1	0	0	0	0	1	0	0	0	0	0	0
C8B	P07358	Complement component C8 beta chain OS=Homo sapiens GN=C8B PE=1 SV=3	Complement component C8 beta chain	2	2	2	1	2	2	2	0	1	0	0	0	0	0	0	1	0	0	0	0	0	0	0	0	0	1	2	2	0	0	1	0	0	0	0	0	0	0	0	0	0	0	0	0	0	1
CACNA2D1	P54289	Voltage-dependent calcium channel subunit alpha-2/delta-1 OS=Homo sapiens GN=CACNA2D1 PE=1 SV=3	Voltage-dependent calcium channel subunit alpha-2/delta-1;Voltage-dependent calcium channel subunit alpha-2-1;Voltage-dependent calcium channel subunit delta-1	24	24	24	1	24	24	24	19	0	18	15	18	5	13	10	9	11	0	17	7	18	19	12	8	0	0	4	1	0	14	1	9	4	5	0	0	0	1	4	0	8	0	12	13	0	8
CACYBP	Q9HB71	Calcyclin-binding protein OS=Homo sapiens GN=CACYBP PE=1 SV=2	Calcyclin-binding protein	5	5	5	1	5	5	5	3	0	4	5	5	3	5	5	4	5	0	1	3	3	2	2	1	0	0	0	0	1	0	0	3	1	2	0	0	0	0	1	0	0	0	0	0	0	0
CAD	P27708	CAD protein OS=Homo sapiens GN=CAD PE=1 SV=3	CAD protein;Glutamine-dependent carbamoyl-phosphate synthase;Aspartate carbamoyltransferase;Dihydroorotase	22;1	22;1	22;1	2	22	22	22	11	0	12	13	10	1	9	7	22	17	0	9	3	10	11	2	0	0	0	4	2	0	4	1	4	0	4	0	0	0	2	6	0	1	0	2	2	0	1
CADM1	Q9BY67	Cell adhesion molecule 1 OS=Homo sapiens GN=CADM1 PE=1 SV=2	Cell adhesion molecule 1	2	2	2	1	2	2	2	2	0	2	1	1	1	0	0	0	0	0	2	0	1	1	1	0	0	0	0	0	0	2	0	1	0	1	0	0	0	0	1	0	2	0	1	1	0	0
CALD1	Q05682	Caldesmon OS=Homo sapiens GN=CALD1 PE=1 SV=3	Caldesmon	4	4	4	1	4	4	4	2	0	2	2	1	2	1	1	1	0	0	2	0	2	2	1	1	0	0	0	0	0	2	0	1	0	1	0	0	0	0	0	0	1	0	2	2	0	0
CALM1	P62158	Calmodulin OS=Homo sapiens GN=CALM1 PE=1 SV=2	Calmodulin	14	14	12	1	14	14	12	10	1	13	12	12	7	12	9	11	11	6	13	8	8	8	8	9	2	2	8	1	2	10	4	9	7	7	5	2	1	3	4	1	9	1	9	8	3	7
CALML3	P27482	Calmodulin-like protein 3 OS=Homo sapiens GN=CALML3 PE=1 SV=2	Calmodulin-like protein 3	6;1	4;0	4;0	2	6	4	4	5	3	4	4	5	2	5	3	3	3	3	5	4	4	4	4	4	2	2	3	1	1	4	2	2	1	1	1	0	1	2	3	2	4	1	4	4	1	3
CALML5	Q9NZT1	Calmodulin-like protein 5 OS=Homo sapiens GN=CALML5 PE=1 SV=2	Calmodulin-like protein 5	10	10	10	1	10	10	10	8	5	7	7	8	2	7	5	6	7	4	7	6	5	5	7	6	2	3	6	2	1	8	7	3	1	1	2	1	2	1	6	3	8	1	9	7	4	7
CALR	P27797	Calreticulin OS=Homo sapiens GN=CALR PE=1 SV=1	Calreticulin	15	15	15	1	15	15	15	14	3	15	11	14	8	15	14	15	15	6	14	8	8	6	7	5	1	1	5	2	0	11	2	8	5	8	2	2	3	5	4	2	10	2	9	9	0	5
CALU	O43852	Calumenin OS=Homo sapiens GN=CALU PE=1 SV=2	Calumenin	12	12	12	1	12	12	12	10	2	10	9	11	7	9	10	10	10	3	9	6	5	5	5	4	1	0	2	0	0	8	0	5	1	5	1	1	1	3	2	1	7	0	4	5	0	2
CAMK2D	Q13557	Calcium/calmodulin-dependent protein kinase type II subunit delta OS=Homo sapiens GN=CAMK2D PE=1 SV=3	Calcium/calmodulin-dependent protein kinase type II subunit delta	4;1;1	4;1;1	3;0;0	3	4	4	3	3	0	4	4	4	1	4	4	4	4	0	4	3	3	3	3	2	0	0	1	0	0	4	0	0	0	0	0	0	0	0	2	0	4	0	2	2	0	1
CAMK2G	Q13555	Calcium/calmodulin-dependent protein kinase type II subunit gamma OS=Homo sapiens GN=CAMK2G PE=1 SV=3	Calcium/calmodulin-dependent protein kinase type II subunit gamma	3	2	2	1	3	2	2	3	0	3	3	3	0	2	2	2	3	0	3	1	2	3	1	1	0	0	1	0	0	2	0	0	0	0	0	0	0	0	0	0	2	0	1	0	0	0
CAND1	Q86VP6	Cullin-associated NEDD8-dissociated protein 1 OS=Homo sapiens GN=CAND1 PE=1 SV=2	Cullin-associated NEDD8-dissociated protein 1	13	13	13	1	13	13	13	9	0	13	10	12	3	10	7	11	9	0	10	1	9	8	7	0	1	1	0	0	0	5	0	4	1	0	0	0	0	0	3	0	2	0	3	2	1	3
CANT1	Q8WVQ1	Soluble calcium-activated nucleotidase 1 OS=Homo sapiens GN=CANT1 PE=1 SV=1	Soluble calcium-activated nucleotidase 1	2	2	2	1	2	2	2	2	0	1	1	2	1	2	2	2	2	0	0	0	1	1	0	1	0	0	0	0	0	0	0	0	0	0	0	0	0	0	0	0	0	0	0	0	0	0
CANX	P27824	Calnexin OS=Homo sapiens GN=CANX PE=1 SV=2	Calnexin	16	16	16	1	16	16	16	15	2	14	15	15	12	15	14	15	15	7	14	10	10	11	9	7	2	2	5	4	0	12	4	7	3	7	2	3	2	3	8	1	10	1	8	9	2	6
CAP1	Q01518	Adenylyl cyclase-associated protein 1 OS=Homo sapiens GN=CAP1 PE=1 SV=5	Adenylyl cyclase-associated protein 1	22	22	21	1	22	22	21	18	1	19	18	18	15	18	15	19	18	7	17	13	12	14	14	8	2	1	7	5	0	16	3	15	7	12	4	3	3	2	5	1	15	0	11	11	0	5
CAP2	P40123	Adenylyl cyclase-associated protein 2 OS=Homo sapiens GN=CAP2 PE=1 SV=1	Adenylyl cyclase-associated protein 2	4	3	3	1	4	3	3	2	0	2	2	2	0	2	1	3	2	0	2	2	1	1	1	1	0	0	1	1	0	2	0	0	1	1	0	0	0	0	1	0	0	0	2	2	0	1
CAPG	P40121	Macrophage-capping protein OS=Homo sapiens GN=CAPG PE=1 SV=2	Macrophage-capping protein	8	8	8	1	8	8	8	3	0	7	5	7	2	6	5	3	4	2	4	3	3	3	4	1	0	0	0	0	0	2	1	3	1	2	0	0	0	1	1	1	2	0	5	6	0	5
CAPN1	P07384	Calpain-1 catalytic subunit OS=Homo sapiens GN=CAPN1 PE=1 SV=1	Calpain-1 catalytic subunit	11	11	11	1	11	11	11	9	6	9	8	8	5	9	9	9	10	7	9	9	11	10	9	9	0	0	3	3	0	10	6	5	4	3	1	0	0	0	5	0	11	0	5	3	1	4
CAPN2	P17655	Calpain-2 catalytic subunit OS=Homo sapiens GN=CAPN2 PE=1 SV=6	Calpain-2 catalytic subunit	7	7	7	1	7	7	7	6	0	6	6	6	2	2	2	6	2	1	5	1	6	7	4	2	1	1	3	1	0	5	0	4	1	3	0	1	0	1	3	0	3	0	5	4	0	3
CAPN5	O15484	Calpain-5 OS=Homo sapiens GN=CAPN5 PE=1 SV=2	Calpain-5	5	5	5	1	5	5	5	4	0	4	2	2	0	1	0	1	0	0	4	0	4	4	1	0	0	0	0	0	0	0	0	0	0	0	0	0	0	0	0	0	1	0	0	0	0	0
CAPNS1	P04632	Calpain small subunit 1 OS=Homo sapiens GN=CAPNS1 PE=1 SV=1	Calpain small subunit 1	7;2	7;2	7;2	2	7	7	7	4	0	6	5	6	2	6	6	5	6	0	7	3	7	7	5	3	0	0	2	1	0	7	0	2	0	2	1	0	0	1	4	0	7	0	5	4	0	4
CAPZA1	P52907	F-actin-capping protein subunit alpha-1 OS=Homo sapiens GN=CAPZA1 PE=1 SV=3	F-actin-capping protein subunit alpha-1	12	12	10	1	12	12	10	9	1	11	7	11	4	9	6	10	10	3	10	5	6	5	5	5	1	3	0	1	0	9	2	4	2	1	2	1	2	1	2	2	9	0	4	6	0	6
CAPZA2	P47755	F-actin-capping protein subunit alpha-2 OS=Homo sapiens GN=CAPZA2 PE=1 SV=3	F-actin-capping protein subunit alpha-2	10	8	8	1	10	8	8	8	0	8	9	8	4	8	6	8	8	3	8	6	6	7	4	4	1	2	0	0	0	7	0	3	3	2	3	1	2	3	4	0	7	0	8	8	0	7
CAPZB	P47756	F-actin-capping protein subunit beta OS=Homo sapiens GN=CAPZB PE=1 SV=4	F-actin-capping protein subunit beta	10	10	10	1	10	10	10	9	2	9	9	9	4	8	7	8	7	2	8	6	5	6	6	5	1	0	5	1	0	8	2	6	2	4	1	0	0	2	5	0	8	1	6	8	1	6
CARHSP1	Q9Y2V2	Calcium-regulated heat stable protein 1 OS=Homo sapiens GN=CARHSP1 PE=1 SV=2	Calcium-regulated heat stable protein 1	2	2	2	1	2	2	2	1	0	1	1	1	0	1	1	1	1	0	1	1	1	1	1	0	0	0	0	0	0	1	0	0	1	0	0	0	0	1	1	0	0	0	1	1	0	1
CARS	P49589	Cysteine--tRNA ligase, cytoplasmic OS=Homo sapiens GN=CARS PE=1 SV=3	Cysteine--tRNA ligase, cytoplasmic	6	6	6	1	6	6	6	4	0	4	3	3	1	4	4	5	4	0	3	0	5	3	3	0	0	0	0	0	0	0	0	1	0	2	1	1	0	1	1	0	0	0	1	1	0	0
CASC4	Q6P4E1	Protein CASC4 OS=Homo sapiens GN=CASC4 PE=1 SV=1	Protein CASC4	2	2	2	1	2	2	2	1	0	2	0	1	0	2	0	1	2	0	1	0	0	0	0	0	0	0	0	0	0	0	0	0	0	0	0	0	0	0	0	0	0	0	0	0	0	0
CASK	O14936	Peripheral plasma membrane protein CASK OS=Homo sapiens GN=CASK PE=1 SV=3	Peripheral plasma membrane protein CASK	2	2	2	1	2	2	2	2	0	0	0	0	0	0	0	0	0	0	2	0	0	2	0	0	0	0	0	0	1	1	0	0	0	0	0	0	0	0	0	0	1	0	0	0	0	0
CASP14	P31944	Caspase-14 OS=Homo sapiens GN=CASP14 PE=1 SV=2	Caspase-14;Caspase-14 subunit p17, mature form;Caspase-14 subunit p10, mature form;Caspase-14 subunit p20, intermediate form;Caspase-14 subunit p8, intermediate form	13	13	13	1	13	13	13	11	8	12	12	12	8	12	11	9	12	11	12	11	8	8	8	12	7	8	10	9	6	11	10	10	4	7	8	4	4	4	7	10	12	3	11	13	5	11
CAST	P20810	Calpastatin OS=Homo sapiens GN=CAST PE=1 SV=4	Calpastatin	2	2	2	1	2	2	2	2	0	2	2	2	0	2	0	0	0	0	2	0	1	2	0	0	0	0	0	0	0	0	0	0	0	0	0	0	0	0	0	0	0	0	0	0	0	0
CAT	P04040	Catalase OS=Homo sapiens GN=CAT PE=1 SV=3	Catalase	14	14	14	1	14	14	14	7	7	8	8	8	5	8	11	9	9	8	8	10	12	11	11	10	3	4	5	4	7	10	7	6	2	6	4	3	1	1	6	3	9	2	7	7	1	7
CAV1	Q03135	Caveolin-1 OS=Homo sapiens GN=CAV1 PE=1 SV=4	Caveolin-1	6;1	6;1	6;1	2	6	6	6	4	2	5	4	5	5	5	4	4	4	1	5	2	3	4	5	2	0	0	1	2	0	5	2	3	2	4	1	0	0	1	4	0	4	0	3	4	0	2
CBR1	P16152	Carbonyl reductase [NADPH] 1 OS=Homo sapiens GN=CBR1 PE=1 SV=3	Carbonyl reductase [NADPH] 1	11	11	9	1	11	11	9	9	0	9	9	9	4	7	5	7	6	1	8	5	5	6	5	0	0	0	0	0	0	6	4	4	3	2	1	0	0	1	5	0	3	0	4	5	1	3
CBX3	Q13185	Chromobox protein homolog 3 OS=Homo sapiens GN=CBX3 PE=1 SV=4	Chromobox protein homolog 3	4;1	4;1	3;1	2	4	4	3	1	0	3	1	3	0	2	2	4	4	0	0	1	1	1	0	0	0	0	0	0	0	0	0	2	0	1	1	1	0	0	1	0	0	0	0	1	0	1
CCAR2	Q8N163	Cell cycle and apoptosis regulator protein 2 OS=Homo sapiens GN=CCAR2 PE=1 SV=2	Cell cycle and apoptosis regulator protein 2	2	2	2	1	2	2	2	0	0	1	1	2	0	1	1	2	2	0	0	0	0	0	0	0	0	0	0	0	0	0	0	0	0	0	0	0	0	0	0	0	0	0	0	0	0	0
CCBE1	Q6UXH8	Collagen and calcium-binding EGF domain-containing protein 1 OS=Homo sapiens GN=CCBE1 PE=1 SV=1	Collagen and calcium-binding EGF domain-containing protein 1	2	2	2	1	2	2	2	0	0	0	0	0	0	0	0	0	0	0	0	0	0	2	2	2	0	0	2	0	0	2	0	0	1	0	0	1	0	1	0	0	2	0	0	1	0	1
CCDC47	Q96A33	Coiled-coil domain-containing protein 47 OS=Homo sapiens GN=CCDC47 PE=1 SV=1	Coiled-coil domain-containing protein 47	3	3	3	1	3	3	3	2	0	2	1	1	0	3	3	3	2	0	1	0	0	0	0	0	0	0	0	0	0	2	0	0	0	0	0	0	0	0	0	0	0	0	0	0	0	0
CCDC50	Q8IVM0	Coiled-coil domain-containing protein 50 OS=Homo sapiens GN=CCDC50 PE=1 SV=1	Coiled-coil domain-containing protein 50	3	3	3	1	3	3	3	3	1	1	2	2	1	1	1	0	0	1	3	1	1	2	1	1	0	0	1	0	0	3	1	0	0	1	0	0	0	0	0	0	1	0	1	1	0	1
CCM2	Q9BSQ5	Malcavernin OS=Homo sapiens GN=CCM2 PE=1 SV=1	Cerebral cavernous malformations 2 protein	5	5	5	1	5	5	5	5	0	4	5	5	0	1	1	2	1	0	5	0	5	5	5	3	0	0	0	0	0	2	0	2	0	0	0	0	0	0	0	0	1	0	1	1	0	1
CCT2	P78371	T-complex protein 1 subunit beta OS=Homo sapiens GN=CCT2 PE=1 SV=4	T-complex protein 1 subunit beta	26	26	26	1	26	26	26	21	0	21	20	22	19	21	20	23	21	12	19	13	14	19	14	8	0	1	10	2	1	17	4	18	11	17	9	5	2	10	11	1	11	1	14	12	1	8
CCT3	P49368	T-complex protein 1 subunit gamma OS=Homo sapiens GN=CCT3 PE=1 SV=4	T-complex protein 1 subunit gamma	24	24	24	1	24	24	24	16	1	22	21	20	11	20	20	21	21	7	14	12	13	14	12	7	2	0	8	2	0	10	2	11	6	9	3	1	3	5	13	1	8	0	9	8	0	6
CCT4	P50991	T-complex protein 1 subunit delta OS=Homo sapiens GN=CCT4 PE=1 SV=4	T-complex protein 1 subunit delta	23	23	23	1	23	23	23	15	0	20	17	20	8	15	16	21	19	3	19	11	17	14	9	2	1	1	6	2	0	11	1	10	7	7	6	2	2	3	11	0	9	1	10	5	0	5
CCT5	P48643	T-complex protein 1 subunit epsilon OS=Homo sapiens GN=CCT5 PE=1 SV=1	T-complex protein 1 subunit epsilon	32	32	32	1	32	32	32	22	1	25	28	25	14	29	25	29	28	6	19	19	16	17	14	3	1	1	12	3	1	14	3	19	8	14	3	2	3	3	8	3	12	1	12	12	1	7
CCT6A	P40227	T-complex protein 1 subunit zeta OS=Homo sapiens GN=CCT6A PE=1 SV=3	T-complex protein 1 subunit zeta	20	20	16	1	20	20	16	15	1	19	17	18	12	18	19	20	19	7	17	15	13	14	11	11	1	1	7	2	0	14	3	17	10	13	10	4	5	8	11	1	13	1	11	8	0	6
CCT7	Q99832	T-complex protein 1 subunit eta OS=Homo sapiens GN=CCT7 PE=1 SV=2	T-complex protein 1 subunit eta	26	26	26	1	26	26	26	20	0	24	21	23	10	23	20	22	22	7	15	12	14	14	11	3	0	0	3	1	0	12	1	15	6	12	7	1	1	1	8	1	7	1	10	6	0	5
CCT8	P50990	T-complex protein 1 subunit theta OS=Homo sapiens GN=CCT8 PE=1 SV=4	T-complex protein 1 subunit theta	29	29	29	1	29	29	29	21	0	28	25	27	17	25	23	26	24	10	21	18	22	18	16	6	1	2	9	5	2	12	4	19	13	17	9	6	6	7	22	1	11	3	15	8	1	7
CD109	Q6YHK3	CD109 antigen OS=Homo sapiens GN=CD109 PE=1 SV=2	CD109 antigen	28	28	28	1	28	28	28	23	0	26	23	23	11	22	15	15	15	3	23	9	18	21	19	9	2	0	7	2	0	19	0	12	7	7	2	1	0	3	3	0	14	0	13	11	0	10
CD151	P48509	CD151 antigen OS=Homo sapiens GN=CD151 PE=1 SV=3	CD151 antigen	4	4	4	1	4	4	4	4	1	4	4	4	2	4	2	2	2	1	4	1	4	4	4	2	1	1	2	1	1	4	1	2	1	3	1	0	0	0	1	1	3	0	4	4	0	2
CD248	Q9HCU0	Endosialin OS=Homo sapiens GN=CD248 PE=1 SV=1	Endosialin	4	4	4	1	4	4	4	4	0	1	2	2	0	0	0	2	1	0	4	0	4	4	4	2	1	0	2	3	0	2	0	0	0	0	1	0	0	0	0	0	2	1	2	2	0	1
CD276	Q5ZPR3	CD276 antigen OS=Homo sapiens GN=CD276 PE=1 SV=1	CD276 antigen	9	9	9	1	9	9	9	9	1	8	7	9	5	8	7	7	7	1	7	5	6	7	7	5	2	0	5	0	0	9	2	6	2	4	1	1	0	1	0	0	6	0	6	6	2	5
CD44	P16070	CD44 antigen OS=Homo sapiens GN=CD44 PE=1 SV=3	CD44 antigen	10	10	10	1	10	10	10	9	3	9	10	9	7	9	9	8	7	2	8	5	9	9	8	9	2	2	8	4	0	8	5	9	7	7	4	2	0	5	5	0	10	0	9	8	4	7
CD46	P15529	Membrane cofactor protein OS=Homo sapiens GN=CD46 PE=1 SV=3	Membrane cofactor protein	2	2	2	1	2	2	2	2	0	2	2	1	1	1	1	0	1	0	2	0	2	2	1	1	0	0	1	0	0	2	0	1	0	0	0	0	0	0	1	0	1	0	1	1	0	0
CD47	Q08722	Leukocyte surface antigen CD47 OS=Homo sapiens GN=CD47 PE=1 SV=1	Leukocyte surface antigen CD47	4	4	4	1	4	4	4	4	0	4	4	4	2	3	3	3	4	3	4	3	4	4	4	3	0	0	2	2	0	3	2	4	4	2	3	1	2	2	1	1	4	0	2	3	2	1
CD55	P08174	Complement decay-accelerating factor OS=Homo sapiens GN=CD55 PE=1 SV=4	Complement decay-accelerating factor	14	14	14	1	14	14	14	7	0	11	10	11	10	12	8	7	8	0	7	7	5	5	5	0	1	0	1	0	0	1	1	10	8	10	4	2	2	5	3	0	0	2	3	0	1	0
CD58	P19256	Lymphocyte function-associated antigen 3 OS=Homo sapiens GN=CD58 PE=1 SV=1	Lymphocyte function-associated antigen 3	2	2	2	1	2	2	2	1	0	2	2	2	2	1	2	1	1	0	0	1	1	1	1	0	0	0	0	0	0	0	0	2	0	1	0	0	0	0	1	0	0	0	2	1	0	0
CD59	P13987	CD59 glycoprotein OS=Homo sapiens GN=CD59 PE=1 SV=1	CD59 glycoprotein	5	5	5	1	5	5	5	4	2	3	3	4	3	3	3	4	3	1	3	3	4	4	4	3	1	0	3	1	0	4	1	4	2	4	1	1	0	1	1	1	3	1	3	3	1	3
CD63	P08962	CD63 antigen OS=Homo sapiens GN=CD63 PE=1 SV=2	CD63 antigen	2	2	2	1	2	2	2	2	1	2	2	2	2	2	2	2	2	1	2	0	2	2	2	2	1	0	2	2	1	2	1	2	1	2	1	1	0	1	1	0	2	1	2	2	1	2
CD81	P60033	CD81 antigen OS=Homo sapiens GN=CD81 PE=1 SV=1	CD81 antigen	4	4	4	1	4	4	4	4	2	4	4	4	1	3	4	3	3	1	4	2	4	4	4	2	1	1	3	2	1	4	1	2	2	1	2	1	1	1	1	0	4	1	4	4	2	4
CD82	P27701	CD82 antigen OS=Homo sapiens GN=CD82 PE=1 SV=1	CD82 antigen	5	5	5	1	5	5	5	5	0	4	5	4	3	3	3	2	2	0	4	1	4	5	4	3	0	0	2	2	0	5	0	1	2	2	1	1	0	0	0	0	4	0	1	3	0	0
CD9	P21926	CD9 antigen OS=Homo sapiens GN=CD9 PE=1 SV=4	CD9 antigen	6	6	6	1	6	6	6	6	3	6	6	6	6	6	6	6	6	3	6	4	6	6	6	4	1	0	6	3	1	6	0	6	3	4	1	1	0	0	3	0	6	0	6	6	1	6
CD97	P48960	CD97 antigen OS=Homo sapiens GN=CD97 PE=1 SV=4	CD97 antigen;CD97 antigen subunit alpha;CD97 antigen subunit beta	5	5	5	1	5	5	5	5	0	5	5	5	1	5	5	5	4	0	4	1	4	2	3	3	0	0	2	0	0	4	1	1	0	1	0	0	0	0	1	0	4	0	4	5	0	3
CD99	P14209	CD99 antigen OS=Homo sapiens GN=CD99 PE=1 SV=1	CD99 antigen	2	2	2	1	2	2	2	2	1	1	2	2	2	2	1	1	2	0	2	0	1	1	1	1	0	0	1	1	0	2	0	2	1	2	0	0	0	0	0	0	2	0	1	1	0	0
CD99L2	Q8TCZ2	CD99 antigen-like protein 2 OS=Homo sapiens GN=CD99L2 PE=1 SV=1	CD99 antigen-like protein 2	3	3	3	1	3	3	3	2	0	1	1	1	0	1	0	0	1	0	2	0	2	2	1	1	0	0	0	0	0	1	0	0	0	0	0	0	0	0	0	0	0	0	2	2	0	2
CDC42	P60953	Cell division control protein 42 homolog OS=Homo sapiens GN=CDC42 PE=1 SV=2	Cell division control protein 42 homolog	7;1;1	6;0;0	6;0;0	3	7	6	6	7	0	7	7	7	3	6	3	5	5	0	7	2	4	5	5	1	0	0	2	2	0	3	0	5	5	5	2	1	1	1	1	1	3	1	7	7	1	4
CDC42BPA	Q5VT25	Serine/threonine-protein kinase MRCK alpha OS=Homo sapiens GN=CDC42BPA PE=1 SV=1	Serine/threonine-protein kinase MRCK alpha	4	2	2	1	4	2	2	4	1	2	1	1	0	0	0	2	1	0	4	1	4	4	4	0	0	0	0	0	0	1	0	0	0	1	0	0	1	0	0	0	1	0	2	1	0	2
CDC42BPB	Q9Y5S2	Serine/threonine-protein kinase MRCK beta OS=Homo sapiens GN=CDC42BPB PE=1 SV=2	Serine/threonine-protein kinase MRCK beta	5;1	5;1	3;1	2	5	5	3	4	1	4	4	3	0	1	0	4	4	0	3	2	4	5	3	0	0	0	1	0	0	3	0	0	0	1	0	0	0	0	1	0	2	0	1	1	0	1
CDCP1	Q9H5V8	CUB domain-containing protein 1 OS=Homo sapiens GN=CDCP1 PE=1 SV=3	CUB domain-containing protein 1	10	10	10	1	10	10	10	9	0	7	7	6	3	4	1	4	3	0	6	1	5	7	3	0	0	0	1	0	0	6	0	3	0	2	0	0	0	0	1	0	5	0	6	5	0	3
CDH11	P55287	Cadherin-11 OS=Homo sapiens GN=CDH11 PE=1 SV=2	Cadherin-11	7	7	7	1	7	7	7	7	1	1	2	3	2	1	1	0	0	0	6	0	6	5	3	2	0	0	0	0	0	4	0	1	0	2	0	0	0	0	0	0	2	0	2	2	0	1
CDH13	P55290	Cadherin-13 OS=Homo sapiens GN=CDH13 PE=1 SV=1	Cadherin-13	7	7	7	1	7	7	7	7	0	4	3	4	2	4	4	3	5	0	6	3	5	6	4	4	0	0	3	1	0	5	0	1	2	1	0	0	0	1	2	0	5	0	5	5	0	2
CDH2	P19022	Cadherin-2 OS=Homo sapiens GN=CDH2 PE=1 SV=4	Cadherin-2	9	9	9	1	9	9	9	8	0	7	7	7	0	7	4	4	7	0	7	2	9	9	7	2	0	0	0	0	0	7	1	1	0	0	0	0	0	0	0	1	4	0	6	4	0	2
CDIPT	O14735	CDP-diacylglycerol--inositol 3-phosphatidyltransferase OS=Homo sapiens GN=CDIPT PE=1 SV=1	CDP-diacylglycerol--inositol 3-phosphatidyltransferase	2	2	2	1	2	2	2	2	0	1	2	1	1	2	2	2	2	0	2	1	2	1	1	1	0	0	0	0	0	1	0	1	0	1	0	0	0	0	1	0	1	0	1	1	0	0
CDK1	P06493	Cyclin-dependent kinase 1 OS=Homo sapiens GN=CDK1 PE=1 SV=3	Cyclin-dependent kinase 1	5;1;1;1;1;1;1;1;1;1;1;1	5;1;1;1;1;1;1;1;1;1;1;1	4;0;0;0;0;0;0;0;0;0;0;0	12	5	5	4	3	0	3	2	3	2	4	4	4	4	0	2	2	1	1	1	0	0	0	0	0	1	2	1	1	0	2	1	0	0	1	2	0	1	0	1	0	0	1
CDK4	P11802	Cyclin-dependent kinase 4 OS=Homo sapiens GN=CDK4 PE=1 SV=2	Cyclin-dependent kinase 4	3	2	2	1	3	2	2	3	0	3	3	3	1	3	2	3	2	0	2	0	3	3	1	0	0	0	0	0	0	1	1	1	0	1	0	0	0	0	3	0	1	0	1	0	0	0
CDK5RAP3	Q96JB5	CDK5 regulatory subunit-associated protein 3 OS=Homo sapiens GN=CDK5RAP3 PE=1 SV=2	CDK5 regulatory subunit-associated protein 3	2	2	2	1	2	2	2	1	0	1	1	1	0	1	1	2	1	1	1	1	0	0	0	0	0	0	0	0	0	1	0	0	0	0	0	0	0	0	1	0	0	0	1	0	0	0
CDKN2A	P42771	Cyclin-dependent kinase inhibitor 2A, isoforms 1/2/3 OS=Homo sapiens GN=CDKN2A PE=1 SV=2	Cyclin-dependent kinase inhibitor 2A	2	2	2	1	2	2	2	2	0	2	2	2	0	2	2	2	2	0	2	2	2	2	1	0	0	0	0	0	0	0	0	0	0	0	0	0	0	0	1	0	0	0	1	1	0	0
CDSN	Q15517	Corneodesmosin OS=Homo sapiens GN=CDSN PE=1 SV=3	Corneodesmosin	6	6	6	1	6	6	6	3	3	2	3	3	3	4	4	3	4	4	3	4	3	2	3	3	3	3	3	1	2	4	4	2	1	3	1	2	0	1	3	2	4	1	4	4	1	6
CERS2	Q96G23	Ceramide synthase 2 OS=Homo sapiens GN=CERS2 PE=1 SV=1	Ceramide synthase 2	2	2	2	1	2	2	2	1	0	2	2	2	0	2	2	2	2	0	1	2	2	2	2	1	0	0	0	0	0	1	0	1	0	0	0	0	0	0	1	0	0	0	0	0	0	0
CFL1	P23528	Cofilin-1 OS=Homo sapiens GN=CFL1 PE=1 SV=3	Cofilin-1	14	14	10	1	14	14	10	10	2	11	11	11	6	9	9	8	9	3	10	6	8	9	6	5	2	2	4	1	0	9	4	8	7	9	2	5	3	4	5	2	8	1	8	9	3	6
CFL2	Q9Y281	Cofilin-2 OS=Homo sapiens GN=CFL2 PE=1 SV=1	Cofilin-2	8	4	4	1	8	4	4	6	1	7	6	7	3	6	5	4	5	1	6	3	5	6	4	3	1	0	2	1	0	5	1	3	3	4	2	2	2	2	3	0	5	0	4	5	1	3
CHD3	Q12873	Chromodomain-helicase-DNA-binding protein 3 OS=Homo sapiens GN=CHD3 PE=1 SV=3;Chromodomain-helicase-DNA-binding protein 4 OS=Homo sapiens GN=CHD4 PE=1 SV=2;Chromodomain-helicase-DNA-binding protein 5 OS=Homo sapiens GN=CHD5 PE=1 SV=1	Chromodomain-helicase-DNA-binding protein 3;Chromodomain-helicase-DNA-binding protein 4;Chromodomain-helicase-DNA-binding protein 5	2;1;1	2;1;1	2;1;1	3	2	2	2	0	0	1	1	1	1	1	0	2	2	1	1	0	0	0	1	0	0	1	1	0	1	1	1	0	0	0	1	1	1	0	0	1	2	0	0	0	1	1
CHMP1B	Q7LBR1	Charged multivesicular body protein 1b OS=Homo sapiens GN=CHMP1B PE=1 SV=1	Charged multivesicular body protein 1b	2	2	2	1	2	2	2	1	0	1	1	2	1	1	1	1	1	0	1	1	2	2	2	1	0	0	1	1	0	1	0	1	0	1	0	0	0	0	1	0	1	0	1	1	0	0
CHMP2A	O43633	Charged multivesicular body protein 2a OS=Homo sapiens GN=CHMP2A PE=1 SV=1	Charged multivesicular body protein 2a	4	4	4	1	4	4	4	4	0	1	3	4	3	1	3	3	3	0	4	0	3	3	2	0	0	0	1	0	0	2	1	1	0	3	1	0	0	1	0	0	0	0	1	1	0	0
CHMP4A	Q9BY43	Charged multivesicular body protein 4a OS=Homo sapiens GN=CHMP4A PE=1 SV=3	Charged multivesicular body protein 4a	2	2	2	1	2	2	2	2	0	2	2	2	0	2	2	2	1	0	2	0	2	2	2	0	0	0	0	0	0	0	0	1	0	1	0	0	0	0	0	0	0	0	1	1	0	0
CHMP4B	Q9H444	Charged multivesicular body protein 4b OS=Homo sapiens GN=CHMP4B PE=1 SV=1	Charged multivesicular body protein 4b	6;1	6;1	6;1	2	6	6	6	6	0	5	5	6	4	5	5	5	6	0	6	3	6	6	5	3	0	0	3	1	1	4	0	5	2	4	0	1	0	0	2	0	4	0	3	2	0	2
CHMP5	Q9NZZ3	Charged multivesicular body protein 5 OS=Homo sapiens GN=CHMP5 PE=1 SV=1	Charged multivesicular body protein 5	3	3	3	1	3	3	3	2	0	2	2	2	0	2	2	1	2	2	1	0	2	2	1	1	0	0	1	0	0	2	0	0	0	0	0	0	0	0	0	0	1	0	0	0	0	0
CHMP6	Q96FZ7	Charged multivesicular body protein 6 OS=Homo sapiens GN=CHMP6 PE=1 SV=3	Charged multivesicular body protein 6	5	5	5	1	5	5	5	1	0	3	2	3	2	3	3	2	2	0	3	0	3	3	2	1	0	0	0	0	0	1	0	3	2	1	1	1	0	1	1	0	1	0	3	3	0	1
CHN1	P15882	N-chimaerin OS=Homo sapiens GN=CHN1 PE=1 SV=3	N-chimaerin	2	2	2	1	2	2	2	0	0	2	1	1	0	2	0	1	1	0	1	0	0	1	0	0	0	0	0	0	0	0	0	0	0	0	0	0	0	0	0	0	0	0	1	1	0	1
CHORDC1	Q9UHD1	Cysteine and histidine-rich domain-containing protein 1 OS=Homo sapiens GN=CHORDC1 PE=1 SV=2	Cysteine and histidine-rich domain-containing protein 1	2	2	2	1	2	2	2	2	0	2	1	2	0	1	0	1	1	0	0	0	1	1	1	0	0	0	0	0	0	0	0	0	0	0	0	0	0	0	0	0	0	0	1	1	0	1
CHP1	Q99653	Calcineurin B homologous protein 1 OS=Homo sapiens GN=CHP1 PE=1 SV=3	Calcineurin B homologous protein 1	7	7	7	1	7	7	7	5	0	7	7	7	0	6	4	7	7	1	5	5	4	5	4	2	1	0	0	0	0	6	1	0	0	1	1	0	2	0	2	1	5	0	4	1	0	2
CIAO1	O76071	Probable cytosolic iron-sulfur protein assembly protein CIAO1 OS=Homo sapiens GN=CIAO1 PE=1 SV=1	Probable cytosolic iron-sulfur protein assembly protein CIAO1	2	2	2	1	2	2	2	1	0	1	2	1	0	2	1	2	2	0	1	0	0	0	0	0	0	0	0	0	0	0	0	0	0	0	0	0	0	0	1	0	0	0	0	0	0	0
CKAP4	Q07065	Cytoskeleton-associated protein 4 OS=Homo sapiens GN=CKAP4 PE=1 SV=2	Cytoskeleton-associated protein 4	29	29	29	1	29	29	29	24	4	24	21	26	18	25	23	29	27	13	23	23	15	14	15	14	1	2	5	2	1	23	9	13	4	12	5	1	2	9	13	0	19	0	15	14	0	14
CKAP5	Q14008	Cytoskeleton-associated protein 5 OS=Homo sapiens GN=CKAP5 PE=1 SV=3	Cytoskeleton-associated protein 5	3	3	3	1	3	3	3	1	0	2	1	1	1	1	1	2	1	0	1	0	1	1	1	0	0	0	0	0	0	0	0	0	0	0	0	1	0	0	1	0	0	0	0	0	0	0
CKB	P12277	Creatine kinase B-type OS=Homo sapiens GN=CKB PE=1 SV=1	Creatine kinase B-type	10	10	9	1	10	10	9	10	0	10	10	10	5	10	7	8	8	1	9	6	8	8	6	1	0	0	1	0	0	3	1	4	4	6	3	2	1	2	5	1	2	1	5	5	0	3
CLDN1	O95832	Claudin-1 OS=Homo sapiens GN=CLDN1 PE=1 SV=1	Claudin-1	2	2	2	1	2	2	2	2	0	2	2	2	0	1	1	0	0	0	2	0	1	2	2	1	0	0	1	0	0	2	0	0	0	0	0	0	0	0	0	0	2	0	0	1	0	1
CLDN11	O75508	Claudin-11 OS=Homo sapiens GN=CLDN11 PE=1 SV=2	Claudin-11	2	2	2	1	2	2	2	2	1	1	1	2	1	2	1	1	1	1	2	1	2	2	2	1	1	0	1	1	0	2	1	1	1	1	0	0	0	0	0	0	1	0	2	2	0	2
CLIC1	O00299	Chloride intracellular channel protein 1 OS=Homo sapiens GN=CLIC1 PE=1 SV=4	Chloride intracellular channel protein 1	12	12	12	1	12	12	12	11	0	10	11	11	7	9	7	11	11	3	10	6	10	9	7	6	3	0	5	2	0	7	1	8	7	8	6	3	3	6	5	1	8	3	7	8	0	8
CLIC4	Q9Y696	Chloride intracellular channel protein 4 OS=Homo sapiens GN=CLIC4 PE=1 SV=4	Chloride intracellular channel protein 4	13	13	13	1	13	13	13	9	3	12	10	9	4	11	5	10	6	0	12	4	6	9	4	6	0	1	5	2	0	10	0	5	5	4	3	1	1	0	2	1	8	0	7	7	0	8
CLMP	Q9H6B4	CXADR-like membrane protein OS=Homo sapiens GN=CLMP PE=1 SV=1	CXADR-like membrane protein	4	4	4	1	4	4	4	4	0	1	1	2	0	1	0	0	1	0	4	0	4	4	3	0	0	0	1	0	0	3	0	0	0	0	0	0	0	1	0	0	2	0	3	3	0	2
CLPTM1	O96005	Cleft lip and palate transmembrane protein 1 OS=Homo sapiens GN=CLPTM1 PE=1 SV=1	Cleft lip and palate transmembrane protein 1	2	2	2	1	2	2	2	2	0	2	1	1	0	2	1	2	2	0	2	0	0	1	1	0	0	0	0	0	0	0	0	0	1	0	0	0	0	0	1	0	0	0	1	1	0	0
CLTA	P09496	Clathrin light chain A OS=Homo sapiens GN=CLTA PE=1 SV=1	Clathrin light chain A	6	6	6	1	6	6	6	5	1	5	5	5	5	5	5	4	6	3	5	5	3	3	3	4	1	1	2	1	1	4	1	4	1	4	1	1	1	2	4	1	4	1	1	2	1	1
CLTB	P09497	Clathrin light chain B OS=Homo sapiens GN=CLTB PE=1 SV=1	Clathrin light chain B	2	2	2	1	2	2	2	1	0	1	1	2	1	2	2	2	2	0	1	0	1	1	0	0	0	0	0	0	0	0	0	2	0	2	0	0	0	1	2	1	1	0	1	1	0	1
CLTC	Q00610	Clathrin heavy chain 1 OS=Homo sapiens GN=CLTC PE=1 SV=5	Clathrin heavy chain 1	67;15	67;15	67;15	2	67	67	67	49	1	56	53	54	23	54	54	65	60	23	47	43	38	40	34	20	3	6	19	9	1	37	5	22	13	21	11	6	6	14	28	3	38	3	29	23	0	19
CLU	P10909	Clusterin OS=Homo sapiens GN=CLU PE=1 SV=1	Clusterin;Clusterin beta chain;Clusterin alpha chain	16	16	16	1	16	16	16	10	6	5	5	6	5	6	6	9	10	4	13	5	7	7	9	10	6	5	12	7	4	12	9	4	1	2	3	0	5	3	6	2	12	2	5	7	2	10
CLUH	O75153	Clustered mitochondria protein homolog OS=Homo sapiens GN=CLUH PE=1 SV=2	Clustered mitochondria protein homolog	5	5	5	1	5	5	5	0	0	1	0	2	0	0	1	5	4	0	0	0	0	0	0	0	0	0	0	0	0	0	0	0	0	0	0	0	0	0	1	0	0	0	0	0	0	0
CMPK1	P30085	UMP-CMP kinase OS=Homo sapiens GN=CMPK1 PE=1 SV=3	UMP-CMP kinase	4	4	4	1	4	4	4	3	0	4	4	3	2	3	1	3	4	0	3	0	3	3	2	0	0	0	0	0	0	2	0	1	0	1	0	0	0	0	0	0	1	0	1	1	0	1
CNDP2	Q96KP4	Cytosolic non-specific dipeptidase OS=Homo sapiens GN=CNDP2 PE=1 SV=2	Cytosolic non-specific dipeptidase	9	9	9	1	9	9	9	7	0	9	7	8	2	7	6	6	8	2	7	4	5	6	5	3	0	0	2	0	0	5	3	5	1	2	0	0	0	0	3	0	4	0	4	1	0	2
CNN2	Q99439	Calponin-2 OS=Homo sapiens GN=CNN2 PE=1 SV=4	Calponin-2	3;1	3;1	3;1	2	3	3	3	1	0	1	1	1	0	1	1	2	1	0	0	0	0	0	0	0	0	0	0	0	0	0	0	1	0	0	0	0	0	0	0	0	0	0	1	1	0	1
CNOT1	A5YKK6	CCR4-NOT transcription complex subunit 1 OS=Homo sapiens GN=CNOT1 PE=1 SV=2	CCR4-NOT transcription complex subunit 1	2	2	2	1	2	2	2	1	0	1	1	1	0	1	1	2	2	0	0	0	1	1	0	0	0	0	0	0	0	0	0	0	0	0	0	0	0	0	1	0	0	0	1	0	0	0
CNP	P09543	2,3-cyclic-nucleotide 3-phosphodiesterase OS=Homo sapiens GN=CNP PE=1 SV=2	2,3-cyclic-nucleotide 3-phosphodiesterase	18	18	18	1	18	18	18	12	1	13	15	12	4	10	9	14	11	1	13	4	11	14	9	4	0	0	2	0	0	12	0	9	3	3	0	1	0	0	2	0	7	0	13	8	0	3
CNPY2	Q9Y2B0	Protein canopy homolog 2 OS=Homo sapiens GN=CNPY2 PE=1 SV=1	Protein canopy homolog 2	3	3	3	1	3	3	3	0	0	3	2	2	0	3	3	2	3	1	0	1	2	2	2	0	0	0	0	0	0	1	1	0	0	1	0	0	0	0	1	0	1	0	2	1	0	1
CNTNAP3	Q9BZ76	Contactin-associated protein-like 3 OS=Homo sapiens GN=CNTNAP3 PE=2 SV=3;Contactin-associated protein-like 3B OS=Homo sapiens GN=CNTNAP3B PE=2 SV=2	Contactin-associated protein-like 3;Contactin-associated protein-like 3B	2;2	2;2	2;2	2	2	2	2	0	0	0	0	0	0	0	1	2	1	0	0	0	0	0	0	0	0	0	1	0	0	0	0	1	0	2	0	0	0	0	0	0	0	0	0	0	0	0
COL12A1	Q99715	Collagen alpha-1(XII) chain OS=Homo sapiens GN=COL12A1 PE=1 SV=2	Collagen alpha-1(XII) chain	60	60	60	1	60	60	60	11	0	6	1	4	2	5	4	18	12	1	18	1	8	18	30	47	3	0	18	11	1	52	2	2	2	5	3	2	1	1	3	0	50	0	6	7	0	48
COL15A1	P39059	Collagen alpha-1(XV) chain OS=Homo sapiens GN=COL15A1 PE=1 SV=2	Collagen alpha-1(XV) chain;Restin;Restin-2;Restin-3;Restin-4	7	7	7	1	7	7	7	0	0	0	0	0	0	0	0	4	4	0	0	0	1	0	1	1	1	1	4	2	0	2	0	1	0	0	0	0	0	0	2	0	1	0	0	0	0	0
COL18A1	P39060	Collagen alpha-1(XVIII) chain OS=Homo sapiens GN=COL18A1 PE=1 SV=5	Collagen alpha-1(XVIII) chain;Endostatin	9	9	9	1	9	9	9	1	1	0	0	1	0	3	7	9	8	2	2	2	0	1	2	2	0	0	5	3	0	5	0	0	0	0	0	0	0	0	3	0	2	0	0	1	0	2
COL1A1	P02452	Collagen alpha-1(I) chain OS=Homo sapiens GN=COL1A1 PE=1 SV=5	Collagen alpha-1(I) chain	10;1;1	10;1;1	10;1;1	3	10	10	10	5	1	2	3	3	2	3	3	4	4	0	5	2	4	4	5	5	2	1	1	1	0	5	1	2	0	2	1	0	0	1	1	0	6	0	5	8	1	7
COL1A2	P08123	Collagen alpha-2(I) chain OS=Homo sapiens GN=COL1A2 PE=1 SV=7	Collagen alpha-2(I) chain	6	6	6	1	6	6	6	6	1	1	2	2	1	2	2	3	3	1	5	0	5	5	6	5	1	1	3	3	0	4	2	0	0	3	1	0	0	1	0	0	5	0	2	5	0	5
COL6A1	P12109	Collagen alpha-1(VI) chain OS=Homo sapiens GN=COL6A1 PE=1 SV=3	Collagen alpha-1(VI) chain	50	50	50	1	50	50	50	16	15	17	10	14	4	7	5	19	11	3	14	3	11	11	8	4	2	14	42	39	11	10	23	8	3	5	1	1	2	4	6	2	14	0	8	4	1	4
COL6A2	P12110	Collagen alpha-2(VI) chain OS=Homo sapiens GN=COL6A2 PE=1 SV=4	Collagen alpha-2(VI) chain	48	48	48	1	48	48	48	17	15	13	11	16	6	7	6	20	16	2	16	5	11	13	9	6	3	10	36	32	8	9	16	12	3	7	4	0	1	2	7	0	15	0	10	10	0	11
COL6A3	P12111	Collagen alpha-3(VI) chain OS=Homo sapiens GN=COL6A3 PE=1 SV=5	Collagen alpha-3(VI) chain	203	203	203	1	203	203	203	94	84	88	71	84	33	54	62	96	81	20	86	32	70	76	63	50	23	75	180	169	53	82	101	45	14	30	13	4	8	10	39	8	68	4	58	50	7	52
COLGALT1	Q8NBJ5	Procollagen galactosyltransferase 1 OS=Homo sapiens GN=COLGALT1 PE=1 SV=1	Procollagen galactosyltransferase 1	3	3	3	1	3	3	3	0	0	1	1	3	0	2	2	3	3	0	1	2	0	0	0	0	0	0	0	0	0	0	0	0	0	0	0	0	0	0	0	0	0	0	0	0	0	0
COMT	P21964	Catechol O-methyltransferase OS=Homo sapiens GN=COMT PE=1 SV=2	Catechol O-methyltransferase	4	4	4	1	4	4	4	4	0	4	4	3	0	3	1	3	3	0	4	1	3	3	3	1	0	0	1	0	0	3	0	0	0	0	0	0	0	0	0	0	2	0	2	2	0	2
COPA	P53621	Coatomer subunit alpha OS=Homo sapiens GN=COPA PE=1 SV=2	Coatomer subunit alpha;Xenin;Proxenin	22	22	22	1	22	22	22	8	0	12	11	13	1	10	9	20	15	1	5	6	8	10	4	1	0	0	4	0	0	2	1	4	4	1	0	0	0	2	5	0	1	0	1	1	0	2
COPB1	P53618	Coatomer subunit beta OS=Homo sapiens GN=COPB1 PE=1 SV=3	Coatomer subunit beta	9	9	9	1	9	9	9	7	0	5	6	6	1	5	4	9	8	1	4	1	5	5	2	0	0	0	1	0	0	1	0	1	0	0	1	0	0	1	3	0	1	0	2	1	0	1
COPB2	P35606	Coatomer subunit beta OS=Homo sapiens GN=COPB2 PE=1 SV=2	Coatomer subunit beta	17	17	17	1	17	17	17	11	3	13	13	13	4	7	11	16	15	6	9	10	9	7	9	3	1	0	5	1	0	9	3	8	2	5	1	1	0	2	7	2	3	1	8	7	0	3
COPE	O14579	Coatomer subunit epsilon OS=Homo sapiens GN=COPE PE=1 SV=3	Coatomer subunit epsilon	2	2	2	1	2	2	2	2	0	2	2	2	0	2	1	2	2	1	2	1	1	1	1	0	0	0	0	0	0	2	0	0	0	0	0	0	0	0	1	0	2	0	0	1	0	0
COPG1	Q9Y678	Coatomer subunit gamma-1 OS=Homo sapiens GN=COPG1 PE=1 SV=1	Coatomer subunit gamma-1	9;1	9;1	9;1	2	9	9	9	3	0	8	8	7	0	5	6	9	8	0	3	2	7	6	4	0	0	0	0	0	0	2	0	3	0	2	0	0	0	0	4	0	1	0	2	2	0	1
COPS2	P61201	COP9 signalosome complex subunit 2 OS=Homo sapiens GN=COPS2 PE=1 SV=1	COP9 signalosome complex subunit 2	2	2	2	1	2	2	2	2	0	2	2	2	0	2	2	2	2	1	2	1	2	2	2	1	0	0	0	0	0	1	1	0	1	0	0	0	0	0	1	0	1	0	1	0	0	0
COPS3	Q9UNS2	COP9 signalosome complex subunit 3 OS=Homo sapiens GN=COPS3 PE=1 SV=3	COP9 signalosome complex subunit 3	3	3	3	1	3	3	3	1	0	3	2	1	2	2	1	3	2	2	1	2	2	2	2	0	0	0	1	0	0	1	0	1	1	2	2	1	0	1	1	0	0	0	0	0	0	0
COPS4	Q9BT78	COP9 signalosome complex subunit 4 OS=Homo sapiens GN=COPS4 PE=1 SV=1	COP9 signalosome complex subunit 4	10	10	10	1	10	10	10	6	0	9	8	8	3	7	7	9	9	3	5	5	6	7	5	0	0	0	2	0	0	5	0	3	2	1	0	0	0	2	3	0	3	0	2	2	0	2
COPS5	Q92905	COP9 signalosome complex subunit 5 OS=Homo sapiens GN=COPS5 PE=1 SV=4	COP9 signalosome complex subunit 5	5	5	5	1	5	5	5	4	0	5	5	4	1	4	3	5	5	1	3	1	3	4	3	0	0	0	0	0	0	2	0	0	0	0	0	0	0	0	1	0	1	0	2	2	0	2
COPS6	Q7L5N1	COP9 signalosome complex subunit 6 OS=Homo sapiens GN=COPS6 PE=1 SV=1	COP9 signalosome complex subunit 6	5	5	5	1	5	5	5	5	0	4	4	3	0	4	4	5	4	1	4	1	3	3	1	0	0	0	0	0	0	2	0	0	0	0	0	0	0	0	0	0	0	0	0	0	0	0
COPS7A	Q9UBW8	COP9 signalosome complex subunit 7a OS=Homo sapiens GN=COPS7A PE=1 SV=1	COP9 signalosome complex subunit 7a	3	3	3	1	3	3	3	2	0	2	2	2	0	2	2	1	2	1	2	1	2	2	2	0	0	0	0	0	0	1	0	1	0	1	0	0	0	0	1	0	1	0	1	0	0	0
COPS8	Q99627	COP9 signalosome complex subunit 8 OS=Homo sapiens GN=COPS8 PE=1 SV=1	COP9 signalosome complex subunit 8	4	4	4	1	4	4	4	4	0	3	3	2	0	2	2	3	4	1	3	3	3	4	2	0	0	0	0	0	0	2	0	1	0	1	0	0	0	0	1	0	1	0	1	1	0	1
COPZ1	P61923	Coatomer subunit zeta-1 OS=Homo sapiens GN=COPZ1 PE=1 SV=1	Coatomer subunit zeta-1	6	6	6	1	6	6	6	4	0	5	5	5	2	4	3	5	5	2	5	2	4	3	2	1	0	0	0	0	0	3	1	2	2	2	1	2	0	1	3	0	1	0	1	1	0	1
CORO1B	Q9BR76	Coronin-1B OS=Homo sapiens GN=CORO1B PE=1 SV=1	Coronin-1B	5	5	4	1	5	5	4	4	0	4	3	4	2	4	4	4	2	1	4	1	2	3	1	1	0	0	1	0	0	1	1	2	0	0	0	1	0	0	3	0	1	0	1	2	0	2
CORO1C	Q9ULV4	Coronin-1C OS=Homo sapiens GN=CORO1C PE=1 SV=1	Coronin-1C	15	15	15	1	15	15	15	14	0	15	15	13	8	15	11	13	12	0	13	5	12	10	8	3	0	0	3	0	0	10	0	9	4	10	1	0	0	1	5	0	5	0	9	10	0	3
COTL1	Q14019	Coactosin-like protein OS=Homo sapiens GN=COTL1 PE=1 SV=3	Coactosin-like protein	7	7	7	1	7	7	7	6	0	6	5	5	4	6	2	3	3	0	6	1	6	6	5	3	0	0	2	0	0	5	0	4	3	4	2	1	0	0	3	0	4	0	5	4	0	4
COX4I1	P13073	Cytochrome c oxidase subunit 4 isoform 1, mitochondrial OS=Homo sapiens GN=COX4I1 PE=1 SV=1	Cytochrome c oxidase subunit 4 isoform 1, mitochondrial	5	5	5	1	5	5	5	4	0	4	4	3	2	3	3	5	4	1	4	3	3	3	3	2	0	1	2	1	1	2	1	2	0	1	1	0	1	2	0	0	2	0	1	0	0	0
COX5A	P20674	Cytochrome c oxidase subunit 5A, mitochondrial OS=Homo sapiens GN=COX5A PE=1 SV=2	Cytochrome c oxidase subunit 5A, mitochondrial	2	2	2	1	2	2	2	2	1	2	0	2	2	2	2	2	2	0	2	2	2	2	2	1	0	0	0	0	1	2	0	1	0	1	1	0	0	1	1	0	2	0	0	0	0	0
COX5B	P10606	Cytochrome c oxidase subunit 5B, mitochondrial OS=Homo sapiens GN=COX5B PE=1 SV=2	Cytochrome c oxidase subunit 5B, mitochondrial	2	2	2	1	2	2	2	1	0	2	2	2	0	2	2	2	2	0	2	2	2	2	2	1	0	0	1	0	0	2	1	0	0	0	0	0	0	0	1	0	2	0	1	0	0	1
COX7A2	P14406	Cytochrome c oxidase subunit 7A2, mitochondrial OS=Homo sapiens GN=COX7A2 PE=1 SV=1	Cytochrome c oxidase subunit 7A2, mitochondrial	2	2	2	1	2	2	2	2	0	0	0	0	0	2	2	2	2	1	2	1	1	2	1	0	0	0	0	0	0	2	0	0	0	0	0	0	0	0	1	0	2	0	0	1	0	1
CPA4	Q9UI42	Carboxypeptidase A4 OS=Homo sapiens GN=CPA4 PE=1 SV=2	Carboxypeptidase A4	6	6	6	1	6	6	6	2	3	2	2	2	3	2	4	1	2	3	2	3	3	2	2	2	2	1	2	0	2	3	3	0	0	3	1	0	1	1	5	0	2	0	5	5	0	4
CPA5	Q8WXQ8	Carboxypeptidase A5 OS=Homo sapiens GN=CPA5 PE=2 SV=1;Carboxypeptidase A2 OS=Homo sapiens GN=CPA2 PE=1 SV=3	Carboxypeptidase A5;Carboxypeptidase A2	2;1	2;1	2;1	2	2	2	2	0	0	1	1	0	0	0	0	0	0	0	0	0	0	0	0	1	0	0	0	1	0	0	0	0	0	0	0	0	0	0	0	0	0	0	1	1	0	0
CPD	O75976	Carboxypeptidase D OS=Homo sapiens GN=CPD PE=1 SV=2	Carboxypeptidase D	8	8	8	1	8	8	8	2	0	5	7	8	2	7	7	6	6	1	3	5	3	4	4	0	0	0	0	0	0	0	0	2	1	2	0	0	0	0	3	0	0	0	1	1	0	0
CPE	P16870	Carboxypeptidase E OS=Homo sapiens GN=CPE PE=1 SV=1	Carboxypeptidase E	2	2	2	1	2	2	2	0	0	0	0	0	0	0	0	0	0	0	0	0	0	0	0	0	0	0	0	0	0	0	0	0	0	0	0	0	0	0	0	0	0	0	1	2	0	1
CPM	P14384	Carboxypeptidase M OS=Homo sapiens GN=CPM PE=1 SV=2	Carboxypeptidase M	6	6	6	1	6	6	6	5	1	4	5	5	2	5	4	1	4	1	5	1	5	5	3	4	0	1	0	0	0	4	1	2	0	1	1	2	0	1	1	2	4	0	0	0	0	0
CPNE1	Q99829	Copine-1 OS=Homo sapiens GN=CPNE1 PE=1 SV=1	Copine-1	9	9	9	1	9	9	9	6	0	7	6	8	4	6	6	6	6	2	7	3	6	5	4	3	0	0	3	1	0	3	2	6	1	5	2	0	1	0	3	0	3	0	5	2	0	2
CPNE3	O75131	Copine-3 OS=Homo sapiens GN=CPNE3 PE=1 SV=1	Copine-3	10;1;1;1;1;1;1	10;1;1;1;1;1;1	9;0;0;0;0;0;0	7	10	10	9	7	4	9	7	8	5	6	5	9	7	3	7	4	7	7	4	3	0	0	4	3	0	6	3	4	2	3	0	0	0	1	3	0	5	0	7	5	0	3
CPQ	Q9Y646	Carboxypeptidase Q OS=Homo sapiens GN=CPQ PE=1 SV=1	Carboxypeptidase Q	3	3	3	1	3	3	3	3	0	2	3	3	1	3	2	3	2	0	2	1	2	2	2	0	0	0	0	0	0	2	0	0	1	0	0	0	1	0	0	0	1	0	1	0	0	0
CPSF7	Q8N684	Cleavage and polyadenylation specificity factor subunit 7 OS=Homo sapiens GN=CPSF7 PE=1 SV=1	Cleavage and polyadenylation specificity factor subunit 7	2	2	2	1	2	2	2	0	0	1	1	1	0	2	2	2	2	1	0	2	0	0	0	0	0	0	0	0	0	0	0	1	0	0	0	0	0	0	1	0	0	0	0	0	0	0
CRABP2	P29373	Cellular retinoic acid-binding protein 2 OS=Homo sapiens GN=CRABP2 PE=1 SV=2	Cellular retinoic acid-binding protein 2	3;1	3;1	3;1	2	3	3	3	3	1	3	3	3	3	3	2	2	3	2	3	2	3	3	3	2	0	0	0	2	0	3	3	1	0	1	0	0	0	1	2	1	3	0	1	1	0	0
CRIM1	Q9NZV1	Cysteine-rich motor neuron 1 protein OS=Homo sapiens GN=CRIM1 PE=1 SV=1	Cysteine-rich motor neuron 1 protein;Processed cysteine-rich motor neuron 1 protein	3	3	3	1	3	3	3	0	0	0	0	0	0	0	0	0	0	0	1	0	0	0	1	0	0	0	2	0	0	0	0	0	0	0	0	0	0	0	0	0	1	0	0	0	0	0
CRIP2	P52943	Cysteine-rich protein 2 OS=Homo sapiens GN=CRIP2 PE=1 SV=1	Cysteine-rich protein 2	2	2	2	1	2	2	2	2	0	2	2	2	1	2	1	2	2	0	2	0	0	0	0	0	0	0	0	0	0	2	0	0	0	0	0	0	0	0	0	0	1	0	0	0	0	0
CRK	P46108	Adapter molecule crk OS=Homo sapiens GN=CRK PE=1 SV=2	Adapter molecule crk	6	6	6	1	6	6	6	5	0	5	5	5	1	5	4	4	5	1	5	2	4	4	3	0	0	0	0	0	0	2	1	1	0	2	0	1	0	0	2	0	2	0	1	2	0	1
CRNN	Q9UBG3	Cornulin OS=Homo sapiens GN=CRNN PE=1 SV=1	Cornulin	5	5	5	1	5	5	5	1	0	1	0	1	0	0	0	1	0	2	0	0	1	0	2	2	0	0	0	0	0	0	2	0	0	0	0	0	0	0	0	0	0	0	4	3	0	2
CRTAP	O75718	Cartilage-associated protein OS=Homo sapiens GN=CRTAP PE=1 SV=1	Cartilage-associated protein	4	4	4	1	4	4	4	3	0	4	3	3	0	3	4	4	4	0	2	3	2	2	2	0	0	0	2	0	0	2	0	1	0	0	0	0	0	0	0	0	0	0	0	0	0	0
CRYAB	P02511	Alpha-crystallin B chain OS=Homo sapiens GN=CRYAB PE=1 SV=2	Alpha-crystallin B chain	4	4	4	1	4	4	4	3	0	2	3	1	2	3	3	4	4	1	3	2	3	3	2	3	0	0	1	1	0	3	0	1	0	0	0	0	0	0	1	0	3	0	1	0	0	1
CS	O75390	Citrate synthase, mitochondrial OS=Homo sapiens GN=CS PE=1 SV=2	Citrate synthase, mitochondrial	4	4	4	1	4	4	4	2	0	2	1	2	0	3	1	4	2	1	1	2	2	2	2	0	0	0	1	0	0	1	3	1	0	0	0	0	0	0	2	0	1	0	2	2	0	2
CSDE1	O75534	Cold shock domain-containing protein E1 OS=Homo sapiens GN=CSDE1 PE=1 SV=2	Cold shock domain-containing protein E1	9	9	9	1	9	9	9	6	0	8	5	6	1	2	3	9	8	0	3	2	3	3	2	0	0	0	0	0	0	0	0	2	0	1	0	0	0	0	2	0	0	0	1	0	0	0
CSE1L	P55060	Exportin-2 OS=Homo sapiens GN=CSE1L PE=1 SV=3	Exportin-2	14	14	14	1	14	14	14	8	0	7	8	7	1	6	5	13	10	0	6	2	10	7	2	0	0	0	1	1	1	0	0	2	2	2	1	0	0	1	2	1	0	0	0	2	0	1
CSN2	P05814	Beta-casein OS=Homo sapiens GN=CSN2 PE=1 SV=4	Beta-casein	2	2	2	1	2	2	2	0	0	0	0	0	0	0	0	0	0	0	0	0	0	0	0	0	0	0	0	0	0	0	0	1	2	1	1	0	0	0	1	0	0	0	0	0	0	0
CSNK1A1	P48729	Casein kinase I isoform alpha OS=Homo sapiens GN=CSNK1A1 PE=1 SV=2	Casein kinase I isoform alpha	3;1	3;1	3;1	2	3	3	3	1	0	0	1	1	0	1	0	2	1	0	1	0	1	1	1	0	0	0	0	0	0	1	0	0	0	0	0	0	0	0	1	0	1	0	1	0	0	1
CSNK2A1	P68400	Casein kinase II subunit alpha OS=Homo sapiens GN=CSNK2A1 PE=1 SV=1;Casein kinase II subunit alpha 3 OS=Homo sapiens GN=CSNK2A3 PE=1 SV=2	Casein kinase II subunit alpha;Casein kinase II subunit alpha 3	12;10	12;10	12;10	2	12	12	12	7	0	7	5	7	1	11	9	12	12	4	6	8	4	4	1	0	0	1	1	0	0	2	0	1	0	1	3	0	3	5	5	0	0	0	3	2	0	0
CSNK2A2	P19784	Casein kinase II subunit alpha OS=Homo sapiens GN=CSNK2A2 PE=1 SV=1	Casein kinase II subunit alpha	10	10	10	1	10	10	10	6	0	4	5	7	1	8	10	10	9	0	4	6	2	3	1	0	0	0	0	0	1	1	0	0	0	1	0	0	0	1	2	0	1	0	1	0	0	0
CSNK2B	P67870	Casein kinase II subunit beta OS=Homo sapiens GN=CSNK2B PE=1 SV=1	Casein kinase II subunit beta	6	6	6	1	6	6	6	3	0	4	4	3	1	5	3	6	6	4	3	5	1	3	1	0	0	0	0	0	0	0	0	2	1	3	2	1	1	3	2	0	0	0	1	0	0	0
CSPG4	Q6UVK1	Chondroitin sulfate proteoglycan 4 OS=Homo sapiens GN=CSPG4 PE=1 SV=2	Chondroitin sulfate proteoglycan 4	51	51	51	1	51	51	51	41	0	43	46	43	31	39	29	29	32	1	40	12	32	35	28	11	1	1	31	20	0	36	4	25	9	22	6	3	1	3	9	1	21	1	31	28	0	19
CSRP1	P21291	Cysteine and glycine-rich protein 1 OS=Homo sapiens GN=CSRP1 PE=1 SV=3	Cysteine and glycine-rich protein 1	5	5	5	1	5	5	5	4	0	5	5	4	1	4	4	3	2	0	4	1	4	5	1	0	0	0	0	0	0	3	0	0	0	1	0	0	0	0	1	0	2	0	3	4	0	4
CST1	P01037	Cystatin-SN OS=Homo sapiens GN=CST1 PE=1 SV=3	Cystatin-SN	3	2	2	1	3	2	2	3	0	3	3	3	0	3	2	2	2	1	3	3	3	3	2	2	0	1	0	0	0	3	2	0	0	0	0	1	1	0	2	1	3	0	3	3	1	3
CST4	P01036	Cystatin-S OS=Homo sapiens GN=CST4 PE=1 SV=3	Cystatin-S	5;2	5;2	4;2	2	5	5	4	4	1	4	4	4	1	4	3	2	3	2	4	4	4	3	2	3	1	1	1	1	0	4	2	1	0	1	1	1	0	0	3	0	4	0	4	4	0	5
CST6	Q15828	Cystatin-M OS=Homo sapiens GN=CST6 PE=1 SV=1	Cystatin-M	2	2	2	1	2	2	2	1	1	1	1	1	1	1	1	0	1	1	1	1	1	1	1	1	1	1	1	1	1	1	1	1	0	0	1	1	1	1	1	2	1	0	1	1	0	1
CSTA	P01040	Cystatin-A OS=Homo sapiens GN=CSTA PE=1 SV=1	Cystatin-A;Cystatin-A, N-terminally processed	11	11	11	1	11	11	11	7	8	8	7	7	8	7	8	8	7	7	8	7	9	8	10	8	6	7	7	7	5	7	7	9	4	9	4	5	4	6	8	5	6	2	9	8	6	10
CSTB	P04080	Cystatin-B OS=Homo sapiens GN=CSTB PE=1 SV=2	Cystatin-B	4	4	4	1	4	4	4	3	1	3	3	3	1	3	2	3	2	1	2	1	2	2	2	3	1	0	1	1	1	3	1	1	1	1	0	1	0	0	1	1	3	1	3	3	1	4
CTHRC1	Q96CG8	Collagen triple helix repeat-containing protein 1 OS=Homo sapiens GN=CTHRC1 PE=1 SV=1	Collagen triple helix repeat-containing protein 1	6	6	6	1	6	6	6	6	3	0	1	1	0	0	1	4	1	0	6	0	4	6	6	6	1	3	5	6	1	6	5	0	1	0	0	0	0	0	2	0	6	1	4	5	2	4
CTNNA1	P35221	Catenin alpha-1 OS=Homo sapiens GN=CTNNA1 PE=1 SV=1	Catenin alpha-1	23;1	23;1	20;1	2	23	23	20	22	1	19	19	18	7	11	8	10	11	1	16	3	16	18	14	5	0	0	3	1	0	14	1	6	2	7	0	0	0	0	2	0	6	0	10	8	0	5
CTNNB1	P35222	Catenin beta-1 OS=Homo sapiens GN=CTNNB1 PE=1 SV=1	Catenin beta-1	13	11	11	1	13	11	11	13	0	10	8	8	2	8	6	7	5	1	13	1	9	9	7	3	0	0	0	0	0	8	0	2	0	1	1	0	0	0	1	1	7	0	9	5	0	5
CTNND1	O60716	Catenin delta-1 OS=Homo sapiens GN=CTNND1 PE=1 SV=1	Catenin delta-1	14	14	14	1	14	14	14	12	0	7	7	6	0	2	0	6	2	0	12	0	10	11	8	3	0	0	1	0	0	8	0	2	1	1	0	0	0	0	2	0	4	0	6	7	1	4
CTPS1	P17812	CTP synthase 1 OS=Homo sapiens GN=CTPS1 PE=1 SV=2	CTP synthase 1	6;2	6;2	6;2	2	6	6	6	3	0	3	3	3	0	2	2	6	4	0	2	1	2	2	2	0	0	0	0	0	0	1	0	0	0	0	1	0	0	0	0	0	1	0	0	0	0	0
CTSA	P10619	Lysosomal protective protein OS=Homo sapiens GN=CTSA PE=1 SV=2	Lysosomal protective protein;Lysosomal protective protein 32 kDa chain;Lysosomal protective protein 20 kDa chain	4	4	4	1	4	4	4	2	1	2	3	3	1	3	2	3	3	0	2	1	2	2	2	2	1	0	1	0	0	2	1	1	0	1	0	0	0	0	1	1	2	0	1	1	0	1
CTSB	P07858	Cathepsin B OS=Homo sapiens GN=CTSB PE=1 SV=3	Cathepsin B;Cathepsin B light chain;Cathepsin B heavy chain	4	4	4	1	4	4	4	3	0	1	2	2	1	3	3	3	3	1	3	3	2	2	2	3	0	0	1	0	0	3	1	1	0	0	0	0	0	0	1	1	3	0	3	4	0	2
CTSC	P53634	Dipeptidyl peptidase 1 OS=Homo sapiens GN=CTSC PE=1 SV=2	Dipeptidyl peptidase 1;Dipeptidyl peptidase 1 exclusion domain chain;Dipeptidyl peptidase 1 heavy chain;Dipeptidyl peptidase 1 light chain	3	3	3	1	3	3	3	1	1	3	3	3	1	3	3	1	1	1	1	0	1	2	2	1	0	0	0	0	0	2	0	1	0	0	0	0	0	0	2	0	1	0	2	1	0	1
CTSD	P07339	Cathepsin D OS=Homo sapiens GN=CTSD PE=1 SV=1	Cathepsin D;Cathepsin D light chain;Cathepsin D heavy chain	17	17	17	1	17	17	17	14	9	14	14	15	8	14	12	13	14	12	14	11	11	12	11	9	7	7	7	6	6	14	7	8	6	7	6	3	5	4	7	8	11	5	10	10	4	10
CTSV	O60911	Cathepsin L2 OS=Homo sapiens GN=CTSV PE=1 SV=2	Cathepsin L2	2	2	2	1	2	2	2	1	0	2	1	2	1	1	2	0	1	2	1	2	2	2	2	2	0	0	0	0	0	2	0	0	0	0	0	0	0	0	1	0	1	1	2	2	0	2
CTTN	Q14247	Src substrate cortactin OS=Homo sapiens GN=CTTN PE=1 SV=2	Src substrate cortactin	4	4	4	1	4	4	4	4	0	3	3	3	1	3	3	4	3	0	4	0	4	4	3	2	0	0	1	0	0	4	0	1	0	2	0	2	0	0	2	0	1	0	2	1	0	1
CUL3	Q13618	Cullin-3 OS=Homo sapiens GN=CUL3 PE=1 SV=2	Cullin-3	2	2	2	1	2	2	2	1	0	2	1	1	0	0	1	2	1	0	0	0	1	1	0	0	0	0	0	0	0	1	0	0	0	0	0	0	0	0	0	0	0	0	0	0	0	0
CUL5	Q93034	Cullin-5 OS=Homo sapiens GN=CUL5 PE=1 SV=4	Cullin-5	2	2	2	1	2	2	2	2	0	2	2	2	0	2	2	2	2	0	2	2	2	2	2	0	0	0	0	0	0	2	0	1	0	0	0	0	1	0	0	0	0	0	0	0	0	0
CUTA	O60888	Protein CutA OS=Homo sapiens GN=CUTA PE=1 SV=2	Protein CutA	2	2	2	1	2	2	2	2	0	2	2	2	2	2	2	2	2	2	2	2	2	2	2	2	0	0	0	0	0	2	1	1	1	1	1	1	0	0	1	0	2	0	1	1	0	1
CYB5A	P00167	Cytochrome b5 OS=Homo sapiens GN=CYB5A PE=1 SV=2	Cytochrome b5	4	4	4	1	4	4	4	4	0	4	4	3	2	4	4	4	4	2	3	1	0	2	0	1	0	0	0	0	0	2	0	2	0	2	0	0	0	0	0	0	2	0	3	2	1	2
CYB5B	O43169	Cytochrome b5 type B OS=Homo sapiens GN=CYB5B PE=1 SV=2	Cytochrome b5 type B	2	2	2	1	2	2	2	2	0	2	2	2	1	2	1	2	2	0	2	0	0	0	1	0	0	0	0	0	0	1	0	0	0	0	1	0	0	1	0	0	1	0	0	0	0	0
CYB5R3	P00387	NADH-cytochrome b5 reductase 3 OS=Homo sapiens GN=CYB5R3 PE=1 SV=3	NADH-cytochrome b5 reductase 3;NADH-cytochrome b5 reductase 3 membrane-bound form;NADH-cytochrome b5 reductase 3 soluble form	4	4	4	1	4	4	4	4	0	3	2	3	1	3	2	3	3	0	3	0	3	2	3	0	0	0	1	0	0	1	1	1	0	1	0	0	0	0	0	0	0	0	3	3	0	2
CYBRD1	Q53TN4	Cytochrome b reductase 1 OS=Homo sapiens GN=CYBRD1 PE=1 SV=1	Cytochrome b reductase 1	2	2	2	1	2	2	2	1	0	1	1	1	1	1	1	1	1	0	1	0	1	1	1	0	1	1	0	0	0	0	0	1	1	1	1	0	0	1	1	0	0	0	1	1	0	2
CYFIP1	Q7L576	Cytoplasmic FMR1-interacting protein 1 OS=Homo sapiens GN=CYFIP1 PE=1 SV=1	Cytoplasmic FMR1-interacting protein 1	15	15	6	1	15	15	6	12	0	12	13	12	4	10	5	13	8	0	11	3	12	12	12	1	0	0	3	2	0	7	0	8	1	6	0	0	0	1	5	0	5	0	9	6	0	3
CYR61	O00622	Protein CYR61 OS=Homo sapiens GN=CYR61 PE=1 SV=1	Protein CYR61	2	2	2	1	2	2	2	1	0	0	0	0	0	1	1	1	1	0	0	1	0	1	1	0	0	0	1	0	0	0	0	0	0	0	0	0	0	0	1	0	0	0	0	0	0	1
DAB2	P98082	Disabled homolog 2 OS=Homo sapiens GN=DAB2 PE=1 SV=3	Disabled homolog 2	2	2	2	1	2	2	2	2	0	2	2	1	0	1	0	0	0	0	2	0	2	2	2	0	0	0	0	0	0	1	0	1	0	1	0	0	0	0	0	0	1	0	0	0	0	0
DAD1	P61803	Dolichyl-diphosphooligosaccharide--protein glycosyltransferase subunit DAD1 OS=Homo sapiens GN=DAD1 PE=1 SV=3	Dolichyl-diphosphooligosaccharide--protein glycosyltransferase subunit DAD1	3	3	3	1	3	3	3	1	1	2	1	2	2	1	3	3	2	1	2	1	2	2	2	3	0	0	1	1	0	1	2	2	1	3	0	0	0	0	2	0	1	0	2	2	0	2
DAG1	Q14118	Dystroglycan OS=Homo sapiens GN=DAG1 PE=1 SV=2	Dystroglycan;Alpha-dystroglycan;Beta-dystroglycan	2	2	2	1	2	2	2	2	0	2	2	2	0	1	2	2	2	0	2	1	2	2	2	0	0	0	0	0	0	2	0	1	0	1	0	0	0	0	0	0	0	0	2	2	0	1
DARS	P14868	Aspartate--tRNA ligase, cytoplasmic OS=Homo sapiens GN=DARS PE=1 SV=2	Aspartate--tRNA ligase, cytoplasmic	21	21	21	1	21	21	21	5	0	13	8	14	4	11	12	20	17	2	7	8	7	8	6	0	0	0	3	1	0	1	2	6	0	3	1	1	0	2	6	0	3	0	4	4	0	0
DAZAP1	Q96EP5	DAZ-associated protein 1 OS=Homo sapiens GN=DAZAP1 PE=1 SV=1	DAZ-associated protein 1	2	2	2	1	2	2	2	2	0	2	2	2	0	2	2	2	2	0	1	1	0	0	1	0	0	0	0	0	0	0	0	0	1	0	0	0	0	0	1	0	1	0	0	0	0	1
DBI	P07108	Acyl-CoA-binding protein OS=Homo sapiens GN=DBI PE=1 SV=2	Acyl-CoA-binding protein	6	6	6	1	6	6	6	5	0	5	5	5	2	4	4	4	3	1	4	4	4	5	4	4	0	0	1	0	0	4	1	3	1	1	0	0	0	0	0	1	3	0	3	2	0	4
DBN1	Q16643	Drebrin OS=Homo sapiens GN=DBN1 PE=1 SV=4	Drebrin	6	6	6	1	6	6	6	5	0	6	6	6	2	5	3	5	5	0	5	1	3	3	1	2	0	0	1	0	0	1	0	2	0	2	0	0	0	0	1	0	0	0	2	2	0	1
DBNL	Q9UJU6	Drebrin-like protein OS=Homo sapiens GN=DBNL PE=1 SV=1	Drebrin-like protein	3	3	3	1	3	3	3	1	0	2	2	2	0	2	1	2	2	0	2	0	2	2	2	1	0	0	0	0	0	2	1	1	0	0	0	0	0	0	0	0	2	0	1	1	0	0
DCAF7	P61962	DDB1- and CUL4-associated factor 7 OS=Homo sapiens GN=DCAF7 PE=1 SV=1	DDB1- and CUL4-associated factor 7	2	2	2	1	2	2	2	1	0	0	0	1	0	0	0	2	1	0	0	0	0	0	0	0	0	0	0	0	0	1	0	0	0	0	0	0	0	0	0	0	0	0	1	0	0	1
DCBLD2	Q96PD2	Discoidin, CUB and LCCL domain-containing protein 2 OS=Homo sapiens GN=DCBLD2 PE=1 SV=1	Discoidin, CUB and LCCL domain-containing protein 2	2	2	2	1	2	2	2	2	1	2	2	2	1	2	0	1	0	0	2	0	2	2	2	0	0	0	1	0	0	2	0	1	0	1	0	0	0	0	0	0	1	0	2	1	0	2
DCD	P81605	Dermcidin OS=Homo sapiens GN=DCD PE=1 SV=2	Dermcidin;Survival-promoting peptide;DCD-1	5	5	5	1	5	5	5	4	4	5	5	4	4	5	5	5	5	5	5	5	5	5	5	4	4	4	4	4	4	5	4	4	4	4	4	4	4	4	4	4	5	4	5	5	4	4
DCTN1	Q14203	Dynactin subunit 1 OS=Homo sapiens GN=DCTN1 PE=1 SV=3	Dynactin subunit 1	17	17	17	1	17	17	17	12	0	14	16	16	5	13	12	16	14	6	10	9	9	10	8	1	0	0	4	1	0	6	2	7	1	5	0	1	0	1	6	2	4	0	3	3	0	3
DCTN2	Q13561	Dynactin subunit 2 OS=Homo sapiens GN=DCTN2 PE=1 SV=4	Dynactin subunit 2	10	10	10	1	10	10	10	10	0	10	10	10	5	9	9	9	10	2	9	6	8	8	5	4	0	0	0	0	0	9	1	3	1	5	1	1	0	1	7	0	7	0	8	8	0	8
DCTN3	O75935	Dynactin subunit 3 OS=Homo sapiens GN=DCTN3 PE=1 SV=1	Dynactin subunit 3	4	4	4	1	4	4	4	3	0	4	4	4	2	3	3	4	4	1	3	1	2	2	2	0	0	0	1	0	0	1	0	2	1	2	0	0	0	2	2	0	0	0	2	1	1	1
DCTN4	Q9UJW0	Dynactin subunit 4 OS=Homo sapiens GN=DCTN4 PE=1 SV=1	Dynactin subunit 4	2	2	2	1	2	2	2	1	0	2	2	2	1	2	2	2	2	0	1	0	2	2	2	0	0	0	0	0	0	1	0	1	0	0	0	0	0	0	1	0	1	0	1	1	0	0
DDAH1	O94760	N(G),N(G)-dimethylarginine dimethylaminohydrolase 1 OS=Homo sapiens GN=DDAH1 PE=1 SV=3	N(G),N(G)-dimethylarginine dimethylaminohydrolase 1	8	7	7	1	8	7	7	7	0	6	6	7	3	7	3	3	2	0	6	3	7	7	3	2	0	0	0	0	1	5	1	2	0	1	0	0	1	0	1	0	5	0	4	4	1	3
DDAH2	O95865	N(G),N(G)-dimethylarginine dimethylaminohydrolase 2 OS=Homo sapiens GN=DDAH2 PE=1 SV=1	N(G),N(G)-dimethylarginine dimethylaminohydrolase 2	8	8	7	1	8	8	7	8	0	7	8	8	3	7	5	6	6	1	8	5	8	8	8	5	0	0	1	0	0	8	4	2	0	1	0	0	1	0	5	0	5	0	6	5	0	4
DDB1	Q16531	DNA damage-binding protein 1 OS=Homo sapiens GN=DDB1 PE=1 SV=1	DNA damage-binding protein 1	21	21	21	1	21	21	21	10	1	18	19	18	9	18	17	20	14	3	10	5	5	8	7	3	1	1	0	0	0	8	1	7	1	8	0	1	0	3	6	0	4	1	3	2	0	3
DDOST	P39656	Dolichyl-diphosphooligosaccharide--protein glycosyltransferase 48 kDa subunit OS=Homo sapiens GN=DDOST PE=1 SV=4	Dolichyl-diphosphooligosaccharide--protein glycosyltransferase 48 kDa subunit	10	10	10	1	10	10	10	8	2	9	9	9	4	9	8	10	9	4	8	6	7	8	6	4	1	0	1	1	2	8	2	3	1	1	1	1	1	0	3	0	7	0	2	3	0	3
DDR2	Q16832	Discoidin domain-containing receptor 2 OS=Homo sapiens GN=DDR2 PE=1 SV=2	Discoidin domain-containing receptor 2	5;1	5;1	5;1	2	5	5	5	3	0	1	1	1	0	1	1	0	0	0	3	0	2	2	1	1	0	0	2	0	0	2	1	0	0	0	0	0	0	1	0	0	2	0	1	2	0	0
DDT	P30046	D-dopachrome decarboxylase OS=Homo sapiens GN=DDT PE=1 SV=3;D-dopachrome decarboxylase-like protein OS=Homo sapiens GN=DDTL PE=2 SV=1	D-dopachrome decarboxylase;D-dopachrome decarboxylase-like protein	4;3	4;3	4;3	2	4	4	4	3	1	4	4	4	0	3	1	2	2	0	3	1	3	2	1	0	0	0	1	1	0	1	0	0	2	0	1	0	0	0	1	0	0	0	0	0	0	0
DDX1	Q92499	ATP-dependent RNA helicase DDX1 OS=Homo sapiens GN=DDX1 PE=1 SV=2	ATP-dependent RNA helicase DDX1	17	17	17	1	17	17	17	9	0	12	12	13	1	11	10	14	12	2	4	6	5	7	2	0	0	1	0	0	0	4	0	4	1	1	1	0	0	2	7	0	1	1	4	2	0	0
DDX17	Q92841	Probable ATP-dependent RNA helicase DDX17 OS=Homo sapiens GN=DDX17 PE=1 SV=2	Probable ATP-dependent RNA helicase DDX17	20	19	14	1	20	19	14	5	0	13	13	15	3	10	13	19	17	1	1	5	2	2	1	1	0	0	2	1	0	1	1	6	1	3	0	1	1	2	7	0	0	0	3	0	0	2
DDX19A	Q9NUU7	ATP-dependent RNA helicase DDX19A OS=Homo sapiens GN=DDX19A PE=1 SV=1;ATP-dependent RNA helicase DDX19B OS=Homo sapiens GN=DDX19B PE=1 SV=1	ATP-dependent RNA helicase DDX19A;ATP-dependent RNA helicase DDX19B	2;2	2;2	2;2	2	2	2	2	2	0	1	1	1	0	0	0	2	2	0	2	0	0	0	0	0	0	0	0	0	0	0	0	0	0	0	0	0	0	0	0	0	1	0	1	0	0	0
DDX20	Q9UHI6	Probable ATP-dependent RNA helicase DDX20 OS=Homo sapiens GN=DDX20 PE=1 SV=2	Probable ATP-dependent RNA helicase DDX20	3	3	3	1	3	3	3	0	0	0	0	0	0	1	0	2	1	0	0	0	0	0	0	0	0	0	1	1	0	0	0	1	1	1	1	0	0	1	2	0	0	0	0	0	0	0
DDX21	Q9NR30	Nucleolar RNA helicase 2 OS=Homo sapiens GN=DDX21 PE=1 SV=5	Nucleolar RNA helicase 2	7;1	7;1	7;1	2	7	7	7	0	0	1	0	0	0	0	1	6	5	0	0	1	0	0	0	0	0	0	1	1	0	0	1	0	0	0	0	0	0	0	1	0	0	0	0	0	0	0
DDX24	Q9GZR7	ATP-dependent RNA helicase DDX24 OS=Homo sapiens GN=DDX24 PE=1 SV=1	ATP-dependent RNA helicase DDX24	2	2	2	1	2	2	2	0	0	0	0	0	0	0	0	2	1	0	0	0	0	0	0	0	0	0	0	0	0	0	0	0	1	0	0	0	0	0	0	0	0	0	0	0	0	0
DDX39B	Q13838	Spliceosome RNA helicase DDX39B OS=Homo sapiens GN=DDX39B PE=1 SV=1	Spliceosome RNA helicase DDX39B	9	9	3	1	9	9	3	4	0	7	8	9	2	6	6	9	9	1	2	5	2	1	2	2	0	0	1	0	0	2	1	3	0	4	0	0	0	1	3	0	2	0	4	2	0	1
DDX3X	O00571	ATP-dependent RNA helicase DDX3X OS=Homo sapiens GN=DDX3X PE=1 SV=3	ATP-dependent RNA helicase DDX3X	21;1	21;1	8;0	2	21	21	8	11	0	13	13	14	7	15	13	20	19	3	6	9	9	9	6	1	0	0	2	1	0	5	3	4	2	6	0	2	4	7	10	1	2	0	7	4	0	3
DDX3Y	O15523	ATP-dependent RNA helicase DDX3Y OS=Homo sapiens GN=DDX3Y PE=1 SV=2	ATP-dependent RNA helicase DDX3Y	16	3	3	1	16	3	3	9	0	10	10	11	6	12	11	16	14	2	4	6	8	7	5	1	0	0	2	1	0	4	3	4	2	4	0	1	4	6	7	1	2	0	6	3	0	2
DDX46	Q7L014	Probable ATP-dependent RNA helicase DDX46 OS=Homo sapiens GN=DDX46 PE=1 SV=2	Probable ATP-dependent RNA helicase DDX46	6	6	6	1	6	6	6	0	0	4	2	3	0	1	3	5	5	0	0	1	0	0	0	0	0	0	0	0	0	0	0	1	0	1	0	0	0	1	2	0	0	0	0	0	0	0
DDX5	P17844	Probable ATP-dependent RNA helicase DDX5 OS=Homo sapiens GN=DDX5 PE=1 SV=1	Probable ATP-dependent RNA helicase DDX5	17	11	11	1	17	11	11	6	0	9	11	10	3	8	9	16	13	1	2	5	2	1	1	1	1	0	3	0	1	1	1	4	1	3	0	0	2	3	7	0	0	0	3	1	0	2
DDX6	P26196	Probable ATP-dependent RNA helicase DDX6 OS=Homo sapiens GN=DDX6 PE=1 SV=2	Probable ATP-dependent RNA helicase DDX6	6	6	6	1	6	6	6	4	0	5	5	5	0	3	2	5	5	0	3	1	5	4	3	0	0	0	0	0	0	1	0	2	0	0	0	0	0	0	2	0	1	0	2	0	0	0
DEK	P35659	Protein DEK OS=Homo sapiens GN=DEK PE=1 SV=1	Protein DEK	2	2	2	1	2	2	2	0	0	0	0	0	0	0	0	1	2	0	0	0	0	0	0	0	0	0	0	0	0	0	0	0	0	0	0	0	0	0	0	0	0	0	0	0	0	0
DERA	Q9Y315	Deoxyribose-phosphate aldolase OS=Homo sapiens GN=DERA PE=1 SV=2	Deoxyribose-phosphate aldolase	4	4	4	1	4	4	4	2	0	4	4	4	0	4	3	4	4	3	3	4	3	4	4	0	0	0	0	0	0	4	2	0	0	0	0	0	0	0	2	0	1	0	2	0	0	1
DFNA5	O60443	Non-syndromic hearing impairment protein 5 OS=Homo sapiens GN=DFNA5 PE=1 SV=2	Non-syndromic hearing impairment protein 5	4	4	4	1	4	4	4	1	0	3	2	2	0	1	0	3	1	0	1	0	1	1	0	0	0	0	0	0	0	1	0	1	0	1	0	0	0	0	0	0	0	0	1	1	0	0
DHCR7	Q9UBM7	7-dehydrocholesterol reductase OS=Homo sapiens GN=DHCR7 PE=1 SV=1	7-dehydrocholesterol reductase	4	4	4	1	4	4	4	3	0	3	3	3	2	3	3	4	3	1	3	2	2	3	3	0	0	0	0	0	0	2	0	3	0	2	0	0	0	1	2	0	1	0	0	0	0	0
DHRS7	Q9Y394	Dehydrogenase/reductase SDR family member 7 OS=Homo sapiens GN=DHRS7 PE=1 SV=1	Dehydrogenase/reductase SDR family member 7	5	5	5	1	5	5	5	2	0	4	3	3	1	4	4	5	3	0	1	0	2	3	3	0	0	0	0	0	0	1	0	1	0	0	0	0	0	0	2	0	0	0	1	1	0	1
DHX15	O43143	Putative pre-mRNA-splicing factor ATP-dependent RNA helicase DHX15 OS=Homo sapiens GN=DHX15 PE=1 SV=2	Pre-mRNA-splicing factor ATP-dependent RNA helicase DHX15	15;1	15;1	14;0	2	15	15	14	2	0	11	9	10	1	4	8	15	12	0	0	4	1	0	1	0	0	0	0	0	0	0	0	3	0	2	0	0	0	0	3	0	0	0	0	0	0	0
DHX16	O60231	Putative pre-mRNA-splicing factor ATP-dependent RNA helicase DHX16 OS=Homo sapiens GN=DHX16 PE=1 SV=2	Putative pre-mRNA-splicing factor ATP-dependent RNA helicase DHX16	4	3	3	1	4	3	3	0	0	2	0	2	0	0	0	4	2	0	0	0	0	0	0	0	0	0	0	0	0	0	0	0	0	0	0	0	0	0	1	0	0	0	0	0	0	0
DHX30	Q7L2E3	Putative ATP-dependent RNA helicase DHX30 OS=Homo sapiens GN=DHX30 PE=1 SV=1	Putative ATP-dependent RNA helicase DHX30	2	2	2	1	2	2	2	0	0	0	0	0	0	0	1	2	1	0	0	0	0	0	0	0	0	0	0	0	0	0	0	0	0	0	0	0	0	0	0	0	0	0	0	0	0	0
DHX9	Q08211	ATP-dependent RNA helicase A OS=Homo sapiens GN=DHX9 PE=1 SV=4	ATP-dependent RNA helicase A	27	27	27	1	27	27	27	6	0	18	15	12	2	14	17	27	23	2	1	9	0	0	1	0	0	1	0	0	1	0	0	5	1	3	1	0	0	2	6	0	0	0	0	1	1	0
DIAPH1	O60610	Protein diaphanous homolog 1 OS=Homo sapiens GN=DIAPH1 PE=1 SV=2	Protein diaphanous homolog 1	3	3	3	1	3	3	3	1	0	2	1	2	0	1	0	2	1	0	0	0	0	0	0	0	0	0	0	0	0	0	0	0	0	1	0	0	0	0	0	0	0	1	0	0	0	0
DIP2B	Q9P265	Disco-interacting protein 2 homolog B OS=Homo sapiens GN=DIP2B PE=1 SV=3	Disco-interacting protein 2 homolog B	12;1	12;1	12;1	2	12	12	12	10	0	8	9	11	0	4	2	7	2	0	10	0	12	12	11	0	0	0	0	0	0	9	0	2	0	1	0	0	0	0	0	0	1	0	2	3	0	1
DIS3	Q9Y2L1	Exosome complex exonuclease RRP44 OS=Homo sapiens GN=DIS3 PE=1 SV=2	Exosome complex exonuclease RRP44	5	5	5	1	5	5	5	0	0	2	1	2	0	2	0	5	3	0	0	0	0	0	0	0	0	0	0	0	0	0	0	0	0	0	0	0	0	0	0	0	0	0	0	0	0	1
DKC1	O60832	H/ACA ribonucleoprotein complex subunit 4 OS=Homo sapiens GN=DKC1 PE=1 SV=3	H/ACA ribonucleoprotein complex subunit 4	2	2	2	1	2	2	2	0	0	0	0	1	0	0	0	2	2	0	0	0	0	0	0	0	0	0	0	0	0	0	0	0	0	0	0	0	0	0	0	0	0	0	0	0	0	0
DLD	P09622	Dihydrolipoyl dehydrogenase, mitochondrial OS=Homo sapiens GN=DLD PE=1 SV=2	Dihydrolipoyl dehydrogenase, mitochondrial	3	3	3	1	3	3	3	2	1	2	1	3	1	2	3	3	3	1	2	2	0	1	1	2	0	0	0	1	0	1	0	1	0	0	0	0	0	0	1	0	1	0	2	2	0	1
DLG1	Q12959	Disks large homolog 1 OS=Homo sapiens GN=DLG1 PE=1 SV=2	Disks large homolog 1	6	6	6	1	6	6	6	6	0	6	6	6	1	4	2	4	4	0	6	0	4	4	3	1	0	0	1	0	0	4	0	1	0	0	0	0	0	0	1	0	1	0	0	1	0	0
DLST	P36957	Dihydrolipoyllysine-residue succinyltransferase component of 2-oxoglutarate dehydrogenase complex, mitochondrial OS=Homo sapiens GN=DLST PE=1 SV=4	Dihydrolipoyllysine-residue succinyltransferase component of 2-oxoglutarate dehydrogenase complex, mitochondrial	4	4	4	1	4	4	4	3	0	1	2	2	0	3	3	3	3	1	3	2	2	4	3	2	0	0	1	0	0	3	1	0	0	0	0	0	0	0	0	0	2	0	1	1	0	1
DMBT1	Q9UGM3	Deleted in malignant brain tumors 1 protein OS=Homo sapiens GN=DMBT1 PE=1 SV=2	Deleted in malignant brain tumors 1 protein	4	4	4	1	4	4	4	1	1	1	1	1	0	0	1	0	1	1	1	2	1	1	2	1	0	0	1	0	0	1	1	0	0	0	0	0	0	0	0	0	1	0	1	1	0	1
DNAAF2	Q9NVR5	Protein kintoun OS=Homo sapiens GN=DNAAF2 PE=1 SV=2	Protein kintoun	2	2	2	1	2	2	2	2	0	1	2	2	0	2	1	1	2	2	2	2	0	1	2	1	0	0	0	0	0	1	0	1	0	0	0	0	0	0	0	0	2	0	0	0	0	0
DNAH3	Q8TD57	Dynein heavy chain 3, axonemal OS=Homo sapiens GN=DNAH3 PE=2 SV=1	Dynein heavy chain 3, axonemal	2	2	2	1	2	2	2	0	0	0	0	0	0	0	0	0	0	0	1	0	0	1	1	0	0	0	1	1	0	0	0	0	1	0	0	1	0	0	0	1	0	0	1	0	1	0
DNAH5	Q8TE73	Dynein heavy chain 5, axonemal OS=Homo sapiens GN=DNAH5 PE=1 SV=3	Dynein heavy chain 5, axonemal	3	3	3	1	3	3	3	3	2	3	2	2	1	1	2	3	2	2	3	2	1	1	1	2	0	0	0	1	0	3	2	1	0	0	0	0	0	0	2	0	3	0	2	2	0	1
DNAJA1	P31689	DnaJ homolog subfamily A member 1 OS=Homo sapiens GN=DNAJA1 PE=1 SV=2	DnaJ homolog subfamily A member 1	14	14	14	1	14	14	14	10	0	10	9	11	5	11	10	14	12	1	11	5	5	11	8	1	0	1	3	2	0	8	0	5	1	3	2	0	0	3	2	0	5	0	2	3	0	2
DNAJA2	O60884	DnaJ homolog subfamily A member 2 OS=Homo sapiens GN=DNAJA2 PE=1 SV=1	DnaJ homolog subfamily A member 2	13	13	13	1	13	13	13	11	0	11	12	12	7	12	11	13	13	5	12	7	4	8	7	2	1	1	3	3	0	7	1	6	1	7	2	3	1	4	5	2	3	1	3	4	0	2
DNAJB1	P25685	DnaJ homolog subfamily B member 1 OS=Homo sapiens GN=DNAJB1 PE=1 SV=4	DnaJ homolog subfamily B member 1	8;1	8;1	8;1	2	8	8	8	4	0	7	6	7	2	5	4	7	4	1	4	2	4	5	4	0	0	1	0	1	0	2	0	2	1	2	1	1	0	1	1	0	1	0	1	0	0	0
DNAJB11	Q9UBS4	DnaJ homolog subfamily B member 11 OS=Homo sapiens GN=DNAJB11 PE=1 SV=1	DnaJ homolog subfamily B member 11	5	5	5	1	5	5	5	2	0	5	5	5	0	5	5	5	5	0	2	2	1	2	2	0	0	0	1	0	0	2	0	0	0	0	0	0	1	0	2	0	1	0	2	0	0	0
DNAJB6	O75190	DnaJ homolog subfamily B member 6 OS=Homo sapiens GN=DNAJB6 PE=1 SV=2	DnaJ homolog subfamily B member 6	3;1	3;1	3;1	2	3	3	3	2	0	2	2	2	0	2	2	3	3	2	2	3	2	2	2	1	0	0	0	0	0	2	0	0	0	0	1	0	0	0	0	0	1	0	0	0	0	0
DNAJC13	O75165	DnaJ homolog subfamily C member 13 OS=Homo sapiens GN=DNAJC13 PE=1 SV=5	DnaJ homolog subfamily C member 13	15	15	15	1	15	15	15	8	0	10	10	12	2	11	9	12	12	1	9	4	7	6	3	0	1	0	0	1	0	2	1	2	0	1	1	0	0	1	3	0	2	1	1	0	0	0
DNAJC3	Q13217	DnaJ homolog subfamily C member 3 OS=Homo sapiens GN=DNAJC3 PE=1 SV=1	DnaJ homolog subfamily C member 3	3	3	3	1	3	3	3	1	0	1	1	1	1	1	1	3	2	1	1	0	0	0	0	1	0	0	1	1	0	0	1	0	0	0	0	0	0	0	0	0	0	0	1	1	0	1
DNAJC5	Q9H3Z4	DnaJ homolog subfamily C member 5 OS=Homo sapiens GN=DNAJC5 PE=1 SV=1	DnaJ homolog subfamily C member 5	2	2	2	1	2	2	2	1	0	1	1	1	1	1	1	1	1	0	1	0	1	1	0	1	0	0	0	0	0	1	0	1	0	0	0	0	0	0	0	0	1	0	1	2	0	1
DNAJC7	Q99615	DnaJ homolog subfamily C member 7 OS=Homo sapiens GN=DNAJC7 PE=1 SV=2	DnaJ homolog subfamily C member 7	6	6	6	1	6	6	6	3	0	5	3	4	1	4	2	6	5	0	6	0	2	4	4	0	0	0	0	1	0	0	0	2	1	2	0	0	0	1	2	0	0	0	1	2	0	1
DNAJC8	O75937	DnaJ homolog subfamily C member 8 OS=Homo sapiens GN=DNAJC8 PE=1 SV=2	DnaJ homolog subfamily C member 8	2	2	2	1	2	2	2	0	0	2	1	2	1	1	1	2	1	0	0	0	0	0	0	0	0	0	0	0	0	0	0	1	0	1	0	0	0	0	0	0	0	0	0	0	0	0
DNAJC9	Q8WXX5	DnaJ homolog subfamily C member 9 OS=Homo sapiens GN=DNAJC9 PE=1 SV=1	DnaJ homolog subfamily C member 9	2	2	2	1	2	2	2	0	0	2	2	2	0	0	0	0	1	0	0	0	0	0	0	0	0	0	0	0	0	0	0	0	0	0	0	0	0	0	0	0	0	0	0	0	0	0
DNASE1L1	P49184	Deoxyribonuclease-1-like 1 OS=Homo sapiens GN=DNASE1L1 PE=1 SV=1	Deoxyribonuclease-1-like 1	5	5	5	1	5	5	5	5	0	3	5	4	0	2	1	4	2	0	3	1	4	3	2	0	0	0	0	0	0	3	0	2	0	1	0	0	0	0	0	0	1	0	3	2	0	0
DNASE2	O00115	Deoxyribonuclease-2-alpha OS=Homo sapiens GN=DNASE2 PE=1 SV=2	Deoxyribonuclease-2-alpha	2	2	2	1	2	2	2	2	1	2	2	2	2	2	2	1	2	1	2	2	2	2	2	2	0	0	0	1	0	1	1	1	0	1	0	0	0	0	0	0	2	0	1	0	0	0
DNM1L	O00429	Dynamin-1-like protein OS=Homo sapiens GN=DNM1L PE=1 SV=2	Dynamin-1-like protein	6	6	6	1	6	6	6	5	0	5	6	6	0	6	3	6	6	1	4	2	3	4	3	1	0	0	1	1	0	3	0	1	0	0	0	0	0	0	1	0	1	0	1	1	0	0
DNM2	P50570	Dynamin-2 OS=Homo sapiens GN=DNM2 PE=1 SV=2;Dynamin-3 OS=Homo sapiens GN=DNM3 PE=1 SV=4	Dynamin-2;Dynamin-3	8;4;1	8;4;1	8;4;1	3	8	8	8	7	0	6	4	6	1	5	6	8	5	1	5	4	5	4	2	0	0	0	0	1	0	5	1	0	0	1	0	0	0	0	3	0	2	0	3	2	0	3
DOCK10	Q96BY6	Dedicator of cytokinesis protein 10 OS=Homo sapiens GN=DOCK10 PE=1 SV=3	Dedicator of cytokinesis protein 10	3	3	3	1	3	3	3	2	0	2	2	2	0	1	0	1	0	0	2	0	2	2	2	0	0	1	0	0	0	1	0	0	0	0	0	0	0	0	0	0	0	0	0	0	0	0
DOCK7	Q96N67	Dedicator of cytokinesis protein 7 OS=Homo sapiens GN=DOCK7 PE=1 SV=4	Dedicator of cytokinesis protein 7	3	3	2	1	3	3	2	2	0	3	3	2	0	1	0	3	2	0	2	0	2	2	0	0	0	0	0	0	0	0	0	2	0	1	0	0	0	0	0	0	0	0	1	0	0	0
DPP3	Q9NY33	Dipeptidyl peptidase 3 OS=Homo sapiens GN=DPP3 PE=1 SV=2	Dipeptidyl peptidase 3	12	12	12	1	12	12	12	7	1	11	11	11	4	9	6	9	5	1	5	3	6	6	4	3	1	1	1	0	1	4	4	6	2	3	0	1	0	1	4	1	2	0	4	3	0	4
DPP4	P27487	Dipeptidyl peptidase 4 OS=Homo sapiens GN=DPP4 PE=1 SV=2	Dipeptidyl peptidase 4;Dipeptidyl peptidase 4 membrane form;Dipeptidyl peptidase 4 soluble form	22	22	22	1	22	22	22	20	2	19	18	20	7	14	11	11	12	1	21	8	18	18	16	11	1	1	7	3	0	16	1	7	5	6	1	0	0	0	5	0	13	0	15	12	2	6
DPP7	Q9UHL4	Dipeptidyl peptidase 2 OS=Homo sapiens GN=DPP7 PE=1 SV=3	Dipeptidyl peptidase 2	2	2	2	1	2	2	2	1	0	1	2	2	0	2	2	2	2	1	1	1	2	2	2	2	1	0	0	1	0	2	1	0	0	1	0	0	0	0	1	0	2	0	1	1	0	1
DPYSL2	Q16555	Dihydropyrimidinase-related protein 2 OS=Homo sapiens GN=DPYSL2 PE=1 SV=1	Dihydropyrimidinase-related protein 2	18;2	18;2	15;1	2	18	18	15	16	0	13	15	14	3	13	13	16	11	3	17	12	11	11	9	5	1	1	7	1	0	8	0	9	1	8	2	0	0	2	7	1	8	0	9	8	0	5
DPYSL3	Q14195	Dihydropyrimidinase-related protein 3 OS=Homo sapiens GN=DPYSL3 PE=1 SV=1	Dihydropyrimidinase-related protein 3	9	6	6	1	9	6	6	7	0	7	7	8	2	8	6	6	8	0	9	4	8	8	5	2	0	0	2	0	0	2	0	2	0	4	0	0	0	0	3	0	4	0	3	3	0	2
DRG2	P55039	Developmentally-regulated GTP-binding protein 2 OS=Homo sapiens GN=DRG2 PE=1 SV=1	Developmentally-regulated GTP-binding protein 2	2	2	2	1	2	2	2	0	0	1	0	0	0	0	0	2	1	0	0	0	1	1	1	0	0	0	0	0	0	0	0	0	0	0	0	0	0	0	0	0	0	0	0	0	0	0
DSC1	Q08554	Desmocollin-1 OS=Homo sapiens GN=DSC1 PE=1 SV=2	Desmocollin-1	13	13	13	1	13	13	13	9	8	9	10	9	6	9	9	7	8	8	8	9	5	7	7	9	3	5	5	5	4	10	8	5	3	5	5	4	3	4	9	5	9	2	9	10	4	9
DSC3	Q14574	Desmocollin-3 OS=Homo sapiens GN=DSC3 PE=1 SV=3	Desmocollin-3	8	8	8	1	8	8	8	8	2	8	8	8	2	8	8	6	8	4	8	8	5	7	6	7	1	2	5	3	1	8	6	1	0	0	1	1	0	1	4	2	8	0	5	5	0	6
DSG1	Q02413	Desmoglein-1 OS=Homo sapiens GN=DSG1 PE=1 SV=2	Desmoglein-1	24	24	24	1	24	24	24	17	15	18	16	17	11	17	14	14	15	15	16	16	13	12	15	16	10	11	12	12	11	17	13	9	7	11	7	7	9	7	15	11	18	7	23	20	9	21
DSG2	Q14126	Desmoglein-2 OS=Homo sapiens GN=DSG2 PE=1 SV=2	Desmoglein-2	7	7	7	1	7	7	7	7	0	6	6	4	0	3	2	3	3	0	7	0	5	5	6	2	0	0	1	0	0	4	1	0	1	0	0	0	0	0	1	0	4	0	4	4	0	3
DSP	P15924	Desmoplakin OS=Homo sapiens GN=DSP PE=1 SV=3	Desmoplakin	110	110	110	1	110	110	110	95	74	87	80	87	67	92	91	74	86	91	93	85	76	80	82	90	35	42	62	65	39	98	73	67	30	64	35	25	29	28	67	39	95	19	85	84	31	83
DSTN	P60981	Destrin OS=Homo sapiens GN=DSTN PE=1 SV=3	Destrin	6	5	5	1	6	5	5	2	0	3	3	3	1	3	2	1	2	1	2	2	3	3	1	2	1	0	2	0	0	2	0	2	1	3	1	1	0	1	1	0	1	1	3	3	0	3
DTYMK	P23919	Thymidylate kinase OS=Homo sapiens GN=DTYMK PE=1 SV=4	Thymidylate kinase	3	3	3	1	3	3	3	2	0	3	3	2	0	1	2	3	3	0	2	1	2	2	1	1	0	0	1	0	0	1	0	2	0	1	0	0	0	0	1	0	0	0	1	0	0	0
DUSP3	P51452	Dual specificity protein phosphatase 3 OS=Homo sapiens GN=DUSP3 PE=1 SV=1	Dual specificity protein phosphatase 3	4	4	4	1	4	4	4	3	0	3	3	3	1	3	3	4	3	0	2	0	4	3	3	0	0	0	0	0	0	1	0	0	0	0	0	0	0	0	0	0	0	0	1	1	0	1
DUT	P33316	Deoxyuridine 5-triphosphate nucleotidohydrolase, mitochondrial OS=Homo sapiens GN=DUT PE=1 SV=4	Deoxyuridine 5-triphosphate nucleotidohydrolase, mitochondrial	3	3	3	1	3	3	3	2	0	3	3	3	0	3	1	1	2	0	0	0	3	0	0	0	0	0	0	0	0	0	0	0	0	0	0	0	0	0	0	0	0	0	0	0	0	0
DYNC1H1	Q14204	Cytoplasmic dynein 1 heavy chain 1 OS=Homo sapiens GN=DYNC1H1 PE=1 SV=5	Cytoplasmic dynein 1 heavy chain 1	135	135	135	1	135	135	135	87	3	98	92	95	29	80	76	124	103	10	74	40	65	62	45	12	1	3	75	14	1	47	3	47	16	30	14	9	3	23	48	2	30	0	43	29	0	29
DYNC1I2	Q13409	Cytoplasmic dynein 1 intermediate chain 2 OS=Homo sapiens GN=DYNC1I2 PE=1 SV=3	Cytoplasmic dynein 1 intermediate chain 2	8	8	8	1	8	8	8	3	1	7	5	7	5	7	6	7	5	2	4	4	2	1	3	2	0	0	2	1	0	3	0	5	2	5	1	0	0	2	2	0	2	0	4	4	0	4
DYNC1LI1	Q9Y6G9	Cytoplasmic dynein 1 light intermediate chain 1 OS=Homo sapiens GN=DYNC1LI1 PE=1 SV=3	Cytoplasmic dynein 1 light intermediate chain 1	10	10	9	1	10	10	9	5	1	7	8	8	4	8	7	10	9	1	3	1	2	3	1	0	0	0	3	1	0	0	0	3	0	2	0	0	0	0	3	0	1	0	0	0	0	0
DYNC1LI2	O43237	Cytoplasmic dynein 1 light intermediate chain 2 OS=Homo sapiens GN=DYNC1LI2 PE=1 SV=1	Cytoplasmic dynein 1 light intermediate chain 2	3	2	2	1	3	2	2	2	0	2	2	2	1	2	1	2	2	0	2	1	2	2	1	0	0	0	1	0	0	1	0	0	0	1	0	0	0	1	1	0	2	0	1	1	0	0
DYNC2H1	Q8NCM8	Cytoplasmic dynein 2 heavy chain 1 OS=Homo sapiens GN=DYNC2H1 PE=1 SV=4	Cytoplasmic dynein 2 heavy chain 1	2	2	2	1	2	2	2	1	0	2	1	2	1	1	1	0	1	1	1	1	2	2	2	2	0	0	1	0	0	1	1	1	0	1	0	0	0	0	1	1	1	0	1	1	0	1
DYNLL1	P63167	Dynein light chain 1, cytoplasmic OS=Homo sapiens GN=DYNLL1 PE=1 SV=1	Dynein light chain 1, cytoplasmic	3;1	3;1	3;1	2	3	3	3	3	0	2	2	3	2	3	3	3	3	0	3	2	1	2	1	0	0	0	1	1	0	1	0	1	0	0	0	0	0	0	0	0	1	0	0	0	0	0
DYNLRB1	Q9NP97	Dynein light chain roadblock-type 1 OS=Homo sapiens GN=DYNLRB1 PE=1 SV=3	Dynein light chain roadblock-type 1	5;2	5;2	5;2	2	5	5	5	5	0	4	5	5	3	5	4	3	5	3	5	4	5	5	3	3	2	0	2	0	0	5	3	3	2	3	2	1	2	2	3	0	4	0	3	4	1	4
DYNLT1	P63172	Dynein light chain Tctex-type 1 OS=Homo sapiens GN=DYNLT1 PE=1 SV=1	Dynein light chain Tctex-type 1	2	2	2	1	2	2	2	2	0	2	2	2	1	2	2	2	2	0	2	2	1	2	0	0	0	0	0	0	0	1	0	1	0	1	0	0	0	0	0	0	1	0	1	1	0	1
EBNA1BP2	Q99848	Probable rRNA-processing protein EBP2 OS=Homo sapiens GN=EBNA1BP2 PE=1 SV=2	Probable rRNA-processing protein EBP2	2	2	2	1	2	2	2	0	0	0	0	0	0	0	1	2	2	0	0	0	0	0	0	0	0	0	0	0	1	0	0	0	0	0	0	0	0	1	0	0	0	0	0	0	0	0
EBP	Q15125	3-beta-hydroxysteroid-Delta(8),Delta(7)-isomerase OS=Homo sapiens GN=EBP PE=1 SV=3	3-beta-hydroxysteroid-Delta(8),Delta(7)-isomerase	2	2	2	1	2	2	2	1	0	2	2	2	1	2	2	2	2	1	1	2	2	1	1	0	0	0	0	0	0	1	0	2	0	1	0	0	0	0	1	0	0	0	1	1	0	0
ECE1	P42892	Endothelin-converting enzyme 1 OS=Homo sapiens GN=ECE1 PE=1 SV=2	Endothelin-converting enzyme 1	7	7	7	1	7	7	7	7	0	4	4	6	4	2	1	3	2	0	7	0	6	6	5	3	0	0	2	0	0	4	0	3	0	1	0	0	0	0	0	0	5	0	4	4	0	4
ECM1	Q16610	Extracellular matrix protein 1 OS=Homo sapiens GN=ECM1 PE=1 SV=2	Extracellular matrix protein 1	5	5	5	1	5	5	5	5	1	5	5	5	1	5	3	4	5	3	4	4	3	3	3	3	1	1	0	1	1	4	2	1	1	0	1	0	0	1	2	1	4	0	1	1	0	2
EDIL3	O43854	EGF-like repeat and discoidin I-like domain-containing protein 3 OS=Homo sapiens GN=EDIL3 PE=1 SV=1	EGF-like repeat and discoidin I-like domain-containing protein 3	23	23	23	1	23	23	23	20	5	19	19	19	10	11	10	15	9	0	20	5	17	17	17	18	6	4	16	6	4	18	6	12	2	8	3	0	0	2	2	0	18	0	17	18	5	19
EEA1	Q15075	Early endosome antigen 1 OS=Homo sapiens GN=EEA1 PE=1 SV=2	Early endosome antigen 1	2	2	2	1	2	2	2	1	0	1	1	1	0	1	1	1	1	0	1	1	1	1	1	0	0	0	0	0	0	1	0	0	1	1	0	1	0	0	0	0	1	0	2	1	0	2
EEF1A1	P68104	Elongation factor 1-alpha 1 OS=Homo sapiens GN=EEF1A1 PE=1 SV=1;Putative elongation factor 1-alpha-like 3 OS=Homo sapiens GN=EEF1A1P5 PE=5 SV=1	Elongation factor 1-alpha 1;Putative elongation factor 1-alpha-like 3	22;21	22;21	10;10	2	22	22	10	19	9	17	18	18	10	17	15	20	19	12	19	15	16	15	13	15	7	9	13	11	4	16	11	16	12	15	12	11	8	15	15	8	16	8	16	14	11	15
EEF1A2	Q05639	Elongation factor 1-alpha 2 OS=Homo sapiens GN=EEF1A2 PE=1 SV=1	Elongation factor 1-alpha 2	14	2	2	1	14	2	2	11	6	12	13	13	6	13	12	13	13	8	12	11	10	10	10	10	5	7	8	8	3	10	7	10	7	9	8	7	7	10	9	5	9	5	9	7	6	8
EEF1B2	P24534	Elongation factor 1-beta OS=Homo sapiens GN=EEF1B2 PE=1 SV=3	Elongation factor 1-beta	6	6	6	1	6	6	6	3	0	4	4	4	2	4	4	4	4	1	3	4	2	4	3	1	0	0	0	0	0	3	1	2	0	1	0	1	0	0	2	0	1	1	3	3	0	2
EEF1D	P29692	Elongation factor 1-delta OS=Homo sapiens GN=EEF1D PE=1 SV=5	Elongation factor 1-delta	9	9	9	1	9	9	9	9	1	8	8	9	8	8	9	9	8	9	9	9	6	7	5	3	0	0	1	1	0	6	1	7	3	7	3	3	3	4	7	2	5	1	5	5	0	4
EEF1E1	O43324	Eukaryotic translation elongation factor 1 epsilon-1 OS=Homo sapiens GN=EEF1E1 PE=1 SV=1	Eukaryotic translation elongation factor 1 epsilon-1	5	5	5	1	5	5	5	2	0	4	3	4	3	5	5	5	5	3	3	4	2	1	1	1	0	0	2	0	0	1	1	3	1	1	1	0	0	2	1	0	1	0	1	1	0	0
EEF1G	P26641	Elongation factor 1-gamma OS=Homo sapiens GN=EEF1G PE=1 SV=3	Elongation factor 1-gamma	15	15	15	1	15	15	15	10	0	11	12	12	8	12	11	14	13	3	9	9	7	8	4	4	1	1	3	0	0	6	1	9	4	8	2	1	0	4	6	2	6	1	5	4	0	4
EEF2	P13639	Elongation factor 2 OS=Homo sapiens GN=EEF2 PE=1 SV=4	Elongation factor 2	42	42	41	1	42	42	41	36	7	37	38	34	21	34	33	38	36	19	35	27	29	31	24	21	3	5	13	9	1	31	12	23	15	19	9	2	5	12	22	3	28	4	21	21	3	18
EFEMP2	O95967	EGF-containing fibulin-like extracellular matrix protein 2 OS=Homo sapiens GN=EFEMP2 PE=1 SV=3	EGF-containing fibulin-like extracellular matrix protein 2	6	6	6	1	6	6	6	6	0	1	1	0	0	0	1	1	2	0	6	0	5	6	5	6	0	0	0	1	0	6	0	0	0	0	1	0	0	0	0	0	6	0	5	5	2	3
EFHD2	Q96C19	EF-hand domain-containing protein D2 OS=Homo sapiens GN=EFHD2 PE=1 SV=1;EF-hand domain-containing protein D1 OS=Homo sapiens GN=EFHD1 PE=1 SV=1	EF-hand domain-containing protein D2;EF-hand domain-containing protein D1	2;1	2;1	2;1	2	2	2	2	1	0	1	1	1	0	1	1	1	1	0	1	0	1	1	2	0	0	0	0	0	0	0	0	2	1	0	0	0	0	0	0	0	0	0	1	1	0	1
EFNB1	P98172	Ephrin-B1 OS=Homo sapiens GN=EFNB1 PE=1 SV=1	Ephrin-B1	3	3	3	1	3	3	3	3	0	1	0	2	0	0	0	1	1	0	3	0	3	3	3	0	0	0	2	0	0	3	0	0	0	0	0	0	0	0	0	0	1	0	2	2	0	1
EFR3A	Q14156	Protein EFR3 homolog A OS=Homo sapiens GN=EFR3A PE=1 SV=2	Protein EFR3 homolog A	4	4	4	1	4	4	4	4	0	2	3	2	0	1	0	1	1	0	4	1	3	4	4	1	0	0	0	0	0	2	0	0	0	0	0	0	0	0	0	0	0	0	0	0	0	0
EFTUD2	Q15029	116 kDa U5 small nuclear ribonucleoprotein component OS=Homo sapiens GN=EFTUD2 PE=1 SV=1	116 kDa U5 small nuclear ribonucleoprotein component	20	19	19	1	20	19	19	2	1	5	7	9	1	7	7	19	16	2	2	6	3	1	1	1	1	1	0	1	0	1	1	2	1	1	1	0	0	2	5	0	1	0	1	1	0	2
EGFR	P00533	Epidermal growth factor receptor OS=Homo sapiens GN=EGFR PE=1 SV=2	Epidermal growth factor receptor	20;1;1	20;1;1	20;1;1	3	20	20	20	18	0	8	11	12	1	5	3	12	4	0	17	1	16	17	15	3	1	0	5	0	1	16	0	3	2	4	0	1	0	0	2	0	9	0	13	12	0	7
EHD1	Q9H4M9	EH domain-containing protein 1 OS=Homo sapiens GN=EHD1 PE=1 SV=2	EH domain-containing protein 1	25	25	19	1	25	25	19	18	1	22	20	20	12	17	18	19	19	4	20	13	19	20	16	6	0	0	5	1	0	13	2	8	7	4	2	3	2	4	7	1	14	0	9	8	0	8
EHD2	Q9NZN4	EH domain-containing protein 2 OS=Homo sapiens GN=EHD2 PE=1 SV=2	EH domain-containing protein 2	17	15	15	1	17	15	15	11	0	12	11	11	5	10	7	12	12	0	12	1	12	11	10	5	0	0	2	1	0	9	0	5	0	3	0	0	0	0	3	0	8	0	8	10	0	3
EHD3	Q9NZN3	EH domain-containing protein 3 OS=Homo sapiens GN=EHD3 PE=1 SV=2	EH domain-containing protein 3	14	5	5	1	14	5	5	12	1	10	9	11	6	8	7	9	10	1	13	3	13	11	12	6	0	0	3	0	0	8	0	5	2	3	2	1	1	1	3	1	8	0	4	5	0	4
EHD4	Q9H223	EH domain-containing protein 4 OS=Homo sapiens GN=EHD4 PE=1 SV=1	EH domain-containing protein 4	23	21	18	1	23	21	18	14	1	19	16	18	9	16	15	18	18	4	16	8	16	14	13	5	0	0	4	0	0	14	1	9	7	9	5	0	0	2	7	0	5	0	10	10	0	6
EIF1AX	P47813	Eukaryotic translation initiation factor 1A, X-chromosomal OS=Homo sapiens GN=EIF1AX PE=1 SV=2;Eukaryotic translation initiation factor 1A, Y-chromosomal OS=Homo sapiens GN=EIF1AY PE=1 SV=4	Eukaryotic translation initiation factor 1A, X-chromosomal;Eukaryotic translation initiation factor 1A, Y-chromosomal	3;3	3;3	3;3	2	3	3	3	2	0	2	2	2	1	2	2	3	3	0	1	2	2	0	0	0	0	0	0	0	0	0	0	1	1	2	0	0	0	0	2	0	0	0	1	0	0	0
EIF2A	Q9BY44	Eukaryotic translation initiation factor 2A OS=Homo sapiens GN=EIF2A PE=1 SV=3	Eukaryotic translation initiation factor 2A;Eukaryotic translation initiation factor 2A, N-terminally processed	2	2	2	1	2	2	2	1	0	1	1	1	0	1	1	2	0	1	1	1	1	1	1	0	0	0	0	0	0	0	0	0	0	0	0	0	1	0	0	0	0	0	0	0	0	0
EIF2AK2	P19525	Interferon-induced, double-stranded RNA-activated protein kinase OS=Homo sapiens GN=EIF2AK2 PE=1 SV=2	Interferon-induced, double-stranded RNA-activated protein kinase	2	2	2	1	2	2	2	2	0	2	2	2	0	2	2	1	2	0	0	0	1	0	0	0	0	0	0	0	0	0	0	0	0	0	0	0	0	0	0	0	0	0	0	0	0	0
EIF2B3	Q9NR50	Translation initiation factor eIF-2B subunit gamma OS=Homo sapiens GN=EIF2B3 PE=1 SV=1	Translation initiation factor eIF-2B subunit gamma	6	6	6	1	6	6	6	4	0	3	5	2	0	2	2	6	5	0	1	1	3	2	0	0	0	0	0	0	0	0	1	0	0	0	1	0	0	1	2	0	0	0	0	0	0	0
EIF2S1	P05198	Eukaryotic translation initiation factor 2 subunit 1 OS=Homo sapiens GN=EIF2S1 PE=1 SV=3	Eukaryotic translation initiation factor 2 subunit 1	5	5	5	1	5	5	5	3	0	3	2	4	3	3	3	5	4	2	3	3	2	4	1	1	0	1	0	1	0	0	0	1	2	2	2	2	0	1	2	0	0	0	1	1	0	1
EIF2S2	P20042	Eukaryotic translation initiation factor 2 subunit 2 OS=Homo sapiens GN=EIF2S2 PE=1 SV=2	Eukaryotic translation initiation factor 2 subunit 2	3	3	3	1	3	3	3	2	0	2	2	2	0	2	1	3	2	0	2	0	1	1	0	0	0	0	0	0	0	1	0	0	0	0	0	0	0	1	0	1	0	0	1	0	0	0
EIF2S3L	Q2VIR3	Putative eukaryotic translation initiation factor 2 subunit 3-like protein OS=Homo sapiens GN=EIF2S3L PE=5 SV=2;Eukaryotic translation initiation factor 2 subunit 3 OS=Homo sapiens GN=EIF2S3 PE=1 SV=3	Putative eukaryotic translation initiation factor 2 subunit 3-like protein;Eukaryotic translation initiation factor 2 subunit 3	7;7	7;7	7;7	2	7	7	7	7	0	7	7	7	2	6	5	7	7	1	7	5	6	5	2	0	0	0	1	0	0	3	1	1	1	1	0	1	0	0	3	0	2	0	1	1	0	1
EIF3A	Q14152	Eukaryotic translation initiation factor 3 subunit A OS=Homo sapiens GN=EIF3A PE=1 SV=1	Eukaryotic translation initiation factor 3 subunit A	20	20	20	1	20	20	20	12	0	13	13	16	4	15	11	20	17	1	8	8	10	8	3	0	1	0	1	0	0	4	0	6	1	5	0	1	0	2	7	0	4	0	3	2	0	2
EIF3B	P55884	Eukaryotic translation initiation factor 3 subunit B OS=Homo sapiens GN=EIF3B PE=1 SV=3	Eukaryotic translation initiation factor 3 subunit B	14	14	14	1	14	14	14	10	0	10	7	9	2	9	10	14	13	2	9	5	10	6	4	1	0	0	0	0	0	3	1	4	0	3	0	0	0	1	3	0	2	0	2	2	0	0
EIF3C	Q99613	Eukaryotic translation initiation factor 3 subunit C OS=Homo sapiens GN=EIF3C PE=1 SV=1;Eukaryotic translation initiation factor 3 subunit C-like protein OS=Homo sapiens GN=EIF3CL PE=3 SV=1	Eukaryotic translation initiation factor 3 subunit C;Eukaryotic translation initiation factor 3 subunit C-like protein	11;11	11;11	11;11	2	11	11	11	7	0	10	9	10	4	10	8	11	10	0	3	7	4	7	2	0	0	0	2	0	0	1	0	4	0	3	1	2	0	1	2	0	1	0	1	0	0	0
EIF3D	O15371	Eukaryotic translation initiation factor 3 subunit D OS=Homo sapiens GN=EIF3D PE=1 SV=1	Eukaryotic translation initiation factor 3 subunit D	11	11	11	1	11	11	11	6	0	10	10	8	2	8	8	11	8	0	6	6	3	3	2	0	0	0	0	0	0	1	0	5	1	2	0	0	0	0	2	0	0	0	2	0	0	0
EIF3E	P60228	Eukaryotic translation initiation factor 3 subunit E OS=Homo sapiens GN=EIF3E PE=1 SV=1	Eukaryotic translation initiation factor 3 subunit E	12	12	12	1	12	12	12	6	0	9	10	10	2	9	7	11	11	1	6	6	7	6	3	0	0	0	0	0	0	2	0	3	0	4	0	1	0	1	1	0	1	0	0	0	0	0
EIF3F	O00303	Eukaryotic translation initiation factor 3 subunit F OS=Homo sapiens GN=EIF3F PE=1 SV=1	Eukaryotic translation initiation factor 3 subunit F	10	10	10	1	10	10	10	8	0	8	6	6	3	7	7	9	9	6	7	7	7	7	7	2	0	0	0	0	0	7	0	2	2	1	0	0	0	2	6	0	5	0	1	1	0	0
EIF3H	O15372	Eukaryotic translation initiation factor 3 subunit H OS=Homo sapiens GN=EIF3H PE=1 SV=1	Eukaryotic translation initiation factor 3 subunit H	6	6	6	1	6	6	6	3	0	4	4	4	1	4	5	5	3	1	3	3	2	2	1	0	0	0	0	0	0	1	1	1	1	1	1	0	0	1	2	1	1	0	3	1	0	0
EIF3I	Q13347	Eukaryotic translation initiation factor 3 subunit I OS=Homo sapiens GN=EIF3I PE=1 SV=1	Eukaryotic translation initiation factor 3 subunit I	9	9	9	1	9	9	9	6	0	9	7	8	5	6	5	9	9	5	5	5	6	6	4	0	0	0	3	1	0	4	0	4	1	4	1	0	1	3	6	0	1	0	4	3	0	0
EIF3K	Q9UBQ5	Eukaryotic translation initiation factor 3 subunit K OS=Homo sapiens GN=EIF3K PE=1 SV=1	Eukaryotic translation initiation factor 3 subunit K	3	3	3	1	3	3	3	3	0	3	3	3	2	3	3	3	3	2	2	2	2	2	2	0	0	0	1	0	0	2	0	1	1	0	1	1	1	1	2	0	1	0	2	2	0	1
EIF3L	Q9Y262	Eukaryotic translation initiation factor 3 subunit L OS=Homo sapiens GN=EIF3L PE=1 SV=1	Eukaryotic translation initiation factor 3 subunit L	15	15	15	1	15	15	15	9	0	12	13	11	5	12	12	15	13	3	9	11	8	10	2	2	1	0	1	0	0	4	1	6	1	5	1	0	0	1	8	0	3	0	3	2	0	1
EIF3M	Q7L2H7	Eukaryotic translation initiation factor 3 subunit M OS=Homo sapiens GN=EIF3M PE=1 SV=1	Eukaryotic translation initiation factor 3 subunit M	3	3	3	1	3	3	3	3	0	3	2	2	3	2	1	3	3	3	3	3	3	3	3	2	0	0	2	1	0	3	0	3	1	2	1	1	0	1	2	1	1	0	1	0	0	0
EIF4A1	P60842	Eukaryotic initiation factor 4A-I OS=Homo sapiens GN=EIF4A1 PE=1 SV=1	Eukaryotic initiation factor 4A-I	22	22	13	1	22	22	13	21	3	20	20	21	14	20	19	22	20	3	17	14	14	13	10	4	3	3	8	3	1	13	4	12	5	12	6	2	2	4	7	1	9	2	11	7	1	6
EIF4A2	Q14240	Eukaryotic initiation factor 4A-II OS=Homo sapiens GN=EIF4A2 PE=1 SV=2	Eukaryotic initiation factor 4A-II;Eukaryotic initiation factor 4A-II, N-terminally processed	11	2	2	1	11	2	2	9	3	11	11	11	7	11	11	11	10	3	9	9	8	8	5	2	3	3	5	2	1	8	3	8	5	6	6	2	2	4	6	1	5	2	6	2	1	4
EIF4A3	P38919	Eukaryotic initiation factor 4A-III OS=Homo sapiens GN=EIF4A3 PE=1 SV=4	Eukaryotic initiation factor 4A-III;Eukaryotic initiation factor 4A-III, N-terminally processed	9	7	7	1	9	7	7	6	1	9	8	7	4	6	5	9	8	1	3	4	2	3	1	1	1	0	2	1	0	3	0	5	0	3	1	0	1	1	2	0	3	1	1	1	0	1
EIF4E	P06730	Eukaryotic translation initiation factor 4E OS=Homo sapiens GN=EIF4E PE=1 SV=2	Eukaryotic translation initiation factor 4E	2	2	2	1	2	2	2	2	0	2	2	2	1	2	2	2	2	0	2	2	2	2	0	0	0	0	1	0	0	0	0	2	0	1	0	0	0	0	1	0	0	0	1	0	0	0
EIF4G1	Q04637	Eukaryotic translation initiation factor 4 gamma 1 OS=Homo sapiens GN=EIF4G1 PE=1 SV=4	Eukaryotic translation initiation factor 4 gamma 1	7;1	7;1	7;1	2	7	7	7	2	1	4	4	5	2	3	2	6	4	1	2	2	2	2	2	0	0	0	1	1	0	1	1	4	0	2	0	0	0	1	0	0	1	0	0	0	0	0
EIF4G2	P78344	Eukaryotic translation initiation factor 4 gamma 2 OS=Homo sapiens GN=EIF4G2 PE=1 SV=1	Eukaryotic translation initiation factor 4 gamma 2	3	3	3	1	3	3	3	1	0	1	1	1	0	0	0	3	1	0	1	0	1	1	1	0	0	0	0	0	0	0	0	0	0	0	1	0	0	0	0	0	0	0	0	0	0	0
EIF4H	Q15056	Eukaryotic translation initiation factor 4H OS=Homo sapiens GN=EIF4H PE=1 SV=5	Eukaryotic translation initiation factor 4H	2	2	2	1	2	2	2	1	0	2	2	0	1	1	2	2	2	0	1	1	0	1	0	0	0	0	0	0	0	2	0	1	0	1	0	0	0	0	0	0	1	0	0	0	0	0
EIF5A	P63241	Eukaryotic translation initiation factor 5A-1 OS=Homo sapiens GN=EIF5A PE=1 SV=2;Eukaryotic translation initiation factor 5A-2 OS=Homo sapiens GN=EIF5A2 PE=1 SV=3;Eukaryotic translation initiation factor 5A-1-like OS=Homo sapiens GN=EIF5AL1 PE=1 SV=2	Eukaryotic translation initiation factor 5A-1;Eukaryotic translation initiation factor 5A-2;Eukaryotic translation initiation factor 5A-1-like	7;4;4	7;4;4	7;4;4	3	7	7	7	5	0	5	6	4	1	6	6	6	6	0	6	2	5	6	1	1	0	0	1	0	0	5	0	2	0	1	0	0	0	0	3	0	3	0	5	5	0	4
EIF5B	O60841	Eukaryotic translation initiation factor 5B OS=Homo sapiens GN=EIF5B PE=1 SV=4	Eukaryotic translation initiation factor 5B	4	4	4	1	4	4	4	1	0	2	1	2	0	2	1	2	2	0	0	0	2	2	1	0	0	0	1	0	0	0	0	1	0	0	0	0	0	0	0	0	0	0	0	0	0	0
EIF6	P56537	Eukaryotic translation initiation factor 6 OS=Homo sapiens GN=EIF6 PE=1 SV=1	Eukaryotic translation initiation factor 6	3	3	3	1	3	3	3	3	2	2	3	2	1	1	3	3	3	2	2	2	1	2	1	2	0	1	0	1	1	1	2	2	1	1	0	0	0	1	2	1	3	0	2	2	1	2
ELAVL1	Q15717	ELAV-like protein 1 OS=Homo sapiens GN=ELAVL1 PE=1 SV=2	ELAV-like protein 1	7	7	7	1	7	7	7	1	0	5	5	4	2	5	4	6	3	0	0	4	1	2	1	0	0	0	0	0	0	0	0	2	2	1	0	0	0	0	2	1	0	0	1	1	0	1
ELP3	Q9H9T3	Elongator complex protein 3 OS=Homo sapiens GN=ELP3 PE=1 SV=2	Elongator complex protein 3	2	2	2	1	2	2	2	0	0	0	0	0	0	0	0	2	2	0	0	0	0	0	0	0	0	0	0	0	0	0	0	0	0	0	0	0	0	0	1	0	0	0	0	0	0	0
EMC1	Q8N766	ER membrane protein complex subunit 1 OS=Homo sapiens GN=EMC1 PE=1 SV=1	ER membrane protein complex subunit 1	3	3	3	1	3	3	3	2	0	2	2	2	0	2	2	3	2	0	1	1	0	1	0	0	0	0	0	0	0	0	0	0	0	0	0	0	0	0	0	0	0	0	1	1	0	1
EMC2	Q15006	ER membrane protein complex subunit 2 OS=Homo sapiens GN=EMC2 PE=1 SV=1	ER membrane protein complex subunit 2	4	4	4	1	4	4	4	4	0	3	3	4	1	4	3	3	3	1	2	2	2	3	2	0	0	0	0	0	1	2	0	2	0	1	0	0	0	2	1	0	2	0	1	1	0	0
EMILIN1	Q9Y6C2	EMILIN-1 OS=Homo sapiens GN=EMILIN1 PE=1 SV=2	EMILIN-1	24	24	24	1	24	24	24	6	0	2	0	0	0	2	2	16	8	0	4	0	4	6	7	3	0	2	20	13	1	15	0	1	1	0	3	1	0	1	3	0	6	0	2	3	0	6
EML4	Q9HC35	Echinoderm microtubule-associated protein-like 4 OS=Homo sapiens GN=EML4 PE=1 SV=3	Echinoderm microtubule-associated protein-like 4	2	2	2	1	2	2	2	1	0	1	1	1	1	1	1	1	1	0	1	1	0	0	0	0	0	0	1	0	0	1	1	1	0	0	0	0	0	0	0	0	1	0	0	0	0	0
ENDOD1	O94919	Endonuclease domain-containing 1 protein OS=Homo sapiens GN=ENDOD1 PE=1 SV=2	Endonuclease domain-containing 1 protein	2	2	2	1	2	2	2	2	0	2	2	2	0	1	2	2	2	1	1	1	2	1	2	2	0	0	0	0	0	2	0	1	0	0	0	0	0	0	1	0	1	0	2	2	0	1
ENG	P17813	Endoglin OS=Homo sapiens GN=ENG PE=1 SV=2	Endoglin	10	10	10	1	10	10	10	9	0	9	9	9	3	8	7	7	8	0	9	3	9	9	8	3	0	0	4	0	0	6	0	7	3	4	0	0	0	0	7	0	7	0	9	8	1	5
ENO1	P06733	Alpha-enolase OS=Homo sapiens GN=ENO1 PE=1 SV=2	Alpha-enolase	34	34	31	1	34	34	31	29	9	32	32	32	22	30	28	29	27	18	29	23	26	28	24	21	7	8	13	6	5	28	13	24	20	22	17	14	8	11	19	4	28	7	25	25	5	23
ENO2	P09104	Gamma-enolase OS=Homo sapiens GN=ENO2 PE=1 SV=3	Gamma-enolase	17	14	14	1	17	14	14	11	1	17	17	17	11	15	15	16	17	4	10	9	11	10	5	4	1	0	1	1	1	6	2	10	7	9	3	5	4	3	9	2	5	3	9	7	2	6
ENOPH1	Q9UHY7	Enolase-phosphatase E1 OS=Homo sapiens GN=ENOPH1 PE=1 SV=1	Enolase-phosphatase E1	2	2	2	1	2	2	2	1	0	1	2	1	1	1	0	1	0	0	1	0	2	1	0	0	0	0	0	0	0	1	0	1	0	0	0	0	0	0	1	0	0	0	1	1	0	0
ENPP1	P22413	Ectonucleotide pyrophosphatase/phosphodiesterase family member 1 OS=Homo sapiens GN=ENPP1 PE=1 SV=2	Ectonucleotide pyrophosphatase/phosphodiesterase family member 1;Alkaline phosphodiesterase I;Nucleotide pyrophosphatase	6	6	6	1	6	6	6	4	0	5	5	5	1	4	2	2	4	0	4	0	4	4	1	1	0	0	0	0	0	3	0	1	0	0	0	0	0	0	1	0	2	0	4	4	0	1
EPB41L2	O43491	Band 4.1-like protein 2 OS=Homo sapiens GN=EPB41L2 PE=1 SV=1	Band 4.1-like protein 2	16;1	16;1	14;0	2	16	16	14	16	0	11	11	10	3	6	4	10	5	0	14	2	14	15	12	4	0	1	5	0	0	12	0	3	1	4	1	0	0	1	3	0	10	0	8	8	0	8
EPB41L3	Q9Y2J2	Band 4.1-like protein 3 OS=Homo sapiens GN=EPB41L3 PE=1 SV=2	Band 4.1-like protein 3;Band 4.1-like protein 3, N-terminally processed	9	7	7	1	9	7	7	8	1	6	7	6	2	3	4	3	4	1	7	2	9	9	7	3	0	0	2	1	0	5	1	1	0	1	0	0	0	0	1	0	2	0	6	3	0	4
EPHA2	P29317	Ephrin type-A receptor 2 OS=Homo sapiens GN=EPHA2 PE=1 SV=2	Ephrin type-A receptor 2	13	11	11	1	13	11	11	13	1	4	7	8	1	6	4	8	4	1	13	1	12	12	11	2	0	0	6	0	1	12	1	2	0	2	1	0	0	1	2	2	7	0	5	5	0	3
EPHB2	P29323	Ephrin type-B receptor 2 OS=Homo sapiens GN=EPHB2 PE=1 SV=5	Ephrin type-B receptor 2	18;3;3;2;1;1;1;1;1	18;3;3;2;1;1;1;1;1	16;1;1;0;0;0;0;0;0	9	18	18	16	18	0	8	11	12	1	7	4	8	5	0	18	0	16	17	17	2	0	0	3	0	0	15	0	2	0	1	0	1	0	0	1	0	12	0	14	13	0	8
EPHB4	P54760	Ephrin type-B receptor 4 OS=Homo sapiens GN=EPHB4 PE=1 SV=2;Ephrin type-B receptor 3 OS=Homo sapiens GN=EPHB3 PE=1 SV=2	Ephrin type-B receptor 4;Ephrin type-B receptor 3	4;3	2;1	2;1	2	4	2	2	4	0	0	1	3	0	1	1	3	1	0	4	0	4	4	4	0	0	0	1	0	0	3	0	0	0	0	0	0	0	0	1	0	2	0	1	1	0	0
EPHX1	P07099	Epoxide hydrolase 1 OS=Homo sapiens GN=EPHX1 PE=1 SV=1	Epoxide hydrolase 1	3	3	3	1	3	3	3	3	0	3	3	3	1	3	2	2	3	0	3	0	2	2	2	0	0	0	0	0	0	2	0	1	0	0	0	1	0	0	0	0	1	0	0	0	0	1
EPPK1	P58107	Epiplakin OS=Homo sapiens GN=EPPK1 PE=1 SV=2	Epiplakin	14	10	10	1	14	10	10	12	3	8	5	6	2	11	7	10	12	3	7	6	4	6	7	6	0	4	1	0	1	5	2	0	0	1	1	0	0	1	2	1	8	0	2	2	1	2
EPRS	P07814	Bifunctional glutamate/proline--tRNA ligase OS=Homo sapiens GN=EPRS PE=1 SV=5	Bifunctional glutamate/proline--tRNA ligase;Glutamate--tRNA ligase;Proline--tRNA ligase	25	25	25	1	25	25	25	12	0	18	13	13	3	15	17	24	18	4	8	7	7	8	2	0	0	0	3	2	0	3	0	5	1	2	0	0	0	4	4	0	2	1	2	2	0	1
ERBB2IP	Q96RT1	Protein LAP2 OS=Homo sapiens GN=ERBB2IP PE=1 SV=2	Protein LAP2	4	4	4	1	4	4	4	3	0	0	0	1	0	0	0	1	0	0	3	0	3	3	3	0	0	0	0	0	0	2	0	0	0	0	0	0	1	0	1	0	2	1	0	0	0	0
ERGIC1	Q969X5	Endoplasmic reticulum-Golgi intermediate compartment protein 1 OS=Homo sapiens GN=ERGIC1 PE=1 SV=1	Endoplasmic reticulum-Golgi intermediate compartment protein 1	2	2	2	1	2	2	2	2	0	2	2	2	1	2	2	2	2	0	1	1	1	1	0	0	0	0	0	0	0	0	0	0	0	1	0	0	0	0	1	0	0	0	0	0	0	0
ERH	P84090	Enhancer of rudimentary homolog OS=Homo sapiens GN=ERH PE=1 SV=1	Enhancer of rudimentary homolog	2	2	2	1	2	2	2	2	0	2	2	2	1	2	2	2	2	0	1	0	0	0	1	0	0	0	0	0	0	1	0	1	0	0	0	0	0	0	1	0	1	0	1	1	0	1
ERLIN2	O94905	Erlin-2 OS=Homo sapiens GN=ERLIN2 PE=1 SV=1	Erlin-2	4	4	2	1	4	4	2	4	0	3	3	3	3	3	3	4	4	1	3	1	3	3	3	3	0	0	1	0	0	4	2	2	0	2	0	0	0	0	3	0	3	0	3	3	0	2
ERO1L	Q96HE7	ERO1-like protein alpha OS=Homo sapiens GN=ERO1L PE=1 SV=2	ERO1-like protein alpha	5;1	5;1	5;1	2	5	5	5	0	0	2	2	2	1	3	4	5	4	0	1	0	1	2	1	0	0	0	0	0	0	1	0	2	1	1	0	0	0	1	0	0	0	0	0	0	0	0
ERP29	P30040	Endoplasmic reticulum resident protein 29 OS=Homo sapiens GN=ERP29 PE=1 SV=4	Endoplasmic reticulum resident protein 29	7	7	7	1	7	7	7	5	0	7	5	7	4	7	7	7	7	3	6	4	5	5	4	3	1	0	2	0	0	4	2	4	3	3	1	1	2	3	5	0	4	0	4	4	0	2
ERP44	Q9BS26	Endoplasmic reticulum resident protein 44 OS=Homo sapiens GN=ERP44 PE=1 SV=1	Endoplasmic reticulum resident protein 44	7	7	7	1	7	7	7	2	0	6	6	6	2	5	6	6	6	2	3	3	2	3	2	2	0	0	1	1	0	2	2	3	0	2	0	1	0	1	4	0	2	0	2	2	0	2
ESD	P10768	S-formylglutathione hydrolase OS=Homo sapiens GN=ESD PE=1 SV=2	S-formylglutathione hydrolase	5	5	5	1	5	5	5	4	0	4	3	4	1	3	4	5	1	0	2	2	3	3	1	0	0	0	1	0	0	2	0	2	0	1	0	1	0	0	2	0	2	0	2	3	1	3
ESYT1	Q9BSJ8	Extended synaptotagmin-1 OS=Homo sapiens GN=ESYT1 PE=1 SV=1	Extended synaptotagmin-1	13	13	13	1	13	13	13	11	0	12	12	11	5	12	9	10	11	0	12	4	10	7	10	3	0	1	0	0	0	5	0	5	3	4	0	0	1	2	3	0	5	1	8	6	0	6
ETF1	P62495	Eukaryotic peptide chain release factor subunit 1 OS=Homo sapiens GN=ETF1 PE=1 SV=3	Eukaryotic peptide chain release factor subunit 1	6	6	6	1	6	6	6	4	0	3	4	2	2	4	3	4	3	1	2	3	4	4	2	2	0	0	1	0	0	2	0	2	0	2	2	0	1	0	2	0	0	0	1	0	0	0
ETFA	P13804	Electron transfer flavoprotein subunit alpha, mitochondrial OS=Homo sapiens GN=ETFA PE=1 SV=1	Electron transfer flavoprotein subunit alpha, mitochondrial	2	2	2	1	2	2	2	2	0	2	1	2	0	1	2	2	2	0	2	0	1	1	1	0	0	0	0	0	0	1	0	0	1	0	0	0	0	0	2	0	0	0	2	1	0	2
ETFB	P38117	Electron transfer flavoprotein subunit beta OS=Homo sapiens GN=ETFB PE=1 SV=3	Electron transfer flavoprotein subunit beta	2	2	2	1	2	2	2	2	0	2	1	2	0	2	2	2	2	0	1	0	0	2	1	0	0	0	1	0	0	0	0	0	0	1	0	0	0	0	0	0	1	0	2	1	0	0
EVA1A	Q9H8M9	Protein eva-1 homolog A OS=Homo sapiens GN=EVA1A PE=2 SV=1	Protein eva-1 homolog A	2	2	2	1	2	2	2	1	0	1	0	2	0	0	0	0	1	0	2	0	1	1	1	0	0	0	1	0	0	2	0	0	0	0	0	0	0	0	0	0	2	0	1	1	0	1
EVA1B	Q9NVM1	Protein eva-1 homolog B OS=Homo sapiens GN=EVA1B PE=1 SV=1	Protein eva-1 homolog B	4	4	4	1	4	4	4	3	0	1	1	3	1	3	2	3	2	0	4	0	2	2	2	1	0	0	1	0	0	2	0	0	0	1	0	0	0	0	0	0	2	0	2	2	0	2
EVPL	Q92817	Envoplakin OS=Homo sapiens GN=EVPL PE=1 SV=3	Envoplakin	2	2	2	1	2	2	2	1	0	1	1	1	0	1	0	0	1	1	1	1	1	1	1	1	0	0	0	0	0	0	1	0	0	0	0	0	0	0	1	0	0	1	0	0	0	0
EXOC1	Q9NV70	Exocyst complex component 1 OS=Homo sapiens GN=EXOC1 PE=1 SV=4	Exocyst complex component 1	5	5	5	1	5	5	5	2	0	2	3	3	0	3	1	2	2	0	2	0	1	1	1	0	0	0	0	0	0	1	0	1	1	1	0	0	0	0	1	0	0	0	1	0	0	0
EXOC2	Q96KP1	Exocyst complex component 2 OS=Homo sapiens GN=EXOC2 PE=1 SV=1	Exocyst complex component 2	3	3	3	1	3	3	3	2	0	2	2	2	0	1	1	1	1	0	3	0	1	1	0	0	0	0	0	0	0	2	0	0	0	0	0	0	0	0	1	0	1	0	0	0	0	0
EXOC3	O60645	Exocyst complex component 3 OS=Homo sapiens GN=EXOC3 PE=1 SV=2	Exocyst complex component 3	5	5	5	1	5	5	5	4	0	4	4	4	0	4	2	4	4	0	3	1	3	3	2	0	0	0	0	0	0	2	0	0	1	0	1	0	0	0	1	0	1	0	0	0	0	0
EXOC4	Q96A65	Exocyst complex component 4 OS=Homo sapiens GN=EXOC4 PE=1 SV=1	Exocyst complex component 4	6	6	6	1	6	6	6	3	0	3	4	4	1	2	2	3	3	0	4	0	3	4	3	0	0	0	2	0	0	0	0	3	2	3	0	0	0	0	1	0	0	0	2	1	0	0
EXOC5	O00471	Exocyst complex component 5 OS=Homo sapiens GN=EXOC5 PE=1 SV=1	Exocyst complex component 5	6	6	6	1	6	6	6	2	1	3	3	3	2	3	2	2	3	1	3	1	2	2	2	0	0	0	2	3	0	3	1	0	1	1	0	1	1	0	1	1	2	0	1	1	0	1
EXOC6B	Q9Y2D4	Exocyst complex component 6B OS=Homo sapiens GN=EXOC6B PE=1 SV=3	Exocyst complex component 6B	2	2	2	1	2	2	2	0	0	0	0	0	0	0	0	0	0	0	0	0	0	0	0	0	0	0	0	0	0	0	0	0	0	0	0	0	1	0	0	0	0	0	0	0	0	0
EXOC7	Q9UPT5	Exocyst complex component 7 OS=Homo sapiens GN=EXOC7 PE=1 SV=3	Exocyst complex component 7	8	8	8	1	8	8	8	3	0	5	4	7	3	7	4	6	6	0	2	1	7	7	4	2	1	0	1	0	0	1	0	3	1	1	1	0	0	0	2	0	1	0	3	2	0	2
EXOC8	Q8IYI6	Exocyst complex component 8 OS=Homo sapiens GN=EXOC8 PE=1 SV=2	Exocyst complex component 8	6	6	6	1	6	6	6	2	0	3	3	3	3	4	1	4	2	0	2	1	2	2	1	0	0	0	0	0	1	1	0	3	0	4	1	1	1	1	2	0	0	0	2	1	1	1
EZR	P15311	Ezrin OS=Homo sapiens GN=EZR PE=1 SV=4	Ezrin	40	28	26	1	40	28	26	33	8	38	36	37	24	33	31	27	29	11	31	22	28	28	21	19	3	2	8	3	3	24	8	30	15	25	10	8	3	8	11	3	23	3	22	21	3	15
F10	P00742	Coagulation factor X OS=Homo sapiens GN=F10 PE=1 SV=2	Coagulation factor X;Factor X light chain;Factor X heavy chain;Activated factor Xa heavy chain	2	2	2	1	2	2	2	2	1	2	2	2	1	1	2	2	2	1	2	2	2	2	2	1	0	0	2	1	0	2	0	0	0	0	0	0	0	0	2	0	0	0	2	2	0	2
F11R	Q9Y624	Junctional adhesion molecule A OS=Homo sapiens GN=F11R PE=1 SV=1	Junctional adhesion molecule A	2	2	2	1	2	2	2	0	0	2	2	2	1	2	2	2	2	0	0	1	0	1	0	0	0	0	0	0	0	0	0	1	1	1	0	0	0	0	1	0	0	0	1	1	0	1
F13A1	P00488	Coagulation factor XIII A chain OS=Homo sapiens GN=F13A1 PE=1 SV=4	Coagulation factor XIII A chain	3	3	3	1	3	3	3	1	0	1	1	2	1	2	1	2	3	1	2	1	2	2	2	1	0	0	1	1	0	0	0	0	0	0	0	0	0	0	2	0	1	0	1	1	0	1
F3	P13726	Tissue factor OS=Homo sapiens GN=F3 PE=1 SV=1	Tissue factor	3	3	3	1	3	3	3	3	0	2	2	2	0	1	0	1	1	0	2	0	2	2	2	0	0	0	0	0	0	2	0	0	0	0	0	0	0	0	0	0	1	0	2	2	0	2
FABP3	P05413	Fatty acid-binding protein, heart OS=Homo sapiens GN=FABP3 PE=1 SV=4	Fatty acid-binding protein, heart	10;1	10;1	10;1	2	10	10	10	7	5	9	8	8	4	7	7	6	6	4	7	7	5	6	5	5	0	1	5	4	0	4	4	7	5	4	2	0	1	0	6	0	4	0	7	6	1	5
FABP5	Q01469	Fatty acid-binding protein, epidermal OS=Homo sapiens GN=FABP5 PE=1 SV=3	Fatty acid-binding protein, epidermal	9;1	9;1	9;1	2	9	9	9	5	4	8	6	8	3	8	4	2	5	4	4	5	4	4	4	4	3	5	5	5	3	7	5	5	3	5	5	4	2	1	6	4	5	1	5	4	2	4
FAM126A	Q9BYI3	Hyccin OS=Homo sapiens GN=FAM126A PE=1 SV=2	Hyccin	3	3	3	1	3	3	3	2	0	2	2	2	0	1	0	1	1	0	2	0	3	2	1	0	0	0	0	0	0	1	0	0	0	0	0	0	0	0	0	0	1	0	0	0	0	0
FAM129A	Q9BZQ8	Protein Niban OS=Homo sapiens GN=FAM129A PE=1 SV=1	Protein Niban	10	10	10	1	10	10	10	9	0	9	9	9	1	6	2	6	4	0	9	0	7	7	5	1	0	0	1	0	0	4	0	3	1	3	2	0	0	0	2	0	2	0	3	2	1	2
FAM129B	Q96TA1	Niban-like protein 1 OS=Homo sapiens GN=FAM129B PE=1 SV=3	Niban-like protein 1	17	17	17	1	17	17	17	15	0	14	13	12	6	12	9	9	10	1	14	4	14	12	11	4	1	0	2	2	0	14	1	6	3	7	3	0	0	2	2	0	12	0	9	10	0	5
FAM171A1	Q5VUB5	Protein FAM171A1 OS=Homo sapiens GN=FAM171A1 PE=1 SV=1	Protein FAM171A1	2	2	2	1	2	2	2	2	0	0	0	0	0	0	0	0	0	0	2	0	2	2	1	0	0	0	0	0	0	0	0	0	0	0	0	0	0	0	0	0	0	0	1	0	0	1
FAM213A	Q9BRX8	Redox-regulatory protein FAM213A OS=Homo sapiens GN=FAM213A PE=1 SV=3	Redox-regulatory protein FAM213A	2	2	2	1	2	2	2	0	0	0	1	1	0	1	2	2	1	1	0	1	1	0	1	0	0	0	0	0	0	1	0	0	0	0	0	0	0	0	0	0	1	0	0	0	0	0
FAM21B	Q5SNT6	WASH complex subunit FAM21B OS=Homo sapiens GN=FAM21B PE=2 SV=2;WASH complex subunit FAM21C OS=Homo sapiens GN=FAM21C PE=1 SV=3;WASH complex subunit FAM21A OS=Homo sapiens GN=FAM21A PE=2 SV=3	WASH complex subunit FAM21B;WASH complex subunit FAM21C;WASH complex subunit FAM21A	2;2;2	2;2;2	2;2;2	3	2	2	2	1	0	2	2	2	0	2	1	2	1	0	1	0	0	1	0	0	0	0	0	0	0	0	0	0	0	0	0	0	0	0	0	0	1	0	0	0	0	0
FAM3C	Q92520	Protein FAM3C OS=Homo sapiens GN=FAM3C PE=1 SV=1	Protein FAM3C	3	3	3	1	3	3	3	1	0	2	2	2	1	2	2	2	2	1	1	2	1	1	1	0	0	0	0	0	0	1	0	1	1	1	1	0	0	0	1	0	1	0	0	0	0	0
FAM49B	Q9NUQ9	Protein FAM49B OS=Homo sapiens GN=FAM49B PE=1 SV=1	Protein FAM49B	5;1	5;1	5;1	2	5	5	5	2	0	3	2	3	1	3	2	4	0	0	5	0	2	4	4	0	0	0	0	0	0	3	0	1	1	1	1	0	0	0	0	0	0	0	2	2	0	1
FAM98B	Q52LJ0	Protein FAM98B OS=Homo sapiens GN=FAM98B PE=1 SV=1	Protein FAM98B	3	3	2	1	3	3	2	0	0	1	2	3	0	1	1	3	1	0	0	0	0	0	0	0	0	0	1	0	0	0	0	0	0	0	0	0	0	0	0	0	0	0	0	0	0	0
FAP	Q12884	Prolyl endopeptidase FAP OS=Homo sapiens GN=FAP PE=1 SV=5	Prolyl endopeptidase FAP;Antiplasmin-cleaving enzyme FAP, soluble form	16	16	16	1	16	16	16	15	0	13	13	13	2	10	7	9	8	0	15	3	14	14	11	5	0	0	5	0	1	13	0	2	1	0	0	0	0	1	2	0	12	0	11	12	0	10
FARP1	Q9Y4F1	FERM, RhoGEF and pleckstrin domain-containing protein 1 OS=Homo sapiens GN=FARP1 PE=1 SV=1	FERM, RhoGEF and pleckstrin domain-containing protein 1	14	14	14	1	14	14	14	13	1	2	2	5	0	0	1	4	1	0	12	0	12	12	10	2	0	1	4	1	1	9	0	1	0	0	0	0	1	0	0	0	6	0	7	6	0	3
FARSA	Q9Y285	Phenylalanine--tRNA ligase alpha subunit OS=Homo sapiens GN=FARSA PE=1 SV=3	Phenylalanine--tRNA ligase alpha subunit	2	2	2	1	2	2	2	2	0	2	2	2	0	2	1	2	2	1	1	1	1	1	1	0	0	0	1	0	0	1	1	0	0	0	0	0	0	0	1	0	0	0	0	0	0	0
FARSB	Q9NSD9	Phenylalanine--tRNA ligase beta subunit OS=Homo sapiens GN=FARSB PE=1 SV=3	Phenylalanine--tRNA ligase beta subunit	4	4	4	1	4	4	4	2	0	2	2	2	0	3	1	4	3	0	1	1	2	2	1	0	1	0	0	0	0	0	0	1	0	0	0	0	0	0	2	0	0	0	1	1	0	0
FAS	P25445	Tumor necrosis factor receptor superfamily member 6 OS=Homo sapiens GN=FAS PE=1 SV=1	Tumor necrosis factor receptor superfamily member 6	2	2	2	1	2	2	2	2	0	2	2	2	2	2	2	2	2	0	2	0	2	2	1	0	0	0	1	0	0	2	0	2	0	1	0	0	0	0	0	0	0	0	1	1	0	0
FASN	P49327	Fatty acid synthase OS=Homo sapiens GN=FASN PE=1 SV=3	Fatty acid synthase;[Acyl-carrier-protein] S-acetyltransferase;[Acyl-carrier-protein] S-malonyltransferase;3-oxoacyl-[acyl-carrier-protein] synthase;3-oxoacyl-[acyl-carrier-protein] reductase;3-hydroxyacyl-[acyl-carrier-protein] dehydratase;Enoyl-[acyl-carrier-protein] reductase;Oleoyl-[acyl-carrier-protein] hydrolase	65	65	65	1	65	65	65	49	2	56	53	54	25	47	41	61	50	8	48	36	39	38	34	18	2	1	22	6	1	32	8	28	11	20	7	2	0	11	25	0	31	1	26	21	1	19
FAT1	Q14517	Protocadherin Fat 1 OS=Homo sapiens GN=FAT1 PE=1 SV=2	Protocadherin Fat 1;Protocadherin Fat 1, nuclear form	14	14	14	1	14	14	14	10	0	3	3	6	1	2	1	4	3	1	10	1	13	14	12	5	0	0	6	0	0	8	1	1	0	1	1	0	0	0	0	0	6	0	5	6	0	4
FAT4	Q6V0I7	Protocadherin Fat 4 OS=Homo sapiens GN=FAT4 PE=1 SV=2	Protocadherin Fat 4	4	4	4	1	4	4	4	4	1	0	1	2	0	0	0	0	0	0	4	0	4	4	3	1	0	0	0	0	1	2	1	0	0	2	1	0	0	0	0	0	2	0	1	0	0	1
FBL	P22087	rRNA 2-O-methyltransferase fibrillarin OS=Homo sapiens GN=FBL PE=1 SV=2	rRNA 2-O-methyltransferase fibrillarin	6	6	6	1	6	6	6	2	1	2	2	2	0	2	4	6	5	0	1	0	1	1	0	0	0	0	0	0	1	0	0	1	0	0	0	0	0	0	2	0	0	0	0	0	0	0
FDFT1	P37268	Squalene synthase OS=Homo sapiens GN=FDFT1 PE=1 SV=1	Squalene synthase	2	2	2	1	2	2	2	1	0	1	2	1	0	1	0	2	2	0	1	0	1	1	0	0	0	0	0	0	0	0	0	0	0	0	0	0	0	0	0	0	0	0	0	0	0	0
FDPS	P14324	Farnesyl pyrophosphate synthase OS=Homo sapiens GN=FDPS PE=1 SV=4	Farnesyl pyrophosphate synthase	6	6	6	1	6	6	6	5	0	5	5	5	3	5	5	4	5	1	4	4	4	4	2	1	1	0	1	0	0	4	0	3	1	1	0	0	0	1	0	0	4	0	3	2	0	2
FER1L4	A9Z1Z3	Fer-1-like protein 4 OS=Homo sapiens GN=FER1L4 PE=2 SV=1	Fer-1-like protein 4	3	2	2	1	3	2	2	1	0	1	1	1	1	1	1	2	0	1	1	1	1	1	0	0	0	0	1	1	0	0	0	2	0	1	0	0	0	0	1	0	0	0	0	1	0	0
FERMT2	Q96AC1	Fermitin family homolog 2 OS=Homo sapiens GN=FERMT2 PE=1 SV=1	Fermitin family homolog 2	7;1	7;1	7;1	2	7	7	7	7	0	6	7	7	2	5	4	6	6	0	6	4	6	7	5	3	0	0	0	0	0	4	0	3	1	1	1	0	0	0	2	0	3	0	3	2	0	2
FGD6	Q6ZV73	FYVE, RhoGEF and PH domain-containing protein 6 OS=Homo sapiens GN=FGD6 PE=1 SV=2	FYVE, RhoGEF and PH domain-containing protein 6	2	2	2	1	2	2	2	2	2	1	2	2	1	2	2	2	2	2	2	1	2	2	2	2	1	1	2	2	2	1	2	2	1	2	1	0	0	1	2	1	2	1	2	2	1	2
FGL2	Q14314	Fibroleukin OS=Homo sapiens GN=FGL2 PE=1 SV=1	Fibroleukin	20	20	20	1	20	20	20	2	0	2	1	1	0	1	1	1	0	0	3	0	0	1	1	1	0	0	16	13	0	1	4	0	0	0	0	0	0	0	1	0	1	0	1	0	0	2
FH	P07954	Fumarate hydratase, mitochondrial OS=Homo sapiens GN=FH PE=1 SV=3	Fumarate hydratase, mitochondrial	5	5	5	1	5	5	5	4	0	5	4	5	1	3	3	4	3	0	4	1	3	4	4	0	0	0	1	0	0	5	0	0	1	1	0	0	0	0	1	0	3	0	2	1	0	2
FKBP10	Q96AY3	Peptidyl-prolyl cis-trans isomerase FKBP10 OS=Homo sapiens GN=FKBP10 PE=1 SV=1	Peptidyl-prolyl cis-trans isomerase FKBP10	7	7	7	1	7	7	7	5	1	6	4	4	3	5	3	7	6	2	4	4	4	4	7	2	0	0	1	1	0	4	1	3	1	3	1	0	0	0	4	0	3	0	1	2	1	2
FKBP1A	P62942	Peptidyl-prolyl cis-trans isomerase FKBP1A OS=Homo sapiens GN=FKBP1A PE=1 SV=2	Peptidyl-prolyl cis-trans isomerase FKBP1A	2	2	2	1	2	2	2	2	1	2	2	2	1	2	2	2	1	1	2	2	2	2	1	2	1	0	1	1	0	1	1	2	1	2	1	2	1	2	1	0	1	1	2	2	0	1
FKBP2	P26885	Peptidyl-prolyl cis-trans isomerase FKBP2 OS=Homo sapiens GN=FKBP2 PE=1 SV=2	Peptidyl-prolyl cis-trans isomerase FKBP2	2	2	2	1	2	2	2	1	0	1	0	1	0	0	0	1	0	0	1	0	1	1	1	1	0	0	1	0	0	1	1	0	0	0	0	0	0	0	1	0	1	0	1	1	0	1
FKBP4	Q02790	Peptidyl-prolyl cis-trans isomerase FKBP4 OS=Homo sapiens GN=FKBP4 PE=1 SV=3	Peptidyl-prolyl cis-trans isomerase FKBP4;Peptidyl-prolyl cis-trans isomerase FKBP4, N-terminally processed	15	15	15	1	15	15	15	9	0	13	11	12	4	11	8	12	13	1	6	3	4	3	1	0	0	0	0	0	0	1	0	5	3	5	2	2	1	2	3	0	0	1	2	1	0	1
FLII	Q13045	Protein flightless-1 homolog OS=Homo sapiens GN=FLII PE=1 SV=2	Protein flightless-1 homolog	2	2	2	1	2	2	2	1	0	2	2	2	0	2	2	2	2	0	1	0	2	0	0	0	0	0	0	0	0	1	0	0	0	0	0	0	0	0	1	0	0	0	0	0	0	0
FLNA	P21333	Filamin-A OS=Homo sapiens GN=FLNA PE=1 SV=4	Filamin-A	95	88	86	1	95	88	86	76	4	85	83	88	55	80	66	85	72	27	75	48	68	67	59	42	8	9	41	16	2	63	19	52	32	47	19	7	8	19	43	5	58	4	61	53	6	38
FLNB	O75369	Filamin-B OS=Homo sapiens GN=FLNB PE=1 SV=2	Filamin-B	49	40	40	1	49	40	40	29	1	39	32	36	15	35	30	37	30	11	32	20	24	27	18	5	1	1	3	2	0	20	3	24	7	16	5	2	1	3	17	0	13	0	18	14	0	12
FLNC	Q14315	Filamin-C OS=Homo sapiens GN=FLNC PE=1 SV=3	Filamin-C	102	102	92	1	102	102	92	80	1	85	81	83	44	77	67	91	79	13	81	38	74	66	52	20	4	1	29	16	1	59	5	48	25	37	18	7	6	18	46	0	43	3	60	51	4	34
FLOT1	O75955	Flotillin-1 OS=Homo sapiens GN=FLOT1 PE=1 SV=3	Flotillin-1	19	19	19	1	19	19	19	16	0	18	17	18	11	16	16	13	13	2	18	13	12	14	13	9	0	0	10	1	0	18	0	8	4	11	6	2	1	1	5	0	15	0	7	8	0	9
FLOT2	Q14254	Flotillin-2 OS=Homo sapiens GN=FLOT2 PE=1 SV=2	Flotillin-2	22	22	22	1	22	22	22	14	0	20	19	19	11	16	12	17	12	2	16	9	9	13	14	5	0	0	3	1	2	14	0	10	5	4	5	2	0	1	3	0	14	0	3	4	0	7
FMNL2	Q96PY5	Formin-like protein 2 OS=Homo sapiens GN=FMNL2 PE=1 SV=3	Formin-like protein 2	6	6	3	1	6	6	3	6	0	3	4	5	2	2	2	2	2	0	6	1	6	6	6	0	0	0	0	0	0	3	0	1	1	0	0	1	0	0	1	0	3	1	3	2	0	2
FMNL3	Q8IVF7	Formin-like protein 3 OS=Homo sapiens GN=FMNL3 PE=1 SV=3	Formin-like protein 3	5	2	2	1	5	2	2	5	0	2	2	2	1	1	0	1	1	0	5	0	5	5	5	1	0	0	0	0	0	3	0	0	1	0	0	0	0	0	1	1	3	0	1	1	0	1
FN1	P02751	Fibronectin OS=Homo sapiens GN=FN1 PE=1 SV=4	Fibronectin;Anastellin;Ugl-Y1;Ugl-Y2;Ugl-Y3	63	63	63	1	63	63	63	30	10	7	9	20	11	16	23	47	34	10	44	13	26	33	38	43	7	9	51	32	9	53	21	6	1	4	2	0	3	6	21	3	48	0	28	33	6	43
FOCAD	Q5VW36	Focadhesin OS=Homo sapiens GN=FOCAD PE=1 SV=1	Focadhesin	2	2	2	1	2	2	2	0	0	0	0	0	0	0	0	0	1	0	0	0	0	0	0	0	0	0	0	0	0	0	0	0	0	0	0	0	0	0	0	0	0	0	0	0	0	0
FRYL	O94915	Protein furry homolog-like OS=Homo sapiens GN=FRYL PE=1 SV=2	Protein furry homolog-like	9	9	9	1	9	9	9	2	0	6	6	6	0	5	1	6	3	1	2	0	3	2	1	0	0	0	0	0	0	0	1	1	0	2	1	0	0	0	2	0	1	0	0	0	0	0
FSCN1	Q16658	Fascin OS=Homo sapiens GN=FSCN1 PE=1 SV=3	Fascin	22	22	22	1	22	22	22	13	1	16	14	14	7	13	9	18	13	1	13	4	14	11	9	5	0	0	4	3	1	8	2	8	4	6	1	0	0	2	6	1	6	0	10	10	1	8
FTH1	P02794	Ferritin heavy chain OS=Homo sapiens GN=FTH1 PE=1 SV=2	Ferritin heavy chain;Ferritin heavy chain, N-terminally processed	5	5	5	1	5	5	5	4	2	4	3	3	2	3	3	3	3	2	4	2	3	3	2	0	1	0	2	2	2	3	2	3	1	2	1	0	0	0	2	0	3	0	4	4	0	4
FTL	P02792	Ferritin light chain OS=Homo sapiens GN=FTL PE=1 SV=2	Ferritin light chain	4	4	4	1	4	4	4	3	0	3	2	1	0	1	0	2	0	0	3	0	2	3	1	0	0	0	1	1	0	2	0	1	0	1	0	0	0	0	0	0	2	0	3	2	0	1
FUBP1	Q96AE4	Far upstream element-binding protein 1 OS=Homo sapiens GN=FUBP1 PE=1 SV=3	Far upstream element-binding protein 1	3	3	3	1	3	3	3	1	0	3	3	3	1	3	2	3	2	0	1	0	1	0	0	0	0	0	0	0	0	0	1	1	0	0	0	0	0	0	1	0	1	0	0	0	0	1
FUCA1	P04066	Tissue alpha-L-fucosidase OS=Homo sapiens GN=FUCA1 PE=1 SV=4	Tissue alpha-L-fucosidase	2	2	2	1	2	2	2	2	0	2	2	2	0	2	2	1	2	2	2	2	2	1	1	1	0	0	1	0	0	2	1	0	0	0	0	0	0	0	0	0	2	0	1	1	0	1
FUS	P35637	RNA-binding protein FUS OS=Homo sapiens GN=FUS PE=1 SV=1;TATA-binding protein-associated factor 2N OS=Homo sapiens GN=TAF15 PE=1 SV=1	RNA-binding protein FUS;TATA-binding protein-associated factor 2N	2;1	2;1	2;1	2	2	2	2	0	0	2	2	2	1	2	1	2	2	0	0	0	0	0	0	0	0	0	0	0	0	0	0	1	0	1	0	0	0	0	0	0	0	0	0	0	0	0
FXR1	P51114	Fragile X mental retardation syndrome-related protein 1 OS=Homo sapiens GN=FXR1 PE=1 SV=3	Fragile X mental retardation syndrome-related protein 1	6;1	6;1	4;0	2	6	6	4	3	0	3	2	3	2	4	3	5	5	1	1	1	2	2	1	0	0	0	1	1	0	0	1	2	0	3	0	0	0	1	2	0	0	0	1	1	0	1
FZD2	Q14332	Frizzled-2 OS=Homo sapiens GN=FZD2 PE=2 SV=1	Frizzled-2	2	2	1	1	2	2	1	2	1	1	0	1	1	1	1	1	1	0	2	1	1	2	0	0	0	0	0	1	0	0	0	0	0	0	0	0	0	0	1	0	1	0	0	1	0	1
G3BP1	Q13283	Ras GTPase-activating protein-binding protein 1 OS=Homo sapiens GN=G3BP1 PE=1 SV=1	Ras GTPase-activating protein-binding protein 1	4	4	4	1	4	4	4	3	0	3	2	3	0	2	3	3	3	1	3	1	2	2	2	0	0	0	0	0	0	2	0	0	0	0	0	0	0	0	1	0	0	0	0	1	0	0
G3BP2	Q9UN86	Ras GTPase-activating protein-binding protein 2 OS=Homo sapiens GN=G3BP2 PE=1 SV=2	Ras GTPase-activating protein-binding protein 2	2	2	2	1	2	2	2	1	0	2	1	1	0	0	1	0	2	0	1	1	0	0	0	0	0	0	0	0	0	0	0	0	0	0	0	0	0	0	0	0	0	0	0	0	0	0
G6PD	P11413	Glucose-6-phosphate 1-dehydrogenase OS=Homo sapiens GN=G6PD PE=1 SV=4	Glucose-6-phosphate 1-dehydrogenase	12	12	12	1	12	12	12	12	0	12	12	11	7	11	8	12	12	2	10	9	9	9	5	4	0	0	3	2	0	8	2	9	3	7	1	0	0	1	6	0	5	0	6	5	0	4
GABARAPL2	P60520	Gamma-aminobutyric acid receptor-associated protein-like 2 OS=Homo sapiens GN=GABARAPL2 PE=1 SV=1	Gamma-aminobutyric acid receptor-associated protein-like 2	3	3	3	1	3	3	3	3	0	3	3	3	1	2	2	2	0	0	3	0	3	3	3	0	0	0	1	1	0	1	0	3	0	3	0	0	0	0	0	0	0	0	2	2	0	0
GALK1	P51570	Galactokinase OS=Homo sapiens GN=GALK1 PE=1 SV=1	Galactokinase	6	6	6	1	6	6	6	3	0	3	2	2	1	2	1	5	4	0	2	1	3	3	1	1	0	0	3	0	0	0	1	2	0	1	1	0	0	0	0	0	0	0	1	1	0	0
GALNT2	Q10471	Polypeptide N-acetylgalactosaminyltransferase 2 OS=Homo sapiens GN=GALNT2 PE=1 SV=1	Polypeptide N-acetylgalactosaminyltransferase 2;Polypeptide N-acetylgalactosaminyltransferase 2 soluble form	5	5	5	1	5	5	5	0	0	2	2	4	0	2	2	5	3	0	1	0	0	0	1	0	0	0	0	0	0	0	0	0	0	0	0	0	0	0	0	0	0	0	0	1	0	0
GANAB	Q14697	Neutral alpha-glucosidase AB OS=Homo sapiens GN=GANAB PE=1 SV=3	Neutral alpha-glucosidase AB	22	22	22	1	22	22	22	16	0	19	19	18	5	20	18	21	19	3	18	11	8	7	7	4	0	0	8	1	1	12	1	5	1	3	1	0	0	1	4	0	11	0	7	5	0	5
GAPDH	P04406	Glyceraldehyde-3-phosphate dehydrogenase OS=Homo sapiens GN=GAPDH PE=1 SV=3	Glyceraldehyde-3-phosphate dehydrogenase	22;1	22;1	22;1	2	22	22	22	17	12	19	17	18	15	18	17	19	17	15	19	17	17	18	17	15	10	8	14	9	6	16	12	15	15	14	12	7	8	13	15	10	19	8	17	16	8	16
GARS	P41250	Glycine--tRNA ligase OS=Homo sapiens GN=GARS PE=1 SV=3	Glycine--tRNA ligase	21	21	21	1	21	21	21	14	1	15	14	14	8	11	9	19	14	1	13	7	10	11	10	2	1	2	4	2	0	8	0	9	4	8	2	1	0	3	6	0	3	1	3	3	0	5
GART	P22102	Trifunctional purine biosynthetic protein adenosine-3 OS=Homo sapiens GN=GART PE=1 SV=1	Trifunctional purine biosynthetic protein adenosine-3;Phosphoribosylamine--glycine ligase;Phosphoribosylformylglycinamidine cyclo-ligase;Phosphoribosylglycinamide formyltransferase	6	6	6	1	6	6	6	3	0	4	3	3	0	3	2	6	3	1	2	1	2	3	2	0	0	0	0	0	0	2	0	1	0	1	0	0	0	0	1	0	2	0	2	3	0	1
GAS6	Q14393	Growth arrest-specific protein 6 OS=Homo sapiens GN=GAS6 PE=1 SV=2	Growth arrest-specific protein 6	4	4	4	1	4	4	4	3	0	3	1	2	0	0	0	0	1	0	4	0	4	4	3	1	0	0	2	0	0	4	1	0	0	1	0	0	0	0	0	0	2	0	0	0	0	0
GBA	P04062	Glucosylceramidase OS=Homo sapiens GN=GBA PE=1 SV=3	Glucosylceramidase	6	6	6	1	6	6	6	4	3	6	5	6	5	6	5	6	6	5	4	6	4	3	3	4	0	1	2	1	1	4	3	3	1	3	2	0	0	0	2	0	3	0	3	3	0	4
GBE1	Q04446	1,4-alpha-glucan-branching enzyme OS=Homo sapiens GN=GBE1 PE=1 SV=3	1,4-alpha-glucan-branching enzyme	4	4	4	1	4	4	4	2	0	2	2	2	1	2	0	1	1	0	2	0	1	0	0	0	0	0	0	0	0	0	0	1	0	0	0	0	0	0	0	0	0	0	2	0	0	0
GCLM	P48507	Glutamate--cysteine ligase regulatory subunit OS=Homo sapiens GN=GCLM PE=1 SV=1	Glutamate--cysteine ligase regulatory subunit	2	2	2	1	2	2	2	1	0	2	2	2	1	1	1	2	2	0	1	0	1	1	0	0	0	1	0	0	0	0	0	1	0	0	0	0	0	0	0	0	0	0	1	0	0	0
GCN1L1	Q92616	Translational activator GCN1 OS=Homo sapiens GN=GCN1L1 PE=1 SV=6	Translational activator GCN1	20	20	20	1	20	20	20	10	0	9	7	6	0	8	3	20	15	0	4	2	4	5	3	0	0	0	1	0	0	1	0	1	0	0	0	0	0	2	3	0	0	0	1	0	0	0
GDI1	P31150	Rab GDP dissociation inhibitor alpha OS=Homo sapiens GN=GDI1 PE=1 SV=2	Rab GDP dissociation inhibitor alpha	18	10	10	1	18	10	10	16	2	16	15	14	6	14	11	14	12	3	15	9	13	12	11	6	0	2	3	2	0	12	3	8	2	5	2	0	0	0	3	0	10	1	9	9	0	7
GDI2	P50395	Rab GDP dissociation inhibitor beta OS=Homo sapiens GN=GDI2 PE=1 SV=2	Rab GDP dissociation inhibitor beta	23	23	15	1	23	23	15	22	3	22	21	20	9	20	17	19	17	6	21	14	20	19	16	7	0	3	7	2	0	20	5	14	6	11	5	0	0	0	7	1	15	1	16	17	1	8
GDPD3	Q7L5L3	Glycerophosphodiester phosphodiesterase domain-containing protein 3 OS=Homo sapiens GN=GDPD3 PE=2 SV=3	Glycerophosphodiester phosphodiesterase domain-containing protein 3	2	2	2	1	2	2	2	2	2	2	2	2	0	2	2	1	2	2	2	2	2	2	2	2	1	1	1	1	1	2	2	1	0	1	0	1	0	0	1	1	2	0	0	0	1	0
GEMIN5	Q8TEQ6	Gem-associated protein 5 OS=Homo sapiens GN=GEMIN5 PE=1 SV=3	Gem-associated protein 5	4	4	4	1	4	4	4	0	0	1	1	1	0	1	1	4	4	0	0	0	1	0	1	0	0	0	0	0	0	0	0	0	0	0	0	0	0	0	2	0	0	0	1	1	0	1
GFPT1	Q06210	Glutamine--fructose-6-phosphate aminotransferase [isomerizing] 1 OS=Homo sapiens GN=GFPT1 PE=1 SV=3	Glutamine--fructose-6-phosphate aminotransferase [isomerizing] 1	15;5	15;5	15;5	2	15	15	15	11	0	11	12	11	3	11	9	15	12	1	9	3	10	12	2	0	0	0	3	1	0	2	0	4	1	3	2	0	0	2	8	0	0	0	2	2	0	1
GGCT	O75223	Gamma-glutamylcyclotransferase OS=Homo sapiens GN=GGCT PE=1 SV=1	Gamma-glutamylcyclotransferase	8	8	8	1	8	8	8	5	5	5	5	5	3	5	6	4	6	5	5	6	5	6	6	6	4	4	6	4	4	5	5	4	2	4	1	4	3	3	5	2	6	1	7	7	3	8
GGH	Q92820	Gamma-glutamyl hydrolase OS=Homo sapiens GN=GGH PE=1 SV=2	Gamma-glutamyl hydrolase	6	6	6	1	6	6	6	4	3	4	4	5	2	4	3	5	4	4	3	4	4	4	4	4	1	1	3	3	1	4	2	2	2	4	1	2	1	1	5	2	4	0	4	4	0	5
GGT3P	A6NGU5	Putative gamma-glutamyltranspeptidase 3 OS=Homo sapiens GN=GGT3P PE=5 SV=2;Inactive gamma-glutamyltranspeptidase 2 OS=Homo sapiens GN=GGT2 PE=1 SV=3;Gamma-glutamyltranspeptidase 1 OS=Homo sapiens GN=GGT1 PE=1 SV=2;Gamma-glutamyltransferase light chain 2 OS	Putative gamma-glutamyltranspeptidase 3;Putative gamma-glutamyltranspeptidase 3 heavy chain;Putative gamma-glutamyltranspeptidase 3 light chain;Inactive gamma-glutamyltranspeptidase 2;Gamma-glutamyltranspeptidase 1;Gamma-glutamyltranspeptidase 1 heavy chain;Gamma-glutamyltranspeptidase 1 light chain;Gamma-glutamyltransferase light chain 2;Putative gamma-glutamyltransferase light chain 3	2;2;2;1;1	2;2;2;1;1	2;2;2;1;1	5	2	2	2	2	0	2	2	2	0	0	1	0	0	0	2	0	2	2	2	0	0	0	0	0	0	2	0	0	0	0	0	0	0	0	0	0	0	0	0	1	0	1
GIPC1	O14908	PDZ domain-containing protein GIPC1 OS=Homo sapiens GN=GIPC1 PE=1 SV=2	PDZ domain-containing protein GIPC1	7	7	7	1	7	7	7	6	0	7	7	7	1	2	2	4	2	0	7	0	6	5	5	2	0	1	1	1	0	4	1	0	0	1	0	1	0	0	0	0	3	0	3	3	0	2
GJA1	P17302	Gap junction alpha-1 protein OS=Homo sapiens GN=GJA1 PE=1 SV=2	Gap junction alpha-1 protein	5	5	5	1	5	5	5	5	0	0	0	0	0	1	1	1	0	0	5	0	3	4	4	4	0	0	4	2	0	5	0	0	0	1	0	0	0	1	0	0	4	0	3	4	1	3
GLA	P06280	Alpha-galactosidase A OS=Homo sapiens GN=GLA PE=1 SV=1	Alpha-galactosidase A	3	3	3	1	3	3	3	2	0	2	2	2	0	2	2	2	2	1	2	1	2	2	2	2	0	0	0	0	0	3	1	0	0	0	0	0	0	0	1	0	2	0	1	1	0	1
GLB1	P16278	Beta-galactosidase OS=Homo sapiens GN=GLB1 PE=1 SV=2	Beta-galactosidase	6	6	6	1	6	6	6	3	0	4	5	6	0	6	3	5	4	2	4	4	4	4	3	3	0	1	1	0	0	4	2	1	1	2	2	1	0	1	2	0	4	1	4	4	0	2
GLG1	Q92896	Golgi apparatus protein 1 OS=Homo sapiens GN=GLG1 PE=1 SV=2	Golgi apparatus protein 1	3	3	3	1	3	3	3	3	0	3	2	3	0	2	2	3	3	0	3	0	0	1	0	0	0	0	0	0	0	1	0	0	0	0	0	0	0	0	0	0	0	0	0	0	0	1
GLIPR2	Q9H4G4	Golgi-associated plant pathogenesis-related protein 1 OS=Homo sapiens GN=GLIPR2 PE=1 SV=3	Golgi-associated plant pathogenesis-related protein 1	5	5	5	1	5	5	5	4	0	4	4	4	2	2	2	2	3	0	4	0	4	3	3	3	0	0	1	1	0	4	0	2	2	2	1	1	0	0	0	0	3	0	4	4	1	2
GLO1	Q04760	Lactoylglutathione lyase OS=Homo sapiens GN=GLO1 PE=1 SV=4	Lactoylglutathione lyase	6	6	6	1	6	6	6	3	0	5	5	5	2	4	4	4	4	0	4	3	5	3	4	0	0	0	0	0	0	3	0	3	1	2	1	0	0	0	2	0	2	0	1	2	0	1
GLOD4	Q9HC38	Glyoxalase domain-containing protein 4 OS=Homo sapiens GN=GLOD4 PE=1 SV=1	Glyoxalase domain-containing protein 4	4	4	4	1	4	4	4	2	0	3	2	2	1	2	2	2	2	0	2	0	2	2	2	1	0	0	1	0	0	2	1	2	1	1	1	0	0	0	1	0	0	0	2	2	0	2
GLRX3	O76003	Glutaredoxin-3 OS=Homo sapiens GN=GLRX3 PE=1 SV=2	Glutaredoxin-3	4	4	4	1	4	4	4	4	0	4	4	4	2	4	0	3	3	1	4	0	2	3	1	2	0	1	0	1	0	1	0	2	1	0	1	0	0	0	2	0	2	0	2	2	0	2
GLUD1	P00367	Glutamate dehydrogenase 1, mitochondrial OS=Homo sapiens GN=GLUD1 PE=1 SV=2;Glutamate dehydrogenase 2, mitochondrial OS=Homo sapiens GN=GLUD2 PE=1 SV=2	Glutamate dehydrogenase 1, mitochondrial;Glutamate dehydrogenase 2, mitochondrial	5;3	5;3	5;3	2	5	5	5	4	0	2	3	4	1	4	5	5	5	0	3	1	3	3	4	1	0	0	0	1	0	3	0	1	0	1	0	0	0	0	0	0	2	0	0	0	0	0
GM2A	P17900	Ganglioside GM2 activator OS=Homo sapiens GN=GM2A PE=1 SV=4	Ganglioside GM2 activator;Ganglioside GM2 activator isoform short	4	4	4	1	4	4	4	4	2	3	4	3	3	4	4	2	4	3	4	4	3	1	3	2	1	3	3	3	1	3	4	3	1	4	2	0	1	2	1	2	3	1	3	3	2	3
GMFB	P60983	Glia maturation factor beta OS=Homo sapiens GN=GMFB PE=1 SV=2	Glia maturation factor beta	5;1	5;1	5;1	2	5	5	5	5	0	5	4	5	0	3	1	5	3	0	4	0	2	2	3	0	0	0	1	0	0	2	0	3	1	1	1	0	1	0	0	0	0	0	3	1	0	0
GMPS	P49915	GMP synthase [glutamine-hydrolyzing] OS=Homo sapiens GN=GMPS PE=1 SV=1	GMP synthase [glutamine-hydrolyzing]	3	3	3	1	3	3	3	1	0	1	1	1	0	1	1	3	2	0	1	0	2	2	0	0	0	0	0	0	0	0	0	0	1	0	0	0	0	0	1	0	0	0	0	0	0	0
GNA11	P29992	Guanine nucleotide-binding protein subunit alpha-11 OS=Homo sapiens GN=GNA11 PE=1 SV=2	Guanine nucleotide-binding protein subunit alpha-11	12;5;1;1	11;4;0;0	8;2;0;0	4	12	11	8	10	0	11	11	11	3	6	3	7	7	1	11	1	11	10	9	4	0	0	2	1	0	10	1	5	2	3	1	0	0	0	1	0	5	0	5	5	0	4
GNA13	Q14344	Guanine nucleotide-binding protein subunit alpha-13 OS=Homo sapiens GN=GNA13 PE=1 SV=2	Guanine nucleotide-binding protein subunit alpha-13	14	14	13	1	14	14	13	11	0	11	11	11	2	9	5	10	8	0	11	4	8	10	6	1	0	0	1	0	0	6	0	5	2	4	1	0	0	0	4	0	3	0	4	2	0	1
GNAI1	P63096	Guanine nucleotide-binding protein G(i) subunit alpha-1 OS=Homo sapiens GN=GNAI1 PE=1 SV=2	Guanine nucleotide-binding protein G(i) subunit alpha-1	10	4	4	1	10	4	4	8	0	8	8	8	5	7	6	6	6	2	8	6	8	8	7	5	1	1	3	2	0	8	1	4	5	3	2	3	1	3	5	0	7	1	9	8	1	6
GNAI2	P04899	Guanine nucleotide-binding protein G(i) subunit alpha-2 OS=Homo sapiens GN=GNAI2 PE=1 SV=3	Guanine nucleotide-binding protein G(i) subunit alpha-2	17;2;2;2;1	17;2;2;2;1	11;0;0;0;0	5	17	17	11	17	0	16	15	16	10	12	10	12	9	4	17	10	15	14	15	9	4	2	9	2	0	15	2	10	9	8	6	4	1	6	7	0	15	1	16	14	4	12
GNAI3	P08754	Guanine nucleotide-binding protein G(k) subunit alpha OS=Homo sapiens GN=GNAI3 PE=1 SV=3	Guanine nucleotide-binding protein G(k) subunit alpha	13	7	7	1	13	7	7	12	0	13	12	13	7	10	7	10	7	3	12	6	11	11	11	7	1	1	4	2	0	9	2	7	6	5	3	3	2	5	6	0	8	1	9	9	2	9
GNAO1	P09471	Guanine nucleotide-binding protein G(o) subunit alpha OS=Homo sapiens GN=GNAO1 PE=1 SV=4	Guanine nucleotide-binding protein G(o) subunit alpha	4	2	2	1	4	2	2	2	0	3	3	3	1	2	1	2	1	1	2	1	2	2	2	1	1	1	1	1	0	2	0	2	2	1	1	2	1	1	3	0	2	1	2	2	1	2
GNAQ	P50148	Guanine nucleotide-binding protein G(q) subunit alpha OS=Homo sapiens GN=GNAQ PE=1 SV=4	Guanine nucleotide-binding protein G(q) subunit alpha	8	4	4	1	8	4	4	7	0	7	7	7	0	5	4	5	3	1	7	1	7	7	6	6	0	0	3	0	0	7	2	2	2	2	0	0	0	0	2	0	5	0	3	3	0	2
GNAS	P63092	Guanine nucleotide-binding protein G(s) subunit alpha isoforms short OS=Homo sapiens GN=GNAS PE=1 SV=1;Guanine nucleotide-binding protein G(s) subunit alpha isoforms XLas OS=Homo sapiens GN=GNAS PE=1 SV=2	Guanine nucleotide-binding protein G(s) subunit alpha isoforms short;Guanine nucleotide-binding protein G(s) subunit alpha isoforms XLas	8;8	7;7	7;7	2	8	7	7	8	1	8	7	7	3	6	4	6	5	2	8	4	7	7	6	5	2	2	3	2	0	6	1	5	2	4	2	1	2	1	4	1	5	2	5	6	1	4
GNB1	P62873	Guanine nucleotide-binding protein G(I)/G(S)/G(T) subunit beta-1 OS=Homo sapiens GN=GNB1 PE=1 SV=3	Guanine nucleotide-binding protein G(I)/G(S)/G(T) subunit beta-1	13;2	13;2	7;0	2	13	13	7	11	2	12	10	12	7	10	8	11	10	4	11	9	8	9	11	5	3	1	7	4	1	10	4	7	8	8	4	4	3	4	7	0	11	1	12	11	1	10
GNB2	P62879	Guanine nucleotide-binding protein G(I)/G(S)/G(T) subunit beta-2 OS=Homo sapiens GN=GNB2 PE=1 SV=3	Guanine nucleotide-binding protein G(I)/G(S)/G(T) subunit beta-2	12	6	4	1	12	6	4	11	2	11	9	11	6	9	9	11	11	4	11	8	8	9	10	6	4	1	5	3	1	10	4	8	9	7	5	4	1	5	7	1	10	1	11	10	2	10
GNB2L1	P63244	Guanine nucleotide-binding protein subunit beta-2-like 1 OS=Homo sapiens GN=GNB2L1 PE=1 SV=3	Guanine nucleotide-binding protein subunit beta-2-like 1;Guanine nucleotide-binding protein subunit beta-2-like 1, N-terminally processed	14	14	14	1	14	14	14	11	1	13	14	13	6	13	13	14	13	6	12	7	10	6	6	5	1	0	6	1	2	6	1	7	3	7	1	2	2	3	6	3	3	1	7	5	2	4
GNB4	Q9HAV0	Guanine nucleotide-binding protein subunit beta-4 OS=Homo sapiens GN=GNB4 PE=1 SV=3	Guanine nucleotide-binding protein subunit beta-4	7	2	2	1	7	2	2	5	2	5	5	5	3	5	4	4	4	3	5	4	5	5	5	2	3	1	3	2	1	5	3	4	4	3	4	3	1	4	4	0	5	1	5	4	1	5
GNG12	Q9UBI6	Guanine nucleotide-binding protein G(I)/G(S)/G(O) subunit gamma-12 OS=Homo sapiens GN=GNG12 PE=1 SV=3	Guanine nucleotide-binding protein G(I)/G(S)/G(O) subunit gamma-12	6	6	6	1	6	6	6	6	1	6	6	5	4	6	5	5	5	2	6	3	6	5	5	3	3	2	2	2	0	5	1	5	5	5	4	3	1	3	3	1	5	0	5	5	3	5
GNG5	P63218	Guanine nucleotide-binding protein G(I)/G(S)/G(O) subunit gamma-5 OS=Homo sapiens GN=GNG5 PE=1 SV=3	Guanine nucleotide-binding protein G(I)/G(S)/G(O) subunit gamma-5	2	2	2	1	2	2	2	2	0	2	2	2	2	2	1	2	2	0	2	1	2	2	2	0	0	0	1	0	1	1	0	2	2	2	1	0	1	1	1	1	2	0	2	1	0	1
GNL1	P36915	Guanine nucleotide-binding protein-like 1 OS=Homo sapiens GN=GNL1 PE=1 SV=2	Guanine nucleotide-binding protein-like 1	4	4	4	1	4	4	4	2	0	2	2	2	0	1	2	4	3	0	2	1	1	1	0	0	0	0	0	0	0	0	0	0	0	0	0	0	0	0	2	0	0	0	0	0	0	0
GNL3	Q9BVP2	Guanine nucleotide-binding protein-like 3 OS=Homo sapiens GN=GNL3 PE=1 SV=2	Guanine nucleotide-binding protein-like 3	3	3	3	1	3	3	3	0	0	0	0	0	1	0	0	3	2	0	0	0	0	0	0	0	0	0	0	0	0	0	0	1	0	0	0	0	0	0	0	0	0	0	0	0	0	0
GNPDA1	P46926	Glucosamine-6-phosphate isomerase 1 OS=Homo sapiens GN=GNPDA1 PE=1 SV=1	Glucosamine-6-phosphate isomerase 1	11	11	8	1	11	11	8	10	0	11	7	10	5	8	8	8	8	2	10	7	6	5	5	3	0	0	1	0	0	6	3	5	0	4	1	0	1	1	6	0	6	0	3	4	0	5
GNS	P15586	N-acetylglucosamine-6-sulfatase OS=Homo sapiens GN=GNS PE=1 SV=3	N-acetylglucosamine-6-sulfatase	8	8	8	1	8	8	8	4	0	5	6	8	3	6	7	6	5	1	4	5	5	6	5	2	0	0	0	0	0	3	1	4	2	4	2	0	0	1	1	0	1	0	2	2	0	1
GOLGA7	Q7Z5G4	Golgin subfamily A member 7 OS=Homo sapiens GN=GOLGA7 PE=1 SV=2	Golgin subfamily A member 7	5	5	5	1	5	5	5	5	1	5	5	5	4	4	5	4	4	1	5	3	5	5	5	3	0	0	1	1	0	5	2	4	0	3	0	0	0	0	3	0	4	1	3	4	0	3
GOLGB1	Q14789	Golgin subfamily B member 1 OS=Homo sapiens GN=GOLGB1 PE=1 SV=2	Golgin subfamily B member 1	2	2	2	1	2	2	2	1	1	0	1	1	1	0	0	1	0	1	1	1	1	1	1	1	2	1	0	0	0	0	0	0	1	1	1	0	0	0	0	1	0	0	0	0	1	1
GOLIM4	O00461	Golgi integral membrane protein 4 OS=Homo sapiens GN=GOLIM4 PE=1 SV=1	Golgi integral membrane protein 4	2	2	2	1	2	2	2	0	0	0	0	0	1	1	0	2	1	0	1	0	1	1	1	0	0	0	0	0	0	0	0	0	0	0	0	0	0	0	1	0	0	0	1	1	0	1
GOT1	P17174	Aspartate aminotransferase, cytoplasmic OS=Homo sapiens GN=GOT1 PE=1 SV=3	Aspartate aminotransferase, cytoplasmic	15	15	15	1	15	15	15	9	0	12	11	11	4	11	10	8	10	3	11	10	9	8	6	5	0	0	0	1	0	6	3	5	2	4	1	0	1	2	2	0	8	1	2	2	0	1
GOT2	P00505	Aspartate aminotransferase, mitochondrial OS=Homo sapiens GN=GOT2 PE=1 SV=3	Aspartate aminotransferase, mitochondrial	3	3	3	1	3	3	3	2	0	3	2	3	2	3	3	3	3	1	2	2	3	1	2	1	0	0	0	0	0	2	1	2	1	0	2	0	0	0	1	0	2	0	2	2	0	1
GPC1	P35052	Glypican-1 OS=Homo sapiens GN=GPC1 PE=1 SV=2	Glypican-1;Secreted glypican-1	16	16	16	1	16	16	16	13	1	5	6	10	3	12	13	14	15	4	13	9	10	10	5	0	1	2	11	2	1	7	0	1	1	2	0	0	1	10	4	1	4	0	9	7	1	6
GPC6	Q9Y625	Glypican-6 OS=Homo sapiens GN=GPC6 PE=1 SV=1	Glypican-6;Secreted glypican-6	5;1	5;1	5;1	2	5	5	5	4	0	2	3	2	0	2	0	2	3	0	5	0	3	5	3	1	0	0	0	0	0	4	0	0	0	0	0	0	0	0	0	0	2	0	4	4	0	2
GPD2	P43304	Glycerol-3-phosphate dehydrogenase, mitochondrial OS=Homo sapiens GN=GPD2 PE=1 SV=3	Glycerol-3-phosphate dehydrogenase, mitochondrial	2	2	2	1	2	2	2	1	0	0	0	1	0	1	0	1	1	0	1	0	0	1	1	0	0	0	1	0	0	1	0	0	0	0	0	0	0	0	0	0	1	0	0	0	0	0
GPI	P06744	Glucose-6-phosphate isomerase OS=Homo sapiens GN=GPI PE=1 SV=4	Glucose-6-phosphate isomerase	20;1	20;1	16;1	2	20	20	16	13	0	18	18	16	11	16	11	14	15	2	16	9	11	13	9	8	2	1	2	0	0	12	2	12	7	12	5	1	0	2	7	0	10	0	7	5	0	4
GPNMB	Q14956	Transmembrane glycoprotein NMB OS=Homo sapiens GN=GPNMB PE=1 SV=2	Transmembrane glycoprotein NMB	2	2	2	1	2	2	2	2	2	2	2	2	2	2	1	2	2	2	2	2	2	2	2	2	0	1	1	1	1	2	2	2	0	1	1	0	0	0	2	1	1	0	2	2	1	2
GPRC5B	Q9NZH0	G-protein coupled receptor family C group 5 member B OS=Homo sapiens GN=GPRC5B PE=2 SV=2	G-protein coupled receptor family C group 5 member B	2	2	2	1	2	2	2	2	0	2	2	2	0	0	2	2	1	0	2	0	1	1	1	1	0	0	0	0	0	1	0	1	0	0	0	0	0	0	0	0	1	0	1	2	0	1
GRB2	P62993	Growth factor receptor-bound protein 2 OS=Homo sapiens GN=GRB2 PE=1 SV=1	Growth factor receptor-bound protein 2	10	10	10	1	10	10	10	4	0	3	1	2	2	6	8	8	7	1	4	5	5	5	5	1	0	0	1	0	0	2	0	2	2	1	2	0	1	4	3	0	3	1	2	2	0	1
GREM1	O60565	Gremlin-1 OS=Homo sapiens GN=GREM1 PE=1 SV=1	Gremlin-1	2	2	2	1	2	2	2	0	0	0	0	0	0	0	0	1	1	0	0	0	0	0	0	0	0	0	0	0	0	0	0	0	0	0	0	0	0	0	0	0	0	0	0	0	0	0
GRHPR	Q9UBQ7	Glyoxylate reductase/hydroxypyruvate reductase OS=Homo sapiens GN=GRHPR PE=1 SV=1	Glyoxylate reductase/hydroxypyruvate reductase	3	3	3	1	3	3	3	1	0	1	1	1	0	1	0	1	1	0	1	0	0	0	1	2	0	0	0	1	0	1	0	1	0	2	0	0	0	1	2	0	1	0	2	1	0	1
GRN	P28799	Granulins OS=Homo sapiens GN=GRN PE=1 SV=2	Granulins;Acrogranin;Paragranulin;Granulin-1;Granulin-2;Granulin-3;Granulin-4;Granulin-5;Granulin-6;Granulin-7	3	3	3	1	3	3	3	1	0	2	2	3	1	3	3	3	3	0	2	1	0	0	0	0	0	0	0	0	0	1	0	2	1	2	1	0	0	1	0	1	1	0	1	0	0	0
GRWD1	Q9BQ67	Glutamate-rich WD repeat-containing protein 1 OS=Homo sapiens GN=GRWD1 PE=1 SV=1	Glutamate-rich WD repeat-containing protein 1	3	3	3	1	3	3	3	0	0	3	2	1	1	1	1	3	2	0	0	1	0	1	1	0	0	0	0	0	0	0	0	1	0	1	0	0	0	0	0	0	0	0	0	0	0	0
GSDMA	Q96QA5	Gasdermin-A OS=Homo sapiens GN=GSDMA PE=1 SV=4	Gasdermin-A	11	11	11	1	11	11	11	9	6	9	9	9	4	9	9	7	8	7	9	6	7	7	7	10	4	5	5	5	6	10	6	7	2	5	4	2	0	4	5	6	10	2	6	7	3	8
GSN	P06396	Gelsolin OS=Homo sapiens GN=GSN PE=1 SV=1	Gelsolin	22	22	9	1	22	22	9	19	5	21	20	22	13	18	16	20	19	9	17	13	17	16	13	11	2	2	14	6	2	13	7	13	9	13	6	2	2	6	8	2	12	1	11	10	3	8
GSPT1	P15170	Eukaryotic peptide chain release factor GTP-binding subunit ERF3A OS=Homo sapiens GN=GSPT1 PE=1 SV=1;Eukaryotic peptide chain release factor GTP-binding subunit ERF3B OS=Homo sapiens GN=GSPT2 PE=1 SV=2	Eukaryotic peptide chain release factor GTP-binding subunit ERF3A;Eukaryotic peptide chain release factor GTP-binding subunit ERF3B	6;3	6;3	6;3	2	6	6	6	5	0	4	3	4	1	2	3	4	3	0	4	0	2	2	1	0	0	0	0	0	0	2	0	2	0	0	0	0	0	0	0	0	1	0	0	0	0	0
GSR	P00390	Glutathione reductase, mitochondrial OS=Homo sapiens GN=GSR PE=1 SV=2	Glutathione reductase, mitochondrial	3	3	3	1	3	3	3	2	1	2	2	2	0	2	1	1	2	0	2	0	1	1	1	0	0	0	0	0	0	1	0	0	0	0	0	0	0	0	1	0	0	0	1	0	0	1
GSS	P48637	Glutathione synthetase OS=Homo sapiens GN=GSS PE=1 SV=1	Glutathione synthetase	8	8	8	1	8	8	8	7	1	6	7	6	2	6	5	2	5	3	7	4	5	7	5	4	0	0	1	1	0	7	3	1	0	0	0	0	0	0	4	1	6	0	4	3	0	3
GSTM2	P28161	Glutathione S-transferase Mu 2 OS=Homo sapiens GN=GSTM2 PE=1 SV=2	Glutathione S-transferase Mu 2	4;1;1	3;1;1	3;1;1	3	4	3	3	4	2	3	4	4	2	4	3	3	4	2	3	2	2	2	2	2	0	0	1	0	0	3	0	2	1	1	1	0	0	0	2	0	2	0	3	2	0	2
GSTM3	P21266	Glutathione S-transferase Mu 3 OS=Homo sapiens GN=GSTM3 PE=1 SV=3	Glutathione S-transferase Mu 3	14;1	14;1	13;0	2	14	14	13	10	1	13	10	11	2	13	10	13	12	1	10	6	5	7	5	1	0	0	0	0	0	4	0	4	2	4	2	0	0	1	5	0	4	0	4	2	0	1
GSTO1	P78417	Glutathione S-transferase omega-1 OS=Homo sapiens GN=GSTO1 PE=1 SV=2	Glutathione S-transferase omega-1	7	7	7	1	7	7	7	4	0	6	6	6	4	3	5	5	5	1	4	2	4	4	4	2	0	0	2	0	0	3	0	3	2	3	1	0	0	0	3	0	3	0	3	2	0	3
GSTP1	P09211	Glutathione S-transferase P OS=Homo sapiens GN=GSTP1 PE=1 SV=2	Glutathione S-transferase P	13	13	13	1	13	13	13	12	2	12	10	11	3	11	8	11	11	5	11	9	10	10	7	5	2	2	2	0	2	9	4	7	4	5	3	2	1	2	3	1	7	1	7	8	2	8
GTPBP4	Q9BZE4	Nucleolar GTP-binding protein 1 OS=Homo sapiens GN=GTPBP4 PE=1 SV=3	Nucleolar GTP-binding protein 1	5	5	5	1	5	5	5	0	0	0	1	1	0	1	1	5	3	0	0	0	0	0	0	0	0	0	0	0	0	0	0	0	0	0	0	0	0	0	0	0	0	0	0	0	0	0
GYG1	P46976	Glycogenin-1 OS=Homo sapiens GN=GYG1 PE=1 SV=4	Glycogenin-1	2	2	2	1	2	2	2	1	0	1	2	1	0	2	2	2	1	0	2	1	1	1	1	0	0	0	0	0	0	2	0	0	0	0	0	0	0	0	1	0	0	0	0	1	0	1
GYS1	P13807	Glycogen [starch] synthase, muscle OS=Homo sapiens GN=GYS1 PE=1 SV=2	Glycogen [starch] synthase, muscle	2	2	2	1	2	2	2	1	0	1	1	1	0	1	1	1	1	0	0	0	1	1	0	0	0	0	0	0	0	0	0	1	0	0	0	0	0	0	0	0	0	0	0	0	0	0
H1F0	P07305	Histone H1.0 OS=Homo sapiens GN=H1F0 PE=1 SV=3	Histone H1.0;Histone H1.0, N-terminally processed	4	4	4	1	4	4	4	0	0	1	0	0	0	1	1	2	2	0	0	1	0	0	0	0	0	0	0	0	0	0	0	0	0	0	0	0	0	1	1	0	0	0	0	0	0	0
H2AFV	Q71UI9	Histone H2A.V OS=Homo sapiens GN=H2AFV PE=1 SV=3;Histone H2A.Z OS=Homo sapiens GN=H2AFZ PE=1 SV=2	Histone H2A.V;Histone H2A.Z	5;5	3;3	3;3	2	5	3	3	2	1	1	3	2	1	3	3	5	5	1	2	3	2	2	1	2	0	0	3	2	0	2	1	1	1	1	0	0	0	4	2	0	2	1	2	2	0	2
H2AFY	O75367	Core histone macro-H2A.1 OS=Homo sapiens GN=H2AFY PE=1 SV=4	Core histone macro-H2A.1	11	11	9	1	11	11	9	3	0	2	2	1	0	0	0	11	10	0	1	0	0	0	0	0	0	0	1	0	0	0	0	0	0	1	0	0	0	2	2	0	0	0	0	0	0	0
HABP2	Q14520	Hyaluronan-binding protein 2 OS=Homo sapiens GN=HABP2 PE=1 SV=1	Hyaluronan-binding protein 2;Hyaluronan-binding protein 2 50 kDa heavy chain;Hyaluronan-binding protein 2 50 kDa heavy chain alternate form;Hyaluronan-binding protein 2 27 kDa light chain;Hyaluronan-binding protein 2 27 kDa light chain alternate form	2	2	2	1	2	2	2	0	0	0	0	0	0	1	2	2	2	0	0	0	0	0	0	0	0	0	2	1	0	0	0	0	0	0	0	0	0	0	1	0	0	0	0	0	0	0
HACD3	Q9P035	Very-long-chain (3R)-3-hydroxyacyl-CoA dehydratase 3 OS=Homo sapiens GN=PTPLAD1 PE=1 SV=2	Very-long-chain (3R)-3-hydroxyacyl-CoA dehydratase 3	5	5	5	1	5	5	5	4	0	4	4	4	1	4	3	4	4	2	3	3	3	3	2	1	0	0	0	0	0	3	0	2	1	1	0	0	0	0	1	0	2	0	3	2	0	3
HADHA	P40939	Trifunctional enzyme subunit alpha, mitochondrial OS=Homo sapiens GN=HADHA PE=1 SV=2	Trifunctional enzyme subunit alpha, mitochondrial;Long-chain enoyl-CoA hydratase;Long chain 3-hydroxyacyl-CoA dehydrogenase	4	4	4	1	4	4	4	4	0	0	0	1	0	3	2	3	3	0	2	1	0	1	2	1	0	0	1	0	0	4	0	0	0	1	0	0	0	0	0	0	3	0	0	1	0	1
HADHB	P55084	Trifunctional enzyme subunit beta, mitochondrial OS=Homo sapiens GN=HADHB PE=1 SV=3	Trifunctional enzyme subunit beta, mitochondrial;3-ketoacyl-CoA thiolase	3	3	3	1	3	3	3	2	0	0	0	0	0	3	3	3	3	0	0	0	1	1	2	0	0	0	0	0	0	2	0	1	0	0	0	0	0	0	1	0	0	0	0	0	0	0
HAL	P42357	Histidine ammonia-lyase OS=Homo sapiens GN=HAL PE=1 SV=1	Histidine ammonia-lyase	9	9	9	1	9	9	9	8	7	6	8	7	4	8	8	6	7	7	9	8	7	8	7	7	2	2	7	2	2	9	7	4	1	4	2	0	1	2	5	3	8	1	5	6	1	7
HARS	P12081	Histidine--tRNA ligase, cytoplasmic OS=Homo sapiens GN=HARS PE=1 SV=2;Probable histidine--tRNA ligase, mitochondrial OS=Homo sapiens GN=HARS2 PE=1 SV=1	Histidine--tRNA ligase, cytoplasmic;Probable histidine--tRNA ligase, mitochondrial	6;3	6;3	6;3	2	6	6	6	5	0	6	5	6	3	4	5	6	5	2	5	3	5	4	5	4	0	0	1	0	0	5	3	1	0	1	0	0	1	0	5	0	4	0	4	4	1	4
HAS2	Q92819	Hyaluronan synthase 2 OS=Homo sapiens GN=HAS2 PE=2 SV=1	Hyaluronan synthase 2	4	4	4	1	4	4	4	2	0	0	0	0	0	0	0	0	0	0	4	0	3	3	4	1	0	0	0	0	0	4	0	0	0	0	0	0	0	0	0	0	2	0	2	1	0	2
HAT1	O14929	Histone acetyltransferase type B catalytic subunit OS=Homo sapiens GN=HAT1 PE=1 SV=1	Histone acetyltransferase type B catalytic subunit	2	2	2	1	2	2	2	0	0	2	2	2	1	2	2	2	2	0	0	0	0	0	0	0	0	0	0	0	0	0	0	1	0	1	0	0	0	0	2	0	0	0	0	0	0	0
HBA1	P69905	Hemoglobin subunit alpha OS=Homo sapiens GN=HBA1 PE=1 SV=2	Hemoglobin subunit alpha	6	2	2	1	6	2	2	4	3	4	4	5	3	4	4	4	5	4	5	5	4	4	4	5	2	3	5	4	3	5	3	2	2	2	2	2	3	3	5	2	5	2	4	5	3	5
HBB	P68871	Hemoglobin subunit beta OS=Homo sapiens GN=HBB PE=1 SV=2;Hemoglobin subunit delta OS=Homo sapiens GN=HBD PE=1 SV=2	Hemoglobin subunit beta;LVV-hemorphin-7;Spinorphin;Hemoglobin subunit delta	8;5	6;3	6;3	2	8	6	6	6	2	5	6	5	3	6	4	5	6	5	6	6	4	6	6	5	2	2	5	4	3	6	4	3	1	3	1	1	2	2	6	1	6	1	5	5	2	5
HBS1L	Q9Y450	HBS1-like protein OS=Homo sapiens GN=HBS1L PE=1 SV=1	HBS1-like protein	2	2	2	1	2	2	2	1	0	1	1	1	0	1	2	2	2	0	1	0	2	1	0	0	0	0	0	0	0	0	0	0	0	0	0	1	0	0	2	0	0	0	0	1	0	0
HDAC1	Q13547	Histone deacetylase 1 OS=Homo sapiens GN=HDAC1 PE=1 SV=1	Histone deacetylase 1	6;1	6;1	3;0	2	6	6	3	1	0	5	3	5	2	4	5	6	5	0	0	2	0	0	0	0	0	0	0	0	0	0	0	4	0	1	0	0	0	0	1	0	1	0	0	0	0	0
HDAC2	Q92769	Histone deacetylase 2 OS=Homo sapiens GN=HDAC2 PE=1 SV=2	Histone deacetylase 2	5	2	2	1	5	2	2	1	0	3	2	3	1	3	3	5	5	0	0	2	0	0	0	0	1	0	0	0	0	0	0	3	0	1	0	0	0	1	1	0	0	0	0	0	0	0
HDGF	P51858	Hepatoma-derived growth factor OS=Homo sapiens GN=HDGF PE=1 SV=1	Hepatoma-derived growth factor	2	2	2	1	2	2	2	0	0	2	2	2	0	1	0	2	0	0	0	0	0	0	0	0	0	0	0	0	0	0	0	0	0	0	1	0	0	0	0	0	0	0	0	0	0	0
HDLBP	Q00341	Vigilin OS=Homo sapiens GN=HDLBP PE=1 SV=2	Vigilin	10	10	10	1	10	10	10	7	0	8	7	6	0	6	7	10	7	1	7	0	4	5	2	1	0	0	0	0	0	2	0	1	0	0	0	0	0	0	2	0	1	0	2	1	1	1
HEATR1	Q9H583	HEAT repeat-containing protein 1 OS=Homo sapiens GN=HEATR1 PE=1 SV=3	HEAT repeat-containing protein 1;HEAT repeat-containing protein 1, N-terminally processed	4	4	4	1	4	4	4	1	0	1	1	1	0	1	1	4	3	0	1	0	1	1	1	0	0	0	0	0	0	1	0	0	0	0	0	0	0	0	0	0	0	0	0	0	0	0
HEBP1	Q9NRV9	Heme-binding protein 1 OS=Homo sapiens GN=HEBP1 PE=1 SV=1	Heme-binding protein 1	8	8	8	1	8	8	8	7	0	7	7	7	4	7	6	5	3	0	6	0	6	6	4	2	1	0	0	0	0	6	0	4	3	3	1	1	0	0	1	0	2	1	3	5	0	1
HEBP2	Q9Y5Z4	Heme-binding protein 2 OS=Homo sapiens GN=HEBP2 PE=1 SV=1	Heme-binding protein 2	6	6	6	1	6	6	6	5	1	5	5	5	3	3	2	3	3	1	5	2	4	3	4	2	0	0	0	1	0	3	2	1	1	1	0	0	0	0	2	0	3	0	4	3	0	2
HEG1	Q9ULI3	Protein HEG homolog 1 OS=Homo sapiens GN=HEG1 PE=1 SV=3	Protein HEG homolog 1	6	6	6	1	6	6	6	5	0	2	1	4	0	1	0	2	1	0	6	0	5	6	5	1	0	0	3	0	0	6	0	1	0	0	0	0	0	0	0	0	3	0	2	2	0	1
HEXA	P06865	Beta-hexosaminidase subunit alpha OS=Homo sapiens GN=HEXA PE=1 SV=2	Beta-hexosaminidase subunit alpha	7	7	7	1	7	7	7	6	1	4	5	6	2	5	6	6	6	2	5	2	6	6	4	2	0	2	0	0	0	4	3	2	0	1	2	0	1	1	1	1	1	0	3	2	0	2
HEXB	P07686	Beta-hexosaminidase subunit beta OS=Homo sapiens GN=HEXB PE=1 SV=3	Beta-hexosaminidase subunit beta;Beta-hexosaminidase subunit beta chain B;Beta-hexosaminidase subunit beta chain A	15	15	15	1	15	15	15	14	3	14	12	15	5	15	10	12	14	3	14	8	13	12	10	8	0	2	2	4	0	11	4	2	2	4	1	0	0	0	7	0	11	2	9	9	0	7
HGS	O14964	Hepatocyte growth factor-regulated tyrosine kinase substrate OS=Homo sapiens GN=HGS PE=1 SV=1	Hepatocyte growth factor-regulated tyrosine kinase substrate	2	2	2	1	2	2	2	1	0	0	0	0	0	0	0	1	0	0	0	0	2	2	1	1	0	0	0	0	0	0	0	0	0	0	0	0	0	1	0	0	1	0	1	0	0	0
HINT1	P49773	Histidine triad nucleotide-binding protein 1 OS=Homo sapiens GN=HINT1 PE=1 SV=2	Histidine triad nucleotide-binding protein 1	3	3	3	1	3	3	3	3	0	3	3	3	1	3	1	1	0	0	3	0	2	1	2	0	0	0	0	0	0	0	0	2	0	1	0	0	0	1	2	0	0	0	2	1	0	0
HIST1H1B	P16401	Histone H1.5 OS=Homo sapiens GN=HIST1H1B PE=1 SV=3	Histone H1.5	6	6	6	1	6	6	6	0	0	1	0	0	0	0	1	5	6	1	0	1	0	0	0	0	0	0	1	0	1	0	0	0	0	1	0	0	0	1	1	0	0	0	0	0	0	0
HIST1H1C	P16403	Histone H1.2 OS=Homo sapiens GN=HIST1H1C PE=1 SV=2;Histone H1.4 OS=Homo sapiens GN=HIST1H1E PE=1 SV=2;Histone H1.3 OS=Homo sapiens GN=HIST1H1D PE=1 SV=2;Histone H1t OS=Homo sapiens GN=HIST1H1T PE=2 SV=4;Histone H1.1 OS=Homo sapiens GN=HIST1H1A PE=1 SV=3	Histone H1.2;Histone H1.4;Histone H1.3;Histone H1t;Histone H1.1	6;6;6;3;3	6;6;6;3;3	6;6;6;3;3	5	6	6	6	1	0	1	2	1	1	1	2	6	5	0	0	0	0	1	0	0	0	0	0	0	1	0	0	1	1	1	1	1	0	2	1	0	0	0	2	2	0	0
HIST1H2AJ	Q99878	Histone H2A type 1-J OS=Homo sapiens GN=HIST1H2AJ PE=1 SV=3;Histone H2A type 1-H OS=Homo sapiens GN=HIST1H2AH PE=1 SV=3;Histone H2A.J OS=Homo sapiens GN=H2AFJ PE=1 SV=1;Histone H2A type 2-C OS=Homo sapiens GN=HIST2H2AC PE=1 SV=4;Histone H2A type 2-A OS=Hom	Histone H2A type 1-J;Histone H2A type 1-H;Histone H2A.J;Histone H2A type 2-C;Histone H2A type 2-A;Histone H2A type 1-D;Histone H2A type 1	5;5;5;5;5;5;5	5;5;5;5;5;5;5	1;1;1;1;1;1;1	7	5	5	1	4	1	2	2	3	1	4	4	5	5	3	4	4	3	3	2	3	0	0	4	2	0	3	3	1	0	2	1	1	0	4	4	0	3	1	4	4	0	4
HIST1H2BL	Q99880	Histone H2B type 1-L OS=Homo sapiens GN=HIST1H2BL PE=1 SV=3;Histone H2B type 1-M OS=Homo sapiens GN=HIST1H2BM PE=1 SV=3;Histone H2B type 1-N OS=Homo sapiens GN=HIST1H2BN PE=1 SV=3;Histone H2B type 1-H OS=Homo sapiens GN=HIST1H2BH PE=1 SV=3;Histone H2B type	Histone H2B type 1-L;Histone H2B type 1-M;Histone H2B type 1-N;Histone H2B type 1-H;Histone H2B type 2-F;Histone H2B type 1-C/E/F/G/I;Histone H2B type 1-D;Histone H2B type 1-K;Histone H2B type F-S;Histone H2B type 1-A	8;8;8;8;8;8;8;8;7;4	8;8;8;8;8;8;8;8;7;4	2;2;2;2;2;2;2;2;2;0	10	8	8	2	6	3	6	6	5	3	6	6	6	6	5	5	6	5	5	5	6	1	2	6	5	3	5	4	3	2	3	1	2	3	7	6	2	6	0	3	3	0	4
HIST1H4A	P62805	Histone H4 OS=Homo sapiens GN=HIST1H4A PE=1 SV=2	Histone H4	10	10	10	1	10	10	10	8	2	5	6	3	1	8	7	10	10	4	4	5	4	3	3	5	0	1	6	2	0	6	1	0	2	2	1	0	1	8	8	3	6	0	4	4	0	4
HIST2H2BE	Q16778	Histone H2B type 2-E OS=Homo sapiens GN=HIST2H2BE PE=1 SV=3;Histone H2B type 1-B OS=Homo sapiens GN=HIST1H2BB PE=1 SV=2;Histone H2B type 1-O OS=Homo sapiens GN=HIST1H2BO PE=1 SV=3;Histone H2B type 1-J OS=Homo sapiens GN=HIST1H2BJ PE=1 SV=3;Histone H2B type	Histone H2B type 2-E;Histone H2B type 1-B;Histone H2B type 1-O;Histone H2B type 1-J;Histone H2B type 3-B	8;8;8;8;7;3;3	2;2;2;2;2;2;2	2;2;2;2;2;2;2	7	8	2	2	6	3	6	5	6	3	6	6	6	6	4	5	6	4	5	3	6	1	1	5	3	3	5	6	3	2	3	1	1	2	7	6	2	5	0	3	3	0	4
HIST2H3A	Q71DI3	Histone H3.2 OS=Homo sapiens GN=HIST2H3A PE=1 SV=3;Histone H3.3 OS=Homo sapiens GN=H3F3A PE=1 SV=2;Histone H3.1 OS=Homo sapiens GN=HIST1H3A PE=1 SV=2;Histone H3.3C OS=Homo sapiens GN=H3F3C PE=1 SV=3;Histone H3.1t OS=Homo sapiens GN=HIST3H3 PE=1 SV=3	Histone H3.2;Histone H3.3;Histone H3.1;Histone H3.3C;Histone H3.1t	5;5;5;3;3	5;5;5;3;3	5;5;5;3;3	5	5	5	5	3	1	3	0	2	1	1	4	5	4	2	1	2	1	1	1	1	1	1	4	3	0	2	2	2	1	2	2	1	1	3	3	1	2	0	1	1	1	2
HK1	P19367	Hexokinase-1 OS=Homo sapiens GN=HK1 PE=1 SV=3	Hexokinase-1	2	2	2	1	2	2	2	1	0	1	1	1	0	1	1	2	1	0	2	2	2	2	1	0	0	0	1	0	0	2	1	0	0	0	0	0	0	0	0	0	2	0	0	0	0	1
HLA-A	P10316	HLA class I histocompatibility antigen, A-69 alpha chain OS=Homo sapiens GN=HLA-A PE=1 SV=2;HLA class I histocompatibility antigen, A-68 alpha chain OS=Homo sapiens GN=HLA-A PE=1 SV=4	HLA class I histocompatibility antigen, A-69 alpha chain;HLA class I histocompatibility antigen, A-68 alpha chain	11;8	11;8	0;0	2	11	11	0	11	1	8	8	10	5	8	6	8	7	0	11	3	10	8	8	5	0	0	6	2	0	9	0	2	2	4	0	0	0	0	4	0	8	0	9	7	1	9
HLA-A	P30457	HLA class I histocompatibility antigen, A-66 alpha chain OS=Homo sapiens GN=HLA-A PE=1 SV=1;HLA class I histocompatibility antigen, A-34 alpha chain OS=Homo sapiens GN=HLA-A PE=1 SV=1;HLA class I histocompatibility antigen, A-33 alpha chain OS=Homo sapiens	HLA class I histocompatibility antigen, A-66 alpha chain;HLA class I histocompatibility antigen, A-34 alpha chain;HLA class I histocompatibility antigen, A-33 alpha chain;HLA class I histocompatibility antigen, A-26 alpha chain;HLA class I histocompatibility antigen, A-25 alpha chain;HLA class I histocompatibility antigen, A-74 alpha chain;HLA class I histocompatibility antigen, A-31 alpha chain;…	8;8;7;7;7;7;7;6	2;2;2;2;2;2;2;2	0;0;0;0;0;0;0;0	8	8	2	0	8	1	5	7	8	4	7	6	6	6	0	8	3	7	7	7	5	0	0	5	1	0	7	0	3	2	2	0	0	0	0	2	0	7	0	7	6	1	7
HLA-A	P30512	HLA class I histocompatibility antigen, A-29 alpha chain OS=Homo sapiens GN=HLA-A PE=1 SV=2;HLA class I histocompatibility antigen, A-43 alpha chain OS=Homo sapiens GN=HLA-A PE=1 SV=1	HLA class I histocompatibility antigen, A-29 alpha chain;HLA class I histocompatibility antigen, A-43 alpha chain	8;7	2;1	1;1	2	8	2	1	8	1	5	7	8	3	6	6	5	4	0	8	3	6	8	7	4	0	0	4	1	0	7	0	2	1	1	0	0	0	0	1	0	6	0	7	6	1	6
HLA-B	P01889	HLA class I histocompatibility antigen, B-7 alpha chain OS=Homo sapiens GN=HLA-B PE=1 SV=3;HLA class I histocompatibility antigen, B-42 alpha chain OS=Homo sapiens GN=HLA-B PE=1 SV=1;HLA class I histocompatibility antigen, B-8 alpha chain OS=Homo sapiens G	HLA class I histocompatibility antigen, B-7 alpha chain;HLA class I histocompatibility antigen, B-42 alpha chain;HLA class I histocompatibility antigen, B-8 alpha chain;HLA class I histocompatibility antigen, B-81 alpha chain;HLA class I histocompatibility antigen, B-48 alpha chain;HLA class I histocompatibility antigen, B-14 alpha chain	9;6;6;5;5;5;4;4;3;3;2	8;5;5;4;4;4;3;3;3;3;2	2;0;0;0;0;0;0;0;0;0;0	11	9	8	2	9	3	9	7	9	4	8	5	9	7	3	9	3	8	8	4	4	2	0	3	1	0	7	0	4	3	5	2	0	0	2	3	2	6	0	8	8	2	6
HLA-G	P17693	HLA class I histocompatibility antigen, alpha chain G OS=Homo sapiens GN=HLA-G PE=1 SV=1	HLA class I histocompatibility antigen, alpha chain G	3	2	2	1	3	2	2	2	1	2	2	2	1	2	2	2	2	1	3	2	3	3	3	2	1	0	1	0	0	2	0	1	1	2	0	0	0	1	2	1	2	0	2	2	0	2
HM13	Q8TCT9	Minor histocompatibility antigen H13 OS=Homo sapiens GN=HM13 PE=1 SV=1	Minor histocompatibility antigen H13	3	3	3	1	3	3	3	3	0	3	2	3	1	2	2	3	3	2	2	2	2	3	2	1	0	0	1	0	0	3	1	0	1	0	0	1	0	1	2	0	3	1	2	3	0	3
HMGA1	P17096	High mobility group protein HMG-I/HMG-Y OS=Homo sapiens GN=HMGA1 PE=1 SV=3	High mobility group protein HMG-I/HMG-Y	2	2	2	1	2	2	2	0	0	0	0	1	0	0	0	2	2	0	0	0	0	0	0	0	0	0	0	0	0	0	0	0	0	0	0	0	0	0	0	0	0	0	0	0	0	0
HMGB1	P09429	High mobility group protein B1 OS=Homo sapiens GN=HMGB1 PE=1 SV=3;Putative high mobility group protein B1-like 1 OS=Homo sapiens GN=HMGB1P1 PE=5 SV=1	High mobility group protein B1;Putative high mobility group protein B1-like 1	2;1	2;1	2;1	2	2	2	2	0	0	2	1	2	0	2	0	2	1	0	0	0	0	0	0	0	0	0	0	0	0	0	0	0	0	0	0	0	0	0	0	0	0	0	0	0	0	0
HMOX2	P30519	Heme oxygenase 2 OS=Homo sapiens GN=HMOX2 PE=1 SV=2	Heme oxygenase 2	2	2	2	1	2	2	2	1	0	2	2	2	0	1	1	2	2	0	2	1	2	2	1	0	0	0	0	0	0	2	0	1	0	0	0	0	0	1	0	0	1	0	0	0	0	0
HN1L	Q9H910	Hematological and neurological expressed 1-like protein OS=Homo sapiens GN=HN1L PE=1 SV=1	Hematological and neurological expressed 1-like protein	2	2	2	1	2	2	2	1	0	2	2	2	2	2	2	2	2	0	1	1	1	1	0	0	0	0	0	0	0	0	0	1	0	1	0	0	0	0	1	0	0	0	2	2	0	1
HNRNPA0	Q13151	Heterogeneous nuclear ribonucleoprotein A0 OS=Homo sapiens GN=HNRNPA0 PE=1 SV=1	Heterogeneous nuclear ribonucleoprotein A0	3	3	3	1	3	3	3	1	0	2	3	3	0	2	1	3	3	0	0	1	0	0	0	0	0	0	0	0	0	0	0	1	0	1	0	0	0	0	1	0	0	0	0	0	0	0
HNRNPA1	P09651	Heterogeneous nuclear ribonucleoprotein A1 OS=Homo sapiens GN=HNRNPA1 PE=1 SV=5;Heterogeneous nuclear ribonucleoprotein A1-like 2 OS=Homo sapiens GN=HNRNPA1L2 PE=2 SV=2	Heterogeneous nuclear ribonucleoprotein A1;Heterogeneous nuclear ribonucleoprotein A1, N-terminally processed;Heterogeneous nuclear ribonucleoprotein A1-like 2	9;6	9;6	9;6	2	9	9	9	6	0	9	9	8	4	7	8	8	8	2	4	5	3	2	1	0	0	0	0	2	1	3	1	4	1	5	0	0	0	1	2	1	2	0	4	3	0	2
HNRNPA2B1	P22626	Heterogeneous nuclear ribonucleoproteins A2/B1 OS=Homo sapiens GN=HNRNPA2B1 PE=1 SV=2	Heterogeneous nuclear ribonucleoproteins A2/B1	8	8	8	1	8	8	8	3	0	8	8	8	4	8	6	8	8	3	2	1	0	1	0	0	0	0	0	0	0	1	0	4	0	3	1	0	0	0	2	0	0	0	2	2	0	1
HNRNPA3	P51991	Heterogeneous nuclear ribonucleoprotein A3 OS=Homo sapiens GN=HNRNPA3 PE=1 SV=2	Heterogeneous nuclear ribonucleoprotein A3	5	5	5	1	5	5	5	2	1	4	4	4	2	3	4	5	5	0	0	0	0	0	0	1	0	0	0	0	0	2	0	2	1	2	2	0	0	2	0	0	0	0	0	0	0	2
HNRNPC	P07910	Heterogeneous nuclear ribonucleoproteins C1/C2 OS=Homo sapiens GN=HNRNPC PE=1 SV=4	Heterogeneous nuclear ribonucleoproteins C1/C2	11;5;5;5;5;1	11;5;5;5;5;1	11;5;5;5;5;1	6	11	11	11	8	0	9	7	9	3	7	7	10	10	3	3	7	4	3	4	0	1	1	0	0	0	2	1	6	1	0	4	1	1	2	4	0	3	0	0	0	0	0
HNRNPD	Q14103	Heterogeneous nuclear ribonucleoprotein D0 OS=Homo sapiens GN=HNRNPD PE=1 SV=1	Heterogeneous nuclear ribonucleoprotein D0	5	5	5	1	5	5	5	2	0	5	5	3	3	4	4	5	4	0	2	3	1	2	0	0	0	0	0	0	0	0	0	4	1	2	0	0	0	0	2	0	0	0	0	0	0	0
HNRNPF	P52597	Heterogeneous nuclear ribonucleoprotein F OS=Homo sapiens GN=HNRNPF PE=1 SV=3	Heterogeneous nuclear ribonucleoprotein F;Heterogeneous nuclear ribonucleoprotein F, N-terminally processed	7	5	5	1	7	5	5	4	0	5	5	4	1	5	5	7	6	2	4	5	2	2	1	2	0	0	0	0	0	2	0	4	0	3	1	0	0	1	5	0	1	0	2	2	0	1
HNRNPH1	P31943	Heterogeneous nuclear ribonucleoprotein H OS=Homo sapiens GN=HNRNPH1 PE=1 SV=4	Heterogeneous nuclear ribonucleoprotein H;Heterogeneous nuclear ribonucleoprotein H, N-terminally processed	9	9	4	1	9	9	4	6	0	8	6	7	2	8	7	8	8	3	2	5	2	2	2	2	0	0	1	1	0	3	0	5	1	3	2	0	0	2	6	0	3	0	2	2	0	4
HNRNPH2	P55795	Heterogeneous nuclear ribonucleoprotein H2 OS=Homo sapiens GN=HNRNPH2 PE=1 SV=1	Heterogeneous nuclear ribonucleoprotein H2	7	3	3	1	7	3	3	6	0	7	6	7	2	6	5	7	7	3	1	5	2	2	2	1	0	0	0	1	0	2	0	4	1	3	1	0	0	1	4	0	1	0	1	1	0	2
HNRNPH3	P31942	Heterogeneous nuclear ribonucleoprotein H3 OS=Homo sapiens GN=HNRNPH3 PE=1 SV=2	Heterogeneous nuclear ribonucleoprotein H3	7	7	7	1	7	7	7	4	0	5	5	5	2	4	4	6	5	2	2	3	2	3	3	1	0	0	0	0	0	3	0	4	1	4	2	1	1	3	4	0	3	0	2	2	0	1
HNRNPK	P61978	Heterogeneous nuclear ribonucleoprotein K OS=Homo sapiens GN=HNRNPK PE=1 SV=1	Heterogeneous nuclear ribonucleoprotein K	15	15	15	1	15	15	15	9	0	15	10	15	5	11	11	14	15	3	5	8	4	5	7	3	1	1	1	1	0	2	3	4	4	6	0	0	0	4	6	0	3	1	1	2	0	0
HNRNPL	P14866	Heterogeneous nuclear ribonucleoprotein L OS=Homo sapiens GN=HNRNPL PE=1 SV=2	Heterogeneous nuclear ribonucleoprotein L	11	11	11	1	11	11	11	3	0	6	6	5	1	3	4	10	8	1	0	2	1	0	0	0	0	0	0	0	0	0	0	2	0	3	0	0	0	0	2	0	0	0	0	0	0	1
HNRNPM	P52272	Heterogeneous nuclear ribonucleoprotein M OS=Homo sapiens GN=HNRNPM PE=1 SV=3	Heterogeneous nuclear ribonucleoprotein M	22	22	22	1	22	22	22	5	2	7	9	9	2	11	6	21	16	3	1	7	1	2	4	0	0	1	2	2	0	2	0	9	1	5	0	1	0	4	7	0	2	0	3	2	0	1
HNRNPR	O43390	Heterogeneous nuclear ribonucleoprotein R OS=Homo sapiens GN=HNRNPR PE=1 SV=1	Heterogeneous nuclear ribonucleoprotein R	8	4	4	1	8	4	4	2	1	6	7	7	2	6	4	8	7	2	1	3	1	1	1	0	0	0	0	0	0	2	0	3	2	1	0	0	0	1	2	0	0	0	0	0	1	1
HNRNPU	Q00839	Heterogeneous nuclear ribonucleoprotein U OS=Homo sapiens GN=HNRNPU PE=1 SV=6	Heterogeneous nuclear ribonucleoprotein U	14	14	14	1	14	14	14	6	0	7	4	6	2	5	4	13	10	2	3	4	1	1	0	0	0	0	1	2	0	3	2	6	1	4	1	0	0	1	4	0	1	0	1	1	0	1
HNRNPUL1	Q9BUJ2	Heterogeneous nuclear ribonucleoprotein U-like protein 1 OS=Homo sapiens GN=HNRNPUL1 PE=1 SV=2	Heterogeneous nuclear ribonucleoprotein U-like protein 1	3	3	3	1	3	3	3	0	0	1	0	1	0	1	1	3	2	0	0	1	0	0	0	0	0	0	0	0	0	0	0	0	0	0	0	0	0	0	0	0	0	0	0	0	0	0
HNRNPUL2	Q1KMD3	Heterogeneous nuclear ribonucleoprotein U-like protein 2 OS=Homo sapiens GN=HNRNPUL2 PE=1 SV=1	Heterogeneous nuclear ribonucleoprotein U-like protein 2	2	2	2	1	2	2	2	0	1	1	0	0	0	0	1	2	2	0	0	1	0	0	0	0	0	0	0	0	0	0	0	1	0	0	0	0	0	0	1	0	0	0	0	0	0	0
HP	P00738	Haptoglobin OS=Homo sapiens GN=HP PE=1 SV=1;Haptoglobin-related protein OS=Homo sapiens GN=HPR PE=1 SV=2	Haptoglobin;Haptoglobin alpha chain;Haptoglobin beta chain;Haptoglobin-related protein	8;5	8;5	8;5	2	8	8	8	1	1	2	0	1	0	0	0	1	1	0	0	0	0	0	0	0	1	0	4	3	0	0	0	2	0	0	0	0	0	0	1	0	0	0	1	1	0	2
HP1BP3	Q5SSJ5	Heterochromatin protein 1-binding protein 3 OS=Homo sapiens GN=HP1BP3 PE=1 SV=1	Heterochromatin protein 1-binding protein 3	4	4	4	1	4	4	4	0	0	0	0	0	0	0	0	4	4	0	0	0	0	0	0	0	0	0	0	0	0	0	1	0	0	0	0	0	0	1	1	1	0	0	1	0	1	0
HPRT1	P00492	Hypoxanthine-guanine phosphoribosyltransferase OS=Homo sapiens GN=HPRT1 PE=1 SV=2	Hypoxanthine-guanine phosphoribosyltransferase	2	2	2	1	2	2	2	1	0	2	2	2	1	2	1	2	2	1	1	0	2	2	2	1	0	0	1	0	0	2	2	1	1	1	1	0	0	0	2	0	2	0	2	2	0	1
HRAS	P01112	GTPase HRas OS=Homo sapiens GN=HRAS PE=1 SV=1	GTPase HRas;GTPase HRas, N-terminally processed	7	3	2	1	7	3	2	7	0	7	7	7	4	6	3	4	5	0	7	2	6	6	6	4	1	2	2	0	0	6	1	4	2	2	1	0	0	1	3	0	5	0	6	6	0	5
HSD17B10	Q99714	3-hydroxyacyl-CoA dehydrogenase type-2 OS=Homo sapiens GN=HSD17B10 PE=1 SV=3	3-hydroxyacyl-CoA dehydrogenase type-2	2	2	2	1	2	2	2	2	0	1	0	1	0	1	2	2	2	0	0	0	0	0	0	0	0	0	0	0	0	1	0	0	0	0	0	0	0	0	0	0	0	0	0	0	0	0
HSD17B12	Q53GQ0	Estradiol 17-beta-dehydrogenase 12 OS=Homo sapiens GN=HSD17B12 PE=1 SV=2	Very-long-chain 3-oxoacyl-CoA reductase	4	4	4	1	4	4	4	4	0	3	3	3	1	2	2	3	2	0	3	2	2	2	0	1	0	0	1	0	0	3	0	1	0	1	0	0	0	0	1	0	2	0	1	1	0	0
HSD17B4	P51659	Peroxisomal multifunctional enzyme type 2 OS=Homo sapiens GN=HSD17B4 PE=1 SV=3	Peroxisomal multifunctional enzyme type 2;(3R)-hydroxyacyl-CoA dehydrogenase;Enoyl-CoA hydratase 2	8	8	8	1	8	8	8	6	1	4	5	5	3	6	5	7	7	6	5	5	4	5	5	4	1	1	1	1	0	6	3	1	0	2	2	0	1	1	3	1	7	0	2	2	0	2
HSP90AA1	P07900	Heat shock protein HSP 90-alpha OS=Homo sapiens GN=HSP90AA1 PE=1 SV=5	Heat shock protein HSP 90-alpha	32;7;4;3;1	17;2;0;2;0	17;2;0;2;0	5	32	17	17	29	10	31	31	32	22	30	28	30	30	15	28	23	19	22	19	15	4	6	13	8	4	23	11	22	16	19	13	11	9	15	18	12	21	9	18	18	6	15
HSP90AB1	P08238	Heat shock protein HSP 90-beta OS=Homo sapiens GN=HSP90AB1 PE=1 SV=4	Heat shock protein HSP 90-beta	36;15	36;15	17;5	2	36	36	17	34	9	35	34	34	24	35	34	35	33	17	29	28	21	24	21	17	6	4	14	8	4	23	10	23	19	22	16	14	11	18	22	10	20	11	24	21	6	15
HSP90B1	P14625	Endoplasmin OS=Homo sapiens GN=HSP90B1 PE=1 SV=1	Endoplasmin	36;4	34;4	34;4	2	36	34	34	33	3	32	34	34	21	34	35	34	33	15	30	26	21	22	20	13	3	2	11	4	0	25	5	18	8	15	6	6	3	12	17	1	23	1	25	17	3	16
HSPA13	P48723	Heat shock 70 kDa protein 13 OS=Homo sapiens GN=HSPA13 PE=1 SV=1	Heat shock 70 kDa protein 13	2	2	2	1	2	2	2	2	0	2	2	2	0	2	2	2	2	0	1	1	1	2	2	0	0	0	1	0	0	1	0	0	0	0	0	0	0	0	0	0	0	0	0	0	0	0
HSPA1A	P08107	Heat shock 70 kDa protein 1A/1B OS=Homo sapiens GN=HSPA1A PE=1 SV=5	Heat shock 70 kDa protein 1A	30	26	14	1	30	26	14	26	8	28	25	28	20	27	24	26	25	16	28	25	20	22	19	14	6	6	16	11	1	22	11	19	14	17	17	10	9	14	17	7	18	5	20	16	8	12
HSPA2	P54652	Heat shock-related 70 kDa protein 2 OS=Homo sapiens GN=HSPA2 PE=1 SV=1	Heat shock-related 70 kDa protein 2	20	8	8	1	20	8	8	17	6	18	17	16	13	18	16	19	19	13	16	14	14	14	15	13	7	5	9	7	2	15	10	11	9	11	8	8	7	10	14	4	16	5	12	12	5	12
HSPA4	P34932	Heat shock 70 kDa protein 4 OS=Homo sapiens GN=HSPA4 PE=1 SV=4	Heat shock 70 kDa protein 4	25	23	22	1	25	23	22	20	0	22	21	22	15	21	18	21	22	5	19	14	16	15	15	9	0	0	4	2	0	17	3	16	10	12	5	2	0	4	12	0	10	0	12	12	1	8
HSPA4L	O95757	Heat shock 70 kDa protein 4L OS=Homo sapiens GN=HSPA4L PE=1 SV=3	Heat shock 70 kDa protein 4L	5	2	2	1	5	2	2	2	0	2	3	3	1	2	2	3	4	0	1	2	1	1	1	0	0	0	0	0	0	3	1	2	1	2	0	0	0	1	0	0	3	0	1	1	0	1
HSPA5	P11021	78 kDa glucose-regulated protein OS=Homo sapiens GN=HSPA5 PE=1 SV=2	78 kDa glucose-regulated protein	39	39	38	1	39	39	38	32	11	34	35	35	25	36	35	36	36	24	34	29	26	27	25	20	7	7	18	8	4	31	15	25	16	22	12	15	12	20	21	13	31	8	27	25	12	14
HSPA8	P11142	Heat shock cognate 71 kDa protein OS=Homo sapiens GN=HSPA8 PE=1 SV=1	Heat shock cognate 71 kDa protein	36	35	23	1	36	35	23	33	13	33	34	31	29	32	30	34	33	26	33	29	29	31	30	26	14	15	22	18	6	31	17	26	26	29	24	21	18	24	28	11	27	14	31	29	13	25
HSPA9	P38646	Stress-70 protein, mitochondrial OS=Homo sapiens GN=HSPA9 PE=1 SV=2	Stress-70 protein, mitochondrial	20	20	20	1	20	20	20	19	0	19	17	18	6	18	16	20	19	5	15	9	10	12	10	4	0	1	4	0	0	12	3	9	3	6	1	2	3	5	7	0	7	0	8	7	1	4
HSPB1	P04792	Heat shock protein beta-1 OS=Homo sapiens GN=HSPB1 PE=1 SV=2	Heat shock protein beta-1	13	13	13	1	13	13	13	11	8	10	12	10	8	11	11	12	12	10	11	9	9	9	8	11	6	7	8	7	4	10	8	9	7	6	7	6	5	9	7	6	10	4	7	9	7	9
HSPB6	O14558	Heat shock protein beta-6 OS=Homo sapiens GN=HSPB6 PE=1 SV=2	Heat shock protein beta-6	4	4	4	1	4	4	4	2	0	2	2	2	0	1	0	1	2	0	2	1	2	3	2	0	0	0	0	1	0	2	0	0	0	0	0	0	0	0	0	0	1	0	1	1	0	0
HSPD1	P10809	60 kDa heat shock protein, mitochondrial OS=Homo sapiens GN=HSPD1 PE=1 SV=2	60 kDa heat shock protein, mitochondrial	23	23	23	1	23	23	23	18	2	18	16	18	7	17	17	22	19	7	18	14	17	17	17	13	1	3	5	0	0	19	9	7	3	4	2	1	1	7	7	0	17	0	10	10	2	9
HSPE1	P61604	10 kDa heat shock protein, mitochondrial OS=Homo sapiens GN=HSPE1 PE=1 SV=2	10 kDa heat shock protein, mitochondrial	6	6	6	1	6	6	6	5	2	3	3	3	3	4	5	5	5	2	3	3	3	3	3	2	1	1	3	2	0	4	3	2	2	2	1	0	1	3	2	0	4	0	2	2	0	3
HSPG2	P98160	Basement membrane-specific heparan sulfate proteoglycan core protein OS=Homo sapiens GN=HSPG2 PE=1 SV=4	Basement membrane-specific heparan sulfate proteoglycan core protein;Endorepellin;LG3 peptide	51	51	51	1	51	51	51	2	0	2	5	12	4	29	30	46	38	5	3	11	3	5	4	4	0	0	36	12	0	9	1	0	1	0	1	0	2	6	11	1	7	0	1	1	0	6
HSPH1	Q92598	Heat shock protein 105 kDa OS=Homo sapiens GN=HSPH1 PE=1 SV=1	Heat shock protein 105 kDa	32	32	29	1	32	32	29	17	1	27	27	26	9	24	16	26	25	3	16	12	15	16	9	2	0	1	3	1	0	12	0	15	7	12	1	0	1	5	12	0	4	0	11	10	0	0
HTRA1	Q92743	Serine protease HTRA1 OS=Homo sapiens GN=HTRA1 PE=1 SV=1	Serine protease HTRA1	8	8	8	1	8	8	8	3	0	1	1	2	0	3	2	3	5	0	6	0	2	4	4	2	0	0	5	1	0	6	2	1	0	0	0	2	0	0	1	0	6	0	2	1	0	3
HTRA2	O43464	Serine protease HTRA2, mitochondrial OS=Homo sapiens GN=HTRA2 PE=1 SV=2	Serine protease HTRA2, mitochondrial	3;1	3;1	3;1	2	3	3	3	2	0	3	3	3	0	2	3	3	3	1	0	2	0	0	0	1	0	0	0	0	0	0	0	0	0	0	0	0	0	0	1	0	0	0	0	0	0	0
HUWE1	Q7Z6Z7	E3 ubiquitin-protein ligase HUWE1 OS=Homo sapiens GN=HUWE1 PE=1 SV=3	E3 ubiquitin-protein ligase HUWE1	3	3	3	1	3	3	3	3	0	2	2	2	0	1	0	3	1	0	0	1	0	1	0	0	0	0	0	0	0	0	0	0	0	1	0	0	0	0	0	0	0	0	0	0	0	0
HYOU1	Q9Y4L1	Hypoxia up-regulated protein 1 OS=Homo sapiens GN=HYOU1 PE=1 SV=1	Hypoxia up-regulated protein 1	23	23	22	1	23	23	22	14	0	17	16	16	9	17	17	21	17	2	14	12	8	9	7	0	0	0	3	0	0	7	2	7	1	5	1	1	0	1	6	0	2	0	6	2	0	1
IARS	P41252	Isoleucine--tRNA ligase, cytoplasmic OS=Homo sapiens GN=IARS PE=1 SV=2	Isoleucine--tRNA ligase, cytoplasmic	22	22	22	1	22	22	22	10	0	11	9	11	0	9	6	21	21	3	6	5	8	10	5	0	0	0	4	0	0	2	1	1	1	0	0	1	0	0	4	0	2	0	4	3	0	2
ICAM1	P05362	Intercellular adhesion molecule 1 OS=Homo sapiens GN=ICAM1 PE=1 SV=2	Intercellular adhesion molecule 1	12	12	12	1	12	12	12	10	0	11	11	11	6	11	9	9	9	1	9	8	9	8	6	4	0	0	1	0	0	7	1	7	7	4	3	3	0	3	3	0	2	0	4	4	0	3
IDE	P14735	Insulin-degrading enzyme OS=Homo sapiens GN=IDE PE=1 SV=4	Insulin-degrading enzyme	8	8	8	1	8	8	8	6	1	5	6	6	1	5	5	6	6	6	6	5	6	6	5	5	0	0	1	2	0	6	5	0	1	0	0	1	0	0	3	0	5	0	4	4	2	6
IDH1	O75874	Isocitrate dehydrogenase [NADP] cytoplasmic OS=Homo sapiens GN=IDH1 PE=1 SV=2	Isocitrate dehydrogenase [NADP] cytoplasmic	8	8	8	1	8	8	8	3	2	7	7	5	2	6	6	6	5	0	4	5	7	6	2	3	1	1	2	2	0	4	1	3	2	2	2	1	0	1	2	0	4	0	2	3	0	3
IDH3A	P50213	Isocitrate dehydrogenase [NAD] subunit alpha, mitochondrial OS=Homo sapiens GN=IDH3A PE=1 SV=1	Isocitrate dehydrogenase [NAD] subunit alpha, mitochondrial	2	2	2	1	2	2	2	0	0	0	1	1	0	1	1	2	2	1	0	0	2	1	0	1	0	0	0	0	0	1	0	1	1	0	0	0	0	0	1	0	0	0	0	0	0	1
IFIT1	P09914	Interferon-induced protein with tetratricopeptide repeats 1 OS=Homo sapiens GN=IFIT1 PE=1 SV=2	Interferon-induced protein with tetratricopeptide repeats 1	2	2	2	1	2	2	2	0	0	1	1	0	0	0	0	2	1	0	0	0	0	0	0	0	0	0	0	0	0	0	0	0	0	1	0	0	0	0	0	0	0	0	0	0	0	0
IFITM1	P13164	Interferon-induced transmembrane protein 1 OS=Homo sapiens GN=IFITM1 PE=1 SV=3;Interferon-induced transmembrane protein 2 OS=Homo sapiens GN=IFITM2 PE=1 SV=2;Interferon-induced transmembrane protein 3 OS=Homo sapiens GN=IFITM3 PE=1 SV=2	Interferon-induced transmembrane protein 1;Interferon-induced transmembrane protein 2;Interferon-induced transmembrane protein 3	2;2;2	2;2;2	2;2;2	3	2	2	2	2	0	0	1	2	1	2	1	1	2	0	2	0	1	1	1	1	1	0	2	0	0	1	0	1	0	1	0	0	0	0	0	0	2	0	2	1	1	0
IGF2BP1	Q9NZI8	Insulin-like growth factor 2 mRNA-binding protein 1 OS=Homo sapiens GN=IGF2BP1 PE=1 SV=2	Insulin-like growth factor 2 mRNA-binding protein 1	9	9	8	1	9	9	8	4	0	5	7	6	1	3	7	9	9	2	1	4	5	5	3	0	0	0	0	0	0	1	0	2	2	1	1	0	0	6	4	0	0	0	1	0	0	1
IGF2BP2	Q9Y6M1	Insulin-like growth factor 2 mRNA-binding protein 2 OS=Homo sapiens GN=IGF2BP2 PE=1 SV=2	Insulin-like growth factor 2 mRNA-binding protein 2	6	5	5	1	6	5	5	4	0	3	4	3	0	3	3	5	5	2	2	2	3	3	3	0	0	0	0	0	1	1	0	1	0	0	0	0	0	3	1	0	1	0	0	0	0	0
IGF2BP3	O00425	Insulin-like growth factor 2 mRNA-binding protein 3 OS=Homo sapiens GN=IGF2BP3 PE=1 SV=2	Insulin-like growth factor 2 mRNA-binding protein 3	6	5	5	1	6	5	5	4	0	4	2	4	1	2	1	6	5	1	2	0	4	5	1	0	0	0	0	0	0	3	0	1	0	0	1	0	0	2	1	0	1	0	0	0	0	0
IGF2R	P11717	Cation-independent mannose-6-phosphate receptor OS=Homo sapiens GN=IGF2R PE=1 SV=3	Cation-independent mannose-6-phosphate receptor	34	34	34	1	34	34	34	24	1	22	22	31	11	26	24	30	28	3	22	10	16	20	13	3	0	1	3	1	1	17	0	4	1	9	3	0	0	0	13	0	12	0	8	7	0	5
IGHA1	P01876	Ig alpha-1 chain C region OS=Homo sapiens GN=IGHA1 PE=1 SV=2	Ig alpha-1 chain C region	7	7	2	1	7	7	2	5	4	5	6	5	5	6	6	2	3	4	5	6	6	5	6	6	3	4	6	3	4	5	4	5	2	3	3	0	2	1	5	4	5	0	5	5	3	5
IGHG1	P01857	Ig gamma-1 chain C region OS=Homo sapiens GN=IGHG1 PE=1 SV=1;Ig gamma-3 chain C region OS=Homo sapiens GN=IGHG3 PE=1 SV=2	Ig gamma-1 chain C region;Ig gamma-3 chain C region	8;4;2	8;4;2	6;2;0	3	8	8	6	5	3	5	4	4	2	4	3	5	4	5	5	4	3	4	4	5	2	2	3	3	0	4	3	4	1	2	2	1	3	1	4	2	5	2	3	3	1	5
IGHG2	P01859	Ig gamma-2 chain C region OS=Homo sapiens GN=IGHG2 PE=1 SV=2	Ig gamma-2 chain C region	4	2	2	1	4	2	2	3	1	3	2	2	0	1	1	1	1	2	2	1	1	2	0	2	1	1	0	1	0	0	2	1	1	0	1	1	1	1	1	1	3	1	2	0	0	1
IGKC	P01834	Ig kappa chain C region OS=Homo sapiens GN=IGKC PE=1 SV=1	Ig kappa chain C region	4	4	4	1	4	4	4	3	3	3	3	3	1	3	2	2	2	3	2	2	2	3	2	2	1	2	1	0	2	3	3	1	1	0	1	1	1	2	2	1	2	0	2	3	2	4
IGKV3-20	P04206	Ig kappa chain V-III region GOL OS=Homo sapiens PE=1 SV=1;Ig kappa chain V-III region WOL OS=Homo sapiens PE=1 SV=1;Ig kappa chain V-III region Ti OS=Homo sapiens PE=1 SV=1;Ig kappa chain V-III region SIE OS=Homo sapiens PE=1 SV=1;Ig kappa chain V-III regi	Ig kappa chain V-III region GOL;Ig kappa chain V-III region WOL;Ig kappa chain V-III region Ti;Ig kappa chain V-III region SIE;Ig kappa chain V-III region HIC;Ig kappa chain V-III region HAH	2;2;2;2;1;1	2;2;2;2;1;1	2;2;2;2;1;1	6	2	2	2	2	0	2	1	1	0	1	1	0	1	1	1	1	1	1	1	2	1	1	0	0	1	2	2	0	0	0	0	0	0	0	1	0	1	0	1	1	0	1
IGLC3	P0CG06	Ig lambda-3 chain C regions OS=Homo sapiens GN=IGLC3 PE=1 SV=1;Ig lambda-2 chain C regions OS=Homo sapiens GN=IGLC2 PE=1 SV=1;Ig lambda-6 chain C region OS=Homo sapiens GN=IGLC6 PE=4 SV=1;Ig lambda-7 chain C region OS=Homo sapiens GN=IGLC7 PE=1 SV=2;Ig lam	Ig lambda-3 chain C regions;Ig lambda-2 chain C regions;Ig lambda-6 chain C region;Ig lambda-7 chain C region;Ig lambda-1 chain C regions	2;2;2;2;1	2;2;2;2;1	1;1;1;1;0	5	2	2	1	1	1	1	1	1	0	1	1	1	2	2	1	2	1	1	1	2	0	1	1	0	2	2	2	0	0	0	0	0	0	0	1	0	2	0	1	1	1	1
IGSF8	Q969P0	Immunoglobulin superfamily member 8 OS=Homo sapiens GN=IGSF8 PE=1 SV=1	Immunoglobulin superfamily member 8	11	11	11	1	11	11	11	11	0	4	6	8	1	3	2	2	1	0	10	0	9	10	8	2	0	0	6	2	1	9	0	1	0	1	0	0	0	0	0	0	4	0	8	8	1	5
IKBIP	Q70UQ0	Inhibitor of nuclear factor kappa-B kinase-interacting protein OS=Homo sapiens GN=IKBIP PE=1 SV=1	Inhibitor of nuclear factor kappa-B kinase-interacting protein	3	3	3	1	3	3	3	0	0	1	1	2	1	2	1	3	3	0	1	0	0	0	0	0	0	0	0	0	0	0	0	0	0	0	0	0	0	0	1	1	0	0	1	1	0	0
IKBKAP	O95163	Elongator complex protein 1 OS=Homo sapiens GN=IKBKAP PE=1 SV=3	Elongator complex protein 1	5	5	5	1	5	5	5	2	0	4	3	3	0	3	1	5	3	0	0	0	1	2	0	0	0	0	0	0	0	0	0	0	0	0	0	0	0	0	0	0	0	0	0	0	0	0
IL1RN	P18510	Interleukin-1 receptor antagonist protein OS=Homo sapiens GN=IL1RN PE=1 SV=1	Interleukin-1 receptor antagonist protein	2	2	2	1	2	2	2	1	1	2	2	1	0	2	1	2	2	1	2	1	1	1	1	2	0	0	1	0	0	2	1	0	0	0	0	0	0	0	2	0	2	0	2	2	0	2
IL36G	Q9NZH8	Interleukin-36 gamma OS=Homo sapiens GN=IL36G PE=1 SV=1	Interleukin-36 gamma	3	3	3	1	3	3	3	2	0	2	2	2	0	2	2	1	2	2	2	1	2	2	1	1	1	0	1	1	2	2	1	1	0	1	0	0	0	0	0	1	2	0	1	1	0	1
IL6ST	P40189	Interleukin-6 receptor subunit beta OS=Homo sapiens GN=IL6ST PE=1 SV=2	Interleukin-6 receptor subunit beta	3	3	3	1	3	3	3	3	1	2	1	2	1	2	1	1	1	1	2	1	2	2	2	1	0	1	2	1	1	2	1	1	0	1	0	0	0	0	0	0	2	0	0	1	0	1
ILF2	Q12905	Interleukin enhancer-binding factor 2 OS=Homo sapiens GN=ILF2 PE=1 SV=2	Interleukin enhancer-binding factor 2	8	8	8	1	8	8	8	1	0	5	6	6	0	6	2	8	8	0	0	2	1	2	1	0	0	0	0	0	0	0	0	1	0	1	0	0	0	0	0	0	0	0	1	0	0	1
ILF3	Q12906	Interleukin enhancer-binding factor 3 OS=Homo sapiens GN=ILF3 PE=1 SV=3	Interleukin enhancer-binding factor 3	3	3	2	1	3	3	2	1	0	1	2	1	0	2	1	3	1	0	0	0	0	0	0	0	0	0	0	0	0	0	0	1	0	0	0	0	0	0	0	0	0	0	0	0	0	0
ILK	Q13418	Integrin-linked protein kinase OS=Homo sapiens GN=ILK PE=1 SV=2	Integrin-linked protein kinase	5	5	5	1	5	5	5	2	0	3	4	3	1	3	3	5	4	0	2	1	2	2	2	0	0	0	1	0	0	4	0	0	0	1	1	0	0	1	2	0	2	0	1	1	0	0
IMMT	Q16891	MICOS complex subunit MIC60 OS=Homo sapiens GN=IMMT PE=1 SV=1	MICOS complex subunit MIC60	3	3	3	1	3	3	3	2	0	0	0	1	0	3	3	3	3	1	1	0	0	1	3	0	0	0	0	0	0	2	0	0	0	0	0	0	0	0	1	0	1	0	1	1	0	1
IMPA1	P29218	Inositol monophosphatase 1 OS=Homo sapiens GN=IMPA1 PE=1 SV=1	Inositol monophosphatase 1	2	2	2	1	2	2	2	2	0	2	2	2	0	1	1	0	1	1	2	2	1	1	1	1	0	0	0	0	0	1	1	0	0	0	0	0	0	0	0	0	1	0	1	1	0	1
IMPA2	O14732	Inositol monophosphatase 2 OS=Homo sapiens GN=IMPA2 PE=1 SV=1	Inositol monophosphatase 2	2	2	2	1	2	2	2	1	0	1	0	1	0	1	1	0	0	0	1	0	0	1	0	0	0	0	0	1	1	1	1	0	0	1	1	0	0	1	1	0	1	0	2	2	0	1
IMPAD1	Q9NX62	Inositol monophosphatase 3 OS=Homo sapiens GN=IMPAD1 PE=1 SV=1	Inositol monophosphatase 3	2	2	2	1	2	2	2	1	0	1	1	1	0	1	0	1	2	0	1	1	1	1	1	0	0	0	0	0	0	1	0	0	0	0	0	0	0	0	0	0	0	0	0	0	0	0
IMPDH1	P20839	Inosine-5-monophosphate dehydrogenase 1 OS=Homo sapiens GN=IMPDH1 PE=1 SV=2	Inosine-5-monophosphate dehydrogenase 1	3	2	2	1	3	2	2	2	2	2	2	2	1	2	2	3	2	1	1	1	1	1	0	0	1	0	1	1	0	1	1	1	1	1	0	0	0	1	1	0	0	0	0	1	0	0
IMPDH2	P12268	Inosine-5-monophosphate dehydrogenase 2 OS=Homo sapiens GN=IMPDH2 PE=1 SV=2	Inosine-5-monophosphate dehydrogenase 2	12	12	11	1	12	12	11	9	1	10	10	11	1	10	10	12	11	6	8	5	5	7	6	2	1	0	2	1	0	6	2	2	2	1	0	0	1	1	4	0	4	0	1	2	0	1
IPO5	O00410	Importin-5 OS=Homo sapiens GN=IPO5 PE=1 SV=4	Importin-5	8;1	8;1	8;1	2	8	8	8	8	0	7	7	7	1	7	5	8	8	0	7	1	7	5	2	0	0	0	1	0	0	5	0	3	1	1	1	1	0	1	1	1	0	0	2	2	0	0
IPO7	O95373	Importin-7 OS=Homo sapiens GN=IPO7 PE=1 SV=1	Importin-7	4	4	4	1	4	4	4	3	0	4	3	4	0	2	2	4	3	0	3	1	2	3	2	0	0	0	0	0	0	1	0	1	0	0	0	0	0	0	0	0	1	0	0	0	0	0
IPO9	Q96P70	Importin-9 OS=Homo sapiens GN=IPO9 PE=1 SV=3	Importin-9	2	2	2	1	2	2	2	1	0	1	1	1	1	1	1	2	1	0	1	0	0	1	1	1	0	0	0	0	0	1	0	1	1	1	0	0	0	1	0	0	0	0	1	1	0	0
IQGAP1	P46940	Ras GTPase-activating-like protein IQGAP1 OS=Homo sapiens GN=IQGAP1 PE=1 SV=1	Ras GTPase-activating-like protein IQGAP1	63;2	63;2	61;1	2	63	63	61	46	0	54	51	53	27	46	43	51	43	9	41	32	36	37	30	15	0	1	9	4	2	30	3	30	23	28	11	4	1	13	25	3	22	2	29	25	1	23
IQSEC3	Q9UPP2	IQ motif and SEC7 domain-containing protein 3 OS=Homo sapiens GN=IQSEC3 PE=2 SV=3	IQ motif and SEC7 domain-containing protein 3	2	2	2	1	2	2	2	1	0	1	2	1	0	1	1	1	1	1	1	1	1	1	1	1	0	0	0	0	0	1	0	0	0	0	0	0	0	0	0	0	1	0	0	0	0	0
IRGQ	Q8WZA9	Immunity-related GTPase family Q protein OS=Homo sapiens GN=IRGQ PE=1 SV=1	Immunity-related GTPase family Q protein	2	2	2	1	2	2	2	2	0	2	2	2	0	2	1	2	1	0	1	0	2	2	2	0	0	0	0	0	0	0	0	0	0	0	0	0	0	0	0	0	0	0	1	0	0	0
ISG15	P05161	Ubiquitin-like protein ISG15 OS=Homo sapiens GN=ISG15 PE=1 SV=5	Ubiquitin-like protein ISG15	4	4	4	1	4	4	4	4	0	4	4	4	3	4	4	4	4	1	4	2	4	4	3	0	0	0	1	0	0	2	0	4	1	2	2	0	0	1	2	0	0	0	1	0	0	1
ISOC1	Q96CN7	Isochorismatase domain-containing protein 1 OS=Homo sapiens GN=ISOC1 PE=1 SV=3	Isochorismatase domain-containing protein 1	2	2	2	1	2	2	2	1	0	2	2	2	0	2	0	2	2	0	2	1	2	1	1	0	0	0	0	0	0	1	0	0	0	0	0	0	0	0	0	0	1	0	0	0	0	0
IST1	P53990	IST1 homolog OS=Homo sapiens GN=IST1 PE=1 SV=1	IST1 homolog	6	6	6	1	6	6	6	5	0	6	6	6	6	5	6	5	5	0	5	2	4	4	4	3	0	1	3	2	0	6	0	4	1	5	3	0	0	2	2	0	3	0	2	2	0	3
ITFG3	Q9H0X4	Protein ITFG3 OS=Homo sapiens GN=ITFG3 PE=1 SV=1	Protein ITFG3	3	3	3	1	3	3	3	3	0	3	3	3	1	3	1	3	2	0	3	0	2	2	2	0	0	0	0	1	0	2	0	1	0	0	0	0	0	0	0	0	1	0	1	1	0	0
ITGA1	P56199	Integrin alpha-1 OS=Homo sapiens GN=ITGA1 PE=1 SV=2	Integrin alpha-1	21	21	21	1	21	21	21	17	0	14	14	15	7	14	10	10	10	0	16	1	16	16	11	3	0	0	0	3	1	13	1	8	0	4	0	0	0	0	1	1	10	0	19	15	0	9
ITGA11	Q9UKX5	Integrin alpha-11 OS=Homo sapiens GN=ITGA11 PE=1 SV=2	Integrin alpha-11	4	4	4	1	4	4	4	3	0	0	0	1	0	1	0	0	0	0	3	0	4	2	3	0	0	0	0	0	0	3	0	0	0	0	0	0	0	0	0	0	2	0	1	1	0	0
ITGA2	P17301	Integrin alpha-2 OS=Homo sapiens GN=ITGA2 PE=1 SV=1	Integrin alpha-2	33	33	33	1	33	33	33	33	5	30	31	30	16	26	22	25	21	4	33	18	30	29	25	17	3	1	11	5	1	28	12	17	9	11	4	1	2	3	8	1	23	0	29	27	4	23
ITGA3	P26006	Integrin alpha-3 OS=Homo sapiens GN=ITGA3 PE=1 SV=5	Integrin alpha-3;Integrin alpha-3 heavy chain;Integrin alpha-3 light chain	18	18	18	1	18	18	18	17	1	13	16	16	8	13	10	13	10	1	18	4	15	15	14	7	1	0	5	3	0	11	1	6	5	7	1	1	0	2	5	0	11	0	14	12	0	7
ITGA4	P13612	Integrin alpha-4 OS=Homo sapiens GN=ITGA4 PE=1 SV=3	Integrin alpha-4	14	14	14	1	14	14	14	14	0	4	8	9	3	1	2	6	3	0	14	0	11	12	8	0	0	0	2	0	0	7	0	2	0	3	0	1	0	0	1	0	6	0	8	9	0	2
ITGA5	P08648	Integrin alpha-5 OS=Homo sapiens GN=ITGA5 PE=1 SV=2	Integrin alpha-5;Integrin alpha-5 heavy chain;Integrin alpha-5 light chain	15	15	15	1	15	15	15	14	0	14	14	14	8	11	7	9	12	2	14	6	13	13	11	3	1	0	4	0	0	12	1	9	6	6	2	3	1	3	4	1	10	0	14	12	0	9
ITGA6	P23229	Integrin alpha-6 OS=Homo sapiens GN=ITGA6 PE=1 SV=5	Integrin alpha-6;Integrin alpha-6 heavy chain;Integrin alpha-6 light chain;Processed integrin alpha-6	27	27	27	1	27	27	27	24	0	21	20	21	5	8	9	10	13	1	24	2	21	21	20	7	0	0	3	0	0	21	1	8	1	7	2	1	0	1	6	0	11	0	23	19	0	14
ITGA7	Q13683	Integrin alpha-7 OS=Homo sapiens GN=ITGA7 PE=1 SV=3	Integrin alpha-7;Integrin alpha-7 heavy chain;Integrin alpha-7 light chain;Integrin alpha-7 70 kDa form	3	3	3	1	3	3	3	1	0	1	1	1	0	0	0	0	0	0	1	1	1	2	1	0	0	0	0	0	0	1	0	0	0	0	0	0	0	0	0	0	0	0	2	1	0	2
ITGAV	P06756	Integrin alpha-V OS=Homo sapiens GN=ITGAV PE=1 SV=2	Integrin alpha-V;Integrin alpha-V heavy chain;Integrin alpha-V light chain	24	24	24	1	24	24	24	21	1	21	21	21	8	19	15	15	16	3	20	8	18	21	19	10	1	0	9	3	0	20	2	9	4	7	1	0	0	2	7	0	16	1	18	15	3	13
ITGB1	P05556	Integrin beta-1 OS=Homo sapiens GN=ITGB1 PE=1 SV=2	Integrin beta-1	27	27	27	1	27	27	27	27	8	23	25	25	20	24	20	21	23	11	26	16	24	25	22	15	5	4	16	10	1	27	9	21	12	19	8	5	3	7	5	4	21	3	24	22	5	18
ITGB1BP1	O14713	Integrin beta-1-binding protein 1 OS=Homo sapiens GN=ITGB1BP1 PE=1 SV=1	Integrin beta-1-binding protein 1	2	2	2	1	2	2	2	2	0	1	0	1	1	0	0	0	0	0	2	0	2	2	2	1	1	0	0	0	0	0	0	1	0	0	0	0	0	0	0	0	0	0	1	2	0	1
ITGB3	P05106	Integrin beta-3 OS=Homo sapiens GN=ITGB3 PE=1 SV=2	Integrin beta-3	12	12	12	1	12	12	12	9	0	9	9	10	4	8	9	6	7	0	10	4	10	10	10	3	0	0	0	0	0	8	0	3	0	4	0	0	0	0	2	0	7	0	5	5	0	3
ITGB5	P18084	Integrin beta-5 OS=Homo sapiens GN=ITGB5 PE=1 SV=1	Integrin beta-5	6	6	6	1	6	6	6	6	0	6	5	6	0	2	1	4	2	0	6	0	6	5	4	0	0	0	0	0	0	2	0	1	0	0	0	0	0	0	0	0	2	0	2	1	1	1
ITM2B	Q9Y287	Integral membrane protein 2B OS=Homo sapiens GN=ITM2B PE=1 SV=1	Integral membrane protein 2B;BRI2, membrane form;BRI2 intracellular domain;BRI2C, soluble form;Bri23 peptide	3	3	3	1	3	3	3	1	0	1	1	1	1	1	1	1	1	0	2	1	1	1	1	1	0	0	2	0	0	1	0	0	0	0	0	0	0	0	0	0	1	0	1	1	0	1
ITM2C	Q9NQX7	Integral membrane protein 2C OS=Homo sapiens GN=ITM2C PE=1 SV=1	Integral membrane protein 2C;CT-BRI3	4	4	4	1	4	4	4	2	0	1	2	2	0	3	2	2	3	0	2	1	1	3	1	0	0	0	1	0	0	2	0	0	0	0	0	0	0	0	0	0	2	0	1	1	0	1
IVL	P07476	Involucrin OS=Homo sapiens GN=IVL PE=1 SV=2	Involucrin	4	4	4	1	4	4	4	3	2	4	1	2	2	4	1	1	3	3	2	1	0	2	2	1	0	1	0	0	0	3	2	3	1	1	0	0	0	0	0	0	4	0	3	2	0	0
JAGN1	Q8N5M9	Protein jagunal homolog 1 OS=Homo sapiens GN=JAGN1 PE=1 SV=1	Protein jagunal homolog 1	2	2	2	1	2	2	2	2	0	2	2	2	1	2	2	2	2	0	2	1	2	2	2	0	0	0	0	0	0	2	0	0	0	1	0	0	0	0	1	0	1	0	1	1	0	0
JAK1	P23458	Tyrosine-protein kinase JAK1 OS=Homo sapiens GN=JAK1 PE=1 SV=2	Tyrosine-protein kinase JAK1	4	4	4	1	4	4	4	3	0	2	2	2	0	1	1	1	0	1	3	0	4	4	3	0	0	0	0	0	0	1	0	0	0	0	0	0	0	0	0	0	1	0	0	0	0	0
JAM2	P57087	Junctional adhesion molecule B OS=Homo sapiens GN=JAM2 PE=1 SV=1	Junctional adhesion molecule B	4	4	4	1	4	4	4	2	0	3	3	4	2	3	1	2	1	0	2	0	3	4	4	0	0	0	0	0	0	1	1	3	0	2	0	0	0	0	0	0	1	0	0	0	0	0
JAM3	Q9BX67	Junctional adhesion molecule C OS=Homo sapiens GN=JAM3 PE=1 SV=1	Junctional adhesion molecule C	6	6	6	1	6	6	6	5	0	5	5	5	2	4	3	4	5	0	5	0	5	5	5	1	0	0	2	1	0	5	1	2	1	3	0	0	0	0	0	0	3	0	4	4	0	1
JMJD6	Q6NYC1	Bifunctional arginine demethylase and lysyl-hydroxylase JMJD6 OS=Homo sapiens GN=JMJD6 PE=1 SV=1	Bifunctional arginine demethylase and lysyl-hydroxylase JMJD6	2	2	2	1	2	2	2	0	0	2	2	2	0	1	0	2	2	0	0	0	0	0	0	0	0	0	0	0	0	0	0	0	0	0	0	0	0	0	0	0	0	0	0	0	0	0
JUP	P14923	Junction plakoglobin OS=Homo sapiens GN=JUP PE=1 SV=3	Junction plakoglobin	25	25	23	1	25	25	23	21	17	22	18	19	14	21	18	20	19	19	21	19	16	18	18	19	10	14	14	14	11	21	18	13	13	12	14	8	8	9	19	14	20	5	22	19	10	19
KARS	Q15046	Lysine--tRNA ligase OS=Homo sapiens GN=KARS PE=1 SV=3	Lysine--tRNA ligase	3	3	3	1	3	3	3	3	0	3	3	3	1	3	3	3	3	0	2	0	2	1	1	0	0	0	0	0	0	1	0	1	0	0	0	0	0	0	0	0	0	0	0	1	0	0
KCTD12	Q96CX2	BTB/POZ domain-containing protein KCTD12 OS=Homo sapiens GN=KCTD12 PE=1 SV=1	BTB/POZ domain-containing protein KCTD12	3	3	3	1	3	3	3	2	0	1	1	1	0	2	0	2	1	0	3	0	3	2	3	0	0	0	0	0	0	2	0	0	0	0	0	0	0	0	0	0	0	0	1	1	0	1
KHDRBS1	Q07666	KH domain-containing, RNA-binding, signal transduction-associated protein 1 OS=Homo sapiens GN=KHDRBS1 PE=1 SV=1	KH domain-containing, RNA-binding, signal transduction-associated protein 1	3	3	3	1	3	3	3	1	1	2	2	2	1	2	1	3	1	0	1	1	1	1	1	0	0	0	0	1	0	2	0	0	0	2	0	0	0	0	0	0	1	0	1	1	0	0
KHSRP	Q92945	Far upstream element-binding protein 2 OS=Homo sapiens GN=KHSRP PE=1 SV=4	Far upstream element-binding protein 2	6	6	6	1	6	6	6	0	0	3	4	4	0	3	1	5	5	0	0	1	1	0	0	0	0	0	1	0	0	0	0	2	0	0	0	0	0	0	2	0	0	0	0	0	0	0
KIAA1211	Q6ZU35	Uncharacterized protein KIAA1211 OS=Homo sapiens GN=KIAA1211 PE=1 SV=3	Uncharacterized protein KIAA1211	2	2	2	1	2	2	2	0	1	1	0	0	0	1	0	0	1	1	1	0	0	1	1	1	0	0	0	0	0	0	0	1	0	1	0	0	0	0	0	0	1	0	1	1	0	0
KIF11	P52732	Kinesin-like protein KIF11 OS=Homo sapiens GN=KIF11 PE=1 SV=2	Kinesin-like protein KIF11	4	4	4	1	4	4	4	1	0	2	2	2	1	1	1	4	2	0	1	0	0	0	0	0	0	0	0	0	0	0	0	1	0	0	1	0	0	1	2	0	0	0	0	0	0	1
KIF2A	O00139	Kinesin-like protein KIF2A OS=Homo sapiens GN=KIF2A PE=1 SV=3	Kinesin-like protein KIF2A	2	2	2	1	2	2	2	1	0	0	0	0	0	0	0	2	1	0	1	0	0	1	0	0	0	0	0	0	0	0	0	0	0	0	0	0	0	0	0	0	0	0	0	0	0	0
KIF5B	P33176	Kinesin-1 heavy chain OS=Homo sapiens GN=KIF5B PE=1 SV=1	Kinesin-1 heavy chain	18;5	18;5	14;1	2	18	18	14	12	0	15	10	14	3	12	10	16	13	1	9	6	11	10	9	1	0	1	1	0	0	6	0	5	1	2	0	0	0	0	5	0	4	0	8	6	0	4
KIRREL	Q96J84	Kin of IRRE-like protein 1 OS=Homo sapiens GN=KIRREL PE=1 SV=2	Kin of IRRE-like protein 1	4	4	4	1	4	4	4	2	0	1	1	2	0	1	0	0	0	0	2	0	2	2	2	0	0	0	0	0	0	3	0	0	0	0	0	0	0	0	0	0	2	0	3	3	0	3
KLC1	Q07866	Kinesin light chain 1 OS=Homo sapiens GN=KLC1 PE=1 SV=2	Kinesin light chain 1	4;1;1	4;1;1	4;1;1	3	4	4	4	2	0	3	3	2	0	0	0	4	4	0	1	0	1	1	0	0	0	0	1	0	0	0	0	0	0	0	0	0	0	0	2	0	0	0	0	0	0	0
KLHL2	O95198	Kelch-like protein 2 OS=Homo sapiens GN=KLHL2 PE=1 SV=2	Kelch-like protein 2	2	2	2	1	2	2	2	1	1	1	1	1	1	1	1	1	1	1	1	1	1	1	1	1	0	0	0	0	0	1	0	1	0	0	0	0	0	0	1	0	0	0	2	2	0	2
KPNA2	P52292	Importin subunit alpha-1 OS=Homo sapiens GN=KPNA2 PE=1 SV=1	Importin subunit alpha-1	11	11	11	1	11	11	11	6	0	10	10	10	2	9	8	11	9	1	2	2	4	3	2	1	0	0	0	0	0	1	1	4	3	1	1	1	1	2	2	0	0	0	0	0	0	0
KPNA3	O00505	Importin subunit alpha-4 OS=Homo sapiens GN=KPNA3 PE=1 SV=2	Importin subunit alpha-4	2	2	1	1	2	2	1	1	0	1	1	1	0	1	2	1	2	0	1	1	1	2	1	0	0	0	0	0	0	1	0	0	0	0	0	0	0	0	1	0	0	0	1	0	0	0
KPNA6	O60684	Importin subunit alpha-7 OS=Homo sapiens GN=KPNA6 PE=1 SV=1;Importin subunit alpha-6 OS=Homo sapiens GN=KPNA5 PE=1 SV=2	Importin subunit alpha-7;Importin subunit alpha-6	3;2	3;2	2;1	2	3	3	2	2	0	2	1	2	0	2	2	2	1	0	0	0	0	1	0	0	0	0	0	0	0	0	0	0	0	0	0	0	0	0	1	0	0	0	0	0	0	0
KPNB1	Q14974	Importin subunit beta-1 OS=Homo sapiens GN=KPNB1 PE=1 SV=2	Importin subunit beta-1	19	19	19	1	19	19	19	16	0	16	18	17	13	16	17	19	16	3	17	8	12	14	9	3	1	0	8	1	0	11	1	10	3	6	2	1	0	3	6	0	6	0	10	7	0	3
KPRP	Q5T749	Keratinocyte proline-rich protein OS=Homo sapiens GN=KPRP PE=1 SV=1	Keratinocyte proline-rich protein	3	3	3	1	3	3	3	2	2	2	2	2	2	2	2	2	2	2	2	2	1	1	1	3	1	1	2	2	2	3	2	1	0	2	2	0	1	1	0	1	2	1	0	1	2	0
KRAS	P01116	GTPase KRas OS=Homo sapiens GN=KRAS PE=1 SV=1	GTPase KRas;GTPase KRas, N-terminally processed	6	2	2	1	6	2	2	5	0	5	5	5	1	3	1	3	3	0	5	1	3	3	3	3	0	1	1	0	0	4	0	1	2	1	1	0	0	0	2	0	4	0	3	4	0	3
KRIT1	O00522	Krev interaction trapped protein 1 OS=Homo sapiens GN=KRIT1 PE=1 SV=2	Krev interaction trapped protein 1	3	3	3	1	3	3	3	3	0	0	3	1	0	0	0	0	0	0	3	0	3	3	2	0	0	0	0	0	0	1	0	0	0	0	0	0	0	0	0	0	1	0	0	0	0	0
KRT76	Q01546	Keratin, type II cytoskeletal 2 oral OS=Homo sapiens GN=KRT76 PE=1 SV=2	Keratin, type II cytoskeletal 2 oral	23	8	0	1	23	8	0	15	14	15	13	15	14	16	15	11	13	14	15	15	15	14	16	15	11	13	13	14	11	15	12	11	10	12	12	13	10	10	13	12	15	11	14	14	15	14
L1CAM	P32004	Neural cell adhesion molecule L1 OS=Homo sapiens GN=L1CAM PE=1 SV=2	Neural cell adhesion molecule L1	4	4	4	1	4	4	4	3	0	4	4	4	1	3	2	1	4	0	0	1	2	2	0	0	0	0	0	0	0	0	0	1	0	1	0	0	0	0	0	0	0	0	0	0	0	0
LACRT	Q9GZZ8	Extracellular glycoprotein lacritin OS=Homo sapiens GN=LACRT PE=1 SV=1	Extracellular glycoprotein lacritin	2	2	2	1	2	2	2	0	0	0	0	0	0	2	2	2	2	1	0	2	2	1	2	1	0	0	2	2	0	0	2	1	0	1	0	0	0	0	2	0	0	0	2	1	0	1
LAMA4	Q16363	Laminin subunit alpha-4 OS=Homo sapiens GN=LAMA4 PE=1 SV=4	Laminin subunit alpha-4	11	11	11	1	11	11	11	2	0	0	0	0	0	0	0	5	3	0	3	0	0	3	4	1	0	0	5	1	0	5	0	0	0	0	0	0	0	0	0	0	5	0	0	1	0	2
LAMA5	O15230	Laminin subunit alpha-5 OS=Homo sapiens GN=LAMA5 PE=1 SV=8	Laminin subunit alpha-5	21	21	21	1	21	21	21	0	1	0	0	1	0	4	8	15	15	0	0	1	1	0	1	0	1	0	15	4	0	0	1	0	1	1	0	1	0	0	6	0	0	0	0	1	0	5
LAMB1	P07942	Laminin subunit beta-1 OS=Homo sapiens GN=LAMB1 PE=1 SV=2	Laminin subunit beta-1	22	22	22	1	22	22	22	8	1	8	6	9	2	10	13	18	16	1	8	4	4	8	9	8	0	0	20	10	1	17	1	1	0	0	0	0	0	0	5	1	11	0	4	5	0	12
LAMB2	P55268	Laminin subunit beta-2 OS=Homo sapiens GN=LAMB2 PE=1 SV=2	Laminin subunit beta-2	4	4	4	1	4	4	4	0	0	2	1	2	0	3	2	4	3	0	0	1	0	0	0	0	0	0	2	0	0	0	0	0	0	0	0	0	0	0	0	0	0	0	0	0	0	0
LAMC1	P11047	Laminin subunit gamma-1 OS=Homo sapiens GN=LAMC1 PE=1 SV=3	Laminin subunit gamma-1	25	25	25	1	25	25	25	8	0	5	3	8	0	13	16	22	15	1	11	4	7	13	8	10	1	3	17	7	0	18	5	1	1	1	1	1	0	1	6	0	16	1	2	2	0	10
LAMP1	P11279	Lysosome-associated membrane glycoprotein 1 OS=Homo sapiens GN=LAMP1 PE=1 SV=3	Lysosome-associated membrane glycoprotein 1	7	7	7	1	7	7	7	7	3	7	7	6	4	7	6	6	7	4	7	7	6	6	6	5	3	2	2	1	2	6	3	3	2	3	3	1	2	2	5	1	7	1	6	5	2	4
LAMP2	P13473	Lysosome-associated membrane glycoprotein 2 OS=Homo sapiens GN=LAMP2 PE=1 SV=2	Lysosome-associated membrane glycoprotein 2	4	4	4	1	4	4	4	4	1	4	4	4	3	4	3	4	4	2	4	3	4	4	4	3	0	1	1	1	1	4	2	2	2	3	1	1	2	2	2	1	4	0	4	4	0	4
LAMTOR1	Q6IAA8	Ragulator complex protein LAMTOR1 OS=Homo sapiens GN=LAMTOR1 PE=1 SV=2	Ragulator complex protein LAMTOR1	6	6	6	1	6	6	6	4	0	4	3	5	3	3	2	4	1	1	4	2	2	2	2	2	0	0	2	0	0	4	1	1	0	0	0	1	0	0	2	0	3	0	3	2	0	1
LAMTOR2	Q9Y2Q5	Ragulator complex protein LAMTOR2 OS=Homo sapiens GN=LAMTOR2 PE=1 SV=1	Ragulator complex protein LAMTOR2	3	3	3	1	3	3	3	2	0	2	2	2	0	2	2	2	1	1	2	1	1	1	1	0	0	0	1	0	0	2	1	0	1	0	1	0	0	0	2	0	1	0	1	0	0	0
LAMTOR5	O43504	Ragulator complex protein LAMTOR5 OS=Homo sapiens GN=LAMTOR5 PE=1 SV=1	Ragulator complex protein LAMTOR5	2	2	2	1	2	2	2	2	0	2	2	2	1	2	2	2	2	0	2	1	2	2	1	0	0	0	0	0	0	2	0	1	0	1	0	0	0	0	1	0	1	0	2	2	0	1
LAP3	P28838	Cytosol aminopeptidase OS=Homo sapiens GN=LAP3 PE=1 SV=3	Cytosol aminopeptidase	8	8	8	1	8	8	8	6	0	8	7	7	3	5	3	5	5	0	6	4	6	5	6	1	0	0	0	0	0	2	1	2	0	1	0	0	0	0	3	0	0	0	4	3	0	1
LAPTM4A	Q15012	Lysosomal-associated transmembrane protein 4A OS=Homo sapiens GN=LAPTM4A PE=1 SV=1	Lysosomal-associated transmembrane protein 4A	2	2	2	1	2	2	2	2	0	0	1	1	0	2	1	1	2	0	2	0	2	2	1	1	0	0	1	1	0	0	0	0	0	0	0	0	0	0	0	0	1	0	0	0	0	0
LARS	Q9P2J5	Leucine--tRNA ligase, cytoplasmic OS=Homo sapiens GN=LARS PE=1 SV=2	Leucine--tRNA ligase, cytoplasmic	19	19	19	1	19	19	19	7	0	7	9	8	0	8	8	17	13	0	5	5	7	4	4	1	0	0	1	0	0	4	0	3	0	3	0	0	0	1	8	0	1	0	3	2	0	1
LAS1L	Q9Y4W2	Ribosomal biogenesis protein LAS1L OS=Homo sapiens GN=LAS1L PE=1 SV=2	Ribosomal biogenesis protein LAS1L	3	3	3	1	3	3	3	0	0	0	0	0	0	1	0	3	3	0	0	0	0	1	0	0	0	0	0	0	0	0	0	0	1	0	0	0	0	0	1	0	0	0	0	0	0	0
LASP1	Q14847	LIM and SH3 domain protein 1 OS=Homo sapiens GN=LASP1 PE=1 SV=2	LIM and SH3 domain protein 1	5	5	5	1	5	5	5	4	0	5	5	5	4	4	4	5	4	1	4	2	3	4	3	2	0	0	0	0	0	4	0	4	2	3	1	1	0	1	3	0	3	0	5	2	0	2
LCN1	P31025	Lipocalin-1 OS=Homo sapiens GN=LCN1 PE=1 SV=1;Putative lipocalin 1-like protein 1 OS=Homo sapiens GN=LCN1P1 PE=5 SV=1	Lipocalin-1;Putative lipocalin 1-like protein 1	2;1	2;1	2;1	2	2	2	2	2	2	2	2	2	1	2	2	2	2	2	2	2	2	2	2	2	2	2	2	1	2	2	2	2	2	1	1	2	1	1	2	1	2	1	2	2	1	2
LDHA	P00338	L-lactate dehydrogenase A chain OS=Homo sapiens GN=LDHA PE=1 SV=2	L-lactate dehydrogenase A chain	16	15	15	1	16	15	15	13	4	15	14	15	6	16	15	14	13	6	12	10	9	9	8	6	4	2	8	5	2	12	5	8	7	7	4	4	2	6	6	3	11	2	7	8	2	8
LDHB	P07195	L-lactate dehydrogenase B chain OS=Homo sapiens GN=LDHB PE=1 SV=2	L-lactate dehydrogenase B chain	19;1;1	19;1;1	18;0;0	3	19	19	18	17	2	19	17	18	13	16	14	17	16	7	16	11	13	12	9	7	1	1	9	4	1	11	3	14	10	10	8	7	3	7	6	1	10	5	7	7	1	8
LDLR	P01130	Low-density lipoprotein receptor OS=Homo sapiens GN=LDLR PE=1 SV=1	Low-density lipoprotein receptor	2	2	2	1	2	2	2	2	0	1	1	2	0	2	0	0	0	0	2	0	1	2	2	1	0	0	0	0	0	2	0	0	0	0	0	0	0	0	1	0	1	0	2	1	1	1
LEMD2	Q8NC56	LEM domain-containing protein 2 OS=Homo sapiens GN=LEMD2 PE=1 SV=1	LEM domain-containing protein 2	2	2	2	1	2	2	2	2	0	2	2	2	1	1	1	1	2	0	1	0	2	2	2	0	0	0	0	0	0	1	0	0	0	0	0	0	0	0	0	0	0	0	0	0	0	0
LEPRE1	Q32P28	Prolyl 3-hydroxylase 1 OS=Homo sapiens GN=LEPRE1 PE=1 SV=2	Prolyl 3-hydroxylase 1	4	4	4	1	4	4	4	1	0	1	1	1	1	2	1	4	3	1	1	2	3	2	3	0	0	0	2	1	1	1	0	1	0	1	0	0	0	0	0	0	0	0	0	1	0	0
LGALS1	P09382	Galectin-1 OS=Homo sapiens GN=LGALS1 PE=1 SV=2	Galectin-1	11	11	11	1	11	11	11	10	4	10	10	10	7	10	10	10	9	6	10	8	10	9	8	7	6	5	7	5	1	10	4	9	8	8	8	4	2	7	7	1	9	3	10	10	5	10
LGALS3	P17931	Galectin-3 OS=Homo sapiens GN=LGALS3 PE=1 SV=5	Galectin-3	7	7	7	1	7	7	7	6	0	6	7	6	3	6	5	5	5	2	6	5	6	5	6	4	1	0	3	1	0	6	2	5	1	4	1	0	0	0	2	0	7	1	5	6	0	5
LGALS3BP	Q08380	Galectin-3-binding protein OS=Homo sapiens GN=LGALS3BP PE=1 SV=1	Galectin-3-binding protein	15	15	15	1	15	15	15	8	5	4	4	8	0	7	6	7	11	3	8	5	6	6	4	5	3	7	12	9	4	6	7	0	2	1	0	2	0	1	2	0	9	0	4	4	0	7
LGALS7	P47929	Galectin-7 OS=Homo sapiens GN=LGALS7 PE=1 SV=2	Galectin-7	6	6	6	1	6	6	6	6	4	4	4	4	4	5	4	4	4	4	4	4	4	4	4	4	3	3	3	4	3	4	5	4	3	3	2	2	3	2	4	3	5	2	4	5	3	5
LIN7C	Q9NUP9	Protein lin-7 homolog C OS=Homo sapiens GN=LIN7C PE=1 SV=1;Protein lin-7 homolog A OS=Homo sapiens GN=LIN7A PE=1 SV=2	Protein lin-7 homolog C;Protein lin-7 homolog A	6;3;1	6;3;1	6;3;1	3	6	6	6	2	0	5	3	4	1	1	1	2	1	0	3	0	3	4	2	0	0	0	0	0	0	2	0	1	0	1	0	0	0	0	0	0	0	0	2	2	0	2
LMAN1	P49257	Protein ERGIC-53 OS=Homo sapiens GN=LMAN1 PE=1 SV=2	Protein ERGIC-53	6	6	6	1	6	6	6	1	0	3	4	4	2	5	6	6	5	0	2	2	2	1	2	1	0	0	1	0	0	2	0	1	1	0	1	1	1	0	2	1	3	0	0	0	0	0
LMAN2	Q12907	Vesicular integral-membrane protein VIP36 OS=Homo sapiens GN=LMAN2 PE=1 SV=1	Vesicular integral-membrane protein VIP36	6	6	6	1	6	6	6	4	0	3	4	3	1	4	3	6	4	0	3	3	3	2	1	0	0	0	0	0	0	2	0	1	0	0	0	0	0	0	0	0	1	0	1	1	0	1
LMNA	P02545	Prelamin-A/C OS=Homo sapiens GN=LMNA PE=1 SV=1	Prelamin-A/C;Lamin-A/C	27	27	26	1	27	27	26	23	7	25	25	24	18	22	23	26	24	11	19	21	16	14	12	18	4	1	2	3	1	18	10	19	7	15	5	1	1	6	11	4	17	2	16	14	0	14
LMNB1	P20700	Lamin-B1 OS=Homo sapiens GN=LMNB1 PE=1 SV=2	Lamin-B1	13	12	12	1	13	12	12	6	0	10	10	11	4	11	8	9	10	0	2	4	4	2	0	1	0	1	0	0	0	2	0	5	1	4	1	0	0	0	4	0	2	0	2	3	0	1
LMNB2	Q03252	Lamin-B2 OS=Homo sapiens GN=LMNB2 PE=1 SV=3	Lamin-B2	7	6	6	1	7	6	6	4	1	6	6	7	4	6	3	3	4	0	2	1	2	2	2	2	0	0	0	0	1	2	0	1	2	1	0	1	0	1	1	0	2	0	2	1	0	0
LOXL1	Q08397	Lysyl oxidase homolog 1 OS=Homo sapiens GN=LOXL1 PE=1 SV=2	Lysyl oxidase homolog 1	2	2	2	1	2	2	2	2	0	0	0	0	0	0	0	0	0	0	2	0	2	2	2	0	0	0	0	0	0	2	0	0	0	0	0	0	0	0	0	0	2	1	2	2	1	2
LOXL2	Q9Y4K0	Lysyl oxidase homolog 2 OS=Homo sapiens GN=LOXL2 PE=1 SV=1	Lysyl oxidase homolog 2	3	3	3	1	3	3	3	1	0	1	0	2	0	2	2	3	3	0	3	0	0	0	0	0	0	0	1	1	0	3	0	0	0	0	0	0	0	0	0	0	3	0	0	1	0	0
LPAR1	Q92633	Lysophosphatidic acid receptor 1 OS=Homo sapiens GN=LPAR1 PE=1 SV=3	Lysophosphatidic acid receptor 1	4	4	4	1	4	4	4	4	1	2	2	2	1	3	3	3	2	0	4	1	4	4	3	3	0	0	1	1	0	2	0	1	1	1	0	0	0	0	0	0	2	0	2	2	0	1
LPP	Q93052	Lipoma-preferred partner OS=Homo sapiens GN=LPP PE=1 SV=1	Lipoma-preferred partner	4	4	4	1	4	4	4	4	0	4	4	3	3	3	4	4	4	0	4	1	2	4	0	0	0	0	0	0	0	0	0	1	0	1	0	0	0	0	1	0	0	0	1	1	0	1
LRP1	Q07954	Prolow-density lipoprotein receptor-related protein 1 OS=Homo sapiens GN=LRP1 PE=1 SV=2	Prolow-density lipoprotein receptor-related protein 1;Low-density lipoprotein receptor-related protein 1 85 kDa subunit;Low-density lipoprotein receptor-related protein 1 515 kDa subunit;Low-density lipoprotein receptor-related protein 1 intracellular domain	40	40	40	1	40	40	40	30	1	30	28	30	13	25	25	26	22	1	33	4	27	28	30	22	3	2	20	0	1	30	2	12	4	9	1	0	1	0	6	1	27	0	15	14	0	15
LRP10	Q7Z4F1	Low-density lipoprotein receptor-related protein 10 OS=Homo sapiens GN=LRP10 PE=1 SV=2	Low-density lipoprotein receptor-related protein 10	2	2	2	1	2	2	2	2	0	0	0	0	0	0	0	0	0	0	2	0	0	2	1	0	0	0	1	0	0	0	0	0	0	0	0	0	0	0	0	0	0	0	0	0	0	0
LRP4	O75096	Low-density lipoprotein receptor-related protein 4 OS=Homo sapiens GN=LRP4 PE=1 SV=4	Low-density lipoprotein receptor-related protein 4	2	2	2	1	2	2	2	0	1	1	1	0	0	0	0	0	0	0	0	0	0	0	0	0	0	1	0	0	2	0	0	0	0	0	0	0	0	0	0	1	0	0	1	1	0	1
LRPAP1	P30533	Alpha-2-macroglobulin receptor-associated protein OS=Homo sapiens GN=LRPAP1 PE=1 SV=1	Alpha-2-macroglobulin receptor-associated protein	8	8	8	1	8	8	8	6	0	8	7	7	5	7	8	7	8	0	3	5	3	3	1	1	0	0	0	0	0	2	0	4	1	5	0	0	0	0	2	0	1	0	0	1	0	0
LRRC15	Q8TF66	Leucine-rich repeat-containing protein 15 OS=Homo sapiens GN=LRRC15 PE=1 SV=2	Leucine-rich repeat-containing protein 15	3	3	3	1	3	3	3	3	0	1	2	1	0	1	1	1	1	0	3	0	3	3	1	0	0	0	0	0	0	2	0	1	0	0	0	0	0	0	0	0	2	0	0	0	0	1
LRRC17	Q8N6Y2	Leucine-rich repeat-containing protein 17 OS=Homo sapiens GN=LRRC17 PE=2 SV=1	Leucine-rich repeat-containing protein 17	15	15	15	1	15	15	15	0	0	1	0	1	1	1	1	2	2	1	1	1	1	1	1	1	0	0	14	12	0	0	1	1	1	1	0	0	1	0	0	0	1	0	1	1	0	0
LRRC47	Q8N1G4	Leucine-rich repeat-containing protein 47 OS=Homo sapiens GN=LRRC47 PE=1 SV=1	Leucine-rich repeat-containing protein 47	2	2	2	1	2	2	2	2	0	1	2	2	0	1	0	2	2	0	1	0	1	1	0	0	0	0	0	0	0	0	0	0	0	0	0	0	0	0	0	0	0	0	0	0	0	0
LRRC57	Q8N9N7	Leucine-rich repeat-containing protein 57 OS=Homo sapiens GN=LRRC57 PE=1 SV=1	Leucine-rich repeat-containing protein 57	5	5	5	1	5	5	5	5	1	5	5	4	1	4	1	3	1	0	4	1	5	4	4	1	0	0	0	0	0	3	0	1	2	1	0	0	0	0	1	0	0	0	3	2	0	0
LRRC59	Q96AG4	Leucine-rich repeat-containing protein 59 OS=Homo sapiens GN=LRRC59 PE=1 SV=1	Leucine-rich repeat-containing protein 59	8	8	8	1	8	8	8	4	0	6	6	6	1	6	4	7	6	0	4	4	5	4	2	0	0	0	0	0	0	2	0	2	0	1	0	0	1	0	2	0	0	0	1	1	0	1
LRRC8A	Q8IWT6	Volume-regulated anion channel subunit LRRC8A OS=Homo sapiens GN=LRRC8A PE=1 SV=1	Volume-regulated anion channel subunit LRRC8A	10	10	9	1	10	10	9	6	0	8	9	10	3	10	5	5	7	0	7	4	2	4	1	1	0	0	0	0	0	5	0	4	0	1	0	0	0	1	2	0	1	0	1	1	0	1
LRRC8E	Q6NSJ5	Volume-regulated anion channel subunit LRRC8E OS=Homo sapiens GN=LRRC8E PE=1 SV=2	Volume-regulated anion channel subunit LRRC8E	3	3	3	1	3	3	3	0	0	3	3	3	0	2	1	1	2	0	0	0	0	0	0	0	0	0	0	0	0	0	0	0	0	1	0	0	0	0	1	0	0	0	0	0	0	1
LSM12	Q3MHD2	Protein LSM12 homolog OS=Homo sapiens GN=LSM12 PE=1 SV=2	Protein LSM12 homolog	2	2	2	1	2	2	2	1	0	2	2	2	1	2	2	2	2	1	1	1	1	1	1	0	0	0	0	0	0	1	0	1	0	1	0	0	0	0	2	0	1	0	1	1	0	0
LSM2	Q9Y333	U6 snRNA-associated Sm-like protein LSm2 OS=Homo sapiens GN=LSM2 PE=1 SV=1	U6 snRNA-associated Sm-like protein LSm2	2	2	2	1	2	2	2	1	0	1	1	2	0	2	1	2	2	0	1	1	1	1	1	0	0	0	0	0	0	1	1	0	0	0	0	0	0	0	1	0	1	0	1	1	0	1
LSM6	P62312	U6 snRNA-associated Sm-like protein LSm6 OS=Homo sapiens GN=LSM6 PE=1 SV=1	U6 snRNA-associated Sm-like protein LSm6	2	2	2	1	2	2	2	2	0	2	2	2	1	2	1	1	2	0	1	1	2	1	2	0	0	0	0	0	0	0	0	2	0	2	0	0	0	0	1	0	0	0	1	1	0	0
LSM8	O95777	U6 snRNA-associated Sm-like protein LSm8 OS=Homo sapiens GN=LSM8 PE=1 SV=3	U6 snRNA-associated Sm-like protein LSm8	2	2	2	1	2	2	2	0	0	1	1	1	0	1	1	1	1	0	0	0	0	0	1	0	0	0	0	0	0	0	0	1	0	1	0	0	0	1	0	0	0	0	0	0	0	2
LSR	Q86X29	Lipolysis-stimulated lipoprotein receptor OS=Homo sapiens GN=LSR PE=1 SV=4	Lipolysis-stimulated lipoprotein receptor	2	2	2	1	2	2	2	0	0	2	2	2	0	1	2	2	2	0	0	1	0	0	1	0	1	0	0	0	0	0	0	1	0	0	0	0	0	0	1	1	0	0	1	1	0	0
LTA4H	P09960	Leukotriene A-4 hydrolase OS=Homo sapiens GN=LTA4H PE=1 SV=2	Leukotriene A-4 hydrolase	10	10	10	1	10	10	10	8	0	10	6	8	3	7	6	5	7	1	6	2	6	4	5	4	0	0	0	0	0	5	0	3	0	0	1	0	0	0	1	0	3	0	3	2	0	0
LTF	P02788	Lactotransferrin OS=Homo sapiens GN=LTF PE=1 SV=6	Lactotransferrin;Lactoferricin-H;Kaliocin-1;Lactoferroxin-A;Lactoferroxin-B;Lactoferroxin-C	12	10	10	1	12	10	10	9	7	10	9	10	4	9	7	4	8	6	10	10	8	9	9	7	2	3	5	3	5	9	7	4	1	2	0	1	2	1	10	4	9	1	12	11	0	10
LUC7L3	O95232	Luc7-like protein 3 OS=Homo sapiens GN=LUC7L3 PE=1 SV=2	Luc7-like protein 3	2	2	2	1	2	2	2	0	0	1	0	0	0	0	1	2	1	0	0	0	0	0	0	0	0	0	0	0	0	0	0	0	0	0	0	0	0	0	0	0	0	0	0	0	0	0
LYN	P07948	Tyrosine-protein kinase Lyn OS=Homo sapiens GN=LYN PE=1 SV=3;Tyrosine-protein kinase HCK OS=Homo sapiens GN=HCK PE=1 SV=5	Tyrosine-protein kinase Lyn;Tyrosine-protein kinase HCK	4;2	3;1	3;1	2	4	3	3	4	0	4	3	4	1	1	1	3	0	0	4	0	4	3	4	0	0	0	1	0	0	1	0	1	1	0	0	0	0	0	0	0	0	0	1	2	0	1
LYPLA2	O95372	Acyl-protein thioesterase 2 OS=Homo sapiens GN=LYPLA2 PE=1 SV=1	Acyl-protein thioesterase 2	2	2	2	1	2	2	2	1	0	1	1	0	1	1	1	0	0	0	0	0	1	1	1	0	0	0	0	0	0	1	0	0	0	1	1	0	0	0	0	0	0	0	0	0	0	0
LYZ	P61626	Lysozyme C OS=Homo sapiens GN=LYZ PE=1 SV=1	Lysozyme C	3	3	3	1	3	3	3	3	2	3	2	3	2	2	2	3	3	3	2	2	2	2	2	3	3	2	3	2	3	2	2	3	2	1	3	2	2	3	3	3	3	2	3	3	3	2
M6PR	P20645	Cation-dependent mannose-6-phosphate receptor OS=Homo sapiens GN=M6PR PE=1 SV=1	Cation-dependent mannose-6-phosphate receptor	8	8	8	1	8	8	8	4	0	4	5	5	5	5	5	7	6	1	3	5	2	2	1	2	0	1	1	0	0	2	0	3	0	3	2	0	0	2	5	0	3	0	2	3	0	2
MACF1	Q9UPN3	Microtubule-actin cross-linking factor 1, isoforms 1/2/3/5 OS=Homo sapiens GN=MACF1 PE=1 SV=4	Microtubule-actin cross-linking factor 1, isoforms 1/2/3/5	7	6	6	1	7	6	6	4	1	4	4	4	3	4	1	1	2	1	2	1	2	1	3	1	0	0	0	1	0	1	1	3	1	1	0	0	0	0	1	0	1	0	1	1	0	1
MAGED1	Q9Y5V3	Melanoma-associated antigen D1 OS=Homo sapiens GN=MAGED1 PE=1 SV=3;Melanoma-associated antigen D2 OS=Homo sapiens GN=MAGED2 PE=1 SV=2	Melanoma-associated antigen D1;Melanoma-associated antigen D2	2;1	2;1	2;1	2	2	2	2	0	0	0	0	1	0	1	1	1	1	0	0	0	0	0	0	0	0	0	0	0	0	0	0	0	0	0	0	0	0	0	0	0	0	0	0	0	0	0
MAMDC2	Q7Z304	MAM domain-containing protein 2 OS=Homo sapiens GN=MAMDC2 PE=2 SV=3	MAM domain-containing protein 2	30	30	30	1	30	30	30	1	5	1	0	1	0	0	0	2	0	0	5	0	2	2	1	1	0	5	25	20	5	4	12	1	0	1	1	0	0	0	0	2	9	0	1	1	0	3
MAN2A1	Q16706	Alpha-mannosidase 2 OS=Homo sapiens GN=MAN2A1 PE=1 SV=2	Alpha-mannosidase 2	4	4	4	1	4	4	4	3	0	2	1	2	0	2	3	4	4	0	1	0	1	1	1	1	0	0	0	0	0	2	0	0	0	0	0	0	0	0	1	0	0	0	1	0	0	0
MAN2B1	O00754	Lysosomal alpha-mannosidase OS=Homo sapiens GN=MAN2B1 PE=1 SV=3	Lysosomal alpha-mannosidase;Lysosomal alpha-mannosidase A peptide;Lysosomal alpha-mannosidase B peptide;Lysosomal alpha-mannosidase C peptide;Lysosomal alpha-mannosidase D peptide;Lysosomal alpha-mannosidase E peptide	6	6	6	1	6	6	6	3	0	5	5	6	1	5	3	5	3	2	4	5	5	4	4	3	0	0	1	0	0	6	2	1	0	2	0	0	0	0	1	0	5	0	3	3	0	2
MANF	P55145	Mesencephalic astrocyte-derived neurotrophic factor OS=Homo sapiens GN=MANF PE=1 SV=3	Mesencephalic astrocyte-derived neurotrophic factor	4	4	4	1	4	4	4	3	0	3	2	4	3	3	2	4	3	1	1	3	3	3	3	0	0	0	0	0	0	1	0	3	0	1	0	1	0	0	2	0	1	0	0	1	0	0
MAP1B	P46821	Microtubule-associated protein 1B OS=Homo sapiens GN=MAP1B PE=1 SV=2	Microtubule-associated protein 1B;MAP1B heavy chain;MAP1 light chain LC1	5;1	5;1	5;1	2	5	5	5	4	1	4	4	4	0	4	4	4	4	0	3	3	4	3	4	2	1	0	1	0	1	4	1	1	0	0	0	0	1	0	4	1	3	1	5	4	0	4
MAP1LC3B	Q9GZQ8	Microtubule-associated proteins 1A/1B light chain 3B OS=Homo sapiens GN=MAP1LC3B PE=1 SV=3;Microtubule-associated proteins 1A/1B light chain 3 beta 2 OS=Homo sapiens GN=MAP1LC3B2 PE=2 SV=1	Microtubule-associated proteins 1A/1B light chain 3B;Microtubule-associated proteins 1A/1B light chain 3 beta 2	2;2	2;2	1;1	2	2	2	1	2	0	2	1	2	0	2	0	2	1	0	2	1	1	2	0	0	0	0	0	0	0	1	0	0	0	1	0	0	0	0	2	0	1	0	2	1	0	2
MAP2K2	P36507	Dual specificity mitogen-activated protein kinase kinase 2 OS=Homo sapiens GN=MAP2K2 PE=1 SV=1	Dual specificity mitogen-activated protein kinase kinase 2	2	2	2	1	2	2	2	1	0	2	1	1	0	0	0	2	2	0	1	0	1	1	0	0	0	0	0	0	0	0	0	1	0	1	0	0	0	0	0	0	0	0	0	0	0	0
MAP4K4	O95819	Mitogen-activated protein kinase kinase kinase kinase 4 OS=Homo sapiens GN=MAP4K4 PE=1 SV=2;TRAF2 and NCK-interacting protein kinase OS=Homo sapiens GN=TNIK PE=1 SV=1	Mitogen-activated protein kinase kinase kinase kinase 4;TRAF2 and NCK-interacting protein kinase	5;3	5;3	2;0	2	5	5	2	4	0	3	5	4	0	2	0	3	2	0	4	1	4	5	5	3	0	0	0	0	0	3	0	0	0	1	1	0	0	0	0	0	2	0	1	1	0	1
MAPK1	P28482	Mitogen-activated protein kinase 1 OS=Homo sapiens GN=MAPK1 PE=1 SV=3	Mitogen-activated protein kinase 1	2	2	2	1	2	2	2	2	0	2	1	2	1	2	2	2	2	0	2	1	1	1	0	0	0	0	0	0	0	0	0	1	0	0	0	0	0	0	0	0	0	0	0	0	0	0
MAPRE1	Q15691	Microtubule-associated protein RP/EB family member 1 OS=Homo sapiens GN=MAPRE1 PE=1 SV=3	Microtubule-associated protein RP/EB family member 1	7	7	7	1	7	7	7	6	0	6	5	6	3	6	6	7	6	0	6	3	3	4	1	0	0	0	0	0	0	2	0	4	1	3	0	1	1	1	1	0	1	0	2	0	0	0
MARCKS	P29966	Myristoylated alanine-rich C-kinase substrate OS=Homo sapiens GN=MARCKS PE=1 SV=4	Myristoylated alanine-rich C-kinase substrate	6	6	6	1	6	6	6	6	1	6	5	5	5	4	3	2	2	0	6	2	4	5	3	2	1	1	1	1	0	5	1	5	2	4	2	0	0	1	1	0	4	0	5	5	0	1
MARS	P56192	Methionine--tRNA ligase, cytoplasmic OS=Homo sapiens GN=MARS PE=1 SV=2	Methionine--tRNA ligase, cytoplasmic	12	12	12	1	12	12	12	7	0	6	6	8	4	8	6	12	12	1	2	3	4	5	3	0	0	0	1	1	0	1	0	4	0	2	0	0	0	0	4	1	0	0	1	0	1	0
MAT2A	P31153	S-adenosylmethionine synthase isoform type-2 OS=Homo sapiens GN=MAT2A PE=1 SV=1	S-adenosylmethionine synthase isoform type-2	3	3	3	1	3	3	3	2	0	2	2	2	0	2	1	1	1	0	2	1	2	2	2	1	0	0	0	0	0	2	0	0	0	0	0	0	0	0	2	0	2	0	1	1	0	0
MATR3	P43243	Matrin-3 OS=Homo sapiens GN=MATR3 PE=1 SV=2	Matrin-3	3	3	3	1	3	3	3	2	0	2	3	2	1	1	1	3	2	0	1	1	0	0	0	0	0	0	0	0	0	0	0	1	0	1	0	0	0	0	0	0	0	0	0	0	0	0
MCAM	P43121	Cell surface glycoprotein MUC18 OS=Homo sapiens GN=MCAM PE=1 SV=2	Cell surface glycoprotein MUC18	25	25	25	1	25	25	25	22	0	23	23	23	13	16	15	18	16	5	21	8	18	17	12	6	2	2	5	0	0	13	1	13	5	7	4	2	0	1	2	1	9	0	14	13	2	8
MCM2	P49736	DNA replication licensing factor MCM2 OS=Homo sapiens GN=MCM2 PE=1 SV=4	DNA replication licensing factor MCM2	3	3	3	1	3	3	3	0	0	1	1	1	0	0	0	3	3	0	0	0	0	0	0	0	0	0	0	0	0	0	0	0	0	0	0	0	0	0	1	0	0	0	0	0	0	0
MCM3	P25205	DNA replication licensing factor MCM3 OS=Homo sapiens GN=MCM3 PE=1 SV=3	DNA replication licensing factor MCM3	8	8	8	1	8	8	8	1	0	2	2	2	0	3	2	8	6	0	0	1	0	0	0	0	0	0	0	0	0	0	0	1	0	1	1	0	0	1	2	0	0	0	0	0	0	0
MCM4	P33991	DNA replication licensing factor MCM4 OS=Homo sapiens GN=MCM4 PE=1 SV=5	DNA replication licensing factor MCM4	6	6	6	1	6	6	6	0	0	2	2	1	0	2	3	6	6	0	0	1	0	0	0	0	0	0	0	0	0	0	0	1	0	0	0	1	0	0	1	0	0	0	0	0	0	0
MCM5	P33992	DNA replication licensing factor MCM5 OS=Homo sapiens GN=MCM5 PE=1 SV=5	DNA replication licensing factor MCM5	4	4	4	1	4	4	4	0	0	1	1	1	0	0	0	4	4	0	0	0	0	0	0	0	0	0	0	0	0	0	0	0	0	0	0	0	0	0	0	0	0	0	0	0	0	0
MCM6	Q14566	DNA replication licensing factor MCM6 OS=Homo sapiens GN=MCM6 PE=1 SV=1	DNA replication licensing factor MCM6	6	6	6	1	6	6	6	0	0	2	1	3	0	0	1	6	3	0	0	0	0	0	0	0	0	0	0	0	0	0	0	0	0	0	0	0	0	0	0	0	0	0	0	0	0	0
MCM7	P33993	DNA replication licensing factor MCM7 OS=Homo sapiens GN=MCM7 PE=1 SV=4	DNA replication licensing factor MCM7	5	5	5	1	5	5	5	0	0	1	2	1	0	0	2	5	3	0	0	0	0	0	0	1	0	0	0	0	0	0	0	1	0	1	0	0	0	0	1	0	0	0	0	0	0	0
MDH1	P40925	Malate dehydrogenase, cytoplasmic OS=Homo sapiens GN=MDH1 PE=1 SV=4	Malate dehydrogenase, cytoplasmic	10	10	10	1	10	10	10	9	1	10	9	10	6	8	7	8	8	1	9	6	8	6	6	3	1	0	0	0	1	7	1	6	2	3	2	2	1	2	4	0	8	0	6	4	0	3
MDH2	P40926	Malate dehydrogenase, mitochondrial OS=Homo sapiens GN=MDH2 PE=1 SV=3	Malate dehydrogenase, mitochondrial	14	14	14	1	14	14	14	9	5	9	8	9	5	10	10	13	11	3	9	9	9	7	10	7	1	0	2	1	0	9	5	7	3	6	0	2	2	1	7	1	8	0	6	6	1	5
MDK	P21741	Midkine OS=Homo sapiens GN=MDK PE=1 SV=1	Midkine	5	5	5	1	5	5	5	1	0	0	0	0	0	0	0	1	0	0	0	0	0	0	0	0	0	0	3	3	0	0	0	0	0	0	0	0	0	0	0	0	0	0	0	0	0	0
ME1	P48163	NADP-dependent malic enzyme OS=Homo sapiens GN=ME1 PE=1 SV=1	NADP-dependent malic enzyme	5	5	5	1	5	5	5	5	3	5	5	4	2	3	5	4	4	3	5	2	3	2	4	4	0	2	2	2	1	4	3	2	1	1	1	1	0	1	2	1	5	1	1	2	0	2
MED12	Q93074	Mediator of RNA polymerase II transcription subunit 12 OS=Homo sapiens GN=MED12 PE=1 SV=4;Mediator of RNA polymerase II transcription subunit 12-like protein OS=Homo sapiens GN=MED12L PE=1 SV=2	Mediator of RNA polymerase II transcription subunit 12;Mediator of RNA polymerase II transcription subunit 12-like protein	2;1	2;1	2;1	2	2	2	2	1	0	1	1	1	0	1	1	0	1	0	1	0	1	1	0	0	0	0	1	0	0	1	0	0	0	0	0	0	0	0	0	0	0	0	0	0	0	0
MEMO1	Q9Y316	Protein MEMO1 OS=Homo sapiens GN=MEMO1 PE=1 SV=1	Protein MEMO1	2	2	2	1	2	2	2	2	0	2	2	2	0	2	2	2	2	1	2	2	2	2	2	1	0	0	1	0	0	2	2	0	0	0	0	0	0	0	1	0	2	0	1	1	0	0
MESDC2	Q14696	LDLR chaperone MESD OS=Homo sapiens GN=MESDC2 PE=1 SV=2	LDLR chaperone MESD	3	3	3	1	3	3	3	0	0	3	3	2	2	3	3	3	2	0	0	2	2	1	2	1	0	0	1	1	0	1	1	3	0	0	0	0	0	1	1	0	0	0	0	0	0	0
MFGE8	Q08431	Lactadherin OS=Homo sapiens GN=MFGE8 PE=1 SV=2	Lactadherin;Lactadherin short form;Medin	25	25	25	1	25	25	25	24	9	23	23	22	12	16	15	17	14	6	24	13	22	23	20	19	7	9	15	11	4	23	9	11	8	11	6	4	3	7	6	4	21	3	25	25	12	21
MGLL	Q99685	Monoglyceride lipase OS=Homo sapiens GN=MGLL PE=1 SV=2	Monoglyceride lipase	2	2	2	1	2	2	2	1	0	2	0	1	0	0	0	1	0	0	1	0	1	0	1	0	0	0	0	0	0	1	0	0	0	0	0	0	0	0	0	0	1	0	1	0	0	1
MGST1	P10620	Microsomal glutathione S-transferase 1 OS=Homo sapiens GN=MGST1 PE=1 SV=1	Microsomal glutathione S-transferase 1	2	2	2	1	2	2	2	1	0	2	2	1	0	1	2	2	1	0	1	1	2	2	2	0	0	0	0	0	0	0	0	0	0	0	0	0	0	0	1	0	1	0	0	0	0	0
MICA	Q29983	MHC class I polypeptide-related sequence A OS=Homo sapiens GN=MICA PE=1 SV=1	MHC class I polypeptide-related sequence A	4	4	4	1	4	4	4	2	0	3	3	4	3	2	2	3	2	0	2	2	2	2	1	0	0	0	1	0	0	2	0	3	0	1	0	0	0	0	0	0	1	0	3	1	0	1
MIF	P14174	Macrophage migration inhibitory factor OS=Homo sapiens GN=MIF PE=1 SV=4	Macrophage migration inhibitory factor	2	2	2	1	2	2	2	2	1	2	1	2	1	2	1	0	1	0	2	1	2	2	2	0	0	1	0	0	1	1	1	1	1	0	0	0	1	0	0	0	1	1	2	2	0	2
MITD1	Q8WV92	MIT domain-containing protein 1 OS=Homo sapiens GN=MITD1 PE=1 SV=1	MIT domain-containing protein 1	2	2	2	1	2	2	2	2	1	0	1	2	1	2	0	1	0	1	2	0	0	1	1	0	0	0	1	0	0	0	0	1	0	0	0	0	0	0	0	0	0	0	1	1	0	0
MLEC	Q14165	Malectin OS=Homo sapiens GN=MLEC PE=1 SV=1	Malectin	5	5	5	1	5	5	5	4	0	4	5	4	2	4	4	4	5	2	4	4	4	4	4	2	0	0	2	0	0	4	3	1	0	1	1	1	0	1	3	0	3	0	3	2	0	1
MLLT4	P55196	Afadin OS=Homo sapiens GN=MLLT4 PE=1 SV=3	Afadin	2	2	2	1	2	2	2	1	1	2	2	2	2	2	2	2	2	1	1	1	1	1	1	1	1	0	0	0	0	1	1	2	0	1	1	0	0	0	0	1	1	0	1	0	1	0
MME	P08473	Neprilysin OS=Homo sapiens GN=MME PE=1 SV=2	Neprilysin	19	19	19	1	19	19	19	16	1	17	16	15	7	11	10	12	11	1	18	8	15	15	11	7	0	0	5	0	1	13	2	9	5	6	0	0	0	0	5	0	12	0	13	10	0	10
MMP14	P50281	Matrix metalloproteinase-14 OS=Homo sapiens GN=MMP14 PE=1 SV=3	Matrix metalloproteinase-14	14;1	14;1	13;0	2	14	14	13	14	0	9	7	10	4	8	8	11	6	0	13	5	11	11	8	7	0	0	7	1	0	10	1	3	1	2	0	0	0	0	4	0	12	0	10	10	0	8
MMP2	P08253	72 kDa type IV collagenase OS=Homo sapiens GN=MMP2 PE=1 SV=2	72 kDa type IV collagenase;PEX	5	5	5	1	5	5	5	4	0	0	1	2	0	1	1	2	1	0	5	0	4	3	4	1	0	0	1	0	0	5	0	0	0	0	0	0	0	0	0	0	4	0	1	1	0	1
MOB1A	Q9H8S9	MOB kinase activator 1A OS=Homo sapiens GN=MOB1A PE=1 SV=4;MOB kinase activator 1B OS=Homo sapiens GN=MOB1B PE=1 SV=3	MOB kinase activator 1A;MOB kinase activator 1B	3;3	3;3	3;3	2	3	3	3	1	0	1	1	1	1	1	1	1	1	0	1	0	1	1	1	1	0	0	0	0	0	1	0	1	0	1	0	0	0	0	0	0	1	0	3	3	0	1
MON2	Q7Z3U7	Protein MON2 homolog OS=Homo sapiens GN=MON2 PE=1 SV=3	Protein MON2 homolog	2	2	2	1	2	2	2	1	0	1	2	2	1	1	0	1	1	0	0	0	1	1	0	0	0	0	0	0	0	0	0	1	0	0	0	0	0	0	0	0	0	0	0	0	0	0
MOXD1	Q6UVY6	DBH-like monooxygenase protein 1 OS=Homo sapiens GN=MOXD1 PE=2 SV=1	DBH-like monooxygenase protein 1	5	5	5	1	5	5	5	4	0	4	3	3	2	3	3	2	3	0	4	1	2	3	4	1	0	0	1	0	0	3	0	3	0	1	0	0	0	0	1	0	3	0	2	2	0	1
MPDU1	O75352	Mannose-P-dolichol utilization defect 1 protein OS=Homo sapiens GN=MPDU1 PE=1 SV=2	Mannose-P-dolichol utilization defect 1 protein	2	2	2	1	2	2	2	1	0	1	1	1	1	2	2	2	2	0	1	1	1	2	1	0	0	0	0	0	0	1	0	1	0	0	0	0	0	0	0	0	0	0	0	0	0	0
MPP5	Q8N3R9	MAGUK p55 subfamily member 5 OS=Homo sapiens GN=MPP5 PE=1 SV=3	MAGUK p55 subfamily member 5	3	3	3	1	3	3	3	2	0	2	2	2	0	1	1	1	1	0	1	0	2	1	0	0	0	0	0	0	0	0	0	1	0	0	0	0	0	0	0	0	0	0	0	0	0	0
MPP6	Q9NZW5	MAGUK p55 subfamily member 6 OS=Homo sapiens GN=MPP6 PE=1 SV=2	MAGUK p55 subfamily member 6	3	3	3	1	3	3	3	2	0	2	2	2	0	2	2	2	2	0	2	1	2	2	1	0	0	0	0	0	0	2	0	1	0	1	0	0	0	0	0	0	2	0	2	1	0	0
MPST	P25325	3-mercaptopyruvate sulfurtransferase OS=Homo sapiens GN=MPST PE=1 SV=3	3-mercaptopyruvate sulfurtransferase	7	7	7	1	7	7	7	4	0	6	5	5	2	4	2	6	6	0	3	2	1	2	0	1	0	0	0	0	0	1	0	1	0	1	1	0	0	0	0	0	0	0	1	2	0	1
MPZL1	O95297	Myelin protein zero-like protein 1 OS=Homo sapiens GN=MPZL1 PE=1 SV=1	Myelin protein zero-like protein 1	4	4	4	1	4	4	4	4	0	3	3	3	1	4	3	3	2	0	4	0	4	4	4	2	0	0	1	0	0	3	0	3	0	2	0	0	0	1	0	0	2	0	2	2	0	1
MRAS	O14807	Ras-related protein M-Ras OS=Homo sapiens GN=MRAS PE=1 SV=2	Ras-related protein M-Ras	2	2	2	1	2	2	2	2	0	1	1	1	0	1	0	1	1	0	2	0	2	2	1	0	0	0	0	0	0	2	0	0	0	0	0	0	0	0	0	0	2	0	0	0	0	0
MRE11A	P49959	Double-strand break repair protein MRE11A OS=Homo sapiens GN=MRE11A PE=1 SV=3	Double-strand break repair protein MRE11A	3	3	3	1	3	3	3	0	0	3	2	2	0	1	1	3	3	0	0	1	0	0	0	0	0	0	0	0	0	0	0	0	0	0	0	0	0	0	2	0	0	0	0	0	0	0
MSH2	P43246	DNA mismatch repair protein Msh2 OS=Homo sapiens GN=MSH2 PE=1 SV=1	DNA mismatch repair protein Msh2	2	2	2	1	2	2	2	0	0	1	2	0	0	0	1	2	1	0	0	0	0	0	0	0	0	0	0	0	0	0	0	0	0	0	0	0	0	0	0	0	0	0	0	0	0	1
MSN	P26038	Moesin OS=Homo sapiens GN=MSN PE=1 SV=3	Moesin	55	55	42	1	55	55	42	49	16	53	52	53	46	50	51	48	51	9	51	36	44	45	36	45	8	12	24	12	3	50	12	46	23	36	11	11	6	12	14	1	44	6	47	45	11	25
MTA2	O94776	Metastasis-associated protein MTA2 OS=Homo sapiens GN=MTA2 PE=1 SV=1	Metastasis-associated protein MTA2	6	6	5	1	6	6	5	1	1	2	1	1	0	1	4	6	5	1	1	1	0	0	0	1	0	0	0	0	0	1	0	1	0	0	0	0	0	0	1	0	1	0	0	0	0	0
MTAP	Q13126	S-methyl-5-thioadenosine phosphorylase OS=Homo sapiens GN=MTAP PE=1 SV=2	S-methyl-5-thioadenosine phosphorylase	2	2	2	1	2	2	2	2	0	2	2	2	0	2	1	2	2	0	1	1	2	2	1	0	0	0	0	0	0	2	0	0	0	0	0	0	0	0	2	0	1	0	2	2	0	2
MTCH2	Q9Y6C9	Mitochondrial carrier homolog 2 OS=Homo sapiens GN=MTCH2 PE=1 SV=1	Mitochondrial carrier homolog 2	2	2	2	1	2	2	2	1	0	0	0	0	0	0	0	2	2	0	0	0	0	0	0	1	0	0	0	0	0	0	0	0	0	0	0	0	0	0	0	0	0	0	0	0	0	0
MT-CO2	P00403	Cytochrome c oxidase subunit 2 OS=Homo sapiens GN=MT-CO2 PE=1 SV=1	Cytochrome c oxidase subunit 2	4	4	4	1	4	4	4	3	0	3	3	3	1	2	3	4	4	1	2	4	3	2	3	1	1	0	1	0	0	3	2	1	0	0	0	0	1	1	2	0	3	0	2	1	0	3
MTDH	Q86UE4	Protein LYRIC OS=Homo sapiens GN=MTDH PE=1 SV=2	Protein LYRIC	3	3	3	1	3	3	3	1	0	2	2	2	0	2	2	3	2	1	1	1	1	1	1	1	0	0	0	0	0	1	0	0	0	0	0	0	0	0	1	0	1	1	1	1	0	1
MTHFD1	P11586	C-1-tetrahydrofolate synthase, cytoplasmic OS=Homo sapiens GN=MTHFD1 PE=1 SV=3	C-1-tetrahydrofolate synthase, cytoplasmic;Methylenetetrahydrofolate dehydrogenase;Methenyltetrahydrofolate cyclohydrolase;Formyltetrahydrofolate synthetase;C-1-tetrahydrofolate synthase, cytoplasmic, N-terminally processed	26	26	26	1	26	26	26	15	0	17	18	17	2	15	13	22	20	5	13	8	15	13	9	4	0	0	5	2	0	9	2	8	2	9	0	0	1	2	11	0	5	0	7	7	0	5
MTPN	P58546	Myotrophin OS=Homo sapiens GN=MTPN PE=1 SV=2	Myotrophin	3	3	3	1	3	3	3	3	0	3	3	2	1	3	3	3	3	1	3	1	3	3	2	1	1	0	1	0	0	2	0	1	1	1	0	0	0	1	2	0	2	1	3	1	0	1
MUC5B	Q9HC84	Mucin-5B OS=Homo sapiens GN=MUC5B PE=1 SV=3	Mucin-5B	5	5	5	1	5	5	5	0	0	2	2	0	0	2	3	0	0	1	2	2	1	1	2	2	0	0	0	0	0	2	2	0	0	0	0	1	1	0	1	1	3	0	1	0	0	2
MVB12A	Q96EY5	Multivesicular body subunit 12A OS=Homo sapiens GN=MVB12A PE=1 SV=1	Multivesicular body subunit 12A	2	2	2	1	2	2	2	1	0	1	2	1	0	1	0	0	0	0	2	0	1	2	2	0	0	0	0	0	0	2	0	0	0	0	0	0	0	0	0	0	1	0	0	0	0	0
MVD	P53602	Diphosphomevalonate decarboxylase OS=Homo sapiens GN=MVD PE=1 SV=1	Diphosphomevalonate decarboxylase	5	5	5	1	5	5	5	3	0	4	5	3	1	3	3	5	3	0	3	2	3	3	3	1	1	0	0	0	0	2	1	2	0	1	0	0	0	0	4	0	0	0	4	3	0	1
MVK	Q03426	Mevalonate kinase OS=Homo sapiens GN=MVK PE=1 SV=1	Mevalonate kinase	2	2	2	1	2	2	2	2	0	1	1	1	0	2	0	2	2	0	0	2	2	2	2	0	0	0	0	0	0	0	0	0	0	0	0	0	0	0	1	0	0	0	0	0	0	0
MVP	Q14764	Major vault protein OS=Homo sapiens GN=MVP PE=1 SV=4	Major vault protein	46	46	46	1	46	46	46	37	6	29	28	36	11	26	22	40	35	25	37	26	30	26	26	13	1	1	26	37	3	31	14	13	2	16	2	1	2	5	22	4	28	0	19	21	0	13
MX1	P20591	Interferon-induced GTP-binding protein Mx1 OS=Homo sapiens GN=MX1 PE=1 SV=4	Interferon-induced GTP-binding protein Mx1;Interferon-induced GTP-binding protein Mx1, N-terminally processed	5;2	5;2	5;2	2	5	5	5	1	0	3	5	5	1	2	2	5	4	0	0	1	0	0	0	0	0	0	0	0	0	0	0	1	1	1	0	1	0	1	1	0	0	0	0	0	0	0
MXRA8	Q9BRK3	Matrix-remodeling-associated protein 8 OS=Homo sapiens GN=MXRA8 PE=2 SV=1	Matrix-remodeling-associated protein 8	5	5	5	1	5	5	5	4	0	0	1	3	0	0	0	1	0	0	4	0	4	5	4	0	0	0	3	1	0	4	0	0	1	0	0	0	0	0	0	0	3	0	1	1	0	0
MYADM	Q96S97	Myeloid-associated differentiation marker OS=Homo sapiens GN=MYADM PE=1 SV=2	Myeloid-associated differentiation marker	2	2	2	1	2	2	2	1	0	1	2	1	1	2	2	1	2	0	1	2	2	2	2	2	0	0	0	0	0	2	0	1	0	1	1	0	0	0	2	0	2	0	2	2	0	2
MYBBP1A	Q9BQG0	Myb-binding protein 1A OS=Homo sapiens GN=MYBBP1A PE=1 SV=2	Myb-binding protein 1A	3	3	3	1	3	3	3	0	0	0	0	0	0	0	0	3	3	0	0	0	0	0	0	0	0	0	0	0	0	0	0	0	1	0	0	0	0	0	0	0	0	0	0	0	0	0
MYDGF	Q969H8	UPF0556 protein C19orf10 OS=Homo sapiens GN=C19orf10 PE=1 SV=1	Myeloid-derived growth factor	3	3	3	1	3	3	3	2	0	2	2	2	3	2	3	3	3	2	3	2	1	2	1	2	0	0	0	0	0	2	0	2	1	1	2	0	1	1	2	1	2	0	3	3	0	3
MYH1	P12882	Myosin-1 OS=Homo sapiens GN=MYH1 PE=1 SV=3;Myosin-8 OS=Homo sapiens GN=MYH8 PE=1 SV=3	Myosin-1;Myosin-8	6;3;2	2;1;1	2;1;1	3	6	2	2	0	0	1	1	1	1	1	2	1	2	0	0	1	0	0	0	0	0	0	0	1	0	0	0	1	0	1	0	1	0	0	0	0	0	0	0	0	0	0
MYH10	P35580	Myosin-10 OS=Homo sapiens GN=MYH10 PE=1 SV=3	Myosin-10	48	33	29	1	48	33	29	25	0	46	40	43	15	42	40	46	38	2	21	18	13	15	11	2	2	0	7	3	0	11	0	15	2	9	6	0	0	5	11	0	8	0	9	4	1	3
MYH2	Q9UKX2	Myosin-2 OS=Homo sapiens GN=MYH2 PE=1 SV=1	Myosin-2	7	6	3	1	7	6	3	0	0	1	1	1	1	1	2	1	2	0	0	1	0	0	0	0	0	0	0	1	0	0	0	1	0	1	0	1	0	0	0	0	0	0	0	0	0	0
MYH9	P35579	Myosin-9 OS=Homo sapiens GN=MYH9 PE=1 SV=4	Myosin-9	118;1;1;1;1	118;1;1;1;1	101;1;0;0;0	5	118	118	101	96	12	109	101	104	61	103	96	110	105	35	89	62	53	47	40	30	5	5	42	17	1	68	13	64	22	48	14	13	5	19	36	3	59	4	58	51	10	36
MYL12A	P19105	Myosin regulatory light chain 12A OS=Homo sapiens GN=MYL12A PE=1 SV=2;Myosin regulatory light chain 12B OS=Homo sapiens GN=MYL12B PE=1 SV=2	Myosin regulatory light chain 12A;Myosin regulatory light chain 12B	9;9	9;9	4;4	2	9	9	4	8	2	9	7	9	5	7	8	9	8	5	8	8	6	6	5	4	0	0	4	1	0	8	3	2	2	4	2	1	0	4	5	1	8	0	5	4	0	5
MYL6	P60660	Myosin light polypeptide 6 OS=Homo sapiens GN=MYL6 PE=1 SV=2	Myosin light polypeptide 6	8	8	6	1	8	8	6	5	2	8	6	7	4	6	7	8	8	4	6	6	7	5	6	5	1	3	4	2	0	6	2	5	4	5	3	3	0	4	3	1	6	1	7	6	2	4
MYO10	Q9HD67	Unconventional myosin-X OS=Homo sapiens GN=MYO10 PE=1 SV=3	Unconventional myosin-X	8	8	8	1	8	8	8	6	0	0	0	0	0	0	0	1	0	0	8	0	7	8	8	3	0	0	0	0	0	6	0	0	0	0	1	0	0	0	0	0	3	1	2	1	0	2
MYO18A	Q92614	Unconventional myosin-XVIIIa OS=Homo sapiens GN=MYO18A PE=1 SV=3	Unconventional myosin-XVIIIa	2	2	2	1	2	2	2	1	0	2	1	1	1	1	0	2	2	0	0	0	0	0	0	0	0	0	0	0	0	0	0	0	0	1	0	0	0	0	1	0	0	0	0	0	0	0
MYO1B	O43795	Unconventional myosin-Ib OS=Homo sapiens GN=MYO1B PE=1 SV=3	Unconventional myosin-Ib	16;2	16;2	16;2	2	16	16	16	12	0	14	13	11	4	10	9	10	6	0	12	4	11	12	12	4	0	0	3	0	0	10	0	5	1	2	1	1	0	1	4	0	9	0	4	4	0	5
MYO1C	O00159	Unconventional myosin-Ic OS=Homo sapiens GN=MYO1C PE=1 SV=4	Unconventional myosin-Ic	32	32	32	1	32	32	32	31	1	31	31	29	14	18	18	24	15	3	31	12	28	26	24	13	3	1	9	5	1	20	3	17	15	12	7	5	3	7	11	0	16	1	18	13	3	11
MYO6	Q9UM54	Unconventional myosin-VI OS=Homo sapiens GN=MYO6 PE=1 SV=4	Unconventional myosin-VI	4	4	4	1	4	4	4	3	0	4	4	4	0	2	0	4	4	0	1	0	2	4	1	0	0	0	0	0	0	0	0	2	0	0	0	0	0	0	0	0	1	0	1	0	0	0
MYOF	Q9NZM1	Myoferlin OS=Homo sapiens GN=MYOF PE=1 SV=1	Myoferlin	68;1;1	68;1;1	68;1;1	3	68	68	68	58	2	61	55	60	27	47	40	51	47	4	55	17	46	48	46	19	1	2	17	1	0	49	4	29	13	26	5	2	0	2	17	1	44	0	33	25	1	23
NAA10	P41227	N-alpha-acetyltransferase 10 OS=Homo sapiens GN=NAA10 PE=1 SV=1	N-alpha-acetyltransferase 10	4;1	4;1	4;1	2	4	4	4	0	0	3	4	4	0	2	1	4	3	0	2	0	0	0	0	0	0	0	0	0	0	0	0	2	0	1	0	0	0	0	0	0	0	0	0	0	0	0
NAA15	Q9BXJ9	N-alpha-acetyltransferase 15, NatA auxiliary subunit OS=Homo sapiens GN=NAA15 PE=1 SV=1	N-alpha-acetyltransferase 15, NatA auxiliary subunit	6;2	6;2	6;2	2	6	6	6	5	0	4	3	5	1	3	4	6	5	0	1	1	1	2	1	0	0	0	0	0	0	0	0	4	0	1	0	1	0	0	2	0	0	0	1	0	0	1
NACA	Q13765	Nascent polypeptide-associated complex subunit alpha OS=Homo sapiens GN=NACA PE=1 SV=1;Nascent polypeptide-associated complex subunit alpha, muscle-specific form OS=Homo sapiens GN=NACA PE=1 SV=1	Nascent polypeptide-associated complex subunit alpha;Nascent polypeptide-associated complex subunit alpha, muscle-specific form	2;2	2;2	2;2	2	2	2	2	2	0	2	2	2	1	2	2	2	2	2	2	2	2	2	2	1	0	0	0	0	1	1	1	2	1	2	1	0	0	1	1	0	2	0	2	1	0	1
NAE1	Q13564	NEDD8-activating enzyme E1 regulatory subunit OS=Homo sapiens GN=NAE1 PE=1 SV=1	NEDD8-activating enzyme E1 regulatory subunit	3	3	3	1	3	3	3	3	0	3	3	3	0	2	2	2	3	0	1	0	2	2	0	0	0	0	0	0	0	0	0	1	0	0	0	0	0	0	0	0	0	0	0	0	0	0
NAGA	P17050	Alpha-N-acetylgalactosaminidase OS=Homo sapiens GN=NAGA PE=1 SV=2	Alpha-N-acetylgalactosaminidase	2	2	2	1	2	2	2	1	0	1	1	1	0	1	0	0	0	1	1	1	1	1	1	0	0	0	1	0	0	1	0	0	0	0	0	0	0	0	0	0	1	1	0	0	0	0
NAGK	Q9UJ70	N-acetyl-D-glucosamine kinase OS=Homo sapiens GN=NAGK PE=1 SV=4	N-acetyl-D-glucosamine kinase	6	6	6	1	6	6	6	3	0	5	5	5	0	5	2	6	4	1	3	1	5	5	2	2	0	0	0	1	0	4	2	1	1	1	1	1	0	0	1	0	3	0	1	1	0	1
NAMPT	P43490	Nicotinamide phosphoribosyltransferase OS=Homo sapiens GN=NAMPT PE=1 SV=1	Nicotinamide phosphoribosyltransferase	7	7	7	1	7	7	7	6	0	7	7	7	0	5	6	7	6	3	5	5	5	5	5	4	0	0	0	1	0	3	3	2	1	0	0	0	0	0	0	0	3	0	0	0	0	1
NANS	Q9NR45	Sialic acid synthase OS=Homo sapiens GN=NANS PE=1 SV=2	Sialic acid synthase	6	6	6	1	6	6	6	3	0	6	5	5	1	5	5	6	5	2	3	4	4	3	2	0	0	0	0	0	0	2	1	2	0	1	0	1	0	0	2	0	0	1	1	0	0	0
NAP1L1	P55209	Nucleosome assembly protein 1-like 1 OS=Homo sapiens GN=NAP1L1 PE=1 SV=1	Nucleosome assembly protein 1-like 1	6	4	4	1	6	4	4	5	0	6	6	6	3	6	5	6	6	2	5	5	3	4	3	2	0	0	1	0	0	3	2	2	1	1	1	1	1	2	2	1	3	0	3	3	0	3
NAP1L4	Q99733	Nucleosome assembly protein 1-like 4 OS=Homo sapiens GN=NAP1L4 PE=1 SV=1	Nucleosome assembly protein 1-like 4	8	8	6	1	8	8	6	5	0	6	6	7	2	6	6	7	8	2	5	4	4	4	3	1	0	0	0	0	0	2	0	2	1	1	1	0	1	1	3	0	2	0	4	3	0	2
NAPA	P54920	Alpha-soluble NSF attachment protein OS=Homo sapiens GN=NAPA PE=1 SV=3	Alpha-soluble NSF attachment protein	14;2	14;2	14;2	2	14	14	14	11	0	14	12	13	4	12	11	13	12	2	14	4	9	8	7	5	0	0	1	0	0	10	0	5	5	6	0	2	1	2	4	1	8	1	9	9	0	6
NAPG	Q99747	Gamma-soluble NSF attachment protein OS=Homo sapiens GN=NAPG PE=1 SV=1	Gamma-soluble NSF attachment protein	6	6	6	1	6	6	6	3	1	5	5	3	1	3	4	4	4	0	2	0	3	2	2	0	0	0	0	0	0	3	0	0	1	1	0	0	0	0	0	0	1	0	3	2	0	2
NARS	O43776	Asparagine--tRNA ligase, cytoplasmic OS=Homo sapiens GN=NARS PE=1 SV=1	Asparagine--tRNA ligase, cytoplasmic	8	8	8	1	8	8	8	6	0	6	6	5	0	5	7	8	7	0	5	1	4	3	4	0	0	0	0	0	0	2	0	0	0	0	0	0	1	1	4	0	0	0	6	5	0	2
NASP	P49321	Nuclear autoantigenic sperm protein OS=Homo sapiens GN=NASP PE=1 SV=2	Nuclear autoantigenic sperm protein	6	6	6	1	6	6	6	1	0	6	5	5	3	4	4	6	4	0	1	0	0	1	0	0	0	0	0	0	1	0	0	3	1	3	1	0	0	1	4	1	0	0	1	1	0	2
NAT10	Q9H0A0	N-acetyltransferase 10 OS=Homo sapiens GN=NAT10 PE=1 SV=2	N-acetyltransferase 10	4	4	4	1	4	4	4	0	0	0	0	0	0	0	3	4	4	0	1	1	0	0	0	0	0	0	0	0	0	1	1	0	0	0	0	1	0	0	1	0	1	0	0	0	0	0
NCAM1	P13591	Neural cell adhesion molecule 1 OS=Homo sapiens GN=NCAM1 PE=1 SV=3	Neural cell adhesion molecule 1	2	2	2	1	2	2	2	0	0	1	2	1	0	0	1	0	0	0	0	0	0	0	0	0	0	0	0	0	0	0	0	0	0	0	0	0	0	0	1	0	0	0	0	0	0	0
NCCRP1	Q6ZVX7	F-box only protein 50 OS=Homo sapiens GN=NCCRP1 PE=1 SV=1	F-box only protein 50	4	4	4	1	4	4	4	2	2	1	1	1	1	2	2	2	2	1	2	2	2	2	2	2	1	2	1	1	1	2	2	1	0	2	2	1	1	0	2	1	2	1	3	3	0	3
NCEH1	Q6PIU2	Neutral cholesterol ester hydrolase 1 OS=Homo sapiens GN=NCEH1 PE=1 SV=3	Neutral cholesterol ester hydrolase 1	4	4	4	1	4	4	4	3	0	4	4	4	2	4	4	4	4	0	3	3	4	4	4	1	0	0	2	0	0	3	1	0	0	0	0	0	0	0	1	0	2	0	1	1	0	2
NCKAP1	Q9Y2A7	Nck-associated protein 1 OS=Homo sapiens GN=NCKAP1 PE=1 SV=1	Nck-associated protein 1	9	9	9	1	9	9	9	6	0	5	4	4	2	3	2	5	3	0	6	1	7	6	6	1	0	0	3	0	0	5	0	2	2	2	0	0	0	0	4	0	2	0	6	4	0	3
NCL	P19338	Nucleolin OS=Homo sapiens GN=NCL PE=1 SV=3	Nucleolin	15	15	15	1	15	15	15	8	1	14	14	14	6	14	12	15	14	2	5	7	2	2	3	0	0	2	0	0	3	2	1	7	1	5	2	0	0	1	6	1	4	0	3	1	1	3
NCLN	Q969V3	Nicalin OS=Homo sapiens GN=NCLN PE=1 SV=2	Nicalin	5	5	5	1	5	5	5	2	0	3	5	4	1	4	4	5	5	0	1	2	0	1	1	0	0	0	0	0	0	0	0	1	0	0	0	0	0	0	0	0	0	0	0	0	0	0
NCS1	P62166	Neuronal calcium sensor 1 OS=Homo sapiens GN=NCS1 PE=1 SV=2	Neuronal calcium sensor 1	2	2	2	1	2	2	2	1	0	0	0	0	0	0	0	0	0	0	1	0	1	1	0	0	0	0	0	0	0	0	0	1	0	1	0	0	0	0	0	0	1	0	2	1	0	1
NCSTN	Q92542	Nicastrin OS=Homo sapiens GN=NCSTN PE=1 SV=2	Nicastrin	6	6	6	1	6	6	6	6	0	4	5	5	2	4	4	4	4	2	6	2	5	5	5	4	0	0	2	0	0	4	2	4	1	2	1	1	1	1	3	0	4	1	4	3	0	2
NDRG1	Q92597	Protein NDRG1 OS=Homo sapiens GN=NDRG1 PE=1 SV=1	Protein NDRG1	5	5	5	1	5	5	5	2	0	5	4	4	3	5	3	4	4	1	2	1	1	0	0	0	0	0	0	0	0	1	0	3	1	3	0	1	0	0	0	0	1	0	2	1	0	1
NDRG2	Q9UN36	Protein NDRG2 OS=Homo sapiens GN=NDRG2 PE=1 SV=2	Protein NDRG2	3	3	3	1	3	3	3	1	0	3	2	3	1	3	3	2	2	0	0	1	1	1	0	0	0	0	0	0	0	1	0	1	0	0	0	0	0	1	0	0	0	1	1	0	0	1
NDRG3	Q9UGV2	Protein NDRG3 OS=Homo sapiens GN=NDRG3 PE=1 SV=2	Protein NDRG3	7	7	7	1	7	7	7	4	0	6	6	5	1	5	4	5	4	1	4	2	2	2	1	1	0	0	0	0	0	1	0	2	1	2	1	0	0	1	1	0	1	0	1	1	0	1
NDUFS1	P28331	NADH-ubiquinone oxidoreductase 75 kDa subunit, mitochondrial OS=Homo sapiens GN=NDUFS1 PE=1 SV=3	NADH-ubiquinone oxidoreductase 75 kDa subunit, mitochondrial	2	2	2	1	2	2	2	2	0	1	1	1	0	2	1	2	2	1	1	1	1	2	2	1	0	0	0	1	0	1	1	0	0	1	0	0	0	0	1	0	1	0	1	1	0	1
NDUFS3	O75489	NADH dehydrogenase [ubiquinone] iron-sulfur protein 3, mitochondrial OS=Homo sapiens GN=NDUFS3 PE=1 SV=1	NADH dehydrogenase [ubiquinone] iron-sulfur protein 3, mitochondrial	2	2	2	1	2	2	2	1	0	0	1	0	0	2	2	2	2	1	1	1	1	2	1	0	0	0	0	0	1	1	1	0	0	0	1	0	0	0	2	0	0	0	1	0	0	1
NEDD4	P46934	E3 ubiquitin-protein ligase NEDD4 OS=Homo sapiens GN=NEDD4 PE=1 SV=4	E3 ubiquitin-protein ligase NEDD4	2	2	2	1	2	2	2	2	0	2	2	2	0	0	1	1	1	0	2	0	2	2	1	0	0	0	0	0	0	2	0	0	0	0	0	0	0	0	0	0	1	0	0	0	0	0
NEDD4L	Q96PU5	E3 ubiquitin-protein ligase NEDD4-like OS=Homo sapiens GN=NEDD4L PE=1 SV=2	E3 ubiquitin-protein ligase NEDD4-like	2	2	2	1	2	2	2	2	0	1	1	1	0	1	0	0	0	0	2	0	2	2	2	0	0	0	0	0	0	2	0	0	0	0	0	0	0	0	0	0	1	0	0	0	0	0
NEO1	Q92859	Neogenin OS=Homo sapiens GN=NEO1 PE=1 SV=2	Neogenin	2	2	2	1	2	2	2	2	0	0	1	1	0	0	0	1	0	0	1	0	2	2	1	0	0	0	0	0	0	1	0	0	0	0	0	0	0	0	0	0	1	0	0	1	0	0
NES	P48681	Nestin OS=Homo sapiens GN=NES PE=1 SV=2	Nestin	6	6	6	1	6	6	6	0	0	3	4	3	1	2	3	6	6	0	0	0	0	0	0	0	0	0	3	0	0	0	0	0	0	0	0	0	0	0	2	0	0	0	0	0	0	1
NEU1	Q99519	Sialidase-1 OS=Homo sapiens GN=NEU1 PE=1 SV=1	Sialidase-1	4	4	4	1	4	4	4	0	0	3	3	3	2	3	3	4	4	2	1	1	2	2	1	0	0	0	1	0	0	0	0	1	0	2	0	0	0	0	1	0	1	0	1	0	0	0
NEU2	Q9Y3R4	Sialidase-2 OS=Homo sapiens GN=NEU2 PE=1 SV=2	Sialidase-2	2	2	2	1	2	2	2	0	1	0	0	0	1	1	1	0	1	2	0	2	1	1	1	2	0	0	1	0	0	0	2	1	0	0	0	0	0	0	1	0	1	0	1	0	0	1
NHP2L1	P55769	NHP2-like protein 1 OS=Homo sapiens GN=NHP2L1 PE=1 SV=3	NHP2-like protein 1;NHP2-like protein 1, N-terminally processed	2	2	2	1	2	2	2	0	0	1	0	1	1	1	1	2	2	0	0	1	0	0	0	0	0	0	0	0	0	0	0	1	0	0	0	0	0	0	2	0	0	0	0	0	0	0
NID1	P14543	Nidogen-1 OS=Homo sapiens GN=NID1 PE=1 SV=3	Nidogen-1	7	7	7	1	7	7	7	1	0	0	1	1	0	3	3	7	6	0	3	2	2	2	5	0	0	0	2	1	0	5	0	0	1	0	0	0	0	0	1	0	5	0	0	3	0	1
NID2	Q14112	Nidogen-2 OS=Homo sapiens GN=NID2 PE=1 SV=3	Nidogen-2	16	16	16	1	16	16	16	9	0	1	2	4	0	4	6	7	7	0	12	1	6	8	8	7	0	0	8	3	0	11	1	0	0	0	0	0	0	0	2	0	6	0	4	10	1	9
NIFK	Q9BYG3	MKI67 FHA domain-interacting nucleolar phosphoprotein OS=Homo sapiens GN=NIFK PE=1 SV=1	MKI67 FHA domain-interacting nucleolar phosphoprotein	3	3	3	1	3	3	3	0	0	0	0	0	0	0	0	3	3	0	0	0	0	0	0	0	0	0	0	0	0	0	0	0	0	0	0	0	0	0	2	0	0	0	0	0	0	0
NIT2	Q9NQR4	Omega-amidase NIT2 OS=Homo sapiens GN=NIT2 PE=1 SV=1	Omega-amidase NIT2	4	4	4	1	4	4	4	3	0	4	4	4	1	4	2	4	2	0	3	2	4	4	1	1	0	0	0	0	0	1	0	1	0	1	0	0	0	0	0	0	1	0	1	1	0	0
NLRP1	Q9C000	NACHT, LRR and PYD domains-containing protein 1 OS=Homo sapiens GN=NLRP1 PE=1 SV=1	NACHT, LRR and PYD domains-containing protein 1	2	2	2	1	2	2	2	0	0	0	0	0	0	0	0	0	0	0	0	0	0	0	0	0	0	0	2	1	0	0	0	0	0	0	0	0	0	0	0	0	0	0	0	0	0	0
NME1	P15531	Nucleoside diphosphate kinase A OS=Homo sapiens GN=NME1 PE=1 SV=1	Nucleoside diphosphate kinase A	8	4	4	1	8	4	4	6	1	8	7	8	6	7	7	6	6	1	7	5	6	6	5	5	0	0	0	0	0	7	0	4	3	2	1	0	0	1	2	0	7	0	4	4	0	3
NME2	P22392	Nucleoside diphosphate kinase B OS=Homo sapiens GN=NME2 PE=1 SV=1;Putative nucleoside diphosphate kinase OS=Homo sapiens GN=NME2P1 PE=5 SV=1	Nucleoside diphosphate kinase B;Putative nucleoside diphosphate kinase	10;6	10;6	6;4	2	10	10	6	10	2	10	10	10	6	10	8	8	10	2	10	7	9	9	7	5	1	1	2	1	0	9	1	4	3	2	2	0	0	1	4	1	8	0	6	6	0	5
NOL9	Q5SY16	Polynucleotide 5-hydroxyl-kinase NOL9 OS=Homo sapiens GN=NOL9 PE=1 SV=1	Polynucleotide 5-hydroxyl-kinase NOL9	2	2	2	1	2	2	2	0	0	0	0	0	0	0	0	2	2	0	0	0	0	0	0	0	0	0	0	0	0	0	0	0	0	0	0	0	0	0	0	0	0	0	0	0	0	0
NOMO1	Q15155	Nodal modulator 1 OS=Homo sapiens GN=NOMO1 PE=1 SV=5;Nodal modulator 3 OS=Homo sapiens GN=NOMO3 PE=2 SV=2;Nodal modulator 2 OS=Homo sapiens GN=NOMO2 PE=1 SV=1	Nodal modulator 1;Nodal modulator 3;Nodal modulator 2	14;14;14	14;14;14	14;14;14	3	14	14	14	3	0	11	7	11	0	12	8	14	13	3	4	6	6	4	4	1	0	0	0	0	0	2	0	1	0	1	0	0	1	1	1	0	1	0	2	0	0	0
NONO	Q15233	Non-POU domain-containing octamer-binding protein OS=Homo sapiens GN=NONO PE=1 SV=4	Non-POU domain-containing octamer-binding protein	8	8	7	1	8	8	7	2	0	5	6	5	2	3	4	8	6	1	1	5	0	1	1	0	0	0	1	1	0	0	2	4	0	1	0	0	0	0	3	0	1	0	2	2	0	1
NOP2	P46087	Probable 28S rRNA (cytosine(4447)-C(5))-methyltransferase OS=Homo sapiens GN=NOP2 PE=1 SV=2	Probable 28S rRNA (cytosine(4447)-C(5))-methyltransferase	5	5	5	1	5	5	5	0	0	1	2	3	0	4	4	5	5	1	0	2	0	0	0	0	0	0	0	0	0	0	0	1	0	0	0	0	0	0	2	0	0	0	0	0	0	0
NOP56	O00567	Nucleolar protein 56 OS=Homo sapiens GN=NOP56 PE=1 SV=4	Nucleolar protein 56	7	7	7	1	7	7	7	1	0	2	0	1	0	2	2	7	6	0	0	0	0	0	0	0	0	0	0	0	0	0	0	0	0	0	0	0	0	0	1	0	1	0	0	0	0	0
NOP58	Q9Y2X3	Nucleolar protein 58 OS=Homo sapiens GN=NOP58 PE=1 SV=1	Nucleolar protein 58	6	6	6	1	6	6	6	0	0	0	0	0	0	2	2	6	6	0	0	0	0	0	0	0	0	0	0	0	0	0	0	0	0	0	0	0	0	0	1	0	0	0	0	0	0	0
NOTCH2	Q04721	Neurogenic locus notch homolog protein 2 OS=Homo sapiens GN=NOTCH2 PE=1 SV=3	Neurogenic locus notch homolog protein 2;Notch 2 extracellular truncation;Notch 2 intracellular domain	5	5	5	1	5	5	5	3	0	2	3	3	1	1	1	2	1	0	3	1	2	3	2	2	0	1	2	0	0	3	0	0	0	0	0	0	0	0	0	0	2	0	1	2	0	2
NPC1	O15118	Niemann-Pick C1 protein OS=Homo sapiens GN=NPC1 PE=1 SV=2	Niemann-Pick C1 protein	4	4	4	1	4	4	4	3	0	3	3	3	2	3	2	1	2	0	2	2	2	3	3	1	0	0	0	0	0	3	0	2	1	1	0	1	0	0	1	0	2	0	1	0	0	1
NPC2	P61916	Epididymal secretory protein E1 OS=Homo sapiens GN=NPC2 PE=1 SV=1	Epididymal secretory protein E1	6	6	6	1	6	6	6	5	1	6	6	6	5	6	5	4	4	0	3	2	2	4	2	2	0	1	1	0	0	2	1	3	2	3	0	1	1	0	1	0	2	0	3	0	0	0
NPEPPS	P55786	Puromycin-sensitive aminopeptidase OS=Homo sapiens GN=NPEPPS PE=1 SV=2;Puromycin-sensitive aminopeptidase-like protein OS=Homo sapiens GN=NPEPPSL1 PE=2 SV=3	Puromycin-sensitive aminopeptidase;Puromycin-sensitive aminopeptidase-like protein	22;11	22;11	22;11	2	22	22	22	15	2	20	18	19	9	14	12	13	13	8	15	11	15	13	10	9	1	1	6	3	0	12	6	9	6	5	1	2	1	2	10	0	10	0	13	12	0	12
NPLOC4	Q8TAT6	Nuclear protein localization protein 4 homolog OS=Homo sapiens GN=NPLOC4 PE=1 SV=3	Nuclear protein localization protein 4 homolog	2	2	2	1	2	2	2	2	0	2	2	2	0	2	1	2	2	0	1	0	1	1	1	0	0	0	0	0	0	0	0	1	0	0	0	0	0	0	0	0	0	0	0	0	0	0
NPM1	P06748	Nucleophosmin OS=Homo sapiens GN=NPM1 PE=1 SV=2	Nucleophosmin	6	6	6	1	6	6	6	2	2	4	5	4	3	5	5	6	6	3	3	4	2	3	2	2	1	2	1	1	1	4	2	4	1	3	1	0	1	2	5	1	3	1	3	2	1	4
NPTN	Q9Y639	Neuroplastin OS=Homo sapiens GN=NPTN PE=1 SV=2	Neuroplastin	6	6	6	1	6	6	6	6	1	6	5	5	3	4	5	5	5	1	6	3	5	6	5	5	0	0	4	2	0	5	1	4	1	3	0	0	0	0	2	0	5	0	5	5	1	2
NQO1	P15559	NAD(P)H dehydrogenase [quinone] 1 OS=Homo sapiens GN=NQO1 PE=1 SV=1	NAD(P)H dehydrogenase [quinone] 1	6	6	6	1	6	6	6	5	0	5	4	5	1	4	3	6	5	1	5	2	2	5	4	0	0	0	1	0	0	4	0	3	0	1	0	0	0	0	1	0	2	0	3	3	0	1
NRAS	P01111	GTPase NRas OS=Homo sapiens GN=NRAS PE=1 SV=1	GTPase NRas	7	7	2	1	7	7	2	7	0	6	6	6	3	5	3	5	4	0	7	3	6	6	6	5	1	2	1	0	0	6	2	3	3	2	1	0	0	1	1	0	6	0	5	4	0	2
NRCAM	Q92823	Neuronal cell adhesion molecule OS=Homo sapiens GN=NRCAM PE=1 SV=3	Neuronal cell adhesion molecule	2	2	2	1	2	2	2	0	0	0	0	0	0	0	0	1	0	0	0	0	0	0	0	0	0	0	0	1	0	0	0	0	0	0	0	0	0	0	0	0	0	0	0	0	0	0
NRP1	O14786	Neuropilin-1 OS=Homo sapiens GN=NRP1 PE=1 SV=3	Neuropilin-1	14	14	14	1	14	14	14	13	0	12	13	13	1	10	6	10	8	0	13	4	12	11	12	5	0	0	5	3	0	10	1	3	1	2	0	0	0	0	2	1	9	0	11	9	0	8
NSA2	O95478	Ribosome biogenesis protein NSA2 homolog OS=Homo sapiens GN=NSA2 PE=1 SV=1	Ribosome biogenesis protein NSA2 homolog	2	2	2	1	2	2	2	0	0	0	0	0	0	0	0	2	2	0	0	0	0	0	0	0	0	0	0	0	0	0	0	0	0	0	0	0	0	0	0	0	0	0	0	0	0	0
NSDHL	Q15738	Sterol-4-alpha-carboxylate 3-dehydrogenase, decarboxylating OS=Homo sapiens GN=NSDHL PE=1 SV=2	Sterol-4-alpha-carboxylate 3-dehydrogenase, decarboxylating	6	6	6	1	6	6	6	4	0	5	6	6	3	6	5	6	6	0	3	3	3	3	3	0	0	0	0	0	0	3	0	2	0	1	0	0	0	0	1	0	1	0	1	1	0	0
NSF	P46459	Vesicle-fusing ATPase OS=Homo sapiens GN=NSF PE=1 SV=3	Vesicle-fusing ATPase	8	8	8	1	8	8	8	5	0	5	6	3	0	2	4	7	3	2	3	3	4	4	2	0	0	0	1	0	0	2	0	0	0	0	0	0	0	0	3	0	0	0	4	3	0	3
NSFL1C	Q9UNZ2	NSFL1 cofactor p47 OS=Homo sapiens GN=NSFL1C PE=1 SV=2	NSFL1 cofactor p47	5	5	5	1	5	5	5	4	0	5	5	4	1	3	4	3	4	0	4	1	2	3	2	0	0	0	0	0	0	3	0	2	0	2	0	0	0	0	0	0	1	0	1	1	0	0
NT5E	P21589	5-nucleotidase OS=Homo sapiens GN=NT5E PE=1 SV=1	5-nucleotidase	33	33	33	1	33	33	33	27	7	27	28	26	15	25	19	25	24	8	29	19	26	26	26	18	4	8	14	5	2	27	9	18	12	15	9	6	5	9	13	1	26	0	29	30	7	24
NTMT1	Q9BV86	N-terminal Xaa-Pro-Lys N-methyltransferase 1 OS=Homo sapiens GN=NTMT1 PE=1 SV=3	N-terminal Xaa-Pro-Lys N-methyltransferase 1;N-terminal Xaa-Pro-Lys N-methyltransferase 1, N-terminally processed	3	3	3	1	3	3	3	2	0	1	2	2	1	2	1	2	2	1	2	0	1	1	1	0	0	0	1	0	0	0	0	2	0	1	0	0	0	0	0	0	0	0	2	1	0	0
NUBP2	Q9Y5Y2	Cytosolic Fe-S cluster assembly factor NUBP2 OS=Homo sapiens GN=NUBP2 PE=1 SV=1	Cytosolic Fe-S cluster assembly factor NUBP2	2	2	2	1	2	2	2	1	0	1	1	1	0	1	1	2	0	0	0	0	0	0	0	0	0	0	1	0	0	0	0	0	0	0	0	0	0	0	0	0	0	0	0	0	0	0
NUCB1	Q02818	Nucleobindin-1 OS=Homo sapiens GN=NUCB1 PE=1 SV=4	Nucleobindin-1	6	6	6	1	6	6	6	4	1	3	4	3	2	4	2	3	3	1	3	2	4	4	5	2	0	0	1	2	0	4	3	1	0	1	0	0	0	1	0	0	3	0	2	1	0	1
NUCB2	P80303	Nucleobindin-2 OS=Homo sapiens GN=NUCB2 PE=1 SV=2	Nucleobindin-2;Nesfatin-1	6	6	6	1	6	6	6	3	0	6	6	5	2	6	5	6	6	0	2	3	2	2	2	0	0	0	0	0	0	2	0	2	0	2	0	0	0	0	2	0	3	0	1	2	0	0
NUDC	Q9Y266	Nuclear migration protein nudC OS=Homo sapiens GN=NUDC PE=1 SV=1	Nuclear migration protein nudC	7	7	7	1	7	7	7	6	0	7	6	5	2	6	3	5	6	0	5	3	5	3	4	1	1	0	0	0	1	2	0	2	2	1	2	1	0	1	2	0	0	1	2	3	0	1
NUDCD1	Q96RS6	NudC domain-containing protein 1 OS=Homo sapiens GN=NUDCD1 PE=1 SV=2	NudC domain-containing protein 1	2	2	2	1	2	2	2	0	0	2	1	1	0	0	1	2	2	0	0	0	0	0	0	0	0	0	0	0	0	0	0	0	0	0	0	0	0	0	0	0	0	0	0	0	0	0
NUDCD2	Q8WVJ2	NudC domain-containing protein 2 OS=Homo sapiens GN=NUDCD2 PE=1 SV=1	NudC domain-containing protein 2	2	2	2	1	2	2	2	2	0	2	2	2	0	2	1	2	1	0	1	1	1	1	0	0	0	0	0	0	0	0	0	0	0	0	0	0	0	0	0	0	0	0	0	0	0	0
NUDT5	Q9UKK9	ADP-sugar pyrophosphatase OS=Homo sapiens GN=NUDT5 PE=1 SV=1	ADP-sugar pyrophosphatase	5	5	5	1	5	5	5	4	0	4	4	3	1	3	3	4	3	3	4	3	3	3	3	2	2	2	3	0	0	3	3	2	1	0	1	1	1	1	1	1	3	0	4	4	1	4
NUP43	Q8NFH3	Nucleoporin Nup43 OS=Homo sapiens GN=NUP43 PE=1 SV=1	Nucleoporin Nup43	2	2	2	1	2	2	2	2	0	2	2	1	0	1	1	2	2	0	0	0	1	1	1	0	0	0	0	0	0	0	0	0	0	0	0	0	0	1	0	0	0	0	0	0	0	0
NUP54	Q7Z3B4	Nucleoporin p54 OS=Homo sapiens GN=NUP54 PE=1 SV=2	Nucleoporin p54	2	2	2	1	2	2	2	1	0	1	1	1	0	1	1	2	2	0	0	0	1	1	0	0	0	0	0	0	0	0	0	0	0	0	0	0	0	0	1	0	0	0	0	0	0	0
NUP93	Q8N1F7	Nuclear pore complex protein Nup93 OS=Homo sapiens GN=NUP93 PE=1 SV=2	Nuclear pore complex protein Nup93	5	5	5	1	5	5	5	0	0	3	3	3	1	2	2	5	1	1	0	0	1	1	1	0	0	0	0	0	0	0	0	1	0	0	0	0	0	0	1	0	0	0	0	0	0	0
NUTF2	P61970	Nuclear transport factor 2 OS=Homo sapiens GN=NUTF2 PE=1 SV=1	Nuclear transport factor 2	3	3	3	1	3	3	3	2	1	3	2	2	2	3	2	3	3	2	2	2	2	2	2	2	0	0	1	1	0	2	1	2	0	1	0	0	0	0	2	0	3	0	1	1	0	1
OCC1	Q8TAD7	Overexpressed in colon carcinoma 1 protein OS=Homo sapiens GN=OCC1 PE=1 SV=2	Overexpressed in colon carcinoma 1 protein	3	3	3	1	3	3	3	3	1	3	3	3	1	3	2	3	3	0	3	0	2	2	1	2	0	0	0	0	0	3	0	3	1	3	0	0	0	0	0	0	3	0	2	2	1	1
OGT	O15294	UDP-N-acetylglucosamine--peptide N-acetylglucosaminyltransferase 110 kDa subunit OS=Homo sapiens GN=OGT PE=1 SV=3	UDP-N-acetylglucosamine--peptide N-acetylglucosaminyltransferase 110 kDa subunit	5	5	5	1	5	5	5	3	0	3	3	3	0	3	4	5	5	0	1	1	0	1	0	0	0	0	0	0	0	0	0	1	0	0	0	0	0	0	0	0	0	0	0	0	0	0
OLA1	Q9NTK5	Obg-like ATPase 1 OS=Homo sapiens GN=OLA1 PE=1 SV=2	Obg-like ATPase 1	5	5	5	1	5	5	5	3	0	3	4	3	2	4	4	5	2	0	3	3	2	2	2	1	1	1	2	0	0	2	0	1	1	0	0	0	0	0	2	0	2	0	1	1	0	1
OPA1	O60313	Dynamin-like 120 kDa protein, mitochondrial OS=Homo sapiens GN=OPA1 PE=1 SV=3	Dynamin-like 120 kDa protein, mitochondrial;Dynamin-like 120 kDa protein, form S1	3	3	3	1	3	3	3	1	0	2	2	2	0	1	0	1	1	0	0	0	0	0	0	0	0	0	0	0	0	0	0	0	0	0	0	0	0	0	0	0	0	0	0	0	0	0
OPTN	Q96CV9	Optineurin OS=Homo sapiens GN=OPTN PE=1 SV=2	Optineurin	4	4	4	1	4	4	4	3	0	2	3	3	1	3	2	2	3	0	3	0	2	2	1	0	0	0	0	0	0	1	0	1	1	1	1	0	0	1	1	0	0	0	3	2	0	0
OSBP	P22059	Oxysterol-binding protein 1 OS=Homo sapiens GN=OSBP PE=1 SV=1	Oxysterol-binding protein 1	9	9	9	1	9	9	9	2	0	7	7	8	2	7	7	7	6	0	2	1	1	0	0	0	0	0	0	0	0	0	0	2	0	1	0	0	0	0	0	0	0	0	2	1	0	0
OSBPL8	Q9BZF1	Oxysterol-binding protein-related protein 8 OS=Homo sapiens GN=OSBPL8 PE=1 SV=3	Oxysterol-binding protein-related protein 8	2	2	2	1	2	2	2	1	0	2	2	2	0	2	2	1	1	1	1	0	1	1	0	0	0	0	0	0	0	0	0	0	0	0	0	0	0	0	0	0	0	0	0	0	0	0
OSBPL9	Q96SU4	Oxysterol-binding protein-related protein 9 OS=Homo sapiens GN=OSBPL9 PE=1 SV=2	Oxysterol-binding protein-related protein 9	2	2	2	1	2	2	2	1	0	1	1	1	0	0	0	1	0	0	0	0	1	1	1	0	0	0	0	0	0	0	0	1	0	1	0	0	0	0	0	0	0	0	0	0	0	0
OSTC	Q9NRP0	Oligosaccharyltransferase complex subunit OSTC OS=Homo sapiens GN=OSTC PE=1 SV=1	Oligosaccharyltransferase complex subunit OSTC	2	2	2	1	2	2	2	1	0	1	1	1	0	1	1	1	2	0	1	1	0	1	1	0	0	0	0	0	0	1	0	0	0	0	0	0	0	0	0	0	0	0	0	0	0	0
OSTF1	Q92882	Osteoclast-stimulating factor 1 OS=Homo sapiens GN=OSTF1 PE=1 SV=2	Osteoclast-stimulating factor 1	3	3	3	1	3	3	3	1	0	1	1	1	0	1	1	1	0	0	1	0	1	1	1	1	0	0	0	0	0	0	0	1	0	2	0	0	0	0	0	0	0	0	0	0	0	0
OTUB1	Q96FW1	Ubiquitin thioesterase OTUB1 OS=Homo sapiens GN=OTUB1 PE=1 SV=2	Ubiquitin thioesterase OTUB1	4	4	4	1	4	4	4	3	0	4	4	4	3	3	2	4	4	2	2	1	3	3	2	2	0	0	1	0	0	2	1	3	0	2	1	0	0	0	2	0	1	0	3	3	0	3
OXSR1	O95747	Serine/threonine-protein kinase OSR1 OS=Homo sapiens GN=OXSR1 PE=1 SV=1	Serine/threonine-protein kinase OSR1	2	2	2	1	2	2	2	1	0	2	2	2	0	1	1	2	2	0	1	1	2	2	1	0	0	0	0	0	0	1	0	0	0	0	0	0	0	0	1	0	1	0	0	0	0	0
P4HA2	O15460	Prolyl 4-hydroxylase subunit alpha-2 OS=Homo sapiens GN=P4HA2 PE=1 SV=1	Prolyl 4-hydroxylase subunit alpha-2	4	4	4	1	4	4	4	2	1	1	2	3	0	3	2	4	2	0	1	0	1	1	0	0	0	0	3	0	0	1	0	0	0	1	0	0	0	0	1	0	0	0	1	0	0	0
P4HB	P07237	Protein disulfide-isomerase OS=Homo sapiens GN=P4HB PE=1 SV=3	Protein disulfide-isomerase	29	29	29	1	29	29	29	22	5	25	24	24	18	24	23	26	23	13	23	19	19	20	17	11	2	2	9	5	0	20	5	16	6	13	9	4	4	10	9	2	18	1	16	15	2	11
PA2G4	Q9UQ80	Proliferation-associated protein 2G4 OS=Homo sapiens GN=PA2G4 PE=1 SV=3	Proliferation-associated protein 2G4	7	7	7	1	7	7	7	4	1	4	5	5	0	3	4	7	5	0	3	3	2	2	2	0	0	0	0	0	0	2	1	1	0	2	1	0	0	0	1	0	0	0	1	1	0	0
PABPC1	P11940	Polyadenylate-binding protein 1 OS=Homo sapiens GN=PABPC1 PE=1 SV=2	Polyadenylate-binding protein 1	25;11;4;1	25;11;4;1	16;9;2;1	4	25	25	16	16	0	21	22	21	10	20	17	24	23	4	12	14	11	11	2	2	1	0	4	0	0	6	1	10	2	8	1	0	0	4	7	1	5	0	8	5	0	6
PABPC4	Q13310	Polyadenylate-binding protein 4 OS=Homo sapiens GN=PABPC4 PE=1 SV=1	Polyadenylate-binding protein 4	12	4	3	1	12	4	3	7	0	10	10	10	3	9	9	12	11	3	5	7	5	5	2	1	1	0	2	0	0	3	1	3	2	3	1	0	0	3	5	1	3	0	5	2	0	3
PACSIN2	Q9UNF0	Protein kinase C and casein kinase substrate in neurons protein 2 OS=Homo sapiens GN=PACSIN2 PE=1 SV=2	Protein kinase C and casein kinase substrate in neurons protein 2	8	8	8	1	8	8	8	6	0	6	5	5	5	4	3	2	2	0	5	2	7	7	3	1	0	0	0	0	0	4	1	5	1	4	1	0	0	0	3	0	3	0	7	5	0	3
PACSIN3	Q9UKS6	Protein kinase C and casein kinase substrate in neurons protein 3 OS=Homo sapiens GN=PACSIN3 PE=1 SV=2	Protein kinase C and casein kinase substrate in neurons protein 3	4	4	4	1	4	4	4	3	0	4	4	4	1	4	1	1	1	0	3	0	3	4	2	0	0	0	1	0	0	1	0	1	1	0	0	0	0	0	0	0	0	0	2	1	0	1
PAFAH1B1	P43034	Platelet-activating factor acetylhydrolase IB subunit alpha OS=Homo sapiens GN=PAFAH1B1 PE=1 SV=2	Platelet-activating factor acetylhydrolase IB subunit alpha	8	8	8	1	8	8	8	8	0	8	7	8	5	7	7	7	8	1	8	5	5	5	4	2	0	0	3	0	0	5	1	5	1	2	0	1	0	0	2	0	3	0	3	3	1	2
PAFAH1B3	Q15102	Platelet-activating factor acetylhydrolase IB subunit gamma OS=Homo sapiens GN=PAFAH1B3 PE=1 SV=1	Platelet-activating factor acetylhydrolase IB subunit gamma	2	2	2	1	2	2	2	1	0	1	1	1	0	1	1	1	1	0	1	1	1	2	1	0	0	0	0	0	0	0	0	0	0	0	0	0	0	0	0	0	0	0	1	1	0	0
PAG1	Q9NWQ8	Phosphoprotein associated with glycosphingolipid-enriched microdomains 1 OS=Homo sapiens GN=PAG1 PE=1 SV=2	Phosphoprotein associated with glycosphingolipid-enriched microdomains 1	2	2	2	1	2	2	2	2	0	0	0	1	0	0	0	0	0	0	2	0	1	1	1	0	0	0	0	0	0	1	0	0	0	0	0	0	0	0	0	0	0	0	1	0	0	0
PAICS	P22234	Multifunctional protein ADE2 OS=Homo sapiens GN=PAICS PE=1 SV=3	Multifunctional protein ADE2;Phosphoribosylaminoimidazole-succinocarboxamide synthase;Phosphoribosylaminoimidazole carboxylase	8	8	8	1	8	8	8	7	0	6	6	6	0	6	5	7	6	0	7	3	4	5	3	1	0	0	0	0	0	6	1	1	0	2	0	0	0	0	3	0	4	0	7	5	0	4
PAK2	Q13177	Serine/threonine-protein kinase PAK 2 OS=Homo sapiens GN=PAK2 PE=1 SV=3	Serine/threonine-protein kinase PAK 2;PAK-2p27;PAK-2p34	5;2;2	5;2;2	5;2;2	3	5	5	5	3	0	4	4	3	1	4	1	3	2	0	3	0	3	2	1	0	0	0	0	0	0	0	0	2	2	1	1	0	0	0	1	0	2	0	1	1	0	0
PAPPA	Q13219	Pappalysin-1 OS=Homo sapiens GN=PAPPA PE=1 SV=3	Pappalysin-1	3	3	3	1	3	3	3	0	0	0	0	0	1	0	0	0	0	0	0	0	0	0	0	0	0	0	1	0	0	0	0	0	0	0	0	0	0	0	0	0	0	0	0	0	0	0
PAPSS1	O43252	Bifunctional 3-phosphoadenosine 5-phosphosulfate synthase 1 OS=Homo sapiens GN=PAPSS1 PE=1 SV=2	Bifunctional 3-phosphoadenosine 5-phosphosulfate synthase 1;Sulfate adenylyltransferase;Adenylyl-sulfate kinase	3;1	3;1	3;1	2	3	3	3	0	0	1	0	0	1	1	1	3	1	0	0	0	0	1	1	0	0	0	0	0	0	0	0	0	0	0	0	0	0	0	1	0	0	0	0	0	0	0
PARK7	Q99497	Protein DJ-1 OS=Homo sapiens GN=PARK7 PE=1 SV=2	Protein deglycase DJ-1	8	8	8	1	8	8	8	6	4	7	7	7	6	7	5	4	5	3	6	4	6	5	5	5	1	1	2	2	3	4	4	7	6	5	1	0	2	2	4	2	4	0	3	5	2	4
PARP1	P09874	Poly [ADP-ribose] polymerase 1 OS=Homo sapiens GN=PARP1 PE=1 SV=4	Poly [ADP-ribose] polymerase 1	2	2	2	1	2	2	2	1	0	2	2	2	0	2	1	2	2	0	0	0	0	0	0	0	0	0	0	0	0	0	0	0	0	0	0	0	0	0	0	0	0	0	0	0	0	0
PARP4	Q9UKK3	Poly [ADP-ribose] polymerase 4 OS=Homo sapiens GN=PARP4 PE=1 SV=3	Poly [ADP-ribose] polymerase 4	11	11	11	1	11	11	11	6	1	1	2	5	1	3	1	8	8	1	5	3	6	6	2	0	0	1	2	3	0	3	0	1	0	0	1	1	0	0	5	0	0	0	2	1	0	0
PARVA	Q9NVD7	Alpha-parvin OS=Homo sapiens GN=PARVA PE=1 SV=1	Alpha-parvin	4	4	4	1	4	4	4	3	0	4	4	4	0	3	2	3	4	0	3	1	3	4	3	1	0	0	0	0	0	2	0	1	1	0	0	0	0	0	1	0	2	0	2	2	0	2
PBDC1	Q9BVG4	Protein PBDC1 OS=Homo sapiens GN=PBDC1 PE=1 SV=1	Protein PBDC1	2	2	2	1	2	2	2	1	0	1	1	1	0	1	1	0	0	0	1	0	0	1	0	0	0	0	0	0	0	0	0	0	0	0	0	0	0	0	1	0	0	0	1	1	0	0
PCBD1	P61457	Pterin-4-alpha-carbinolamine dehydratase OS=Homo sapiens GN=PCBD1 PE=1 SV=2	Pterin-4-alpha-carbinolamine dehydratase	2	2	2	1	2	2	2	2	0	2	2	2	1	2	2	1	1	0	2	1	1	2	1	1	0	0	0	0	0	1	0	0	0	0	0	0	0	0	0	0	1	0	0	0	0	0
PCBP1	Q15365	Poly(rC)-binding protein 1 OS=Homo sapiens GN=PCBP1 PE=1 SV=2	Poly(rC)-binding protein 1	9;1	9;1	6;0	2	9	9	6	8	1	7	9	8	5	7	6	8	6	1	7	2	7	8	4	1	1	1	4	3	0	4	0	7	3	4	2	1	1	4	2	1	3	1	2	2	0	0
PCBP2	Q15366	Poly(rC)-binding protein 2 OS=Homo sapiens GN=PCBP2 PE=1 SV=1;Poly(rC)-binding protein 3 OS=Homo sapiens GN=PCBP3 PE=2 SV=2	Poly(rC)-binding protein 2;Poly(rC)-binding protein 3	7;4	4;1	4;1	2	7	4	4	6	0	5	6	5	3	6	5	7	5	2	6	4	4	4	1	0	1	1	3	3	0	4	0	4	3	5	2	1	1	3	1	0	1	0	1	1	0	0
PCDH18	Q9HCL0	Protocadherin-18 OS=Homo sapiens GN=PCDH18 PE=2 SV=3	Protocadherin-18	2	2	2	1	2	2	2	2	0	0	0	0	0	0	0	0	0	0	2	0	2	2	2	1	0	0	0	0	0	1	0	0	0	0	0	0	0	0	0	0	2	0	0	0	0	0
PCDHGB2	Q9Y5G2	Protocadherin gamma-B2 OS=Homo sapiens GN=PCDHGB2 PE=2 SV=1	Protocadherin gamma-B2	3	3	1	1	3	3	1	1	0	1	1	1	0	1	0	1	0	0	2	0	1	1	1	1	0	0	1	0	0	1	0	1	0	1	0	0	0	0	0	0	2	0	1	1	0	1
PCMT1	P22061	Protein-L-isoaspartate(D-aspartate) O-methyltransferase OS=Homo sapiens GN=PCMT1 PE=1 SV=4	Protein-L-isoaspartate(D-aspartate) O-methyltransferase	8	8	8	1	8	8	8	5	1	6	5	5	4	6	5	4	5	0	5	2	4	4	3	0	1	0	0	0	0	2	1	4	2	2	1	0	0	1	2	0	2	1	1	1	0	1
PCNA	P12004	Proliferating cell nuclear antigen OS=Homo sapiens GN=PCNA PE=1 SV=1	Proliferating cell nuclear antigen	9	9	9	1	9	9	9	8	0	8	8	8	3	8	7	9	7	3	7	5	6	7	4	1	0	0	0	0	0	3	2	1	1	2	0	2	0	0	3	0	1	0	3	2	0	0
PCOLCE	Q15113	Procollagen C-endopeptidase enhancer 1 OS=Homo sapiens GN=PCOLCE PE=1 SV=2	Procollagen C-endopeptidase enhancer 1	6	6	6	1	6	6	6	5	0	0	0	0	0	0	0	0	0	0	6	0	4	5	3	0	0	0	0	0	0	5	0	0	0	0	0	0	1	1	0	0	5	0	3	5	0	1
PCYOX1	Q9UHG3	Prenylcysteine oxidase 1 OS=Homo sapiens GN=PCYOX1 PE=1 SV=3	Prenylcysteine oxidase 1	8	8	8	1	8	8	8	7	1	4	5	6	3	4	5	6	5	4	5	4	7	5	7	6	0	1	1	1	1	6	3	1	1	1	0	1	0	1	2	1	5	0	4	4	0	4
PCYT1A	P49585	Choline-phosphate cytidylyltransferase A OS=Homo sapiens GN=PCYT1A PE=1 SV=2;Choline-phosphate cytidylyltransferase B OS=Homo sapiens GN=PCYT1B PE=1 SV=1	Choline-phosphate cytidylyltransferase A;Choline-phosphate cytidylyltransferase B	2;2	2;2	2;2	2	2	2	2	1	0	2	2	2	1	2	0	1	2	0	0	0	0	0	0	0	0	0	0	0	0	0	0	1	0	1	0	0	0	0	1	0	0	0	0	0	0	0
PDCD10	Q9BUL8	Programmed cell death protein 10 OS=Homo sapiens GN=PDCD10 PE=1 SV=1	Programmed cell death protein 10	3	3	3	1	3	3	3	3	0	2	2	2	2	2	1	1	1	0	3	0	3	3	1	0	0	0	0	0	0	2	0	2	0	1	0	0	0	0	0	0	0	0	1	0	0	0
PDCD11	Q14690	Protein RRP5 homolog OS=Homo sapiens GN=PDCD11 PE=1 SV=3	Protein RRP5 homolog	2	2	2	1	2	2	2	0	0	0	0	0	0	0	0	2	2	0	0	0	0	0	0	0	0	0	0	0	0	0	0	0	0	0	0	0	0	0	0	0	0	0	0	0	0	0
PDCD1LG2	Q9BQ51	Programmed cell death 1 ligand 2 OS=Homo sapiens GN=PDCD1LG2 PE=1 SV=2	Programmed cell death 1 ligand 2	3	3	3	1	3	3	3	2	0	1	2	2	0	1	0	2	2	0	2	0	2	2	2	0	0	0	0	0	0	1	0	0	0	0	0	0	0	0	0	0	1	0	3	3	0	2
PDCD5	O14737	Programmed cell death protein 5 OS=Homo sapiens GN=PDCD5 PE=1 SV=3	Programmed cell death protein 5	6	6	6	1	6	6	6	6	0	6	6	6	3	6	4	6	6	0	4	1	4	6	2	0	0	0	0	0	0	1	0	3	1	2	2	2	0	1	0	0	0	0	2	3	1	3
PDCD6	O75340	Programmed cell death protein 6 OS=Homo sapiens GN=PDCD6 PE=1 SV=1	Programmed cell death protein 6	5	5	5	1	5	5	5	4	0	5	5	5	0	5	5	5	5	1	4	4	5	4	5	4	0	1	1	0	0	5	0	0	0	0	0	0	0	0	2	0	4	0	3	3	1	3
PDCD6IP	Q8WUM4	Programmed cell death 6-interacting protein OS=Homo sapiens GN=PDCD6IP PE=1 SV=1	Programmed cell death 6-interacting protein	45	45	45	1	45	45	45	39	2	39	41	41	20	34	28	35	31	3	39	15	31	37	40	23	0	1	32	17	0	37	5	18	7	15	4	1	1	8	17	0	38	0	22	26	3	23
PDGFD	Q9GZP0	Platelet-derived growth factor D OS=Homo sapiens GN=PDGFD PE=1 SV=1	Platelet-derived growth factor D;Platelet-derived growth factor D, latent form;Platelet-derived growth factor D, receptor-binding form	2	2	2	1	2	2	2	2	0	0	0	0	0	0	0	0	0	0	2	0	1	1	1	0	0	0	0	0	0	0	0	0	0	0	0	0	0	0	0	0	0	0	1	1	0	1
PDGFRA	P16234	Platelet-derived growth factor receptor alpha OS=Homo sapiens GN=PDGFRA PE=1 SV=1	Platelet-derived growth factor receptor alpha	9;1	9;1	9;1	2	9	9	9	7	0	1	1	5	0	3	1	2	1	0	9	2	8	9	8	1	1	0	3	0	0	8	0	1	1	0	1	0	1	0	0	0	6	0	1	4	0	3
PDGFRB	P09619	Platelet-derived growth factor receptor beta OS=Homo sapiens GN=PDGFRB PE=1 SV=1	Platelet-derived growth factor receptor beta	18	18	18	1	18	18	18	17	0	8	8	12	1	3	2	4	4	0	15	1	16	16	13	5	0	1	5	0	1	14	0	2	0	0	0	0	0	0	1	1	12	0	11	10	0	8
PDIA3	P30101	Protein disulfide-isomerase A3 OS=Homo sapiens GN=PDIA3 PE=1 SV=4	Protein disulfide-isomerase A3	26	26	26	1	26	26	26	19	5	22	23	22	19	22	22	23	23	9	18	14	14	15	14	9	3	2	8	4	0	15	6	17	9	13	7	4	4	8	12	1	13	2	16	13	1	9
PDIA4	P13667	Protein disulfide-isomerase A4 OS=Homo sapiens GN=PDIA4 PE=1 SV=2	Protein disulfide-isomerase A4	19	19	19	1	19	19	19	13	0	14	15	15	5	15	16	18	18	5	14	12	7	5	8	4	0	0	6	2	0	11	1	5	0	6	1	0	0	4	5	2	5	1	6	3	0	2
PDIA6	Q15084	Protein disulfide-isomerase A6 OS=Homo sapiens GN=PDIA6 PE=1 SV=1	Protein disulfide-isomerase A6	12	12	12	1	12	12	12	8	0	11	9	10	3	11	10	12	11	2	9	7	4	7	4	2	1	0	2	0	0	8	2	3	3	3	2	1	2	4	5	0	7	0	5	4	0	4
PDLIM1	O00151	PDZ and LIM domain protein 1 OS=Homo sapiens GN=PDLIM1 PE=1 SV=4	PDZ and LIM domain protein 1	4	4	4	1	4	4	4	4	0	4	4	4	1	4	4	4	2	0	3	2	4	4	3	0	0	0	0	0	0	3	0	0	1	1	1	0	0	1	2	0	1	0	2	2	0	1
PDLIM7	Q9NR12	PDZ and LIM domain protein 7 OS=Homo sapiens GN=PDLIM7 PE=1 SV=1	PDZ and LIM domain protein 7	3	3	3	1	3	3	3	1	0	2	1	1	0	1	1	2	1	0	1	1	2	2	1	0	0	0	1	0	0	1	0	1	0	0	0	1	0	0	0	0	0	0	0	0	0	0
PDXK	O00764	Pyridoxal kinase OS=Homo sapiens GN=PDXK PE=1 SV=1	Pyridoxal kinase	3	3	3	1	3	3	3	3	0	3	3	3	0	3	2	3	3	0	3	1	3	3	2	0	0	0	0	0	0	0	0	0	0	0	0	0	0	0	0	0	1	0	1	1	0	1
PEBP1	P30086	Phosphatidylethanolamine-binding protein 1 OS=Homo sapiens GN=PEBP1 PE=1 SV=3	Phosphatidylethanolamine-binding protein 1;Hippocampal cholinergic neurostimulating peptide	9	9	9	1	9	9	9	9	3	9	9	9	4	8	7	5	7	3	9	4	8	6	6	3	1	1	2	2	2	9	4	6	5	5	2	1	0	0	3	0	6	1	5	5	3	4
PEF1	Q9UBV8	Peflin OS=Homo sapiens GN=PEF1 PE=1 SV=1	Peflin	3	3	3	1	3	3	3	1	0	1	1	2	0	0	0	1	1	0	1	1	1	1	1	1	0	0	1	0	0	1	1	0	1	1	0	0	0	0	1	0	1	0	1	1	0	1
PELP1	Q8IZL8	Proline-, glutamic acid- and leucine-rich protein 1 OS=Homo sapiens GN=PELP1 PE=1 SV=2	Proline-, glutamic acid- and leucine-rich protein 1	4	4	4	1	4	4	4	0	0	0	0	0	0	0	0	4	2	0	0	0	0	0	0	0	0	0	0	0	0	0	0	0	0	1	0	0	0	0	0	1	0	0	0	0	0	0
PEPD	P12955	Xaa-Pro dipeptidase OS=Homo sapiens GN=PEPD PE=1 SV=3	Xaa-Pro dipeptidase	13	13	13	1	13	13	13	11	1	13	10	13	5	10	10	8	7	1	9	3	10	9	6	3	0	0	1	2	0	7	2	5	1	5	2	0	0	0	4	0	5	0	2	2	0	2
PFDN1	O60925	Prefoldin subunit 1 OS=Homo sapiens GN=PFDN1 PE=1 SV=2	Prefoldin subunit 1	4	4	4	1	4	4	4	2	0	2	2	2	2	1	1	1	1	1	2	3	1	0	0	0	0	0	0	0	0	2	0	2	0	0	0	1	0	0	1	0	2	0	4	2	0	0
PFDN2	Q9UHV9	Prefoldin subunit 2 OS=Homo sapiens GN=PFDN2 PE=1 SV=1	Prefoldin subunit 2	4	4	4	1	4	4	4	3	0	3	3	4	2	2	2	3	2	1	3	0	2	3	1	1	0	0	0	0	0	2	0	1	1	0	0	0	0	1	1	0	1	0	2	2	0	0
PFDN4	Q9NQP4	Prefoldin subunit 4 OS=Homo sapiens GN=PFDN4 PE=1 SV=1	Prefoldin subunit 4	3	3	3	1	3	3	3	3	0	3	3	3	1	3	3	2	3	1	2	2	3	2	1	0	0	0	0	0	0	1	0	2	0	2	0	0	0	0	0	0	2	0	0	0	0	0
PFDN5	Q99471	Prefoldin subunit 5 OS=Homo sapiens GN=PFDN5 PE=1 SV=2	Prefoldin subunit 5	5	5	5	1	5	5	5	3	0	4	4	4	1	4	3	5	4	1	4	3	4	3	3	0	0	0	0	1	0	2	0	2	2	3	2	1	1	2	1	0	1	0	2	1	0	1
PFDN6	O15212	Prefoldin subunit 6 OS=Homo sapiens GN=PFDN6 PE=1 SV=1	Prefoldin subunit 6	2	2	2	1	2	2	2	2	0	2	2	2	1	2	2	2	2	0	2	1	2	1	1	0	0	0	0	0	0	1	0	1	0	0	0	0	0	0	0	0	0	0	0	0	0	0
PFKL	P17858	ATP-dependent 6-phosphofructokinase, liver type OS=Homo sapiens GN=PFKL PE=1 SV=6	ATP-dependent 6-phosphofructokinase, liver type	8	4	4	1	8	4	4	2	0	3	3	4	0	5	4	6	4	0	3	0	3	4	2	1	0	0	4	1	0	2	0	1	0	2	1	0	0	2	5	0	1	0	2	1	0	1
PFKM	P08237	ATP-dependent 6-phosphofructokinase, muscle type OS=Homo sapiens GN=PFKM PE=1 SV=2	ATP-dependent 6-phosphofructokinase, muscle type	8	6	6	1	8	6	6	4	0	3	3	3	0	3	3	6	4	0	2	1	2	2	0	0	0	0	1	0	0	0	0	0	0	0	1	0	0	2	3	0	0	0	1	0	0	0
PFKP	Q01813	ATP-dependent 6-phosphofructokinase, platelet type OS=Homo sapiens GN=PFKP PE=1 SV=2	ATP-dependent 6-phosphofructokinase, platelet type	23	23	19	1	23	23	19	15	0	19	17	17	2	15	14	21	19	2	14	8	11	15	7	1	0	1	6	1	0	7	1	6	1	5	1	0	0	4	12	0	2	1	6	4	1	4
PFN1	P07737	Profilin-1 OS=Homo sapiens GN=PFN1 PE=1 SV=2	Profilin-1	12	12	8	1	12	12	8	12	6	12	12	11	10	11	10	11	9	5	12	9	11	12	11	10	3	3	8	5	2	12	4	11	10	10	8	4	4	6	10	3	11	1	10	10	2	7
PFN2	P35080	Profilin-2 OS=Homo sapiens GN=PFN2 PE=1 SV=3	Profilin-2	5	5	5	1	5	5	5	5	1	5	4	4	2	3	4	5	3	0	5	2	3	3	2	1	0	0	1	1	0	3	0	2	1	0	0	0	1	0	3	0	2	1	3	2	0	2
PGAM1	P18669	Phosphoglycerate mutase 1 OS=Homo sapiens GN=PGAM1 PE=1 SV=2	Phosphoglycerate mutase 1	12;4;3	12;4;3	12;4;3	3	12	12	12	12	1	12	11	10	5	10	9	10	9	4	12	8	7	8	4	5	0	1	3	1	1	9	2	7	3	3	4	3	1	1	3	1	7	0	9	6	1	7
PGD	P52209	6-phosphogluconate dehydrogenase, decarboxylating OS=Homo sapiens GN=PGD PE=1 SV=3	6-phosphogluconate dehydrogenase, decarboxylating	11	11	11	1	11	11	11	8	0	8	7	8	7	8	7	9	8	0	8	3	8	8	3	1	1	1	2	0	0	2	0	8	3	7	1	0	1	1	7	0	2	1	7	5	0	5
PGK1	P00558	Phosphoglycerate kinase 1 OS=Homo sapiens GN=PGK1 PE=1 SV=3	Phosphoglycerate kinase 1	20;5	20;5	20;5	2	20	20	20	18	1	19	19	19	12	17	15	16	14	7	18	10	17	14	13	7	0	1	9	3	0	12	5	13	9	9	6	3	3	5	9	1	10	0	15	15	1	11
PGLS	O95336	6-phosphogluconolactonase OS=Homo sapiens GN=PGLS PE=1 SV=2	6-phosphogluconolactonase	6	6	6	1	6	6	6	5	0	5	5	5	0	5	2	4	4	0	5	2	6	5	4	1	0	1	0	0	0	4	0	1	0	1	0	0	0	0	2	0	4	0	1	0	0	1
PGM1	P36871	Phosphoglucomutase-1 OS=Homo sapiens GN=PGM1 PE=1 SV=3	Phosphoglucomutase-1	5	5	5	1	5	5	5	3	0	4	3	3	2	1	2	3	3	0	4	0	3	3	1	1	0	0	4	1	0	1	0	2	0	1	0	0	0	0	2	0	0	0	1	1	0	1
PGM2	Q96G03	Phosphoglucomutase-2 OS=Homo sapiens GN=PGM2 PE=1 SV=4	Phosphoglucomutase-2	8	8	8	1	8	8	8	3	1	7	6	6	2	5	3	5	4	2	3	4	3	5	1	2	0	0	0	0	0	3	1	2	0	3	0	1	0	0	1	0	3	0	2	2	0	1
PGM3	O95394	Phosphoacetylglucosamine mutase OS=Homo sapiens GN=PGM3 PE=1 SV=1	Phosphoacetylglucosamine mutase	2	2	2	1	2	2	2	1	0	2	2	2	0	1	1	2	1	1	1	0	1	1	1	0	0	0	0	0	0	0	0	0	0	0	0	0	0	0	0	0	0	0	0	0	0	0
PGP	A6NDG6	Phosphoglycolate phosphatase OS=Homo sapiens GN=PGP PE=1 SV=1	Phosphoglycolate phosphatase	2	2	2	1	2	2	2	2	0	2	2	1	0	2	2	2	2	0	2	1	2	2	1	0	0	0	0	0	0	1	0	0	0	0	0	0	0	0	1	0	0	0	1	2	0	0
PGRMC1	O00264	Membrane-associated progesterone receptor component 1 OS=Homo sapiens GN=PGRMC1 PE=1 SV=3	Membrane-associated progesterone receptor component 1	5	5	5	1	5	5	5	1	0	3	1	3	1	3	2	3	3	0	1	1	2	3	2	1	0	0	0	0	0	1	0	1	1	1	1	0	0	0	1	0	1	0	2	0	0	0
PGRMC2	O15173	Membrane-associated progesterone receptor component 2 OS=Homo sapiens GN=PGRMC2 PE=1 SV=1	Membrane-associated progesterone receptor component 2	2	2	2	1	2	2	2	1	0	2	2	2	0	2	2	2	2	0	1	1	1	1	1	0	0	0	1	0	0	1	1	0	1	0	0	0	0	0	2	0	1	0	1	1	0	2
PHB	P35232	Prohibitin OS=Homo sapiens GN=PHB PE=1 SV=1	Prohibitin	9	9	9	1	9	9	9	5	0	5	4	4	1	6	8	7	8	1	5	5	6	5	6	3	0	0	2	0	0	7	5	2	0	0	0	0	0	0	2	0	5	0	4	4	0	4
PHB2	Q99623	Prohibitin-2 OS=Homo sapiens GN=PHB2 PE=1 SV=2	Prohibitin-2	6	6	6	1	6	6	6	4	0	1	2	3	2	4	3	5	5	0	4	3	1	2	2	2	0	1	1	0	0	6	0	1	0	0	0	1	0	0	0	0	3	0	1	1	0	1
PHGDH	O43175	D-3-phosphoglycerate dehydrogenase OS=Homo sapiens GN=PHGDH PE=1 SV=4	D-3-phosphoglycerate dehydrogenase	13	13	13	1	13	13	13	8	0	7	6	7	2	6	6	11	8	2	5	4	6	6	5	3	0	0	4	2	0	4	0	5	2	3	2	1	0	2	4	0	4	0	3	2	0	2
PHLDA1	Q8WV24	Pleckstrin homology-like domain family A member 1 OS=Homo sapiens GN=PHLDA1 PE=1 SV=4	Pleckstrin homology-like domain family A member 1	2	2	2	1	2	2	2	2	0	0	1	0	0	0	0	0	1	0	1	1	1	2	2	0	0	0	0	0	0	2	0	0	0	0	0	0	0	0	1	0	1	0	0	0	0	0
PHPT1	Q9NRX4	14 kDa phosphohistidine phosphatase OS=Homo sapiens GN=PHPT1 PE=1 SV=1	14 kDa phosphohistidine phosphatase	3	3	3	1	3	3	3	2	0	3	3	3	0	2	2	3	3	0	2	0	3	3	1	0	0	0	0	0	0	0	0	0	1	0	0	0	0	1	0	0	1	0	0	0	0	0
PI4K2A	Q9BTU6	Phosphatidylinositol 4-kinase type 2-alpha OS=Homo sapiens GN=PI4K2A PE=1 SV=1	Phosphatidylinositol 4-kinase type 2-alpha	6	6	6	1	6	6	6	4	0	6	6	6	1	5	4	5	4	0	3	0	4	5	3	0	0	0	0	0	0	1	0	2	0	2	0	0	0	0	0	0	0	0	0	0	0	0
PI4KA	P42356	Phosphatidylinositol 4-kinase alpha OS=Homo sapiens GN=PI4KA PE=1 SV=3	Phosphatidylinositol 4-kinase alpha	3	3	3	1	3	3	3	3	0	3	3	3	0	2	1	2	0	0	3	0	3	3	3	0	0	0	0	0	0	3	0	2	0	0	0	0	0	0	1	0	0	0	2	3	0	0
PICALM	Q13492	Phosphatidylinositol-binding clathrin assembly protein OS=Homo sapiens GN=PICALM PE=1 SV=2;Clathrin coat assembly protein AP180 OS=Homo sapiens GN=SNAP91 PE=1 SV=2	Phosphatidylinositol-binding clathrin assembly protein;Clathrin coat assembly protein AP180	2;1	2;1	2;1	2	2	2	2	1	0	2	2	2	0	1	1	1	2	0	1	1	2	1	1	0	0	0	0	0	0	1	0	0	0	0	0	0	0	0	0	0	0	0	0	0	0	0
PIGK	Q92643	GPI-anchor transamidase OS=Homo sapiens GN=PIGK PE=1 SV=2	GPI-anchor transamidase	2	2	2	1	2	2	2	1	0	1	2	2	0	2	2	2	2	0	1	1	2	2	1	0	0	0	0	0	0	1	0	1	0	0	0	0	0	0	0	0	0	0	0	0	0	0
PIGR	P01833	Polymeric immunoglobulin receptor OS=Homo sapiens GN=PIGR PE=1 SV=4	Polymeric immunoglobulin receptor;Secretory component	7	7	7	1	7	7	7	3	1	3	3	3	3	2	3	1	2	0	3	3	2	2	1	3	0	1	1	2	0	0	2	2	0	2	1	1	0	0	2	1	1	0	5	3	1	2
PIK3C2A	O00443	Phosphatidylinositol 4-phosphate 3-kinase C2 domain-containing subunit alpha OS=Homo sapiens GN=PIK3C2A PE=1 SV=2	Phosphatidylinositol 4-phosphate 3-kinase C2 domain-containing subunit alpha	2	2	2	1	2	2	2	0	0	1	0	1	0	2	0	2	1	0	0	0	0	0	0	0	0	0	0	0	0	0	0	0	0	0	0	0	0	0	0	0	0	0	0	0	0	0
PIN1	Q13526	Peptidyl-prolyl cis-trans isomerase NIMA-interacting 1 OS=Homo sapiens GN=PIN1 PE=1 SV=1	Peptidyl-prolyl cis-trans isomerase NIMA-interacting 1	4	4	4	1	4	4	4	4	1	4	3	4	0	4	3	4	3	0	3	0	3	1	2	0	0	0	0	0	0	2	0	0	1	0	0	0	1	0	0	0	1	0	1	1	0	0
PIP	P12273	Prolactin-inducible protein OS=Homo sapiens GN=PIP PE=1 SV=1	Prolactin-inducible protein	4	4	4	1	4	4	4	4	4	4	4	4	4	4	4	4	4	4	4	4	4	4	4	4	2	4	3	4	4	4	4	4	3	3	4	3	3	2	3	3	4	4	4	4	2	4
PIP4K2A	P48426	Phosphatidylinositol 5-phosphate 4-kinase type-2 alpha OS=Homo sapiens GN=PIP4K2A PE=1 SV=2;Phosphatidylinositol 5-phosphate 4-kinase type-2 beta OS=Homo sapiens GN=PIP4K2B PE=1 SV=1	Phosphatidylinositol 5-phosphate 4-kinase type-2 alpha;Phosphatidylinositol 5-phosphate 4-kinase type-2 beta	2;1	2;1	2;1	2	2	2	2	2	0	2	2	2	0	2	2	2	2	0	2	0	2	2	2	1	0	0	0	0	0	1	0	0	0	0	0	0	0	0	1	0	1	0	2	2	0	0
PITPNA	Q00169	Phosphatidylinositol transfer protein alpha isoform OS=Homo sapiens GN=PITPNA PE=1 SV=2	Phosphatidylinositol transfer protein alpha isoform	4	4	4	1	4	4	4	1	0	4	2	3	1	3	1	2	2	0	1	0	3	4	2	0	0	0	0	0	0	2	0	0	0	0	0	0	0	0	0	0	1	0	1	1	0	1
PITPNB	P48739	Phosphatidylinositol transfer protein beta isoform OS=Homo sapiens GN=PITPNB PE=1 SV=2	Phosphatidylinositol transfer protein beta isoform	6	6	6	1	6	6	6	5	0	5	5	6	2	4	2	4	2	0	5	0	5	4	5	1	0	1	0	0	0	3	0	2	0	1	0	0	0	0	1	0	1	0	4	4	0	3
PKM	P14618	Pyruvate kinase PKM OS=Homo sapiens GN=PKM PE=1 SV=4	Pyruvate kinase PKM	40;1	40;1	40;1	2	40	40	40	29	11	37	34	35	19	32	29	36	30	20	28	23	26	25	20	13	8	6	21	9	6	24	11	24	16	18	14	10	8	13	17	5	25	4	26	25	6	21
PKP1	Q13835	Plakophilin-1 OS=Homo sapiens GN=PKP1 PE=1 SV=2	Plakophilin-1	15	15	15	1	15	15	15	11	7	8	5	6	7	7	4	5	8	12	8	12	8	9	8	8	0	3	5	5	3	10	9	7	1	4	3	1	0	2	7	3	7	0	9	7	1	7
PLAA	Q9Y263	Phospholipase A-2-activating protein OS=Homo sapiens GN=PLAA PE=1 SV=2	Phospholipase A-2-activating protein	3	3	3	1	3	3	3	1	0	1	1	1	0	1	2	3	1	0	0	0	1	1	0	0	0	0	0	0	0	0	0	0	0	0	0	0	0	0	2	0	1	0	1	0	0	0
PLBD1	Q6P4A8	Phospholipase B-like 1 OS=Homo sapiens GN=PLBD1 PE=1 SV=2	Phospholipase B-like 1;Phospholipase B-like 1 chain A;Phospholipase B-like 1 chain B;Phospholipase B-like 1 chain C	3	3	3	1	3	3	3	1	0	2	2	2	0	1	2	1	2	1	1	1	2	2	1	1	0	0	0	0	0	2	0	0	0	0	0	0	0	0	0	0	2	0	1	0	0	0
PLBD2	Q8NHP8	Putative phospholipase B-like 2 OS=Homo sapiens GN=PLBD2 PE=1 SV=2	Putative phospholipase B-like 2;Putative phospholipase B-like 2 32 kDa form;Putative phospholipase B-like 2 45 kDa form	4	4	4	1	4	4	4	3	1	3	3	4	2	3	4	3	4	2	2	4	3	2	3	1	1	0	0	1	0	3	2	1	1	0	1	1	0	0	1	0	2	0	1	1	0	0
PLCB4	Q15147	1-phosphatidylinositol 4,5-bisphosphate phosphodiesterase beta-4 OS=Homo sapiens GN=PLCB4 PE=1 SV=3	1-phosphatidylinositol 4,5-bisphosphate phosphodiesterase beta-4	3	3	3	1	3	3	3	3	0	3	3	3	0	2	0	1	1	0	3	0	3	2	2	0	0	0	0	0	0	2	0	0	0	0	0	0	0	0	0	0	1	0	0	0	0	0
PLCD1	P51178	1-phosphatidylinositol 4,5-bisphosphate phosphodiesterase delta-1 OS=Homo sapiens GN=PLCD1 PE=1 SV=2	1-phosphatidylinositol 4,5-bisphosphate phosphodiesterase delta-1	9	9	9	1	9	9	9	8	0	7	7	7	2	6	4	4	4	0	8	2	6	6	5	0	0	0	0	0	0	4	0	2	0	1	0	0	0	0	2	0	0	0	3	4	0	0
PLCG1	P19174	1-phosphatidylinositol 4,5-bisphosphate phosphodiesterase gamma-1 OS=Homo sapiens GN=PLCG1 PE=1 SV=1	1-phosphatidylinositol 4,5-bisphosphate phosphodiesterase gamma-1	2	2	2	1	2	2	2	1	0	0	1	2	1	2	1	2	2	0	1	0	2	1	0	0	0	0	0	0	0	0	0	0	0	0	0	0	0	0	0	0	0	0	1	0	0	0
PLCXD3	Q63HM9	PI-PLC X domain-containing protein 3 OS=Homo sapiens GN=PLCXD3 PE=2 SV=2	PI-PLC X domain-containing protein 3	2	2	2	1	2	2	2	0	0	0	0	0	0	1	0	1	2	0	1	0	0	0	0	0	0	0	0	0	0	1	0	0	0	0	0	0	0	0	0	0	1	0	0	1	0	1
PLD3	Q8IV08	Phospholipase D3 OS=Homo sapiens GN=PLD3 PE=1 SV=1	Phospholipase D3	6	6	6	1	6	6	6	3	0	3	3	4	2	2	3	3	3	1	4	2	3	2	3	2	0	0	3	0	0	3	0	2	0	0	1	0	0	0	2	0	1	0	2	3	0	2
PLEC	Q15149	Plectin OS=Homo sapiens GN=PLEC PE=1 SV=3	Plectin	90	90	85	1	90	90	85	56	7	72	69	66	29	62	53	76	70	20	40	29	36	33	32	17	2	2	4	7	0	33	8	37	9	31	4	5	1	3	30	1	32	0	25	20	2	22
PLEKHO2	Q8TD55	Pleckstrin homology domain-containing family O member 2 OS=Homo sapiens GN=PLEKHO2 PE=2 SV=1	Pleckstrin homology domain-containing family O member 2	5	5	5	1	5	5	5	5	0	2	3	3	0	2	1	1	2	0	5	0	5	5	3	1	0	0	1	0	0	4	0	0	0	0	0	0	0	0	1	0	1	0	3	3	0	3
PLG	P00747	Plasminogen OS=Homo sapiens GN=PLG PE=1 SV=2	Plasminogen;Plasmin heavy chain A;Activation peptide;Angiostatin;Plasmin heavy chain A, short form;Plasmin light chain B	5	2	2	1	5	2	2	5	0	2	1	2	1	1	2	2	2	0	2	1	2	3	2	1	0	1	3	1	0	1	0	0	0	1	0	0	0	1	1	0	1	0	0	0	0	1
PLIN3	O60664	Perilipin-3 OS=Homo sapiens GN=PLIN3 PE=1 SV=3	Perilipin-3	8	8	8	1	8	8	8	8	0	7	7	6	2	8	5	4	8	0	8	1	8	7	6	0	0	0	0	0	0	5	0	1	0	1	0	0	0	0	2	0	1	0	7	6	0	4
PLOD1	Q02809	Procollagen-lysine,2-oxoglutarate 5-dioxygenase 1 OS=Homo sapiens GN=PLOD1 PE=1 SV=2	Procollagen-lysine,2-oxoglutarate 5-dioxygenase 1	10	10	10	1	10	10	10	5	0	6	5	8	1	6	6	9	7	0	8	3	5	3	1	1	0	0	5	2	0	6	0	0	0	0	1	0	0	0	3	0	4	0	1	1	0	2
PLOD3	O60568	Procollagen-lysine,2-oxoglutarate 5-dioxygenase 3 OS=Homo sapiens GN=PLOD3 PE=1 SV=1	Procollagen-lysine,2-oxoglutarate 5-dioxygenase 3	7	7	7	1	7	7	7	1	1	3	1	3	0	4	3	6	5	0	0	1	1	0	1	0	0	0	5	2	0	2	0	0	0	1	0	2	0	0	1	0	1	0	2	2	0	0
PLS3	P13797	Plastin-3 OS=Homo sapiens GN=PLS3 PE=1 SV=4	Plastin-3	9;1;1	9;1;1	9;1;1	3	9	9	9	7	0	8	7	7	0	5	5	5	4	2	7	2	8	5	6	3	1	1	1	0	0	7	2	3	2	2	1	1	0	1	2	0	6	0	5	5	0	5
PLSCR1	O15162	Phospholipid scramblase 1 OS=Homo sapiens GN=PLSCR1 PE=1 SV=1	Phospholipid scramblase 1	2	2	2	1	2	2	2	2	0	2	2	2	1	2	2	2	2	0	2	1	2	2	2	1	0	0	1	1	0	2	0	1	1	1	0	0	1	0	0	0	2	0	2	2	0	1
PLSCR3	Q9NRY6	Phospholipid scramblase 3 OS=Homo sapiens GN=PLSCR3 PE=1 SV=2	Phospholipid scramblase 3	4	4	4	1	4	4	4	4	0	3	3	3	1	2	2	2	1	0	4	0	2	3	3	1	0	0	3	2	0	3	1	1	0	1	0	0	0	0	1	0	4	0	4	4	2	4
PLXNA1	Q9UIW2	Plexin-A1 OS=Homo sapiens GN=PLXNA1 PE=1 SV=3	Plexin-A1	7;3;1	7;3;1	6;2;0	3	7	7	6	7	0	2	3	5	0	0	0	1	0	0	6	0	6	7	5	0	0	0	1	0	0	5	0	1	2	0	0	0	0	0	0	0	1	0	0	0	0	0
PLXNB2	O15031	Plexin-B2 OS=Homo sapiens GN=PLXNB2 PE=1 SV=3	Plexin-B2	22	22	22	1	22	22	22	22	0	17	16	17	1	10	9	14	9	0	20	1	21	21	17	8	0	0	5	0	1	15	1	5	0	0	1	1	0	1	2	1	10	0	13	11	0	12
PML	P29590	Protein PML OS=Homo sapiens GN=PML PE=1 SV=3	Protein PML	2	2	2	1	2	2	2	0	0	0	0	0	0	0	0	2	0	0	0	0	0	0	0	0	0	0	0	0	0	0	0	0	0	0	0	0	0	0	0	0	0	0	0	0	0	0
PNP	P00491	Purine nucleoside phosphorylase OS=Homo sapiens GN=PNP PE=1 SV=2	Purine nucleoside phosphorylase	7	7	7	1	7	7	7	5	3	7	7	7	1	7	5	4	4	3	5	5	5	6	3	3	2	1	1	2	1	7	3	1	2	1	1	0	2	0	2	1	6	1	4	2	0	2
POF1B	Q8WVV4	Protein POF1B OS=Homo sapiens GN=POF1B PE=1 SV=3	Protein POF1B	9	9	9	1	9	9	9	7	2	7	6	5	2	5	5	3	5	4	6	7	5	6	6	6	1	2	0	3	1	8	1	2	1	2	1	0	1	1	5	3	8	0	7	4	2	6
POLR1C	O15160	DNA-directed RNA polymerases I and III subunit RPAC1 OS=Homo sapiens GN=POLR1C PE=1 SV=1	DNA-directed RNA polymerases I and III subunit RPAC1	4	4	4	1	4	4	4	1	0	4	2	2	0	3	2	4	4	1	0	0	1	1	0	0	0	0	0	0	0	0	0	1	0	0	0	0	0	1	0	0	0	0	0	0	0	0
POLR2C	P19387	DNA-directed RNA polymerase II subunit RPB3 OS=Homo sapiens GN=POLR2C PE=1 SV=2	DNA-directed RNA polymerase II subunit RPB3	2	2	2	1	2	2	2	2	0	2	2	2	0	2	1	2	2	0	1	1	1	0	0	0	0	0	0	0	0	0	0	0	0	0	0	0	0	0	1	0	0	0	0	0	0	0
POLR2H	P52434	DNA-directed RNA polymerases I, II, and III subunit RPABC3 OS=Homo sapiens GN=POLR2H PE=1 SV=4	DNA-directed RNA polymerases I, II, and III subunit RPABC3	3	3	3	1	3	3	3	1	0	2	1	2	1	2	2	3	3	0	1	0	1	1	0	0	0	0	0	0	0	0	0	1	1	0	0	0	0	1	0	0	0	0	0	0	0	0
POR	P16435	NADPH--cytochrome P450 reductase OS=Homo sapiens GN=POR PE=1 SV=2	NADPH--cytochrome P450 reductase	17	17	17	1	17	17	17	6	0	13	14	13	4	16	12	16	15	0	7	9	7	3	5	0	0	0	0	0	0	2	0	4	0	2	1	0	0	0	4	0	2	0	4	5	0	3
POSTN	Q15063	Periostin OS=Homo sapiens GN=POSTN PE=1 SV=2	Periostin	4	2	2	1	4	2	2	1	0	0	0	1	0	0	2	2	2	0	3	0	0	2	3	0	0	0	3	1	0	4	0	0	0	0	0	0	0	0	0	0	0	0	0	0	0	0
PPA1	Q15181	Inorganic pyrophosphatase OS=Homo sapiens GN=PPA1 PE=1 SV=2	Inorganic pyrophosphatase	7	7	7	1	7	7	7	5	1	6	4	5	1	4	4	5	6	1	5	3	6	5	4	1	0	0	0	0	0	4	0	1	0	0	0	0	1	0	4	0	1	0	4	4	0	4
PPAP2A	O14494	Lipid phosphate phosphohydrolase 1 OS=Homo sapiens GN=PPAP2A PE=1 SV=1	Lipid phosphate phosphohydrolase 1	2	2	2	1	2	2	2	2	0	2	2	2	0	1	0	0	1	0	2	0	2	2	2	0	0	0	0	0	0	2	0	0	0	0	0	0	0	0	0	0	0	0	0	0	0	0
PPAP2B	O14495	Lipid phosphate phosphohydrolase 3 OS=Homo sapiens GN=PPAP2B PE=1 SV=1	Lipid phosphate phosphohydrolase 3	3	3	3	1	3	3	3	3	0	3	3	3	0	2	2	2	1	0	3	1	2	3	2	2	0	0	1	0	0	3	0	0	0	0	0	1	0	0	1	0	2	0	2	1	0	1
PPIA	P62937	Peptidyl-prolyl cis-trans isomerase A OS=Homo sapiens GN=PPIA PE=1 SV=2	Peptidyl-prolyl cis-trans isomerase A;Peptidyl-prolyl cis-trans isomerase A, N-terminally processed	11;2;2;1	11;2;2;1	11;2;2;1	4	11	11	11	10	4	11	10	11	10	10	10	11	10	8	10	9	10	11	10	9	3	4	6	4	3	10	2	11	10	10	9	6	3	10	5	3	9	5	10	8	4	8
PPIB	P23284	Peptidyl-prolyl cis-trans isomerase B OS=Homo sapiens GN=PPIB PE=1 SV=2	Peptidyl-prolyl cis-trans isomerase B	15	15	15	1	15	15	15	10	4	14	15	14	9	12	13	14	13	5	12	11	8	10	8	4	2	1	4	1	1	9	4	8	2	6	3	3	0	2	3	0	5	1	5	2	1	1
PPM1G	O15355	Protein phosphatase 1G OS=Homo sapiens GN=PPM1G PE=1 SV=1	Protein phosphatase 1G	3	3	3	1	3	3	3	0	0	2	2	2	2	1	2	3	1	0	0	1	0	0	1	0	0	0	0	1	0	0	0	1	0	2	0	0	0	0	2	0	1	0	1	1	0	1
PPP1CA	P62136	Serine/threonine-protein phosphatase PP1-alpha catalytic subunit OS=Homo sapiens GN=PPP1CA PE=1 SV=1	Serine/threonine-protein phosphatase PP1-alpha catalytic subunit	10	10	4	1	10	10	4	8	1	9	8	9	2	7	7	10	8	2	9	4	7	6	5	2	0	1	2	2	0	5	1	2	0	2	1	0	0	2	3	0	4	0	2	1	0	0
PPP1CB	P62140	Serine/threonine-protein phosphatase PP1-beta catalytic subunit OS=Homo sapiens GN=PPP1CB PE=1 SV=3	Serine/threonine-protein phosphatase PP1-beta catalytic subunit	8	4	4	1	8	4	4	4	0	5	5	5	0	5	4	7	5	0	4	3	5	5	3	1	0	0	2	1	0	3	1	1	1	0	0	1	0	2	2	0	2	0	1	1	0	0
PPP1CC	P36873	Serine/threonine-protein phosphatase PP1-gamma catalytic subunit OS=Homo sapiens GN=PPP1CC PE=1 SV=1	Serine/threonine-protein phosphatase PP1-gamma catalytic subunit	8	2	2	1	8	2	2	6	0	6	5	6	0	4	4	7	5	0	6	3	3	4	3	1	0	0	1	1	0	2	0	0	0	0	0	0	0	1	2	0	2	0	1	1	0	0
PPP1R12A	O14974	Protein phosphatase 1 regulatory subunit 12A OS=Homo sapiens GN=PPP1R12A PE=1 SV=1	Protein phosphatase 1 regulatory subunit 12A	3	3	3	1	3	3	3	1	0	2	2	2	2	2	1	2	1	1	1	1	2	2	1	1	1	0	1	1	0	0	1	2	0	1	0	0	0	1	0	0	1	0	1	0	0	1
PPP1R7	Q15435	Protein phosphatase 1 regulatory subunit 7 OS=Homo sapiens GN=PPP1R7 PE=1 SV=1	Protein phosphatase 1 regulatory subunit 7	8	8	8	1	8	8	8	5	0	5	6	5	3	6	5	7	7	2	5	5	4	6	3	2	0	0	2	1	0	4	0	3	0	3	0	0	1	2	4	0	4	0	5	3	0	2
PPP2CA	P67775	Serine/threonine-protein phosphatase 2A catalytic subunit alpha isoform OS=Homo sapiens GN=PPP2CA PE=1 SV=1;Serine/threonine-protein phosphatase 2A catalytic subunit beta isoform OS=Homo sapiens GN=PPP2CB PE=1 SV=1	Serine/threonine-protein phosphatase 2A catalytic subunit alpha isoform;Serine/threonine-protein phosphatase 2A catalytic subunit beta isoform	10;9	10;9	9;8	2	10	10	9	8	0	8	7	9	1	9	8	9	8	2	7	4	6	6	3	1	0	1	1	0	0	2	0	2	1	2	1	2	1	0	3	0	3	0	4	3	0	3
PPP2R1A	P30153	Serine/threonine-protein phosphatase 2A 65 kDa regulatory subunit A alpha isoform OS=Homo sapiens GN=PPP2R1A PE=1 SV=4	Serine/threonine-protein phosphatase 2A 65 kDa regulatory subunit A alpha isoform	17	17	13	1	17	17	13	12	0	14	13	12	9	10	10	16	11	1	12	8	13	10	6	2	0	1	3	0	0	5	0	7	3	6	3	2	1	2	6	0	6	0	9	7	1	3
PPP2R1B	P30154	Serine/threonine-protein phosphatase 2A 65 kDa regulatory subunit A beta isoform OS=Homo sapiens GN=PPP2R1B PE=1 SV=3	Serine/threonine-protein phosphatase 2A 65 kDa regulatory subunit A beta isoform	6	2	2	1	6	2	2	3	0	5	3	5	2	4	3	6	4	0	3	2	4	4	1	1	0	0	0	0	0	1	0	1	1	1	1	0	0	0	1	0	2	0	2	2	0	1
PPP2R2A	P63151	Serine/threonine-protein phosphatase 2A 55 kDa regulatory subunit B alpha isoform OS=Homo sapiens GN=PPP2R2A PE=1 SV=1	Serine/threonine-protein phosphatase 2A 55 kDa regulatory subunit B alpha isoform	7;2;2;1	7;2;2;1	7;2;2;1	4	7	7	7	4	0	4	4	4	1	4	3	5	5	0	4	3	3	4	2	2	0	0	1	0	0	2	0	3	1	2	2	0	0	1	0	1	1	0	1	0	0	2
PPP2R4	Q15257	Serine/threonine-protein phosphatase 2A activator OS=Homo sapiens GN=PPP2R4 PE=1 SV=3	Serine/threonine-protein phosphatase 2A activator	3	3	3	1	3	3	3	3	0	3	3	3	0	3	2	2	2	0	3	1	2	2	1	1	0	0	0	0	0	3	0	1	1	1	0	0	0	0	1	0	3	0	1	1	0	0
PPP3CA	Q08209	Serine/threonine-protein phosphatase 2B catalytic subunit alpha isoform OS=Homo sapiens GN=PPP3CA PE=1 SV=1	Serine/threonine-protein phosphatase 2B catalytic subunit alpha isoform	3;1	3;1	3;1	2	3	3	3	2	0	2	2	2	1	0	0	2	2	0	2	1	3	3	2	1	0	2	1	0	0	2	0	1	0	0	0	0	0	0	1	0	1	0	1	1	0	0
PPP4C	P60510	Serine/threonine-protein phosphatase 4 catalytic subunit OS=Homo sapiens GN=PPP4C PE=1 SV=1	Serine/threonine-protein phosphatase 4 catalytic subunit	3	2	2	1	3	2	2	1	0	3	2	2	0	3	2	3	3	0	2	0	1	2	0	0	1	0	0	0	0	1	0	0	0	0	0	0	0	0	0	0	0	0	1	0	0	0
PPP5C	P53041	Serine/threonine-protein phosphatase 5 OS=Homo sapiens GN=PPP5C PE=1 SV=1	Serine/threonine-protein phosphatase 5	3	3	3	1	3	3	3	2	0	2	2	2	1	2	0	2	2	0	2	0	1	1	0	0	0	0	0	0	0	0	0	1	0	1	0	0	0	0	1	0	1	0	0	1	0	0
PPP6C	O00743	Serine/threonine-protein phosphatase 6 catalytic subunit OS=Homo sapiens GN=PPP6C PE=1 SV=1	Serine/threonine-protein phosphatase 6 catalytic subunit;Serine/threonine-protein phosphatase 6 catalytic subunit, N-terminally processed	2	2	2	1	2	2	2	1	0	2	1	2	0	2	1	2	2	0	2	0	1	1	0	0	0	0	0	0	0	0	0	0	0	0	0	0	0	0	0	0	0	0	0	0	0	0
PRCP	P42785	Lysosomal Pro-X carboxypeptidase OS=Homo sapiens GN=PRCP PE=1 SV=1	Lysosomal Pro-X carboxypeptidase	3	3	3	1	3	3	3	3	0	3	3	3	1	2	1	3	2	2	3	1	2	2	1	2	0	0	1	0	0	3	2	1	0	0	0	0	0	0	1	0	3	0	0	1	0	0
PRDX1	Q06830	Peroxiredoxin-1 OS=Homo sapiens GN=PRDX1 PE=1 SV=1	Peroxiredoxin-1	19	19	15	1	19	19	15	14	9	17	16	17	12	16	13	14	13	11	13	12	10	10	11	12	6	7	11	9	6	11	10	14	13	10	8	6	7	10	11	7	14	6	10	11	5	9
PRDX2	P32119	Peroxiredoxin-2 OS=Homo sapiens GN=PRDX2 PE=1 SV=5	Peroxiredoxin-2	13	12	12	1	13	12	12	13	8	13	13	13	10	13	12	10	12	9	13	12	11	11	11	12	7	7	8	7	6	12	11	11	8	10	6	5	5	8	7	4	12	5	10	10	6	10
PRDX4	Q13162	Peroxiredoxin-4 OS=Homo sapiens GN=PRDX4 PE=1 SV=1	Peroxiredoxin-4	11	8	8	1	11	8	8	9	2	10	9	10	4	10	10	11	10	5	9	8	7	7	6	6	2	2	2	3	1	8	4	3	2	4	1	1	3	2	4	1	9	2	6	6	1	5
PRDX5	P30044	Peroxiredoxin-5, mitochondrial OS=Homo sapiens GN=PRDX5 PE=1 SV=4	Peroxiredoxin-5, mitochondrial	9	9	9	1	9	9	9	8	0	9	9	9	2	9	5	8	7	1	7	6	6	7	7	2	0	0	0	0	0	7	0	3	1	2	0	0	0	2	2	0	6	0	4	1	1	1
PRDX6	P30041	Peroxiredoxin-6 OS=Homo sapiens GN=PRDX6 PE=1 SV=3	Peroxiredoxin-6	13	13	13	1	13	13	13	12	0	11	11	12	5	11	9	10	9	1	12	8	12	12	10	6	1	0	2	2	0	11	2	8	4	6	2	2	2	4	6	0	10	0	7	9	1	7
PREP	P48147	Prolyl endopeptidase OS=Homo sapiens GN=PREP PE=1 SV=2	Prolyl endopeptidase	3	3	3	1	3	3	3	2	0	3	3	2	0	3	3	3	2	0	2	2	2	3	2	1	0	0	0	0	0	2	1	0	0	0	0	0	0	0	1	0	2	0	1	1	0	2
PRKAR1A	P10644	cAMP-dependent protein kinase type I-alpha regulatory subunit OS=Homo sapiens GN=PRKAR1A PE=1 SV=1	cAMP-dependent protein kinase type I-alpha regulatory subunit;cAMP-dependent protein kinase type I-alpha regulatory subunit, N-terminally processed	3	3	3	1	3	3	3	3	0	2	2	3	0	2	2	3	3	2	3	0	2	2	2	0	0	0	1	0	0	2	0	0	0	0	0	0	0	0	0	0	2	0	1	1	0	0
PRKAR2A	P13861	cAMP-dependent protein kinase type II-alpha regulatory subunit OS=Homo sapiens GN=PRKAR2A PE=1 SV=2	cAMP-dependent protein kinase type II-alpha regulatory subunit	8;1	8;1	8;1	2	8	8	8	6	0	6	4	6	1	5	4	8	7	0	5	1	3	3	2	0	0	0	1	0	0	2	0	1	0	1	0	0	0	0	3	0	0	0	1	2	0	0
PRKCA	P17252	Protein kinase C alpha type OS=Homo sapiens GN=PRKCA PE=1 SV=4;Protein kinase C beta type OS=Homo sapiens GN=PRKCB PE=1 SV=4	Protein kinase C alpha type;Protein kinase C beta type	4;2;1	4;2;1	4;2;1	3	4	4	4	2	0	2	2	2	1	3	1	4	3	0	2	0	3	2	2	0	0	0	0	0	0	2	0	1	0	0	0	0	0	0	1	0	0	0	1	0	0	0
PRKCD	Q05655	Protein kinase C delta type OS=Homo sapiens GN=PRKCD PE=1 SV=2	Protein kinase C delta type;Protein kinase C delta type regulatory subunit;Protein kinase C delta type catalytic subunit	7	7	7	1	7	7	7	2	0	5	4	3	0	4	2	3	3	0	2	1	1	1	0	0	0	0	0	0	0	1	0	2	0	0	0	0	0	0	1	0	0	0	1	2	0	0
PRKCDBP	Q969G5	Protein kinase C delta-binding protein OS=Homo sapiens GN=PRKCDBP PE=1 SV=3	Protein kinase C delta-binding protein	2	2	2	1	2	2	2	2	0	2	2	2	1	2	2	2	2	0	2	1	1	1	1	0	0	0	0	0	0	1	0	1	0	0	0	0	0	0	0	0	1	0	1	1	0	1
PRKCI	P41743	Protein kinase C iota type OS=Homo sapiens GN=PRKCI PE=1 SV=2	Protein kinase C iota type	2	2	2	1	2	2	2	0	0	0	0	0	0	0	0	2	1	0	0	0	0	0	0	0	0	0	0	0	0	0	0	0	1	0	0	0	0	0	1	0	0	0	1	0	0	0
PRKCSH	P14314	Glucosidase 2 subunit beta OS=Homo sapiens GN=PRKCSH PE=1 SV=2	Glucosidase 2 subunit beta	9	9	9	1	9	9	9	6	0	8	6	9	7	7	6	8	7	4	5	5	5	4	5	1	0	0	2	0	0	6	2	7	2	6	2	2	1	3	3	1	5	1	4	5	1	3
PRKDC	P78527	DNA-dependent protein kinase catalytic subunit OS=Homo sapiens GN=PRKDC PE=1 SV=3	DNA-dependent protein kinase catalytic subunit	28	28	28	1	28	28	28	7	0	4	5	5	0	5	3	27	21	0	0	1	1	0	3	1	0	1	1	1	0	2	1	1	1	1	1	1	0	1	9	0	1	0	1	2	0	1
PRMT1	Q99873	Protein arginine N-methyltransferase 1 OS=Homo sapiens GN=PRMT1 PE=1 SV=2	Protein arginine N-methyltransferase 1	12;2	12;2	12;2	2	12	12	12	5	1	10	5	9	1	5	5	12	8	3	4	3	2	1	3	2	0	0	1	0	0	3	1	2	0	2	1	0	0	0	4	0	3	0	4	3	0	2
PRMT5	O14744	Protein arginine N-methyltransferase 5 OS=Homo sapiens GN=PRMT5 PE=1 SV=4	Protein arginine N-methyltransferase 5;Protein arginine N-methyltransferase 5, N-terminally processed	4	4	4	1	4	4	4	3	0	3	2	3	0	3	2	4	4	1	2	2	2	2	3	0	0	0	0	0	0	2	0	0	0	0	0	0	0	0	0	0	2	0	0	0	0	0
PRNP	P04156	Major prion protein OS=Homo sapiens GN=PRNP PE=1 SV=1	Major prion protein	2	2	2	1	2	2	2	1	0	0	0	1	0	0	1	0	1	0	1	0	1	1	1	1	0	0	1	1	0	1	0	0	0	0	0	0	0	0	1	0	0	0	1	1	0	0
PRPF19	Q9UMS4	Pre-mRNA-processing factor 19 OS=Homo sapiens GN=PRPF19 PE=1 SV=1	Pre-mRNA-processing factor 19	8	8	8	1	8	8	8	1	0	7	7	7	3	6	6	8	7	2	0	7	1	1	0	2	0	0	0	1	0	0	1	2	0	2	0	0	0	0	3	0	1	0	0	0	0	0
PRPF40A	O75400	Pre-mRNA-processing factor 40 homolog A OS=Homo sapiens GN=PRPF40A PE=1 SV=2	Pre-mRNA-processing factor 40 homolog A	5	5	5	1	5	5	5	0	0	1	0	1	1	0	1	4	4	0	0	0	0	0	0	0	0	0	1	1	0	0	0	0	0	0	0	0	0	0	0	0	0	0	1	0	0	0
PRPF8	Q6P2Q9	Pre-mRNA-processing-splicing factor 8 OS=Homo sapiens GN=PRPF8 PE=1 SV=2	Pre-mRNA-processing-splicing factor 8	28	28	28	1	28	28	28	5	0	8	3	9	1	5	9	28	22	0	1	1	1	1	2	2	0	0	0	0	0	1	1	2	0	0	0	0	0	2	4	0	0	0	1	2	0	2
PRPS1	P60891	Ribose-phosphate pyrophosphokinase 1 OS=Homo sapiens GN=PRPS1 PE=1 SV=2;Ribose-phosphate pyrophosphokinase 2 OS=Homo sapiens GN=PRPS2 PE=1 SV=2;Ribose-phosphate pyrophosphokinase 3 OS=Homo sapiens GN=PRPS1L1 PE=1 SV=2	Ribose-phosphate pyrophosphokinase 1;Ribose-phosphate pyrophosphokinase 2;Ribose-phosphate pyrophosphokinase 3	2;1;1	2;1;1	2;1;1	3	2	2	2	2	0	2	2	2	0	1	1	2	2	0	1	0	1	2	0	0	0	0	1	0	0	0	0	1	0	1	0	0	0	0	0	0	0	0	0	0	0	0
PRPSAP1	Q14558	Phosphoribosyl pyrophosphate synthase-associated protein 1 OS=Homo sapiens GN=PRPSAP1 PE=1 SV=2	Phosphoribosyl pyrophosphate synthase-associated protein 1	4	4	3	1	4	4	3	2	0	2	3	4	0	2	3	4	4	0	0	1	0	1	0	0	0	0	1	0	0	0	0	1	0	0	0	0	0	0	1	0	1	0	1	0	0	0
PRPSAP2	O60256	Phosphoribosyl pyrophosphate synthase-associated protein 2 OS=Homo sapiens GN=PRPSAP2 PE=1 SV=1	Phosphoribosyl pyrophosphate synthase-associated protein 2	3	2	2	1	3	2	2	1	0	2	2	2	0	3	2	3	1	2	1	1	1	1	0	0	0	0	1	0	0	0	0	2	0	0	0	0	0	0	0	0	0	0	0	0	0	0
PRRC1	Q96M27	Protein PRRC1 OS=Homo sapiens GN=PRRC1 PE=1 SV=1	Protein PRRC1	2	2	2	1	2	2	2	0	0	0	0	0	0	0	0	1	0	0	0	0	0	0	0	0	0	0	0	0	0	0	0	0	0	0	0	0	0	0	1	0	0	0	0	1	0	0
PRSS23	O95084	Serine protease 23 OS=Homo sapiens GN=PRSS23 PE=1 SV=1	Serine protease 23	3	3	3	1	3	3	3	1	0	0	0	0	0	0	0	3	1	0	1	0	2	2	2	0	0	0	2	1	0	2	0	0	0	0	0	0	0	0	0	0	0	0	0	0	0	0
PSAP	P07602	Prosaposin OS=Homo sapiens GN=PSAP PE=1 SV=2	Prosaposin;Saposin-A;Saposin-B-Val;Saposin-B;Saposin-C;Saposin-D	5	5	5	1	5	5	5	4	1	4	4	5	1	4	4	3	3	0	2	2	3	4	2	0	1	1	0	0	0	2	1	1	1	1	1	0	0	0	0	0	0	0	0	0	0	0
PSAT1	Q9Y617	Phosphoserine aminotransferase OS=Homo sapiens GN=PSAT1 PE=1 SV=2	Phosphoserine aminotransferase	6	6	6	1	6	6	6	6	0	5	5	4	1	6	6	6	3	0	6	1	5	6	5	1	0	0	1	0	0	3	0	2	0	1	0	0	0	0	3	0	1	0	1	3	0	1
PSEN1	P49768	Presenilin-1 OS=Homo sapiens GN=PSEN1 PE=1 SV=1	Presenilin-1;Presenilin-1 NTF subunit;Presenilin-1 CTF subunit;Presenilin-1 CTF12	3;1	3;1	3;1	2	3	3	3	3	0	3	3	3	0	3	3	1	3	0	2	0	1	2	2	2	0	0	0	0	0	3	0	1	0	0	0	0	0	0	0	0	1	0	3	3	0	0
PSMA1	P25786	Proteasome subunit alpha type-1 OS=Homo sapiens GN=PSMA1 PE=1 SV=1	Proteasome subunit alpha type-1	5	5	5	1	5	5	5	3	3	5	3	5	3	3	4	4	4	4	4	3	3	5	3	3	0	0	2	2	1	3	3	3	1	1	0	0	0	1	2	0	3	0	3	2	0	2
PSMA2	P25787	Proteasome subunit alpha type-2 OS=Homo sapiens GN=PSMA2 PE=1 SV=2	Proteasome subunit alpha type-2	8	8	8	1	8	8	8	5	1	7	6	6	2	6	4	7	6	1	5	7	5	4	3	5	0	1	0	1	1	4	1	3	2	2	1	0	0	0	2	2	5	1	4	5	0	6
PSMA3	P25788	Proteasome subunit alpha type-3 OS=Homo sapiens GN=PSMA3 PE=1 SV=2	Proteasome subunit alpha type-3	7	7	7	1	7	7	7	4	2	5	5	5	2	5	5	5	5	4	5	3	4	5	4	4	2	3	2	3	1	4	3	4	4	2	3	1	0	3	4	1	3	0	5	5	0	4
PSMA4	P25789	Proteasome subunit alpha type-4 OS=Homo sapiens GN=PSMA4 PE=1 SV=1	Proteasome subunit alpha type-4	7	7	7	1	7	7	7	5	0	5	4	4	1	4	5	5	4	2	5	3	6	5	3	2	0	1	3	1	0	4	2	1	2	1	1	0	1	2	5	1	2	0	5	6	0	5
PSMA5	P28066	Proteasome subunit alpha type-5 OS=Homo sapiens GN=PSMA5 PE=1 SV=3	Proteasome subunit alpha type-5	8	8	8	1	8	8	8	7	4	7	8	7	3	7	7	8	8	6	8	8	8	7	5	4	1	4	2	3	2	8	5	4	4	4	2	3	2	2	3	2	8	1	5	6	2	5
PSMA6	P60900	Proteasome subunit alpha type-6 OS=Homo sapiens GN=PSMA6 PE=1 SV=1	Proteasome subunit alpha type-6	6	6	6	1	6	6	6	6	2	6	6	6	3	6	5	4	5	5	6	5	6	6	4	4	1	0	2	2	0	6	4	3	1	2	0	1	0	1	4	0	5	0	4	3	0	3
PSMA7	O14818	Proteasome subunit alpha type-7 OS=Homo sapiens GN=PSMA7 PE=1 SV=1	Proteasome subunit alpha type-7	11;5	11;5	11;5	2	11	11	11	10	4	11	11	11	7	11	10	11	11	6	9	7	6	6	8	7	2	2	4	2	3	7	5	7	2	4	2	0	2	2	5	1	8	0	8	7	0	6
PSMB1	P20618	Proteasome subunit beta type-1 OS=Homo sapiens GN=PSMB1 PE=1 SV=2	Proteasome subunit beta type-1	7	7	7	1	7	7	7	7	3	6	7	7	3	5	6	7	6	3	6	5	6	5	6	5	2	3	2	2	1	6	4	3	2	3	4	0	0	1	3	1	5	0	5	6	0	5
PSMB2	P49721	Proteasome subunit beta type-2 OS=Homo sapiens GN=PSMB2 PE=1 SV=1	Proteasome subunit beta type-2	5	5	5	1	5	5	5	4	1	5	5	4	3	5	5	4	4	3	4	2	3	3	2	2	1	2	1	1	0	3	2	1	2	0	1	1	1	1	3	1	4	2	2	2	1	2
PSMB3	P49720	Proteasome subunit beta type-3 OS=Homo sapiens GN=PSMB3 PE=1 SV=2	Proteasome subunit beta type-3	4	4	4	1	4	4	4	4	0	4	4	4	1	4	4	3	4	4	4	4	3	3	4	3	0	1	1	0	0	4	2	1	2	1	1	0	0	0	3	0	3	0	4	4	0	3
PSMB4	P28070	Proteasome subunit beta type-4 OS=Homo sapiens GN=PSMB4 PE=1 SV=4	Proteasome subunit beta type-4	6	6	6	1	6	6	6	4	2	6	4	6	2	4	5	6	5	5	3	5	5	4	5	5	1	0	3	1	1	6	3	3	1	1	1	0	1	0	4	0	6	1	4	3	1	4
PSMB5	P28074	Proteasome subunit beta type-5 OS=Homo sapiens GN=PSMB5 PE=1 SV=3	Proteasome subunit beta type-5	7	7	7	1	7	7	7	7	6	7	7	7	6	7	7	7	7	7	7	7	7	7	7	6	0	2	4	6	1	6	7	5	2	5	1	1	0	1	5	2	7	0	6	6	0	6
PSMB6	P28072	Proteasome subunit beta type-6 OS=Homo sapiens GN=PSMB6 PE=1 SV=4	Proteasome subunit beta type-6	4	4	4	1	4	4	4	4	2	4	4	4	4	4	3	3	4	1	4	4	3	4	4	3	1	2	2	2	1	4	2	4	2	3	2	2	2	2	2	1	3	0	4	4	0	4
PSMC1	P62191	26S protease regulatory subunit 4 OS=Homo sapiens GN=PSMC1 PE=1 SV=1	26S protease regulatory subunit 4	19	19	19	1	19	19	19	8	0	13	10	12	5	11	11	19	15	5	5	5	5	7	3	0	0	0	2	0	0	2	1	4	0	4	1	0	0	2	6	1	1	0	2	1	0	2
PSMC2	P35998	26S protease regulatory subunit 7 OS=Homo sapiens GN=PSMC2 PE=1 SV=3	26S protease regulatory subunit 7	24	24	24	1	24	24	24	12	0	18	16	19	6	16	14	24	19	2	9	8	10	9	6	1	0	1	6	1	0	5	1	9	2	7	2	0	0	3	11	0	1	0	4	2	0	3
PSMC3	P17980	26S protease regulatory subunit 6A OS=Homo sapiens GN=PSMC3 PE=1 SV=3	26S protease regulatory subunit 6A	16	16	16	1	16	16	16	10	0	10	13	11	6	14	14	16	13	8	10	10	6	7	4	1	0	0	5	1	0	7	2	5	2	5	3	0	0	4	9	3	3	0	6	6	0	4
PSMC4	P43686	26S protease regulatory subunit 6B OS=Homo sapiens GN=PSMC4 PE=1 SV=2	26S protease regulatory subunit 6B	16	16	16	1	16	16	16	10	0	13	14	14	2	13	11	16	14	3	8	10	6	5	5	2	0	0	4	2	0	6	0	7	0	2	2	0	0	3	5	0	5	1	5	3	0	2
PSMC5	P62195	26S protease regulatory subunit 8 OS=Homo sapiens GN=PSMC5 PE=1 SV=1	26S protease regulatory subunit 8	17	17	16	1	17	17	16	7	1	12	13	11	6	11	8	16	16	5	5	5	4	5	4	0	0	0	5	2	0	4	0	5	3	6	3	1	1	4	6	2	2	0	3	3	0	3
PSMC6	P62333	26S protease regulatory subunit 10B OS=Homo sapiens GN=PSMC6 PE=1 SV=1	26S protease regulatory subunit 10B	18	18	18	1	18	18	18	9	0	11	14	12	2	11	10	18	15	1	5	7	6	7	2	0	0	0	4	1	0	2	0	4	1	2	1	0	1	2	6	0	1	0	3	2	1	2
PSMD1	Q99460	26S proteasome non-ATPase regulatory subunit 1 OS=Homo sapiens GN=PSMD1 PE=1 SV=2	26S proteasome non-ATPase regulatory subunit 1	24	24	24	1	24	24	24	12	0	16	16	18	6	19	16	23	23	10	7	15	6	5	4	0	0	0	1	1	1	5	2	7	1	9	1	1	2	0	8	0	2	1	3	2	0	3
PSMD11	O00231	26S proteasome non-ATPase regulatory subunit 11 OS=Homo sapiens GN=PSMD11 PE=1 SV=3	26S proteasome non-ATPase regulatory subunit 11	21	21	21	1	21	21	21	11	0	18	17	16	4	17	18	19	19	10	8	14	10	10	7	1	0	1	5	2	0	5	1	4	3	2	1	1	0	6	10	3	5	0	2	3	0	2
PSMD12	O00232	26S proteasome non-ATPase regulatory subunit 12 OS=Homo sapiens GN=PSMD12 PE=1 SV=3	26S proteasome non-ATPase regulatory subunit 12	13	13	13	1	13	13	13	7	0	7	8	8	2	8	9	13	11	3	7	7	5	6	3	2	0	1	1	2	0	2	0	4	0	3	1	0	0	1	3	0	1	0	1	1	0	1
PSMD13	Q9UNM6	26S proteasome non-ATPase regulatory subunit 13 OS=Homo sapiens GN=PSMD13 PE=1 SV=2	26S proteasome non-ATPase regulatory subunit 13	18	18	18	1	18	18	18	8	0	13	13	13	4	14	12	15	15	6	9	8	6	4	4	3	0	0	4	2	1	5	0	3	1	3	1	1	0	2	9	1	4	1	6	6	0	2
PSMD14	O00487	26S proteasome non-ATPase regulatory subunit 14 OS=Homo sapiens GN=PSMD14 PE=1 SV=1	26S proteasome non-ATPase regulatory subunit 14	9	9	9	1	9	9	9	7	0	8	8	9	5	7	7	9	7	6	7	6	6	5	3	3	0	0	3	1	0	5	2	4	0	4	1	0	2	3	5	0	4	1	5	2	0	3
PSMD2	Q13200	26S proteasome non-ATPase regulatory subunit 2 OS=Homo sapiens GN=PSMD2 PE=1 SV=3	26S proteasome non-ATPase regulatory subunit 2	24	24	24	1	24	24	24	15	0	22	21	20	11	20	17	24	20	6	14	12	11	12	5	1	1	1	10	1	0	6	1	14	2	9	2	0	0	5	9	1	4	0	4	4	0	2
PSMD3	O43242	26S proteasome non-ATPase regulatory subunit 3 OS=Homo sapiens GN=PSMD3 PE=1 SV=2	26S proteasome non-ATPase regulatory subunit 3	26	26	26	1	26	26	26	8	0	19	18	17	4	16	17	25	25	4	11	12	4	3	4	3	0	1	4	1	0	8	0	4	0	5	1	0	1	5	8	0	4	0	1	4	0	2
PSMD4	P55036	26S proteasome non-ATPase regulatory subunit 4 OS=Homo sapiens GN=PSMD4 PE=1 SV=1	26S proteasome non-ATPase regulatory subunit 4	5;1	5;1	5;1	2	5	5	5	3	0	4	4	5	1	5	5	5	5	0	1	1	1	1	1	0	0	0	0	0	0	2	0	0	0	0	0	0	0	0	1	0	1	0	0	0	0	1
PSMD5	Q16401	26S proteasome non-ATPase regulatory subunit 5 OS=Homo sapiens GN=PSMD5 PE=1 SV=3	26S proteasome non-ATPase regulatory subunit 5	5	5	5	1	5	5	5	3	0	3	4	3	1	4	3	3	4	1	2	1	4	3	3	0	0	0	0	0	0	1	0	1	0	0	0	0	0	0	3	0	1	0	2	0	0	1
PSMD6	Q15008	26S proteasome non-ATPase regulatory subunit 6 OS=Homo sapiens GN=PSMD6 PE=1 SV=1	26S proteasome non-ATPase regulatory subunit 6	18	18	18	1	18	18	18	9	0	16	15	17	7	18	15	18	16	6	8	15	3	4	2	0	0	0	4	0	0	2	0	6	0	5	0	0	0	2	3	0	3	0	2	1	0	0
PSMD7	P51665	26S proteasome non-ATPase regulatory subunit 7 OS=Homo sapiens GN=PSMD7 PE=1 SV=2	26S proteasome non-ATPase regulatory subunit 7	12	12	12	1	12	12	12	3	0	8	6	9	1	7	6	11	11	4	3	6	1	2	1	0	0	0	0	1	0	2	0	3	1	1	0	1	0	1	4	1	0	0	0	0	0	1
PSMD8	P48556	26S proteasome non-ATPase regulatory subunit 8 OS=Homo sapiens GN=PSMD8 PE=1 SV=2	26S proteasome non-ATPase regulatory subunit 8	9	9	9	1	9	9	9	4	0	6	6	6	4	5	8	9	7	4	3	6	3	3	4	1	0	0	1	1	0	3	1	4	1	2	1	1	1	0	5	0	2	1	3	2	0	2
PSMD9	O00233	26S proteasome non-ATPase regulatory subunit 9 OS=Homo sapiens GN=PSMD9 PE=1 SV=3	26S proteasome non-ATPase regulatory subunit 9	2	2	2	1	2	2	2	2	0	1	2	2	0	1	2	2	2	0	1	0	2	0	1	0	0	0	0	0	0	1	0	1	0	1	0	0	0	0	1	0	0	0	2	1	0	1
PSME1	Q06323	Proteasome activator complex subunit 1 OS=Homo sapiens GN=PSME1 PE=1 SV=1	Proteasome activator complex subunit 1	9	9	9	1	9	9	9	6	0	7	6	7	1	7	4	3	5	0	5	0	5	5	3	1	0	0	0	0	0	4	0	0	1	0	0	0	0	0	0	0	3	1	1	1	0	1
PSME2	Q9UL46	Proteasome activator complex subunit 2 OS=Homo sapiens GN=PSME2 PE=1 SV=4	Proteasome activator complex subunit 2	5	5	5	1	5	5	5	4	0	4	3	4	1	3	3	3	4	0	3	1	2	3	1	0	0	0	1	0	0	2	0	1	1	1	0	0	0	0	2	0	1	0	1	0	0	0
PSME3	P61289	Proteasome activator complex subunit 3 OS=Homo sapiens GN=PSME3 PE=1 SV=1	Proteasome activator complex subunit 3	4	4	4	1	4	4	4	0	0	4	4	4	0	3	3	3	3	2	0	3	0	0	0	0	0	0	0	0	0	0	0	0	0	0	0	0	0	0	3	0	0	0	0	0	0	0
PSPC1	Q8WXF1	Paraspeckle component 1 OS=Homo sapiens GN=PSPC1 PE=1 SV=1	Paraspeckle component 1	4	4	4	1	4	4	4	0	0	3	3	3	0	1	1	4	3	0	0	0	0	0	0	0	0	0	0	0	0	0	0	1	0	0	0	0	0	0	0	0	0	0	0	0	0	0
PTBP1	P26599	Polypyrimidine tract-binding protein 1 OS=Homo sapiens GN=PTBP1 PE=1 SV=1	Polypyrimidine tract-binding protein 1	9;1	9;1	9;1	2	9	9	9	4	1	9	8	8	6	9	5	7	7	0	2	4	3	3	0	0	0	0	0	0	0	0	0	5	1	2	0	0	0	1	1	0	1	0	1	0	0	1
PTGES2	Q9H7Z7	Prostaglandin E synthase 2 OS=Homo sapiens GN=PTGES2 PE=1 SV=1	Prostaglandin E synthase 2;Prostaglandin E synthase 2 truncated form	6	6	6	1	6	6	6	3	0	5	5	4	1	5	2	4	3	0	1	3	1	2	2	1	0	0	0	0	0	0	1	2	0	1	0	0	0	0	2	0	0	0	2	1	0	1
PTGES3	Q15185	Prostaglandin E synthase 3 OS=Homo sapiens GN=PTGES3 PE=1 SV=1	Prostaglandin E synthase 3	3	3	3	1	3	3	3	2	0	2	2	2	0	2	2	3	3	0	2	1	2	1	1	0	0	0	1	0	0	0	0	1	0	1	1	0	0	1	0	0	0	0	0	0	0	0
PTGFRN	Q9P2B2	Prostaglandin F2 receptor negative regulator OS=Homo sapiens GN=PTGFRN PE=1 SV=2	Prostaglandin F2 receptor negative regulator	4	4	4	1	4	4	4	2	0	3	3	3	3	2	2	2	1	0	3	0	3	3	2	0	0	0	0	0	0	0	0	3	2	3	0	0	0	0	0	0	0	0	0	0	0	0
PTGR1	Q14914	Prostaglandin reductase 1 OS=Homo sapiens GN=PTGR1 PE=1 SV=2	Prostaglandin reductase 1	6	6	6	1	6	6	6	5	0	5	5	5	2	5	4	4	4	0	5	0	4	4	3	0	0	0	0	0	0	3	0	2	0	2	0	0	0	0	1	0	1	0	2	2	0	1
PTK7	Q13308	Inactive tyrosine-protein kinase 7 OS=Homo sapiens GN=PTK7 PE=1 SV=2	Inactive tyrosine-protein kinase 7	20	20	20	1	20	20	20	20	0	9	10	15	1	4	1	11	4	0	20	0	17	19	17	7	0	0	10	0	0	16	0	3	2	3	0	0	0	0	3	0	16	0	18	18	1	11
PTMS	P20962	Parathymosin OS=Homo sapiens GN=PTMS PE=1 SV=2	Parathymosin	2	2	2	1	2	2	2	0	0	0	1	1	1	1	1	1	1	0	0	0	0	1	0	0	0	0	0	0	0	0	0	1	2	2	1	1	0	0	0	0	0	0	0	0	0	0
PTPN1	P18031	Tyrosine-protein phosphatase non-receptor type 1 OS=Homo sapiens GN=PTPN1 PE=1 SV=1	Tyrosine-protein phosphatase non-receptor type 1	4	4	4	1	4	4	4	2	0	2	2	2	0	1	2	4	4	0	2	0	2	3	3	0	0	0	0	0	0	2	0	0	0	0	0	0	0	0	1	0	2	0	2	0	0	0
PTPRA	P18433	Receptor-type tyrosine-protein phosphatase alpha OS=Homo sapiens GN=PTPRA PE=1 SV=2	Receptor-type tyrosine-protein phosphatase alpha	3	3	3	1	3	3	3	3	0	3	3	3	0	0	0	1	0	0	2	0	3	3	1	0	0	0	0	0	0	0	0	0	0	0	0	0	0	0	0	0	0	0	1	1	0	0
PTPRC	P08575	Receptor-type tyrosine-protein phosphatase C OS=Homo sapiens GN=PTPRC PE=1 SV=2	Receptor-type tyrosine-protein phosphatase C	2	2	2	1	2	2	2	2	0	0	2	2	0	0	0	0	0	0	2	0	2	2	2	0	0	0	0	0	0	1	0	0	0	0	0	0	0	0	0	0	0	0	0	0	0	0
PTPRF	P10586	Receptor-type tyrosine-protein phosphatase F OS=Homo sapiens GN=PTPRF PE=1 SV=2;Receptor-type tyrosine-protein phosphatase delta OS=Homo sapiens GN=PTPRD PE=1 SV=2;Receptor-type tyrosine-protein phosphatase S OS=Homo sapiens GN=PTPRS PE=1 SV=3	Receptor-type tyrosine-protein phosphatase F;Receptor-type tyrosine-protein phosphatase delta;Receptor-type tyrosine-protein phosphatase S	2;1;1	2;1;1	2;1;1	3	2	2	2	2	0	0	0	0	0	0	0	1	0	0	1	0	2	2	1	0	0	0	0	0	0	0	0	0	0	0	0	0	1	0	0	0	0	0	1	1	0	0
PTPRG	P23470	Receptor-type tyrosine-protein phosphatase gamma OS=Homo sapiens GN=PTPRG PE=1 SV=4	Receptor-type tyrosine-protein phosphatase gamma	3	3	3	1	3	3	3	2	0	0	1	1	0	0	0	0	0	0	2	0	3	2	3	0	0	1	0	0	0	0	0	1	0	0	0	0	0	0	0	0	0	0	1	1	0	0
PTRF	Q6NZI2	Polymerase I and transcript release factor OS=Homo sapiens GN=PTRF PE=1 SV=1	Polymerase I and transcript release factor	10	10	10	1	10	10	10	10	1	10	9	10	5	8	8	9	9	2	8	7	7	7	8	3	0	0	1	1	0	8	2	3	0	4	1	0	0	2	5	0	8	0	3	3	0	3
PTRH2	Q9Y3E5	Peptidyl-tRNA hydrolase 2, mitochondrial OS=Homo sapiens GN=PTRH2 PE=1 SV=1	Peptidyl-tRNA hydrolase 2, mitochondrial	3	3	3	1	3	3	3	1	0	3	2	2	0	2	2	3	2	0	1	0	0	1	0	0	0	0	0	0	0	0	0	0	1	0	0	0	0	0	0	0	0	0	0	0	0	0
PTX3	P26022	Pentraxin-related protein PTX3 OS=Homo sapiens GN=PTX3 PE=1 SV=3	Pentraxin-related protein PTX3	4	4	4	1	4	4	4	3	0	1	0	0	0	2	0	0	0	0	3	0	3	3	4	1	1	0	2	0	0	3	1	0	0	0	0	0	0	0	0	0	3	0	1	1	0	2
PURA	Q00577	Transcriptional activator protein Pur-alpha OS=Homo sapiens GN=PURA PE=1 SV=2	Transcriptional activator protein Pur-alpha	4	4	4	1	4	4	4	2	2	2	1	2	1	3	1	4	4	1	1	2	1	1	1	2	0	0	0	1	0	2	1	1	0	1	0	0	0	0	1	0	2	1	0	0	0	0
PVR	P15151	Poliovirus receptor OS=Homo sapiens GN=PVR PE=1 SV=2	Poliovirus receptor	5	5	5	1	5	5	5	4	0	4	5	4	3	5	4	4	4	1	5	3	3	3	2	1	1	0	1	1	0	4	0	2	1	2	1	1	0	0	3	0	4	0	3	3	0	2
PVRL2	Q92692	Nectin-2 OS=Homo sapiens GN=PVRL2 PE=1 SV=1	Nectin-2	6	6	6	1	6	6	6	5	0	5	5	5	2	2	1	3	3	0	5	2	4	4	4	1	0	0	1	0	0	3	1	3	0	1	1	1	0	1	1	0	2	0	4	4	0	3
PVRL3	Q9NQS3	Nectin-3 OS=Homo sapiens GN=PVRL3 PE=1 SV=1	Nectin-3	2	2	2	1	2	2	2	1	0	1	1	1	0	1	0	0	1	0	1	1	1	1	1	0	0	0	0	0	0	1	0	0	0	0	0	0	0	0	0	0	1	0	1	1	0	0
PWP1	Q13610	Periodic tryptophan protein 1 homolog OS=Homo sapiens GN=PWP1 PE=1 SV=1	Periodic tryptophan protein 1 homolog	5	5	5	1	5	5	5	2	0	3	3	4	0	4	2	5	5	1	2	2	1	2	2	1	0	0	1	0	0	1	1	0	1	0	1	1	0	1	2	0	1	0	1	1	0	1
PWP2	Q15269	Periodic tryptophan protein 2 homolog OS=Homo sapiens GN=PWP2 PE=1 SV=2	Periodic tryptophan protein 2 homolog	2	2	2	1	2	2	2	0	0	0	0	0	0	0	0	2	2	0	0	0	0	0	0	0	0	0	0	0	0	0	0	0	0	0	0	0	0	0	1	0	0	0	0	0	0	0
PXDN	Q92626	Peroxidasin homolog OS=Homo sapiens GN=PXDN PE=1 SV=2	Peroxidasin homolog	24	24	24	1	24	24	24	10	0	1	1	3	2	8	6	15	7	0	8	0	3	4	3	11	0	1	17	7	1	18	2	1	1	1	0	0	1	1	0	0	18	0	2	3	1	7
PYGB	P11216	Glycogen phosphorylase, brain form OS=Homo sapiens GN=PYGB PE=1 SV=5	Glycogen phosphorylase, brain form	8;3	8;3	6;1	2	8	8	6	5	0	5	4	4	1	4	3	5	4	1	5	2	4	3	2	2	0	0	2	0	0	2	1	1	0	1	0	0	0	1	2	0	3	0	3	3	0	2
PYGL	P06737	Glycogen phosphorylase, liver form OS=Homo sapiens GN=PYGL PE=1 SV=4	Glycogen phosphorylase, liver form	5	3	3	1	5	3	3	5	0	5	4	4	0	4	5	3	3	1	3	3	5	2	3	3	0	0	2	0	0	3	1	0	0	1	1	0	0	0	2	0	2	0	2	1	0	1
QARS	P47897	Glutamine--tRNA ligase OS=Homo sapiens GN=QARS PE=1 SV=1	Glutamine--tRNA ligase	12	12	12	1	12	12	12	5	0	7	6	7	0	5	4	11	9	1	2	2	3	5	3	1	0	0	0	0	0	1	0	2	1	1	1	0	1	1	1	0	1	0	2	1	1	0
QSOX1	O00391	Sulfhydryl oxidase 1 OS=Homo sapiens GN=QSOX1 PE=1 SV=3	Sulfhydryl oxidase 1	5	5	5	1	5	5	5	4	1	5	4	5	1	4	5	5	5	3	4	3	2	3	3	1	0	0	2	1	0	4	2	2	0	1	1	0	0	0	1	0	4	0	1	0	0	1
RAB10	P61026	Ras-related protein Rab-10 OS=Homo sapiens GN=RAB10 PE=1 SV=1	Ras-related protein Rab-10	10	8	8	1	10	8	8	10	3	9	8	9	5	8	7	9	6	3	9	4	8	6	7	5	2	2	6	3	1	9	1	6	4	6	3	2	1	1	3	0	9	0	7	3	1	4
RAB11B	Q15907	Ras-related protein Rab-11B OS=Homo sapiens GN=RAB11B PE=1 SV=4;Ras-related protein Rab-11A OS=Homo sapiens GN=RAB11A PE=1 SV=3	Ras-related protein Rab-11B;Ras-related protein Rab-11A	13;11;1	13;11;1	13;11;1	3	13	13	13	13	5	13	12	12	9	13	13	12	11	6	13	7	10	10	9	9	6	7	5	3	0	13	5	9	8	10	7	6	4	7	10	2	11	1	10	11	4	11
RAB11FIP1	Q6WKZ4	Rab11 family-interacting protein 1 OS=Homo sapiens GN=RAB11FIP1 PE=1 SV=3;Rab11 family-interacting protein 2 OS=Homo sapiens GN=RAB11FIP2 PE=1 SV=1	Rab11 family-interacting protein 1;Rab11 family-interacting protein 2	2;1	2;1	2;1	2	2	2	2	1	0	2	2	1	1	1	1	1	2	0	1	1	1	2	1	0	0	0	0	0	0	0	0	0	0	0	1	0	0	0	0	0	0	0	0	0	0	0
RAB11FIP5	Q9BXF6	Rab11 family-interacting protein 5 OS=Homo sapiens GN=RAB11FIP5 PE=1 SV=1	Rab11 family-interacting protein 5	2	2	2	1	2	2	2	1	0	1	1	1	0	0	0	1	1	0	1	0	0	0	0	0	0	0	0	0	0	1	0	0	1	0	0	0	0	0	0	0	0	1	1	1	0	1
RAB13	P51153	Ras-related protein Rab-13 OS=Homo sapiens GN=RAB13 PE=1 SV=1	Ras-related protein Rab-13	10	8	7	1	10	8	7	10	2	9	8	10	5	6	6	8	6	3	8	6	8	9	8	8	1	2	5	2	1	10	2	6	2	4	2	1	1	1	4	0	8	0	6	4	1	4
RAB14	P61106	Ras-related protein Rab-14 OS=Homo sapiens GN=RAB14 PE=1 SV=4	Ras-related protein Rab-14	13	13	13	1	13	13	13	10	0	11	11	11	4	11	11	11	10	3	10	9	10	10	7	5	1	0	5	2	0	7	3	4	3	5	2	1	0	1	4	1	6	0	10	7	0	5
RAB18	Q9NP72	Ras-related protein Rab-18 OS=Homo sapiens GN=RAB18 PE=1 SV=1	Ras-related protein Rab-18	9	9	9	1	9	9	9	6	0	7	6	6	3	6	6	6	7	1	7	4	7	7	6	3	0	0	1	0	0	5	2	4	4	3	3	0	0	1	3	0	3	0	8	7	0	4
RAB1A	P62820	Ras-related protein Rab-1A OS=Homo sapiens GN=RAB1A PE=1 SV=3	Ras-related protein Rab-1A	12	5	5	1	12	5	5	10	4	11	11	11	8	9	9	11	10	7	10	10	9	9	9	9	3	2	6	3	2	9	6	8	8	7	5	3	3	5	7	2	9	0	10	10	2	7
RAB1B	Q9H0U4	Ras-related protein Rab-1B OS=Homo sapiens GN=RAB1B PE=1 SV=1	Ras-related protein Rab-1B	12;5	12;5	5;2	2	12	12	5	11	4	11	10	10	8	9	11	11	9	7	11	8	10	8	9	10	4	2	6	3	2	10	7	9	8	8	6	3	2	5	8	4	8	0	10	11	3	7
RAB21	Q9UL25	Ras-related protein Rab-21 OS=Homo sapiens GN=RAB21 PE=1 SV=3	Ras-related protein Rab-21	3	3	3	1	3	3	3	3	0	3	2	3	1	2	2	2	1	0	3	1	2	3	2	0	0	0	0	0	0	2	0	1	0	1	0	0	0	0	2	0	1	0	2	2	0	2
RAB22A	Q9UL26	Ras-related protein Rab-22A OS=Homo sapiens GN=RAB22A PE=1 SV=2	Ras-related protein Rab-22A	4	4	3	1	4	4	3	3	0	2	3	3	0	3	1	3	3	0	3	1	4	4	3	1	0	0	0	0	0	3	0	1	0	2	0	1	0	0	0	0	1	0	2	1	0	0
RAB23	Q9ULC3	Ras-related protein Rab-23 OS=Homo sapiens GN=RAB23 PE=1 SV=1	Ras-related protein Rab-23	7	7	7	1	7	7	7	7	1	7	6	7	2	6	5	6	6	1	6	4	5	7	7	4	1	0	2	1	0	6	1	3	1	3	0	1	0	0	1	0	5	1	4	1	0	1
RAB27B	O00194	Ras-related protein Rab-27B OS=Homo sapiens GN=RAB27B PE=1 SV=4	Ras-related protein Rab-27B	2	2	1	1	2	2	1	1	0	1	1	2	0	1	1	0	0	0	1	1	2	1	1	0	0	0	0	0	0	1	0	0	0	0	0	0	0	0	0	0	0	0	0	0	0	0
RAB2A	P61019	Ras-related protein Rab-2A OS=Homo sapiens GN=RAB2A PE=1 SV=1	Ras-related protein Rab-2A	12	12	7	1	12	12	7	12	2	12	12	12	9	12	10	11	9	3	12	8	10	10	8	4	0	0	5	2	0	8	1	6	3	4	4	2	1	2	8	0	7	0	9	8	1	4
RAB31	Q13636	Ras-related protein Rab-31 OS=Homo sapiens GN=RAB31 PE=1 SV=1	Ras-related protein Rab-31	4	3	3	1	4	3	3	3	0	2	2	2	0	1	0	1	0	0	2	0	1	2	2	0	0	0	0	0	0	2	0	0	0	0	0	0	0	0	0	0	0	0	2	0	0	0
RAB32	Q13637	Ras-related protein Rab-32 OS=Homo sapiens GN=RAB32 PE=1 SV=3	Ras-related protein Rab-32	8;2	8;2	7;1	2	8	8	7	8	1	6	7	7	4	7	7	6	6	1	8	5	7	7	7	2	0	0	4	1	0	7	1	4	1	3	0	0	0	0	3	0	4	0	6	3	0	3
RAB34	Q9BZG1	Ras-related protein Rab-34 OS=Homo sapiens GN=RAB34 PE=1 SV=1	Ras-related protein Rab-34	6	6	6	1	6	6	6	6	0	6	5	4	3	5	4	4	5	1	6	0	6	5	5	2	0	0	2	0	0	6	0	3	1	3	1	1	1	0	2	0	3	0	2	3	0	2
RAB35	Q15286	Ras-related protein Rab-35 OS=Homo sapiens GN=RAB35 PE=1 SV=1	Ras-related protein Rab-35	7	7	7	1	7	7	7	6	0	6	6	6	5	5	4	6	6	2	6	4	6	6	5	3	0	0	2	0	0	5	2	7	3	4	1	0	0	0	3	0	5	0	6	6	0	1
RAB3B	P20337	Ras-related protein Rab-3B OS=Homo sapiens GN=RAB3B PE=1 SV=2	Ras-related protein Rab-3B	4	3	3	1	4	3	3	4	1	4	4	4	3	4	4	3	4	2	4	3	4	4	4	3	0	0	2	1	0	4	2	1	1	2	0	0	0	1	2	0	4	0	3	2	0	2
RAB3D	O95716	Ras-related protein Rab-3D OS=Homo sapiens GN=RAB3D PE=1 SV=1	Ras-related protein Rab-3D	5	3	2	1	5	3	2	5	1	5	5	5	2	5	1	3	3	2	5	3	5	5	5	2	0	0	1	1	0	3	1	3	0	2	0	0	0	0	2	0	3	0	4	1	0	1
RAB43	Q86YS6	Ras-related protein Rab-43 OS=Homo sapiens GN=RAB43 PE=1 SV=1	Ras-related protein Rab-43	3	3	3	1	3	3	3	2	0	0	0	0	0	0	0	0	0	0	1	0	1	1	1	1	0	0	0	0	0	0	0	0	0	0	0	0	0	0	0	0	0	0	2	1	0	0
RAB4A	P20338	Ras-related protein Rab-4A OS=Homo sapiens GN=RAB4A PE=1 SV=3;Ras-related protein Rab-4B OS=Homo sapiens GN=RAB4B PE=1 SV=1	Ras-related protein Rab-4A;Ras-related protein Rab-4B	2;1	2;1	2;1	2	2	2	2	2	0	2	2	1	1	2	2	2	2	0	2	0	2	1	2	0	0	0	0	0	0	1	0	1	0	0	0	0	0	0	0	0	0	0	0	0	0	0
RAB5A	P20339	Ras-related protein Rab-5A OS=Homo sapiens GN=RAB5A PE=1 SV=2	Ras-related protein Rab-5A	7	4	4	1	7	4	4	6	2	6	6	6	3	5	6	6	5	4	5	7	6	6	6	6	3	1	3	0	0	7	4	4	1	1	1	1	2	1	3	2	7	1	3	4	1	3
RAB5B	P61020	Ras-related protein Rab-5B OS=Homo sapiens GN=RAB5B PE=1 SV=1	Ras-related protein Rab-5B	8	5	5	1	8	5	5	8	1	8	6	7	4	6	8	8	6	3	6	6	8	8	6	7	1	1	2	1	0	8	3	3	3	3	1	1	1	1	5	1	7	1	6	6	1	5
RAB5C	P51148	Ras-related protein Rab-5C OS=Homo sapiens GN=RAB5C PE=1 SV=2	Ras-related protein Rab-5C	9	9	6	1	9	9	6	8	2	8	8	9	6	8	8	8	7	3	6	6	8	6	6	7	3	2	2	0	0	8	4	5	5	4	4	3	4	4	6	1	8	2	6	6	0	4
RAB6A	P20340	Ras-related protein Rab-6A OS=Homo sapiens GN=RAB6A PE=1 SV=3	Ras-related protein Rab-6A	10;1	10;1	5;0	2	10	10	5	8	1	10	8	9	6	10	7	10	10	6	7	8	9	8	6	5	2	0	4	1	0	9	2	6	5	7	6	3	2	6	5	1	8	1	6	6	2	4
RAB6B	Q9NRW1	Ras-related protein Rab-6B OS=Homo sapiens GN=RAB6B PE=1 SV=1	Ras-related protein Rab-6B	7	2	2	1	7	2	2	4	1	7	6	7	3	7	6	7	7	3	4	5	5	4	5	3	1	0	3	1	0	5	0	3	5	3	5	4	1	5	4	1	5	1	3	4	1	3
RAB7A	P51149	Ras-related protein Rab-7a OS=Homo sapiens GN=RAB7A PE=1 SV=1	Ras-related protein Rab-7a	14	14	14	1	14	14	14	14	2	14	14	13	9	13	11	13	13	4	14	5	11	11	10	4	2	1	5	3	0	10	4	8	7	7	2	2	1	5	6	0	9	0	11	8	2	8
RAB8A	P61006	Ras-related protein Rab-8A OS=Homo sapiens GN=RAB8A PE=1 SV=1	Ras-related protein Rab-8A	10	8	5	1	10	8	5	10	2	10	10	10	7	9	10	10	9	4	10	9	9	10	9	9	2	2	6	3	1	10	3	7	3	7	3	2	2	2	8	1	8	0	9	7	1	7
RAB8B	Q92930	Ras-related protein Rab-8B OS=Homo sapiens GN=RAB8B PE=1 SV=2	Ras-related protein Rab-8B	9;1;1	4;0;0	4;0;0	3	9	4	4	9	2	9	9	9	6	8	8	7	7	3	9	6	8	9	9	6	2	2	5	3	1	8	3	4	4	5	3	2	2	3	4	1	7	0	8	5	1	4
RAB9A	P51151	Ras-related protein Rab-9A OS=Homo sapiens GN=RAB9A PE=1 SV=1;Ras-related protein Rab-9B OS=Homo sapiens GN=RAB9B PE=1 SV=1	Ras-related protein Rab-9A;Ras-related protein Rab-9B	2;1	2;1	2;1	2	2	2	2	1	0	1	1	1	0	1	1	2	2	0	1	0	1	2	2	1	0	0	1	0	0	1	0	1	1	0	1	0	0	0	2	0	1	0	2	2	0	1
RABGGTA	Q92696	Geranylgeranyl transferase type-2 subunit alpha OS=Homo sapiens GN=RABGGTA PE=1 SV=2	Geranylgeranyl transferase type-2 subunit alpha	5	5	5	1	5	5	5	3	0	3	3	3	0	3	2	3	3	0	3	1	3	3	0	0	1	1	1	0	0	0	0	1	2	0	1	0	0	0	1	0	0	0	1	1	0	1
RABGGTB	P53611	Geranylgeranyl transferase type-2 subunit beta OS=Homo sapiens GN=RABGGTB PE=1 SV=2	Geranylgeranyl transferase type-2 subunit beta	2	2	2	1	2	2	2	1	0	2	1	2	1	1	1	0	0	0	1	0	0	0	0	0	0	0	0	0	0	0	0	0	0	1	0	0	0	0	0	0	0	0	0	0	0	0
RAC1	P63000	Ras-related C3 botulinum toxin substrate 1 OS=Homo sapiens GN=RAC1 PE=1 SV=1;Ras-related C3 botulinum toxin substrate 3 OS=Homo sapiens GN=RAC3 PE=1 SV=1	Ras-related C3 botulinum toxin substrate 1;Ras-related C3 botulinum toxin substrate 3	8;4	7;3	4;1	2	8	7	4	8	0	8	8	6	3	5	3	4	4	0	8	2	5	6	4	3	0	0	4	1	0	4	1	4	3	4	0	0	1	1	2	0	5	0	7	4	1	3
RAC2	P15153	Ras-related C3 botulinum toxin substrate 2 OS=Homo sapiens GN=RAC2 PE=1 SV=1	Ras-related C3 botulinum toxin substrate 2	6	2	2	1	6	2	2	6	0	5	5	6	3	4	4	4	4	0	6	1	5	5	4	2	0	0	4	1	0	4	1	4	3	4	0	0	1	0	1	0	4	0	4	4	0	1
RAD23B	P54727	UV excision repair protein RAD23 homolog B OS=Homo sapiens GN=RAD23B PE=1 SV=1	UV excision repair protein RAD23 homolog B	7;2	7;2	7;2	2	7	7	7	5	0	4	4	5	3	4	3	2	2	0	3	3	4	5	3	1	0	1	0	0	0	3	0	3	2	1	1	0	0	0	1	0	2	0	3	4	0	1
RAD50	Q92878	DNA repair protein RAD50 OS=Homo sapiens GN=RAD50 PE=1 SV=1	DNA repair protein RAD50	7	7	7	1	7	7	7	0	0	1	0	1	0	1	1	6	5	0	0	0	0	0	0	0	0	0	0	0	0	0	0	1	0	0	0	0	0	0	2	0	0	0	0	0	0	0
RALA	P11233	Ras-related protein Ral-A OS=Homo sapiens GN=RALA PE=1 SV=1	Ras-related protein Ral-A	9	4	4	1	9	4	4	9	1	9	9	9	6	8	6	5	6	3	8	6	6	7	6	4	0	1	3	1	0	7	0	5	5	3	2	1	0	5	5	1	6	0	8	6	2	4
RALB	P11234	Ras-related protein Ral-B OS=Homo sapiens GN=RALB PE=1 SV=1	Ras-related protein Ral-B	11	11	6	1	11	11	6	11	0	9	11	11	6	8	6	8	7	2	10	6	8	9	8	4	0	1	2	0	0	10	0	4	4	3	2	0	0	2	5	0	8	0	9	9	0	6
RALY	Q9UKM9	RNA-binding protein Raly OS=Homo sapiens GN=RALY PE=1 SV=1	RNA-binding protein Raly	5	5	5	1	5	5	5	1	0	3	1	3	0	1	1	5	4	0	0	1	0	0	0	0	0	0	0	0	0	0	0	0	0	0	0	0	0	0	0	0	0	0	0	0	0	0
RAN	P62826	GTP-binding nuclear protein Ran OS=Homo sapiens GN=RAN PE=1 SV=3	GTP-binding nuclear protein Ran	9	9	9	1	9	9	9	7	1	8	6	9	5	7	6	9	8	2	7	7	6	7	4	3	1	1	5	2	0	3	1	5	4	5	2	2	1	2	4	2	2	1	5	3	1	3
RANBP1	P43487	Ran-specific GTPase-activating protein OS=Homo sapiens GN=RANBP1 PE=1 SV=1	Ran-specific GTPase-activating protein	4	4	4	1	4	4	4	3	0	4	4	4	1	4	3	4	4	1	3	4	3	3	3	0	0	0	1	0	0	3	0	1	1	1	0	0	1	1	1	0	2	0	1	1	0	0
RANBP2	P49792	E3 SUMO-protein ligase RanBP2 OS=Homo sapiens GN=RANBP2 PE=1 SV=2;RanBP2-like and GRIP domain-containing protein 4 OS=Homo sapiens GN=RGPD4 PE=2 SV=3;RanBP2-like and GRIP domain-containing protein 3 OS=Homo sapiens GN=RGPD3 PE=2 SV=2;RANBP2-like and GRIP d	E3 SUMO-protein ligase RanBP2;RanBP2-like and GRIP domain-containing protein 4;RanBP2-like and GRIP domain-containing protein 3;RANBP2-like and GRIP domain-containing protein 5/6;RANBP2-like and GRIP domain-containing protein 8	2;1;1;1;1	2;1;1;1;1	2;1;1;1;1	5	2	2	2	1	0	0	0	0	0	0	0	2	1	0	0	0	0	0	0	0	0	0	0	0	0	0	0	0	0	0	1	0	0	0	0	0	0	0	0	0	0	0
RANBP9	Q96S59	Ran-binding protein 9 OS=Homo sapiens GN=RANBP9 PE=1 SV=1	Ran-binding protein 9	2	2	2	1	2	2	2	0	0	0	0	0	1	0	0	2	1	0	0	0	0	0	0	0	0	0	0	0	0	0	0	0	0	0	0	1	0	0	0	0	0	0	0	0	0	0
RANGAP1	P46060	Ran GTPase-activating protein 1 OS=Homo sapiens GN=RANGAP1 PE=1 SV=1	Ran GTPase-activating protein 1	5	5	5	1	5	5	5	2	0	2	2	2	1	2	1	3	1	0	2	2	2	2	2	1	0	0	0	0	0	1	0	1	1	2	0	0	0	0	2	0	0	0	4	2	0	0
RAP1B	P61224	Ras-related protein Rap-1b OS=Homo sapiens GN=RAP1B PE=1 SV=1;Ras-related protein Rap-1b-like protein OS=Homo sapiens PE=2 SV=1	Ras-related protein Rap-1b;Ras-related protein Rap-1b-like protein	12;9	12;9	4;3	2	12	12	4	11	1	11	10	11	6	10	8	11	8	3	11	5	11	10	10	6	2	1	3	3	0	8	2	7	5	8	3	2	0	3	4	1	9	1	9	7	1	6
RAP2A	P10114	Ras-related protein Rap-2a OS=Homo sapiens GN=RAP2A PE=1 SV=1	Ras-related protein Rap-2a	7	3	2	1	7	3	2	7	0	5	6	6	2	3	1	3	4	0	7	1	5	6	5	4	0	1	3	1	0	6	1	3	0	1	2	0	0	0	2	0	5	0	4	5	1	4
RAP2B	P61225	Ras-related protein Rap-2b OS=Homo sapiens GN=RAP2B PE=1 SV=1	Ras-related protein Rap-2b	8	8	4	1	8	8	4	8	0	4	6	7	3	4	3	5	5	0	8	1	5	6	5	6	0	1	3	1	0	7	1	5	1	1	3	0	0	1	3	0	5	0	5	7	1	6
RARS	P54136	Arginine--tRNA ligase, cytoplasmic OS=Homo sapiens GN=RARS PE=1 SV=2	Arginine--tRNA ligase, cytoplasmic	16	16	16	1	16	16	16	11	0	9	9	12	2	11	12	16	14	1	11	5	9	9	6	1	0	0	2	1	0	1	0	7	0	3	0	0	0	0	4	0	1	0	2	3	1	1
RASA3	Q14644	Ras GTPase-activating protein 3 OS=Homo sapiens GN=RASA3 PE=1 SV=3	Ras GTPase-activating protein 3	5	5	5	1	5	5	5	5	0	1	3	2	0	0	0	0	0	0	5	0	4	2	3	1	0	0	0	0	0	3	0	0	0	0	0	0	0	0	1	0	1	0	1	1	0	1
RBBP4	Q09028	Histone-binding protein RBBP4 OS=Homo sapiens GN=RBBP4 PE=1 SV=3;Histone-binding protein RBBP7 OS=Homo sapiens GN=RBBP7 PE=1 SV=1	Histone-binding protein RBBP4;Histone-binding protein RBBP7	4;3	4;3	4;3	2	4	4	4	4	0	4	3	3	2	3	2	4	3	0	2	3	3	0	0	1	0	0	0	0	0	0	0	1	0	1	1	0	0	0	3	0	0	0	1	1	0	1
RBFOX2	O43251	RNA binding protein fox-1 homolog 2 OS=Homo sapiens GN=RBFOX2 PE=1 SV=3;RNA binding protein fox-1 homolog 1 OS=Homo sapiens GN=RBFOX1 PE=1 SV=2	RNA binding protein fox-1 homolog 2;RNA binding protein fox-1 homolog 1	2;1	2;1	2;1	2	2	2	2	1	0	2	0	2	0	0	0	1	1	1	1	2	1	0	1	0	0	0	0	0	0	0	1	0	0	0	0	0	0	0	0	0	0	0	0	0	0	0
RBM25	P49756	RNA-binding protein 25 OS=Homo sapiens GN=RBM25 PE=1 SV=3	RNA-binding protein 25	3	3	3	1	3	3	3	0	0	1	0	1	0	1	1	3	2	0	0	0	0	0	0	0	0	0	0	0	0	0	0	0	0	0	0	0	0	0	0	0	0	0	0	0	0	0
RBM39	Q14498	RNA-binding protein 39 OS=Homo sapiens GN=RBM39 PE=1 SV=2	RNA-binding protein 39	5	5	5	1	5	5	5	0	0	2	1	1	0	1	2	5	5	0	0	0	1	0	0	0	0	0	0	0	0	0	0	0	0	0	0	1	0	0	2	0	0	0	0	0	0	0
RBM4	Q9BWF3	RNA-binding protein 4 OS=Homo sapiens GN=RBM4 PE=1 SV=1;RNA-binding protein 4B OS=Homo sapiens GN=RBM4B PE=1 SV=1	RNA-binding protein 4;RNA-binding protein 4B	7;5	7;5	7;5	2	7	7	7	1	1	4	3	5	0	5	4	6	6	0	1	2	0	1	1	1	0	0	0	0	0	1	0	3	0	2	1	0	0	1	4	1	0	0	0	0	0	0
RBMX	P38159	RNA-binding motif protein, X chromosome OS=Homo sapiens GN=RBMX PE=1 SV=3	RNA-binding motif protein, X chromosome;RNA-binding motif protein, X chromosome, N-terminally processed	5;2;2;1	5;2;2;1	5;2;2;1	4	5	5	5	0	0	4	3	4	1	2	3	5	4	0	0	2	0	0	0	0	0	0	0	0	0	0	0	2	1	0	0	0	0	0	2	0	0	0	0	0	0	1
RCN1	Q15293	Reticulocalbin-1 OS=Homo sapiens GN=RCN1 PE=1 SV=1	Reticulocalbin-1	7	7	7	1	7	7	7	6	0	6	6	6	4	6	6	5	6	3	6	5	6	6	6	4	0	0	2	1	0	6	1	4	1	4	0	1	0	0	2	0	6	0	6	6	0	3
RCN2	Q14257	Reticulocalbin-2 OS=Homo sapiens GN=RCN2 PE=1 SV=1	Reticulocalbin-2	3	3	3	1	3	3	3	2	0	2	1	3	0	3	3	3	3	1	2	2	1	1	1	0	0	0	0	0	1	3	0	0	0	0	0	0	0	0	0	0	2	0	0	2	0	0
RDX	P35241	Radixin OS=Homo sapiens GN=RDX PE=1 SV=1	Radixin	39	24	24	1	39	24	24	27	7	35	30	32	22	27	26	21	24	5	28	19	17	20	17	15	4	5	7	2	2	22	3	28	10	16	7	3	2	3	8	2	19	1	20	19	3	9
RECK	O95980	Reversion-inducing cysteine-rich protein with Kazal motifs OS=Homo sapiens GN=RECK PE=1 SV=1	Reversion-inducing cysteine-rich protein with Kazal motifs	2	2	2	1	2	2	2	1	0	2	2	2	0	2	1	2	1	0	1	0	1	2	2	1	0	0	1	0	0	2	1	0	0	0	0	0	0	0	1	0	2	0	1	1	0	1
RECQL	P46063	ATP-dependent DNA helicase Q1 OS=Homo sapiens GN=RECQL PE=1 SV=3	ATP-dependent DNA helicase Q1	4	4	4	1	4	4	4	0	0	3	3	2	0	0	0	4	3	0	0	0	0	0	0	0	0	0	0	0	0	0	0	1	0	1	0	0	0	0	1	0	0	0	0	0	0	0
RELN	P78509	Reelin OS=Homo sapiens GN=RELN PE=1 SV=3	Reelin	13	13	13	1	13	13	13	0	0	0	0	0	0	0	0	0	0	0	0	0	0	0	2	6	1	0	8	2	0	4	0	0	0	0	0	0	0	0	0	0	7	0	0	1	0	6
REXO2	Q9Y3B8	Oligoribonuclease, mitochondrial OS=Homo sapiens GN=REXO2 PE=1 SV=3	Oligoribonuclease, mitochondrial	2	2	2	1	2	2	2	2	0	2	2	2	1	2	2	2	1	1	2	2	2	2	1	2	0	0	0	0	0	2	1	1	0	1	0	0	0	0	0	0	2	0	1	1	0	1
RFTN1	Q14699	Raftlin OS=Homo sapiens GN=RFTN1 PE=1 SV=4	Raftlin	9	9	9	1	9	9	9	9	0	5	6	5	2	2	1	6	1	0	9	0	7	8	7	2	0	0	2	0	0	7	0	3	0	1	0	0	0	0	0	0	6	0	5	5	0	3
RGS20	O76081	Regulator of G-protein signaling 20 OS=Homo sapiens GN=RGS20 PE=1 SV=4	Regulator of G-protein signaling 20	2	2	2	1	2	2	2	2	0	2	2	2	0	1	0	1	1	0	2	0	2	2	2	0	0	0	0	0	0	1	0	0	0	0	0	0	0	0	0	0	2	0	1	1	0	0
RHEB	Q15382	GTP-binding protein Rheb OS=Homo sapiens GN=RHEB PE=1 SV=1	GTP-binding protein Rheb	9	9	9	1	9	9	9	7	0	7	7	8	3	8	8	8	8	2	6	5	7	6	5	0	1	0	0	0	0	5	0	4	4	4	2	0	1	3	4	0	3	0	5	5	0	2
RHOA	P61586	Transforming protein RhoA OS=Homo sapiens GN=RHOA PE=1 SV=1	Transforming protein RhoA	8	8	3	1	8	8	3	8	1	7	7	7	3	4	6	7	6	0	8	5	7	7	5	3	1	1	4	1	0	7	1	4	3	5	1	1	0	1	2	0	6	1	6	5	0	2
RHOB	P62745	Rho-related GTP-binding protein RhoB OS=Homo sapiens GN=RHOB PE=1 SV=1	Rho-related GTP-binding protein RhoB	4	2	2	1	4	2	2	4	0	4	4	4	1	3	3	4	3	0	3	2	3	4	3	1	0	0	2	0	1	3	0	1	1	1	0	0	0	0	1	0	2	0	3	2	0	1
RHOC	P08134	Rho-related GTP-binding protein RhoC OS=Homo sapiens GN=RHOC PE=1 SV=1	Rho-related GTP-binding protein RhoC	7	2	2	1	7	2	2	7	1	6	6	6	3	4	4	6	5	0	7	4	5	5	4	2	1	1	4	0	0	6	1	4	2	5	1	1	0	1	2	0	5	1	5	4	0	3
RHOG	P84095	Rho-related GTP-binding protein RhoG OS=Homo sapiens GN=RHOG PE=1 SV=1	Rho-related GTP-binding protein RhoG	9	9	8	1	9	9	8	9	0	8	9	9	3	6	3	5	4	0	9	2	8	6	7	2	0	1	3	0	0	4	0	6	2	4	0	1	0	1	2	0	3	0	5	4	1	2
RMDN1	Q96DB5	Regulator of microtubule dynamics protein 1 OS=Homo sapiens GN=RMDN1 PE=1 SV=1	Regulator of microtubule dynamics protein 1	2	2	2	1	2	2	2	1	0	2	2	2	1	2	0	1	0	0	0	0	0	1	0	0	0	0	0	0	0	0	0	1	2	1	0	0	0	0	0	0	0	0	0	0	0	0
RNASE7	Q9H1E1	Ribonuclease 7 OS=Homo sapiens GN=RNASE7 PE=1 SV=2	Ribonuclease 7	2	2	2	1	2	2	2	1	0	1	1	1	0	1	1	1	1	0	1	1	1	1	1	1	0	0	0	0	0	1	0	0	0	0	0	0	0	0	0	0	1	0	2	1	0	1
RND3	P61587	Rho-related GTP-binding protein RhoE OS=Homo sapiens GN=RND3 PE=1 SV=1	Rho-related GTP-binding protein RhoE	4	4	4	1	4	4	4	4	0	0	0	1	0	0	0	1	0	0	4	0	3	3	2	1	0	0	1	0	0	1	1	0	0	0	0	0	0	0	0	0	1	0	2	1	0	1
RNH1	P13489	Ribonuclease inhibitor OS=Homo sapiens GN=RNH1 PE=1 SV=2	Ribonuclease inhibitor	11	11	11	1	11	11	11	8	0	7	7	7	1	6	3	9	7	2	9	4	8	7	6	3	0	0	2	0	0	7	1	5	4	4	2	0	1	2	5	0	5	1	8	5	1	4
RNPEP	Q9H4A4	Aminopeptidase B OS=Homo sapiens GN=RNPEP PE=1 SV=2	Aminopeptidase B	2	2	2	1	2	2	2	2	0	2	2	2	0	1	0	1	0	0	1	0	2	2	0	1	0	0	0	0	0	0	0	0	0	0	0	0	0	1	1	0	0	0	0	0	0	1
ROCK2	O75116	Rho-associated protein kinase 2 OS=Homo sapiens GN=ROCK2 PE=1 SV=4	Rho-associated protein kinase 2	2	2	2	1	2	2	2	1	0	0	1	0	0	0	0	0	0	0	0	0	0	0	0	0	0	1	0	0	0	0	0	0	0	0	0	0	0	0	2	0	0	0	1	1	0	1
RP2	O75695	Protein XRP2 OS=Homo sapiens GN=RP2 PE=1 SV=4	Protein XRP2	8	8	8	1	8	8	8	6	0	7	5	5	2	5	3	4	4	0	6	1	6	7	5	1	0	0	0	0	0	5	0	2	0	2	0	0	0	0	2	0	5	0	5	5	0	3
RPA1	P27694	Replication protein A 70 kDa DNA-binding subunit OS=Homo sapiens GN=RPA1 PE=1 SV=2	Replication protein A 70 kDa DNA-binding subunit;Replication protein A 70 kDa DNA-binding subunit, N-terminally processed	5	5	5	1	5	5	5	1	0	4	2	3	0	4	3	5	5	0	0	2	0	0	0	0	0	0	0	0	0	0	0	1	0	0	0	0	0	0	0	0	0	0	0	0	0	0
RPA3	P35244	Replication protein A 14 kDa subunit OS=Homo sapiens GN=RPA3 PE=1 SV=1	Replication protein A 14 kDa subunit	3	3	3	1	3	3	3	0	0	2	2	1	1	3	2	2	3	0	0	1	0	0	0	0	0	0	0	0	0	0	0	1	1	0	0	0	0	0	1	0	0	0	0	0	0	0
RPF2	Q9H7B2	Ribosome production factor 2 homolog OS=Homo sapiens GN=RPF2 PE=1 SV=2	Ribosome production factor 2 homolog	2	2	2	1	2	2	2	0	0	0	0	0	0	0	0	2	2	0	0	0	0	0	0	0	0	0	0	0	0	0	0	0	0	0	1	0	0	0	0	0	0	0	0	0	0	0
RPL10	P27635	60S ribosomal protein L10 OS=Homo sapiens GN=RPL10 PE=1 SV=4	60S ribosomal protein L10	6;1	6;1	6;1	2	6	6	6	3	0	2	1	3	0	2	4	6	4	0	1	1	0	0	0	0	0	0	0	0	0	0	0	0	0	0	0	0	0	1	3	0	0	0	0	0	0	0
RPL10A	P62906	60S ribosomal protein L10a OS=Homo sapiens GN=RPL10A PE=1 SV=2	60S ribosomal protein L10a	8	8	8	1	8	8	8	6	0	8	6	6	1	5	4	7	6	1	5	3	3	5	1	0	0	0	0	1	0	1	1	2	0	1	0	0	0	1	2	0	1	0	2	2	0	2
RPL11	P62913	60S ribosomal protein L11 OS=Homo sapiens GN=RPL11 PE=1 SV=2	60S ribosomal protein L11	4	4	4	1	4	4	4	4	1	4	4	4	1	3	3	4	4	1	4	1	2	3	3	2	0	0	3	0	0	2	2	2	1	2	1	1	0	2	3	2	3	0	2	0	1	1
RPL12	P30050	60S ribosomal protein L12 OS=Homo sapiens GN=RPL12 PE=1 SV=1	60S ribosomal protein L12	5	5	5	1	5	5	5	5	0	5	5	5	2	5	5	5	5	4	5	5	5	5	4	3	1	0	1	0	0	4	0	2	2	3	0	2	1	2	3	0	3	1	5	5	0	3
RPL13	P26373	60S ribosomal protein L13 OS=Homo sapiens GN=RPL13 PE=1 SV=4	60S ribosomal protein L13	7	7	7	1	7	7	7	3	0	3	4	5	3	4	4	6	6	3	2	5	4	2	2	1	0	0	1	0	0	2	1	2	0	1	1	0	0	3	3	0	1	0	1	0	0	0
RPL13A	P40429	60S ribosomal protein L13a OS=Homo sapiens GN=RPL13A PE=1 SV=2;Putative 60S ribosomal protein L13a protein RPL13AP3 OS=Homo sapiens GN=RPL13AP3 PE=5 SV=1	60S ribosomal protein L13a;Putative 60S ribosomal protein L13a protein RPL13AP3	8;4	8;4	8;4	2	8	8	8	3	0	2	3	2	1	4	7	8	7	3	2	3	2	3	2	0	0	0	2	0	0	1	1	2	1	1	2	1	0	2	2	1	2	0	2	1	1	1
RPL14	P50914	60S ribosomal protein L14 OS=Homo sapiens GN=RPL14 PE=1 SV=4	60S ribosomal protein L14	6	6	6	1	6	6	6	2	1	6	4	6	2	5	5	6	6	2	5	5	4	3	2	1	0	1	2	0	0	3	1	1	2	0	2	2	2	5	5	1	2	0	2	1	0	2
RPL15	P61313	60S ribosomal protein L15 OS=Homo sapiens GN=RPL15 PE=1 SV=2	60S ribosomal protein L15	9	9	9	1	9	9	9	4	1	3	3	4	1	5	4	9	9	2	4	3	2	2	2	1	0	0	1	1	0	1	0	2	0	1	1	1	1	4	3	0	2	0	1	3	0	2
RPL17	P18621	60S ribosomal protein L17 OS=Homo sapiens GN=RPL17 PE=1 SV=3	60S ribosomal protein L17	7	7	7	1	7	7	7	5	0	4	6	6	4	5	4	7	7	2	3	5	3	2	2	0	0	0	1	0	0	1	0	3	2	3	1	0	0	2	3	0	1	0	2	1	0	2
RPL18	Q07020	60S ribosomal protein L18 OS=Homo sapiens GN=RPL18 PE=1 SV=2	60S ribosomal protein L18	5	5	5	1	5	5	5	2	1	2	1	2	2	2	3	5	5	2	1	3	0	2	0	0	1	1	0	0	2	1	0	1	0	0	1	2	1	1	2	0	0	1	1	0	1	0
RPL18A	Q02543	60S ribosomal protein L18a OS=Homo sapiens GN=RPL18A PE=1 SV=2	60S ribosomal protein L18a	7	7	7	1	7	7	7	2	0	3	3	2	1	4	4	6	6	2	3	4	3	3	1	0	0	1	1	1	0	2	0	1	1	1	0	0	0	4	3	0	1	0	2	1	0	0
RPL19	P84098	60S ribosomal protein L19 OS=Homo sapiens GN=RPL19 PE=1 SV=1	60S ribosomal protein L19	3	3	3	1	3	3	3	2	0	1	2	2	0	2	2	3	2	1	1	1	0	1	1	0	0	0	1	0	0	1	0	0	1	0	0	0	0	1	1	0	0	0	1	0	0	1
RPL21	P46778	60S ribosomal protein L21 OS=Homo sapiens GN=RPL21 PE=1 SV=2	60S ribosomal protein L21	6	6	6	1	6	6	6	3	0	3	3	3	1	3	3	6	4	0	2	2	1	1	0	0	0	0	0	0	0	1	0	1	1	1	1	0	0	2	1	1	1	0	0	0	0	1
RPL22	P35268	60S ribosomal protein L22 OS=Homo sapiens GN=RPL22 PE=1 SV=2	60S ribosomal protein L22	2	2	2	1	2	2	2	0	0	0	0	0	2	1	1	1	1	1	0	1	1	1	1	0	0	0	1	1	0	0	1	1	0	1	1	2	1	2	1	1	0	0	1	1	1	1
RPL23	P62829	60S ribosomal protein L23 OS=Homo sapiens GN=RPL23 PE=1 SV=1	60S ribosomal protein L23	4	4	4	1	4	4	4	3	0	3	2	3	0	2	3	4	4	1	3	2	3	2	2	1	0	0	0	0	0	1	0	2	1	1	0	0	0	1	2	0	2	0	1	0	0	0
RPL23A	P62750	60S ribosomal protein L23a OS=Homo sapiens GN=RPL23A PE=1 SV=1	60S ribosomal protein L23a	6	6	6	1	6	6	6	3	0	5	5	5	2	4	5	5	5	2	3	4	2	3	2	1	0	0	0	0	0	0	0	3	0	0	1	0	0	0	2	0	0	0	1	1	1	1
RPL24	P83731	60S ribosomal protein L24 OS=Homo sapiens GN=RPL24 PE=1 SV=1	60S ribosomal protein L24	6	6	6	1	6	6	6	2	0	2	1	4	1	4	5	6	6	2	2	2	1	2	1	0	0	0	0	0	0	0	0	0	0	1	1	0	0	4	4	0	0	0	2	1	0	2
RPL26	P61254	60S ribosomal protein L26 OS=Homo sapiens GN=RPL26 PE=1 SV=1;60S ribosomal protein L26-like 1 OS=Homo sapiens GN=RPL26L1 PE=1 SV=1	60S ribosomal protein L26;60S ribosomal protein L26-like 1	6;5	6;5	6;5	2	6	6	6	5	0	5	4	5	3	6	6	6	6	3	4	5	2	3	2	2	1	1	2	1	0	2	0	2	1	1	0	1	0	5	4	0	3	0	3	2	0	0
RPL27	P61353	60S ribosomal protein L27 OS=Homo sapiens GN=RPL27 PE=1 SV=2	60S ribosomal protein L27	6	6	6	1	6	6	6	2	0	4	4	6	2	5	5	6	6	0	2	4	2	2	2	0	0	0	1	1	0	1	0	1	0	1	0	0	0	2	2	0	0	0	0	1	0	1
RPL27A	P46776	60S ribosomal protein L27a OS=Homo sapiens GN=RPL27A PE=1 SV=2	60S ribosomal protein L27a	3	3	3	1	3	3	3	2	0	1	1	1	0	1	1	3	3	0	1	0	1	1	1	1	0	0	0	0	0	0	0	0	1	1	1	1	0	1	1	0	0	0	1	1	0	1
RPL28	P46779	60S ribosomal protein L28 OS=Homo sapiens GN=RPL28 PE=1 SV=3	60S ribosomal protein L28	4	4	4	1	4	4	4	0	0	0	0	0	0	0	2	4	4	0	0	1	0	1	1	0	0	0	0	0	0	0	0	1	1	0	0	0	0	0	1	0	0	0	0	0	0	0
RPL3	P39023	60S ribosomal protein L3 OS=Homo sapiens GN=RPL3 PE=1 SV=2	60S ribosomal protein L3	20;1	20;1	20;1	2	20	20	20	6	0	8	6	6	5	10	10	18	18	8	7	7	4	2	1	2	0	0	2	3	0	2	1	3	1	3	0	1	1	6	4	0	2	0	4	1	0	1
RPL30	P62888	60S ribosomal protein L30 OS=Homo sapiens GN=RPL30 PE=1 SV=2	60S ribosomal protein L30	6	6	6	1	6	6	6	3	0	5	5	5	1	5	4	6	6	2	1	5	2	2	1	1	0	0	0	0	0	2	1	1	1	2	0	0	0	2	2	0	1	0	3	2	0	1
RPL31	P62899	60S ribosomal protein L31 OS=Homo sapiens GN=RPL31 PE=1 SV=1	60S ribosomal protein L31	4	4	4	1	4	4	4	2	0	1	2	3	1	3	2	3	4	1	3	2	2	1	0	1	0	0	0	0	0	0	0	1	0	2	0	0	0	1	2	0	0	0	2	2	0	1
RPL32	P62910	60S ribosomal protein L32 OS=Homo sapiens GN=RPL32 PE=1 SV=2	60S ribosomal protein L32	4	4	4	1	4	4	4	2	0	2	2	2	0	2	2	4	3	1	0	2	1	1	0	0	0	0	0	0	0	0	0	0	0	0	0	0	0	1	2	0	0	0	0	0	0	0
RPL35	P42766	60S ribosomal protein L35 OS=Homo sapiens GN=RPL35 PE=1 SV=2	60S ribosomal protein L35	2	2	2	1	2	2	2	1	0	0	1	1	1	2	2	2	2	1	1	2	1	1	0	0	0	0	0	0	0	1	0	1	0	0	0	0	0	1	1	0	0	0	1	0	0	0
RPL35A	P18077	60S ribosomal protein L35a OS=Homo sapiens GN=RPL35A PE=1 SV=2	60S ribosomal protein L35a	8	8	8	1	8	8	8	6	0	5	4	6	5	7	6	7	7	3	7	6	5	2	3	2	0	1	1	0	0	1	0	3	0	3	1	0	0	4	4	0	2	0	3	3	0	3
RPL36	Q9Y3U8	60S ribosomal protein L36 OS=Homo sapiens GN=RPL36 PE=1 SV=3	60S ribosomal protein L36	3	3	3	1	3	3	3	0	0	0	0	0	0	1	0	2	2	0	0	0	0	0	0	0	0	0	0	0	0	0	0	0	0	0	1	0	0	1	2	0	0	0	0	0	0	0
RPL36A	P83881	60S ribosomal protein L36a OS=Homo sapiens GN=RPL36A PE=1 SV=2	60S ribosomal protein L36a	4	4	1	1	4	4	1	0	0	1	1	1	1	1	1	4	4	0	1	0	0	1	0	0	0	0	0	0	0	1	0	1	0	0	0	0	0	0	1	1	0	0	0	0	0	0
RPL37A	P61513	60S ribosomal protein L37a OS=Homo sapiens GN=RPL37A PE=1 SV=2	60S ribosomal protein L37a	3;1	3;1	3;1	2	3	3	3	2	0	2	2	2	1	1	2	3	3	1	2	2	1	2	1	1	0	0	1	0	0	1	1	2	1	1	0	0	0	1	2	0	1	0	3	3	0	1
RPL38	P63173	60S ribosomal protein L38 OS=Homo sapiens GN=RPL38 PE=1 SV=2	60S ribosomal protein L38	3	3	3	1	3	3	3	2	0	3	3	2	0	3	2	3	3	3	2	2	2	3	2	0	0	0	0	0	0	2	0	0	0	1	0	0	0	1	1	0	1	0	1	1	0	1
RPL4	P36578	60S ribosomal protein L4 OS=Homo sapiens GN=RPL4 PE=1 SV=5	60S ribosomal protein L4	22	22	22	1	22	22	22	5	0	8	7	10	1	12	13	22	18	3	2	8	3	3	4	1	0	1	0	0	0	1	1	5	0	2	1	1	1	7	8	0	1	0	1	0	0	1
RPL5	P46777	60S ribosomal protein L5 OS=Homo sapiens GN=RPL5 PE=1 SV=3	60S ribosomal protein L5	10	10	10	1	10	10	10	6	0	9	8	10	6	10	10	10	9	0	6	8	1	2	0	0	0	0	5	0	0	0	0	6	0	7	0	0	0	4	5	0	1	0	2	0	0	1
RPL6	Q02878	60S ribosomal protein L6 OS=Homo sapiens GN=RPL6 PE=1 SV=3	60S ribosomal protein L6	13	13	13	1	13	13	13	3	0	4	2	4	1	5	6	13	13	0	2	3	1	3	2	1	0	1	0	0	0	1	0	3	0	0	0	0	0	3	3	0	0	0	1	1	0	3
RPL7	P18124	60S ribosomal protein L7 OS=Homo sapiens GN=RPL7 PE=1 SV=1	60S ribosomal protein L7	12	12	12	1	12	12	12	5	0	7	7	7	2	8	6	11	11	4	3	6	3	4	4	2	0	0	1	0	0	2	0	3	0	1	1	1	1	3	3	0	1	0	4	1	0	0
RPL7A	P62424	60S ribosomal protein L7a OS=Homo sapiens GN=RPL7A PE=1 SV=2	60S ribosomal protein L7a	13	13	13	1	13	13	13	8	0	7	5	6	1	6	9	13	12	3	3	6	1	0	0	0	0	0	0	0	0	2	0	1	0	1	0	1	0	4	3	0	2	0	1	0	0	1
RPL8	P62917	60S ribosomal protein L8 OS=Homo sapiens GN=RPL8 PE=1 SV=2	60S ribosomal protein L8	6	6	6	1	6	6	6	2	0	2	3	3	2	3	4	6	6	1	1	2	0	1	0	0	0	1	1	0	1	1	0	3	0	2	2	0	1	4	2	0	0	1	1	1	1	0
RPL9	P32969	60S ribosomal protein L9 OS=Homo sapiens GN=RPL9 PE=1 SV=1	60S ribosomal protein L9	7	7	7	1	7	7	7	5	0	6	6	6	1	6	5	7	7	4	5	5	3	4	2	1	0	0	1	0	0	3	1	0	0	0	2	0	1	3	2	0	4	0	2	2	0	2
RPLP0	P05388	60S acidic ribosomal protein P0 OS=Homo sapiens GN=RPLP0 PE=1 SV=1;60S acidic ribosomal protein P0-like OS=Homo sapiens GN=RPLP0P6 PE=5 SV=1	60S acidic ribosomal protein P0;60S acidic ribosomal protein P0-like	9;6	9;6	9;6	2	9	9	9	9	1	8	9	9	3	9	9	9	9	6	8	9	8	8	6	3	0	0	1	1	0	6	1	5	5	4	4	1	0	5	6	0	5	1	6	6	0	3
RPLP2	P05387	60S acidic ribosomal protein P2 OS=Homo sapiens GN=RPLP2 PE=1 SV=1	60S acidic ribosomal protein P2	8	8	7	1	8	8	7	6	1	6	6	6	4	7	7	7	7	5	7	6	4	4	4	3	2	1	3	2	0	6	2	4	3	4	3	2	3	4	4	3	6	1	5	5	1	5
RPN1	P04843	Dolichyl-diphosphooligosaccharide--protein glycosyltransferase subunit 1 OS=Homo sapiens GN=RPN1 PE=1 SV=1	Dolichyl-diphosphooligosaccharide--protein glycosyltransferase subunit 1	20	20	20	1	20	20	20	13	1	15	16	15	9	18	16	19	18	7	13	14	10	9	11	6	1	2	4	3	1	11	4	7	4	8	3	1	1	4	10	0	9	0	8	9	1	6
RPN2	P04844	Dolichyl-diphosphooligosaccharide--protein glycosyltransferase subunit 2 OS=Homo sapiens GN=RPN2 PE=1 SV=3	Dolichyl-diphosphooligosaccharide--protein glycosyltransferase subunit 2	14	14	14	1	14	14	14	9	0	11	11	12	4	13	10	13	12	5	11	7	5	5	4	5	0	0	1	0	1	8	2	3	1	3	3	1	2	4	4	1	7	0	6	7	1	3
RPS10	P46783	40S ribosomal protein S10 OS=Homo sapiens GN=RPS10 PE=1 SV=1;Putative 40S ribosomal protein S10-like OS=Homo sapiens GN=RPS10P5 PE=5 SV=1	40S ribosomal protein S10;Putative 40S ribosomal protein S10-like	8;5	8;5	8;5	2	8	8	8	4	0	6	7	6	2	6	4	8	6	1	3	4	3	4	3	0	0	0	0	0	1	1	0	3	0	2	0	0	0	2	1	0	0	0	2	2	1	0
RPS11	P62280	40S ribosomal protein S11 OS=Homo sapiens GN=RPS11 PE=1 SV=3	40S ribosomal protein S11	7	7	7	1	7	7	7	3	0	3	2	3	1	4	4	7	7	0	2	2	1	2	1	0	0	0	1	0	0	0	0	1	0	2	1	0	0	5	4	0	1	0	1	1	0	1
RPS12	P25398	40S ribosomal protein S12 OS=Homo sapiens GN=RPS12 PE=1 SV=3	40S ribosomal protein S12	6	6	6	1	6	6	6	4	0	5	5	5	2	5	5	5	5	1	4	4	5	4	3	2	0	0	1	1	0	3	2	3	1	1	2	2	0	1	4	0	3	0	3	3	0	2
RPS13	P62277	40S ribosomal protein S13 OS=Homo sapiens GN=RPS13 PE=1 SV=2	40S ribosomal protein S13	7	7	7	1	7	7	7	5	1	5	5	4	2	5	3	7	7	2	4	3	3	1	1	0	0	0	1	0	0	2	0	1	0	1	1	0	0	4	3	1	2	0	0	1	0	1
RPS14	P62263	40S ribosomal protein S14 OS=Homo sapiens GN=RPS14 PE=1 SV=3	40S ribosomal protein S14	5	5	5	1	5	5	5	4	0	4	4	4	1	3	4	5	5	1	2	1	2	1	1	0	0	0	2	0	0	0	0	3	0	3	0	0	0	3	1	0	0	0	1	0	0	0
RPS15	P62841	40S ribosomal protein S15 OS=Homo sapiens GN=RPS15 PE=1 SV=2	40S ribosomal protein S15	3	3	3	1	3	3	3	2	0	3	3	3	1	3	2	3	2	1	2	2	1	0	1	0	0	0	0	0	0	1	0	0	0	1	0	0	0	0	2	0	0	0	2	0	0	0
RPS15A	P62244	40S ribosomal protein S15a OS=Homo sapiens GN=RPS15A PE=1 SV=2	40S ribosomal protein S15a	7	7	7	1	7	7	7	4	0	1	2	3	0	3	2	5	6	1	1	2	2	2	3	0	0	0	1	0	0	1	0	2	0	1	1	0	0	4	1	0	1	0	0	0	0	1
RPS16	P62249	40S ribosomal protein S16 OS=Homo sapiens GN=RPS16 PE=1 SV=2	40S ribosomal protein S16	7	7	7	1	7	7	7	5	1	6	5	6	3	5	6	7	7	3	5	6	4	3	3	1	1	2	3	2	0	4	2	3	1	3	3	1	1	4	5	1	2	0	4	3	0	3
RPS17L	P0CW22	40S ribosomal protein S17-like OS=Homo sapiens GN=RPS17L PE=1 SV=1;40S ribosomal protein S17 OS=Homo sapiens GN=RPS17 PE=1 SV=2	40S ribosomal protein S17-like;40S ribosomal protein S17	7;7	7;7	7;7	2	7	7	7	5	0	5	7	6	2	7	7	7	7	3	4	5	2	2	0	0	0	0	1	0	0	2	0	1	1	1	0	0	0	1	2	0	0	0	2	1	0	1
RPS18	P62269	40S ribosomal protein S18 OS=Homo sapiens GN=RPS18 PE=1 SV=3	40S ribosomal protein S18	12	12	12	1	12	12	12	11	0	8	6	9	5	9	10	12	12	3	7	9	1	3	1	0	0	0	4	0	0	2	0	4	1	2	2	1	0	5	6	2	0	0	2	0	0	3
RPS19	P39019	40S ribosomal protein S19 OS=Homo sapiens GN=RPS19 PE=1 SV=2	40S ribosomal protein S19	5	5	5	1	5	5	5	4	0	4	5	5	3	4	4	5	4	1	4	2	3	3	2	0	0	1	0	0	0	2	0	3	2	1	0	1	1	2	3	1	1	1	3	2	0	1
RPS2	P15880	40S ribosomal protein S2 OS=Homo sapiens GN=RPS2 PE=1 SV=2	40S ribosomal protein S2	8	8	8	1	8	8	8	1	0	2	2	2	2	3	3	8	6	1	2	2	1	1	1	1	0	1	0	0	0	1	0	1	1	0	1	0	0	3	4	0	2	0	1	1	0	1
RPS20	P60866	40S ribosomal protein S20 OS=Homo sapiens GN=RPS20 PE=1 SV=1	40S ribosomal protein S20	4	4	4	1	4	4	4	3	0	4	4	4	2	4	4	4	4	2	3	3	3	1	1	1	0	0	1	0	0	1	0	4	1	2	1	0	2	3	3	0	1	0	3	3	0	2
RPS21	P63220	40S ribosomal protein S21 OS=Homo sapiens GN=RPS21 PE=1 SV=1	40S ribosomal protein S21	4	4	4	1	4	4	4	4	1	3	3	4	2	3	2	4	4	2	3	2	2	2	2	1	0	1	1	0	0	4	1	3	2	2	2	1	1	2	2	0	2	1	0	2	0	3
RPS23	P62266	40S ribosomal protein S23 OS=Homo sapiens GN=RPS23 PE=1 SV=3	40S ribosomal protein S23	6	6	6	1	6	6	6	4	0	2	3	4	2	5	4	6	6	2	3	5	3	2	1	1	0	0	1	0	0	2	0	4	0	3	1	0	0	1	3	0	1	0	2	1	0	2
RPS24	P62847	40S ribosomal protein S24 OS=Homo sapiens GN=RPS24 PE=1 SV=1	40S ribosomal protein S24	5	5	5	1	5	5	5	2	0	3	2	1	1	4	2	4	5	1	2	2	1	1	1	0	0	0	0	0	0	2	0	1	0	0	1	0	0	2	2	0	1	0	0	0	0	0
RPS25	P62851	40S ribosomal protein S25 OS=Homo sapiens GN=RPS25 PE=1 SV=1	40S ribosomal protein S25	5	5	5	1	5	5	5	3	0	3	4	4	3	4	4	5	5	1	2	4	3	3	2	1	0	0	1	1	0	1	1	2	2	1	0	0	1	3	3	0	0	0	1	1	0	1
RPS26	P62854	40S ribosomal protein S26 OS=Homo sapiens GN=RPS26 PE=1 SV=3;Putative 40S ribosomal protein S26-like 1 OS=Homo sapiens GN=RPS26P11 PE=5 SV=1	40S ribosomal protein S26;Putative 40S ribosomal protein S26-like 1	3;2	3;2	3;2	2	3	3	3	3	0	3	3	3	2	3	3	3	3	1	2	3	2	2	3	2	0	0	3	1	0	2	1	2	0	1	0	1	1	3	3	0	2	0	2	2	0	2
RPS27	P42677	40S ribosomal protein S27 OS=Homo sapiens GN=RPS27 PE=1 SV=3	40S ribosomal protein S27	4	4	2	1	4	4	2	2	0	3	2	3	1	3	3	4	3	0	1	2	1	0	0	0	0	0	0	0	0	0	0	3	0	2	0	0	0	0	3	0	0	0	2	1	0	1
RPS27A	P62979	Ubiquitin-40S ribosomal protein S27a OS=Homo sapiens GN=RPS27A PE=1 SV=2;Ubiquitin-60S ribosomal protein L40 OS=Homo sapiens GN=UBA52 PE=1 SV=2;Polyubiquitin-B OS=Homo sapiens GN=UBB PE=1 SV=1;Polyubiquitin-C OS=Homo sapiens GN=UBC PE=1 SV=3	Ubiquitin-40S ribosomal protein S27a;Ubiquitin;40S ribosomal protein S27a;Ubiquitin-60S ribosomal protein L40;Ubiquitin;60S ribosomal protein L40;Polyubiquitin-B;Ubiquitin;Polyubiquitin-C;Ubiquitin	5;4;4;4	5;4;4;4	5;4;4;4	4	5	5	5	4	3	5	5	5	3	5	5	5	5	3	4	3	4	4	4	3	1	3	5	3	3	4	4	3	2	3	3	2	2	3	3	2	4	2	4	4	2	4
RPS28	P62857	40S ribosomal protein S28 OS=Homo sapiens GN=RPS28 PE=1 SV=1	40S ribosomal protein S28	2	2	2	1	2	2	2	2	0	2	2	2	2	2	2	2	2	0	2	2	2	2	2	1	0	0	0	1	0	2	1	2	2	2	2	2	1	1	1	0	2	0	1	1	0	0
RPS3	P23396	40S ribosomal protein S3 OS=Homo sapiens GN=RPS3 PE=1 SV=2	40S ribosomal protein S3	14	14	14	1	14	14	14	11	0	13	13	13	6	13	11	13	13	7	9	9	9	6	6	3	1	0	5	1	1	5	2	5	3	5	4	3	2	6	5	2	5	0	4	4	0	5
RPS3A	P61247	40S ribosomal protein S3a OS=Homo sapiens GN=RPS3A PE=1 SV=2	40S ribosomal protein S3a	15	15	15	1	15	15	15	7	2	8	7	12	3	9	10	15	14	4	5	8	3	4	2	0	2	1	4	1	2	1	0	5	2	6	2	2	0	7	7	1	1	0	4	4	0	2
RPS4X	P62701	40S ribosomal protein S4, X isoform OS=Homo sapiens GN=RPS4X PE=1 SV=2	40S ribosomal protein S4, X isoform	15	15	8	1	15	15	8	8	0	5	5	5	1	8	5	15	13	3	2	5	4	4	2	2	0	0	3	0	1	2	1	4	3	1	3	0	1	4	6	0	1	1	4	2	1	2
RPS5	P46782	40S ribosomal protein S5 OS=Homo sapiens GN=RPS5 PE=1 SV=4	40S ribosomal protein S5;40S ribosomal protein S5, N-terminally processed	4	4	4	1	4	4	4	3	0	3	3	3	1	2	3	3	3	1	3	1	3	3	1	1	0	0	1	0	0	2	0	1	0	1	0	0	0	0	1	0	1	0	2	1	0	2
RPS6	P62753	40S ribosomal protein S6 OS=Homo sapiens GN=RPS6 PE=1 SV=1	40S ribosomal protein S6	12	12	12	1	12	12	12	4	0	3	4	5	1	4	6	12	11	3	1	4	3	1	2	1	0	0	2	0	1	1	1	0	2	2	0	1	1	5	3	0	2	2	3	1	0	2
RPS6KA3	P51812	Ribosomal protein S6 kinase alpha-3 OS=Homo sapiens GN=RPS6KA3 PE=1 SV=1;Ribosomal protein S6 kinase alpha-2 OS=Homo sapiens GN=RPS6KA2 PE=1 SV=2;Ribosomal protein S6 kinase alpha-1 OS=Homo sapiens GN=RPS6KA1 PE=1 SV=2	Ribosomal protein S6 kinase alpha-3;Ribosomal protein S6 kinase alpha-2;Ribosomal protein S6 kinase alpha-1	2;1;1	2;1;1	2;1;1	3	2	2	2	2	1	1	2	2	0	0	1	2	2	1	2	0	1	1	1	1	0	0	1	1	0	1	1	1	0	1	0	0	0	0	0	1	1	0	0	1	1	1
RPS7	P62081	40S ribosomal protein S7 OS=Homo sapiens GN=RPS7 PE=1 SV=1	40S ribosomal protein S7	10	10	10	1	10	10	10	6	1	8	8	7	6	9	9	10	9	6	5	5	4	5	2	1	1	0	0	1	2	3	1	4	3	4	3	2	1	6	7	1	3	1	4	0	0	1
RPS8	P62241	40S ribosomal protein S8 OS=Homo sapiens GN=RPS8 PE=1 SV=2	40S ribosomal protein S8	11	11	11	1	11	11	11	5	1	6	5	8	3	9	10	11	11	4	4	7	3	2	4	2	1	1	4	2	0	3	3	2	3	3	3	3	4	7	7	3	2	1	3	2	0	2
RPS9	P46781	40S ribosomal protein S9 OS=Homo sapiens GN=RPS9 PE=1 SV=3	40S ribosomal protein S9	10	10	10	1	10	10	10	6	0	2	2	2	1	4	5	10	10	2	2	4	2	2	1	1	0	0	1	0	0	1	0	0	0	2	0	0	0	1	2	0	0	0	1	1	0	0
RPSA	P08865	40S ribosomal protein SA OS=Homo sapiens GN=RPSA PE=1 SV=4	40S ribosomal protein SA	9	9	9	1	9	9	9	6	0	6	7	7	4	6	8	9	9	6	7	8	6	6	6	3	2	1	2	1	0	7	3	5	4	3	4	3	4	6	4	2	5	1	5	5	2	3
RRAGA	Q7L523	Ras-related GTP-binding protein A OS=Homo sapiens GN=RRAGA PE=1 SV=1;Ras-related GTP-binding protein B OS=Homo sapiens GN=RRAGB PE=1 SV=1	Ras-related GTP-binding protein A;Ras-related GTP-binding protein B	2;1	2;1	2;1	2	2	2	2	1	0	1	1	1	1	1	1	1	1	0	1	0	1	1	1	0	0	0	0	0	0	0	0	0	0	0	0	0	0	0	0	0	0	0	0	0	0	0
RRAGC	Q9HB90	Ras-related GTP-binding protein C OS=Homo sapiens GN=RRAGC PE=1 SV=1;Ras-related GTP-binding protein D OS=Homo sapiens GN=RRAGD PE=1 SV=1	Ras-related GTP-binding protein C;Ras-related GTP-binding protein D	3;3	3;3	3;3	2	3	3	3	1	0	1	2	2	0	1	1	1	1	1	1	1	1	1	1	0	0	0	0	0	0	1	0	0	1	1	0	0	0	0	1	0	1	0	1	1	0	0
RRAS	P10301	Ras-related protein R-Ras OS=Homo sapiens GN=RRAS PE=1 SV=1	Ras-related protein R-Ras	9	9	7	1	9	9	7	8	2	5	6	6	2	4	5	6	6	2	8	4	6	6	4	4	1	1	4	3	1	5	2	6	4	4	2	2	1	2	4	0	7	0	7	7	0	4
RRAS2	P62070	Ras-related protein R-Ras2 OS=Homo sapiens GN=RRAS2 PE=1 SV=1	Ras-related protein R-Ras2	6	4	4	1	6	4	4	4	1	4	4	4	2	4	2	3	2	1	5	3	4	4	5	2	1	1	2	1	1	4	1	4	3	2	1	0	0	0	3	0	5	0	6	4	0	2
RRBP1	Q9P2E9	Ribosome-binding protein 1 OS=Homo sapiens GN=RRBP1 PE=1 SV=4	Ribosome-binding protein 1	3	3	3	1	3	3	3	2	0	2	3	3	0	3	2	3	3	1	1	1	1	2	1	0	0	0	0	0	0	0	0	0	0	0	0	0	0	0	1	0	0	0	0	0	0	0
RSL1D1	O76021	Ribosomal L1 domain-containing protein 1 OS=Homo sapiens GN=RSL1D1 PE=1 SV=3	Ribosomal L1 domain-containing protein 1	2	2	2	1	2	2	2	0	0	0	0	0	0	0	0	2	1	0	0	0	0	0	0	0	0	0	0	0	0	0	0	0	0	0	0	0	0	0	0	0	0	0	0	0	0	0
RSU1	Q15404	Ras suppressor protein 1 OS=Homo sapiens GN=RSU1 PE=1 SV=3	Ras suppressor protein 1	6	6	6	1	6	6	6	5	0	4	4	4	1	4	4	4	5	0	4	0	3	5	3	1	0	0	1	0	0	3	0	2	0	1	0	0	0	0	1	0	2	0	4	3	0	2
RTCB	Q9Y3I0	tRNA-splicing ligase RtcB homolog OS=Homo sapiens GN=RTCB PE=1 SV=1	tRNA-splicing ligase RtcB homolog	15	15	15	1	15	15	15	7	0	8	7	10	5	8	7	13	7	0	3	2	2	5	0	0	0	1	1	0	0	1	0	4	0	1	0	0	0	0	2	0	0	0	3	1	0	0
RTN1	Q16799	Reticulon-1 OS=Homo sapiens GN=RTN1 PE=1 SV=1	Reticulon-1	2	2	2	1	2	2	2	1	1	1	1	1	1	1	1	1	1	1	1	1	1	1	1	1	1	0	0	1	1	1	1	1	1	1	1	0	0	1	1	0	1	0	1	1	0	1
RTN3	O95197	Reticulon-3 OS=Homo sapiens GN=RTN3 PE=1 SV=2	Reticulon-3	2	2	2	1	2	2	2	1	0	1	1	1	1	1	1	1	1	0	1	1	1	1	1	1	0	0	0	0	0	1	0	1	0	1	0	0	0	0	2	0	1	0	2	2	0	2
RTN4	Q9NQC3	Reticulon-4 OS=Homo sapiens GN=RTN4 PE=1 SV=2	Reticulon-4	7	7	7	1	7	7	7	7	3	7	7	7	4	7	7	6	7	4	7	5	7	6	7	6	2	3	4	2	1	7	4	5	4	3	4	4	2	4	5	3	6	0	7	6	3	6
RUVBL1	Q9Y265	RuvB-like 1 OS=Homo sapiens GN=RUVBL1 PE=1 SV=1	RuvB-like 1	11	11	11	1	11	11	11	5	0	9	8	6	1	7	8	10	8	3	6	4	8	7	6	0	0	0	1	2	0	7	1	2	0	2	0	0	0	1	8	1	4	0	4	3	0	2
RUVBL2	Q9Y230	RuvB-like 2 OS=Homo sapiens GN=RUVBL2 PE=1 SV=3	RuvB-like 2	14	14	14	1	14	14	14	9	0	11	11	9	4	11	9	13	13	2	9	7	6	8	6	2	0	3	3	0	1	5	0	4	1	3	2	0	1	1	5	0	2	0	5	2	0	1
RYR2	Q92736	Ryanodine receptor 2 OS=Homo sapiens GN=RYR2 PE=1 SV=3	Ryanodine receptor 2	3;1	3;1	3;1	2	3	3	3	0	1	1	0	1	1	1	1	2	1	0	0	1	0	0	0	0	0	0	2	2	0	0	1	0	0	1	0	0	0	0	1	0	0	0	0	0	0	1
S100A10	P60903	Protein S100-A10 OS=Homo sapiens GN=S100A10 PE=1 SV=2	Protein S100-A10	6	6	6	1	6	6	6	2	3	4	4	4	4	4	4	4	4	2	3	3	4	4	3	3	0	1	2	1	0	4	0	3	4	4	1	1	0	2	3	1	4	1	3	4	3	3
S100A11	P31949	Protein S100-A11 OS=Homo sapiens GN=S100A11 PE=1 SV=2	Protein S100-A11;Protein S100-A11, N-terminally processed	7	7	7	1	7	7	7	7	5	7	7	7	7	7	6	7	7	6	7	7	6	6	7	7	2	2	4	4	2	6	2	7	6	6	5	4	4	4	5	1	7	2	5	5	5	4
S100A13	Q99584	Protein S100-A13 OS=Homo sapiens GN=S100A13 PE=1 SV=1	Protein S100-A13	4	4	4	1	4	4	4	4	0	4	4	4	1	4	4	3	4	0	4	1	4	4	3	2	0	0	0	0	0	4	0	2	1	1	0	0	0	0	1	0	4	0	2	1	1	1
S100A14	Q9HCY8	Protein S100-A14 OS=Homo sapiens GN=S100A14 PE=1 SV=1	Protein S100-A14	4	4	4	1	4	4	4	4	3	4	2	3	3	3	3	2	3	4	3	2	3	4	3	4	1	2	1	2	2	4	2	3	1	1	2	1	0	2	3	1	3	0	3	3	1	4
S100A16	Q96FQ6	Protein S100-A16 OS=Homo sapiens GN=S100A16 PE=1 SV=1	Protein S100-A16	6	6	6	1	6	6	6	5	4	6	6	6	3	6	6	5	5	3	5	3	4	6	4	5	0	1	3	4	1	6	4	3	0	3	0	0	1	1	3	1	5	0	4	4	1	1
S100A4	P26447	Protein S100-A4 OS=Homo sapiens GN=S100A4 PE=1 SV=1	Protein S100-A4	2	2	2	1	2	2	2	1	0	2	2	2	2	2	2	2	2	2	2	1	2	2	2	2	0	0	0	0	0	2	1	0	0	1	0	0	0	0	1	0	2	0	1	1	0	1
S100A6	P06703	Protein S100-A6 OS=Homo sapiens GN=S100A6 PE=1 SV=1	Protein S100-A6	5	5	5	1	5	5	5	3	2	3	3	3	3	3	3	3	3	2	3	1	3	3	3	2	1	2	3	1	0	3	2	3	2	3	2	2	2	2	3	2	3	2	4	4	2	2
S100A7	P31151	Protein S100-A7 OS=Homo sapiens GN=S100A7 PE=1 SV=4	Protein S100-A7	5;1	5;1	5;1	2	5	5	5	3	1	3	3	3	2	3	3	3	3	3	3	3	3	3	3	4	1	2	1	2	2	3	3	3	0	3	0	0	2	1	3	2	3	1	4	3	1	4
S100A8	P05109	Protein S100-A8 OS=Homo sapiens GN=S100A8 PE=1 SV=1	Protein S100-A8;Protein S100-A8, N-terminally processed	6	6	6	1	6	6	6	5	4	5	4	5	3	5	5	4	4	5	5	5	5	4	5	4	2	2	5	3	2	4	2	2	2	3	2	2	2	2	2	2	5	2	5	4	2	3
S100A9	P06702	Protein S100-A9 OS=Homo sapiens GN=S100A9 PE=1 SV=1	Protein S100-A9	9	9	9	1	9	9	9	7	6	6	7	7	6	7	7	6	6	6	6	7	6	7	6	7	3	4	5	6	5	7	6	6	2	4	4	3	3	4	7	5	7	4	6	7	3	8
SACM1L	Q9NTJ5	Phosphatidylinositide phosphatase SAC1 OS=Homo sapiens GN=SACM1L PE=1 SV=2	Phosphatidylinositide phosphatase SAC1	2	2	2	1	2	2	2	0	0	2	2	2	0	2	2	2	2	0	0	0	1	1	0	0	0	0	0	0	0	1	0	0	0	0	0	0	0	0	0	0	0	0	1	0	0	0
SAE1	Q9UBE0	SUMO-activating enzyme subunit 1 OS=Homo sapiens GN=SAE1 PE=1 SV=1	SUMO-activating enzyme subunit 1;SUMO-activating enzyme subunit 1, N-terminally processed	2	2	2	1	2	2	2	1	0	1	1	1	0	1	1	0	1	0	0	0	0	0	0	0	0	1	0	0	0	0	0	0	0	0	0	0	0	0	0	0	0	0	0	0	0	0
SAR1A	Q9NR31	GTP-binding protein SAR1a OS=Homo sapiens GN=SAR1A PE=1 SV=1	GTP-binding protein SAR1a	6	6	3	1	6	6	3	4	0	6	4	5	4	5	4	6	5	2	5	3	2	2	2	2	1	0	2	1	0	2	1	3	2	3	1	0	0	2	3	0	3	0	3	2	0	2
SARS	P49591	Serine--tRNA ligase, cytoplasmic OS=Homo sapiens GN=SARS PE=1 SV=3	Serine--tRNA ligase, cytoplasmic	4	4	4	1	4	4	4	4	0	4	3	3	0	4	4	4	4	0	3	3	2	4	1	0	0	0	0	0	0	1	0	0	0	0	1	0	0	0	0	0	1	0	1	1	0	1
SBSN	Q6UWP8	Suprabasin OS=Homo sapiens GN=SBSN PE=2 SV=2	Suprabasin	11	11	11	1	11	11	11	5	5	6	5	6	4	4	5	6	7	4	5	5	3	5	4	7	2	5	4	3	2	5	3	6	3	3	4	1	0	2	5	3	5	1	10	7	1	6
SCAMP2	O15127	Secretory carrier-associated membrane protein 2 OS=Homo sapiens GN=SCAMP2 PE=1 SV=2	Secretory carrier-associated membrane protein 2	2	2	2	1	2	2	2	2	0	2	2	2	0	2	2	2	2	0	2	1	0	1	0	0	0	0	0	0	0	1	0	0	0	0	0	0	0	0	1	0	1	0	1	2	0	2
SCAMP3	O14828	Secretory carrier-associated membrane protein 3 OS=Homo sapiens GN=SCAMP3 PE=1 SV=3	Secretory carrier-associated membrane protein 3	5	5	5	1	5	5	5	3	0	3	3	3	0	3	3	4	3	2	3	3	4	3	4	0	0	0	2	0	0	3	0	0	0	0	0	0	1	1	2	0	3	0	5	5	0	4
SCARB1	Q8WTV0	Scavenger receptor class B member 1 OS=Homo sapiens GN=SCARB1 PE=1 SV=1	Scavenger receptor class B member 1	3	3	3	1	3	3	3	2	0	2	2	3	1	2	0	2	3	0	2	2	2	2	3	0	0	0	0	0	0	2	0	1	1	1	0	0	0	0	0	0	2	0	1	1	0	0
SCARB2	Q14108	Lysosome membrane protein 2 OS=Homo sapiens GN=SCARB2 PE=1 SV=2	Lysosome membrane protein 2	11	11	11	1	11	11	11	8	2	6	6	9	3	6	6	6	7	3	7	5	7	8	7	2	0	1	0	1	0	9	1	2	0	2	0	0	0	0	2	1	7	0	5	6	0	3
SCFD1	Q8WVM8	Sec1 family domain-containing protein 1 OS=Homo sapiens GN=SCFD1 PE=1 SV=4	Sec1 family domain-containing protein 1	2	2	2	1	2	2	2	1	0	1	1	1	0	1	1	1	1	0	1	0	1	1	1	0	0	0	0	0	0	1	0	0	1	0	0	0	0	0	0	0	0	0	1	1	0	1
SCPEP1	Q9HB40	Retinoid-inducible serine carboxypeptidase OS=Homo sapiens GN=SCPEP1 PE=1 SV=1	Retinoid-inducible serine carboxypeptidase	3	3	3	1	3	3	3	2	1	2	1	2	0	1	1	2	2	2	2	1	2	2	0	1	0	0	2	0	0	1	2	1	0	1	0	1	0	0	0	0	1	0	2	2	0	1
SCRIB	Q14160	Protein scribble homolog OS=Homo sapiens GN=SCRIB PE=1 SV=4	Protein scribble homolog	4;1	4;1	4;1	2	4	4	4	3	0	2	3	2	0	1	0	1	2	0	3	0	3	3	2	0	0	0	0	0	0	2	0	0	0	0	0	0	0	0	0	0	2	0	1	0	0	0
SCRN1	Q12765	Secernin-1 OS=Homo sapiens GN=SCRN1 PE=1 SV=2	Secernin-1	6	6	6	1	6	6	6	5	0	5	6	6	2	5	3	6	4	0	6	0	6	5	5	1	1	0	1	0	0	3	0	4	1	3	0	0	0	0	4	0	2	0	4	3	0	0
SDC2	P34741	Syndecan-2 OS=Homo sapiens GN=SDC2 PE=1 SV=2	Syndecan-2	3	3	3	1	3	3	3	2	0	1	0	2	1	2	2	2	2	0	3	0	2	2	2	1	0	1	2	1	0	2	0	1	0	1	0	0	0	0	1	0	2	0	1	1	0	2
SDC4	P31431	Syndecan-4 OS=Homo sapiens GN=SDC4 PE=1 SV=2	Syndecan-4	3	3	3	1	3	3	3	2	0	0	1	1	1	1	1	2	2	1	1	2	1	1	2	0	0	0	2	1	0	0	0	0	0	0	0	1	1	1	2	0	0	0	0	0	0	1
SDCBP	O00560	Syntenin-1 OS=Homo sapiens GN=SDCBP PE=1 SV=1	Syntenin-1	14	14	14	1	14	14	14	13	4	10	11	12	1	10	6	10	11	0	14	4	12	13	13	7	3	0	12	8	3	14	7	1	0	1	1	1	1	1	5	1	13	0	9	12	6	11
SDF4	Q9BRK5	45 kDa calcium-binding protein OS=Homo sapiens GN=SDF4 PE=1 SV=1	45 kDa calcium-binding protein	2	2	2	1	2	2	2	0	0	2	0	2	1	2	1	2	2	0	1	1	1	1	1	0	0	0	0	0	0	0	0	1	0	1	0	0	0	0	0	0	0	0	0	0	0	0
SDR9C7	Q8NEX9	Short-chain dehydrogenase/reductase family 9C member 7 OS=Homo sapiens GN=SDR9C7 PE=2 SV=1	Short-chain dehydrogenase/reductase family 9C member 7	5	5	5	1	5	5	5	4	1	5	5	5	2	5	4	2	5	5	4	5	5	5	5	5	1	1	4	3	1	4	5	2	0	2	1	0	2	0	4	1	3	0	3	3	1	1
SEC11A	P67812	Signal peptidase complex catalytic subunit SEC11A OS=Homo sapiens GN=SEC11A PE=1 SV=1	Signal peptidase complex catalytic subunit SEC11A	4	4	4	1	4	4	4	3	0	3	3	3	0	3	2	4	3	1	3	2	2	2	2	1	0	0	0	0	0	2	0	0	0	0	0	0	0	0	0	0	2	0	0	0	0	0
SEC13	P55735	Protein SEC13 homolog OS=Homo sapiens GN=SEC13 PE=1 SV=3	Protein SEC13 homolog	5	5	5	1	5	5	5	5	0	4	5	4	2	5	4	5	4	3	5	3	5	5	3	1	0	0	1	0	0	2	1	1	0	0	0	0	0	0	1	0	2	0	2	1	0	1
SEC22B	O75396	Vesicle-trafficking protein SEC22b OS=Homo sapiens GN=SEC22B PE=1 SV=4	Vesicle-trafficking protein SEC22b	5	5	5	1	5	5	5	4	0	5	4	5	4	5	5	5	5	1	4	2	4	4	5	2	0	1	0	0	0	5	0	3	2	4	0	0	1	2	1	1	3	0	3	3	0	1
SEC23A	Q15436	Protein transport protein Sec23A OS=Homo sapiens GN=SEC23A PE=1 SV=2	Protein transport protein Sec23A	3	3	2	1	3	3	2	3	0	1	2	1	0	2	2	3	1	0	2	1	1	1	0	1	0	0	0	0	0	3	0	0	0	0	0	0	0	0	1	0	0	0	1	1	0	1
SEC23B	Q15437	Protein transport protein Sec23B OS=Homo sapiens GN=SEC23B PE=1 SV=2	Protein transport protein Sec23B	3	2	2	1	3	2	2	3	0	1	2	1	0	3	3	3	2	0	1	2	0	1	0	0	0	0	0	0	0	1	0	0	0	0	0	0	0	0	0	0	0	0	0	0	0	0
SEC23IP	Q9Y6Y8	SEC23-interacting protein OS=Homo sapiens GN=SEC23IP PE=1 SV=1	SEC23-interacting protein	3	3	3	1	3	3	3	0	0	1	1	0	0	0	1	3	1	0	0	1	1	1	1	0	0	0	0	0	0	1	0	0	0	0	0	0	0	0	1	0	0	0	1	0	0	0
SEC24A	O95486	Protein transport protein Sec24A OS=Homo sapiens GN=SEC24A PE=1 SV=2	Protein transport protein Sec24A	3	3	3	1	3	3	3	1	0	2	3	2	0	3	2	3	3	0	1	1	1	1	1	0	0	0	1	0	0	1	0	0	0	0	0	0	0	0	0	0	1	0	1	1	0	1
SEC24C	P53992	Protein transport protein Sec24C OS=Homo sapiens GN=SEC24C PE=1 SV=3	Protein transport protein Sec24C	2	2	2	1	2	2	2	2	0	2	1	2	1	2	2	2	2	0	2	0	2	2	2	0	0	0	0	0	0	0	0	1	0	1	0	0	0	1	0	0	0	0	0	0	0	0
SEC31A	O94979	Protein transport protein Sec31A OS=Homo sapiens GN=SEC31A PE=1 SV=3	Protein transport protein Sec31A	7	7	7	1	7	7	7	5	0	2	2	3	0	2	4	7	5	0	2	0	3	3	1	0	0	0	1	0	0	3	0	2	0	1	0	0	0	1	1	0	0	0	1	1	0	1
SEC61A1	P61619	Protein transport protein Sec61 subunit alpha isoform 1 OS=Homo sapiens GN=SEC61A1 PE=1 SV=2;Protein transport protein Sec61 subunit alpha isoform 2 OS=Homo sapiens GN=SEC61A2 PE=2 SV=3	Protein transport protein Sec61 subunit alpha isoform 1;Protein transport protein Sec61 subunit alpha isoform 2	6;4	6;4	6;4	2	6	6	6	6	1	5	4	6	3	5	6	6	6	1	6	4	3	2	1	0	0	0	4	0	0	2	2	4	0	4	0	0	0	0	2	0	0	0	2	0	0	2
SEC62	Q99442	Translocation protein SEC62 OS=Homo sapiens GN=SEC62 PE=1 SV=1	Translocation protein SEC62	2	2	2	1	2	2	2	1	0	2	2	2	1	2	2	2	2	0	1	0	1	1	1	0	0	0	0	0	0	0	0	1	0	1	0	0	0	0	1	0	0	0	2	0	0	0
SELENBP1	Q13228	Selenium-binding protein 1 OS=Homo sapiens GN=SELENBP1 PE=1 SV=2	Selenium-binding protein 1	2	2	2	1	2	2	2	1	1	2	1	1	1	1	1	1	1	1	1	0	2	2	2	0	0	0	0	0	0	1	1	0	0	1	0	0	0	0	0	0	1	1	0	0	0	1
SEMG1	P04279	Semenogelin-1 OS=Homo sapiens GN=SEMG1 PE=1 SV=2	Semenogelin-1;Alpha-inhibin-92;Alpha-inhibin-31;Seminal basic protein	13	13	10	1	13	13	10	10	11	9	12	9	7	11	11	10	11	10	10	10	9	9	10	9	3	4	6	6	2	10	10	7	3	8	3	1	6	2	6	3	11	2	11	10	3	12
SEMG2	Q02383	Semenogelin-2 OS=Homo sapiens GN=SEMG2 PE=1 SV=1	Semenogelin-2	13	10	10	1	13	10	10	7	5	7	9	6	5	8	6	6	7	7	7	7	8	7	7	7	2	1	5	4	1	8	6	4	3	5	1	2	5	1	10	1	8	1	11	10	2	9
SEPT11	Q9NVA2	Septin-11 OS=Homo sapiens GN=SEPT11 PE=1 SV=3	Septin-11	6;2;1	6;2;1	6;2;1	3	6	6	6	5	1	4	4	5	3	4	4	5	5	3	5	4	5	4	3	2	0	0	2	1	0	5	0	5	1	4	0	0	0	1	4	0	4	0	3	3	0	2
SEPT2	Q15019	Septin-2 OS=Homo sapiens GN=SEPT2 PE=1 SV=1	Septin-2	9	9	9	1	9	9	9	9	0	9	9	9	5	9	8	9	8	2	9	7	7	7	5	2	0	0	2	0	0	6	0	4	1	1	1	1	0	1	2	0	5	0	5	3	0	3
SEPT7	Q16181	Septin-7 OS=Homo sapiens GN=SEPT7 PE=1 SV=2	Septin-7	6;1	6;1	6;1	2	6	6	6	5	0	5	3	5	1	6	5	5	5	1	5	5	4	5	5	2	0	0	2	0	1	5	0	2	0	1	1	0	0	0	3	0	2	1	2	2	0	1
SEPT9	Q9UHD8	Septin-9 OS=Homo sapiens GN=SEPT9 PE=1 SV=2	Septin-9	6	6	6	1	6	6	6	5	1	5	6	5	2	4	5	6	5	0	5	2	3	3	3	3	0	1	1	0	0	4	0	3	1	1	0	0	0	1	2	1	3	0	3	3	1	1
SERINC1	Q9NRX5	Serine incorporator 1 OS=Homo sapiens GN=SERINC1 PE=1 SV=1	Serine incorporator 1	3	3	3	1	3	3	3	3	0	2	2	3	1	3	1	3	2	0	3	0	2	2	1	1	0	0	2	1	0	3	0	1	0	2	0	0	0	0	0	0	3	0	2	2	0	0
SERPINA12	Q8IW75	Serpin A12 OS=Homo sapiens GN=SERPINA12 PE=1 SV=1	Serpin A12	7	7	7	1	7	7	7	5	3	5	4	5	4	6	5	3	5	5	5	4	4	4	5	6	2	1	2	1	1	5	4	4	0	4	0	2	0	0	5	2	5	1	4	4	0	5
SERPINA3	P01011	Alpha-1-antichymotrypsin OS=Homo sapiens GN=SERPINA3 PE=1 SV=2	Alpha-1-antichymotrypsin;Alpha-1-antichymotrypsin His-Pro-less	3	3	3	1	3	3	3	2	0	1	2	0	1	2	1	0	1	1	1	1	1	1	2	2	0	1	1	1	1	1	2	1	0	1	0	0	1	0	3	0	1	0	1	1	0	2
SERPINB1	P30740	Leukocyte elastase inhibitor OS=Homo sapiens GN=SERPINB1 PE=1 SV=1	Leukocyte elastase inhibitor	3	2	2	1	3	2	2	3	0	3	3	3	0	3	3	3	2	1	3	3	2	2	2	1	0	0	0	1	0	2	0	0	0	0	0	0	0	0	1	0	0	0	0	0	0	0
SERPINB12	Q96P63	Serpin B12 OS=Homo sapiens GN=SERPINB12 PE=1 SV=1	Serpin B12	13	13	13	1	13	13	13	9	5	9	9	9	5	9	8	9	10	9	8	9	9	8	9	10	5	6	7	5	4	8	8	6	2	4	4	4	3	3	6	5	10	4	10	10	4	11
SERPINB2	P05120	Plasminogen activator inhibitor 2 OS=Homo sapiens GN=SERPINB2 PE=1 SV=2	Plasminogen activator inhibitor 2	4	4	4	1	4	4	4	4	1	3	1	2	1	3	2	0	2	1	4	1	2	3	2	1	0	0	1	1	0	2	1	0	0	1	0	0	0	0	0	0	2	0	2	2	0	1
SERPINB3	P29508	Serpin B3 OS=Homo sapiens GN=SERPINB3 PE=1 SV=2	Serpin B3	21	21	10	1	21	21	10	18	11	18	17	15	9	18	18	14	15	15	16	18	11	14	15	16	2	7	9	5	6	20	11	6	1	7	3	1	0	3	11	6	19	1	17	17	6	16
SERPINB4	P48594	Serpin B4 OS=Homo sapiens GN=SERPINB4 PE=1 SV=2	Serpin B4	14	3	3	1	14	3	3	12	7	12	10	8	6	10	10	6	8	10	9	12	7	9	9	9	1	4	8	5	5	13	8	4	0	5	2	1	0	2	8	3	12	0	11	11	4	10
SERPINB5	P36952	Serpin B5 OS=Homo sapiens GN=SERPINB5 PE=1 SV=2	Serpin B5	3	3	3	1	3	3	3	2	1	2	1	2	0	3	1	0	0	3	3	3	0	0	3	1	0	0	0	0	0	3	3	0	0	0	0	0	1	0	1	0	2	0	1	0	0	1
SERPINB6	P35237	Serpin B6 OS=Homo sapiens GN=SERPINB6 PE=1 SV=3	Serpin B6	11	11	10	1	11	11	10	8	0	10	9	10	5	6	4	4	5	4	9	4	7	5	6	4	1	1	0	1	1	7	4	6	4	4	3	1	1	3	4	2	6	0	5	5	0	6
SERPINB7	O75635	Serpin B7 OS=Homo sapiens GN=SERPINB7 PE=1 SV=1	Serpin B7	3	3	3	1	3	3	3	2	1	1	0	1	0	2	2	0	0	1	1	1	1	2	1	1	0	2	0	1	0	1	1	2	1	1	1	1	0	1	2	0	1	0	0	0	0	1
SERPINB8	P50452	Serpin B8 OS=Homo sapiens GN=SERPINB8 PE=1 SV=2	Serpin B8	5;1;1	4;1;1	3;0;0	3	5	4	3	3	1	3	3	3	1	3	3	3	3	2	3	3	4	3	3	2	0	0	0	1	0	3	2	2	1	2	0	0	0	0	3	1	2	0	4	4	0	3
SERPINE1	P05121	Plasminogen activator inhibitor 1 OS=Homo sapiens GN=SERPINE1 PE=1 SV=1	Plasminogen activator inhibitor 1	4	4	4	1	4	4	4	2	0	1	1	3	0	0	1	3	3	0	2	0	2	2	1	2	0	1	1	0	0	2	1	0	0	0	0	0	0	1	0	0	3	0	2	2	0	1
SERPINE2	P07093	Glia-derived nexin OS=Homo sapiens GN=SERPINE2 PE=1 SV=1	Glia-derived nexin	3	3	3	1	3	3	3	1	0	3	1	2	0	3	3	3	2	0	2	1	1	2	1	0	0	0	1	0	0	1	0	0	0	0	0	0	0	0	1	0	1	0	1	1	0	2
SERPINH1	P50454	Serpin H1 OS=Homo sapiens GN=SERPINH1 PE=1 SV=2	Serpin H1	14	14	14	1	14	14	14	14	1	14	14	13	9	13	12	14	13	3	12	8	9	8	6	7	1	0	3	2	0	12	2	7	4	6	2	2	2	4	3	0	10	2	7	8	0	6
SET	Q01105	Protein SET OS=Homo sapiens GN=SET PE=1 SV=3;Protein SETSIP OS=Homo sapiens GN=SETSIP PE=1 SV=1	Protein SET;Protein SETSIP	3;3	3;3	3;3	2	3	3	3	2	0	3	3	3	1	3	3	3	2	1	1	3	2	2	1	2	0	0	0	0	0	2	0	2	1	2	0	0	0	1	2	0	2	0	2	2	0	2
SF3A3	Q12874	Splicing factor 3A subunit 3 OS=Homo sapiens GN=SF3A3 PE=1 SV=1	Splicing factor 3A subunit 3	4	4	4	1	4	4	4	0	0	2	1	1	0	1	0	4	3	1	0	0	0	0	0	0	0	0	0	0	0	0	0	0	0	0	1	0	0	1	0	0	0	0	0	0	0	0
SF3B1	O75533	Splicing factor 3B subunit 1 OS=Homo sapiens GN=SF3B1 PE=1 SV=3	Splicing factor 3B subunit 1	5	5	5	1	5	5	5	1	0	3	2	3	0	2	2	5	5	0	0	0	0	0	0	0	0	0	0	0	0	0	0	1	0	0	0	0	0	0	2	0	0	0	0	0	0	0
SF3B2	Q13435	Splicing factor 3B subunit 2 OS=Homo sapiens GN=SF3B2 PE=1 SV=2	Splicing factor 3B subunit 2	2	2	2	1	2	2	2	0	0	0	0	0	0	0	0	1	1	0	0	0	0	0	0	0	0	0	0	0	0	0	0	1	0	0	0	0	0	0	0	0	0	0	0	0	0	0
SF3B3	Q15393	Splicing factor 3B subunit 3 OS=Homo sapiens GN=SF3B3 PE=1 SV=4	Splicing factor 3B subunit 3	18	18	18	1	18	18	18	7	0	14	13	12	1	15	12	18	18	2	1	3	5	3	2	0	0	0	0	0	0	1	0	3	1	1	0	0	0	1	3	0	0	0	1	0	0	0
SF3B6	Q9Y3B4	Splicing factor 3B subunit 6 OS=Homo sapiens GN=SF3B6 PE=1 SV=1	Splicing factor 3B subunit 6	2	2	2	1	2	2	2	1	0	2	2	2	0	2	2	2	2	1	1	2	0	1	0	0	0	0	0	0	0	0	0	0	0	0	0	0	0	0	1	0	0	0	0	0	0	0
SFN	P31947	14-3-3 protein sigma OS=Homo sapiens GN=SFN PE=1 SV=1	14-3-3 protein sigma	7	5	5	1	7	5	5	7	6	7	7	7	7	5	6	7	7	5	7	6	4	5	4	7	1	1	6	4	1	7	5	6	2	5	2	3	1	3	4	2	7	1	6	7	1	5
SFPQ	P23246	Splicing factor, proline- and glutamine-rich OS=Homo sapiens GN=SFPQ PE=1 SV=2	Splicing factor, proline- and glutamine-rich	8	7	7	1	8	7	7	5	0	4	4	6	3	3	2	7	4	0	1	3	1	0	1	0	0	0	2	1	0	0	1	2	1	2	0	0	0	1	1	0	1	0	1	0	0	0
SFRP1	Q8N474	Secreted frizzled-related protein 1 OS=Homo sapiens GN=SFRP1 PE=1 SV=1	Secreted frizzled-related protein 1	12	12	12	1	12	12	12	7	2	2	3	3	0	1	2	7	6	0	8	0	5	5	6	2	0	1	7	10	3	3	6	0	0	0	0	0	0	0	3	0	3	0	5	3	1	4
SFXN1	Q9H9B4	Sideroflexin-1 OS=Homo sapiens GN=SFXN1 PE=1 SV=4	Sideroflexin-1	4	4	4	1	4	4	4	2	0	0	0	2	0	2	3	4	3	0	2	1	0	1	1	0	0	0	0	0	0	2	0	0	0	0	1	0	0	0	0	1	1	0	0	0	0	0
SGSH	P51688	N-sulphoglucosamine sulphohydrolase OS=Homo sapiens GN=SGSH PE=1 SV=1	N-sulphoglucosamine sulphohydrolase	2	2	2	1	2	2	2	0	1	2	1	2	1	1	2	2	1	0	1	1	1	2	1	0	0	0	0	0	0	1	1	1	1	1	0	0	0	1	0	0	0	0	1	1	0	1
SGTA	O43765	Small glutamine-rich tetratricopeptide repeat-containing protein alpha OS=Homo sapiens GN=SGTA PE=1 SV=1	Small glutamine-rich tetratricopeptide repeat-containing protein alpha	4	4	4	1	4	4	4	3	0	4	4	4	3	3	4	4	3	0	2	2	4	4	2	1	0	0	0	0	0	1	0	2	0	1	0	0	0	0	0	0	0	0	0	0	0	0
SH3BGRL	O75368	SH3 domain-binding glutamic acid-rich-like protein OS=Homo sapiens GN=SH3BGRL PE=1 SV=1	SH3 domain-binding glutamic acid-rich-like protein	3	3	3	1	3	3	3	3	0	3	3	3	2	2	2	2	2	0	3	2	2	3	3	0	0	0	0	0	0	1	0	1	0	1	0	0	0	0	0	0	2	0	2	2	0	2
SH3BGRL3	Q9H299	SH3 domain-binding glutamic acid-rich-like protein 3 OS=Homo sapiens GN=SH3BGRL3 PE=1 SV=1	SH3 domain-binding glutamic acid-rich-like protein 3	3	3	3	1	3	3	3	3	0	3	3	3	2	3	0	3	3	2	3	2	3	3	3	1	1	1	0	1	0	3	1	2	1	1	1	1	0	0	1	1	2	1	1	2	1	1
SH3BP4	Q9P0V3	SH3 domain-binding protein 4 OS=Homo sapiens GN=SH3BP4 PE=1 SV=1	SH3 domain-binding protein 4	8	8	8	1	8	8	8	7	0	1	3	2	0	0	0	0	0	0	5	0	8	7	1	0	0	0	1	1	0	1	0	1	0	0	0	0	1	0	2	0	1	0	3	1	0	0
SH3GL1	Q99961	Endophilin-A2 OS=Homo sapiens GN=SH3GL1 PE=1 SV=1	Endophilin-A2	3;1	3;1	3;1	2	3	3	3	2	0	2	2	1	0	1	1	2	2	0	1	0	1	1	1	0	0	1	1	0	0	1	0	0	0	0	0	0	0	0	1	0	0	0	1	1	0	1
SHMT1	P34896	Serine hydroxymethyltransferase, cytosolic OS=Homo sapiens GN=SHMT1 PE=1 SV=1	Serine hydroxymethyltransferase, cytosolic	3	2	2	1	3	2	2	1	0	2	2	2	0	1	2	3	1	0	0	1	0	0	0	0	0	0	0	0	0	0	0	0	0	0	0	0	0	1	0	0	0	0	0	0	0	0
SHMT2	P34897	Serine hydroxymethyltransferase, mitochondrial OS=Homo sapiens GN=SHMT2 PE=1 SV=3	Serine hydroxymethyltransferase, mitochondrial	8	8	7	1	8	8	7	4	0	4	4	3	0	6	6	8	6	1	3	3	3	4	4	0	0	0	0	0	0	2	1	1	1	1	0	0	1	3	4	1	2	0	0	0	0	0
SKP1	P63208	S-phase kinase-associated protein 1 OS=Homo sapiens GN=SKP1 PE=1 SV=2	S-phase kinase-associated protein 1	3	3	3	1	3	3	3	3	0	3	3	3	1	3	3	3	3	2	3	2	3	3	2	2	0	0	0	0	0	3	0	1	0	1	0	0	0	0	2	0	1	0	3	1	0	2
SLC12A4	Q9UP95	Solute carrier family 12 member 4 OS=Homo sapiens GN=SLC12A4 PE=1 SV=2;Solute carrier family 12 member 6 OS=Homo sapiens GN=SLC12A6 PE=1 SV=2	Solute carrier family 12 member 4;Solute carrier family 12 member 6	5;3;1	5;3;1	5;3;1	3	5	5	5	5	0	4	4	5	3	4	4	4	4	0	5	0	4	4	4	3	0	0	2	0	0	4	0	2	1	2	0	0	0	1	1	0	4	0	3	2	0	0
SLC12A7	Q9Y666	Solute carrier family 12 member 7 OS=Homo sapiens GN=SLC12A7 PE=1 SV=3	Solute carrier family 12 member 7	2	2	2	1	2	2	2	0	0	0	0	0	0	0	0	0	0	0	0	0	0	0	0	0	0	0	0	0	0	0	0	0	0	1	0	0	0	0	0	0	0	0	0	0	0	0
SLC16A1	P53985	Monocarboxylate transporter 1 OS=Homo sapiens GN=SLC16A1 PE=1 SV=3	Monocarboxylate transporter 1	2	2	2	1	2	2	2	2	0	2	2	2	2	2	2	2	2	0	2	1	1	2	1	1	0	0	1	0	0	2	0	1	0	0	0	0	0	0	1	0	1	0	2	2	0	2
SLC16A3	O15427	Monocarboxylate transporter 4 OS=Homo sapiens GN=SLC16A3 PE=1 SV=1	Monocarboxylate transporter 4	7	7	7	1	7	7	7	7	0	7	7	7	2	6	4	3	3	0	7	3	4	5	4	2	0	0	1	0	0	3	0	3	1	2	0	0	0	0	1	0	3	0	3	1	0	0
SLC1A4	P43007	Neutral amino acid transporter A OS=Homo sapiens GN=SLC1A4 PE=1 SV=1	Neutral amino acid transporter A	6	6	6	1	6	6	6	5	0	5	6	6	4	5	3	4	4	0	4	1	3	4	2	0	0	0	0	0	0	3	0	4	1	3	0	0	0	1	1	0	2	0	3	3	0	1
SLC1A5	Q15758	Neutral amino acid transporter B(0) OS=Homo sapiens GN=SLC1A5 PE=1 SV=2	Neutral amino acid transporter B(0)	13	13	13	1	13	13	13	10	1	10	10	10	5	10	7	7	8	2	10	5	9	9	8	1	0	0	2	0	0	9	1	5	6	5	2	0	0	2	3	0	7	1	8	7	0	3
SLC25A3	Q00325	Phosphate carrier protein, mitochondrial OS=Homo sapiens GN=SLC25A3 PE=1 SV=2	Phosphate carrier protein, mitochondrial	4	4	4	1	4	4	4	4	1	1	0	2	1	4	3	4	4	0	1	0	1	2	2	0	0	0	1	1	0	1	0	1	0	0	0	0	0	0	1	0	1	0	1	1	0	1
SLC25A5	P05141	ADP/ATP translocase 2 OS=Homo sapiens GN=SLC25A5 PE=1 SV=7;ADP/ATP translocase 1 OS=Homo sapiens GN=SLC25A4 PE=1 SV=4	ADP/ATP translocase 2;ADP/ATP translocase 2, N-terminally processed;ADP/ATP translocase 1	8;4;2	8;4;2	3;0;0	3	8	8	3	5	0	5	4	4	1	7	6	8	7	2	5	2	6	4	5	2	0	1	1	0	0	5	2	2	0	1	0	0	0	0	2	0	5	0	2	2	0	2
SLC26A6	Q9BXS9	Solute carrier family 26 member 6 OS=Homo sapiens GN=SLC26A6 PE=1 SV=1	Solute carrier family 26 member 6	2	2	2	1	2	2	2	1	0	2	2	2	0	2	0	0	1	0	1	0	1	1	0	0	0	0	0	1	0	0	0	0	0	0	0	0	0	0	0	0	0	0	0	0	0	0
SLC29A1	Q99808	Equilibrative nucleoside transporter 1 OS=Homo sapiens GN=SLC29A1 PE=1 SV=3	Equilibrative nucleoside transporter 1	2	2	2	1	2	2	2	1	0	1	1	1	1	1	1	1	1	0	1	0	0	0	0	0	0	0	1	0	0	1	0	1	0	1	0	0	0	0	0	0	0	0	2	2	0	0
SLC2A1	P11166	Solute carrier family 2, facilitated glucose transporter member 1 OS=Homo sapiens GN=SLC2A1 PE=1 SV=2	Solute carrier family 2, facilitated glucose transporter member 1	6	6	6	1	6	6	6	5	1	4	4	4	3	4	4	4	3	1	5	3	4	4	4	3	1	1	2	0	0	5	0	2	1	2	1	0	0	0	1	0	5	0	2	2	0	1
SLC2A3	P11169	Solute carrier family 2, facilitated glucose transporter member 3 OS=Homo sapiens GN=SLC2A3 PE=1 SV=1;Solute carrier family 2, facilitated glucose transporter member 14 OS=Homo sapiens GN=SLC2A14 PE=2 SV=1	Solute carrier family 2, facilitated glucose transporter member 3;Solute carrier family 2, facilitated glucose transporter member 14	5;4	5;4	5;4	2	5	5	5	4	0	4	3	4	1	0	3	4	3	0	3	1	5	5	3	2	0	0	2	1	1	3	0	2	0	2	1	0	0	1	3	0	2	0	3	3	0	3
SLC31A1	O15431	High affinity copper uptake protein 1 OS=Homo sapiens GN=SLC31A1 PE=1 SV=1	High affinity copper uptake protein 1	2	2	2	1	2	2	2	2	0	2	2	2	2	2	2	1	1	0	1	1	1	1	2	1	0	0	0	0	0	2	0	2	0	2	0	0	0	0	0	0	0	0	1	2	0	1
SLC35B2	Q8TB61	Adenosine 3-phospho 5-phosphosulfate transporter 1 OS=Homo sapiens GN=SLC35B2 PE=1 SV=1	Adenosine 3-phospho 5-phosphosulfate transporter 1	3	3	3	1	3	3	3	1	0	2	2	3	2	2	3	2	3	0	1	0	0	0	0	0	0	0	0	0	0	0	0	1	0	1	0	0	0	0	0	0	0	0	0	0	0	0
SLC38A1	Q9H2H9	Sodium-coupled neutral amino acid transporter 1 OS=Homo sapiens GN=SLC38A1 PE=1 SV=1	Sodium-coupled neutral amino acid transporter 1	4	4	4	1	4	4	4	4	0	3	3	4	3	3	4	3	2	0	4	2	3	4	4	1	0	1	0	0	0	4	0	1	0	1	0	0	0	0	1	1	1	0	1	1	0	1
SLC38A2	Q96QD8	Sodium-coupled neutral amino acid transporter 2 OS=Homo sapiens GN=SLC38A2 PE=1 SV=2	Sodium-coupled neutral amino acid transporter 2	6	6	6	1	6	6	6	6	0	5	6	6	0	5	4	6	5	1	6	3	4	5	5	3	0	0	4	0	0	5	1	0	0	0	0	0	0	0	1	0	4	0	5	5	0	5
SLC38A5	Q8WUX1	Sodium-coupled neutral amino acid transporter 5 OS=Homo sapiens GN=SLC38A5 PE=1 SV=1	Sodium-coupled neutral amino acid transporter 5	3	3	3	1	3	3	3	3	1	1	2	2	1	1	2	1	0	0	3	1	2	2	2	1	0	0	0	1	0	1	0	1	1	1	0	1	1	0	0	0	1	0	1	1	0	1
SLC39A10	Q9ULF5	Zinc transporter ZIP10 OS=Homo sapiens GN=SLC39A10 PE=1 SV=2	Zinc transporter ZIP10	2	2	2	1	2	2	2	2	0	2	2	2	0	2	2	2	2	0	2	1	2	2	2	0	0	0	0	0	0	2	0	0	0	0	0	0	0	0	0	0	2	0	1	1	0	1
SLC39A14	Q15043	Zinc transporter ZIP14 OS=Homo sapiens GN=SLC39A14 PE=1 SV=3	Zinc transporter ZIP14	2	2	2	1	2	2	2	2	0	2	2	1	0	0	1	1	1	0	2	0	2	2	1	0	0	0	0	0	0	2	0	0	0	0	0	0	0	0	0	0	1	0	1	2	0	2
SLC3A2	P08195	4F2 cell-surface antigen heavy chain OS=Homo sapiens GN=SLC3A2 PE=1 SV=3	4F2 cell-surface antigen heavy chain	21	21	21	1	21	21	21	20	2	21	21	21	9	20	17	18	21	4	18	14	16	18	14	9	1	0	5	1	0	17	1	11	7	11	3	1	0	2	10	0	15	0	14	14	3	10
SLC44A1	Q8WWI5	Choline transporter-like protein 1 OS=Homo sapiens GN=SLC44A1 PE=1 SV=1	Choline transporter-like protein 1	5	5	5	1	5	5	5	5	0	3	3	4	1	0	1	0	0	0	5	0	5	5	3	0	0	0	2	0	0	4	0	1	0	1	0	0	0	0	0	0	0	0	0	1	0	1
SLC44A2	Q8IWA5	Choline transporter-like protein 2 OS=Homo sapiens GN=SLC44A2 PE=1 SV=3	Choline transporter-like protein 2	8	8	8	1	8	8	8	7	0	7	6	7	3	4	2	4	3	0	7	0	6	5	4	2	0	0	2	1	0	5	0	3	1	2	0	0	0	0	1	0	4	0	5	4	0	2
SLC4A2	P04920	Anion exchange protein 2 OS=Homo sapiens GN=SLC4A2 PE=1 SV=4	Anion exchange protein 2	6	6	6	1	6	6	6	2	0	6	3	5	1	2	0	4	3	0	2	0	1	1	0	0	0	0	0	0	0	1	0	1	0	0	0	0	0	0	0	0	0	0	0	0	0	0
SLC4A7	Q9Y6M7	Sodium bicarbonate cotransporter 3 OS=Homo sapiens GN=SLC4A7 PE=1 SV=2	Sodium bicarbonate cotransporter 3	2	2	2	1	2	2	2	2	0	2	2	2	0	2	1	2	2	0	2	0	2	2	1	0	0	0	0	0	0	2	0	0	0	0	0	0	0	0	0	0	0	0	0	0	0	0
SLC5A3	P53794	Sodium/myo-inositol cotransporter OS=Homo sapiens GN=SLC5A3 PE=3 SV=2	Sodium/myo-inositol cotransporter	2	2	2	1	2	2	2	0	0	1	1	1	0	0	0	0	0	0	0	0	0	2	0	0	0	0	0	0	0	2	0	0	0	0	0	0	0	0	0	0	1	0	0	0	0	0
SLC6A15	Q9H2J7	Sodium-dependent neutral amino acid transporter B(0)AT2 OS=Homo sapiens GN=SLC6A15 PE=1 SV=1	Sodium-dependent neutral amino acid transporter B(0)AT2	2	2	2	1	2	2	2	2	0	2	2	2	0	2	1	1	2	0	2	0	1	2	2	0	0	0	0	0	0	1	0	0	0	0	0	0	0	0	0	0	1	0	0	0	0	0
SLC7A1	P30825	High affinity cationic amino acid transporter 1 OS=Homo sapiens GN=SLC7A1 PE=1 SV=1;Cationic amino acid transporter 2 OS=Homo sapiens GN=SLC7A2 PE=1 SV=2	High affinity cationic amino acid transporter 1;Cationic amino acid transporter 2	2;1	2;1	2;1	2	2	2	2	2	0	2	2	2	1	2	2	2	2	0	2	2	2	2	2	0	0	0	0	0	0	2	0	1	1	1	1	0	0	0	0	0	2	0	1	1	0	1
SLC7A5	Q01650	Large neutral amino acids transporter small subunit 1 OS=Homo sapiens GN=SLC7A5 PE=1 SV=2	Large neutral amino acids transporter small subunit 1	3	3	3	1	3	3	3	2	0	3	3	3	2	2	2	2	3	0	3	1	2	2	0	1	0	0	3	0	0	3	0	3	1	3	2	1	0	1	1	0	1	0	3	3	0	1
SLC9A1	P19634	Sodium/hydrogen exchanger 1 OS=Homo sapiens GN=SLC9A1 PE=1 SV=2;Sodium/hydrogen exchanger 2 OS=Homo sapiens GN=SLC9A2 PE=2 SV=1	Sodium/hydrogen exchanger 1;Sodium/hydrogen exchanger 2	2;1	2;1	2;1	2	2	2	2	1	0	1	1	1	0	0	1	0	0	0	1	0	1	1	1	0	0	0	0	0	0	1	0	0	0	0	0	0	0	0	0	0	1	0	0	0	0	0
SLC9A3R1	O14745	Na(+)/H(+) exchange regulatory cofactor NHE-RF1 OS=Homo sapiens GN=SLC9A3R1 PE=1 SV=4	Na(+)/H(+) exchange regulatory cofactor NHE-RF1	11	11	11	1	11	11	11	3	0	10	9	9	3	6	3	4	4	1	3	2	4	3	2	2	0	0	0	0	1	1	0	6	4	3	1	1	0	0	0	0	1	0	0	2	0	1
SLC9A3R2	Q15599	Na(+)/H(+) exchange regulatory cofactor NHE-RF2 OS=Homo sapiens GN=SLC9A3R2 PE=1 SV=2	Na(+)/H(+) exchange regulatory cofactor NHE-RF2	3	3	3	1	3	3	3	2	0	2	2	2	1	1	1	0	0	0	1	0	2	2	2	0	0	0	0	0	0	1	1	2	1	1	0	0	0	0	0	0	0	0	1	1	0	1
SLK	Q9H2G2	STE20-like serine/threonine-protein kinase OS=Homo sapiens GN=SLK PE=1 SV=1	STE20-like serine/threonine-protein kinase	3	3	2	1	3	3	2	2	0	1	3	3	1	2	1	2	2	0	1	0	2	2	2	0	0	0	0	1	0	2	0	1	0	1	0	0	0	1	0	0	1	0	2	2	0	0
SMARCA5	O60264	SWI/SNF-related matrix-associated actin-dependent regulator of chromatin subfamily A member 5 OS=Homo sapiens GN=SMARCA5 PE=1 SV=1	SWI/SNF-related matrix-associated actin-dependent regulator of chromatin subfamily A member 5	3;1	3;1	3;1	2	3	3	3	0	0	0	0	0	0	0	0	3	3	0	0	0	0	0	0	0	0	0	0	0	0	0	0	0	0	0	0	0	0	0	0	0	0	0	0	0	0	0
SMARCB1	Q12824	SWI/SNF-related matrix-associated actin-dependent regulator of chromatin subfamily B member 1 OS=Homo sapiens GN=SMARCB1 PE=1 SV=2	SWI/SNF-related matrix-associated actin-dependent regulator of chromatin subfamily B member 1	2	2	2	1	2	2	2	0	0	0	1	1	0	1	1	2	2	0	0	0	0	0	0	0	0	0	0	0	0	0	0	0	0	0	0	0	0	0	0	0	0	0	0	0	0	0
SMARCC2	Q8TAQ2	SWI/SNF complex subunit SMARCC2 OS=Homo sapiens GN=SMARCC2 PE=1 SV=1	SWI/SNF complex subunit SMARCC2	7;3	7;3	7;3	2	7	7	7	0	0	4	3	4	0	4	1	4	3	0	0	0	0	0	0	0	0	0	1	1	0	0	0	1	0	0	0	0	0	0	1	0	0	0	1	2	0	0
SMARCE1	Q969G3	SWI/SNF-related matrix-associated actin-dependent regulator of chromatin subfamily E member 1 OS=Homo sapiens GN=SMARCE1 PE=1 SV=2	SWI/SNF-related matrix-associated actin-dependent regulator of chromatin subfamily E member 1	2	2	2	1	2	2	2	0	0	1	1	1	0	1	1	1	1	0	0	0	0	0	0	0	0	0	0	0	0	0	0	1	0	0	0	0	0	0	2	0	0	0	0	0	0	0
SMC1A	Q14683	Structural maintenance of chromosomes protein 1A OS=Homo sapiens GN=SMC1A PE=1 SV=2	Structural maintenance of chromosomes protein 1A	2	2	2	1	2	2	2	0	0	1	1	1	0	1	0	1	2	0	0	0	0	0	0	0	0	0	1	0	0	0	0	0	0	0	0	0	0	0	0	0	0	0	0	0	0	0
SMC2	O95347	Structural maintenance of chromosomes protein 2 OS=Homo sapiens GN=SMC2 PE=1 SV=2	Structural maintenance of chromosomes protein 2	9	9	9	1	9	9	9	1	0	2	3	1	0	1	2	9	6	0	0	0	1	1	0	0	0	0	0	0	0	0	0	0	0	0	0	0	0	0	1	0	0	0	0	0	0	0
SMC3	Q9UQE7	Structural maintenance of chromosomes protein 3 OS=Homo sapiens GN=SMC3 PE=1 SV=2	Structural maintenance of chromosomes protein 3	21	21	21	1	21	21	21	1	0	13	14	14	3	10	8	15	14	1	0	2	0	0	1	1	0	0	0	1	0	0	0	6	0	5	0	0	0	1	5	1	0	0	0	0	0	0
SMC4	Q9NTJ3	Structural maintenance of chromosomes protein 4 OS=Homo sapiens GN=SMC4 PE=1 SV=2	Structural maintenance of chromosomes protein 4	2	2	2	1	2	2	2	0	0	1	2	2	0	1	1	1	1	0	0	0	1	0	0	0	0	0	0	0	0	0	0	0	0	0	0	0	0	0	1	0	0	0	0	0	0	0
SMPDL3B	Q92485	Acid sphingomyelinase-like phosphodiesterase 3b OS=Homo sapiens GN=SMPDL3B PE=2 SV=2	Acid sphingomyelinase-like phosphodiesterase 3b	2	2	2	1	2	2	2	0	0	1	1	1	0	1	0	1	1	0	0	1	0	0	0	0	0	0	0	0	1	0	0	0	0	0	0	0	0	0	0	0	0	0	0	0	0	0
SMR3B	P02814	Submaxillary gland androgen-regulated protein 3B OS=Homo sapiens GN=SMR3B PE=1 SV=2	Submaxillary gland androgen-regulated protein 3B;Peptide P-A;Peptide D1A	2	2	2	1	2	2	2	0	1	1	1	0	1	1	0	0	1	1	1	0	0	1	1	1	1	2	1	1	1	0	0	1	1	1	1	1	0	1	0	1	1	0	0	0	0	1
SMS	P52788	Spermine synthase OS=Homo sapiens GN=SMS PE=1 SV=2	Spermine synthase	4	4	4	1	4	4	4	2	0	3	1	1	0	2	2	4	3	0	2	1	3	2	2	0	0	0	0	0	0	2	0	0	0	0	0	0	0	0	1	0	0	0	0	0	0	0
SMU1	Q2TAY7	WD40 repeat-containing protein SMU1 OS=Homo sapiens GN=SMU1 PE=1 SV=2	WD40 repeat-containing protein SMU1;WD40 repeat-containing protein SMU1, N-terminally processed	2	2	2	1	2	2	2	2	0	2	2	2	0	2	1	2	2	1	1	1	1	1	1	0	0	0	0	0	0	1	1	1	0	0	0	0	0	0	0	0	0	0	0	0	0	0
SNAP23	O00161	Synaptosomal-associated protein 23 OS=Homo sapiens GN=SNAP23 PE=1 SV=1	Synaptosomal-associated protein 23	9	9	9	1	9	9	9	8	0	7	8	7	5	7	6	6	7	1	8	2	6	6	5	4	0	0	2	0	0	8	0	5	2	5	1	0	0	0	3	0	7	0	6	6	0	4
SNAP29	O95721	Synaptosomal-associated protein 29 OS=Homo sapiens GN=SNAP29 PE=1 SV=1	Synaptosomal-associated protein 29	4	4	4	1	4	4	4	3	1	3	3	3	3	3	2	3	3	1	3	1	3	2	2	1	0	0	0	1	0	2	1	2	0	3	0	0	0	0	2	0	2	0	1	2	0	0
SND1	Q7KZF4	Staphylococcal nuclease domain-containing protein 1 OS=Homo sapiens GN=SND1 PE=1 SV=1	Staphylococcal nuclease domain-containing protein 1	21	21	21	1	21	21	21	14	0	18	15	15	2	15	13	19	15	1	12	10	13	13	7	0	0	0	4	0	1	4	1	7	0	5	0	0	0	0	4	0	5	0	8	5	0	3
SNRNP200	O75643	U5 small nuclear ribonucleoprotein 200 kDa helicase OS=Homo sapiens GN=SNRNP200 PE=1 SV=2	U5 small nuclear ribonucleoprotein 200 kDa helicase	18	18	18	1	18	18	18	1	0	6	6	9	0	4	6	18	12	0	2	0	3	3	1	0	0	0	1	0	0	0	0	0	0	0	0	0	0	0	5	0	1	0	1	0	0	0
SNRNP40	Q96DI7	U5 small nuclear ribonucleoprotein 40 kDa protein OS=Homo sapiens GN=SNRNP40 PE=1 SV=1	U5 small nuclear ribonucleoprotein 40 kDa protein	2	2	2	1	2	2	2	0	0	1	0	0	0	0	0	2	1	0	0	0	0	0	0	0	0	0	0	0	0	0	0	1	0	0	0	0	0	0	0	0	0	0	0	0	0	0
SNRNP70	P08621	U1 small nuclear ribonucleoprotein 70 kDa OS=Homo sapiens GN=SNRNP70 PE=1 SV=2	U1 small nuclear ribonucleoprotein 70 kDa	7	7	7	1	7	7	7	1	0	5	3	3	0	3	5	6	5	0	0	0	1	1	0	0	0	0	0	0	1	0	0	1	0	0	1	0	0	2	2	0	0	1	2	0	0	0
SNRPD1	P62314	Small nuclear ribonucleoprotein Sm D1 OS=Homo sapiens GN=SNRPD1 PE=1 SV=1	Small nuclear ribonucleoprotein Sm D1	3	3	3	1	3	3	3	2	0	2	2	3	0	3	2	3	2	0	0	0	0	0	0	1	0	0	0	0	0	1	0	0	0	0	0	0	0	0	0	0	1	0	0	0	0	0
SNRPD2	P62316	Small nuclear ribonucleoprotein Sm D2 OS=Homo sapiens GN=SNRPD2 PE=1 SV=1	Small nuclear ribonucleoprotein Sm D2	3	3	3	1	3	3	3	0	0	3	2	1	1	1	1	3	2	0	0	0	1	0	0	0	0	0	0	0	0	0	0	2	0	0	0	0	0	0	2	0	0	0	1	0	0	0
SNRPD3	P62318	Small nuclear ribonucleoprotein Sm D3 OS=Homo sapiens GN=SNRPD3 PE=1 SV=1	Small nuclear ribonucleoprotein Sm D3	4	4	4	1	4	4	4	1	0	2	1	1	1	3	3	4	3	1	1	1	1	1	2	1	1	0	0	0	0	2	0	1	0	0	0	1	0	0	2	0	2	0	1	1	0	0
SNRPG	P62308	Small nuclear ribonucleoprotein G OS=Homo sapiens GN=SNRPG PE=1 SV=1;Putative small nuclear ribonucleoprotein G-like protein 15 OS=Homo sapiens GN=SNRPGP15 PE=5 SV=2	Small nuclear ribonucleoprotein G;Putative small nuclear ribonucleoprotein G-like protein 15	3;3	3;3	3;3	2	3	3	3	0	0	3	2	2	2	2	2	3	3	1	0	1	2	1	3	0	0	0	0	0	0	2	1	0	1	1	0	0	0	1	1	0	1	0	1	0	0	1
SNRPN	P63162	Small nuclear ribonucleoprotein-associated protein N OS=Homo sapiens GN=SNRPN PE=1 SV=1;Small nuclear ribonucleoprotein-associated proteins B and B OS=Homo sapiens GN=SNRPB PE=1 SV=2	Small nuclear ribonucleoprotein-associated protein N;Small nuclear ribonucleoprotein-associated proteins B and B	2;2	2;2	2;2	2	2	2	2	1	0	2	1	0	1	2	1	2	2	0	0	0	0	1	0	0	0	0	0	0	0	0	0	1	1	1	0	0	0	0	0	0	0	0	0	0	0	0
SNTB2	Q13425	Beta-2-syntrophin OS=Homo sapiens GN=SNTB2 PE=1 SV=1	Beta-2-syntrophin	7;1	7;1	7;1	2	7	7	7	5	0	5	5	5	1	3	2	5	3	0	5	0	5	5	2	0	0	0	0	0	0	1	0	2	0	3	0	0	0	1	2	1	0	0	4	3	0	1
SNX1	Q13596	Sorting nexin-1 OS=Homo sapiens GN=SNX1 PE=1 SV=3	Sorting nexin-1	4	3	3	1	4	3	3	2	0	3	3	4	1	4	4	4	4	1	3	1	2	3	3	2	0	1	3	1	0	3	0	2	0	0	0	0	0	0	1	1	2	0	2	3	0	2
SNX2	O60749	Sorting nexin-2 OS=Homo sapiens GN=SNX2 PE=1 SV=2	Sorting nexin-2	9	9	8	1	9	9	8	5	1	7	7	7	5	6	5	6	4	1	4	2	4	4	2	1	0	0	5	0	0	2	0	3	0	3	0	0	0	0	2	0	0	0	5	6	0	4
SNX3	O60493	Sorting nexin-3 OS=Homo sapiens GN=SNX3 PE=1 SV=3	Sorting nexin-3	3;1	3;1	3;1	2	3	3	3	3	0	3	3	3	2	3	3	3	3	0	3	1	3	3	2	1	1	0	1	0	0	3	0	2	0	1	0	0	0	0	2	0	0	0	1	1	1	1
SNX6	Q9UNH7	Sorting nexin-6 OS=Homo sapiens GN=SNX6 PE=1 SV=1	Sorting nexin-6;Sorting nexin-6, N-terminally processed	5	5	5	1	5	5	5	2	0	1	2	1	0	2	0	5	2	0	2	0	1	1	2	0	0	0	0	0	1	0	0	1	0	0	0	0	0	0	1	0	0	0	1	1	0	0
SNX8	Q9Y5X2	Sorting nexin-8 OS=Homo sapiens GN=SNX8 PE=1 SV=1	Sorting nexin-8	3	3	3	1	3	3	3	2	0	2	2	1	1	1	2	3	3	0	1	0	2	2	1	0	0	0	0	0	0	0	0	1	0	0	0	0	0	0	0	0	0	0	0	0	0	0
SNX9	Q9Y5X1	Sorting nexin-9 OS=Homo sapiens GN=SNX9 PE=1 SV=1	Sorting nexin-9	4	4	4	1	4	4	4	3	1	3	3	3	1	3	2	1	3	1	3	0	2	3	3	0	0	0	0	0	0	2	0	1	0	0	0	0	0	1	0	0	1	0	2	3	0	1
SOD1	P00441	Superoxide dismutase [Cu-Zn] OS=Homo sapiens GN=SOD1 PE=1 SV=2	Superoxide dismutase [Cu-Zn]	5	5	5	1	5	5	5	2	2	2	3	3	3	3	3	3	3	2	2	2	3	3	3	1	1	1	2	1	0	2	3	2	2	2	1	0	0	2	1	1	3	0	2	0	0	2
SOD2	P04179	Superoxide dismutase [Mn], mitochondrial OS=Homo sapiens GN=SOD2 PE=1 SV=2	Superoxide dismutase [Mn], mitochondrial	2	2	2	1	2	2	2	2	0	2	2	2	1	2	2	2	2	1	2	1	2	2	2	2	0	0	2	0	0	2	1	1	0	1	0	0	0	0	1	0	2	0	1	1	1	1
SORD	Q00796	Sorbitol dehydrogenase OS=Homo sapiens GN=SORD PE=1 SV=4	Sorbitol dehydrogenase	3	3	3	1	3	3	3	1	0	2	2	2	1	2	3	2	1	0	1	1	2	1	1	0	0	0	1	0	0	1	0	1	0	1	0	0	0	0	1	0	1	0	0	1	0	0
SPAG9	O60271	C-Jun-amino-terminal kinase-interacting protein 4 OS=Homo sapiens GN=SPAG9 PE=1 SV=4	C-Jun-amino-terminal kinase-interacting protein 4	6	6	6	1	6	6	6	1	0	4	4	4	0	1	1	3	3	0	1	1	1	2	0	0	1	0	0	0	1	0	0	0	0	1	0	0	1	0	2	1	0	0	4	1	1	0
SPATA5	Q8NB90	Spermatogenesis-associated protein 5 OS=Homo sapiens GN=SPATA5 PE=1 SV=3	Spermatogenesis-associated protein 5	3	2	2	1	3	2	2	1	0	1	1	1	1	1	1	3	3	1	1	1	1	1	1	0	0	0	1	0	0	1	0	1	1	1	1	0	0	1	1	0	0	0	1	1	0	1
SPCS2	Q15005	Signal peptidase complex subunit 2 OS=Homo sapiens GN=SPCS2 PE=1 SV=3	Signal peptidase complex subunit 2	4	4	4	1	4	4	4	3	0	2	3	3	1	3	3	3	1	0	2	1	2	2	1	1	0	0	0	0	0	2	0	1	0	1	0	0	0	0	0	0	1	0	0	0	0	0
SPCS3	P61009	Signal peptidase complex subunit 3 OS=Homo sapiens GN=SPCS3 PE=1 SV=1	Signal peptidase complex subunit 3	4	4	4	1	4	4	4	4	0	4	4	4	2	4	4	4	4	1	3	2	2	3	1	0	0	0	0	0	0	3	1	2	1	1	0	0	0	0	1	0	1	0	1	0	0	0
SPG11	Q96JI7	Spatacsin OS=Homo sapiens GN=SPG11 PE=1 SV=3	Spatacsin	2	2	2	1	2	2	2	1	0	1	1	1	0	1	1	1	1	0	1	1	1	1	1	0	0	0	0	0	0	1	0	1	0	1	0	0	0	0	0	0	0	0	0	1	0	0
SPR	P35270	Sepiapterin reductase OS=Homo sapiens GN=SPR PE=1 SV=1	Sepiapterin reductase	2	2	2	1	2	2	2	2	0	2	2	2	0	2	0	2	2	0	1	0	1	2	0	0	0	0	0	0	0	0	0	0	0	0	0	0	0	0	0	0	0	0	0	0	0	0
SPRR3	Q9UBC9	Small proline-rich protein 3 OS=Homo sapiens GN=SPRR3 PE=1 SV=2	Small proline-rich protein 3	2	2	2	1	2	2	2	0	0	0	0	1	0	0	0	0	0	0	0	0	0	0	1	1	1	0	0	0	0	0	1	0	0	0	0	0	0	0	0	0	0	0	0	0	0	1
SPRYD7	Q5W111	SPRY domain-containing protein 7 OS=Homo sapiens GN=SPRYD7 PE=1 SV=2	SPRY domain-containing protein 7	4	4	4	1	4	4	4	3	0	4	4	3	1	4	4	4	4	0	2	0	2	2	1	0	0	0	1	0	0	0	0	1	0	1	0	0	0	0	2	0	0	0	2	0	0	0
SPTAN1	Q13813	Spectrin alpha chain, non-erythrocytic 1 OS=Homo sapiens GN=SPTAN1 PE=1 SV=3	Spectrin alpha chain, non-erythrocytic 1	40	40	40	1	40	40	40	26	0	35	32	36	13	30	24	29	29	4	24	11	17	19	11	2	0	1	1	0	1	12	1	13	2	9	0	0	2	0	7	1	2	0	10	7	1	8
SPTBN1	Q01082	Spectrin beta chain, non-erythrocytic 1 OS=Homo sapiens GN=SPTBN1 PE=1 SV=2	Spectrin beta chain, non-erythrocytic 1	30	30	29	1	30	30	29	21	0	25	22	25	8	23	18	20	17	2	18	4	15	13	7	0	1	1	3	0	0	7	0	9	3	6	1	1	0	0	10	0	2	0	10	5	0	2
SPTLC1	O15269	Serine palmitoyltransferase 1 OS=Homo sapiens GN=SPTLC1 PE=1 SV=1	Serine palmitoyltransferase 1	2	2	2	1	2	2	2	1	0	2	2	2	0	2	1	2	2	0	1	0	1	1	0	1	0	0	1	0	0	2	0	0	0	0	0	0	0	0	0	0	1	0	1	1	0	1
SQSTM1	Q13501	Sequestosome-1 OS=Homo sapiens GN=SQSTM1 PE=1 SV=1	Sequestosome-1	5	5	5	1	5	5	5	3	0	1	1	2	0	0	0	2	1	0	3	0	4	3	3	0	0	0	0	0	0	2	0	1	0	0	0	0	0	0	0	0	1	0	5	5	0	3
SRC	P12931	Proto-oncogene tyrosine-protein kinase Src OS=Homo sapiens GN=SRC PE=1 SV=3	Proto-oncogene tyrosine-protein kinase Src	7;1;1;1;1	7;1;1;1;1	3;1;1;1;1	5	7	7	3	5	1	2	2	2	1	0	2	3	1	0	5	0	5	4	5	1	0	0	2	0	0	3	0	1	0	1	0	1	0	0	2	0	2	0	3	2	0	1
SRGAP1	Q7Z6B7	SLIT-ROBO Rho GTPase-activating protein 1 OS=Homo sapiens GN=SRGAP1 PE=1 SV=1	SLIT-ROBO Rho GTPase-activating protein 1	3	2	2	1	3	2	2	1	0	2	2	1	0	1	0	0	0	0	1	0	1	1	0	0	0	0	0	0	1	0	0	0	0	1	0	0	0	0	0	0	0	0	1	1	0	0
SRGAP2	O75044	SLIT-ROBO Rho GTPase-activating protein 2 OS=Homo sapiens GN=SRGAP2 PE=1 SV=2;SLIT-ROBO Rho GTPase-activating protein 2B OS=Homo sapiens GN=SRGAP2B PE=3 SV=1;SLIT-ROBO Rho GTPase-activating protein 2C OS=Homo sapiens GN=SRGAP2C PE=1 SV=1	SLIT-ROBO Rho GTPase-activating protein 2;SLIT-ROBO Rho GTPase-activating protein 2B;SLIT-ROBO Rho GTPase-activating protein 2C	6;5;5	6;5;5	5;4;4	3	6	6	5	3	1	4	2	3	2	2	0	0	0	1	3	1	3	3	1	1	1	0	0	1	0	1	1	2	2	2	0	2	0	1	0	0	1	1	1	0	0	0
SRI	P30626	Sorcin OS=Homo sapiens GN=SRI PE=1 SV=1	Sorcin	4	4	4	1	4	4	4	4	0	4	4	3	3	4	3	3	2	1	3	2	3	4	3	1	0	0	2	2	0	3	1	2	1	3	1	0	0	1	0	0	2	0	2	3	0	0
SRM	P19623	Spermidine synthase OS=Homo sapiens GN=SRM PE=1 SV=1	Spermidine synthase	5	5	5	1	5	5	5	4	0	4	4	4	1	4	3	5	5	0	4	3	5	5	5	0	0	0	0	0	0	3	0	3	0	2	0	1	0	0	2	0	1	1	1	1	0	0
SRP14	P37108	Signal recognition particle 14 kDa protein OS=Homo sapiens GN=SRP14 PE=1 SV=2	Signal recognition particle 14 kDa protein	2	2	2	1	2	2	2	2	1	1	2	2	1	2	2	2	2	1	1	2	1	1	2	1	0	0	1	1	0	2	0	1	0	1	0	0	0	0	1	0	1	0	2	1	0	0
SRP54	P61011	Signal recognition particle 54 kDa protein OS=Homo sapiens GN=SRP54 PE=1 SV=1	Signal recognition particle 54 kDa protein	4	4	4	1	4	4	4	3	0	3	3	4	0	4	3	3	3	1	4	3	4	3	2	0	0	0	0	0	0	1	0	0	0	0	0	0	0	0	1	0	0	0	1	0	0	0
SRP68	Q9UHB9	Signal recognition particle subunit SRP68 OS=Homo sapiens GN=SRP68 PE=1 SV=2	Signal recognition particle subunit SRP68	9	9	9	1	9	9	9	4	0	9	8	9	3	5	4	9	9	0	2	0	2	5	0	0	0	0	0	0	0	0	0	5	0	6	0	0	0	1	4	0	0	0	1	0	0	0
SRP72	O76094	Signal recognition particle subunit SRP72 OS=Homo sapiens GN=SRP72 PE=1 SV=3	Signal recognition particle subunit SRP72	10	10	10	1	10	10	10	1	0	5	6	5	1	5	5	10	6	1	0	2	3	2	1	1	0	0	0	0	0	0	0	3	2	2	0	0	0	2	4	1	0	0	2	1	0	3
SRP9	P49458	Signal recognition particle 9 kDa protein OS=Homo sapiens GN=SRP9 PE=1 SV=2	Signal recognition particle 9 kDa protein	3	3	3	1	3	3	3	2	0	3	3	3	1	3	3	2	1	0	0	0	1	1	1	0	0	0	0	0	0	0	0	2	0	1	0	0	0	0	1	0	1	0	0	0	0	0
SRPR	P08240	Signal recognition particle receptor subunit alpha OS=Homo sapiens GN=SRPR PE=1 SV=2	Signal recognition particle receptor subunit alpha	3	3	3	1	3	3	3	2	0	2	2	2	0	1	2	3	2	1	2	1	2	3	3	1	0	0	0	0	0	1	0	0	0	0	0	0	0	0	0	0	0	0	0	0	0	0
SRPRB	Q9Y5M8	Signal recognition particle receptor subunit beta OS=Homo sapiens GN=SRPRB PE=1 SV=3	Signal recognition particle receptor subunit beta	3	3	3	1	3	3	3	3	0	2	2	3	0	3	3	3	3	0	3	2	2	2	2	0	0	0	0	0	0	2	0	1	0	1	0	0	0	0	0	0	2	0	1	0	0	0
SRRT	Q9BXP5	Serrate RNA effector molecule homolog OS=Homo sapiens GN=SRRT PE=1 SV=1	Serrate RNA effector molecule homolog	6	6	6	1	6	6	6	0	0	3	2	4	0	1	1	6	6	0	0	0	0	0	0	0	0	0	0	0	0	1	0	1	0	0	1	0	0	0	0	0	0	0	0	0	0	0
SRSF1	Q07955	Serine/arginine-rich splicing factor 1 OS=Homo sapiens GN=SRSF1 PE=1 SV=2	Serine/arginine-rich splicing factor 1	9	9	9	1	9	9	9	4	0	8	7	5	3	5	7	9	9	0	2	2	0	0	0	0	0	0	2	0	0	0	0	4	0	1	0	0	0	1	2	0	0	0	0	0	0	0
SRSF3	P84103	Serine/arginine-rich splicing factor 3 OS=Homo sapiens GN=SRSF3 PE=1 SV=1	Serine/arginine-rich splicing factor 3	4	3	3	1	4	3	3	2	0	3	2	1	0	3	1	4	3	0	0	2	0	0	0	0	0	0	0	0	0	0	0	0	0	0	0	0	0	0	0	0	0	0	0	0	0	0
SRSF5	Q13243	Serine/arginine-rich splicing factor 5 OS=Homo sapiens GN=SRSF5 PE=1 SV=1	Serine/arginine-rich splicing factor 5	3	2	2	1	3	2	2	0	0	3	1	1	1	1	2	3	3	0	1	2	0	0	0	0	0	0	0	0	0	1	0	0	0	0	0	0	0	1	0	0	0	0	0	0	0	0
SRSF6	Q13247	Serine/arginine-rich splicing factor 6 OS=Homo sapiens GN=SRSF6 PE=1 SV=2;Serine/arginine-rich splicing factor 4 OS=Homo sapiens GN=SRSF4 PE=1 SV=2	Serine/arginine-rich splicing factor 6;Serine/arginine-rich splicing factor 4	5;3	5;3	4;2	2	5	5	4	0	0	2	2	1	2	1	4	5	4	0	0	2	0	0	1	0	0	0	0	0	0	1	0	3	0	0	0	0	0	1	3	1	0	0	0	0	0	0
SRSF7	Q16629	Serine/arginine-rich splicing factor 7 OS=Homo sapiens GN=SRSF7 PE=1 SV=1	Serine/arginine-rich splicing factor 7	5	5	4	1	5	5	4	1	0	4	3	2	0	2	3	5	5	0	0	3	0	0	0	0	0	0	0	0	0	0	0	1	0	0	0	0	0	0	0	0	0	0	0	0	0	0
SRSF9	Q13242	Serine/arginine-rich splicing factor 9 OS=Homo sapiens GN=SRSF9 PE=1 SV=1	Serine/arginine-rich splicing factor 9	4	4	4	1	4	4	4	0	0	2	1	2	0	3	3	4	1	0	0	1	0	0	0	0	0	0	0	0	0	0	0	0	0	0	0	0	0	0	0	0	0	0	0	0	0	0
SSB	P05455	Lupus La protein OS=Homo sapiens GN=SSB PE=1 SV=2	Lupus La protein	2	2	2	1	2	2	2	2	0	2	2	2	0	2	2	2	2	1	2	2	2	2	0	0	0	0	0	0	0	1	0	1	1	1	0	0	0	0	1	0	0	0	0	0	0	1
SSBP1	Q04837	Single-stranded DNA-binding protein, mitochondrial OS=Homo sapiens GN=SSBP1 PE=1 SV=1	Single-stranded DNA-binding protein, mitochondrial	7	7	7	1	7	7	7	4	0	4	5	5	1	5	4	6	5	3	3	4	3	3	3	2	0	0	2	2	0	3	1	2	0	0	1	0	0	2	2	0	3	0	2	2	0	1
SSR1	P43307	Translocon-associated protein subunit alpha OS=Homo sapiens GN=SSR1 PE=1 SV=3	Translocon-associated protein subunit alpha	3	3	3	1	3	3	3	3	1	3	3	3	1	3	3	3	3	3	3	3	2	3	3	3	0	1	2	0	1	3	2	1	1	1	1	0	0	1	2	1	3	0	2	3	1	3
SSR4	P51571	Translocon-associated protein subunit delta OS=Homo sapiens GN=SSR4 PE=1 SV=1	Translocon-associated protein subunit delta	5	5	5	1	5	5	5	5	1	5	4	5	2	4	4	5	5	1	5	4	5	4	4	4	0	2	2	2	1	3	2	3	0	2	1	0	0	0	3	1	4	0	2	2	1	1
SSRP1	Q08945	FACT complex subunit SSRP1 OS=Homo sapiens GN=SSRP1 PE=1 SV=1	FACT complex subunit SSRP1	4	4	4	1	4	4	4	1	0	3	1	3	0	1	2	4	3	0	0	1	0	0	0	0	0	0	0	0	0	0	0	0	0	0	0	0	0	0	1	0	0	0	1	0	0	1
ST13	P50502	Hsc70-interacting protein OS=Homo sapiens GN=ST13 PE=1 SV=2;Putative protein FAM10A5 OS=Homo sapiens GN=ST13P5 PE=5 SV=1;Putative protein FAM10A4 OS=Homo sapiens GN=ST13P4 PE=5 SV=1	Hsc70-interacting protein;Putative protein FAM10A5;Putative protein FAM10A4	6;5;4	6;5;4	6;5;4	3	6	6	6	6	0	5	5	6	6	5	6	5	4	1	6	2	6	4	6	3	1	0	3	0	0	5	0	5	5	4	4	3	1	1	4	0	1	1	3	3	0	2
STAM	Q92783	Signal transducing adapter molecule 1 OS=Homo sapiens GN=STAM PE=1 SV=3	Signal transducing adapter molecule 1	5	5	4	1	5	5	4	4	1	4	2	4	1	3	2	2	2	0	5	1	4	5	5	3	0	0	3	1	0	5	0	1	0	1	0	0	0	0	1	0	5	0	1	2	0	1
STAM2	O75886	Signal transducing adapter molecule 2 OS=Homo sapiens GN=STAM2 PE=1 SV=1	Signal transducing adapter molecule 2	5	4	4	1	5	4	4	5	1	4	2	4	2	3	2	3	3	0	5	1	4	5	4	2	0	0	1	1	0	5	0	1	0	1	0	0	0	0	3	0	4	0	3	3	0	2
STAT1	P42224	Signal transducer and activator of transcription 1-alpha/beta OS=Homo sapiens GN=STAT1 PE=1 SV=2	Signal transducer and activator of transcription 1-alpha/beta	11	11	11	1	11	11	11	8	0	8	8	7	1	6	5	9	9	1	8	1	6	7	4	0	0	0	1	0	0	2	0	2	0	2	0	0	0	1	4	0	1	0	3	1	0	1
STAT3	P40763	Signal transducer and activator of transcription 3 OS=Homo sapiens GN=STAT3 PE=1 SV=2	Signal transducer and activator of transcription 3	3	3	3	1	3	3	3	2	0	2	3	2	1	2	1	3	2	0	2	0	2	2	1	0	0	0	1	0	0	0	0	1	0	0	0	0	0	0	1	0	0	0	1	0	0	1
STAU1	O95793	Double-stranded RNA-binding protein Staufen homolog 1 OS=Homo sapiens GN=STAU1 PE=1 SV=2	Double-stranded RNA-binding protein Staufen homolog 1	2	2	2	1	2	2	2	0	0	0	0	1	0	1	1	2	1	0	0	0	1	0	1	0	0	0	0	0	0	0	0	0	0	0	0	0	0	0	1	0	0	0	1	0	0	0
STIP1	P31948	Stress-induced-phosphoprotein 1 OS=Homo sapiens GN=STIP1 PE=1 SV=1	Stress-induced-phosphoprotein 1	23	23	23	1	23	23	23	13	0	15	12	14	5	12	11	13	12	2	8	7	9	11	7	1	0	0	0	0	0	6	0	8	4	10	1	1	0	3	6	1	3	0	8	6	0	3
STK24	Q9Y6E0	Serine/threonine-protein kinase 24 OS=Homo sapiens GN=STK24 PE=1 SV=1	Serine/threonine-protein kinase 24;Serine/threonine-protein kinase 24 36 kDa subunit;Serine/threonine-protein kinase 24 12 kDa subunit	3;1;1	3;1;1	3;1;1	3	3	3	3	2	0	1	2	2	1	1	1	1	0	0	2	0	2	2	1	0	0	0	0	0	0	1	0	1	1	0	0	0	0	0	0	0	0	0	0	0	0	0
STMN1	P16949	Stathmin OS=Homo sapiens GN=STMN1 PE=1 SV=3	Stathmin	5	5	4	1	5	5	4	5	1	4	4	5	3	4	2	1	3	1	5	3	5	4	5	5	0	1	0	0	0	5	0	4	3	3	2	0	0	1	1	0	4	0	4	4	0	1
STOM	P27105	Erythrocyte band 7 integral membrane protein OS=Homo sapiens GN=STOM PE=1 SV=3	Erythrocyte band 7 integral membrane protein	13	13	13	1	13	13	13	13	5	11	11	11	8	10	9	9	8	4	13	6	11	12	11	12	3	4	9	5	3	12	6	6	4	4	5	4	0	1	7	1	12	0	11	10	4	10
STOML2	Q9UJZ1	Stomatin-like protein 2, mitochondrial OS=Homo sapiens GN=STOML2 PE=1 SV=1	Stomatin-like protein 2, mitochondrial	2	2	2	1	2	2	2	1	0	0	0	1	0	1	1	1	2	0	1	0	0	0	0	0	0	0	0	0	0	1	0	0	0	0	0	0	0	0	0	0	1	0	0	0	0	0
STRAP	Q9Y3F4	Serine-threonine kinase receptor-associated protein OS=Homo sapiens GN=STRAP PE=1 SV=1	Serine-threonine kinase receptor-associated protein	11	11	11	1	11	11	11	8	0	11	10	7	4	8	7	10	8	2	8	8	7	7	5	2	0	0	3	0	0	6	1	4	0	5	1	0	0	0	6	0	3	0	5	5	0	5
STRN	O43815	Striatin OS=Homo sapiens GN=STRN PE=1 SV=4	Striatin	3	3	3	1	3	3	3	0	0	2	2	3	0	3	3	3	3	2	0	1	0	0	1	0	0	0	0	0	0	1	0	0	0	0	0	0	0	0	1	0	0	0	0	0	0	0
STRN3	Q13033	Striatin-3 OS=Homo sapiens GN=STRN3 PE=1 SV=3	Striatin-3	6	6	6	1	6	6	6	0	0	2	2	2	0	2	3	6	4	1	0	0	2	1	1	0	0	0	0	0	0	1	0	2	0	1	0	0	0	0	3	0	0	0	2	2	0	0
STT3A	P46977	Dolichyl-diphosphooligosaccharide--protein glycosyltransferase subunit STT3A OS=Homo sapiens GN=STT3A PE=1 SV=2	Dolichyl-diphosphooligosaccharide--protein glycosyltransferase subunit STT3A	7	7	7	1	7	7	7	1	0	6	6	5	2	7	7	7	6	3	3	7	3	4	5	2	0	0	0	0	0	3	1	4	1	1	1	0	0	0	2	0	3	0	2	2	0	2
STT3B	Q8TCJ2	Dolichyl-diphosphooligosaccharide--protein glycosyltransferase subunit STT3B OS=Homo sapiens GN=STT3B PE=1 SV=1	Dolichyl-diphosphooligosaccharide--protein glycosyltransferase subunit STT3B	2	2	2	1	2	2	2	1	0	1	1	1	0	1	1	2	1	0	1	0	0	0	1	0	0	0	0	0	0	1	1	0	0	0	0	0	0	0	1	0	0	0	0	0	0	0
STUB1	Q9UNE7	E3 ubiquitin-protein ligase CHIP OS=Homo sapiens GN=STUB1 PE=1 SV=2	E3 ubiquitin-protein ligase CHIP	2	2	2	1	2	2	2	1	0	1	1	1	0	0	0	2	1	0	2	0	2	2	1	0	0	0	0	0	0	2	0	1	0	0	0	0	0	0	1	0	0	0	0	0	0	0
STX12	Q86Y82	Syntaxin-12 OS=Homo sapiens GN=STX12 PE=1 SV=1	Syntaxin-12	6	6	6	1	6	6	6	4	0	4	4	4	1	4	4	4	4	2	4	4	5	5	3	1	1	0	1	0	0	3	0	1	0	1	1	0	0	0	0	0	3	0	1	1	0	0
STX16	O14662	Syntaxin-16 OS=Homo sapiens GN=STX16 PE=1 SV=3	Syntaxin-16	2	2	2	1	2	2	2	0	0	1	1	1	0	1	1	1	1	0	0	0	0	1	0	0	0	0	0	0	0	0	0	1	0	0	0	0	0	0	0	0	0	0	0	0	0	0
STX1B	P61266	Syntaxin-1B OS=Homo sapiens GN=STX1B PE=1 SV=1	Syntaxin-1B	2	2	2	1	2	2	2	0	0	0	0	0	0	0	0	0	0	0	0	0	1	2	1	0	0	0	0	0	0	0	0	0	0	0	0	0	0	0	0	0	0	0	0	0	0	0
STX3	Q13277	Syntaxin-3 OS=Homo sapiens GN=STX3 PE=1 SV=3	Syntaxin-3	9	9	9	1	9	9	9	4	0	7	7	7	6	6	7	5	6	2	5	3	6	5	3	0	0	0	0	0	0	1	1	8	5	3	3	2	0	2	3	0	0	0	4	2	0	1
STX4	Q12846	Syntaxin-4 OS=Homo sapiens GN=STX4 PE=1 SV=2	Syntaxin-4	8	8	8	1	8	8	8	6	0	7	6	7	3	7	6	7	6	1	6	1	5	4	4	1	0	0	3	0	0	3	0	5	1	3	0	0	0	0	1	0	2	0	6	6	0	2
STX7	O15400	Syntaxin-7 OS=Homo sapiens GN=STX7 PE=1 SV=4	Syntaxin-7	3	3	3	1	3	3	3	1	0	1	2	1	1	1	2	1	1	1	1	1	1	2	1	1	0	0	2	0	0	1	0	1	0	1	0	1	0	0	2	0	1	0	3	1	0	2
STXBP1	P61764	Syntaxin-binding protein 1 OS=Homo sapiens GN=STXBP1 PE=1 SV=1	Syntaxin-binding protein 1	7	7	7	1	7	7	7	3	0	4	3	3	1	5	5	6	3	0	3	2	3	3	1	2	0	0	0	0	0	4	0	1	1	0	0	0	1	0	2	0	2	0	2	3	0	3
STXBP2	Q15833	Syntaxin-binding protein 2 OS=Homo sapiens GN=STXBP2 PE=1 SV=2	Syntaxin-binding protein 2	6	6	6	1	6	6	6	2	0	3	2	3	0	2	1	2	2	0	1	0	1	0	1	1	0	0	0	0	0	0	0	0	0	0	0	0	0	0	2	0	1	0	1	1	0	0
STXBP3	O00186	Syntaxin-binding protein 3 OS=Homo sapiens GN=STXBP3 PE=1 SV=2	Syntaxin-binding protein 3	11	11	11	1	11	11	11	8	1	9	8	8	2	6	4	7	4	0	9	2	7	8	8	3	0	0	1	1	0	6	0	4	1	2	0	0	0	0	1	0	6	0	3	5	0	1
SUB1	P53999	Activated RNA polymerase II transcriptional coactivator p15 OS=Homo sapiens GN=SUB1 PE=1 SV=3	Activated RNA polymerase II transcriptional coactivator p15	3	3	3	1	3	3	3	2	0	2	1	2	0	2	2	3	3	3	1	1	0	0	0	1	0	0	0	1	0	1	0	1	0	0	0	0	1	1	2	0	1	0	0	0	1	0
SUGT1	Q9Y2Z0	Suppressor of G2 allele of SKP1 homolog OS=Homo sapiens GN=SUGT1 PE=1 SV=3	Suppressor of G2 allele of SKP1 homolog	5	5	5	1	5	5	5	4	0	3	3	3	2	3	1	5	5	0	1	1	2	2	0	0	0	0	0	0	0	0	0	2	1	2	0	0	0	1	2	0	0	0	1	1	0	0
SUMO1	P63165	Small ubiquitin-related modifier 1 OS=Homo sapiens GN=SUMO1 PE=1 SV=1	Small ubiquitin-related modifier 1	2	2	2	1	2	2	2	1	0	2	2	2	1	2	2	2	2	0	0	0	0	1	0	0	0	0	0	0	0	0	0	1	0	1	0	0	0	0	1	0	0	0	0	0	0	0
SUMO2	P61956	Small ubiquitin-related modifier 2 OS=Homo sapiens GN=SUMO2 PE=1 SV=3;Small ubiquitin-related modifier 4 OS=Homo sapiens GN=SUMO4 PE=1 SV=2;Small ubiquitin-related modifier 3 OS=Homo sapiens GN=SUMO3 PE=1 SV=2	Small ubiquitin-related modifier 2;Small ubiquitin-related modifier 4;Small ubiquitin-related modifier 3	2;1;1	2;1;1	2;1;1	3	2	2	2	2	0	2	2	2	2	2	1	2	1	0	2	0	2	2	2	0	0	1	1	1	0	1	0	2	0	2	2	0	0	0	1	0	0	0	2	1	1	0
SUPT16H	Q9Y5B9	FACT complex subunit SPT16 OS=Homo sapiens GN=SUPT16H PE=1 SV=1	FACT complex subunit SPT16	9	9	9	1	9	9	9	1	0	3	3	3	0	4	4	8	6	2	1	1	2	1	2	1	0	0	0	0	0	1	0	0	0	0	0	0	0	1	3	0	0	0	0	1	0	0
SUPT5H	O00267	Transcription elongation factor SPT5 OS=Homo sapiens GN=SUPT5H PE=1 SV=1	Transcription elongation factor SPT5	5	5	5	1	5	5	5	0	0	5	3	3	0	1	1	5	3	0	1	0	0	0	0	0	0	0	0	0	0	0	0	1	0	1	0	0	0	0	0	0	0	0	0	0	0	0
SURF4	O15260	Surfeit locus protein 4 OS=Homo sapiens GN=SURF4 PE=1 SV=3	Surfeit locus protein 4	3	3	3	1	3	3	3	2	1	2	2	2	0	2	3	3	2	1	3	2	3	2	2	1	0	0	0	0	0	2	0	1	0	0	0	0	0	0	0	0	1	0	1	1	0	1
SVEP1	Q4LDE5	Sushi, von Willebrand factor type A, EGF and pentraxin domain-containing protein 1 OS=Homo sapiens GN=SVEP1 PE=1 SV=3	Sushi, von Willebrand factor type A, EGF and pentraxin domain-containing protein 1	5	5	5	1	5	5	5	1	1	0	0	0	0	1	1	1	1	1	4	1	1	1	3	4	0	0	3	1	0	3	1	0	0	0	0	0	0	0	0	0	5	0	1	3	1	2
SVIP	Q8NHG7	Small VCP/p97-interacting protein OS=Homo sapiens GN=SVIP PE=1 SV=1	Small VCP/p97-interacting protein	2	2	2	1	2	2	2	2	0	2	2	2	2	2	1	2	1	0	2	1	2	2	2	0	0	0	0	0	0	1	0	2	1	1	1	0	0	0	1	0	0	0	2	1	0	0
SYNCRIP	O60506	Heterogeneous nuclear ribonucleoprotein Q OS=Homo sapiens GN=SYNCRIP PE=1 SV=2	Heterogeneous nuclear ribonucleoprotein Q	11	11	7	1	11	11	7	5	0	9	10	9	2	8	5	10	10	2	4	6	4	2	2	2	0	0	0	1	0	2	1	4	1	1	1	0	0	0	3	0	2	0	1	1	1	0
SYNE1	Q8NF91	Nesprin-1 OS=Homo sapiens GN=SYNE1 PE=1 SV=4	Nesprin-1	3	3	3	1	3	3	3	0	0	0	0	1	0	0	0	1	0	0	0	0	0	0	1	0	0	1	1	2	0	0	0	0	0	0	0	0	0	0	0	1	0	0	0	0	1	0
SYNGR1	O43759	Synaptogyrin-1 OS=Homo sapiens GN=SYNGR1 PE=1 SV=2	Synaptogyrin-1	2	2	2	1	2	2	2	1	0	1	1	1	0	1	1	1	1	1	1	1	1	1	1	0	0	0	0	0	0	1	0	0	1	0	0	0	0	0	0	0	0	0	0	0	0	0
SYNGR2	O43760	Synaptogyrin-2 OS=Homo sapiens GN=SYNGR2 PE=1 SV=1	Synaptogyrin-2	2	2	2	1	2	2	2	1	1	1	1	1	1	2	1	2	1	1	1	1	1	1	1	1	1	1	0	1	0	1	0	1	1	1	1	0	0	2	2	1	1	0	2	1	0	2
SYPL1	Q16563	Synaptophysin-like protein 1 OS=Homo sapiens GN=SYPL1 PE=1 SV=1	Synaptophysin-like protein 1	3	3	3	1	3	3	3	3	1	3	3	3	2	3	3	3	3	2	3	2	3	3	2	2	2	0	1	0	1	3	1	1	1	3	1	0	1	1	3	1	3	0	3	3	1	3
TAGLN	Q01995	Transgelin OS=Homo sapiens GN=TAGLN PE=1 SV=4	Transgelin	11	11	11	1	11	11	11	10	1	8	8	8	4	8	5	8	7	1	9	4	10	9	8	5	0	0	4	0	0	9	1	4	1	2	0	0	0	1	4	0	6	0	10	7	0	7
TAGLN2	P37802	Transgelin-2 OS=Homo sapiens GN=TAGLN2 PE=1 SV=3	Transgelin-2	9	9	9	1	9	9	9	8	1	9	9	9	5	9	8	9	8	4	8	7	6	7	9	5	1	0	4	1	0	6	0	8	5	5	4	5	4	4	3	0	5	2	8	7	0	4
TALDO1	P37837	Transaldolase OS=Homo sapiens GN=TALDO1 PE=1 SV=2	Transaldolase	10	10	10	1	10	10	10	5	2	8	7	7	4	7	9	6	7	3	4	6	5	5	4	4	0	0	0	2	0	5	3	5	1	5	0	0	1	1	5	0	6	0	2	3	0	3
TAOK3	Q9H2K8	Serine/threonine-protein kinase TAO3 OS=Homo sapiens GN=TAOK3 PE=1 SV=2;Serine/threonine-protein kinase TAO1 OS=Homo sapiens GN=TAOK1 PE=1 SV=1	Serine/threonine-protein kinase TAO3;Serine/threonine-protein kinase TAO1	4;2;1	4;2;1	4;2;1	3	4	4	4	2	1	2	2	1	1	1	1	2	1	1	2	1	3	3	2	1	0	0	0	1	0	1	1	1	0	0	0	0	0	0	1	0	1	0	1	1	0	0
TARDBP	Q13148	TAR DNA-binding protein 43 OS=Homo sapiens GN=TARDBP PE=1 SV=1	TAR DNA-binding protein 43	3	3	3	1	3	3	3	1	0	2	3	3	1	2	1	3	3	0	1	2	1	1	1	0	0	0	1	1	0	0	1	1	0	1	0	0	0	0	2	0	0	0	1	1	0	1
TARS	P26639	Threonine--tRNA ligase, cytoplasmic OS=Homo sapiens GN=TARS PE=1 SV=3	Threonine--tRNA ligase, cytoplasmic	17	17	15	1	17	17	15	11	0	16	15	16	8	13	15	17	15	1	9	9	12	11	5	1	0	0	1	0	0	2	1	8	0	7	1	0	1	0	8	0	2	0	3	2	0	2
TBC1D15	Q8TC07	TBC1 domain family member 15 OS=Homo sapiens GN=TBC1D15 PE=1 SV=2	TBC1 domain family member 15	2	2	2	1	2	2	2	2	0	2	1	0	0	0	2	1	2	0	2	1	2	2	1	0	0	0	0	0	0	1	0	0	0	0	1	0	0	0	1	0	0	0	0	1	0	0
TBCA	O75347	Tubulin-specific chaperone A OS=Homo sapiens GN=TBCA PE=1 SV=3	Tubulin-specific chaperone A	5	5	5	1	5	5	5	3	0	3	3	5	4	4	4	3	3	0	3	1	2	2	1	1	0	0	0	0	0	1	0	3	1	4	0	0	0	0	1	0	1	0	3	3	0	1
TBCB	Q99426	Tubulin-folding cofactor B OS=Homo sapiens GN=TBCB PE=1 SV=2	Tubulin-folding cofactor B	2	2	2	1	2	2	2	2	0	2	2	2	2	2	2	2	2	0	2	0	2	2	2	0	0	0	0	0	0	0	0	2	2	0	1	0	0	0	0	0	0	0	2	2	0	0
TBL3	Q12788	Transducin beta-like protein 3 OS=Homo sapiens GN=TBL3 PE=1 SV=2	Transducin beta-like protein 3	2	2	2	1	2	2	2	0	0	0	0	0	0	1	0	2	2	0	0	0	0	0	0	0	0	0	0	0	0	0	0	0	0	0	0	0	0	0	0	0	0	0	0	0	0	0
TCEB1	Q15369	Transcription elongation factor B polypeptide 1 OS=Homo sapiens GN=TCEB1 PE=1 SV=1	Transcription elongation factor B polypeptide 1	4	4	4	1	4	4	4	4	0	4	4	4	3	4	4	4	4	1	4	3	4	4	3	1	0	0	2	1	0	3	0	2	2	3	3	1	0	2	1	0	3	0	2	2	0	2
TCEB2	Q15370	Transcription elongation factor B polypeptide 2 OS=Homo sapiens GN=TCEB2 PE=1 SV=1	Transcription elongation factor B polypeptide 2	5	5	5	1	5	5	5	4	0	5	4	4	3	4	4	5	4	2	4	3	4	4	5	1	0	0	1	1	0	3	0	4	0	3	0	0	0	0	2	0	1	0	1	1	0	0
TCIRG1	Q13488	V-type proton ATPase 116 kDa subunit a isoform 3 OS=Homo sapiens GN=TCIRG1 PE=1 SV=3	V-type proton ATPase 116 kDa subunit a isoform 3	5	5	5	1	5	5	5	1	0	2	4	4	1	4	4	3	4	0	2	2	2	2	2	0	0	0	0	0	0	1	0	0	0	0	0	0	0	0	0	0	0	0	0	0	0	0
TCP1	P17987	T-complex protein 1 subunit alpha OS=Homo sapiens GN=TCP1 PE=1 SV=1	T-complex protein 1 subunit alpha	26	26	26	1	26	26	26	21	1	24	25	25	13	21	21	24	23	12	18	15	18	16	16	9	0	0	6	1	1	16	4	18	8	14	7	4	2	9	15	2	8	1	11	10	0	8
TECR	Q9NZ01	Very-long-chain enoyl-CoA reductase OS=Homo sapiens GN=TECR PE=1 SV=1	Very-long-chain enoyl-CoA reductase	5	5	5	1	5	5	5	3	2	3	3	4	2	3	3	5	3	0	3	2	2	2	2	1	0	1	1	1	0	4	1	2	1	1	0	0	0	0	0	0	3	0	0	0	0	0
TENM3	Q9P273	Teneurin-3 OS=Homo sapiens GN=TENM3 PE=2 SV=3	Teneurin-3	15	15	15	1	15	15	15	13	0	12	12	12	0	9	6	9	6	0	13	2	14	14	12	0	0	0	1	0	0	8	0	3	0	2	1	0	0	0	6	0	5	2	11	11	0	6
TEX10	Q9NXF1	Testis-expressed sequence 10 protein OS=Homo sapiens GN=TEX10 PE=1 SV=2	Testis-expressed sequence 10 protein	4	4	4	1	4	4	4	0	0	0	0	0	0	0	1	4	3	0	0	0	0	0	0	0	0	0	0	0	0	0	0	0	0	0	0	0	0	0	0	0	0	0	0	0	0	0
TF	P02787	Serotransferrin OS=Homo sapiens GN=TF PE=1 SV=3	Serotransferrin	3	3	3	1	3	3	3	1	0	1	1	0	0	0	0	0	0	0	0	0	0	0	0	0	0	1	0	0	0	0	0	0	0	0	1	0	0	0	1	0	1	0	1	2	0	2
TFG	Q92734	Protein TFG OS=Homo sapiens GN=TFG PE=1 SV=2	Protein TFG	3	3	3	1	3	3	3	3	0	3	2	3	2	2	2	3	2	2	2	3	3	2	1	1	0	0	1	1	0	3	0	2	0	1	0	0	0	0	0	0	2	0	1	1	0	0
TFRC	P02786	Transferrin receptor protein 1 OS=Homo sapiens GN=TFRC PE=1 SV=2	Transferrin receptor protein 1;Transferrin receptor protein 1, serum form	30;1	30;1	30;1	2	30	30	30	25	1	29	28	30	16	29	22	29	26	6	23	20	21	22	20	11	1	0	13	3	1	22	3	19	10	13	4	2	1	4	12	0	15	0	16	14	0	11
TGFBI	Q15582	Transforming growth factor-beta-induced protein ig-h3 OS=Homo sapiens GN=TGFBI PE=1 SV=1	Transforming growth factor-beta-induced protein ig-h3	34	34	34	1	34	34	34	19	2	2	3	3	0	2	4	14	7	2	26	2	5	15	16	9	0	1	28	23	0	24	6	0	0	1	0	0	0	2	2	0	22	0	3	9	0	6
TGFBR2	P37173	TGF-beta receptor type-2 OS=Homo sapiens GN=TGFBR2 PE=1 SV=2	TGF-beta receptor type-2	2	2	2	1	2	2	2	2	0	0	0	1	0	0	0	1	0	0	2	0	2	2	2	0	0	0	1	0	0	2	0	0	0	0	0	0	0	0	0	0	0	0	0	0	0	0
TGM1	P22735	Protein-glutamine gamma-glutamyltransferase K OS=Homo sapiens GN=TGM1 PE=1 SV=4	Protein-glutamine gamma-glutamyltransferase K	18	18	18	1	18	18	18	16	14	14	15	12	11	17	16	11	16	16	16	17	13	14	16	17	9	8	9	10	7	17	13	12	3	8	6	3	2	3	14	6	17	3	14	14	3	12
TGM2	P21980	Protein-glutamine gamma-glutamyltransferase 2 OS=Homo sapiens GN=TGM2 PE=1 SV=2	Protein-glutamine gamma-glutamyltransferase 2	7	7	7	1	7	7	7	7	1	5	5	5	1	4	2	6	5	1	7	1	5	6	4	1	0	0	2	1	0	6	1	1	0	0	0	0	0	0	2	0	4	1	3	3	0	3
TGM3	Q08188	Protein-glutamine gamma-glutamyltransferase E OS=Homo sapiens GN=TGM3 PE=1 SV=4	Protein-glutamine gamma-glutamyltransferase E;Protein-glutamine gamma-glutamyltransferase E 50 kDa catalytic chain;Protein-glutamine gamma-glutamyltransferase E 27 kDa non-catalytic chain	26	26	26	1	26	26	26	19	16	17	18	19	16	16	19	16	18	23	20	22	17	18	19	20	14	16	16	15	9	22	19	18	7	16	11	5	6	7	16	11	22	2	20	20	9	21
THBS1	P07996	Thrombospondin-1 OS=Homo sapiens GN=THBS1 PE=1 SV=2	Thrombospondin-1	24	24	5	1	24	24	5	14	1	5	5	8	1	7	4	16	11	1	18	6	9	11	14	13	1	3	19	5	0	21	3	3	0	2	1	0	0	1	7	2	14	0	14	12	2	14
THOC2	Q8NI27	THO complex subunit 2 OS=Homo sapiens GN=THOC2 PE=1 SV=2	THO complex subunit 2	2	2	2	1	2	2	2	0	0	1	0	1	0	0	0	2	2	0	0	0	0	0	0	0	0	0	0	0	0	0	0	0	0	0	0	0	0	0	2	0	0	0	0	0	0	0
THOP1	P52888	Thimet oligopeptidase OS=Homo sapiens GN=THOP1 PE=1 SV=2	Thimet oligopeptidase	5	5	5	1	5	5	5	3	0	5	4	5	1	5	4	4	3	1	5	2	3	3	3	1	0	0	0	0	0	1	0	0	0	0	0	0	0	0	0	0	2	0	1	1	0	0
THY1	P04216	Thy-1 membrane glycoprotein OS=Homo sapiens GN=THY1 PE=1 SV=2	Thy-1 membrane glycoprotein	3	3	3	1	3	3	3	3	0	3	3	3	2	2	2	3	3	1	3	2	2	2	2	2	2	1	2	0	0	2	2	2	2	1	2	1	0	2	2	0	3	1	2	2	1	2
TIMM13	Q9Y5L4	Mitochondrial import inner membrane translocase subunit Tim13 OS=Homo sapiens GN=TIMM13 PE=1 SV=1	Mitochondrial import inner membrane translocase subunit Tim13	3	3	3	1	3	3	3	2	0	2	2	3	1	2	2	3	1	2	1	2	1	0	1	0	0	0	0	0	0	0	0	1	0	1	0	0	0	0	1	0	0	0	2	0	0	0
TIMM8A	O60220	Mitochondrial import inner membrane translocase subunit Tim8 A OS=Homo sapiens GN=TIMM8A PE=1 SV=1	Mitochondrial import inner membrane translocase subunit Tim8 A	2	2	2	1	2	2	2	1	1	1	2	1	0	1	2	2	2	0	1	1	0	0	0	0	0	0	0	0	0	0	0	0	0	0	0	0	0	0	1	0	0	0	1	0	0	0
TIMP2	P16035	Metalloproteinase inhibitor 2 OS=Homo sapiens GN=TIMP2 PE=1 SV=2	Metalloproteinase inhibitor 2	2	2	2	1	2	2	2	2	0	2	2	2	0	2	2	2	2	0	2	0	1	1	1	2	0	0	1	0	0	2	0	1	0	0	0	0	0	0	0	0	2	0	2	2	0	2
TJP1	Q07157	Tight junction protein ZO-1 OS=Homo sapiens GN=TJP1 PE=1 SV=3	Tight junction protein ZO-1	2	2	2	1	2	2	2	1	0	1	1	1	0	1	1	1	1	0	1	1	1	1	1	1	0	0	0	1	0	1	0	0	0	0	0	0	0	0	1	0	1	0	1	0	0	1
TKT	P29401	Transketolase OS=Homo sapiens GN=TKT PE=1 SV=3	Transketolase	25	25	25	1	25	25	25	21	4	24	22	23	14	21	18	20	18	10	18	14	15	14	11	8	2	5	5	3	1	14	6	17	16	17	11	1	3	5	10	2	15	1	11	9	2	10
TLDC1	Q6P9B6	TLD domain-containing protein 1 OS=Homo sapiens GN=TLDC1 PE=1 SV=2	TLD domain-containing protein 1	4	4	4	1	4	4	4	3	0	4	3	3	0	3	3	3	1	0	4	0	3	3	2	0	0	0	0	0	0	3	0	1	0	0	0	0	0	0	0	0	1	0	2	3	0	1
TLN1	Q9Y490	Talin-1 OS=Homo sapiens GN=TLN1 PE=1 SV=3	Talin-1	53;4	53;4	53;4	2	53	53	53	45	0	38	38	39	17	37	35	39	34	1	43	18	38	41	35	18	1	1	22	7	1	39	3	22	8	10	6	1	1	7	23	2	30	2	34	29	1	22
TM9SF1	O15321	Transmembrane 9 superfamily member 1 OS=Homo sapiens GN=TM9SF1 PE=2 SV=2	Transmembrane 9 superfamily member 1	3	3	3	1	3	3	3	0	0	0	1	2	0	1	2	3	3	0	0	1	1	1	0	0	0	0	0	0	0	0	0	0	0	1	0	0	0	0	0	0	0	0	0	0	0	0
[truncated: 250 more rows]
[truncated: 467 more columns]
