# Supplementary material for: The host exosome pathway underpins biogenesis of the human cytomegalovirus virion
Source: eLife. 2020 Sep 10;9:e58288. doi: 10.7554/eLife.58288 (PMC7556872; doi:10.7554/eLife.58288)
Supplement: Supplementary file 3. [file elife-58288-supp3.xlsx]

## Sheet: qPCR primers & siRNA sequences
	qPCR primer sequences
	Gene name	Gene Accession	Forward	Reverse
	TMED10	NM_006827	5'-CGAAGAGATTGCAAAAGTTG-3'	5'-AAGATGCTGAAGTATAGGACC-3'
	VCP	NM_007126	5'-TAGAGGAATCCTGCTTTACG-3'	5'-CCATTGATCAAGAAGAAGAAGG-3'
	STX3	NM_004177	5'-GAAACTGATTTCACTCCAGAC-3'	5'-ATCAGGTAGATCACATTCCC-3'
	IGF2R	NM_000876	5'-GAGGGAAACAGTGATAAGTAAG-3'	5'-CACCTTTGAGTATTTGTAGGAC-3'
	MYH9	NM_002473	5'-GTGAAGAATGACAACTCCTC-3'	5'-GATAAGTCTCAATGTTGGCTC-3'
	COPB2	NM_004766	5'-ATGGAACAGTACGTATTTGG-3'	5'-GACATTGTTTGACCCTCTTAG-3'
	VAMP3	NM_004781	5'-ATCAAGTAGATGAGGTGGTG-3'	5'-ACATCTTGCAATTCTTCCAC-3'
	SEC22B	NM_004892	5'-ACTACATTATTGAGCAGGGG-3'	5'-CAATAAAGGAATAGGGTCGG-3'
	VPS35	NM_018206	5'-ATGAAGAAACAACTGGTGAC-3'	5'-AGTTCTTGTCTTTCTCGTTC-3'
	siRNA sequences
	Pool Catalog Number	Duplex Catalog Number	Gene name	GENE ID	Gene Accession	GI Number	Sequence
	M-003718-01	D-003718-01	TMED10	10972	NM_006827	98986463	GCGGAUACCUGACCAACUC
	M-003718-01	D-003718-02	TMED10	10972	NM_006827	98986463	UCACAAGGACCUGCUAGUG
	M-003718-01	D-003718-03	TMED10	10972	NM_006827	98986463	GCCAUAUUCUCUACUCCAA
	M-003718-01	D-003718-04	TMED10	10972	NM_006827	98986463	GAGCUGCGACGCCUAGAAG
	M-008727-01	D-008727-05	VCP	7415	NM_007126	7669552	GUAAUCUCUUCGAGGUAUA
	M-008727-01	D-008727-06	VCP	7415	NM_007126	7669552	AAACAGAUCCUAGCCCUUA
	M-008727-01	D-008727-07	VCP	7415	NM_007126	7669552	GAGAGCAACCUUCGUAAAG
	M-008727-01	D-008727-08	VCP	7415	NM_007126	7669552	GCACAGGUGGCAGUGUAUA
	M-015401-00	D-015401-01	STX3	6809	NM_004177	34147491	CUAAGAAACUCUACAGUAU
	M-015401-00	D-015401-02	STX3	6809	NM_004177	34147491	AAACUCGGCUUAACAUUGA
	M-015401-00	D-015401-03	STX3	6809	NM_004177	34147491	GAUCAUUGACUCACAGAUU
	M-015401-00	D-015401-04	STX3	6809	NM_004177	34147491	AGGGUGAGAUGUUAGAUAA
	M-007668-01	D-007668-01	MYH9	4627	NM_002473	51317362	GAAGUCAGCUCCCUAAAGA
	M-007668-01	D-007668-02	MYH9	4627	NM_002473	51317362	GCACAGAGCUGGCCGACAA
	M-007668-01	D-007668-03	MYH9	4627	NM_002473	51317362	GGCCAAACCUGCCGAAUAA
	M-007668-01	D-007668-04	MYH9	4627	NM_002473	51317362	GAACAUGGCCCUCAAGAAG
	M-019847-03	D-019847-03	COPB2	9276	NM_004766	4758031	CAACAGCAUUGUAAAGAUA
	M-019847-03	D-019847-04	COPB2	9276	NM_004766	4758031	GGACACACCCAUUAUGUUA
	M-019847-03	D-019847-23	COPB2	9276	NM_004766	4758031	GGUCAAACAAUGUCGCUUU
	M-019847-03	D-019847-24	COPB2	9276	NM_004766	4758031	GGUUGUGACAGGAGCGGAU
	M-010601-01	D-010601-01	IGF2R	3482	NM_000876	119964725	GAAUUGACCUGUACAAAGA
	M-010601-01	D-010601-02	IGF2R	3482	NM_000876	119964725	GAAAUUGAGUGGAUUACUG
	M-010601-01	D-010601-03	IGF2R	3482	NM_000876	119964725	GAAGUGGUUUCCAUCAGUA
	M-010601-01	D-010601-04	IGF2R	3482	NM_000876	119964725	GUGGAGAGAUGGCAUAAUU
	M-010894-00	D-010894-01	VPS35	55737	NM_018206	17999540	UUACAAGUCUCUCUGAUUA
	M-010894-00	D-010894-02	VPS35	55737	NM_018206	17999540	GAACAUAUUGCUACCAGUA
	M-010894-00	D-010894-03	VPS35	55737	NM_018206	17999540	GUUGUUAUGUGCUUAGUAA
	M-010894-00	D-010894-04	VPS35	55737	NM_018206	17999540	AAAUACCAGUUGACACUUA
	M-011963-01	D-011963-01	SEC22B	9554	NM_004892	94429049	GAAGAAGUGUUACAACGAG
	M-011963-01	D-011963-02	SEC22B	9554	NM_004892	94429049	CUAAGCAACUCUUUCGAAA
	M-011963-01	D-011963-03	SEC22B	9554	NM_004892	94429049	UAACAAUGAUCGCCCGAGU
	M-011963-01	D-011963-04	SEC22B	9554	NM_004892	94429049	AAUAGUGUAUGUCCGAUUC
	M-011934-01	D-011934-01	VAMP3	9341	NM_004781	42544205	GGCAGGCGCUUCUCAAUUU
	M-011934-01	D-011934-02	VAMP3	9341	NM_004781	42544205	GGAUUACUGUUCUGGUUAU
	M-011934-01	D-011934-04	VAMP3	9341	NM_004781	42544205	GCCAAGUUGAAGAGGAAAU
	M-011934-01	D-011934-17	VAMP3	9341	NM_004781	42544205	GAAACUUUGUCAUCGGAAA
	D-001206-13	D-001210-01	siGENOME Non-targeting Control	0		0	UAGCGACUAAACACAUCAA
	D-001206-13	D-001210-02	siGENOME Non-targeting Control	0		0	UAAGGCUAUGAAGAGAUAC
	D-001206-13	D-001210-03	siGENOME Non-targeting Control	0		0	AUGUAUUGGCCUGUAUUAG
	D-001206-13	D-001210-04	siGENOME Non-targeting Control	0		0	AUGAACGUGAAUUGCUCAA
